# Supplementary material for: Platelet-Rich Fibrin Increases BMP2 Expression in Oral Fibroblasts via Activation of TGF-β Signaling
Source: MDPI journal article supplement (doi:10.3390/ijms22157935), 2021-07-25
Supplement: s1 [file s1]

Table S3: Revigo analysis reduced the visualize gene ontology to 350 GO term that are listed.

| TermID     | Name                                                                    | Frequency | PlotX  | PlotY  | LogSize |
|------------|-------------------------------------------------------------------------|-----------|--------|--------|---------|
| GO:0007190 | "activation of adenylate cyclase activity"                              | 0.003     | -6.602 | -3.297 | 2.839   |
| GO:0019882 | "antigen processing and presentation"                                   | 0.025     | 1.579  | -0.073 | 3.756   |
| GO:0043473 | "pigmentation"                                                          | 0.029     | 2.153  | -1.686 | 3.82    |
| GO:0048771 | "tissue remodeling"                                                     | 0.019     | 2.849  | -5.723 | 3.642   |
| GO:1905324 | "telomere-telomerase complex assembly"                                  | 0         | 6.445  | -0.588 | 0.903   |
| GO:0045197 | "establishment or maintenance of epithelial cell apical/basal polarity" | 0.009     | 2.926  | -2.279 | 3.283   |
| GO:0051402 | "neuron apoptotic process"                                              | 0.009     | -0.229 | -1.143 | 3.314   |
| GO:0006458 | "'de novo' protein folding"                                             | 0.028     | -5.085 | -6.046 | 3.793   |
| GO:0006509 | "membrane protein ectodomain proteolysis"                               | 0.007     | 5.512  | 4.945  | 3.186   |
| GO:0006312 | "mitotic recombination"                                                 | 0.013     | -0.703 | 7.377  | 3.475   |
| GO:0060998 | "regulation of dendritic spine development"                             | 0.007     | -3.507 | 0.834  | 3.167   |
| GO:0090559 | "regulation of membrane permeability"                                   | 0.013     | -5.788 | -2.58  | 3.458   |
| GO:0051445 | "regulation of meiotic cell cycle"                                      | 0.021     | -5.543 | 1.523  | 3.665   |
| GO:0043949 | "regulation of cAMP-mediated signaling"                                 | 0.005     | -4.186 | -0.388 | 3.042   |
| GO:0050818 | "regulation of coagulation"                                             | 0.018     | -7.26  | -1.567 | 3.609   |
| GO:0051642 | "centrosome localization"                                               | 0.007     | -2.69  | -5.74  | 3.181   |
| GO:1902414 | "protein localization to cell junction"                                 | 0.016     | -2.532 | -6.567 | 3.548   |
| GO:0015871 | "choline transport"                                                     | 0.01      | -0.644 | -6.915 | 3.362   |
| GO:0010821 | "regulation of mitochondrion organization"                              | 0.027     | -7.322 | 1.61   | 3.78    |
| GO:0060968 | "regulation of gene silencing"                                          | 0.027     | -7.57  | 0.774  | 3.789   |
| GO:0007041 | "lysosomal transport"                                                   | 0.022     | 0.003  | -6.703 | 3.699   |
| GO:0008333 | "endosome to lysosome transport"                                        | 0.01      | null   | null   | 3.337   |
| GO:0006622 | "protein targeting to lysosome"                                         | 0.005     | null   | null   | 3.012   |
| GO:0000380 | "alternative mRNA splicing via spliceosome"                             | 0.005     | 0.005  | -0.499 | 7.194   |
| GO:0072376 | "protein activation cascade"                                            | 0.003     | -3.114 | 6.348  | 2.868   |

|           |                                                                                         |                 |        |        |        |
|-----------|-----------------------------------------------------------------------------------------|-----------------|--------|--------|--------|
| GO:009014 |                                                                                         |                 |        |        |        |
| 8         | "membrane fission"                                                                      | 0.006           | 5.67   | -1.409 | 3.156  |
| GO:003235 |                                                                                         |                 |        |        |        |
| 5         | "response to estradiol"                                                                 | 0.009           | -4.701 | 6.431  | 3.301  |
| GO:004645 |                                                                                         |                 |        |        |        |
| 6         | "icosanoid biosynthetic process"                                                        | 0.013           | 1.907  | 3.078  | 3.473  |
| GO:000669 |                                                                                         |                 |        |        |        |
| 3         | "prostaglandin metabolic process"                                                       | 0.015           | null   | null   | 3.522  |
| GO:003519 |                                                                                         |                 |        |        |        |
| 5         | "gene silencing by miRNA"                                                               | 0.02            | -7.535 | -0.166 | 3.66   |
| GO:003243 |                                                                                         |                 |        |        |        |
| 8         | "melanosome organization"                                                               | 0.004           | 5.975  | -2.005 | 2.974  |
| GO:006026 | "positive regulation of transcription initiation from RNA polymerase II promoter"       | 0.014           | -7.534 | 0.451  | 3.503  |
| GO:004589 | "positive regulation of RNA polymerase II transcription preinitiation complex assembly" | 0.01            | null   | null   | 3.348  |
| GO:000752 |                                                                                         |                 |        |        |        |
| 8         | "neuromuscular junction development"                                                    | 0.011           | 6.194  | -2.076 | 3.385  |
| GO:000704 |                                                                                         |                 |        |        |        |
| 4         | "cell-substrate junction assembly"                                                      | 0.007           | null   | null   | 3.182  |
| GO:009706 |                                                                                         |                 |        |        |        |
| 1         | "dendritic spine organization"                                                          | 0.004           | null   | null   | 2.966  |
| GO:001810 |                                                                                         |                 |        |        |        |
| 7         | "peptidyl-threonine phosphorylation"                                                    | 0.019           | 4.788  | 5.198  | 3.637  |
| GO:003820 |                                                                                         |                 |        |        |        |
| 2         | "TORC1 signaling"                                                                       | 0.003           | -5.49  | 4.162  | 2.86   |
| GO:003414 |                                                                                         |                 |        |        |        |
| 2         | "toll-like receptor 4 signaling pathway"                                                | 0.003           | -5.342 | 4.208  | 2.892  |
| GO:001993 |                                                                                         |                 |        |        |        |
| 4         | "cGMP-mediated signaling"                                                               | 0.003           | -5.592 | 4.194  | 2.81   |
| GO:004801 |                                                                                         |                 |        |        |        |
| 6         | "inositol phosphate-mediated signaling"                                                 | 0.01            | null   | null   | 3.332  |
| GO:001993 |                                                                                         |                 |        |        |        |
| 3         | "cAMP-mediated signaling"                                                               | 0.007           | null   | null   | 3.176  |
| GO:004214 |                                                                                         |                 |        |        |        |
| 4         | "vacuole fusion                                                                         | non-autophagic" | 0.006  | 6.092  | -1.928 |
| GO:009950 |                                                                                         |                 |        |        |        |
| 0         | "vesicle fusion to plasma membrane"                                                     | 0.002           | null   | null   | 2.621  |
| GO:000704 |                                                                                         |                 |        |        |        |
| 0         | "lysosome organization"                                                                 | 0.021           | null   | null   | 3.673  |
| GO:000725 |                                                                                         |                 |        |        |        |
| 9         | "receptor signaling pathway via JAK-STAT"                                               | 0.007           | -5.606 | 3.87   | 3.212  |
| GO:007037 |                                                                                         |                 |        |        |        |
| 1         | "ERK1 and ERK2 cascade"                                                                 | 0.005           | -5.247 | 4.034  | 3.017  |
| GO:003264 |                                                                                         |                 |        |        |        |
| 0         | "tumor necrosis factor production"                                                      | 0               | 3.088  | -4.26  | 1      |
| GO:003020 |                                                                                         |                 |        |        |        |
| 4         | "chondroitin sulfate metabolic process"                                                 | 0.007           | 4.984  | 4.533  | 3.217  |
| GO:005065 | "chondroitin sulfate proteoglycan biosynthetic process"                                 | 0.008           | null   | null   | 3.255  |
| GO:003806 |                                                                                         |                 |        |        |        |
| 1         | "NIK/NF-kappaB signaling"                                                               | 0.007           | -5.467 | 3.939  | 3.187  |
| GO:000720 | "phospholipase C-activating G protein-coupled receptor signaling pathway"               | 0.015           | -5.743 | 3.677  | 3.524  |
| 0         |                                                                                         |                 |        |        |        |

|           |                                                                  |       |        |        |       |
|-----------|------------------------------------------------------------------|-------|--------|--------|-------|
| GO:004349 |                                                                  |       |        |        |       |
| 1         | "protein kinase B signaling"                                     | 0.008 | -5.206 | 3.861  | 3.238 |
| GO:000096 |                                                                  |       |        |        |       |
| 3         | "mitochondrial RNA processing"                                   | 0.011 | -0.369 | 7.144  | 3.403 |
| GO:003532 |                                                                  |       |        |        |       |
| 9         | "hippo signaling"                                                | 0.01  | -5.342 | 3.809  | 3.331 |
| GO:000072 |                                                                  |       |        |        |       |
| 9         | "DNA double-strand break processing"                             | 0.007 | -2.587 | 6.162  | 3.183 |
| GO:000724 |                                                                  |       |        |        |       |
| 9         | "I-kappaB kinase/NF-kappaB signaling"                            | 0.02  | -5.445 | 3.613  | 3.652 |
| GO:003396 |                                                                  |       |        |        |       |
| 2         | "P-body assembly"                                                | 0.007 | 5.995  | -0.927 | 3.182 |
| GO:000703 |                                                                  |       |        |        |       |
| 9         | "protein catabolic process in the vacuole"                       | 0.003 | 5.563  | 4.174  | 2.754 |
| GO:003208 | "negative regulation of NF-kappaB transcription factor activity" | 0.016 | -7.317 | -0.668 | 3.558 |
| GO:003541 |                                                                  |       |        |        |       |
| 8         | "protein localization to synapse"                                | 0.011 | -2.673 | -6.531 | 3.398 |
| GO:009896 | "neurotransmitter receptor transport to postsynaptic membrane"   | 0.002 | null   | null   | 2.732 |
| GO:009712 |                                                                  |       |        |        |       |
| 0         | "receptor localization to synapse"                               | 0.008 | null   | null   | 3.269 |
| GO:003439 |                                                                  |       |        |        |       |
| 4         | "protein localization to cell surface"                           | 0.006 | -2.709 | -6.101 | 3.14  |
| GO:000150 |                                                                  |       |        |        |       |
| 8         | "action potential"                                               | 0.015 | -5.981 | -2.516 | 3.523 |
| GO:003438 |                                                                  |       |        |        |       |
| 1         | "plasma lipoprotein particle clearance"                          | 0.003 | -2.101 | -1.988 | 2.812 |
| GO:000181 |                                                                  |       |        |        |       |
| 6         | "cytokine production"                                            | 0.004 | 3.128  | -4.021 | 2.953 |
| GO:004576 |                                                                  |       |        |        |       |
| 1         | "regulation of adenylate cyclase activity"                       | 0.008 | -6.721 | -2.901 | 3.276 |
| GO:004510 | "intermediate filament cytoskeleton organization"                | 0.024 | 5.947  | -1.709 | 3.728 |
| GO:004311 |                                                                  |       |        |        |       |
| 3         | "receptor clustering"                                            | 0.008 | -2.611 | -6.173 | 3.277 |
| GO:006019 |                                                                  |       |        |        |       |
| 1         | "regulation of lipase activity"                                  | 0.01  | -6.629 | -2.869 | 3.372 |
| GO:000758 |                                                                  |       |        |        |       |
| 6         | "digestion"                                                      | 0.02  | 2.878  | -5.822 | 3.66  |
| GO:003450 |                                                                  |       |        |        |       |
| 1         | "protein localization to kinetochore"                            | 0.01  | -2.531 | -6.143 | 3.358 |
| GO:001998 |                                                                  |       |        |        |       |
| 5         | "translesion synthesis"                                          | 0.02  | -1.916 | 5.919  | 3.654 |
| GO:003109 | "stress-activated protein kinase signaling cascade"              | 0.021 | -5.069 | 3.723  | 3.673 |
| GO:000630 |                                                                  |       |        |        |       |
| 1         | "postreplication repair"                                         | 0.03  | -2.397 | 6.096  | 3.835 |
| GO:001076 | "regulation of cell morphogenesis involved in differentiation"   | 0.015 | -3.884 | 0.94   | 3.518 |
| GO:004247 |                                                                  |       |        |        |       |
| 5         | "odontogenesis of dentin-containing tooth"                       | 0.012 | 3.67   | -5.319 | 3.428 |
| GO:006104 |                                                                  |       |        |        |       |
| 1         | "regulation of wound healing"                                    | 0.025 | -4.617 | -0.699 | 3.746 |

|           |                                                                                                                                      |       |        |        |       |
|-----------|--------------------------------------------------------------------------------------------------------------------------------------|-------|--------|--------|-------|
| GO:003019 |                                                                                                                                      |       |        |        |       |
| 5         | "negative regulation of blood coagulation"                                                                                           | 0.008 | null   | null   | 3.248 |
| GO:009030 |                                                                                                                                      |       |        |        |       |
| 3         | "positive regulation of wound healing"                                                                                               | 0.01  | null   | null   | 3.362 |
| GO:000815 |                                                                                                                                      |       |        |        |       |
| 6         | "negative regulation of DNA replication"                                                                                             | 0.029 | -7.256 | 0.087  | 3.812 |
| GO:004327 |                                                                                                                                      |       |        |        |       |
| 7         | "apoptotic cell clearance"                                                                                                           | 0.008 | 0.025  | -6.083 | 3.272 |
| GO:000170 |                                                                                                                                      |       |        |        |       |
| 8         | "cell fate specification"                                                                                                            | 0.027 | 4.38   | -5.167 | 3.786 |
| GO:001051 |                                                                                                                                      |       |        |        |       |
| 8         | "positive regulation of phospholipase activity"                                                                                      | 0.007 | -6.801 | -2.939 | 3.175 |
| GO:000720 |                                                                                                                                      |       |        |        |       |
| 2         | "activation of phospholipase C activity"                                                                                             | 0.003 | null   | null   | 2.836 |
| GO:001051 |                                                                                                                                      |       |        |        |       |
| 7         | "regulation of phospholipase activity"                                                                                               | 0.008 | null   | null   | 3.247 |
| GO:003139 |                                                                                                                                      |       |        |        |       |
| 7         | "negative regulation of protein ubiquitination"                                                                                      | 0.017 | -7.43  | 0.094  | 3.572 |
| GO:000003 |                                                                                                                                      |       |        |        |       |
| 8         | "very long-chain fatty acid metabolic process"                                                                                       | 0.021 | 4.581  | 2.338  | 3.674 |
| GO:004209 |                                                                                                                                      |       |        |        |       |
| 2         | "type 2 immune response"                                                                                                             | 0.001 | -3.542 | 5.662  | 2.354 |
| GO:007055 |                                                                                                                                      |       |        |        |       |
| 5         | "response to interleukin-1"                                                                                                          | 0.017 | -4.752 | 6.351  | 3.577 |
| GO:004205 |                                                                                                                                      |       |        |        |       |
| 8         | "regulation of epidermal growth factor receptor signaling pathway"                                                                   | 0.013 | -4.428 | -0.212 | 3.476 |
| GO:003245 |                                                                                                                                      |       |        |        |       |
| 6         | "endocytic recycling"                                                                                                                | 0.022 | -1.811 | -5.655 | 3.698 |
| GO:003251 |                                                                                                                                      |       |        |        |       |
| 1         | "late endosome to vacuole transport via multivesicular body sorting pathway"                                                         | 0.026 | null   | null   | 3.772 |
| GO:004332 |                                                                                                                                      |       |        |        |       |
| 8         | "protein transport to vacuole involved in ubiquitin-dependent protein catabolic process via the multivesicular body sorting pathway" | 0.017 | null   | null   | 3.574 |
| GO:000204 |                                                                                                                                      |       |        |        |       |
| 0         | "sprouting angiogenesis"                                                                                                             | 0.015 | 3.461  | -5.554 | 3.529 |
| GO:004395 |                                                                                                                                      |       |        |        |       |
| 1         | "negative regulation of cAMP-mediated signaling"                                                                                     | 0.003 | -4.354 | -0.559 | 2.753 |
| GO:004881 |                                                                                                                                      |       |        |        |       |
| 4         | "regulation of dendrite morphogenesis"                                                                                               | 0.01  | -4.919 | 1.316  | 3.353 |
| GO:004505 |                                                                                                                                      |       |        |        |       |
| 5         | "regulated exocytosis"                                                                                                               | 0.031 | -0.219 | -5.942 | 3.838 |
| GO:001715 |                                                                                                                                      |       |        |        |       |
| 6         | "calcium-ion regulated exocytosis"                                                                                                   | 0.012 | null   | null   | 3.414 |
| GO:000722 |                                                                                                                                      |       |        |        |       |
| 4         | "smoothened signaling pathway"                                                                                                       | 0.024 | -5.291 | 3.489  | 3.74  |
| GO:007121 |                                                                                                                                      |       |        |        |       |
| 8         | "cellular response to misfolded protein"                                                                                             | 0.019 | -4.5   | 6.195  | 3.633 |
| GO:006146 |                                                                                                                                      |       |        |        |       |
| 2         | "protein localization to lysosome"                                                                                                   | 0.007 | -2.623 | -6.05  | 3.22  |
| GO:190534 |                                                                                                                                      |       |        |        |       |
| 9         | "ciliary transition zone assembly"                                                                                                   | 0     | 6.268  | -0.666 | 1.813 |
| GO:004255 |                                                                                                                                      |       |        |        |       |
| 2         | "myelination"                                                                                                                        | 0.023 | 3.445  | -5.331 | 3.706 |

|            |                                                                             |                                                  |        |        |        |
|------------|-----------------------------------------------------------------------------|--------------------------------------------------|--------|--------|--------|
| GO:0006636 | "unsaturated fatty acid biosynthetic process"                               | 0.025                                            | 3.192  | 3.015  | 3.749  |
| GO:0061512 | "protein localization to cilium"                                            | 0.011                                            | -2.531 | -6.04  | 3.377  |
| GO:0097712 | "vesicle targeting"                                                         | trans-Golgi to periciliary membrane compartment" | 0      | 1.352  | -4.237 |
| GO:0030307 | "positive regulation of cell growth"                                        | 0.027                                            | -7.164 | 1.317  | 3.778  |
| GO:0002377 | "immunoglobulin production"                                                 | 0.005                                            | 1.412  | 1.375  | 3.064  |
| GO:0010324 | "membrane invagination"                                                     | 0.014                                            | 6.316  | -1.859 | 3.488  |
| GO:0007193 | "adenylate cyclase-inhibiting G protein-coupled receptor signaling pathway" | 0.015                                            | -5.699 | 3.661  | 3.534  |
| GO:0007189 | "adenylate cyclase-activating G protein-coupled receptor signaling pathway" | 0.028                                            | null   | null   | 3.792  |
| GO:0002440 | "production of molecular mediator of immune response"                       | 0.005                                            | 1.312  | 1.47   | 3.091  |
| GO:0001705 | "ectoderm formation"                                                        | 0.001                                            | 3.577  | -5.601 | 2.201  |
| GO:0001706 | "endoderm formation"                                                        | 0.01                                             | null   | null   | 3.372  |
| GO:0001707 | "mesoderm formation"                                                        | 0.015                                            | null   | null   | 3.521  |
| GO:0070509 | "calcium ion import"                                                        | 0.018                                            | -0.551 | -6.834 | 3.606  |
| GO:0006851 | "mitochondrial calcium ion transmembrane transport"                         | 0.014                                            | null   | null   | 3.487  |
| GO:0060401 | "cytosolic calcium ion transport"                                           | 0.031                                            | null   | null   | 3.838  |
| GO:0044380 | "protein localization to cytoskeleton"                                      | 0.014                                            | -2.454 | -6.04  | 3.503  |
| GO:0061844 | "antimicrobial humoral immune response mediated by antimicrobial peptide"   | 0.007                                            | -3.695 | 5.583  | 3.171  |
| GO:0006956 | "complement activation"                                                     | 0.023                                            | null   | null   | 3.722  |
| GO:0002429 | "immune response-activating cell surface receptor signaling pathway"        | 0.03                                             | null   | null   | 3.829  |
| GO:0019731 | "antibacterial humoral response"                                            | 0.006                                            | null   | null   | 3.137  |
| GO:0050853 | "B cell receptor signaling pathway"                                         | 0.013                                            | null   | null   | 3.465  |
| GO:0050852 | "T cell receptor signaling pathway"                                         | 0.014                                            | null   | null   | 3.497  |
| GO:0001889 | "liver development"                                                         | 0.026                                            | 3.49   | -5.473 | 3.77   |
| GO:0045124 | "regulation of bone resorption"                                             | 0.006                                            | -6.542 | -2.131 | 3.144  |
| GO:0034067 | "protein localization to Golgi apparatus"                                   | 0.016                                            | -2.437 | -6.128 | 3.55   |

|           |                                                                                     |       |        |        |       |
|-----------|-------------------------------------------------------------------------------------|-------|--------|--------|-------|
| GO:009960 | "regulation of neurotransmitter receptor activity"                                  | 0.014 | -5.026 | -0.803 | 3.486 |
| 1         |                                                                                     |       |        |        |       |
| GO:200031 | "regulation of AMPA receptor activity"                                              | 0.004 | null   | null   | 2.935 |
| 1         |                                                                                     |       |        |        |       |
| GO:007097 | "protein K11-linked ubiquitination"                                                 | 0.008 | 4.802  | 5.872  | 3.246 |
| 9         |                                                                                     |       |        |        |       |
| GO:007093 | "protein K48-linked ubiquitination"                                                 | 0.012 | null   | null   | 3.43  |
| 6         |                                                                                     |       |        |        |       |
| GO:007053 | "protein K63-linked ubiquitination"                                                 | 0.018 | null   | null   | 3.606 |
| 4         |                                                                                     |       |        |        |       |
| GO:001082 | "regulation of centrosome duplication"                                              | 0.012 | -7.395 | 1.804  | 3.437 |
| 4         |                                                                                     |       |        |        |       |
| GO:004240 | "cristae formation"                                                                 | 0.013 | 6.189  | -1.726 | 3.474 |
| 7         |                                                                                     |       |        |        |       |
| GO:009028 | "negative regulation of cellular response to growth factor stimulus"                | 0.024 | -5.125 | -0.365 | 3.74  |
| 8         |                                                                                     |       |        |        |       |
| GO:003051 | "negative regulation of BMP signaling pathway"                                      | 0.015 | null   | null   | 3.523 |
| 4         |                                                                                     |       |        |        |       |
| GO:003051 | "negative regulation of transforming growth factor beta receptor signaling pathway" | 0.018 | null   | null   | 3.611 |
| 2         |                                                                                     |       |        |        |       |
| GO:003352 | "histone H2A ubiquitination"                                                        | 0.008 | 5.689  | 0.407  | 3.271 |
| 2         |                                                                                     |       |        |        |       |
| GO:000008 | "G1/S transition of mitotic cell cycle"                                             | 0.028 | -5.043 | -5.655 | 3.805 |
| 2         |                                                                                     |       |        |        |       |
| GO:000709 | "metaphase/anaphase transition of mitotic cell cycle"                               | 0.004 | null   | null   | 2.934 |
| 1         |                                                                                     |       |        |        |       |
| GO:001406 | "regulation of phosphatidylinositol 3-kinase signaling"                             | 0.017 | -4.536 | -0.242 | 3.581 |
| 6         |                                                                                     |       |        |        |       |
| GO:007032 | "triglyceride homeostasis"                                                          | 0.007 | -5.834 | -2.787 | 3.188 |
| 8         |                                                                                     |       |        |        |       |
| GO:004263 | "cholesterol homeostasis"                                                           | 0.018 | null   | null   | 3.614 |
| 2         |                                                                                     |       |        |        |       |
| GO:000271 | "regulation of cytokine production involved in immune response"                     | 0.014 | -7.38  | -1.082 | 3.511 |
| 8         |                                                                                     |       |        |        |       |
| GO:190122 | "positive regulation of NIK/NF-kappaB signaling"                                    | 0.011 | -4.633 | -0.299 | 3.374 |
| 4         |                                                                                     |       |        |        |       |
| GO:000827 | "regulation of G protein-coupled receptor signaling pathway"                        | 0.029 | -4.71  | -0.072 | 3.812 |
| 7         |                                                                                     |       |        |        |       |
| GO:007267 | "lymphocyte migration"                                                              | 0.009 | -0.865 | -4.535 | 3.299 |
| 6         |                                                                                     |       |        |        |       |
| GO:199026 | "neutrophil migration"                                                              | 0.012 | null   | null   | 3.449 |
| 6         |                                                                                     |       |        |        |       |
| GO:007162 | "granulocyte chemotaxis"                                                            | 0.012 | null   | null   | 3.447 |
| 1         |                                                                                     |       |        |        |       |
| GO:000244 | "lymphocyte mediated immunity"                                                      | 0.026 | 1.527  | -0.118 | 3.767 |
| 9         |                                                                                     |       |        |        |       |
| GO:000245 | "T cell mediated immunity"                                                          | 0.003 | null   | null   | 2.859 |
| 6         |                                                                                     |       |        |        |       |
| GO:003027 | "regulation of ossification"                                                        | 0.025 | -7.221 | -1.463 | 3.744 |
| 8         |                                                                                     |       |        |        |       |
| GO:003241 | "lysosome localization"                                                             | 0.009 | -2.597 | -5.71  | 3.306 |
| 8         |                                                                                     |       |        |        |       |
| GO:003455 | "mitochondrial respiratory chain complex III assembly"                              | 0.011 | 5.98   | -1.053 | 3.401 |
| 1         |                                                                                     |       |        |        |       |

|           |                                                  |       |        |        |       |
|-----------|--------------------------------------------------|-------|--------|--------|-------|
| GO:000709 |                                                  |       |        |        |       |
| 7         | "nuclear migration"                              | 0.009 | -2.458 | -5.675 | 3.284 |
| GO:005189 |                                                  |       |        |        |       |
| 6         | "regulation of protein kinase B signaling"       | 0.027 | -4.671 | -0.135 | 3.781 |
| GO:000662 |                                                  |       |        |        |       |
| 4         | "vacuolar protein processing"                    | 0.003 | 4.494  | 4.688  | 2.846 |
| GO:009719 | "extrinsic apoptotic signaling pathway in        |       |        |        |       |
| 2         | absence of ligand"                               | 0.005 | -4.84  | 3.708  | 3.041 |
| GO:000862 | "extrinsic apoptotic signaling pathway via death |       |        |        |       |
| 5         | domain receptors"                                | 0.005 | null   | null   | 3.062 |
| GO:000658 |                                                  |       |        |        |       |
| 4         | "catecholamine metabolic process"                | 0.01  | -1.009 | 7.726  | 3.365 |
| GO:000026 |                                                  |       |        |        |       |
| 6         | "mitochondrial fission"                          | 0.02  | 6.098  | -1.704 | 3.654 |
| GO:000701 |                                                  |       |        |        |       |
| 9         | "microtubule depolymerization"                   | 0.004 | 5.739  | -1.856 | 2.997 |
| GO:003004 |                                                  |       |        |        |       |
| 2         | "actin filament depolymerization"                | 0.022 | null   | null   | 3.686 |
| GO:003004 |                                                  |       |        |        |       |
| 1         | "actin filament polymerization"                  | 0.023 | null   | null   | 3.715 |
| GO:003028 |                                                  |       |        |        |       |
| 2         | "bone mineralization"                            | 0.01  | 3.701  | -5.385 | 3.363 |
| GO:004874 |                                                  |       |        |        |       |
| 1         | "skeletal muscle fiber development"              | 0.01  | 3.72   | -5.281 | 3.372 |
| GO:004521 |                                                  |       |        |        |       |
| 4         | "sarcomere organization"                         | 0.01  | null   | null   | 3.353 |
| GO:003023 |                                                  |       |        |        |       |
| 9         | "myofibril assembly"                             | 0.017 | null   | null   | 3.572 |
| GO:007099 |                                                  |       |        |        |       |
| 7         | "neuron death"                                   | 0.011 | -0.169 | -1.114 | 3.386 |
| GO:000612 |                                                  |       |        |        |       |
| 3         | "mitochondrial electron transport                |       |        |        |       |
| GO:000612 |                                                  |       |        |        |       |
| 2         | "mitochondrial electron transport                |       |        |        |       |
| GO:004819 |                                                  |       |        |        |       |
| 4         | "Golgi vesicle budding"                          | 0.003 | 4.294  | -2.678 | 2.754 |
| GO:009026 | "positive regulation of canonical Wnt signaling  |       |        |        |       |
| 3         | pathway"                                         | 0.026 | -4.932 | -0.133 | 3.77  |
| GO:005130 |                                                  |       |        |        |       |
| 6         | "mitotic sister chromatid separation"            | 0.003 | 5.622  | -1.738 | 2.875 |
| GO:005130 |                                                  |       |        |        |       |
| 7         | "meiotic chromosome separation"                  | 0.012 | null   | null   | 3.421 |
| GO:004514 |                                                  |       |        |        |       |
| 4         | "meiotic sister chromatid segregation"           | 0.008 | null   | null   | 3.254 |
| GO:000712 |                                                  |       |        |        |       |
| 9         | "homologous chromosome pairing at meiosis"       | 0.019 | null   | null   | 3.63  |
| GO:004544 |                                                  |       |        |        |       |
| 6         | "endothelial cell differentiation"               | 0.015 | 4.329  | -5.2   | 3.518 |
| GO:000991 |                                                  |       |        |        |       |
| 3         | "epidermal cell differentiation"                 | 0.03  | null   | null   | 3.834 |
| GO:004312 | "negative regulation of I-kappaB kinase/NF-      |       |        |        |       |
| 4         | kappaB signaling"                                | 0.009 | -4.77  | -0.431 | 3.298 |
| GO:004312 | "positive regulation of I-kappaB kinase/NF-      |       |        |        |       |
| 3         | kappaB signaling"                                | 0.03  | null   | null   | 3.826 |

|           |                                                       |       |        |        |       |
|-----------|-------------------------------------------------------|-------|--------|--------|-------|
| GO:000808 |                                                       |       |        |        |       |
| 8         | "axo-dendritic transport"                             | 0.012 | -1.998 | -5.467 | 3.426 |
| GO:007238 |                                                       |       |        |        |       |
| 4         | "organelle transport along microtubule"               | 0.018 | null   | null   | 3.6   |
| GO:009884 |                                                       |       |        |        |       |
| 0         | "protein transport along microtubule"                 | 0.03  | null   | null   | 3.83  |
| GO:003573 | "intraciliary transport involved in cilium assembly"  | 0.006 | null   | null   | 3.11  |
| 5         |                                                       |       |        |        |       |
| GO:004207 |                                                       |       |        |        |       |
| 3         | "intraciliary transport"                              | 0.028 | null   | null   | 3.806 |
| GO:003445 |                                                       |       |        |        |       |
| 3         | "microtubule anchoring"                               | 0.012 | 5.733  | -1.815 | 3.443 |
| GO:000282 | "positive regulation of adaptive immune response"     | 0.016 | -4.828 | -0.728 | 3.568 |
| 1         |                                                       |       |        |        |       |
| GO:004354 |                                                       |       |        |        |       |
| 2         | "endothelial cell migration"                          | 0.013 | 1.222  | -5.829 | 3.459 |
| GO:004870 |                                                       |       |        |        |       |
| 9         | "oligodendrocyte differentiation"                     | 0.014 | 3.646  | -5.237 | 3.499 |
| GO:001403 |                                                       |       |        |        |       |
| 2         | "neural crest cell development"                       | 0.022 | 3.648  | -5.427 | 3.691 |
| GO:003362 |                                                       |       |        |        |       |
| 7         | "cell adhesion mediated by integrin"                  | 0.005 | 2.152  | -2.985 | 3.021 |
| GO:003163 |                                                       |       |        |        |       |
| 8         | "zymogen activation"                                  | 0.01  | 4.354  | 4.816  | 3.348 |
| GO:005189 | "positive regulation of protein kinase B signaling"   | 0.017 | -4.796 | -0.227 | 3.575 |
| 7         |                                                       |       |        |        |       |
| GO:200004 | "regulation of G1/S transition of mitotic cell cycle" | 0.027 | null   | null   | 3.778 |
| 5         |                                                       |       |        |        |       |
| GO:004848 |                                                       |       |        |        |       |
| 8         | "synaptic vesicle endocytosis"                        | 0.009 | null   | null   | 3.301 |
| GO:001635 |                                                       |       |        |        |       |
| 8         | "dendrite development"                                | 0.021 | null   | null   | 3.684 |
| GO:000670 |                                                       |       |        |        |       |
| 6         | "steroid catabolic process"                           | 0.007 | null   | null   | 3.185 |
| GO:200124 | "regulation of intrinsic apoptotic signaling pathway" | 0.029 | null   | null   | 3.821 |
| 2         |                                                       |       |        |        |       |
| GO:000715 |                                                       |       |        |        |       |
| 9         | "leukocyte cell-cell adhesion"                        | 0.009 | null   | null   | 3.287 |
| GO:003556 |                                                       |       |        |        |       |
| 7         | "non-canonical Wnt signaling pathway"                 | 0.007 | null   | null   | 3.207 |
| GO:000709 |                                                       |       |        |        |       |
| 8         | "centrosome cycle"                                    | 0.03  | null   | null   | 3.836 |
| GO:003085 |                                                       |       |        |        |       |
| 6         | "regulation of epithelial cell differentiation"       | 0.024 | null   | null   | 3.736 |
| GO:004881 |                                                       |       |        |        |       |
| 3         | "dendrite morphogenesis"                              | 0.012 | null   | null   | 3.445 |
| GO:000804 |                                                       |       |        |        |       |
| 5         | "motor neuron axon guidance"                          | 0.009 | null   | null   | 3.326 |
| GO:003007 |                                                       |       |        |        |       |
| 2         | "peptide hormone secretion"                           | 0.012 | null   | null   | 3.446 |
| GO:001827 |                                                       |       |        |        |       |
| 9         | "protein N-linked glycosylation via asparagine"       | 0.013 | null   | null   | 3.449 |
| GO:000700 |                                                       |       |        |        |       |
| 4         | "telomere maintenance via telomerase"                 | 0.009 | null   | null   | 3.328 |



|            |                                                                                                                             |                 |       |      |       |
|------------|-----------------------------------------------------------------------------------------------------------------------------|-----------------|-------|------|-------|
| GO:0002460 | "adaptive immune response based on somatic recombination of immune receptors built from immunoglobulin superfamily domains" | 0.03            | null  | null | 3.835 |
| GO:0051208 | "sequestering of calcium ion"                                                                                               | 0.001           | null  | null | 2.408 |
| GO:0051279 | "regulation of release of sequestered calcium ion into cytosol"                                                             | 0.011           | null  | null | 3.396 |
| GO:0072583 | "clathrin-dependent endocytosis"                                                                                            | 0.026           | null  | null | 3.765 |
| GO:0042177 | "negative regulation of protein catabolic process"                                                                          | 0.022           | null  | null | 3.702 |
| GO:0051315 | "attachment of mitotic spindle microtubules to kinetochore"                                                                 | 0.011           | null  | null | 3.41  |
| GO:0007266 | "Rho protein signal transduction"                                                                                           | 0.02            | null  | null | 3.663 |
| GO:0010833 | "telomere maintenance via telomere lengthening"                                                                             | 0.015           | null  | null | 3.528 |
| GO:0060070 | "canonical Wnt signaling pathway"                                                                                           | 0.021           | null  | null | 3.677 |
| GO:0030301 | "cholesterol transport"                                                                                                     | 0.017           | null  | null | 3.58  |
| GO:0007173 | "epidermal growth factor receptor signaling pathway"                                                                        | 0.01            | null  | null | 3.334 |
| GO:0030316 | "osteoclast differentiation"                                                                                                | 0.008           | null  | null | 3.256 |
| GO:0006998 | "nuclear envelope organization"                                                                                             | 0.022           | null  | null | 3.692 |
| GO:0048311 | "mitochondrion distribution"                                                                                                | 0.019           | null  | null | 3.629 |
| GO:0051123 | "RNA polymerase II preinitiation complex assembly"                                                                          | 0.009           | null  | null | 3.33  |
| GO:0000289 | "nuclear-transcribed mRNA poly(A) tail shortening"                                                                          | 0.016           | null  | null | 3.548 |
| GO:0008637 | "apoptotic mitochondrial changes"                                                                                           | 0.01            | null  | null | 3.354 |
| GO:0032210 | "regulation of telomere maintenance via telomerase"                                                                         | 0.014           | null  | null | 3.495 |
| GO:0097352 | "autophagosome maturation"                                                                                                  | 0.008           | null  | null | 3.246 |
| GO:0031532 | "actin cytoskeleton reorganization"                                                                                         | 0.021           | null  | null | 3.67  |
| GO:0030866 | "cortical actin cytoskeleton organization"                                                                                  | 0.023           | null  | null | 3.705 |
| GO:0002218 | "activation of innate immune response"                                                                                      | 0.011           | null  | null | 3.386 |
| GO:0007274 | "neuromuscular synaptic transmission"                                                                                       | 0.005           | null  | null | 3.084 |
| GO:0031507 | "heterochromatin assembly"                                                                                                  | 0.022           | null  | null | 3.689 |
| GO:0035249 | "synaptic transmission                                                                                                      | glutamatergic " | 0.006 | null | null  |
| GO:0032007 | "negative regulation of TOR signaling"                                                                                      | 0.023           | null  | null | 3.721 |

|            |                                                            |       |      |      |       |
|------------|------------------------------------------------------------|-------|------|------|-------|
| GO:0045840 | "positive regulation of mitotic nuclear division"          | 0.014 | null | null | 3.494 |
| GO:0043984 | "histone H4-K16 acetylation"                               | 0.005 | null | null | 3.067 |
| GO:0097191 | "extrinsic apoptotic signaling pathway"                    | 0.015 | null | null | 3.534 |
| GO:0002062 | "chondrocyte differentiation"                              | 0.014 | null | null | 3.504 |
| GO:0070527 | "platelet aggregation"                                     | 0.006 | null | null | 3.114 |
| GO:0000727 | "double-strand break repair via break-induced replication" | 0.011 | null | null | 3.395 |
| GO:0050830 | "defense response to Gram-positive bacterium"              | 0.015 | null | null | 3.539 |
| GO:2001259 | "positive regulation of cation channel activity"           | 0.015 | null | null | 3.525 |
| GO:0050829 | "defense response to Gram-negative bacterium"              | 0.015 | null | null | 3.542 |
| GO:0071108 | "protein K48-linked deubiquitination"                      | 0.022 | null | null | 3.69  |
| GO:0045921 | "positive regulation of exocytosis"                        | 0.014 | null | null | 3.494 |
| GO:0045453 | "bone resorption"                                          | 0.004 | null | null | 2.986 |
| GO:0010976 | "positive regulation of neuron projection development"     | 0.018 | null | null | 3.608 |
| GO:0006695 | "cholesterol biosynthetic process"                         | 0.014 | null | null | 3.497 |
| GO:0007212 | "dopamine receptor signaling pathway"                      | 0.01  | null | null | 3.372 |
| GO:0048675 | "axon extension"                                           | 0.01  | null | null | 3.335 |
| GO:0050728 | "negative regulation of inflammatory response"             | 0.021 | null | null | 3.684 |
| GO:0048255 | "mRNA stabilization"                                       | 0.008 | null | null | 3.23  |
| GO:0048259 | "regulation of receptor-mediated endocytosis"              | 0.018 | null | null | 3.609 |
| GO:0050868 | "negative regulation of T cell activation"                 | 0.019 | null | null | 3.632 |
| GO:0071222 | "cellular response to lipopolysaccharide"                  | 0.024 | null | null | 3.732 |
| GO:0046632 | "alpha-beta T cell differentiation"                        | 0.011 | null | null | 3.379 |
| GO:0046579 | "positive regulation of Ras protein signal transduction"   | 0.014 | null | null | 3.49  |
| GO:0010811 | "positive regulation of cell-substrate adhesion"           | 0.021 | null | null | 3.668 |
| GO:0000422 | "autophagy of mitochondrion"                               | 0.023 | null | null | 3.709 |
| GO:0001947 | "heart looping"                                            | 0.019 | null | null | 3.623 |
| GO:0030218 | "erythrocyte differentiation"                              | 0.028 | null | null | 3.799 |

|            |                                                                                         |                        |      |      |       |
|------------|-----------------------------------------------------------------------------------------|------------------------|------|------|-------|
| GO:0046651 | "lymphocyte proliferation"                                                              | 0.012                  | null | null | 3.445 |
| GO:0031936 | "negative regulation of chromatin silencing"                                            | 0.008                  | null | null | 3.256 |
| GO:0008630 | "intrinsic apoptotic signaling pathway in response to DNA damage"                       | 0.014                  | null | null | 3.499 |
| GO:0051966 | "regulation of synaptic transmission"                                                   | glutamatergic<br>0.007 | null | null | null  |
| GO:2000780 | "negative regulation of double-strand break repair"                                     | 0.007                  | null | null | 3.224 |
| GO:0046580 | "negative regulation of Ras protein signal transduction"                                | 0.017                  | null | null | 3.588 |
| GO:0007043 | "cell-cell junction assembly"                                                           | 0.027                  | null | null | 3.79  |
| GO:0050772 | "positive regulation of axonogenesis"                                                   | 0.012                  | null | null | 3.417 |
| GO:0036158 | "outer dynein arm assembly"                                                             | 0.005                  | null | null | 3.015 |
| GO:0043149 | "stress fiber assembly"                                                                 | 0.003                  | null | null | 2.829 |
| GO:0030183 | "B cell differentiation"                                                                | 0.017                  | null | null | 3.575 |
| GO:0051453 | "regulation of intracellular pH"                                                        | 0.026                  | null | null | 3.761 |
| GO:0071356 | "cellular response to tumor necrosis factor"                                            | 0.028                  | null | null | 3.795 |
| GO:0008584 | "male gonad development"                                                                | 0.02                   | null | null | 3.644 |
| GO:2001237 | "negative regulation of extrinsic apoptotic signaling pathway"                          | 0.016                  | null | null | 3.552 |
| GO:0051928 | "positive regulation of calcium ion transport"                                          | 0.016                  | null | null | 3.566 |
| GO:0031623 | "receptor internalization"                                                              | 0.011                  | null | null | 3.394 |
| GO:0060236 | "regulation of mitotic spindle organization"                                            | 0.014                  | null | null | 3.485 |
| GO:0006627 | "protein processing involved in protein targeting to mitochondrion"                     | 0.016                  | null | null | 3.553 |
| GO:0002708 | "positive regulation of lymphocyte mediated immunity"                                   | 0.017                  | null | null | 3.587 |
| GO:0042771 | "intrinsic apoptotic signaling pathway in response to DNA damage by p53 class mediator" | 0.006                  | null | null | 3.121 |
| GO:0051560 | "mitochondrial calcium ion homeostasis"                                                 | 0.017                  | null | null | 3.591 |
| GO:0006896 | "Golgi to vacuole transport"                                                            | 0.015                  | null | null | 3.542 |
| GO:0046464 | "acylglycerol catabolic process"                                                        | 0.007                  | null | null | 3.208 |
| GO:0048489 | "synaptic vesicle transport"                                                            | 0.007                  | null | null | 3.187 |
| GO:0034198 | "cellular response to amino acid starvation"                                            | 0.016                  | null | null | 3.547 |

|            |                                                                  |                              |       |      |       |
|------------|------------------------------------------------------------------|------------------------------|-------|------|-------|
| GO:0014065 | "phosphatidylinositol 3-kinase signaling"                        | 0.009                        | null  | null | 3.323 |
| GO:1990126 | "retrograde transport"                                           | endosome to plasma membrane" | 0.006 | null | null  |
| GO:0034446 | "substrate adhesion-dependent cell spreading"                    | 0.01                         | null  | null | 3.373 |
| GO:0030509 | "BMP signaling pathway"                                          | 0.018                        | null  | null | 3.615 |
| GO:0035023 | "regulation of Rho protein signal transduction"                  | 0.029                        | null  | null | 3.814 |
| GO:0030199 | "collagen fibril organization"                                   | 0.01                         | null  | null | 3.35  |
| GO:0097193 | "intrinsic apoptotic signaling pathway"                          | 0.03                         | null  | null | 3.823 |
| GO:0042113 | "B cell activation"                                              | 0.025                        | null  | null | 3.759 |
| GO:0047496 | "vesicle transport along microtubule"                            | 0.009                        | null  | null | 3.32  |
| GO:0000132 | "establishment of mitotic spindle orientation"                   | 0.014                        | null  | null | 3.485 |
| GO:0002366 | "leukocyte activation involved in immune response"               | 0.027                        | null  | null | 3.788 |
| GO:0050714 | "positive regulation of protein secretion"                       | 0.02                         | null  | null | 3.647 |
| GO:0046928 | "regulation of neurotransmitter secretion"                       | 0.015                        | null  | null | 3.533 |
| GO:0060047 | "heart contraction"                                              | 0.019                        | null  | null | 3.625 |
| GO:0007416 | "synapse assembly"                                               | 0.018                        | null  | null | 3.601 |
| GO:0030518 | "intracellular steroid hormone receptor signaling pathway"       | 0.01                         | null  | null | 3.333 |
| GO:0007269 | "neurotransmitter secretion"                                     | 0.029                        | null  | null | 3.819 |
| GO:2001243 | "negative regulation of intrinsic apoptotic signaling pathway"   | 0.018                        | null  | null | 3.607 |
| GO:0017121 | "plasma membrane phospholipid scrambling"                        | 0.019                        | null  | null | 3.627 |
| GO:0007179 | "transforming growth factor beta receptor signaling pathway"     | 0.026                        | null  | null | 3.765 |
| GO:0051092 | "positive regulation of NF-kappaB transcription factor activity" | 0.027                        | null  | null | 3.787 |
| GO:0008543 | "fibroblast growth factor receptor signaling pathway"            | 0.027                        | null  | null | 3.78  |
| GO:0000187 | "activation of MAPK activity"                                    | 0.022                        | null  | null | 3.703 |
| GO:0090307 | "mitotic spindle assembly"                                       | 0.017                        | null  | null | 3.577 |
| GO:2001235 | "positive regulation of apoptotic signaling pathway"             | 0.023                        | null  | null | 3.715 |
| GO:0000712 | "resolution of meiotic recombination intermediates"              | 0.01                         | null  | null | 3.36  |

|            |                                                                                             |       |                            |       |       |
|------------|---------------------------------------------------------------------------------------------|-------|----------------------------|-------|-------|
| GO:0050806 | "positive regulation of synaptic transmission"                                              | 0.019 | null                       | null  | 3.628 |
| GO:0031110 | "regulation of microtubule polymerization or depolymerization"                              | 0.027 | null                       | null  | 3.777 |
| GO:0045954 | "positive regulation of natural killer cell mediated cytotoxicity"                          | 0.004 | null                       | null  | 2.978 |
| GO:0006939 | "smooth muscle contraction"                                                                 | 0.013 | null                       | null  | 3.455 |
| GO:0045582 | "positive regulation of T cell differentiation"                                             | 0.014 | null                       | null  | 3.51  |
| GO:2001238 | "positive regulation of extrinsic apoptotic signaling pathway"                              | 0.009 | null                       | null  | 3.316 |
| GO:0042102 | "positive regulation of T cell proliferation"                                               | 0.015 | null                       | null  | 3.523 |
| GO:0043407 | "negative regulation of MAP kinase activity"                                                | 0.023 | null from or within Golgi" | null  | 3.723 |
| GO:0048199 | "vesicle targeting to                                                                       |       |                            | 0.014 | null  |
| GO:0051283 | "negative regulation of sequestering of calcium ion"                                        | 0.017 | null                       | null  | 3.591 |
| GO:0043001 | "Golgi to plasma membrane protein transport"                                                | 0.013 | null                       | null  | 3.451 |
| GO:0046475 | "glycerophospholipid catabolic process"                                                     | 0.013 | null                       | null  | 3.45  |
| GO:1902808 | "positive regulation of cell cycle G1/S phase transition"                                   | 0.01  | null                       | null  | 3.341 |
| GO:0002891 | "positive regulation of immunoglobulin mediated immune response"                            | 0.007 | null                       | null  | 3.169 |
| GO:0002705 | "positive regulation of leukocyte mediated immunity"                                        | 0.02  | null                       | null  | 3.647 |
| GO:0048167 | "regulation of synaptic plasticity"                                                         | 0.029 | null                       | null  | 3.813 |
| GO:0043280 | "positive regulation of cysteine-type endopeptidase activity involved in apoptotic process" | 0.022 | null                       | null  | 3.692 |
| GO:0030168 | "platelet activation"                                                                       | 0.015 | null                       | null  | 3.536 |
| GO:0051298 | "centrosome duplication"                                                                    | 0.016 | null                       | null  | 3.56  |
| GO:0030968 | "endoplasmic reticulum unfolded protein response"                                           | 0.024 | null                       | null  | 3.741 |
| GO:0002286 | "T cell activation involved in immune response"                                             | 0.01  | null                       | null  | 3.359 |
| GO:0051209 | "release of sequestered calcium ion into cytosol"                                           | 0.017 | null                       | null  | 3.585 |
| GO:0071456 | "cellular response to hypoxia"                                                              | 0.017 | null                       | null  | 3.586 |
| GO:0045766 | "positive regulation of angiogenesis"                                                       | 0.026 | null                       | null  | 3.773 |
| GO:0032869 | "cellular response to insulin stimulus"                                                     | 0.028 | null                       | null  | 3.794 |

|            |                                                                                    |       |      |      |       |
|------------|------------------------------------------------------------------------------------|-------|------|------|-------|
| GO:0060048 | "cardiac muscle contraction"                                                       | 0.011 | null | null | 3.404 |
| GO:0006919 | "activation of cysteine-type endopeptidase activity involved in apoptotic process" | 0.014 | null | null | 3.503 |
| GO:0090277 | "positive regulation of peptide hormone secretion"                                 | 0.014 | null | null | 3.492 |
| GO:0051250 | "negative regulation of lymphocyte activation"                                     | 0.025 | null | null | 3.75  |
| GO:0030073 | "insulin secretion"                                                                | 0.009 | null | null | 3.303 |
| GO:0016079 | "synaptic vesicle exocytosis"                                                      | 0.016 | null | null | 3.559 |
| GO:0042098 | "T cell proliferation"                                                             | 0.007 | null | null | 3.179 |
| GO:2000042 | "negative regulation of double-strand break repair via homologous recombination"   | 0.005 | null | null | 3.02  |
| GO:0002695 | "negative regulation of leukocyte activation"                                      | 0.03  | null | null | 3.828 |
