# Supplementary material for: Platelet-Rich Fibrin Increases BMP2 Expression in Oral Fibroblasts via Activation of TGF-β Signaling
Source: MDPI journal article supplement (doi:10.3390/ijms22157935), 2021-07-25
Supplement: s1 [file s1]

Table S1: List of the gene IDs obtained by PANTHER analysis.

| Gene ID                              | Gene name                                                                | Protein class                                              |
|--------------------------------------|--------------------------------------------------------------------------|------------------------------------------------------------|
| HUMAN HGNC=17955 UniProtKB=O43504    | Ragulator complex protein<br>LAMTOR5;LAMTOR5;ortholog                    |                                                            |
| HUMAN HGNC=708 UniProtKB=O15511      | Actin-related protein 2/3 complex subunit<br>5;ARPC5;ortholog            | actin or actin-binding<br>cytoskeletal<br>protein(PC00041) |
| HUMAN HGNC=316 UniProtKB=P43652      | Afamin;AFM;ortholog                                                      | transfer/carrier<br>protein(PC00219)                       |
| HUMAN HGNC=10046 UniProtKB=P12724    | Eosinophil cationic protein;RNASE3;ortholog                              |                                                            |
| HUMAN HGNC=15578 UniProtKB=Q96D71    | RalBP1-associated Eps domain-containing protein<br>1;REPS1;ortholog      | membrane traffic<br>protein(PC00150)                       |
| HUMAN HGNC=6702 UniProtKB=Q32MZ4     | Leucine-rich repeat flightless-interacting protein<br>1;LRRFIP1;ortholog | DNA-binding transcription<br>factor(PC00218)               |
| HUMAN HGNC=5527 UniProtKB=P01860     | Immunoglobulin heavy constant gamma<br>3;IGHG3;ortholog                  | immunoglobulin(PC00123)                                    |
| HUMAN HGNC=2315 UniProtKB=Q96FN4     | Copine-2;CPNE2;ortholog                                                  |                                                            |
| HUMAN HGNC=2095 UniProtKB=P10909     | Clusterin;CLU;ortholog                                                   |                                                            |
| HUMAN HGNC=12822 UniProtKB=Q9NQW7    | Xaa-Pro aminopeptidase 1;XPNPEP1;ortholog                                | protease(PC00190)                                          |
| HUMAN HGNC=30391 UniProtKB=Q9UG01    | Intraflagellar transport protein 172<br>homolog;IFT172;ortholog          | structural<br>protein(PC00211)                             |
| HUMAN HGNC=5879 UniProtKB=P01699     | Immunoglobulin lambda variable 1-44;IGLV1-<br>44;ortholog                | immunoglobulin(PC00123)                                    |
| HUMAN HGNC=20406 UniProtKB=P48668    | Keratin, type II cytoskeletal 6C;KRT6C;ortholog                          |                                                            |
| HUMAN HGNC=616 UniProtKB=P02749      | Beta-2-glycoprotein 1;APOH;ortholog                                      |                                                            |
| HUMAN HGNC=30032 UniProtKB=Q6VY07    | Phosphofurin acidic cluster sorting protein<br>1;PACS1;ortholog          |                                                            |
| HUMAN HGNC=9852 UniProtKB=O95373     | Importin-7;IPO7;ortholog                                                 | transporter(PC00227)                                       |
| HUMAN HGNC=7446 UniProtKB=Q9Y4I5     | Tesmin;TESMIN;ortholog                                                   |                                                            |
| HUMAN HGNC=15523 UniProtKB=Q9Y2W7    | Calsenilin;KCNIP3;ortholog                                               |                                                            |
| HUMAN HGNC=2873 UniProtKB=P00387     | NADH-cytochrome b5 reductase 3;CYB5R3;ortholog                           | reductase(PC00198)                                         |
| HUMAN HGNC=13109 UniProtKB=P17038    | Zinc finger protein 43;ZNF43;ortholog                                    | C2H2 zinc finger<br>transcription<br>factor(PC00248)       |
| HUMAN HGNC=28648 UniProtKB=Q8IYB7    | DIS3-like exonuclease 2;DIS3L2;ortholog                                  | exoribonuclease(PC00099)                                   |
| HUMAN HGNC=5241 UniProtKB=P11142     | Heat shock cognate 71 kDa protein;HSPA8;ortholog                         |                                                            |
| HUMAN HGNC=17860 UniProtKB=Q8NC51    | Plasminogen activator inhibitor 1 RNA-binding<br>protein;SERBP1;ortholog | RNA metabolism<br>protein(PC00031)                         |
| HUMAN HGNC=5647 UniProtKB=A0A087WSY4 | Immunoglobulin heavy variable 4-30-2;IGHV4-30-<br>2;ortholog             | immunoglobulin(PC00123)                                    |

|                                      |                                                                    |                                                       |
|--------------------------------------|--------------------------------------------------------------------|-------------------------------------------------------|
| HUMAN HGNC=8587 UniProtKB=P22234     | Multifunctional protein ADE2;PAICS;ortholog                        |                                                       |
| HUMAN HGNC=9456 UniProtKB=P07225     | Vitamin K-dependent protein S;PROS1;ortholog                       |                                                       |
| HUMAN HGNC=5624 UniProtKB=A0A0B4J1X5 | Immunoglobulin heavy variable 3-74;IGHV3-74;ortholog               | immunoglobulin(PC00123)                               |
| HUMAN HGNC=9536 UniProtKB=Q14818     | Proteasome subunit alpha type-7;PSMA7;ortholog                     | protease(PC00190)                                     |
| HUMAN HGNC=1481 UniProtKB=P04632     | Calpain small subunit 1;CAPNS1;ortholog                            |                                                       |
| HUMAN HGNC=9878 UniProtKB=Q95267     | RAS guanyl-releasing protein 1;RASGRP1;ortholog                    | guanyl-nucleotide exchange factor(PC00113)            |
| HUMAN HGNC=20331 UniProtKB=Q14644    | Ras GTPase-activating protein 3;RASA3;ortholog                     | GTPase-activating protein(PC00257)                    |
| HUMAN HGNC=11124 UniProtKB=P55854    | Small ubiquitin-related modifier 3;SUMO3;ortholog                  |                                                       |
| HUMAN HGNC=6413 UniProtKB=P13645     | Keratin, type I cytoskeletal 10;KRT10;ortholog                     |                                                       |
| HUMAN HGNC=11027 UniProtKB=P02730    | Band 3 anion transport protein;SLC4A1;ortholog                     | secondary carrier transporter(PC00258)                |
| HUMAN HGNC=4634 UniProtKB=P28161     | Glutathione S-transferase Mu 2;GSTM2;ortholog                      | transferase(PC00220)                                  |
| HUMAN HGNC=7178 UniProtKB=Q13201     | Multimerin-1;MMRN1;ortholog                                        |                                                       |
| HUMAN HGNC=1101 UniProtKB=P51587     | Breast cancer type 2 susceptibility protein;BRCA2;ortholog         | damaged DNA-binding protein(PC00086)                  |
| HUMAN HGNC=1540 UniProtKB=P08185     | Corticosteroid-binding globulin;SERPINA6;ortholog                  | protease inhibitor(PC00191)                           |
| HUMAN HGNC=28450 UniProtKB=Q8NC44    | Reticulophagy regulator 2;RETREG2;ortholog                         |                                                       |
| HUMAN HGNC=4381 UniProtKB=Q14344     | Guanine nucleotide-binding protein subunit alpha-13;GNA13;ortholog | heterotrimeric G-protein(PC00117)                     |
| HUMAN HGNC=5877 UniProtKB=P01703     | Immunoglobulin lambda variable 1-40;IGLV1-40;ortholog              | immunoglobulin(PC00123)                               |
| HUMAN HGNC=10252 UniProtKB=O75116    | Rho-associated protein kinase 2;ROCK2;ortholog                     | non-receptor serine/threonine protein kinase(PC00167) |
| HUMAN HGNC=3528 UniProtKB=P00742     | Coagulation factor X;F10;ortholog                                  | serine protease(PC00203)                              |
| HUMAN HGNC=3338 UniProtKB=Q14247     | Src substrate cortactin;CTTN;ortholog                              | non-motor actin binding protein(PC00165)              |
| HUMAN HGNC=10496 UniProtKB=P06703    | Protein S100-A6;S100A6;ortholog                                    | calmodulin-related(PC00061)                           |
| HUMAN HGNC=11138 UniProtKB=P37840    | Alpha-synuclein;SNCA;ortholog                                      | membrane trafficking regulatory protein(PC00151)      |
| HUMAN HGNC=5213 UniProtKB=P51659     | Peroxisomal multifunctional enzyme type 2;HSD17B4;ortholog         |                                                       |
| HUMAN HGNC=17598 UniProtKB=Q9Y385    | Ubiquitin-conjugating enzyme E2 J1;UBE2J1;ortholog                 | ubiquitin-protein ligase(PC00234)                     |
| HUMAN HGNC=2753 UniProtKB=Q16698     | 2,4-dienoyl-CoA reductase, mitochondrial;DECR1;ortholog            | oxidoreductase(PC00176)                               |

|                                       |                                                                                               |                                                              |
|---------------------------------------|-----------------------------------------------------------------------------------------------|--------------------------------------------------------------|
| HUMAN HGNC=30765 UniProtKB=Q9UKE5     | TRAF2 and NCK-interacting protein kinase;TNK1;ortholog                                        | non-receptor serine/threonine protein kinase(PC00167)        |
| HUMAN HGNC=8508 UniProtKB=O95747      | Serine/threonine-protein kinase OSR1;OXS1;ortholog                                            |                                                              |
| HUMAN HGNC=12009 UniProtKB=P60174     | Triosephosphate isomerase;TPI1;ortholog                                                       | isomerase(PC00135)                                           |
| HUMAN HGNC=13937 UniProtKB=O95866     | Megakaryocyte and platelet inhibitory receptor G6b;MPIG6B;ortholog                            | transmembrane signal receptor(PC00197)                       |
| HUMAN HGNC=14637 UniProtKB=Q86UK0     | ATP-binding cassette sub-family A member 12;ABCA12;ortholog                                   | ATP-binding cassette (ABC) transporter(PC00003)              |
| HUMAN HGNC=845 UniProtKB=O75947       | ATP synthase subunit d, mitochondrial;ATP5PD;ortholog                                         | ATP synthase(PC00002)                                        |
| HUMAN HGNC=3231 UniProtKB=Q9HCU4      | Cadherin EGF LAG seven-pass G-type receptor 2;CELSR2;ortholog                                 | cadherin(PC00057)                                            |
| HUMAN HGNC=10666 UniProtKB=Q9Y365     | START domain-containing protein 10;STARD10;ortholog                                           |                                                              |
| HUMAN HGNC=10534 UniProtKB=Q9NR31     | GTP-binding protein SAR1a;SAR1A;ortholog                                                      |                                                              |
| HUMAN HGNC=8127 UniProtKB=O15294      | UDP-N-acetylglucosamine--peptide N-acetylglucosaminyltransferase 110 kDa subunit;OGT;ortholog | protein modifying enzyme(PC00260)                            |
| HUMAN HGNC=12612 UniProtKB=P54578     | Ubiquitin carboxyl-terminal hydrolase 14;USP14;ortholog                                       | cysteine protease(PC00081)                                   |
| HUMAN HGNC=4243 UniProtKB=P56159      | GDNF family receptor alpha-1;GFRA1;ortholog                                                   | transmembrane signal receptor(PC00197)                       |
| HUMAN HGNC=31797 UniProtKB=P0C7V6     | Putative transcription factor SPT20 homolog-like 2;SUPT20HL2;ortholog                         | chromatin/chromatin-binding, or -regulatory protein(PC00077) |
| HUMAN HGNC=29351 UniProtKB=Q9C0H5     | Rho GTPase-activating protein 39;ARHGAP39;ortholog                                            |                                                              |
| HUMAN HGNC=5645 UniProtKB=A0A0C4DH34  | Immunoglobulin heavy variable 4-28;IGHV4-28;ortholog                                          | immunoglobulin(PC00123)                                      |
| HUMAN HGNC=15861 UniProtKB=Q9H5Z1     | Probable ATP-dependent RNA helicase DHX35;DHX35;ortholog                                      | RNA helicase(PC00032)                                        |
| HUMAN HGNC=4620 UniProtKB=P06396      | Gelsolin;GSN;ortholog                                                                         | non-motor actin binding protein(PC00165)                     |
| HUMAN HGNC=2552 UniProtKB=Q13617      | Cullin-2;CUL2;ortholog                                                                        | ubiquitin-protein ligase(PC00234)                            |
| HUMAN HGNC=9086 UniProtKB=P60201      | Myelin proteolipid protein;PLP1;ortholog                                                      | myelin protein(PC00161)                                      |
| HUMAN HGNC=12088 UniProtKB=A0A075B6Z2 | T cell receptor alpha joining 56;TRAJ56;ortholog                                              |                                                              |
| HUMAN HGNC=9065 UniProtKB=P19174      | 1-phosphatidylinositol 4,5-bisphosphate phosphodiesterase gamma-1;PLCG1;ortholog              | phospholipase(PC00186)                                       |
| HUMAN HGNC=5157 UniProtKB=P00492      | Hypoxanthine-guanine phosphoribosyltransferase;HPRT1;ortholog                                 | glycosyltransferase(PC00111)                                 |
| HUMAN HGNC=9164 UniProtKB=Q99719      | Septin-5;SEPTIN5;ortholog                                                                     | cytoskeletal protein(PC00085)                                |
| HUMAN HGNC=29233 UniProtKB=Q7Z434     | Mitochondrial antiviral-signaling protein;MAVS;ortholog                                       |                                                              |
| HUMAN HGNC=6891 UniProtKB=Q15555      | Microtubule-associated protein RP/EB family member 2;MAPRE2;ortholog                          | non-motor microtubule binding protein(PC00166)               |

|                                      |                                                                                |                                                       |
|--------------------------------------|--------------------------------------------------------------------------------|-------------------------------------------------------|
| HUMAN HGNC=199 UniProtKB=O43506      | Disintegrin and metalloproteinase domain-containing protein 20;ADAM20;ortholog | metalloprotease(PC00153)                              |
| HUMAN HGNC=5636 UniProtKB=A0A075B7B8 | IGv domain-containing protein;IGHV3OR16-12;ortholog                            | immunoglobulin(PC00123)                               |
| HUMAN HGNC=12585 UniProtKB=P31930    | Cytochrome b-c1 complex subunit 1, mitochondrial;UQCRC1;ortholog               | metalloprotease(PC00153)                              |
| HUMAN HGNC=6835 UniProtKB=P78559     | Microtubule-associated protein 1A;MAP1A;ortholog                               | non-motor microtubule binding protein(PC00166)        |
| HUMAN HGNC=29162 UniProtKB=Q96BN6    | Protein FAM149B1;FAM149B1;ortholog                                             |                                                       |
| HUMAN HGNC=1617 UniProtKB=P50991     | T-complex protein 1 subunit delta;CCT4;ortholog                                | chaperonin(PC00073)                                   |
| HUMAN HGNC=12468 UniProtKB=P0CG48    | Polyubiquitin-C;UBC;ortholog                                                   |                                                       |
| HUMAN HGNC=24224 UniProtKB=Q9NYY4    | Cyclin-dependent kinase 12;CDK12;ortholog                                      | non-receptor serine/threonine protein kinase(PC00167) |
| HUMAN HGNC=6767 UniProtKB=Q15797     | Mothers against decapentaplegic homolog 1;SMAD1;ortholog                       | DNA-binding transcription factor(PC00218)             |
| HUMAN HGNC=12666 UniProtKB=P55072    | Transitional endoplasmic reticulum ATPase;VCP;ortholog                         |                                                       |
| HUMAN HGNC=17808 UniProtKB=Q9UPT8    | Zinc finger CCCH domain-containing protein 4;ZC3H4;ortholog                    | zinc finger transcription factor(PC00244)             |
| HUMAN HGNC=8823 UniProtKB=P16284     | Platelet endothelial cell adhesion molecule;PECAM1;ortholog                    | immunoglobulin receptor superfamily(PC00124)          |
| HUMAN HGNC=543 UniProtKB=P08758      | Annexin A5;ANXA5;ortholog                                                      | calcium-binding protein(PC00060)                      |
| HUMAN HGNC=9539 UniProtKB=P49721     | Proteasome subunit beta type-2;PSMB2;ortholog                                  | protease(PC00190)                                     |
| HUMAN HGNC=25758 UniProtKB=Q8TED0    | U3 small nucleolar RNA-associated protein 15 homolog;UTP15;ortholog            | RNA processing factor(PC00147)                        |
| HUMAN HGNC=6137 UniProtKB=P17301     | Integrin alpha-2;ITGA2;ortholog                                                | integrin(PC00126)                                     |
| HUMAN HGNC=30138 UniProtKB=Q8N131    | Porimin;TMEM123;ortholog                                                       |                                                       |
| HUMAN HGNC=8927 UniProtKB=Q93100     | Phosphorylase b kinase regulatory subunit beta;PHKB;ortholog                   | kinase activator(PC00138)                             |
| HUMAN HGNC=8783 UniProtKB=Q08499     | cAMP-specific 3',5'-cyclic phosphodiesterase 4D;PDE4D;ortholog                 | phosphodiesterase(PC00185)                            |
| HUMAN HGNC=9571 UniProtKB=Q92530     | Proteasome inhibitor PI31 subunit;PSMF1;ortholog                               | protease inhibitor(PC00191)                           |
| HUMAN HGNC=3218 UniProtKB=Q12805     | EGF-containing fibulin-like extracellular matrix protein 1;EFEMP1;ortholog     | extracellular matrix structural protein(PC00103)      |
| HUMAN HGNC=23479 UniProtKB=Q96BY6    | Dedicator of cytokinesis protein 10;DOCK10;ortholog                            | guanyl-nucleotide exchange factor(PC00113)            |
| HUMAN HGNC=9969 UniProtKB=P35251     | Replication factor C subunit 1;RFC1;ortholog                                   | DNA metabolism protein(PC00009)                       |
| HUMAN HGNC=23074 UniProtKB=Q9NX70    | Mediator of RNA polymerase II transcription subunit 29;MED29;ortholog          | general transcription factor(PC00259)                 |
| HUMAN HGNC=5048 UniProtKB=Q00839     | Heterogeneous nuclear ribonucleoprotein U;HNRNPU;ortholog                      |                                                       |
| HUMAN HGNC=4922 UniProtKB=P19367     | Hexokinase-1;HK1;ortholog                                                      | kinase(PC00137)                                       |

|                                   |                                                                                             |                                            |
|-----------------------------------|---------------------------------------------------------------------------------------------|--------------------------------------------|
| HUMAN HGNC=9459 UniProtKB=Q92786  | Prospero homeobox protein 1;PROX1;ortholog                                                  | homeodomain transcription factor(PC00119)  |
| HUMAN HGNC=8548 UniProtKB=P07237  | Protein disulfide-isomerase;P4HB;ortholog                                                   | chaperone(PC00072)                         |
| HUMAN HGNC=545 UniProtKB=P20073   | Annexin A7;ANXA7;ortholog                                                                   | calcium-binding protein(PC00060)           |
| HUMAN HGNC=6441 UniProtKB=P19013  | Keratin, type II cytoskeletal 4;KRT4;ortholog                                               |                                            |
| HUMAN HGNC=10467 UniProtKB=Q16799 | Reticulon-1;RTN1;ortholog                                                                   |                                            |
| HUMAN HGNC=14674 UniProtKB=Q96QU1 | Protocadherin-15;PCDH15;ortholog                                                            | cadherin(PC00057)                          |
| HUMAN HGNC=12379 UniProtKB=Q15631 | Translin;TSN;ortholog                                                                       |                                            |
| HUMAN HGNC=9756 UniProtKB=O00391  | Sulfhydryl oxidase 1;QSOX1;ortholog                                                         | oxidase(PC00175)                           |
| HUMAN HGNC=18018 UniProtKB=Q8IX18 | Probable ATP-dependent RNA helicase DHX40;DHX40;ortholog                                    | RNA helicase(PC00032)                      |
| HUMAN HGNC=7717 UniProtKB=P19404  | NADH dehydrogenase [ubiquinone] flavoprotein 2, mitochondrial;NDUFV2;ortholog               | dehydrogenase(PC00092)                     |
| HUMAN HGNC=7618 UniProtKB=O14974  | Protein phosphatase 1 regulatory subunit 12A;PPP1R12A;ortholog                              | phosphatase modulator(PC00184)             |
| HUMAN HGNC=26614 UniProtKB=Q8NB46 | Serine/threonine-protein phosphatase 6 regulatory ankyrin repeat subunit C;ANKRD52;ortholog | scaffold/adaptor protein(PC00226)          |
| HUMAN HGNC=5834 UniProtKB=P06312  | Immunoglobulin kappa variable 4-1;IGKV4-1;ortholog                                          | immunoglobulin(PC00123)                    |
| HUMAN HGNC=15663 UniProtKB=Q9NYU2 | UDP-glucose:glycoprotein glucosyltransferase 1;UGGT1;ortholog                               | glycosyltransferase(PC00111)               |
| HUMAN HGNC=11476 UniProtKB=O15260 | Surfeit locus protein 4;SURF4;ortholog                                                      | chaperone(PC00072)                         |
| HUMAN HGNC=32153 UniProtKB=A6NM43 | Putative T-complex protein 1 subunit theta-like 1;CCT8L1P;ortholog                          | chaperonin(PC00073)                        |
| HUMAN HGNC=30456 UniProtKB=Q96DA0 | Zymogen granule protein 16 homolog B;ZG16B;ortholog                                         |                                            |
| HUMAN HGNC=11572 UniProtKB=P26639 | Threonine--tRNA ligase 1, cytoplasmic;TARS1;ortholog                                        | aminoacyl-tRNA synthetase(PC00047)         |
| HUMAN HGNC=243 UniProtKB=P35611   | Alpha-adducin;ADD1;ortholog                                                                 | non-motor actin binding protein(PC00165)   |
| HUMAN HGNC=15607 UniProtKB=Q14155 | Rho guanine nucleotide exchange factor 7;ARHGEF7;ortholog                                   | guanyl-nucleotide exchange factor(PC00113) |
| HUMAN HGNC=823 UniProtKB=P25705   | ATP synthase subunit alpha, mitochondrial;ATP5F1A;ortholog                                  | ATP synthase(PC00002)                      |
| HUMAN HGNC=29011 UniProtKB=O15050 | TPR and ankyrin repeat-containing protein 1;TRANK1;ortholog                                 |                                            |
| HUMAN HGNC=4127 UniProtKB=Q7Z7M9  | Polypeptide N-acetylgalactosaminyltransferase 5;GALNT5;ortholog                             | glycosyltransferase(PC00111)               |
| HUMAN HGNC=317 UniProtKB=P02771   | Alpha-fetoprotein;AFP;ortholog                                                              | transfer/carrier protein(PC00219)          |
| HUMAN HGNC=19296 UniProtKB=Q9UF33 | Ephrin type-A receptor 6;EPHA6;ortholog                                                     | transmembrane signal receptor(PC00197)     |
| HUMAN HGNC=2312 UniProtKB=P15169  | Carboxypeptidase N catalytic chain;CPN1;ortholog                                            | protease(PC00190)                          |

|                                   |                                                                  |                                              |
|-----------------------------------|------------------------------------------------------------------|----------------------------------------------|
| HUMAN HGNC=23787 UniProtKB=Q9P1W3 | Calcium permeable stress-gated cation channel 1;TMEM63C;ortholog |                                              |
| HUMAN HGNC=25694 UniProtKB=Q8TC07 | TBC1 domain family member 15;TBC1D15;ortholog                    | GTPase-activating protein(PC00257)           |
| HUMAN HGNC=20076 UniProtKB=Q96K76 | Ubiquitin carboxyl-terminal hydrolase 47;USP47;ortholog          | cysteine protease(PC00081)                   |
| HUMAN HGNC=25631 UniProtKB=Q96MT7 | Cilia- and flagella-associated protein 44;CFAP44;ortholog        |                                              |
| HUMAN HGNC=7228 UniProtKB=P22897  | Macrophage mannose receptor 1;MRC1;ortholog                      |                                              |
| HUMAN HGNC=4747 UniProtKB=P58876  | Histone H2B type 1-D;H2BC5;ortholog                              | histone(PC00118)                             |
| HUMAN HGNC=28972 UniProtKB=Q8IX22 | Zinc finger CCCH domain-containing protein 3;ZC3H3;ortholog      |                                              |
| HUMAN HGNC=12407 UniProtKB=P68366 | Tubulin alpha-4A chain;TUBA4A;ortholog                           | tubulin(PC00228)                             |
| HUMAN HGNC=11283 UniProtKB=P12931 | Proto-oncogene tyrosine-protein kinase Src;SRC;ortholog          |                                              |
| HUMAN HGNC=2974 UniProtKB=P50570  | Dynamin-2;DNM2;ortholog                                          | membrane traffic protein(PC00150)            |
| HUMAN HGNC=9240 UniProtKB=P02775  | Platelet basic protein;PPBP;ortholog                             | chemokine(PC00074)                           |
| HUMAN HGNC=13420 UniProtKB=Q86TP1 | Exopolyphosphatase PRUNE1;PRUNE1;ortholog                        |                                              |
| HUMAN HGNC=1630 UniProtKB=P48509  | CD151 antigen;CD151;ortholog                                     |                                              |
| HUMAN HGNC=7670 UniProtKB=Q9Y6Q9  | Nuclear receptor coactivator 3;NCOA3;ortholog                    | histone modifying enzyme(PC00261)            |
| HUMAN HGNC=13406 UniProtKB=Q9Y6V0 | Protein piccolo;PCLO;ortholog                                    |                                              |
| HUMAN HGNC=535 UniProtKB=P50995   | Annexin A11;ANXA11;ortholog                                      | calcium-binding protein(PC00060)             |
| HUMAN HGNC=21013 UniProtKB=Q6UX71 | Plexin domain-containing protein 2;PLXDC2;ortholog               |                                              |
| HUMAN HGNC=14261 UniProtKB=Q9NS28 | Regulator of G-protein signaling 18;RGS18;ortholog               | GTPase-activating protein(PC00257)           |
| HUMAN HGNC=2905 UniProtKB=O14490  | Disks large-associated protein 1;DLGAP1;ortholog                 | scaffold/adaptor protein(PC00226)            |
| HUMAN HGNC=9141 UniProtKB=Q15126  | Phosphomevalonate kinase;PMVK;ortholog                           | kinase(PC00137)                              |
| HUMAN HGNC=4443 UniProtKB=P40197  | Platelet glycoprotein V;GP5;ortholog                             |                                              |
| HUMAN HGNC=115 UniProtKB=P53396   | ATP-citrate synthase;ACLY;ortholog                               | transferase(PC00220)                         |
| HUMAN HGNC=18311 UniProtKB=Q9BS26 | Endoplasmic reticulum resident protein 44;ERP44;ortholog         |                                              |
| HUMAN HGNC=1353 UniProtKB=P07358  | Complement component C8 beta chain;C8B;ortholog                  |                                              |
| HUMAN HGNC=5 UniProtKB=P04217     | Alpha-1B-glycoprotein;A1BG;ortholog                              | immunoglobulin receptor superfamily(PC00124) |
| HUMAN HGNC=11075 UniProtKB=O14745 | Na(+)/H(+) exchange regulatory cofactor NHERF1;SLC9A3R1;ortholog |                                              |
| HUMAN HGNC=167 UniProtKB=P61163   | Alpha-centractin;ACTR1A;ortholog                                 | actin and actin related protein(PC00039)     |

|                                      |                                                                                        |                                                       |
|--------------------------------------|----------------------------------------------------------------------------------------|-------------------------------------------------------|
| HUMAN HGNC=13933 UniProtKB=Q5SQ64    | Lymphocyte antigen 6 complex locus protein G6f;LY6G6F;ortholog                         |                                                       |
| HUMAN HGNC=4459 UniProtKB=P80108     | Phosphatidylinositol-glycan-specific phospholipase D;GPLD1;ortholog                    | phospholipase(PC00186)                                |
| HUMAN HGNC=17213 UniProtKB=Q9BWP8    | Collectin-11;COLEC11;ortholog                                                          | surfactant(PC00212)                                   |
| HUMAN HGNC=14685 UniProtKB=Q9Y624    | Junctional adhesion molecule A;F11R;ortholog                                           |                                                       |
| HUMAN HGNC=1491 UniProtKB=P47756     | F-actin-capping protein subunit beta;CAPZB;ortholog                                    | non-motor actin binding protein(PC00165)              |
| HUMAN HGNC=3350 UniProtKB=P06733     | Alpha-enolase;ENO1;ortholog                                                            | lyase(PC00144)                                        |
| HUMAN HGNC=9784 UniProtKB=P61020     | Ras-related protein Rab-5B;RAB5B;ortholog                                              |                                                       |
| HUMAN HGNC=5246 UniProtKB=P04792     | Heat shock protein beta-1;HSPB1;ortholog                                               |                                                       |
| HUMAN HGNC=19286 UniProtKB=Q6P3W7    | SCY1-like protein 2;SCYL2;ortholog                                                     | non-receptor serine/threonine protein kinase(PC00167) |
| HUMAN HGNC=3602 UniProtKB=Q9UBX5     | Fibulin-5;FBLN5;ortholog                                                               | extracellular matrix structural protein(PC00103)      |
| HUMAN HGNC=22197 UniProtKB=O43299    | AP-5 complex subunit zeta-1;AP5Z1;ortholog                                             |                                                       |
| HUMAN HGNC=16754 UniProtKB=Q96P50    | Arf-GAP with coiled-coil, ANK repeat and PH domain-containing protein 3;ACAP3;ortholog |                                                       |
| HUMAN HGNC=12754 UniProtKB=O75083    | WD repeat-containing protein 1;WDR1;ortholog                                           | non-motor actin binding protein(PC00165)              |
| HUMAN HGNC=5800 UniProtKB=A0A075B6S2 | Immunoglobulin kappa variable 2D-29;IGKV2D-29;ortholog                                 | immunoglobulin(PC00123)                               |
| HUMAN HGNC=15878 UniProtKB=Q9NQ75    | Cas scaffolding protein family member 4;CASS4;ortholog                                 |                                                       |
| HUMAN HGNC=31104 UniProtKB=Q92614    | Unconventional myosin-XVIIIa;MYO18A;ortholog                                           |                                                       |
| HUMAN HGNC=11071 UniProtKB=P19634    | Sodium/hydrogen exchanger 1;SLC9A1;ortholog                                            | secondary carrier transporter(PC00258)                |
| HUMAN HGNC=4162 UniProtKB=P41250     | Glycine--tRNA ligase;GARS1;ortholog                                                    | aminoacyl-tRNA synthetase(PC00047)                    |
| HUMAN HGNC=13206 UniProtKB=O60296    | Trafficking kinesin-binding protein 2;TRAK2;ortholog                                   | membrane traffic protein(PC00150)                     |
| HUMAN HGNC=5461 UniProtKB=P78318     | Immunoglobulin-binding protein 1;IGBP1;ortholog                                        | chaperone(PC00072)                                    |
| HUMAN HGNC=4831 UniProtKB=P69891     | Hemoglobin subunit gamma-1;HBG1;ortholog                                               |                                                       |
| HUMAN HGNC=20063 UniProtKB=Q86T82    | Ubiquitin carboxyl-terminal hydrolase 37;USP37;ortholog                                | cysteine protease(PC00081)                            |
| HUMAN HGNC=19740 UniProtKB=Q96RV3    | Pecanex-like protein 1;PCNX1;ortholog                                                  |                                                       |
| HUMAN HGNC=2067 UniProtKB=O00151     | PDZ and LIM domain protein 1;PDLIM1;ortholog                                           | actin or actin-binding cytoskeletal protein(PC00041)  |
| HUMAN HGNC=28843 UniProtKB=Q9HC44    | Vasculin-like protein 1;GPBP1L1;ortholog                                               |                                                       |

|                                      |                                                                                  |                                          |
|--------------------------------------|----------------------------------------------------------------------------------|------------------------------------------|
| HUMAN HGNC=7380 UniProtKB=P26927     | Hepatocyte growth factor-like protein;MST1;ortholog                              | serine protease(PC00203)                 |
| HUMAN HGNC=3309 UniProtKB=P08246     | Neutrophil elastase;ELANE;ortholog                                               | serine protease(PC00203)                 |
| HUMAN HGNC=24251 UniProtKB=Q9Y3A6    | Transmembrane emp24 domain-containing protein 5;TMED5;ortholog                   | vesicle coat protein(PC00235)            |
| HUMAN HGNC=669 UniProtKB=P08134      | Rho-related GTP-binding protein RhoC;RHOC;ortholog                               | small GTPase(PC00208)                    |
| HUMAN HGNC=24175 UniProtKB=Q9P035    | Very-long-chain (3R)-3-hydroxyacyl-CoA dehydratase 3;HACD3;ortholog              |                                          |
| HUMAN HGNC=12852 UniProtKB=P61981    | 14-3-3 protein gamma;YWHAG;ortholog                                              | scaffold/adaptor protein(PC00226)        |
| HUMAN HGNC=5581 UniProtKB=P01766     | Immunoglobulin heavy variable 3-13;IGHV3-13;ortholog                             | immunoglobulin(PC00123)                  |
| HUMAN HGNC=9449 UniProtKB=P04156     | Major prion protein;PRNP;ortholog                                                | calcium-binding protein(PC00060)         |
| HUMAN HGNC=164 UniProtKB=P35609      | Alpha-actinin-2;ACTN2;ortholog                                                   |                                          |
| HUMAN HGNC=37094 UniProtKB=P0CG39    | POTE ankyrin domain family member J;POTEJ;ortholog                               | membrane traffic protein(PC00150)        |
| HUMAN HGNC=18325 UniProtKB=Q2WGN9    | GRB2-associated-binding protein 4;GAB4;ortholog                                  | scaffold/adaptor protein(PC00226)        |
| HUMAN HGNC=5857 UniProtKB=P0DOY3     | Immunoglobulin lambda constant 3;IGLC3;ortholog                                  | immunoglobulin(PC00123)                  |
| HUMAN HGNC=2696 UniProtKB=Q9UJU6     | Drebrin-like protein;DBNL;ortholog                                               | non-motor actin binding protein(PC00165) |
| HUMAN HGNC=3662 UniProtKB=P02675     | Fibrinogen beta chain;FGB;ortholog                                               | intercellular signal molecule(PC00207)   |
| HUMAN HGNC=17865 UniProtKB=Q96A26    | Protein FAM162A;FAM162A;ortholog                                                 |                                          |
| HUMAN HGNC=7176 UniProtKB=P14780     | Matrix metalloproteinase-9;MMP9;ortholog                                         | metalloprotease(PC00153)                 |
| HUMAN HGNC=11125 UniProtKB=P61956    | Small ubiquitin-related modifier 2;SUMO2;ortholog                                |                                          |
| HUMAN HGNC=92 UniProtKB=P49748       | Very long-chain specific acyl-CoA dehydrogenase, mitochondrial;ACADVL;ortholog   | dehydrogenase(PC00092)                   |
| HUMAN HGNC=9553 UniProtKB=P62333     | 26S proteasome regulatory subunit 10B;PSMC6;ortholog                             | protease(PC00190)                        |
| HUMAN HGNC=1908 UniProtKB=Q96RL7     | Vacuolar protein sorting-associated protein 13A;VPS13A;ortholog                  | membrane traffic protein(PC00150)        |
| HUMAN HGNC=5033 UniProtKB=P22626     | Heterogeneous nuclear ribonucleoproteins A2/B1;HNRNPA2B1;ortholog                |                                          |
| HUMAN HGNC=30178 UniProtKB=Q9Y570    | Protein phosphatase methylesterase 1;PPME1;ortholog                              | protein modifying enzyme(PC00260)        |
| HUMAN HGNC=5781 UniProtKB=A0A0C4DH68 | Immunoglobulin kappa variable 2-24;IGKV2-24;ortholog                             | immunoglobulin(PC00123)                  |
| HUMAN HGNC=9866 UniProtKB=P13631     | Retinoic acid receptor gamma;RARG;ortholog                                       | C4 zinc finger nuclear receptor(PC00169) |
| HUMAN HGNC=2689 UniProtKB=P09172     | Dopamine beta-hydroxylase;DBH;ortholog                                           | hydroxylase(PC00122)                     |
| HUMAN HGNC=9281 UniProtKB=P62136     | Serine/threonine-protein phosphatase PP1-alpha catalytic subunit;PPP1CA;ortholog | protein phosphatase(PC00195)             |
| HUMAN HGNC=291 UniProtKB=P30566      | Adenylosuccinate lyase;ADSL;ortholog                                             | lyase(PC00144)                           |



|                                      |                                                                              |                                                      |
|--------------------------------------|------------------------------------------------------------------------------|------------------------------------------------------|
| HUMAN HGNC=10499 UniProtKB=P06702    | Protein S100-A9;S100A9;ortholog                                              | calmodulin-related(PC00061)                          |
| HUMAN HGNC=3149 UniProtKB=Q13011     | Delta(3,5)-Delta(2,4)-dienoyl-CoA isomerase, mitochondrial;ECH1;ortholog     | hydratase(PC00120)                                   |
| HUMAN HGNC=5549 UniProtKB=A0A0C4DH31 | Immunoglobulin heavy variable 1-18;IGHV1-18;ortholog                         | immunoglobulin(PC00123)                              |
| HUMAN HGNC=11343 UniProtKB=P50502    | Hsc70-interacting protein;ST13;ortholog                                      |                                                      |
| HUMAN HGNC=658 UniProtKB=P84085      | ADP-ribosylation factor 5;ARF5;ortholog                                      | G-protein(PC00020)                                   |
| HUMAN HGNC=7579 UniProtKB=P35579     | Myosin-9;MYH9;ortholog                                                       |                                                      |
| HUMAN HGNC=29427 UniProtKB=Q8TF17    | SH3 domain and tetratricopeptide repeat-containing protein 2;SH3TC2;ortholog |                                                      |
| HUMAN HGNC=3465 UniProtKB=P10768     | S-formylglutathione hydrolase;ESD;ortholog                                   | serine protease(PC00203)                             |
| HUMAN HGNC=13397 UniProtKB=Q9UHQ9    | NADH-cytochrome b5 reductase 1;CYB5R1;ortholog                               | reductase(PC00198)                                   |
| HUMAN HGNC=5716 UniProtKB=P01834     | Immunoglobulin kappa constant;IGKC;ortholog                                  | immunoglobulin(PC00123)                              |
| HUMAN HGNC=871 UniProtKB=Q9UII2      | ATPase inhibitor, mitochondrial;ATP5IF1;ortholog                             | ligase(PC00142)                                      |
| HUMAN HGNC=19246 UniProtKB=Q9NYB0    | Telomeric repeat-binding factor 2-interacting protein 1;TERF2IP;ortholog     | DNA metabolism protein(PC00009)                      |
| HUMAN HGNC=9545 UniProtKB=P28062     | Proteasome subunit beta type-8;PSMB8;ortholog                                | protease(PC00190)                                    |
| HUMAN HGNC=11030 UniProtKB=Q9Y6R1    | Electrogenic sodium bicarbonate cotransporter 1;SLC4A4;ortholog              | secondary carrier transporter(PC00258)               |
| HUMAN HGNC=4932 UniProtKB=P01889     | HLA class I histocompatibility antigen, B alpha chain;HLA-B;ortholog         | major histocompatibility complex protein(PC00149)    |
| HUMAN HGNC=21449 UniProtKB=Q86UX2    | Inter-alpha-trypsin inhibitor heavy chain H5;ITIH5;ortholog                  | protease inhibitor(PC00191)                          |
| HUMAN HGNC=9723 UniProtKB=P11216     | Glycogen phosphorylase, brain form;PYGB;ortholog                             | glycosyltransferase(PC00111)                         |
| HUMAN HGNC=29827 UniProtKB=O14950    |                                                                              | actin or actin-binding cytoskeletal protein(PC00041) |
| HUMAN HGNC=584 UniProtKB=P02743      | Myosin regulatory light chain 12B;MYL12B;ortholog                            |                                                      |
| HUMAN HGNC=29953 UniProtKB=Q8WWZ8    | Serum amyloid P-component;APCS;ortholog                                      |                                                      |
| HUMAN HGNC=4440 UniProtKB=P13224     | Oncoprotein-induced transcript 3 protein;OIT3;ortholog                       | transmembrane signal receptor(PC00197)               |
| HUMAN HGNC=16854 UniProtKB=Q9Y4G8    | Platelet glycoprotein Ib beta chain;GP1BB;ortholog                           |                                                      |
| HUMAN HGNC=12494 UniProtKB=Q13404    | Rap guanine nucleotide exchange factor 2;RAPGEF2;ortholog                    | guanyl-nucleotide exchange factor(PC00113)           |
| HUMAN HGNC=27424 UniProtKB=Q5T481    | Ubiquitin-conjugating enzyme E2 variant 1;UBE2V1;ortholog                    | ubiquitin-protein ligase(PC00234)                    |
| HUMAN HGNC=30747 UniProtKB=P61201    | RNA-binding protein 20;RBM20;ortholog                                        |                                                      |
| HUMAN HGNC=7127 UniProtKB=P40692     | COP9 signalosome complex subunit 2;COPS2;ortholog                            |                                                      |
|                                      | DNA mismatch repair protein Mlh1;MLH1;ortholog                               | DNA metabolism protein(PC00009)                      |

|                                      |                                                                            |                                                  |
|--------------------------------------|----------------------------------------------------------------------------|--------------------------------------------------|
| HUMAN HGNC=10825 UniProtKB=P78314    | SH3 domain-binding protein 2;SH3BP2;ortholog                               |                                                  |
| HUMAN HGNC=15667 UniProtKB=P58546    | Myotrophin;MTPN;ortholog                                                   |                                                  |
| HUMAN HGNC=17073 UniProtKB=Q9UNA1    | Rho GTPase-activating protein 26;ARHGAP26;ortholog                         | GTPase-activating protein(PC00257)               |
| HUMAN HGNC=12692 UniProtKB=P08670    | Vimentin;VIM;ortholog                                                      |                                                  |
| HUMAN HGNC=4861 UniProtKB=Q9NRZ9     | Lymphoid-specific helicase;HELLS;ortholog                                  |                                                  |
| HUMAN HGNC=6396 UniProtKB=O00505     | Importin subunit alpha-4;KPNA3;ortholog                                    | transporter(PC00227)                             |
| HUMAN HGNC=26027 UniProtKB=Q9H0A8    | COMM domain-containing protein 4;COMMD4;ortholog                           |                                                  |
| HUMAN HGNC=13518 UniProtKB=Q9Y696    | Chloride intracellular channel protein 4;CLIC4;ortholog                    | ion channel(PC00133)                             |
| HUMAN HGNC=6922 UniProtKB=P11226     | Mannose-binding protein C;MBL2;ortholog                                    | extracellular matrix structural protein(PC00103) |
| HUMAN HGNC=13919 UniProtKB=P46379    | Large proline-rich protein BAG6;BAG6;ortholog                              | chaperone(PC00072)                               |
| HUMAN HGNC=6711 UniProtKB=Q06643     | Lymphotoxin-beta;LTB;ortholog                                              |                                                  |
| HUMAN HGNC=399 UniProtKB=P02768      | Albumin;ALB;ortholog                                                       | transfer/carrier protein(PC00219)                |
| HUMAN HGNC=15453 UniProtKB=Q9H3P7    | Golgi resident protein GCP60;ACBD3;ortholog                                |                                                  |
| HUMAN HGNC=17136 UniProtKB=Q8IY81    | pre-rRNA 2'-O-ribose RNA methyltransferase FTSJ3;FTSJ3;ortholog            | RNA methyltransferase(PC00033)                   |
| HUMAN HGNC=28959 UniProtKB=Q14008    | Cytoskeleton-associated protein 5;CKAP5;ortholog                           | non-motor microtubule binding protein(PC00166)   |
| HUMAN HGNC=10690 UniProtKB=O95810    | Caveolae-associated protein 2;CAVIN2;ortholog                              | membrane traffic protein(PC00150)                |
| HUMAN HGNC=13759 UniProtKB=Q7L576    | Cytoplasmic FMR1-interacting protein 1;CYFIP1;ortholog                     | scaffold/adaptor protein(PC00226)                |
| HUMAN HGNC=12840 UniProtKB=P54577    | Tyrosine--tRNA ligase, cytoplasmic;YARS1;ortholog                          | translational protein(PC00263)                   |
| HUMAN HGNC=20597 UniProtKB=P61960    | Ubiquitin-fold modifier 1;UFM1;ortholog                                    |                                                  |
| HUMAN HGNC=29229 UniProtKB=Q9ULI1    | NACHT and WD repeat domain-containing protein 2;NWD2;ortholog              |                                                  |
| HUMAN HGNC=5897 UniProtKB=A0A075B6K4 | Immunoglobulin lambda variable 3-10;IGLV3-10;ortholog                      | immunoglobulin(PC00123)                          |
| HUMAN HGNC=30244 UniProtKB=Q6P1A2    | Lysophospholipid acyltransferase 5;LPCAT3;ortholog                         | acetyltransferase(PC00038)                       |
| HUMAN HGNC=7892 UniProtKB=P00491     | Purine nucleoside phosphorylase;PNP;ortholog                               | nucleotide kinase(PC00172)                       |
| HUMAN HGNC=2478 UniProtKB=Q15828     | Cystatin-M;CST6;ortholog                                                   |                                                  |
| HUMAN HGNC=30220 UniProtKB=Q96AA3    | Protein RFT1 homolog;RFT1;ortholog                                         |                                                  |
| HUMAN HGNC=25452 UniProtKB=Q8N4L2    | Type 2 phosphatidylinositol 4,5-bisphosphate 4-phosphatase;PIP4P2;ortholog |                                                  |

|                                   |                                                                          |                                            |
|-----------------------------------|--------------------------------------------------------------------------|--------------------------------------------|
| HUMAN HGNC=603 UniProtKB=P04114   | Apolipoprotein B-100;APOB;ortholog                                       | apolipoprotein(PC00052)                    |
| HUMAN HGNC=24331 UniProtKB=Q5VYJ5 | MAM and LDL-receptor class A domain-containing protein 1;MALRD1;ortholog |                                            |
| HUMAN HGNC=24319 UniProtKB=Q8IY22 | C-Maf-inducing protein;CMIP;ortholog                                     |                                            |
| HUMAN HGNC=846 UniProtKB=P56385   | ATP synthase subunit e, mitochondrial;ATP5ME;ortholog                    | ATP synthase(PC00002)                      |
| HUMAN HGNC=21883 UniProtKB=Q9H3E2 | Sorting nexin-25;SNX25;ortholog                                          | scaffold/adaptor protein(PC00226)          |
| HUMAN HGNC=12363 UniProtKB=P49815 | Tuberin;TSC2;ortholog                                                    | GTPase-activating protein(PC00257)         |
| HUMAN HGNC=6111 UniProtKB=Q13576  | Ras GTPase-activating-like protein IQGAP2;IQGAP2;ortholog                | GTPase-activating protein(PC00257)         |
| HUMAN HGNC=983 UniProtKB=P06276   | Cholinesterase;BCHE;ortholog                                             | esterase(PC00097)                          |
| HUMAN HGNC=166 UniProtKB=O43707   | Alpha-actinin-4;ACTN4;ortholog                                           |                                            |
| HUMAN HGNC=20175 UniProtKB=Q9Y3E0 | Vesicle transport protein GOT1B;GOLT1B;ortholog                          | lipase(PC00143)                            |
| HUMAN HGNC=11364 UniProtKB=P40763 | Signal transducer and activator of transcription 3;STAT3;ortholog        | DNA-binding transcription factor(PC00218)  |
| HUMAN HGNC=9847 UniProtKB=P43487  | Ran-specific GTPase-activating protein;RANBP1;ortholog                   | scaffold/adaptor protein(PC00226)          |
| HUMAN HGNC=2363 UniProtKB=P46109  | Crk-like protein;CRKL;ortholog                                           | scaffold/adaptor protein(PC00226)          |
| HUMAN HGNC=11771 UniProtKB=Q15582 | Transforming growth factor-beta-induced protein ig-h3;TGFB1;ortholog     | cell adhesion molecule(PC00069)            |
| HUMAN HGNC=2952 UniProtKB=Q96JB1  | Dynein heavy chain 8, axonemal;DNAH8;ortholog                            | microtubule binding motor protein(PC00156) |
| HUMAN HGNC=25541 UniProtKB=P57088 | Transmembrane protein 33;TMEM33;ortholog                                 |                                            |
| HUMAN HGNC=30512 UniProtKB=Q5JSH3 | WD repeat-containing protein 44;WDR44;ortholog                           |                                            |
| HUMAN HGNC=11092 UniProtKB=P03973 | Antileukoprotease;SLPI;ortholog                                          | protease inhibitor(PC00191)                |
| HUMAN HGNC=12469 UniProtKB=P22314 | Ubiquitin-like modifier-activating enzyme 1;UBA1;ortholog                | ubiquitin-protein ligase(PC00234)          |
| HUMAN HGNC=20292 UniProtKB=Q9Y376 | Calcium-binding protein 39;CAB39;ortholog                                |                                            |
| HUMAN HGNC=16015 UniProtKB=Q9H8S9 | MOB kinase activator 1A;MOB1A;ortholog                                   | kinase activator(PC00138)                  |
| HUMAN HGNC=5164 UniProtKB=Q9Y251  | Heparanase;HPSE;ortholog                                                 | glycosidase(PC00110)                       |
| HUMAN HGNC=19072 UniProtKB=Q96J01 | THO complex subunit 3;THOC3;ortholog                                     | RNA metabolism protein(PC00031)            |
| HUMAN HGNC=6522 UniProtKB=P04180  | Phosphatidylcholine-sterol acyltransferase;LCAT;ortholog                 | acyltransferase(PC00042)                   |
| HUMAN HGNC=9308 UniProtKB=Q15257  | Serine/threonine-protein phosphatase 2A activator;PTPA;ortholog          | phosphatase activator(PC00182)             |
| HUMAN HGNC=11226 UniProtKB=Q96JI7 | Spatacin;SPG11;ortholog                                                  |                                            |
| HUMAN HGNC=24588 UniProtKB=Q86XP6 | Gastroke-2;GKN2;ortholog                                                 |                                            |

|                                      |                                                                                                    |                                                  |
|--------------------------------------|----------------------------------------------------------------------------------------------------|--------------------------------------------------|
| HUMAN HGNC=7421 UniProtKB=P00403     | Cytochrome c oxidase subunit 2;MT-CO2;ortholog                                                     | oxidoreductase(PC00176)                          |
| HUMAN HGNC=9021 UniProtKB=P14618     | Pyruvate kinase PKM;PKM;ortholog                                                                   | kinase(PC00137)                                  |
| HUMAN HGNC=3244 UniProtKB=Q9NZN3     | EH domain-containing protein 3;EHD3;ortholog                                                       | membrane traffic protein(PC00150)                |
| HUMAN HGNC=3377 UniProtKB=P11171     | Protein 4.1;EPB41;ortholog                                                                         |                                                  |
| HUMAN HGNC=11317 UniProtKB=Q04837    | Single-stranded DNA-binding protein, mitochondrial;SSBP1;ortholog                                  | DNA metabolism protein(PC00009)                  |
| HUMAN HGNC=12527 UniProtKB=Q16851    | UTP--glucose-1-phosphate uridylyltransferase;UGP2;ortholog                                         |                                                  |
| HUMAN HGNC=23172 UniProtKB=Q8N699    | Myc target protein 1;MYCT1;ortholog                                                                |                                                  |
| HUMAN HGNC=586 UniProtKB=P13798      | Acylamino-acid-releasing enzyme;APEH;ortholog                                                      | serine protease(PC00203)                         |
| HUMAN HGNC=2211 UniProtKB=P12109     | Collagen alpha-1(VI) chain;COL6A1;ortholog                                                         | extracellular matrix structural protein(PC00103) |
| HUMAN HGNC=1352 UniProtKB=P07357     | Complement component C8 alpha chain;C8A;ortholog                                                   |                                                  |
| HUMAN HGNC=9304 UniProtKB=P63151     | Serine/threonine-protein phosphatase 2A 55 kDa regulatory subunit B alpha isoform;PPP2R2A;ortholog | protein phosphatase(PC00195)                     |
| HUMAN HGNC=6637 UniProtKB=P20700     | Lamin-B1;LMNB1;ortholog                                                                            |                                                  |
| HUMAN HGNC=7539 UniProtKB=Q9NR99     | Matrix-remodeling-associated protein 5;MXRA5;ortholog                                              |                                                  |
| HUMAN HGNC=5901 UniProtKB=A0A075B6K0 | Immunoglobulin lambda variable 3-16;IGLV3-16;ortholog                                              | immunoglobulin(PC00123)                          |
| HUMAN HGNC=10011 UniProtKB=Q15382    | GTP-binding protein Rheb;RHEB;ortholog                                                             | small GTPase(PC00208)                            |
| HUMAN HGNC=6383 UniProtKB=P01042     | Kininogen-1;KNG1;ortholog                                                                          | protease inhibitor(PC00191)                      |
| HUMAN HGNC=1504 UniProtKB=P42574     | Caspase-3;CASP3;ortholog                                                                           | protease(PC00190)                                |
| HUMAN HGNC=9959 UniProtKB=P51606     | N-acylglucosamine 2-epimerase;RENBP;ortholog                                                       | epimerase/racemase(PC00096)                      |
| HUMAN HGNC=15567 UniProtKB=Q9UJC5    | SH3 domain-binding glutamic acid-rich-like protein 2;SH3BGR2;ortholog                              |                                                  |
| HUMAN HGNC=7413 UniProtKB=Q13126     | S-methyl-5'-thioadenosine phosphorylase;MTAP;ortholog                                              | nucleotide kinase(PC00172)                       |
| HUMAN HGNC=8630 UniProtKB=P30086     | Phosphatidylethanolamine-binding protein 1;PEBP1;ortholog                                          | protease inhibitor(PC00191)                      |
| HUMAN HGNC=23791 UniProtKB=Q27J81    | Inverted formin-2;INF2;ortholog                                                                    |                                                  |
| HUMAN HGNC=4439 UniProtKB=P07359     | Platelet glycoprotein Ib alpha chain;GP1BA;ortholog                                                | transmembrane signal receptor(PC00197)           |
| HUMAN HGNC=4638 UniProtKB=P09211     | Glutathione S-transferase P;GSTP1;ortholog                                                         | transferase(PC00220)                             |
| HUMAN HGNC=3625 UniProtKB=O75636     | Ficolin-3;FCN3;ortholog                                                                            | intercellular signal molecule(PC00207)           |
| HUMAN HGNC=13667 UniProtKB=Q9BXS5    | AP-1 complex subunit mu-1;AP1M1;ortholog                                                           | membrane traffic protein(PC00150)                |

|                                      |                                                                        |                                                              |
|--------------------------------------|------------------------------------------------------------------------|--------------------------------------------------------------|
| HUMAN HGNC=21035 UniProtKB=Q8N392    | Rho GTPase-activating protein 18;ARHGAP18;ortholog                     | GTPase-activating protein(PC00257)                           |
| HUMAN HGNC=19829 UniProtKB=Q8N128    | Protein FAM177A1;FAM177A1;ortholog                                     |                                                              |
| HUMAN HGNC=7106 UniProtKB=P54252     | Ataxin-3;ATXN3;ortholog                                                | chromatin/chromatin-binding, or -regulatory protein(PC00077) |
| HUMAN HGNC=29531 UniProtKB=Q6PKG0    | La-related protein 1;LARP1;ortholog                                    | RNA metabolism protein(PC00031)                              |
| HUMAN HGNC=2665 UniProtKB=P08174     | Complement decay-accelerating factor;CD55;ortholog                     |                                                              |
| HUMAN HGNC=14060 UniProtKB=Q9UBZ9    | DNA repair protein REV1;REV1;ortholog                                  | DNA metabolism protein(PC00009)                              |
| HUMAN HGNC=12648 UniProtKB=Q9P0L0    | Vesicle-associated membrane protein-associated protein A;VAPA;ortholog | membrane trafficking regulatory protein(PC00151)             |
| HUMAN HGNC=4312 UniProtKB=P48507     | Glutamate--cysteine ligase regulatory subunit;GCLM;ortholog            | ligase(PC00142)                                              |
| HUMAN HGNC=18621 UniProtKB=Q9Y2V7    | Conserved oligomeric Golgi complex subunit 6;COG6;ortholog             |                                                              |
| HUMAN HGNC=4632 UniProtKB=P09488     | Glutathione S-transferase Mu 1;GSTM1;ortholog                          | transferase(PC00220)                                         |
| HUMAN HGNC=28817 UniProtKB=Q96AG4    | Leucine-rich repeat-containing protein 59;LRRC59;ortholog              | scaffold/adaptor protein(PC00226)                            |
| HUMAN HGNC=12736 UniProtKB=O43516    | WAS/WASL-interacting protein family member 1;WIPF1;ortholog            | actin or actin-binding cytoskeletal protein(PC00041)         |
| HUMAN HGNC=3531 UniProtKB=P00488     | Coagulation factor XIII A chain;F13A1;ortholog                         | transferase(PC00220)                                         |
| HUMAN HGNC=5622 UniProtKB=A0A0B4J1Y9 | Immunoglobulin heavy variable 3-72;IGHV3-72;ortholog                   | immunoglobulin(PC00123)                                      |
| HUMAN HGNC=5594 UniProtKB=P0DP03     | Immunoglobulin heavy variable 3-30-5;IGHV3-30-5;ortholog               | immunoglobulin(PC00123)                                      |
| HUMAN HGNC=8876 UniProtKB=P17858     | ATP-dependent 6-phosphofructokinase, liver type;PFKL;ortholog          | carbohydrate kinase(PC00065)                                 |
| HUMAN HGNC=11424 UniProtKB=O43815    | Striatin;STRN;ortholog                                                 |                                                              |
| HUMAN HGNC=9295 UniProtKB=Q15435     | Protein phosphatase 1 regulatory subunit 7;PPP1R7;ortholog             | phosphatase modulator(PC00184)                               |
| HUMAN HGNC=4036 UniProtKB=O15117     | FYN-binding protein 1;FYB1;ortholog                                    | scaffold/adaptor protein(PC00226)                            |
| HUMAN HGNC=418 UniProtKB=P09972      | Fructose-bisphosphate aldolase C;ALDOC;ortholog                        | aldolase(PC00044)                                            |
| HUMAN HGNC=21605 UniProtKB=Q14151    | Scaffold attachment factor B2;SAFB2;ortholog                           |                                                              |
| HUMAN HGNC=29890 UniProtKB=Q86UT6    | NLR family member X1;NLRX1;ortholog                                    | scaffold/adaptor protein(PC00226)                            |
| HUMAN HGNC=29213 UniProtKB=Q8WUJ3    | Cell migration-inducing and hyaluronan-binding protein;CEMIP;ortholog  |                                                              |
| HUMAN HGNC=9386 UniProtKB=Q9UGJ0     | 5'-AMP-activated protein kinase subunit gamma-2;PRKAG2;ortholog        | kinase modulator(PC00140)                                    |
| HUMAN HGNC=13238 UniProtKB=Q9HDC9    | Adipocyte plasma membrane-associated protein;APMAP;ortholog            |                                                              |

|                                      |                                                                                        |                                                      |
|--------------------------------------|----------------------------------------------------------------------------------------|------------------------------------------------------|
| HUMAN HGNC=706 UniProtKB=O15145      | Actin-related protein 2/3 complex subunit 3;ARPC3;ortholog                             | actin or actin-binding cytoskeletal protein(PC00041) |
| HUMAN HGNC=598 UniProtKB=Q06481      | Amyloid-like protein 2;APLP2;ortholog                                                  | protease inhibitor(PC00191)                          |
| HUMAN HGNC=30547 UniProtKB=Q96K17    | Transcription factor BTF3 homolog 4;BTF3L4;ortholog                                    | DNA-binding transcription factor(PC00218)            |
| HUMAN HGNC=8968 UniProtKB=P01833     | Polymeric immunoglobulin receptor;PIGR;ortholog                                        | immunoglobulin receptor superfamily(PC00124)         |
| HUMAN HGNC=23186 UniProtKB=Q14677    | Clathrin interactor 1;CLINT1;ortholog                                                  |                                                      |
| HUMAN HGNC=2092 UniProtKB=Q00610     | Clathrin heavy chain 1;CLTC;ortholog                                                   | vesicle coat protein(PC00235)                        |
| HUMAN HGNC=10996 UniProtKB=O14975    | Very long-chain acyl-CoA synthetase;SLC27A2;ortholog                                   | secondary carrier transporter(PC00258)               |
| HUMAN HGNC=25012 UniProtKB=Q3ZCW2    | Galectin-related protein;LGALS1;ortholog                                               | extracellular matrix protein(PC00102)                |
| HUMAN HGNC=11820 UniProtKB=P01033    | Metalloproteinase inhibitor 1;TIMP1;ortholog                                           | protease inhibitor(PC00191)                          |
| HUMAN HGNC=28973 UniProtKB=Q14165    | Malectin;MLEC;ortholog                                                                 |                                                      |
| HUMAN HGNC=5468 UniProtKB=P35858     | Insulin-like growth factor-binding protein complex acid labile subunit;IGFALS;ortholog | transmembrane signal receptor(PC00197)               |
| HUMAN HGNC=16369 UniProtKB=Q99497    | Parkinson disease protein 7;PARK7;ortholog                                             |                                                      |
| HUMAN HGNC=12674 UniProtKB=Q9Y277    | Voltage-dependent anion-selective channel protein 3;VDAC3;ortholog                     | voltage-gated ion channel(PC00241)                   |
| HUMAN HGNC=9469 UniProtKB=O14668     | Transmembrane gamma-carboxyglutamic acid protein 1;PRRG1;ortholog                      | serine protease(PC00203)                             |
| HUMAN HGNC=6740 UniProtKB=P61626     | Lysozyme C;LYZ;ortholog                                                                |                                                      |
| HUMAN HGNC=24700 UniProtKB=Q5QNW6    | Histone H2B type 2-F;H2BC18;ortholog                                                   | histone(PC00118)                                     |
| HUMAN HGNC=28928 UniProtKB=Q86Y46    | Keratin, type II cytoskeletal 73;KRT73;ortholog                                        |                                                      |
| HUMAN HGNC=6901 UniProtKB=P48740     | Mannan-binding lectin serine protease 1;MASP1;ortholog                                 | serine protease(PC00203)                             |
| HUMAN HGNC=6168 UniProtKB=Q06033     | Inter-alpha-trypsin inhibitor heavy chain H3;ITIH3;ortholog                            | protease inhibitor(PC00191)                          |
| HUMAN HGNC=5889 UniProtKB=A0A075B6J9 | Immunoglobulin lambda variable 2-18;IGLV2-18;ortholog                                  | immunoglobulin(PC00123)                              |
| HUMAN HGNC=2876 UniProtKB=O60610     | Protein diaphanous homolog 1;DIAPH1;ortholog                                           |                                                      |
| HUMAN HGNC=9568 UniProtKB=Q06323     | Proteasome activator complex subunit 1;PSME1;ortholog                                  |                                                      |
| HUMAN HGNC=5759 UniProtKB=A0A087WSZ0 | Immunoglobulin kappa variable 1D-8;IGKV1D-8;ortholog                                   | immunoglobulin(PC00123)                              |
| HUMAN HGNC=7097 UniProtKB=P14174     | Macrophage migration inhibitory factor;MIF;ortholog                                    | decarboxylase(PC00089)                               |
| HUMAN HGNC=9259 UniProtKB=P30405     | Peptidyl-prolyl cis-trans isomerase F, mitochondrial;PPIF;ortholog                     | chaperone(PC00072)                                   |
| HUMAN HGNC=20451 UniProtKB=Q8IWB7    | WD repeat and FYVE domain-containing protein 1;WDFY1;ortholog                          |                                                      |

|                                         |                                                                                   |                                                       |
|-----------------------------------------|-----------------------------------------------------------------------------------|-------------------------------------------------------|
| HUMAN HGNC=14313 UniProtKB=Q8WYA0       | Intraflagellar transport protein 81 homolog;IFT81;ortholog                        |                                                       |
| HUMAN HGNC=9275 UniProtKB=P35813        | Protein phosphatase 1A;PPM1A;ortholog                                             |                                                       |
| HUMAN Gene=SELO UniProtKB=Q9BVL4        | Protein adenylyltransferase SelO, mitochondrial;SELENOO;ortholog                  |                                                       |
| HUMAN HGNC=12855 UniProtKB=P63104       | 14-3-3 protein zeta/delta;YWHAZ;ortholog                                          | scaffold/adaptor protein(PC00226)                     |
| HUMAN HGNC=6040 UniProtKB=Q13418        | Integrin-linked protein kinase;ILK;ortholog                                       | non-receptor serine/threonine protein kinase(PC00167) |
| HUMAN HGNC=11085 UniProtKB=O75093       | Slit homolog 1 protein;SLIT1;ortholog                                             |                                                       |
| HUMAN HGNC=9885 UniProtKB=P29374        | AT-rich interactive domain-containing protein 4A;ARID4A;ortholog                  | transcription cofactor(PC00217)                       |
| HUMAN HGNC=3964 UniProtKB=P01225        | Follitropin subunit beta;FSHB;ortholog                                            | peptide hormone(PC00179)                              |
| HUMAN HGNC=10542 UniProtKB=O95248       | Myotubularin-related protein 5;SBF1;ortholog                                      | phosphatase(PC00181)                                  |
| HUMAN HGNC=33704 UniProtKB=Q66K66       | Transmembrane protein 198;TMEM198;ortholog                                        |                                                       |
| HUMAN HGNC=21689 UniProtKB=Q9Y3D6       | Mitochondrial fission 1 protein;FIS1;ortholog                                     |                                                       |
| HUMAN HGNC=9551 UniProtKB=P43686        | 26S proteasome regulatory subunit 6B;PSMC4;ortholog                               | protease(PC00190)                                     |
| HUMAN HGNC=29513 UniProtKB=O60306       | RNA helicase aquarius;AQR;ortholog                                                |                                                       |
| HUMAN HGNC=25900 UniProtKB=Q9H425       | Uncharacterized protein C1orf198;C1orf198;ortholog                                |                                                       |
| HUMAN HGNC=369 UniProtKB=Q9UKA4         | A-kinase anchor protein 11;AKAP11;ortholog                                        | scaffold/adaptor protein(PC00226)                     |
| HUMAN HGNC=11442 UniProtKB=O15400       | Syntaxin-7;STX7;ortholog                                                          | SNARE protein(PC00034)                                |
| HUMAN HGNC=5258 UniProtKB=P08238        | Heat shock protein HSP 90-beta;HSP90AB1;ortholog                                  | Hsp90 family chaperone(PC00028)                       |
| HUMAN HGNC=4226 UniProtKB=P31150        | Rab GDP dissociation inhibitor alpha;GDI1;ortholog                                | G-protein modulator(PC00022)                          |
| HUMAN HGNC=11005 UniProtKB=P11166       | Solute carrier family 2, facilitated glucose transporter member 1;SLC2A1;ortholog |                                                       |
| HUMAN HGNC=613 UniProtKB=P02649         | Apolipoprotein E;APOE;ortholog                                                    | apolipoprotein(PC00052)                               |
| HUMAN HGNC=3250 UniProtKB=P47813        | Eukaryotic translation initiation factor 1A, X-chromosomal;EIF1AX;ortholog        | translation initiation factor(PC00224)                |
| HUMAN Gene=HV108_HUMAN UniProtKB=PODP01 | Immunoglobulin heavy variable 1-8;IGHV1-8;ortholog                                | immunoglobulin(PC00123)                               |
| HUMAN HGNC=17234 UniProtKB=Q9BXX3       | Ankyrin repeat domain-containing protein 30A;ANKRD30A;ortholog                    |                                                       |
| HUMAN HGNC=10074 UniProtKB=P13489       | Ribonuclease inhibitor;RNH1;ortholog                                              |                                                       |
| HUMAN HGNC=5046 UniProtKB=P52272        | Heterogeneous nuclear ribonucleoprotein M;HNRNPM;ortholog                         | RNA splicing factor(PC00148)                          |
| HUMAN HGNC=12729 UniProtKB=P23381       | Tryptophan--tRNA ligase, cytoplasmic;WARS1;ortholog                               | aminoacyl-tRNA synthetase(PC00047)                    |

|                                      |                                                                                                    |                                                      |
|--------------------------------------|----------------------------------------------------------------------------------------------------|------------------------------------------------------|
| HUMAN HGNC=1243 UniProtKB=Q07021     | Complement component 1 Q subcomponent-binding protein, mitochondrial;C1QBP;ortholog                |                                                      |
| HUMAN HGNC=7544 UniProtKB=Q96S97     | Myeloid-associated differentiation marker;MYADM;ortholog                                           |                                                      |
| HUMAN HGNC=7060 UniProtKB=P08493     | Matrix Gla protein;MGP;ortholog                                                                    |                                                      |
| HUMAN HGNC=13633 UniProtKB=Q15848    | Adiponectin;ADIPOQ;ortholog                                                                        |                                                      |
| HUMAN HGNC=6703 UniProtKB=Q9Y608     | Leucine-rich repeat flightless-interacting protein 2;LRRFIP2;ortholog                              | DNA-binding transcription factor(PC00218)            |
| HUMAN HGNC=5598 UniProtKB=A0A0C4DH35 | Probable non-functional immunoglobulin heavy variable 3-35;IGHV3-35;ortholog                       | immunoglobulin(PC00123)                              |
| HUMAN HGNC=11828 UniProtKB=Q9UDY2    | Tight junction protein ZO-2;TJP2;ortholog                                                          | tight junction(PC00214)                              |
| HUMAN HGNC=19176 UniProtKB=Q96DZ9    | CKLF-like MARVEL transmembrane domain-containing protein 5;CMTM5;ortholog                          | membrane traffic protein(PC00150)                    |
| HUMAN HGNC=108 UniProtKB=P22303      | Acetylcholinesterase;ACHE;ortholog                                                                 | esterase(PC00097)                                    |
| HUMAN HGNC=12635 UniProtKB=P46939    | Utrophin;UTRN;ortholog                                                                             |                                                      |
| HUMAN HGNC=9581 UniProtKB=Q9H939     | Proline-serine-threonine phosphatase-interacting protein 2;PSTPIP2;ortholog                        | actin or actin-binding cytoskeletal protein(PC00041) |
| HUMAN HGNC=10381 UniProtKB=P04843    | Dolichyl-diphosphooligosaccharide--protein glycosyltransferase subunit 1;RPN1;ortholog             | glycosyltransferase(PC00111)                         |
| HUMAN HGNC=5550 UniProtKB=P23083     | Immunoglobulin heavy variable 1-2;IGHV1-2;ortholog                                                 | immunoglobulin(PC00123)                              |
| HUMAN HGNC=25443 UniProtKB=Q9NSK7    | Protein C19orf12;C19orf12;ortholog                                                                 |                                                      |
| HUMAN HGNC=25842 UniProtKB=Q6UWX4    | HHIP-like protein 2;HHIPL2;ortholog                                                                | protein-binding activity modulator(PC00095)          |
| HUMAN HGNC=5634 UniProtKB=A0A075B7F0 | Ig-like domain-containing protein;IGHV3OR16-10;ortholog                                            | immunoglobulin(PC00123)                              |
| HUMAN HGNC=5171 UniProtKB=P02790     | Hemopexin;HPX;ortholog                                                                             | metalloprotease(PC00153)                             |
| HUMAN HGNC=649 UniProtKB=P48444      | Coatomer subunit delta;ARCN1;ortholog                                                              | vesicle coat protein(PC00235)                        |
| HUMAN HGNC=6541 UniProtKB=P07195     | L-lactate dehydrogenase B chain;LDHB;ortholog                                                      | dehydrogenase(PC00092)                               |
| HUMAN HGNC=2232 UniProtKB=P35606     | Coatomer subunit beta';COPB2;ortholog                                                              | vesicle coat protein(PC00235)                        |
| HUMAN HGNC=2188 UniProtKB=Q99715     | Collagen alpha-1(XII) chain;COL12A1;ortholog                                                       | extracellular matrix structural protein(PC00103)     |
| HUMAN HGNC=12491 UniProtKB=P61081    | NEDD8-conjugating enzyme Ubc12;UBE2M;ortholog                                                      | ubiquitin-protein ligase(PC00234)                    |
| HUMAN HGNC=9302 UniProtKB=P30153     | Serine/threonine-protein phosphatase 2A 65 kDa regulatory subunit A alpha isoform;PPP2R1A;ortholog | phosphatase modulator(PC00184)                       |
| HUMAN HGNC=2367 UniProtKB=P02741     | C-reactive protein;CRP;ortholog                                                                    |                                                      |
| HUMAN HGNC=9071 UniProtKB=P00747     | Plasminogen;PLG;ortholog                                                                           | serine protease(PC00203)                             |
| HUMAN HGNC=3482 UniProtKB=P38117     | Electron transfer flavoprotein subunit beta;ETFB;ortholog                                          | oxidoreductase(PC00176)                              |



|                                      |                                                                                |                                                      |
|--------------------------------------|--------------------------------------------------------------------------------|------------------------------------------------------|
| HUMAN HGNC=30167 UniProtKB=P13667    | Protein disulfide-isomerase A4;PDIA4;ortholog                                  | chaperone(PC00072)                                   |
| HUMAN HGNC=20778 UniProtKB=P07437    | Tubulin beta chain;TUBB;ortholog                                               | tubulin(PC00228)                                     |
| HUMAN HGNC=26853 UniProtKB=Q8N7Z5    | Ankyrin repeat domain-containing protein 31;ANKRD31;ortholog                   | extracellular matrix structural protein(PC00103)     |
| HUMAN HGNC=2209 UniProtKB=P20908     | Collagen alpha-1(V) chain;COL5A1;ortholog                                      |                                                      |
| HUMAN HGNC=21539 UniProtKB=Q9BX46    | RNA-binding protein 24;RBM24;ortholog                                          |                                                      |
| HUMAN HGNC=5575 UniProtKB=A0A0B4J1V2 | Immunoglobulin heavy variable 2-26;IGHV2-26;ortholog                           | immunoglobulin(PC00123) non-receptor                 |
| HUMAN HGNC=12347 UniProtKB=Q9Y4A5    | Transformation/transcription domain-associated protein;TRRAP;ortholog          | serine/threonine protein kinase(PC00167)             |
| HUMAN HGNC=5655 UniProtKB=A0A0C4DH41 | Immunoglobulin heavy variable 4-61;IGHV4-61;ortholog                           | immunoglobulin(PC00123)                              |
| HUMAN HGNC=5856 UniProtKB=P0DOY2     | Immunoglobulin lambda constant 2;IGLC2;ortholog                                | immunoglobulin(PC00123)                              |
| HUMAN HGNC=24822 UniProtKB=Q9H479    | Fructosamine-3-kinase;FN3K;ortholog                                            | kinase(PC00137)                                      |
| HUMAN HGNC=15474 UniProtKB=Q9Y566    | SH3 and multiple ankyrin repeat domains protein 1;SHANK1;ortholog              |                                                      |
| HUMAN HGNC=17468 UniProtKB=Q96HC4    | PDZ and LIM domain protein 5;PDLIM5;ortholog                                   | actin or actin-binding cytoskeletal protein(PC00041) |
| HUMAN HGNC=5898 UniProtKB=A0A075B6K2 | Immunoglobulin lambda variable 3-12;IGLV3-12;ortholog                          | immunoglobulin(PC00123)                              |
| HUMAN HGNC=12601 UniProtKB=O75445    | Usherin;USH2A;ortholog                                                         | extracellular matrix protein(PC00102)                |
| HUMAN HGNC=8087 UniProtKB=P29728     | 2'-5'-oligoadenylate synthase 2;OAS2;ortholog                                  | nucleotidyltransferase(PC00174)                      |
| HUMAN HGNC=169 UniProtKB=P61160      | Actin-related protein 2;ACTR2;ortholog                                         | actin and actin related protein(PC00039)             |
| HUMAN HGNC=20250 UniProtKB=Q96IF1    | LIM domain-containing protein ajuba;AJUBA;ortholog                             | transcription cofactor(PC00217)                      |
| HUMAN HGNC=27937 UniProtKB=Q6ZVH7    | Espin-like protein;ESPNL;ortholog                                              | non-motor actin binding protein(PC00165)             |
| HUMAN HGNC=1093 UniProtKB=P07738     | Bisphosphoglycerate mutase;BPGM;ortholog                                       | mutase(PC00160)                                      |
| HUMAN HGNC=29884 UniProtKB=Q8TF42    | Ubiquitin-associated and SH3 domain-containing protein B;UBASH3B;ortholog      |                                                      |
| HUMAN HGNC=9392 UniProtKB=P31323     | cAMP-dependent protein kinase type II-beta regulatory subunit;PRKAR2B;ortholog | kinase modulator(PC00140)                            |
| HUMAN HGNC=4890 UniProtKB=P36980     | Complement factor H-related protein 2;CFHR2;ortholog                           |                                                      |
| HUMAN HGNC=9782 UniProtKB=P61018     | Ras-related protein Rab-4B;RAB4B;ortholog                                      |                                                      |
| HUMAN HGNC=15487 UniProtKB=Q9H3N1    | Thioredoxin-related transmembrane protein 1;TMX1;ortholog                      |                                                      |
| HUMAN HGNC=1406 UniProtKB=Q9Y698     | Voltage-dependent calcium channel gamma-2 subunit;CACNG2;ortholog              | voltage-gated ion channel(PC00241)                   |

|                                   |                                                                                |                                           |
|-----------------------------------|--------------------------------------------------------------------------------|-------------------------------------------|
| HUMAN HGNC=5253 UniProtKB=P07900  | Heat shock protein HSP 90-alpha;HSP90AA1;ortholog                              | Hsp90 family chaperone(PC00028)           |
| HUMAN HGNC=30688 UniProtKB=Q86VP6 | Cullin-associated NEDD8-dissociated protein 1;CAND1;ortholog                   | ubiquitin-protein ligase(PC00234)         |
| HUMAN HGNC=17292 UniProtKB=Q8IWA5 | Choline transporter-like protein 2;SLC44A2;ortholog                            | secondary carrier transporter(PC00258)    |
| HUMAN HGNC=8738 UniProtKB=Q15113  | Procollagen C-endopeptidase enhancer 1;PCOLCE;ortholog                         | serine protease(PC00203)                  |
| HUMAN HGNC=122 UniProtKB=P24666   | Low molecular weight phosphotyrosine protein phosphatase;ACP1;ortholog         | protein phosphatase(PC00195)              |
| HUMAN HGNC=30168 UniProtKB=Q15084 | Protein disulfide-isomerase A6;PDIA6;ortholog                                  | chaperone(PC00072)                        |
| HUMAN HGNC=8824 UniProtKB=P36955  | Pigment epithelium-derived factor;SERPINF1;ortholog                            | protease inhibitor(PC00191)               |
| HUMAN HGNC=3750 UniProtKB=Q13045  | Protein flightless-1 homolog;FLII;ortholog                                     | non-motor actin binding protein(PC00165)  |
| HUMAN HGNC=16257 UniProtKB=Q9H4B7 | Tubulin beta-1 chain;TUBB1;ortholog                                            | tubulin(PC00228)                          |
| HUMAN HGNC=7803 UniProtKB=Q12986  | Transcriptional repressor NF-X1;NFX1;ortholog                                  | zinc finger transcription factor(PC00244) |
| HUMAN HGNC=17103 UniProtKB=Q9Y5L0 | Transportin-3;TNPO3;ortholog                                                   | transporter(PC00227)                      |
| HUMAN HGNC=19974 UniProtKB=Q8IUC4 | Rhophilin-2;RHPN2;ortholog                                                     | scaffold/adaptor protein(PC00226)         |
| HUMAN HGNC=1690 UniProtKB=O43866  | CD5 antigen-like;CD5L;ortholog                                                 |                                           |
| HUMAN HGNC=17970 UniProtKB=Q9BPZ3 | Polyadenylate-binding protein-interacting protein 2;PAIP2;ortholog             |                                           |
| HUMAN HGNC=333 UniProtKB=P01019   | Angiotensinogen;AGT;ortholog                                                   | protease inhibitor(PC00191)               |
| HUMAN HGNC=121 UniProtKB=O15254   | Peroxisomal acyl-coenzyme A oxidase 3;ACOX3;ortholog                           | oxidoreductase(PC00176)                   |
| HUMAN HGNC=30550 UniProtKB=O60337 | E3 ubiquitin-protein ligase MARCHF6;MARCHF6;ortholog                           | ubiquitin-protein ligase(PC00234)         |
| HUMAN HGNC=29480 UniProtKB=P02750 | Leucine-rich alpha-2-glycoprotein;LRG1;ortholog                                |                                           |
| HUMAN HGNC=28164 UniProtKB=Q96M27 | Protein PRRC1;PRRC1;ortholog                                                   |                                           |
| HUMAN HGNC=4398 UniProtKB=P62879  | Guanine nucleotide-binding protein G(I)/G(S)/G(T) subunit beta-2;GNB2;ortholog | heterotrimeric G-protein(PC00117)         |
| HUMAN HGNC=13531 UniProtKB=Q9Y2Q0 | Phospholipid-transporting ATPase IA;ATP8A1;ortholog                            | primary active transporter(PC00068)       |
| HUMAN HGNC=1455 UniProtKB=P27797  | Calreticulin;CALR;ortholog                                                     | chaperone(PC00072)                        |
| HUMAN HGNC=2898 UniProtKB=P09622  | Dihydrolipoyl dehydrogenase, mitochondrial;DLD;ortholog                        | oxidoreductase(PC00176)                   |
| HUMAN HGNC=18233 UniProtKB=Q8NDB2 | B-cell scaffold protein with ankyrin repeats;BANK1;ortholog                    |                                           |
| HUMAN HGNC=20589 UniProtKB=Q9P0J7 | E3 ubiquitin-protein ligase KCMF1;KCMF1;ortholog                               | ubiquitin-protein ligase(PC00234)         |
| HUMAN HGNC=2239 UniProtKB=Q9UNS2  | COP9 signalosome complex subunit 3;COPS3;ortholog                              | protease(PC00190)                         |
| HUMAN HGNC=23112 UniProtKB=Q8TDW7 | Protocadherin Fat 3;FAT3;ortholog                                              | cadherin(PC00057)                         |

|                                       |                                                                             |                                              |
|---------------------------------------|-----------------------------------------------------------------------------|----------------------------------------------|
| HUMAN HGNC=1704 UniProtKB=Q9UIB8      | SLAM family member 5;CD84;ortholog                                          | immunoglobulin receptor superfamily(PC00124) |
| HUMAN HGNC=15720 UniProtKB=Q13033     | Striatin-3;STRN3;ortholog                                                   |                                              |
| HUMAN HGNC=9317 UniProtKB=P63098      | Calcineurin subunit B type 1;PPP3R1;ortholog                                |                                              |
| HUMAN HGNC=5478 UniProtKB=P01876      | Immunoglobulin heavy constant alpha 1;IGHA1;ortholog                        | immunoglobulin(PC00123)                      |
| HUMAN HGNC=28920 UniProtKB=Q5SW79     | Centrosomal protein of 170 kDa;CEP170;ortholog                              | scaffold/adaptor protein(PC00226)            |
| HUMAN HGNC=2288 UniProtKB=P14406      | Cytochrome c oxidase subunit 7A2, mitochondrial;COX7A2;ortholog             | oxidase(PC00175)                             |
| HUMAN HGNC=19162 UniProtKB=Q9P2P6     | StAR-related lipid transfer protein 9;STARD9;ortholog                       |                                              |
| HUMAN HGNC=16998 UniProtKB=P49755     | Transmembrane emp24 domain-containing protein 10;TMED10;ortholog            | vesicle coat protein(PC00235)                |
| HUMAN HGNC=9857 UniProtKB=P61224      | Ras-related protein Rap-1b;RAP1B;ortholog                                   | small GTPase(PC00208)                        |
| HUMAN HGNC=11937 UniProtKB=P32970     | CD70 antigen;CD70;ortholog                                                  |                                              |
| HUMAN HGNC=7863 UniProtKB=Q13423      | NAD(P) transhydrogenase, mitochondrial;NNT;ortholog                         | dehydrogenase(PC00092)                       |
| HUMAN HGNC=29219 UniProtKB=Q6ZU35     | Capping protein inhibiting regulator of actin dynamics;CRACD;ortholog       |                                              |
| HUMAN HGNC=363 UniProtKB=P27144       | Adenylate kinase 4, mitochondrial;AK4;ortholog                              | nucleotide kinase(PC00172)                   |
| HUMAN HGNC=12203 UniProtKB=A0A075B6N3 | T cell receptor beta variable 24-1;TRBV24-1;ortholog                        |                                              |
| HUMAN HGNC=4141 UniProtKB=P04406      | Glyceraldehyde-3-phosphate dehydrogenase;GAPDH;ortholog                     | dehydrogenase(PC00092)                       |
| HUMAN HGNC=1373 UniProtKB=P00918      | Carbonic anhydrase 2;CA2;ortholog                                           |                                              |
| HUMAN HGNC=1553 UniProtKB=Q13185      | Chromobox protein homolog 3;CBX3;ortholog                                   |                                              |
| HUMAN HGNC=18874 UniProtKB=O43561     | Linker for activation of T-cells family member 1;LAT;ortholog               |                                              |
| HUMAN HGNC=29374 UniProtKB=Q76N11     | Kinase non-catalytic C-lobe domain-containing protein 1;KNDC1;ortholog      | guanyl-nucleotide exchange factor(PC00113)   |
| HUMAN Gene=SEP15 UniProtKB=O60613     | Selenoprotein F;SELENOF;ortholog                                            |                                              |
| HUMAN HGNC=8862 UniProtKB=P10720      | Platelet factor 4 variant;PF4V1;ortholog                                    | chemokine(PC00074)                           |
| HUMAN HGNC=17643 UniProtKB=Q9HD26     | Golgi-associated PDZ and coiled-coil motif-containing protein;GOPC;ortholog | membrane traffic protein(PC00150)            |
| HUMAN HGNC=8647 UniProtKB=Q15365      | Poly(rC)-binding protein 1;PCBP1;ortholog                                   | RNA metabolism protein(PC00031)              |
| HUMAN HGNC=20100 UniProtKB=A0A1B0GTZ2 | Putative coiled-coil domain-containing protein 196;CCDC196;ortholog         |                                              |
| HUMAN HGNC=17089 UniProtKB=Q8NF91     | Nesprin-1;SYNE1;ortholog                                                    |                                              |
| HUMAN HGNC=7326 UniProtKB=P20585      | DNA mismatch repair protein Msh3;MSH3;ortholog                              | DNA metabolism protein(PC00009)              |
| HUMAN HGNC=26951 UniProtKB=Q86YL5     | Testis development-related protein;TDRP;ortholog                            |                                              |

|                                      |                                                                  |                                          |
|--------------------------------------|------------------------------------------------------------------|------------------------------------------|
| HUMAN HGNC=2593 UniProtKB=P05093     | Steroid 17-alpha-hydroxylase/17,20 lyase;CYP17A1;ortholog        |                                          |
| HUMAN HGNC=8941 UniProtKB=P01009     | Alpha-1-antitrypsin;SERPINA1;ortholog                            | protease inhibitor(PC00191)              |
| HUMAN HGNC=1736 UniProtKB=P60953     | Cell division control protein 42 homolog;CDC42;ortholog          | small GTPase(PC00208)                    |
| HUMAN HGNC=12013 UniProtKB=P67936    | Tropomyosin alpha-4 chain;TPM4;ortholog                          | actin binding motor protein(PC00040)     |
| HUMAN HGNC=8878 UniProtKB=Q01813     | ATP-dependent 6-phosphofructokinase, platelet type;PFKP;ortholog | carbohydrate kinase(PC00065)             |
| HUMAN HGNC=5237 UniProtKB=P34932     | Heat shock 70 kDa protein 4;HSPA4;ortholog                       |                                          |
| HUMAN HGNC=533 UniProtKB=P04083      | Annexin A1;ANXA1;ortholog                                        | calcium-binding protein(PC00060)         |
| HUMAN HGNC=21073 UniProtKB=Q8NBS9    | Thioredoxin domain-containing protein 5;TXNDC5;ortholog          | chaperone(PC00072)                       |
| HUMAN HGNC=5927 UniProtKB=P01721     | Immunoglobulin lambda variable 6-57;IGLV6-57;ortholog            | immunoglobulin(PC00123)                  |
| HUMAN HGNC=14247 UniProtKB=O75964    | ATP synthase subunit g, mitochondrial;ATP5MG;ortholog            | ATP synthase(PC00002)                    |
| HUMAN HGNC=8583 UniProtKB=P05121     | Plasminogen activator inhibitor 1;SERPINE1;ortholog              | protease inhibitor(PC00191)              |
| HUMAN HGNC=1117 UniProtKB=Q9UPA5     | Protein bassoon;BSN;ortholog                                     |                                          |
| HUMAN HGNC=10447 UniProtKB=P10301    | Ras-related protein R-Ras;RRAS;ortholog                          | small GTPase(PC00208)                    |
| HUMAN HGNC=5582 UniProtKB=A0A0B4J1V0 | Immunoglobulin heavy variable 3-15;IGHV3-15;ortholog             | immunoglobulin(PC00123)                  |
| HUMAN HGNC=9364 UniProtKB=Q92954     | Proteoglycan 4;PRG4;ortholog                                     |                                          |
| HUMAN HGNC=11319 UniProtKB=P28290    | Protein ITPRID2;ITPRID2;ortholog                                 |                                          |
| HUMAN HGNC=2252 UniProtKB=P31146     | Coronin-1A;CORO1A;ortholog                                       | non-motor actin binding protein(PC00165) |
| HUMAN HGNC=12738 UniProtKB=Q969T9    | WW domain-binding protein 2;WBP2;ortholog                        |                                          |
| HUMAN HGNC=5730 UniProtKB=A0A0C4DH73 | Immunoglobulin kappa variable 1-12;IGKV1-12;ortholog             | immunoglobulin(PC00123)                  |
| HUMAN HGNC=5466 UniProtKB=P01344     | Insulin-like growth factor II;IGF2;ortholog                      | growth factor(PC00112)                   |
| HUMAN HGNC=16948 UniProtKB=Q969H8    | Myeloid-derived growth factor;MYDGF;ortholog                     | growth factor(PC00112)                   |
| HUMAN HGNC=5918 UniProtKB=A0A075B6K5 | Immunoglobulin lambda variable 3-9;IGLV3-9;ortholog              | immunoglobulin(PC00123)                  |
| HUMAN HGNC=26340 UniProtKB=Q32M84    | BTB/POZ domain-containing protein 16;BTBD16;ortholog             |                                          |
| HUMAN HGNC=6461 UniProtKB=Q9NSB2     | Keratin, type II cuticular Hb4;KRT84;ortholog                    |                                          |
| HUMAN HGNC=24552 UniProtKB=Q3LXA3    | Triokinase/FMN cyclase;TKFC;ortholog                             | cyclase(PC00079)                         |
| HUMAN HGNC=29380 UniProtKB=Q96ME7    | Zinc finger protein 512;ZNF512;ortholog                          |                                          |
| HUMAN HGNC=16643 UniProtKB=Q14BN4    | Sarcolemmal membrane-associated protein;SLMAP;ortholog           | scaffold/adaptor protein(PC00226)        |

|                                         |                                                                                    |                                                  |
|-----------------------------------------|------------------------------------------------------------------------------------|--------------------------------------------------|
| HUMAN HGNC=913 UniProtKB=P20160         | Azurocidin;AZU1;ortholog                                                           | serine protease(PC00203)                         |
| HUMAN HGNC=2695 UniProtKB=Q16643        | Drebrin;DBN1;ortholog                                                              | non-motor actin binding protein(PC00165)         |
| HUMAN HGNC=4393 UniProtKB=P11488        | Guanine nucleotide-binding protein G(t) subunit alpha-1;GNAT1;ortholog             | heterotrimeric G-protein(PC00117)                |
| HUMAN HGNC=4888 UniProtKB=Q03591        | Complement factor H-related protein 1;CFHR1;ortholog                               |                                                  |
| HUMAN HGNC=2712 UniProtKB=Q13561        | Dynactin subunit 2;DCTN2;ortholog                                                  | microtubule binding motor protein(PC00156)       |
| HUMAN HGNC=7218 UniProtKB=P05164        | Myeloperoxidase;MPO;ortholog                                                       | peroxidase(PC00180)                              |
| HUMAN Gene=KV311_HUMAN UniProtKB=P04433 | Immunoglobulin kappa variable 3-11;IGKV3-11;ortholog                               | immunoglobulin(PC00123)                          |
| HUMAN HGNC=1663 UniProtKB=P16671        | Platelet glycoprotein 4;CD36;ortholog                                              | membrane trafficking regulatory protein(PC00151) |
| HUMAN HGNC=21295 UniProtKB=Q8TE68       | Epidermal growth factor receptor kinase substrate 8-like protein 1;EPS8L1;ortholog | scaffold/adaptor protein(PC00226)                |
| HUMAN HGNC=8710 UniProtKB=Q9Y5G1        | Protocadherin gamma-B3;PCDHGB3;ortholog                                            | cadherin(PC00057)                                |
| HUMAN HGNC=3551 UniProtKB=P00740        | Coagulation factor IX;F9;ortholog                                                  | serine protease(PC00203)                         |
| HUMAN HGNC=16272 UniProtKB=Q96JK9       | Mastermind-like protein 3;MAML3;ortholog                                           | transcription cofactor(PC00217)                  |
| HUMAN HGNC=10898 UniProtKB=Q15477       | Helicase SKI2W;SKIV2L;ortholog                                                     | DNA metabolism protein(PC00009)                  |
| HUMAN HGNC=19860 UniProtKB=Q8NCU1       | Uncharacterized protein CCDC197;CCDC197;ortholog                                   |                                                  |
| HUMAN HGNC=26068 UniProtKB=Q6IAA8       | Ragulator complex protein LAMTOR1;LAMTOR1;ortholog                                 |                                                  |
| HUMAN HGNC=10432 UniProtKB=P51812       | Ribosomal protein S6 kinase alpha-3;RPS6KA3;ortholog                               | protein modifying enzyme(PC00260)                |
| HUMAN HGNC=5929 UniProtKB=P04211        | Immunoglobulin lambda variable 7-43;IGLV7-43;ortholog                              | immunoglobulin(PC00123)                          |
| HUMAN HGNC=8993 UniProtKB=P12273        | Prolactin-inducible protein;PIP;ortholog                                           |                                                  |
| HUMAN HGNC=30140 UniProtKB=A7MCY6       | TANK-binding kinase 1-binding protein 1;TBKBP1;ortholog                            |                                                  |
| HUMAN HGNC=17859 UniProtKB=Q5SRE5       | Nucleoporin NUP188 homolog;NUP188;ortholog                                         |                                                  |
| HUMAN HGNC=1623 UniProtKB=P50990        | T-complex protein 1 subunit theta;CCT8;ortholog                                    | chaperonin(PC00073)                              |
| HUMAN HGNC=6416 UniProtKB=P02533        | Keratin, type I cytoskeletal 14;KRT14;ortholog                                     |                                                  |
| HUMAN HGNC=21726 UniProtKB=Q96PE2       | Rho guanine nucleotide exchange factor 17;ARHGEF17;ortholog                        | guanyl-nucleotide exchange factor(PC00113)       |
| HUMAN HGNC=692 UniProtKB=P40616         | ADP-ribosylation factor-like protein 1;ARL1;ortholog                               | G-protein(PC00020)                               |
| HUMAN HGNC=5743 UniProtKB=A0A0C4DH67    | Immunoglobulin kappa variable 1-8;IGKV1-8;ortholog                                 | immunoglobulin(PC00123)                          |
| HUMAN HGNC=3285 UniProtKB=P23588        | Eukaryotic translation initiation factor 4B;EIF4B;ortholog                         | translation initiation factor(PC00224)           |

|                                      |                                                                              |                                                                  |
|--------------------------------------|------------------------------------------------------------------------------|------------------------------------------------------------------|
| HUMAN HGNC=23117 UniProtKB=Q6UWF7    | NXPE family member 4;NXPE4;ortholog                                          |                                                                  |
| HUMAN HGNC=15687 UniProtKB=O75563    | Src kinase-associated phosphoprotein 2;SKAP2;ortholog                        | scaffold/adaptor protein(PC00226)                                |
| HUMAN HGNC=9565 UniProtKB=P51665     | 26S proteasome non-ATPase regulatory subunit 7;PSMD7;ortholog                | translation initiation factor(PC00224)                           |
| HUMAN HGNC=6925 UniProtKB=P02686     | Myelin basic protein;MBP;ortholog                                            | myelin protein(PC00161)                                          |
| HUMAN HGNC=11446 UniProtKB=O00186    | Syntaxin-binding protein 3;STXBP3;ortholog                                   | membrane trafficking regulatory protein(PC00151)                 |
| HUMAN HGNC=20165 UniProtKB=Q9P2P1    | Protein NYNRIN;NYNRIN;ortholog                                               | endoribonuclease(PC00094)                                        |
| HUMAN HGNC=20514 UniProtKB=Q8N257    | Histone H2B type 3-B;H2BU1;ortholog                                          | histone(PC00118)                                                 |
| HUMAN HGNC=14111 UniProtKB=Q9HC38    | Glyoxalase domain-containing protein 4;GLOD4;ortholog                        |                                                                  |
| HUMAN HGNC=2300 UniProtKB=Q96IY4     | Carboxypeptidase B2;CPB2;ortholog                                            | metalloprotease(PC00153)                                         |
| HUMAN HGNC=3481 UniProtKB=P13804     | Electron transfer flavoprotein subunit alpha, mitochondrial;ETFa;ortholog    | oxidoreductase(PC00176)                                          |
| HUMAN HGNC=4390 UniProtKB=P50148     | Guanine nucleotide-binding protein G(q) subunit alpha;GNAQ;ortholog          | heterotrimeric G-protein(PC00117)                                |
| HUMAN HGNC=3230 UniProtKB=Q9NYQ7     | Cadherin EGF LAG seven-pass G-type receptor 3;CELSR3;ortholog                | cadherin(PC00057)                                                |
| HUMAN HGNC=5617 UniProtKB=A0A075B6Q5 | Immunoglobulin heavy variable 3-64;IGHV3-64;ortholog                         | immunoglobulin(PC00123)                                          |
| HUMAN HGNC=12022 UniProtKB=P13693    | Translationally-controlled tumor protein;TPT1;ortholog                       | non-motor microtubule binding protein(PC00166)                   |
| HUMAN HGNC=16075 UniProtKB=Q9H082    | Ras-related protein Rab-33B;RAB33B;ortholog                                  |                                                                  |
| HUMAN HGNC=3537 UniProtKB=P25116     | Proteinase-activated receptor 1;F2R;ortholog                                 | G-protein coupled receptor(PC00021)                              |
| HUMAN HGNC=15818 UniProtKB=Q9H0Z9    | RNA-binding protein 38;RBM38;ortholog                                        |                                                                  |
| HUMAN HGNC=8575 UniProtKB=P68402     | Platelet-activating factor acetylhydrolase IB subunit beta;PAFAH1B2;ortholog | protein modifying enzyme(PC00260)                                |
| HUMAN HGNC=5604 UniProtKB=A0A0B4J1X8 | Immunoglobulin heavy variable 3-43;IGHV3-43;ortholog                         | immunoglobulin(PC00123)                                          |
| HUMAN HGNC=14683 UniProtKB=Q9Y2G5    | GDP-fucose protein O-fucosyltransferase 2;POFUT2;ortholog                    | glycosyltransferase(PC00111)                                     |
| HUMAN HGNC=30535 UniProtKB=Q8WVJ2    | NudC domain-containing protein 2;NUDCD2;ortholog                             | microtubule or microtubule-binding cytoskeletal protein(PC00157) |
| HUMAN HGNC=29158 UniProtKB=Q9Y2G9    | Protein strawberry notch homolog 2;SBNO2;ortholog                            |                                                                  |
| HUMAN HGNC=1618 UniProtKB=P48643     | T-complex protein 1 subunit epsilon;CCT5;ortholog                            | chaperonin(PC00073)                                              |
| HUMAN HGNC=9750 UniProtKB=P20742     | Pregnancy zone protein;PZP;ortholog                                          | protease inhibitor(PC00191)                                      |
| HUMAN HGNC=620 UniProtKB=P05067      | Amyloid-beta precursor protein;APP;ortholog                                  | protease inhibitor(PC00191)                                      |

|                                      |                                                                                  |                                            |
|--------------------------------------|----------------------------------------------------------------------------------|--------------------------------------------|
| HUMAN HGNC=1173 UniProtKB=Q5H9R7     | Serine/threonine-protein phosphatase 6 regulatory subunit 3;PPP6R3;ortholog      | phosphatase modulator(PC00184)             |
| HUMAN HGNC=9353 UniProtKB=P32119     | Peroxiredoxin-2;PRDX2;ortholog                                                   | peroxidase(PC00180)                        |
| HUMAN HGNC=4234 UniProtKB=P55040     | GTP-binding protein GEM;GEM;ortholog                                             |                                            |
| HUMAN HGNC=11594 UniProtKB=Q96SF7    | T-box transcription factor TBX15;TBX15;ortholog                                  | Rel homology transcription factor(PC00252) |
| HUMAN HGNC=7665 UniProtKB=O43639     | Cytoplasmic protein NCK2;NCK2;ortholog                                           | scaffold/adaptor protein(PC00226)          |
| HUMAN HGNC=15902 UniProtKB=Q8IXH8    | Cadherin-like protein 26;CDH26;ortholog                                          | cadherin(PC00057)                          |
| HUMAN HGNC=19983 UniProtKB=Q86YS6    | Ras-related protein Rab-43;RAB43;ortholog                                        |                                            |
| HUMAN HGNC=5931 UniProtKB=A0A075B6I0 | Immunoglobulin lambda variable 8-61;IGLV8-61;ortholog                            | immunoglobulin(PC00123)                    |
| HUMAN HGNC=1062 UniProtKB=P53004     | Biliverdin reductase A;BLVRA;ortholog                                            | dehydrogenase(PC00092)                     |
| HUMAN HGNC=7642 UniProtKB=Q99747     | Gamma-soluble NSF attachment protein;NAPG;ortholog                               | membrane traffic protein(PC00150)          |
| HUMAN HGNC=21354 UniProtKB=Q86XR7    | TIR domain-containing adapter molecule 2;TICAM2;ortholog                         | vesicle coat protein(PC00235)              |
| HUMAN HGNC=25573 UniProtKB=Q8IYD2    | Kelch domain-containing protein 8A;KLHDC8A;ortholog                              |                                            |
| HUMAN HGNC=23410 UniProtKB=Q969X1    | Protein lifeguard 3;TM6IM1;ortholog                                              |                                            |
| HUMAN HGNC=11429 UniProtKB=O75558    | Syntaxin-11;STX11;ortholog                                                       | SNARE protein(PC00034)                     |
| HUMAN HGNC=6400 UniProtKB=Q14974     | Importin subunit beta-1;KPNB1;ortholog                                           | transporter(PC00227)                       |
| HUMAN HGNC=4622 UniProtKB=Q8IYD1     | Eukaryotic peptide chain release factor GTP-binding subunit ERF3B;GSPT2;ortholog | translation factor(PC00223)                |
| HUMAN HGNC=25135 UniProtKB=Q6UWE0    | E3 ubiquitin-protein ligase LRSAM1;LRSAM1;ortholog                               |                                            |
| HUMAN HGNC=6564 UniProtKB=Q08380     | Galectin-3-binding protein;LGALS3BP;ortholog                                     |                                            |
| HUMAN HGNC=851 UniProtKB=P38606      | V-type proton ATPase catalytic subunit A;ATP6V1A;ortholog                        | ATP synthase(PC00002)                      |
| HUMAN HGNC=1318 UniProtKB=P01024     | Complement C3;C3;ortholog                                                        | protease inhibitor(PC00191)                |
| HUMAN HGNC=16391 UniProtKB=Q9H257    | Caspase recruitment domain-containing protein 9;CARD9;ortholog                   |                                            |
| HUMAN HGNC=15842 UniProtKB=Q96RT1    | Erbin;ERBIN;ortholog                                                             | scaffold/adaptor protein(PC00226)          |
| HUMAN HGNC=25272 UniProtKB=Q8TBB5    | Kelch domain-containing protein 4;KLHDC4;ortholog                                |                                            |
| HUMAN Gene=EIF2S3L UniProtKB=Q2VIR3  | Eukaryotic translation initiation factor 2 subunit 3B;EIF2S3B;ortholog           | translation initiation factor(PC00224)     |
| HUMAN HGNC=14451 UniProtKB=Q9BQK8    | Phosphatidate phosphatase LPIN3;LPIN3;ortholog                                   |                                            |
| HUMAN HGNC=5145 UniProtKB=P37235     | Hippocalcin-like protein 1;HPCAL1;ortholog                                       |                                            |
| HUMAN HGNC=24254 UniProtKB=Q96CN7    | Isochorismatase domain-containing protein 1;ISOC1;ortholog                       | hydrolase(PC00121)                         |

|                                   |                                                                                           |                                                       |
|-----------------------------------|-------------------------------------------------------------------------------------------|-------------------------------------------------------|
| HUMAN HGNC=2253 UniProtKB=Q9BR76  | Coronin-1B;CORO1B;ortholog                                                                | non-motor actin binding protein(PC00165)              |
| HUMAN HGNC=16925 UniProtKB=Q96P48 | Arf-GAP with Rho-GAP domain, ANK repeat and PH domain-containing protein 1;ARAP1;ortholog | GTPase-activating protein(PC00257)                    |
| HUMAN HGNC=3423 UniProtKB=P11678  | Eosinophil peroxidase;EPX;ortholog                                                        | peroxidase(PC00180)                                   |
| HUMAN HGNC=1133 UniProtKB=Q06187  | Tyrosine-protein kinase BTK;BTK;ortholog                                                  |                                                       |
| HUMAN HGNC=9075 UniProtKB=P08697  | Alpha-2-antiplasmin;SERPINF2;ortholog                                                     | protease inhibitor(PC00191)                           |
| HUMAN HGNC=17177 UniProtKB=Q8IUI8 | Cytokine receptor-like factor 3;CRLF3;ortholog                                            | DNA metabolism protein(PC00009)                       |
| HUMAN HGNC=11756 UniProtKB=Q03403 | Trefoil factor 2;TFF2;ortholog                                                            | intercellular signal molecule(PC00207)                |
| HUMAN HGNC=5880 UniProtKB=P01700  | Immunoglobulin lambda variable 1-47;IGLV1-47;ortholog                                     | immunoglobulin(PC00123)                               |
| HUMAN HGNC=6444 UniProtKB=P04259  | Keratin, type II cytoskeletal 6B;KRT6B;ortholog                                           |                                                       |
| HUMAN HGNC=17904 UniProtKB=Q9NRR4 | Ribonuclease 3;DROSHA;ortholog                                                            | endoribonuclease(PC00094)                             |
| HUMAN HGNC=39025 UniProtKB=Q9QC07 | Endogenous retrovirus group K member 18 Pol protein;ERVK-18;ortholog                      | viral or transposable element protein(PC00237)        |
| HUMAN HGNC=23594 UniProtKB=Q709C8 | Vacuolar protein sorting-associated protein 13C;VPS13C;ortholog                           | membrane traffic protein(PC00150)                     |
| HUMAN HGNC=453 UniProtKB=P02760   | Protein AMBP;AMBP;ortholog                                                                |                                                       |
| HUMAN HGNC=10305 UniProtKB=P50914 | 60S ribosomal protein L14;RPL14;ortholog                                                  | ribosomal protein(PC00202)                            |
| HUMAN HGNC=4433 UniProtKB=P00505  | Aspartate aminotransferase, mitochondrial;GOT2;ortholog                                   | transaminase(PC00216)                                 |
| HUMAN HGNC=19100 UniProtKB=Q5VWK5 | Interleukin-23 receptor;IL23R;ortholog                                                    | transmembrane signal receptor(PC00197)                |
| HUMAN HGNC=25268 UniProtKB=Q96LR9 | Apolipoprotein L domain-containing protein 1;APOLD1;ortholog                              | apolipoprotein(PC00052)                               |
| HUMAN HGNC=163 UniProtKB=P12814   | Alpha-actinin-1;ACTN1;ortholog                                                            |                                                       |
| HUMAN HGNC=3542 UniProtKB=P12259  | Coagulation factor V;F5;ortholog                                                          | oxidoreductase(PC00176)                               |
| HUMAN HGNC=18370 UniProtKB=Q9H0U4 | Ras-related protein Rab-1B;RAB1B;ortholog                                                 |                                                       |
| HUMAN HGNC=21213 UniProtKB=Q5TH69 | Brefeldin A-inhibited guanine nucleotide-exchange protein 3;ARFGEF3;ortholog              | guanyl-nucleotide exchange factor(PC00113)            |
| HUMAN HGNC=10385 UniProtKB=P25398 | 40S ribosomal protein S12;RPS12;ortholog                                                  | ribosomal protein(PC00202)                            |
| HUMAN HGNC=3311 UniProtKB=P30740  | Leukocyte elastase inhibitor;SERPINB1;ortholog                                            | protease inhibitor(PC00191)                           |
| HUMAN HGNC=6840 UniProtKB=Q02750  | Dual specificity mitogen-activated protein kinase 1;MAP2K1;ortholog                       | non-receptor serine/threonine protein kinase(PC00167) |
| HUMAN HGNC=4045 UniProtKB=O75084  | Frizzled-7;FZD7;ortholog                                                                  | transmembrane signal receptor(PC00197)                |
| HUMAN HGNC=17712 UniProtKB=O15304 | Apoptosis regulatory protein Siva;SIVA1;ortholog                                          |                                                       |



|                                   |                                                                                        |                                            |
|-----------------------------------|----------------------------------------------------------------------------------------|--------------------------------------------|
| HUMAN HGNC=13726 UniProtKB=Q8NEZ4 | Histone-lysine N-methyltransferase 2C;KMT2C;ortholog                                   |                                            |
| HUMAN HGNC=7910 UniProtKB=P06748  | Nucleophosmin;NPM1;ortholog                                                            | chaperone(PC00072)                         |
| HUMAN HGNC=14871 UniProtKB=Q96A00 | Protein phosphatase 1 regulatory subunit 14A;PPP1R14A;ortholog                         | phosphatase modulator(PC00184)             |
| HUMAN HGNC=9840 UniProtKB=P11234  | Ras-related protein Ral-B;RALB;ortholog                                                | small GTPase(PC00208)                      |
| HUMAN HGNC=24550 UniProtKB=Q9H8H3 | Methyltransferase-like protein 7A;METTL7A;ortholog                                     | methyltransferase(PC00155)                 |
| HUMAN HGNC=1622 UniProtKB=Q99832  | T-complex protein 1 subunit eta;CCT7;ortholog                                          | chaperonin(PC00073)                        |
| HUMAN HGNC=11881 UniProtKB=P62328 | Thymosin beta-4;TMSB4X;ortholog                                                        |                                            |
| HUMAN HGNC=3331 UniProtKB=P50402  | Emerin;EMD;ortholog                                                                    |                                            |
| HUMAN HGNC=11845 UniProtKB=Q9Y490 | Talin-1;TLN1;ortholog                                                                  |                                            |
| HUMAN HGNC=11119 UniProtKB=Q99835 | Smoothened homolog;SMO;ortholog                                                        | transmembrane signal receptor(PC00197)     |
| HUMAN HGNC=16961 UniProtKB=Q15762 | CD226 antigen;CD226;ortholog                                                           |                                            |
| HUMAN HGNC=6401 UniProtKB=Q92973  | Transportin-1;TNPO1;ortholog                                                           | transporter(PC00227)                       |
| HUMAN HGNC=11275 UniProtKB=Q01082 | Spectrin beta chain, non-erythrocytic 1;SPTBN1;ortholog                                |                                            |
| HUMAN HGNC=2295 UniProtKB=P00450  | Ceruloplasmin;CP;ortholog                                                              | oxidase(PC00175)                           |
| HUMAN HGNC=10382 UniProtKB=P04844 | Dolichyl-diphosphooligosaccharide--protein glycosyltransferase subunit 2;RPN2;ortholog | glycosyltransferase(PC00111)               |
| HUMAN HGNC=1441 UniProtKB=Q05682  | Caldesmon;CALD1;ortholog                                                               | non-motor actin binding protein(PC00165)   |
| HUMAN HGNC=10594 UniProtKB=Q01118 | Sodium channel protein type 7 subunit alpha;SCN7A;ortholog                             | voltage-gated ion channel(PC00241)         |
| HUMAN HGNC=12851 UniProtKB=P62258 | 14-3-3 protein epsilon;YWHAE;ortholog                                                  | scaffold/adaptor protein(PC00226)          |
| HUMAN HGNC=6138 UniProtKB=P08514  | Integrin alpha-IIb;ITGA2B;ortholog                                                     | integrin(PC00126)                          |
| HUMAN HGNC=9879 UniProtKB=Q7LDG7  | RAS guanyl-releasing protein 2;RASGRP2;ortholog                                        | guanyl-nucleotide exchange factor(PC00113) |
| HUMAN HGNC=4187 UniProtKB=P02774  | Vitamin D-binding protein;GC;ortholog                                                  | transfer/carrier protein(PC00219)          |
| HUMAN HGNC=469 UniProtKB=Q01433   | AMP deaminase 2;AMPD2;ortholog                                                         | deaminase(PC00088)                         |
| HUMAN HGNC=4755 UniProtKB=Q93079  | Histone H2B type 1-H;H2BC9;ortholog                                                    | histone(PC00118)                           |
| HUMAN HGNC=15461 UniProtKB=P55145 | Mesencephalic astrocyte-derived neurotrophic factor;MANF;ortholog                      |                                            |
| HUMAN HGNC=12726 UniProtKB=P04275 | von Willebrand factor;VWF;ortholog                                                     | extracellular matrix protein(PC00102)      |
| HUMAN HGNC=8784 UniProtKB=O76074  | cGMP-specific 3',5'-cyclic phosphodiesterase;PDE5A;ortholog                            | phosphodiesterase(PC00185)                 |

|                                   |                                                                             |                                                                  |
|-----------------------------------|-----------------------------------------------------------------------------|------------------------------------------------------------------|
| HUMAN HGNC=9381 UniProtKB=P22694  | cAMP-dependent protein kinase catalytic subunit beta;PRKACB;ortholog        | non-receptor serine/threonine protein kinase(PC00167)            |
| HUMAN HGNC=4606 UniProtKB=P30101  | Protein disulfide-isomerase A3;PDIA3;ortholog                               | chaperone(PC00072)                                               |
| HUMAN HGNC=15476 UniProtKB=P63167 | Dynein light chain 1, cytoplasmic;DYNLL1;ortholog                           | microtubule or microtubule-binding cytoskeletal protein(PC00157) |
| HUMAN HGNC=9540 UniProtKB=P49720  | Proteasome subunit beta type-3;PSMB3;ortholog                               | protease(PC00190)                                                |
| HUMAN HGNC=13506 UniProtKB=Q8TBJ5 | Fez family zinc finger protein 2;FEZF2;ortholog                             | C2H2 zinc finger transcription factor(PC00248)                   |
| HUMAN HGNC=2951 UniProtKB=Q9C0G6  | Dynein heavy chain 6, axonemal;DNAH6;ortholog                               | microtubule binding motor protein(PC00156)                       |
| HUMAN HGNC=4248 UniProtKB=Q92820  | Gamma-glutamyl hydrolase;GGH;ortholog                                       | cysteine protease(PC00081)                                       |
| HUMAN HGNC=14952 UniProtKB=Q8TAE6 | Protein phosphatase 1 regulatory subunit 14C;PPP1R14C;ortholog              | phosphatase modulator(PC00184)                                   |
| HUMAN HGNC=3611 UniProtKB=P30273  | High affinity immunoglobulin epsilon receptor subunit gamma;FCER1G;ortholog | immunoglobulin receptor superfamily(PC00124)                     |
| HUMAN HGNC=17772 UniProtKB=Q99757 | Thioredoxin, mitochondrial;TXN2;ortholog                                    | oxidoreductase(PC00176)                                          |
| HUMAN HGNC=7237 UniProtKB=Q9Y6F6  | Inositol 1,4,5-triphosphate receptor associated 1;IRAG1;ortholog            | scaffold/adaptor protein(PC00226)                                |
| HUMAN HGNC=3151 UniProtKB=P30084  | Enoyl-CoA hydratase, mitochondrial;ECHS1;ortholog                           | hydratase(PC00120)                                               |
| HUMAN HGNC=4750 UniProtKB=Q99879  | Histone H2B type 1-M;H2BC14;ortholog                                        | histone(PC00118)                                                 |
| HUMAN HGNC=15855 UniProtKB=Q9NPY3 | Complement component C1q receptor;CD93;ortholog                             | extracellular matrix structural protein(PC00103)                 |
| HUMAN HGNC=1122 UniProtKB=P43251  | Biotinidase;BTD;ortholog                                                    | hydrolase(PC00121)                                               |
| HUMAN HGNC=414 UniProtKB=P04075   | Fructose-bisphosphate aldolase A;ALDOA;ortholog                             | aldolase(PC00044)                                                |
| HUMAN HGNC=5746 UniProtKB=P01611  | Immunoglobulin kappa variable 1D-12;IGKV1D-12;ortholog                      | immunoglobulin(PC00123)                                          |
| HUMAN HGNC=19312 UniProtKB=Q56P03 | E2F-associated phosphoprotein;EAPP;ortholog                                 |                                                                  |
| HUMAN HGNC=27146 UniProtKB=Q5TA31 | E3 ubiquitin-protein ligase RNF187;RNF187;ortholog                          | ubiquitin-protein ligase(PC00234)                                |
| HUMAN HGNC=5006 UniProtKB=P04035  | 3-hydroxy-3-methylglutaryl-coenzyme A reductase;HMGCR;ortholog              | reductase(PC00198)                                               |
| HUMAN HGNC=18985 UniProtKB=Q7Z4W1 | L-xylulose reductase;DCXR;ortholog                                          | reductase(PC00198)                                               |
| HUMAN HGNC=3208 UniProtKB=P24534  | Elongation factor 1-beta;EEF1B2;ortholog                                    | translation elongation factor(PC00222)                           |
| HUMAN HGNC=4456 UniProtKB=P43304  | Glycerol-3-phosphate dehydrogenase, mitochondrial;GPD2;ortholog             | dehydrogenase(PC00092)                                           |
| HUMAN HGNC=9411 UniProtKB=P14314  | Glucosidase 2 subunit beta;PRKCSH;ortholog                                  | protein-binding activity modulator(PC00095)                      |

|                                      |                                                                                       |                                          |
|--------------------------------------|---------------------------------------------------------------------------------------|------------------------------------------|
| HUMAN HGNC=24718 UniProtKB=Q96JJ7    | Protein disulfide-isomerase TMX3;TMX3;ortholog                                        | chaperone(PC00072)                       |
| HUMAN HGNC=12690 UniProtKB=P09327    | Villin-1;VIL1;ortholog                                                                | non-motor actin binding protein(PC00165) |
| HUMAN HGNC=2062 UniProtKB=O00299     | Chloride intracellular channel protein 1;CLIC1;ortholog                               | ion channel(PC00133)                     |
| HUMAN HGNC=11172 UniProtKB=Q13596    | Sorting nexin-1;SNX1;ortholog                                                         | scaffold/adaptor protein(PC00226)        |
| HUMAN HGNC=3711 UniProtKB=P62942     | Peptidyl-prolyl cis-trans isomerase FKBP1A;FKBP1A;ortholog                            | chaperone(PC00072)                       |
| HUMAN HGNC=20954 UniProtKB=Q9NP79    | Vacuolar protein sorting-associated protein VTA1 homolog;VTA1;ortholog                | membrane traffic protein(PC00150)        |
| HUMAN HGNC=705 UniProtKB=O15144      | Actin-related protein 2/3 complex subunit 2;ARPC2;ortholog                            |                                          |
| HUMAN HGNC=17821 UniProtKB=O00148    | ATP-dependent RNA helicase DDX39A;DDX39A;ortholog                                     |                                          |
| HUMAN HGNC=4829 UniProtKB=P02042     | Hemoglobin subunit delta;HBD;ortholog                                                 |                                          |
| HUMAN HGNC=1449 UniProtKB=P0DP25     | Calmodulin-3;CALM3;ortholog                                                           | calmodulin-related(PC00061)              |
| HUMAN HGNC=2720 UniProtKB=Q9ULH1     | Arf-GAP with SH3 domain, ANK repeat and PH domain-containing protein 1;ASAP1;ortholog |                                          |
| HUMAN HGNC=23169 UniProtKB=Q9Y224    | RNA transcription, translation and transport factor protein;RTRAF;ortholog            |                                          |
| HUMAN HGNC=5633 UniProtKB=A0A075B7D8 | Ig-like domain-containing protein;IGHV3OR15-7;ortholog                                | immunoglobulin(PC00123)                  |
| HUMAN HGNC=5821 UniProtKB=A0A075B6H7 | Probable non-functional immunoglobulin kappa variable 3-7;IGKV3-7;ortholog            | immunoglobulin(PC00123)                  |
| HUMAN HGNC=4242 UniProtKB=O94808     | Glutamine--fructose-6-phosphate aminotransferase [isomerizing] 2;GFPT2;ortholog       | transaminase(PC00216)                    |
| HUMAN HGNC=18344 UniProtKB=Q9BX68    | Histidine triad nucleotide-binding protein 2, mitochondrial;HINT2;ortholog            | nucleotide phosphatase(PC00173)          |
| HUMAN HGNC=9465 UniProtKB=P11908     | Ribose-phosphate pyrophosphokinase 2;PRPS2;ortholog                                   | nucleotide kinase(PC00172)               |
| HUMAN HGNC=1516 UniProtKB=P04040     | Catalase;CAT;ortholog                                                                 | peroxidase(PC00180)                      |
| HUMAN HGNC=5156 UniProtKB=P00739     | Haptoglobin-related protein;HPR;ortholog                                              | serine protease(PC00203)                 |
| HUMAN HGNC=4057 UniProtKB=P11413     | Glucose-6-phosphate 1-dehydrogenase;G6PD;ortholog                                     | dehydrogenase(PC00092)                   |
| HUMAN HGNC=10823 UniProtKB=O75368    | SH3 domain-binding glutamic acid-rich-like protein;SH3BGRL;ortholog                   |                                          |
| HUMAN HGNC=8527 UniProtKB=P55809     | Succinyl-CoA:3-ketoacid coenzyme A transferase 1, mitochondrial;OXCT1;ortholog        | transferase(PC00220)                     |
| HUMAN HGNC=29557 UniProtKB=Q0ZGT2    | Nexilin;NEXN;ortholog                                                                 | scaffold/adaptor protein(PC00226)        |
| HUMAN HGNC=9635 UniProtKB=Q12974     | Protein tyrosine phosphatase type IVA 2;PTP4A2;ortholog                               | protein phosphatase(PC00195)             |
| HUMAN HGNC=5756 UniProtKB=P04432     | Immunoglobulin kappa variable 1D-39;IGKV1D-39;ortholog                                | immunoglobulin(PC00123)                  |
| HUMAN HGNC=9992 UniProtKB=O43665     | Regulator of G-protein signaling 10;RGS10;ortholog                                    |                                          |
| HUMAN HGNC=3702 UniProtKB=Q13642     | Four and a half LIM domains protein 1;FHL1;ortholog                                   |                                          |

|                                   |                                                                             |                                                       |
|-----------------------------------|-----------------------------------------------------------------------------|-------------------------------------------------------|
| HUMAN HGNC=29534 UniProtKB=Q9BSJ8 | Extended synaptotagmin-1;ESYT1;ortholog                                     |                                                       |
| HUMAN HGNC=24641 UniProtKB=Q7Z3J2 | VPS35 endosomal protein sorting factor-like;VPS35L;ortholog                 |                                                       |
| HUMAN HGNC=28771 UniProtKB=Q9BVC6 | Transmembrane protein 109;TMEM109;ortholog                                  |                                                       |
| HUMAN HGNC=5036 UniProtKB=Q14103  | Heterogeneous nuclear ribonucleoprotein D0;HNRNPD;ortholog                  |                                                       |
| HUMAN HGNC=2734 UniProtKB=Q92499  | ATP-dependent RNA helicase DDX1;DDX1;ortholog                               |                                                       |
| HUMAN HGNC=1801 UniProtKB=O95674  | Phosphatidate cytidyltransferase 2;CDS2;ortholog                            | transferase(PC00220)                                  |
| HUMAN HGNC=4684 UniProtKB=P33402  | Guanylate cyclase soluble subunit alpha-2;GUCY1A2;ortholog                  | guanylate cyclase(PC00114)                            |
| HUMAN HGNC=20635 UniProtKB=Q14997 | Proteasome activator complex subunit 4;PSME4;ortholog                       |                                                       |
| HUMAN HGNC=12841 UniProtKB=P07947 | Tyrosine-protein kinase Yes;YES1;ortholog                                   |                                                       |
| HUMAN HGNC=11034 UniProtKB=Q2Y0W8 | Electroneutral sodium bicarbonate exchanger 1;SLC4A8;ortholog               | secondary carrier transporter(PC00258)                |
| HUMAN HGNC=9355 UniProtKB=P30044  | Peroxiredoxin-5, mitochondrial;PRDX5;ortholog                               | oxidoreductase(PC00176)                               |
| HUMAN HGNC=10869 UniProtKB=Q92185 | Alpha-N-acetylneuraminide alpha-2,8-sialyltransferase;ST8SIA1;ortholog      | transferase(PC00220)                                  |
| HUMAN HGNC=885 UniProtKB=O75882   | Attractin;ATRN;ortholog                                                     | extracellular matrix protein(PC00102)                 |
| HUMAN HGNC=4623 UniProtKB=P00390  | Glutathione reductase, mitochondrial;GSR;ortholog                           | reductase(PC00198)                                    |
| HUMAN HGNC=11274 UniProtKB=P11277 | Spectrin beta chain, erythrocytic;SPTB;ortholog                             |                                                       |
| HUMAN HGNC=7967 UniProtKB=Q96R11  | Bile acid receptor;NR1H4;ortholog                                           | C4 zinc finger nuclear receptor(PC00169)              |
| HUMAN HGNC=26525 UniProtKB=Q6P387 | Uncharacterized protein C16orf46;C16orf46;ortholog                          |                                                       |
| HUMAN HGNC=17059 UniProtKB=Q9NTJ5 | Phosphatidylinositol-3-phosphatase SAC1;SACM1L;ortholog                     | phosphatase(PC00181)                                  |
| HUMAN HGNC=24013 UniProtKB=Q5QJE6 | Deoxynucleotidyltransferase terminal-interacting protein 2;DNTTIP2;ortholog |                                                       |
| HUMAN HGNC=18587 UniProtKB=O94901 | SUN domain-containing protein 1;SUN1;ortholog                               | non-motor microtubule binding protein(PC00166)        |
| HUMAN HGNC=12401 UniProtKB=P33981 | Dual specificity protein kinase TTK;TTK;ortholog                            | non-receptor serine/threonine protein kinase(PC00167) |
| HUMAN HGNC=3754 UniProtKB=P21333  | Filamin-A;FLNA;ortholog                                                     |                                                       |
| HUMAN HGNC=17038 UniProtKB=Q99685 | Monoglyceride lipase;MGLL;ortholog                                          | phospholipase(PC00186)                                |
| HUMAN HGNC=3214 UniProtKB=P13639  | Elongation factor 2;EEF2;ortholog                                           | translation elongation factor(PC00222)                |
| HUMAN HGNC=32060 UniProtKB=Q5TEC6 | Histone H3;H3-2;ortholog                                                    | histone(PC00118)                                      |
| HUMAN HGNC=9537 UniProtKB=P20618  | Proteasome subunit beta type-1;PSMB1;ortholog                               | protease(PC00190)                                     |

|                                      |                                                                                         |                                                |
|--------------------------------------|-----------------------------------------------------------------------------------------|------------------------------------------------|
| HUMAN HGNC=26533 UniProtKB=Q96M83    | Coiled-coil domain-containing protein 7;CCDC7;ortholog                                  |                                                |
| HUMAN HGNC=1458 UniProtKB=O43852     | Calumenin;CALU;ortholog                                                                 | calmodulin-related(PC00061)                    |
| HUMAN HGNC=6902 UniProtKB=O00187     | Mannan-binding lectin serine protease 2;MASP2;ortholog                                  | serine protease(PC00203)                       |
| HUMAN HGNC=4566 UniProtKB=P62993     | Growth factor receptor-bound protein 2;GRB2;ortholog                                    |                                                |
| HUMAN HGNC=11491 UniProtKB=P43405    | Tyrosine-protein kinase SYK;SYK;ortholog                                                |                                                |
| HUMAN HGNC=3200 UniProtKB=Q5VTE0     | Putative elongation factor 1-alpha-like 3;EEF1A1P5;ortholog                             | translation factor(PC00223)                    |
| HUMAN HGNC=18411 UniProtKB=Q3KNW1    | Zinc finger protein SNAI3;SNAI3;ortholog                                                | C2H2 zinc finger transcription factor(PC00248) |
| HUMAN HGNC=26212 UniProtKB=P61009    | Signal peptidase complex subunit 3;SPCS3;ortholog                                       | protease(PC00190)                              |
| HUMAN HGNC=8498 UniProtKB=P02763     | Alpha-1-acid glycoprotein 1;ORM1;ortholog                                               |                                                |
| HUMAN HGNC=14902 UniProtKB=Q9NRW1    | Ras-related protein Rab-6B;RAB6B;ortholog                                               |                                                |
| HUMAN HGNC=143 UniProtKB=P68032      | Actin, alpha cardiac muscle 1;ACTC1;ortholog                                            | actin and actin related protein(PC00039)       |
| HUMAN HGNC=3048 UniProtKB=Q02413     | Desmoglein-1;DSG1;ortholog                                                              | cadherin(PC00057)                              |
| HUMAN HGNC=5732 UniProtKB=P04430     | Immunoglobulin kappa variable 1-16;IGKV1-16;ortholog                                    | immunoglobulin(PC00123)                        |
| HUMAN HGNC=15447 UniProtKB=Q9Y4G6    | Talin-2;TLN2;ortholog                                                                   |                                                |
| HUMAN HGNC=1990 UniProtKB=Q8WWK9     | Cytoskeleton-associated protein 2;CKAP2;ortholog                                        | non-motor microtubule binding protein(PC00166) |
| HUMAN HGNC=24437 UniProtKB=Q96KP4    | Cytosolic non-specific dipeptidase;CNDP2;ortholog                                       | metalloprotease(PC00153)                       |
| HUMAN HGNC=17196 UniProtKB=Q8NG08    | DNA helicase B;HELB;ortholog                                                            | RNA helicase(PC00032)                          |
| HUMAN HGNC=5585 UniProtKB=A0A0C4DH32 | Immunoglobulin heavy variable 3-20;IGHV3-20;ortholog                                    | immunoglobulin(PC00123)                        |
| HUMAN HGNC=4385 UniProtKB=P04899     | Guanine nucleotide-binding protein G(i) subunit alpha-2;GNAI2;ortholog                  | heterotrimeric G-protein(PC00117)              |
| HUMAN HGNC=9559 UniProtKB=Q13200     | 26S proteasome non-ATPase regulatory subunit 2;PSMD2;ortholog                           | protease(PC00190)                              |
| HUMAN HGNC=343 UniProtKB=P23526      | Adenosylhomocysteinase;AHCY;ortholog                                                    | hydrolase(PC00121)                             |
| HUMAN HGNC=10045 UniProtKB=P10153    | Non-secretory ribonuclease;RNASE2;ortholog                                              |                                                |
| HUMAN HGNC=16996 UniProtKB=Q15363    | Transmembrane emp24 domain-containing protein 2;TMED2;ortholog                          | vesicle coat protein(PC00235)                  |
| HUMAN HGNC=5896 UniProtKB=P01715     | Immunoglobulin lambda variable 3-1;IGLV3-1;ortholog                                     | immunoglobulin(PC00123)                        |
| HUMAN HGNC=18144 UniProtKB=Q8IZU8    | Dermatan-sulfate epimerase-like protein;DSEL;ortholog                                   |                                                |
| HUMAN HGNC=9314 UniProtKB=Q08209     | Serine/threonine-protein phosphatase 2B catalytic subunit alpha isoform;PPP3CA;ortholog | protein phosphatase(PC00195)                   |

|                                   |                                                                            |                                                       |
|-----------------------------------|----------------------------------------------------------------------------|-------------------------------------------------------|
| HUMAN HGNC=412 UniProtKB=P49189   | 4-trimethylaminobutyraldehyde dehydrogenase;ALDH9A1;ortholog               | dehydrogenase(PC00092)                                |
| HUMAN HGNC=4208 UniProtKB=P23434  | Glycine cleavage system H protein, mitochondrial;GCSH;ortholog             |                                                       |
| HUMAN HGNC=4798 UniProtKB=Q14520  | Hyaluronan-binding protein 2;HABP2;ortholog                                | serine protease(PC00203)                              |
| HUMAN HGNC=1738 UniProtKB=Q9Y5S2  | Serine/threonine-protein kinase MRCK beta;CDC42BPB;ortholog                | non-receptor serine/threonine protein kinase(PC00167) |
| HUMAN HGNC=11219 UniProtKB=P09486 | SPARC;SPARC;ortholog                                                       | extracellular matrix glycoprotein(PC00100)            |
| HUMAN HGNC=654 UniProtKB=P61204   | ADP-ribosylation factor 3;ARF3;ortholog                                    | G-protein(PC00020)                                    |
| HUMAN HGNC=1717 UniProtKB=Q16181  | Septin-7;SEPTIN7;ortholog                                                  | cytoskeletal protein(PC00085)                         |
| HUMAN HGNC=16268 UniProtKB=Q8IY17 | Patatin-like phospholipase domain-containing protein 6;PNPLA6;ortholog     | esterase(PC00097)                                     |
| HUMAN HGNC=20726 UniProtKB=Q8WVM8 | Sec1 family domain-containing protein 1;SCFD1;ortholog                     | membrane trafficking regulatory protein(PC00151)      |
| HUMAN HGNC=26406 UniProtKB=Q96NL6 | Sodium channel and clathrin linker 1;SCLT1;ortholog                        |                                                       |
| HUMAN HGNC=9801 UniProtKB=P63000  | Ras-related C3 botulinum toxin substrate 1;RAC1;ortholog                   | small GTPase(PC00208)                                 |
| HUMAN HGNC=15750 UniProtKB=P60981 | Destrin;DSTN;ortholog                                                      | non-motor actin binding protein(PC00165)              |
| HUMAN HGNC=11512 UniProtKB=Q9H2B2 | Synaptotagmin-4;SYT4;ortholog                                              | membrane trafficking regulatory protein(PC00151)      |
| HUMAN HGNC=7007 UniProtKB=P61006  | Ras-related protein Rab-8A;RAB8A;ortholog                                  |                                                       |
| HUMAN HGNC=29353 UniProtKB=Q6PI77 | Protein BHLHB9;BHLHB9;ortholog                                             | basic helix-loop-helix transcription factor(PC00055)  |
| HUMAN HGNC=6167 UniProtKB=P19823  | Inter-alpha-trypsin inhibitor heavy chain H2;ITIH2;ortholog                | protease inhibitor(PC00191)                           |
| HUMAN HGNC=626 UniProtKB=P07741   | Adenine phosphoribosyltransferase;APRT;ortholog                            | transferase(PC00220)                                  |
| HUMAN HGNC=1393 UniProtKB=O60840  | Voltage-dependent L-type calcium channel subunit alpha-1F;CACNA1F;ortholog | voltage-gated ion channel(PC00241)                    |
| HUMAN HGNC=9759 UniProtKB=P61026  | Ras-related protein Rab-10;RAB10;ortholog                                  |                                                       |
| HUMAN HGNC=25951 UniProtKB=Q6ULP2 | Aftiphilin;AFTPH;ortholog                                                  |                                                       |
| HUMAN HGNC=1548 UniProtKB=P16152  | Carbonyl reductase [NADPH] 1;CBR1;ortholog                                 | reductase(PC00198)                                    |
| HUMAN HGNC=837 UniProtKB=P30049   | ATP synthase subunit delta, mitochondrial;ATP5F1D;ortholog                 | ATP synthase(PC00002)                                 |
| HUMAN HGNC=7183 UniProtKB=P41218  | Myeloid cell nuclear differentiation antigen;MNDA;ortholog                 | DNA-binding transcription factor(PC00218)             |
| HUMAN HGNC=26427 UniProtKB=Q96ND8 | Zinc finger protein 583;ZNF583;ortholog                                    |                                                       |
| HUMAN HGNC=6091 UniProtKB=P06213  | Insulin receptor;INSR;ortholog                                             | transmembrane signal receptor(PC00197)                |

|                                   |                                                                                                           |                                                  |
|-----------------------------------|-----------------------------------------------------------------------------------------------------------|--------------------------------------------------|
| HUMAN HGNC=22934 UniProtKB=Q8NAB2 | Kelch repeat and BTB domain-containing protein 3;KBTBD3;ortholog                                          | scaffold/adaptor protein(PC00226)                |
| HUMAN HGNC=8997 UniProtKB=P48426  | Phosphatidylinositol 5-phosphate 4-kinase type-2 alpha;PIP4K2A;ortholog                                   | kinase(PC00137)                                  |
| HUMAN HGNC=4838 UniProtKB=P05546  | Heparin cofactor 2;SERPIND1;ortholog                                                                      | protease inhibitor(PC00191)                      |
| HUMAN HGNC=5044 UniProtKB=P61978  | Heterogeneous nuclear ribonucleoprotein K;HNRNPK;ortholog                                                 | RNA metabolism protein(PC00031)                  |
| HUMAN HGNC=7900 UniProtKB=P55786  | Puromycin-sensitive aminopeptidase;NPEPPS;ortholog                                                        | metalloprotease(PC00153)                         |
| HUMAN HGNC=9772 UniProtKB=Q13637  | Ras-related protein Rab-32;RAB32;ortholog                                                                 |                                                  |
| HUMAN HGNC=9531 UniProtKB=P25787  | Proteasome subunit alpha type-2;PSMA2;ortholog                                                            | protease(PC00190)                                |
| HUMAN HGNC=11358 UniProtKB=O75886 | Signal transducing adapter molecule 2;STAM2;ortholog                                                      | scaffold/adaptor protein(PC00226)                |
| HUMAN HGNC=6529 UniProtKB=Q13094  | Lymphocyte cytosolic protein 2;LCP2;ortholog                                                              | scaffold/adaptor protein(PC00226)                |
| HUMAN HGNC=6499 UniProtKB=P11279  | Lysosome-associated membrane glycoprotein 1;LAMP1;ortholog                                                | membrane trafficking regulatory protein(PC00151) |
| HUMAN HGNC=14882 UniProtKB=Q9NQ79 | Cartilage acidic protein 1;CRTAC1;ortholog                                                                |                                                  |
| HUMAN HGNC=1328 UniProtKB=P20851  | C4b-binding protein beta chain;C4BPB;ortholog                                                             |                                                  |
| HUMAN HGNC=24054 UniProtKB=Q8NG31 | Kinetochore scaffold 1;KNL1;ortholog                                                                      |                                                  |
| HUMAN HGNC=2551 UniProtKB=Q13616  | Cullin-1;CUL1;ortholog                                                                                    | ubiquitin-protein ligase(PC00234)                |
| HUMAN HGNC=9556 UniProtKB=O00231  | 26S proteasome non-ATPase regulatory subunit 11;PSMD11;ortholog                                           |                                                  |
| HUMAN HGNC=3300 UniProtKB=P63241  | Eukaryotic translation initiation factor 5A-1;EIF5A;ortholog                                              | translation initiation factor(PC00224)           |
| HUMAN HGNC=11590 UniProtKB=Q16650 | T-box brain protein 1;TBR1;ortholog                                                                       | Rel homology transcription factor(PC00252)       |
| HUMAN HGNC=30646 UniProtKB=Q7KZF4 | Staphylococcal nuclease domain-containing protein 1;SND1;ortholog                                         |                                                  |
| HUMAN HGNC=16273 UniProtKB=Q96A49 | Synapse-associated protein 1;SYAP1;ortholog                                                               |                                                  |
| HUMAN HGNC=6325 UniProtKB=O60282  | Kinesin heavy chain isoform 5C;KIF5C;ortholog                                                             | microtubule binding motor protein(PC00156)       |
| HUMAN HGNC=17780 UniProtKB=Q562R1 | Beta-actin-like protein 2;ACTBL2;ortholog                                                                 | actin and actin related protein(PC00039)         |
| HUMAN HGNC=4749 UniProtKB=Q99877  | Histone H2B type 1-N;H2BC15;ortholog                                                                      | histone(PC00118)                                 |
| HUMAN HGNC=8601 UniProtKB=Q06141  | Regenerating islet-derived protein 3-alpha;REG3A;ortholog                                                 |                                                  |
| HUMAN HGNC=9462 UniProtKB=P60891  | Ribose-phosphate pyrophosphokinase 1;PRPS1;ortholog                                                       | nucleotide kinase(PC00172)                       |
| HUMAN HGNC=17305 UniProtKB=Q9Y6J9 | TAF6-like RNA polymerase II p300/CBP-associated factor-associated factor 65 kDa subunit 6L;TAF6L;ortholog | general transcription factor(PC00259)            |
| HUMAN HGNC=1241 UniProtKB=P02745  | Complement C1q subcomponent subunit A;C1QA;ortholog                                                       |                                                  |

|                                      |                                                                              |                                                       |
|--------------------------------------|------------------------------------------------------------------------------|-------------------------------------------------------|
| HUMAN HGNC=5735 UniProtKB=A0A075B6S5 | Immunoglobulin kappa variable 1-27;IGKV1-27;ortholog                         | immunoglobulin(PC00123)                               |
| HUMAN HGNC=4387 UniProtKB=P08754     | Guanine nucleotide-binding protein G(i) subunit alpha;GNAI3;ortholog         | heterotrimeric G-protein(PC00117)                     |
| HUMAN HGNC=29801 UniProtKB=Q7L9L4    | MOB kinase activator 1B;MOB1B;ortholog                                       | kinase activator(PC00138)                             |
| HUMAN HGNC=37215 UniProtKB=A6NIK2    | Leucine-rich repeat-containing protein 10B;LRRC10B;ortholog                  |                                                       |
| HUMAN HGNC=12628 UniProtKB=P45974    | Ubiquitin carboxyl-terminal hydrolase 5;USP5;ortholog                        | cysteine protease(PC00081)                            |
| HUMAN HGNC=30052 UniProtKB=Q8TEM1    | Nuclear pore membrane glycoprotein 210;NUP210;ortholog                       | transporter(PC00227)                                  |
| HUMAN HGNC=1869 UniProtKB=P11597     | Cholesteryl ester transfer protein;CETP;ortholog                             |                                                       |
| HUMAN HGNC=26801 UniProtKB=Q8N8Q8    | Cytochrome c oxidase assembly protein COX18, mitochondrial;COX18;ortholog    | transporter(PC00227)                                  |
| HUMAN HGNC=12976 UniProtKB=O15231    | Zinc finger protein 185;ZNF185;ortholog                                      |                                                       |
| HUMAN HGNC=1368 UniProtKB=P00915     | Carbonic anhydrase 1;CA1;ortholog                                            |                                                       |
| HUMAN HGNC=6510 UniProtKB=P16949     | Stathmin;STMN1;ortholog                                                      |                                                       |
| HUMAN HGNC=4699 UniProtKB=P46976     | Glycogenin-1;GYG1;ortholog                                                   | glycosyltransferase(PC00111)                          |
| HUMAN HGNC=21101 UniProtKB=O60888    | Protein CutA;CUTA;ortholog                                                   | primary active transporter(PC00068)                   |
| HUMAN HGNC=28883 UniProtKB=Q9H2U2    | Inorganic pyrophosphatase 2, mitochondrial;PPA2;ortholog                     | pyrophosphatase(PC00196)                              |
| HUMAN HGNC=5601 UniProtKB=A0A0C4DH36 | Probable non-functional immunoglobulin heavy variable 3-38;IGHV3-38;ortholog | immunoglobulin(PC00123)                               |
| HUMAN HGNC=9380 UniProtKB=P17612     | cAMP-dependent protein kinase catalytic subunit alpha;PRKACA;ortholog        | non-receptor serine/threonine protein kinase(PC00167) |
| HUMAN HGNC=15912 UniProtKB=Q9UNZ2    | NSFL1 cofactor p47;NSFL1C;ortholog                                           | protein-binding activity modulator(PC00095)           |
| HUMAN HGNC=13200 UniProtKB=Q15942    | Zyxin;ZYX;ortholog                                                           | actin or actin-binding cytoskeletal protein(PC00041)  |
| HUMAN HGNC=25153 UniProtKB=Q96EY5    | Multivesicular body subunit 12A;MVB12A;ortholog                              |                                                       |
| HUMAN HGNC=9935 UniProtKB=Q14257     | Reticulocalbin-2;RCN2;ortholog                                               | calmodulin-related(PC00061)                           |
| HUMAN HGNC=1228 UniProtKB=P05155     | Plasma protease C1 inhibitor;SERPING1;ortholog                               | protease inhibitor(PC00191)                           |
| HUMAN HGNC=17102 UniProtKB=Q92619    | Rho GTPase-activating protein 45;ARHGAP45;ortholog                           |                                                       |
| HUMAN HGNC=12853 UniProtKB=Q04917    | 14-3-3 protein eta;YWHAH;ortholog                                            | scaffold/adaptor protein(PC00226)                     |
| HUMAN HGNC=18673 UniProtKB=Q96JB5    | CDK5 regulatory subunit-associated protein 3;CDK5RAP3;ortholog               |                                                       |
| HUMAN HGNC=6439 UniProtKB=P35908     | Keratin, type II cytoskeletal 2 epidermal;KRT2;ortholog                      |                                                       |
| HUMAN HGNC=12854 UniProtKB=P27348    | 14-3-3 protein theta;YWHAQ;ortholog                                          | scaffold/adaptor protein(PC00226)                     |



|                                        |                                                                                          |                                                      |
|----------------------------------------|------------------------------------------------------------------------------------------|------------------------------------------------------|
| HUMAN HGNC=4444 UniProtKB=P14770       | Platelet glycoprotein IX;GP9;ortholog                                                    |                                                      |
| HUMAN HGNC=1358 UniProtKB=P02748       | Complement component C9;C9;ortholog                                                      |                                                      |
| HUMAN HGNC=4926 UniProtKB=O15212       | Prefoldin subunit 6;PFDN6;ortholog                                                       |                                                      |
| HUMAN HGNC=16 UniProtKB=P01011         | Alpha-1-antichymotrypsin;SERPINA3;ortholog                                               | protease inhibitor(PC00191)                          |
| HUMAN HGNC=5526 UniProtKB=P01859       | Immunoglobulin heavy constant gamma 2;IGHG2;ortholog                                     | immunoglobulin(PC00123)                              |
| HUMAN HGNC=9532 UniProtKB=P25788       | Proteasome subunit alpha type-3;PSMA3;ortholog                                           | protease(PC00190)                                    |
| HUMAN HGNC=12672 UniProtKB=P45880      | Voltage-dependent anion-selective channel protein 2;VDAC2;ortholog                       | voltage-gated ion channel(PC00241)                   |
| HUMAN HGNC=20 UniProtKB=P49588         | Alanine--tRNA ligase, cytoplasmic;AARS1;ortholog                                         | aminoacyl-tRNA synthetase(PC00047)                   |
| HUMAN HGNC=19347 UniProtKB=O14529      | Homeobox protein cut-like 2;CUX2;ortholog                                                | homeodomain transcription factor(PC00119)            |
| HUMAN HGNC=11256 UniProtKB=Q13103      | Secreted phosphoprotein 24;SPP2;ortholog                                                 |                                                      |
| HUMAN HGNC=2444 UniProtKB=P41240       | Tyrosine-protein kinase CSK;CSK;ortholog                                                 |                                                      |
| HUMAN HGNC=18170 UniProtKB=P30085      | UMP-CMP kinase;CMPK1;ortholog                                                            | nucleotide kinase(PC00172)                           |
| HUMAN HGNC=28101 UniProtKB=Q2M2H8      | Probable maltase-glucoamylase 2;MGAM2;ortholog                                           | glucosidase(PC00108)                                 |
| HUMAN HGNC=735 UniProtKB=Q13510        | Acid ceramidase;ASAH1;ortholog                                                           | cysteine protease(PC00081)                           |
| HUMAN HGNC=7547 UniProtKB=P10243       | Myb-related protein A;MYBL1;ortholog                                                     |                                                      |
| HUMAN HGNC=10719 UniProtKB=Q13228      | Methanethiol oxidase;SELENBP1;ortholog                                                   | defense/immunity protein(PC00090)                    |
| HUMAN HGNC=12436 UniProtKB=O43396      | Thioredoxin-like protein 1;TXNL1;ortholog                                                | oxidoreductase(PC00176)                              |
| HUMAN HGNC=7629 UniProtKB=E9PAV3       | Nascent polypeptide-associated complex subunit alpha, muscle-specific form;NACA;ortholog | basic helix-loop-helix transcription factor(PC00055) |
| HUMAN HGNC=10464 UniProtKB=Q15404      | Ras suppressor protein 1;RSU1;ortholog                                                   | scaffold/adaptor protein(PC00226)                    |
| HUMAN Gene=ENH1_HUMAN UniProtKB=Q9N2K0 | HERV-H_2q24.3 provirus ancestral Env polyprotein;-;ortholog                              | viral or transposable element protein(PC00237)       |
| HUMAN HGNC=24087 UniProtKB=Q0VD83      | Apolipoprotein B receptor;APOBR;ortholog                                                 |                                                      |
| HUMAN HGNC=11617 UniProtKB=Q15369      | Elongin-C;ELOC;ortholog                                                                  | general transcription factor(PC00259)                |
| HUMAN HGNC=16867 UniProtKB=O75150      | E3 ubiquitin-protein ligase BRE1B;RNF40;ortholog                                         |                                                      |
| HUMAN HGNC=24808 UniProtKB=O14545      | TRAF-type zinc finger domain-containing protein 1;TRAFD1;ortholog                        |                                                      |
| HUMAN HGNC=14653 UniProtKB=Q9HBI1      | Beta-parvin;PARVB;ortholog                                                               | actin and actin related protein(PC00039)             |
| HUMAN HGNC=3383 UniProtKB=P27105       | Erythrocyte band 7 integral membrane protein;STOM;ortholog                               | cytoskeletal protein(PC00085)                        |

|                                   |                                                                                               |                                          |
|-----------------------------------|-----------------------------------------------------------------------------------------------|------------------------------------------|
| HUMAN HGNC=30025 UniProtKB=Q5VV67 | Peroxisome proliferator-activated receptor gamma coactivator-related protein 1;PPRC1;ortholog | transcription cofactor(PC00217)          |
| HUMAN HGNC=5908 UniProtKB=P01717  | Immunoglobulin lambda variable 3-25;IGLV3-25;ortholog                                         | immunoglobulin(PC00123)                  |
| HUMAN HGNC=17169 UniProtKB=Q13162 | Peroxiredoxin-4;PRDX4;ortholog                                                                | peroxidase(PC00180)                      |
| HUMAN HGNC=12420 UniProtKB=P49411 | Elongation factor Tu, mitochondrial;TUFM;ortholog                                             | translation elongation factor(PC00222)   |
| HUMAN HGNC=21696 UniProtKB=Q9Y3Q8 | TSC22 domain family protein 4;TSC22D4;ortholog                                                |                                          |
| HUMAN HGNC=11891 UniProtKB=P05452 | Tetranectin;CLEC3B;ortholog                                                                   | intercellular signal molecule(PC00207)   |
| HUMAN HGNC=11453 UniProtKB=P50225 | Sulfotransferase 1A1;SULT1A1;ortholog                                                         | transferase(PC00220)                     |
| HUMAN HGNC=10519 UniProtKB=Q9NZJ4 | Sacsin;SACS;ortholog                                                                          |                                          |
| HUMAN HGNC=20710 UniProtKB=Q9BTP6 | Zinc finger BED domain-containing protein 2;ZBED2;ortholog                                    |                                          |
| HUMAN HGNC=26486 UniProtKB=Q6PJW8 | Consortin;CNST;ortholog                                                                       |                                          |
| HUMAN HGNC=29141 UniProtKB=O94967 | WD repeat-containing protein 47;WDR47;ortholog                                                |                                          |
| HUMAN HGNC=3282 UniProtKB=P60842  | Eukaryotic initiation factor 4A-I;EIF4A1;ortholog                                             |                                          |
| HUMAN HGNC=5576 UniProtKB=P01817  | Immunoglobulin heavy variable 2-5;IGHV2-5;ortholog                                            | immunoglobulin(PC00123)                  |
| HUMAN HGNC=12733 UniProtKB=Q9Y6W5 | Wiskott-Aldrich syndrome protein family member 2;WASF2;ortholog                               | non-motor actin binding protein(PC00165) |
| HUMAN HGNC=10774 UniProtKB=P23246 | Splicing factor, proline- and glutamine-rich;SFPQ;ortholog                                    | RNA metabolism protein(PC00031)          |
| HUMAN HGNC=3756 UniProtKB=Q14315  | Filamin-C;FLNC;ortholog                                                                       |                                          |
| HUMAN HGNC=18271 UniProtKB=Q8N8S7 | Protein enabled homolog;ENAH;ortholog                                                         | scaffold/adaptor protein(PC00226)        |
| HUMAN HGNC=11655 UniProtKB=P17987 | T-complex protein 1 subunit alpha;TCP1;ortholog                                               | chaperonin(PC00073)                      |
| HUMAN HGNC=27023 UniProtKB=A6NMZ7 | Collagen alpha-6(VI) chain;COL6A6;ortholog                                                    |                                          |
| HUMAN HGNC=5610 UniProtKB=P01767  | Immunoglobulin heavy variable 3-53;IGHV3-53;ortholog                                          | immunoglobulin(PC00123)                  |
| HUMAN HGNC=5882 UniProtKB=P01701  | Immunoglobulin lambda variable 1-51;IGLV1-51;ortholog                                         | immunoglobulin(PC00123)                  |
| HUMAN HGNC=667 UniProtKB=P61586   | Transforming protein RhoA;RHOA;ortholog                                                       | small GTPase(PC00208)                    |
| HUMAN HGNC=27257 UniProtKB=Q3MIP1 | Inositol 1,4,5-trisphosphate receptor-interacting protein-like 2;ITPRIL2;ortholog             |                                          |
| HUMAN HGNC=3718 UniProtKB=P26885  | Peptidyl-prolyl cis-trans isomerase FKBP2;FKBP2;ortholog                                      |                                          |
| HUMAN HGNC=1692 UniProtKB=P08962  | CD63 antigen;CD63;ortholog                                                                    |                                          |
| HUMAN HGNC=746 UniProtKB=P04424   | Argininosuccinate lyase;ASL;ortholog                                                          | lyase(PC00144)                           |
| HUMAN HGNC=2254 UniProtKB=Q9ULV4  | Coronin-1C;CORO1C;ortholog                                                                    | non-motor actin binding protein(PC00165) |

|                                                    |                                                                                         |                                            |
|----------------------------------------------------|-----------------------------------------------------------------------------------------|--------------------------------------------|
| HUMAN HGNC=13312 UniProtKB=P78417                  | Glutathione S-transferase omega-1;GSTO1;ortholog                                        |                                            |
| HUMAN HGNC=9700 UniProtKB=Q8IVU1                   | Immunoglobulin superfamily DCC subclass member 3;IGDCC3;ortholog                        |                                            |
| HUMAN HGNC=13529 UniProtKB=Q9Y2B0                  | Protein canopy homolog 2;CNPY2;ortholog                                                 |                                            |
| HUMAN HGNC=5261 UniProtKB=P10809                   | 60 kDa heat shock protein, mitochondrial;HSPD1;ortholog                                 |                                            |
| HUMAN HGNC=2761 UniProtKB=P59665                   | Neutrophil defensin 1;DEFA1;ortholog                                                    | antimicrobial response protein(PC00051)    |
| HUMAN HGNC=24607 UniProtKB=Q86VF2                  | Immunoglobulin-like and fibronectin type III domain-containing protein 1;IGFN1;ortholog |                                            |
| HUMAN HGNC=5739 UniProtKB=A0A075B6S9               | Probable non-functional immunoglobulin kappa variable 1-37;IGKV1-37;ortholog            | immunoglobulin(PC00123)                    |
| HUMAN HGNC=30306 UniProtKB=Q99623                  | Prohibitin-2;PHB2;ortholog                                                              |                                            |
| HUMAN Ensembl=ENSGO0000282150 UniProtKB=A0A0J9YY99 | Ig-like domain-containing protein;ENSG00000282150;ortholog                              | immunoglobulin(PC00123)                    |
| HUMAN HGNC=4621 UniProtKB=P15170                   | Eukaryotic peptide chain release factor GTP-binding subunit ERF3A;GSPT1;ortholog        | translation factor(PC00223)                |
| HUMAN HGNC=9504 UniProtKB=O43739                   | Cytohesin-3;CYTH3;ortholog                                                              | guanyl-nucleotide exchange factor(PC00113) |
| HUMAN HGNC=11007 UniProtKB=P11169                  | Solute carrier family 2, facilitated glucose transporter member 3;SLC2A3;ortholog       |                                            |
| HUMAN HGNC=5541 UniProtKB=P01871                   | Immunoglobulin heavy constant mu;IGHM;ortholog                                          | immunoglobulin(PC00123)                    |
| HUMAN HGNC=2520 UniProtKB=Q9NRF8                   | CTP synthase 2;CTPS2;ortholog                                                           | ligase(PC00142)                            |
| HUMAN HGNC=17497 UniProtKB=Q8WZA0                  | Protein LZIC;LZIC;ortholog                                                              |                                            |
| HUMAN HGNC=568 UniProtKB=O14617                    | AP-3 complex subunit delta-1;AP3D1;ortholog                                             | transporter(PC00227)                       |
| HUMAN HGNC=806 UniProtKB=P54709                    | Sodium/potassium-transporting ATPase subunit beta-3;ATP1B3;ortholog                     | primary active transporter(PC00068)        |
| HUMAN HGNC=11984 UniProtKB=Q6ZVM7                  | TOM1-like protein 2;TOM1L2;ortholog                                                     |                                            |
| HUMAN HGNC=8010 UniProtKB=Q9Y4C0                   | Neurexin-3;NRXN3;ortholog                                                               |                                            |
| HUMAN HGNC=6387 UniProtKB=Q07866                   | Kinesin light chain 1;KLC1;ortholog                                                     | microtubule binding motor protein(PC00156) |
| HUMAN HGNC=188 UniProtKB=O14672                    | Disintegrin and metalloproteinase domain-containing protein 10;ADAM10;ortholog          | protease(PC00190)                          |
| HUMAN HGNC=12755 UniProtKB=Q9UNX4                  | WD repeat-containing protein 3;WDR3;ortholog                                            |                                            |
| HUMAN HGNC=31418 UniProtKB=Q5VYM1                  | Uncharacterized protein C9orf131;C9orf131;ortholog                                      |                                            |
| HUMAN HGNC=16906 UniProtKB=Q9Y2Q3                  | Glutathione S-transferase kappa 1;GSTK1;ortholog                                        | transferase(PC00220)                       |
| HUMAN HGNC=26350 UniProtKB=Q7Z5J8                  | Ankyrin and armadillo repeat-containing protein;ANKAR;ortholog                          |                                            |
| HUMAN HGNC=19985 UniProtKB=P53999                  | Activated RNA polymerase II transcriptional coactivator p15;SUB1;ortholog               | general transcription factor(PC00259)      |

|                                      |                                                             |                                                      |
|--------------------------------------|-------------------------------------------------------------|------------------------------------------------------|
| HUMAN HGNC=24335 UniProtKB=Q99627    | COP9 signalosome complex subunit 8;COPS8;ortholog           | scaffold/adaptor protein(PC00226)                    |
| HUMAN HGNC=15999 UniProtKB=Q9NZV5    | Selenoprotein N;SELENON;ortholog                            |                                                      |
| HUMAN HGNC=5816 UniProtKB=P01624     | Immunoglobulin kappa variable 3-15;IGKV3-15;ortholog        | immunoglobulin(PC00123)                              |
| HUMAN HGNC=11985 UniProtKB=O94826    | Mitochondrial import receptor subunit TOM70;TOMM70;ortholog | primary active transporter(PC00068)                  |
| HUMAN HGNC=5733 UniProtKB=P01599     | Immunoglobulin kappa variable 1-17;IGKV1-17;ortholog        | immunoglobulin(PC00123)                              |
| HUMAN HGNC=6207 UniProtKB=P14923     | Junction plakoglobin;JUP;ortholog                           |                                                      |
| HUMAN HGNC=11763 UniProtKB=P02786    | Transferrin receptor protein 1;TFRC;ortholog                | metalloprotease(PC00153)                             |
| HUMAN HGNC=1165 UniProtKB=Q9Y4D2     | Diacylglycerol lipase-alpha;DAGLA;ortholog                  | lipase(PC00143)                                      |
| HUMAN HGNC=18263 UniProtKB=Q9UL25    | Ras-related protein Rab-21;RAB21;ortholog                   |                                                      |
| HUMAN HGNC=11873 UniProtKB=Q9NYL9    | Tropomodulin-3;TMOD3;ortholog                               | actin or actin-binding cytoskeletal protein(PC00041) |
| HUMAN HGNC=7849 UniProtKB=P15531     | Nucleoside diphosphate kinase A;NME1;ortholog               | kinase(PC00137)                                      |
| HUMAN HGNC=11445 UniProtKB=Q15833    | Syntaxin-binding protein 2;STXBP2;ortholog                  | membrane trafficking regulatory protein(PC00151)     |
| HUMAN HGNC=21245 UniProtKB=Q6UXB8    | Peptidase inhibitor 16;PI16;ortholog                        | defense/immunity protein(PC00090)                    |
| HUMAN HGNC=1735 UniProtKB=Q16543     | Hsp90 co-chaperone Cdc37;CDC37;ortholog                     | chaperone(PC00072)                                   |
| HUMAN HGNC=26281 UniProtKB=Q6ZN84    | Coiled-coil domain-containing protein 81;CCDC81;ortholog    |                                                      |
| HUMAN HGNC=19880 UniProtKB=Q9Y6C2    | EMILIN-1;EMILIN1;ortholog                                   |                                                      |
| HUMAN HGNC=4719 UniProtKB=P16401     | Histone H1.5;H1-5;ortholog                                  | histone(PC00118)                                     |
| HUMAN HGNC=5783 UniProtKB=A0A075B6P5 | Immunoglobulin kappa variable 2-28;IGKV2-28;ortholog        | immunoglobulin(PC00123)                              |
| HUMAN HGNC=4138 UniProtKB=Q14697     | Neutral alpha-glucosidase AB;GANAB;ortholog                 | glucosidase(PC00108)                                 |
| HUMAN HGNC=34383 UniProtKB=A6NGG8    | Photoreceptor cilium actin regulator;PCARE;ortholog         |                                                      |
| HUMAN HGNC=1095 UniProtKB=P17213     | Bactericidal permeability-increasing protein;BPI;ortholog   |                                                      |
| HUMAN HGNC=9352 UniProtKB=Q06830     | Peroxiredoxin-1;PRDX1;ortholog                              | peroxidase(PC00180)                                  |
| HUMAN HGNC=10474 UniProtKB=Q9Y265    | RuvB-like 1;RUVBL1;ortholog                                 |                                                      |
| HUMAN HGNC=2231 UniProtKB=P53618     | Coatomer subunit beta;COPB1;ortholog                        | vesicle coat protein(PC00235)                        |
| HUMAN HGNC=9583 UniProtKB=P26599     | Polypyrimidine tract-binding protein 1;PTBP1;ortholog       |                                                      |
| HUMAN HGNC=6421 UniProtKB=P19012     | Keratin, type I cytoskeletal 15;KRT15;ortholog              |                                                      |

|                                      |                                                                    |                                                      |
|--------------------------------------|--------------------------------------------------------------------|------------------------------------------------------|
| HUMAN HGNC=347 UniProtKB=Q09666      | Neuroblast differentiation-associated protein AHNAK;AHNAK;ortholog |                                                      |
| HUMAN HGNC=15754 UniProtKB=P24844    | Myosin regulatory light polypeptide 9;MYL9;ortholog                | actin or actin-binding cytoskeletal protein(PC00041) |
| HUMAN HGNC=6984 UniProtKB=P23368     | NAD-dependent malic enzyme, mitochondrial;ME2;ortholog             | oxidoreductase(PC00176)                              |
| HUMAN HGNC=2328 UniProtKB=P50416     | Carnitine O-palmitoyltransferase 1, liver isoform;CPT1A;ortholog   | acyltransferase(PC00042)                             |
| HUMAN HGNC=10661 UniProtKB=P31431    | Syndecan-4;SDC4;ortholog                                           | transmembrane signal receptor(PC00197)               |
| HUMAN HGNC=23708 UniProtKB=Q6ZR52    | Zinc finger protein 493;ZNF493;ortholog                            | C2H2 zinc finger transcription factor(PC00248)       |
| HUMAN HGNC=5480 UniProtKB=P01880     | Immunoglobulin heavy constant delta;IGHD;ortholog                  | immunoglobulin(PC00123)                              |
| HUMAN HGNC=1488 UniProtKB=P52907     | F-actin-capping protein subunit alpha-1;CAPZA1;ortholog            | non-motor actin binding protein(PC00165)             |
| HUMAN HGNC=1709 UniProtKB=P21926     | CD9 antigen;CD9;ortholog                                           |                                                      |
| HUMAN HGNC=24748 UniProtKB=Q68D51    | DENN domain-containing protein 2C;DENND2C;ortholog                 |                                                      |
| HUMAN HGNC=4716 UniProtKB=P16403     | Histone H1.2;H1-2;ortholog                                         | histone(PC00118)                                     |
| HUMAN HGNC=10377 UniProtKB=P05387    | 60S acidic ribosomal protein P2;RPLP2;ortholog                     | ribosomal protein(PC00202)                           |
| HUMAN HGNC=9255 UniProtKB=P23284     | Peptidyl-prolyl cis-trans isomerase B;PPIB;ortholog                | chaperone(PC00072)                                   |
| HUMAN HGNC=6735 UniProtKB=P07948     | Tyrosine-protein kinase Lyn;LYN;ortholog                           |                                                      |
| HUMAN HGNC=5836 UniProtKB=A0A0C4DH24 | Immunoglobulin kappa variable 6-21;IGKV6-21;ortholog               | immunoglobulin(PC00123)                              |
| HUMAN HGNC=23432 UniProtKB=Q9NXG0    | Centlein;CNTLN;ortholog                                            |                                                      |
| HUMAN HGNC=3211 UniProtKB=P29692     | Elongation factor 1-delta;EEF1D;ortholog                           | translation elongation factor(PC00222)               |
| HUMAN HGNC=4376 UniProtKB=P36959     | GMP reductase 1;GMPR;ortholog                                      | reductase(PC00198)                                   |
| HUMAN HGNC=8948 UniProtKB=P29622     | Kallistatin;SERPINA4;ortholog                                      | protease inhibitor(PC00191)                          |
| HUMAN HGNC=1682 UniProtKB=Q08722     | Leukocyte surface antigen CD47;CD47;ortholog                       | cell adhesion molecule(PC00069)                      |
| HUMAN HGNC=2528 UniProtKB=P53634     | Dipeptidyl peptidase 1;CTSC;ortholog                               | cysteine protease(PC00081)                           |
| HUMAN HGNC=8062 UniProtKB=P49790     | Nuclear pore complex protein Nup153;NUP153;ortholog                | transporter(PC00227)                                 |
| HUMAN HGNC=3380 UniProtKB=Q9Y2J2     | Band 4.1-like protein 3;EPB41L3;ortholog                           |                                                      |
| HUMAN HGNC=23151 UniProtKB=Q86UX7    | Fermitin family homolog 3;FERMT3;ortholog                          |                                                      |
| HUMAN HGNC=14977 UniProtKB=Q9Y5W7    | Sorting nexin-14;SNX14;ortholog                                    | scaffold/adaptor protein(PC00226)                    |
| HUMAN HGNC=9673 UniProtKB=Q12913     | Receptor-type tyrosine-protein phosphatase eta;PTPRJ;ortholog      | protein phosphatase(PC00195)                         |

|                                       |                                                                                                      |                                                             |
|---------------------------------------|------------------------------------------------------------------------------------------------------|-------------------------------------------------------------|
| HUMAN HGNC=11510 U<br>niProtKB=Q8N9I0 | Synaptotagmin-2;SYT2;ortholog                                                                        | membrane trafficking<br>regulatory<br>protein(PC00151)      |
| HUMAN HGNC=25544 U<br>niProtKB=Q9HCI7 | E3 ubiquitin-protein ligase MSL2;MSL2;ortholog                                                       |                                                             |
| HUMAN HGNC=19825 U<br>niProtKB=Q6SA08 | Testis-specific serine/threonine-protein kinase<br>4;TSSK4;ortholog                                  | non-receptor<br>serine/threonine protein<br>kinase(PC00167) |
| HUMAN HGNC=20369 U<br>niProtKB=Q9H4X1 | Regulator of cell cycle RGCC;RGCC;ortholog                                                           |                                                             |
| HUMAN HGNC=18585 U<br>niProtKB=Q96DH6 | RNA-binding protein Musashi homolog<br>2;MSI2;ortholog                                               |                                                             |
| HUMAN HGNC=9778 Un<br>iProtKB=P20337  | Ras-related protein Rab-3B;RAB3B;ortholog                                                            |                                                             |
| HUMAN HGNC=2267 Un<br>iProtKB=P20674  | Cytochrome c oxidase subunit 5A,<br>mitochondrial;COX5A;ortholog                                     | oxidase(PC00175)                                            |
| HUMAN HGNC=1472 Un<br>iProtKB=P49913  | Cathelicidin antimicrobial peptide;CAMP;ortholog                                                     | antimicrobial response<br>protein(PC00051)                  |
| HUMAN HGNC=3148 Un<br>iProtKB=P19971  | Thymidine phosphorylase;TYMP;ortholog                                                                | glycosyltransferase(PC001<br>11)                            |
| HUMAN HGNC=29058 U<br>niProtKB=O60268 | Uncharacterized protein KIAA0513;KIAA0513;ortholog                                                   |                                                             |
| HUMAN HGNC=7219 Un<br>iProtKB=Q00013  | 55 kDa erythrocyte membrane<br>protein;MPP1;ortholog                                                 | scaffold/adaptor<br>protein(PC00226)                        |
| HUMAN HGNC=17259 U<br>niProtKB=Q9Y4Z0 | U6 snRNA-associated Sm-like protein<br>LSm4;LSM4;ortholog                                            | RNA splicing<br>factor(PC00148)                             |
| HUMAN HGNC=19986 U<br>niProtKB=P99999 | Cytochrome c;CYCS;ortholog                                                                           |                                                             |
| HUMAN HGNC=29416 U<br>niProtKB=Q5T7W0 | Zinc finger protein 618;ZNF618;ortholog                                                              | C2H2 zinc finger<br>transcription<br>factor(PC00248)        |
| HUMAN HGNC=24356 U<br>niProtKB=Q9P126 | C-type lectin domain family 1 member<br>B;CLEC1B;ortholog                                            |                                                             |
| HUMAN HGNC=20347 U<br>niProtKB=Q9H9C1 | Spermatogenesis-defective protein 39<br>homolog;VIPAS39;ortholog                                     |                                                             |
| HUMAN HGNC=13487 U<br>niProtKB=Q96QK1 | Vacuolar protein sorting-associated protein<br>35;VPS35;ortholog                                     | membrane traffic<br>protein(PC00150)                        |
| HUMAN HGNC=25571 U<br>niProtKB=Q9NVG8 | TBC1 domain family member 13;TBC1D13;ortholog                                                        | GTPase-activating<br>protein(PC00257)                       |
| HUMAN HGNC=17801 U<br>niProtKB=Q8NHY6 | Zinc finger protein 28 homolog;ZFP28;ortholog                                                        |                                                             |
| HUMAN HGNC=30377 U<br>niProtKB=Q14160 | Protein scribble homolog;SCRIB;ortholog                                                              | scaffold/adaptor<br>protein(PC00226)                        |
| HUMAN HGNC=4396 Un<br>iProtKB=P62873  | Guanine nucleotide-binding protein G(I)/G(S)/G(T)<br>subunit beta-1;GNB1;ortholog                    | heterotrimeric G-<br>protein(PC00117)                       |
| HUMAN HGNC=29190 U<br>niProtKB=Q9UPQ9 | Trinucleotide repeat-containing gene 6B<br>protein;TNRC6B;ortholog                                   | RNA metabolism<br>protein(PC00031)                          |
| HUMAN HGNC=11320 U<br>niProtKB=Q8IZP0 | Abl interactor 1;ABI1;ortholog                                                                       | scaffold/adaptor<br>protein(PC00226)                        |
| HUMAN HGNC=16500 U<br>niProtKB=Q9UN19 | Dual adapter for phosphotyrosine and 3-<br>phosphotyrosine and 3-<br>phosphoinositide;DAPP1;ortholog |                                                             |
| HUMAN HGNC=1452 Un<br>iProtKB=P27482  | Calmodulin-like protein 3;CALML3;ortholog                                                            | calmodulin-<br>related(PC00061)                             |

|                                         |                                                                                 |                                                              |
|-----------------------------------------|---------------------------------------------------------------------------------|--------------------------------------------------------------|
| HUMAN HGNC=8881 UniProtKB=P07737        | Profilin-1;PFN1;ortholog                                                        | non-motor actin binding protein(PC00165)                     |
| HUMAN HGNC=9391 UniProtKB=P13861        | cAMP-dependent protein kinase type II-alpha regulatory subunit;PRKAR2A;ortholog | kinase modulator(PC00140)                                    |
| HUMAN HGNC=9361 UniProtKB=P10124        | Serglycin;SRGN;ortholog                                                         |                                                              |
| HUMAN HGNC=12458 UniProtKB=P62987       | Ubiquitin-60S ribosomal protein L40;UBA52;ortholog                              |                                                              |
| HUMAN HGNC=15749 UniProtKB=Q9NP55       | BPI fold-containing family A member 1;BPIFA1;ortholog                           |                                                              |
| HUMAN HGNC=17905 UniProtKB=Q9Y613       | FH1/FH2 domain-containing protein 1;FHOD1;ortholog                              |                                                              |
| HUMAN HGNC=14085 UniProtKB=Q9NQC3       | Reticulon-4;RTN4;ortholog                                                       |                                                              |
| HUMAN HGNC=12647 UniProtKB=Q9BV40       | Vesicle-associated membrane protein 8;VAMP8;ortholog                            |                                                              |
| HUMAN HGNC=5386 UniProtKB=P51553        | Isocitrate dehydrogenase [NAD] subunit gamma, mitochondrial;IDH3G;ortholog      | dehydrogenase(PC00092)                                       |
| HUMAN HGNC=31332 UniProtKB=Q6IQ22       | Ras-related protein Rab-12;RAB12;ortholog                                       |                                                              |
| HUMAN HGNC=33895 UniProtKB=Q6S8J3       | POTE ankyrin domain family member E;POTEE;ortholog                              | membrane traffic protein(PC00150)                            |
| HUMAN HGNC=9093 UniProtKB=P55058        | Phospholipid transfer protein;PLTP;ortholog                                     |                                                              |
| HUMAN HGNC=10475 UniProtKB=Q9Y230       | RuvB-like 2;RUVBL2;ortholog                                                     |                                                              |
| HUMAN HGNC=23378 UniProtKB=Q5HYC2       | Uncharacterized protein KIAA2026;KIAA2026;ortholog                              |                                                              |
| HUMAN HGNC=9868 UniProtKB=Q99969        | Retinoic acid receptor responder protein 2;RARRES2;ortholog                     |                                                              |
| HUMAN HGNC=5586 UniProtKB=A0A0B4J1V1    | Immunoglobulin heavy variable 3-21;IGHV3-21;ortholog                            | immunoglobulin(PC00123)                                      |
| HUMAN Gene=HV309_HUMAN UniProtKB=P01782 | Immunoglobulin heavy variable 3-9;IGHV3-9;ortholog                              | immunoglobulin(PC00123)                                      |
| HUMAN HGNC=3579 UniProtKB=P16930        | Fumarylacetoacetase;FAH;ortholog                                                |                                                              |
| HUMAN HGNC=6970 UniProtKB=P40925        | Malate dehydrogenase, cytoplasmic;MDH1;ortholog                                 | dehydrogenase(PC00092)                                       |
| HUMAN HGNC=23664 UniProtKB=Q5TCZ1       | SH3 and PX domain-containing protein 2A;SH3PXD2A;ortholog                       |                                                              |
| HUMAN HGNC=2153 UniProtKB=Q9NQW8        | Cyclic nucleotide-gated cation channel beta-3;CNGB3;ortholog                    | ligand-gated ion channel(PC00141)                            |
| HUMAN HGNC=11619 UniProtKB=Q15370       | Elongin-B;ELOB;ortholog                                                         | general transcription factor(PC00259)                        |
| HUMAN HGNC=1859 UniProtKB=Q9BV73        | Centrosome-associated protein CEP250;CEP250;ortholog                            | chromatin/chromatin-binding, or -regulatory protein(PC00077) |
| HUMAN HGNC=9472 UniProtKB=Q99538        | Legumain;LGMN;ortholog                                                          | cysteine protease(PC00081)                                   |
| HUMAN HGNC=618 UniProtKB=O14791         | Apolipoprotein L1;APOL1;ortholog                                                | apolipoprotein(PC00052)                                      |
| HUMAN HGNC=395 UniProtKB=P13716         | Delta-aminolevulinic acid dehydratase;ALAD;ortholog                             | dehydratase(PC00091)                                         |

|                                   |                                                                                             |                                                    |
|-----------------------------------|---------------------------------------------------------------------------------------------|----------------------------------------------------|
| HUMAN HGNC=30026 UniProtKB=Q8TD55 | Pleckstrin homology domain-containing family O member 2;PLEKHO2;ortholog                    |                                                    |
| HUMAN HGNC=11559 UniProtKB=P37837 | Transaldolase;TALDO1;ortholog                                                               | aldolase(PC00044)                                  |
| HUMAN HGNC=24729 UniProtKB=Q96LP6 | Uncharacterized protein C12orf42;C12orf42;ortholog                                          |                                                    |
| HUMAN HGNC=21393 UniProtKB=Q9Y3V2 | RWD domain-containing protein 3;RWDD3;ortholog                                              |                                                    |
| HUMAN HGNC=22931 UniProtKB=Q9P2N7 | Kelch-like protein 13;KLHL13;ortholog                                                       |                                                    |
| HUMAN HGNC=830 UniProtKB=P06576   | ATP synthase subunit beta, mitochondrial;ATP5F1B;ortholog                                   | ATP synthase(PC00002)                              |
| HUMAN HGNC=29021 UniProtKB=O15078 | Centrosomal protein of 290 kDa;CEP290;ortholog                                              |                                                    |
| HUMAN HGNC=15713 UniProtKB=Q9UJX4 | Anaphase-promoting complex subunit 5;ANAPC5;ortholog                                        |                                                    |
| HUMAN HGNC=3157 UniProtKB=Q92838  | Ectodysplasin-A;EDA;ortholog                                                                |                                                    |
| HUMAN HGNC=2389 UniProtKB=P02511  | Alpha-crystallin B chain;CRYAB;ortholog                                                     |                                                    |
| HUMAN HGNC=10833 UniProtKB=Q9Y371 | Endophilin-B1;SH3GLB1;ortholog                                                              |                                                    |
| HUMAN HGNC=11583 UniProtKB=P05543 | Thyroxine-binding globulin;SERPINA7;ortholog                                                | protease inhibitor(PC00191)                        |
| HUMAN HGNC=30796 UniProtKB=Q9Y3F4 | Serine-threonine kinase receptor-associated protein;STRAP;ortholog                          | translation initiation factor(PC00224)             |
| HUMAN HGNC=23077 UniProtKB=Q96FW1 | Ubiquitin thioesterase OTUB1;OTUB1;ortholog                                                 | cysteine protease(PC00081)                         |
| HUMAN HGNC=29035 UniProtKB=O43314 | Inositol hexakisphosphate and diphosphoinositol-pentakisphosphate kinase 2;PPIP5K2;ortholog | nucleotide kinase(PC00172)                         |
| HUMAN HGNC=1331 UniProtKB=P01031  | Complement C5;C5;ortholog                                                                   | protease inhibitor(PC00191)                        |
| HUMAN HGNC=25361 UniProtKB=Q8N264 | Rho GTPase-activating protein 24;ARHGAP24;ortholog                                          |                                                    |
| HUMAN HGNC=12652 UniProtKB=P50552 | Vasodilator-stimulated phosphoprotein;VASP;ortholog                                         | scaffold/adaptor protein(PC00226)                  |
| HUMAN HGNC=1324 UniProtKB=P0C0L5  | Complement C4-B;C4B_2;ortholog                                                              | protease inhibitor(PC00191)                        |
| HUMAN HGNC=6153 UniProtKB=P05556  | Integrin beta-1;ITGB1;ortholog                                                              | integrin(PC00126)                                  |
| HUMAN HGNC=8868 UniProtKB=Q9NQP4  | Prefoldin subunit 4;PFDN4;ortholog                                                          |                                                    |
| HUMAN HGNC=8988 UniProtKB=Q13526  | Peptidyl-prolyl cis-trans isomerase NIMA-interacting 1;PIN1;ortholog                        | chaperone(PC00072)                                 |
| HUMAN HGNC=18808 UniProtKB=Q9Y6E2 | Basic leucine zipper and W2 domain-containing protein 2;BZW2;ortholog                       | basic leucine zipper transcription factor(PC00056) |
| HUMAN HGNC=1681 UniProtKB=P16070  | CD44 antigen;CD44;ortholog                                                                  | transmembrane signal receptor(PC00197)             |
| HUMAN HGNC=19368 UniProtKB=Q4G0P3 | Hydrocephalus-inducing protein homolog;HYDIN;ortholog                                       |                                                    |
| HUMAN HGNC=20373 UniProtKB=Q9NZD8 | Maspardin;SPG21;ortholog                                                                    |                                                    |



|                                      |                                                                         |                                                              |
|--------------------------------------|-------------------------------------------------------------------------|--------------------------------------------------------------|
| HUMAN HGNC=7373 UniProtKB=P26038     | Moesin;MSN;ortholog                                                     | actin or actin-binding cytoskeletal protein(PC00041)         |
| HUMAN HGNC=8728 UniProtKB=P22061     | Protein-L-isoaspartate(D-aspartate) O-methyltransferase;PCMT1;ortholog  | methyltransferase(PC00155)                                   |
| HUMAN HGNC=3530 UniProtKB=P00748     | Coagulation factor XII;F12;ortholog                                     | serine protease(PC00203)                                     |
| HUMAN HGNC=5662 UniProtKB=A0A0B4J1U7 | Immunoglobulin heavy variable 6-1;IGHV6-1;ortholog                      | immunoglobulin(PC00123)                                      |
| HUMAN HGNC=1226 UniProtKB=O14908     | PDZ domain-containing protein GIPC1;GIPC1;ortholog                      | scaffold/adaptor protein(PC00226)                            |
| HUMAN HGNC=14008 UniProtKB=Q9BW11    | Max dimerization protein 3;MXD3;ortholog                                | basic helix-loop-helix transcription factor(PC00055)         |
| HUMAN HGNC=7640 UniProtKB=Q99733     | Nucleosome assembly protein 1-like 4;NAP1L4;ortholog                    | chromatin/chromatin-binding, or -regulatory protein(PC00077) |
| HUMAN HGNC=20040 UniProtKB=Q01518    | Adenylyl cyclase-associated protein 1;CAP1;ortholog                     | actin or actin-binding cytoskeletal protein(PC00041)         |
| HUMAN HGNC=20296 UniProtKB=Q9Y2H6    | Fibronectin type-III domain-containing protein 3A;FNDC3A;ortholog       | ubiquitin-protein ligase(PC00234)                            |
| HUMAN HGNC=8888 UniProtKB=P18669     | Phosphoglycerate mutase 1;PGAM1;ortholog                                | mutase(PC00160)                                              |
| HUMAN HGNC=6714 UniProtKB=Q14766     | Latent-transforming growth factor beta-binding protein 1;LTBP1;ortholog | extracellular matrix structural protein(PC00103)             |
| HUMAN HGNC=3594 UniProtKB=P49327     | Fatty acid synthase;FASN;ortholog                                       |                                                              |
| HUMAN HGNC=1620 UniProtKB=P40227     | T-complex protein 1 subunit zeta;CCT6A;ortholog                         | chaperonin(PC00073)                                          |
| HUMAN HGNC=23643 UniProtKB=Q8IVF6    | Ankyrin repeat domain-containing protein 18A;ANKRD18A;ortholog          |                                                              |
| HUMAN HGNC=11554 UniProtKB=P37802    | Transgelin-2;TAGLN2;ortholog                                            | non-motor actin binding protein(PC00165)                     |
| HUMAN HGNC=3153 UniProtKB=Q16610     | Extracellular matrix protein 1;ECM1;ortholog                            |                                                              |
| HUMAN HGNC=10396 UniProtKB=P62249    | 40S ribosomal protein S16;RPS16;ortholog                                | ribosomal protein(PC00202)                                   |
| HUMAN HGNC=11766 UniProtKB=P01137    | Transforming growth factor beta-1 proprotein;TGFB1;ortholog             | growth factor(PC00112)                                       |
| HUMAN HGNC=5652 UniProtKB=A0A075B6R2 | Immunoglobulin heavy variable 4-4;IGHV4-4;ortholog                      | immunoglobulin(PC00123)                                      |
| HUMAN HGNC=5269 UniProtKB=P61604     | 10 kDa heat shock protein, mitochondrial;HSPE1;ortholog                 | chaperonin(PC00073)                                          |
| HUMAN HGNC=10353 UniProtKB=P36578    | 60S ribosomal protein L4;RPL4;ortholog                                  | ribosomal protein(PC00202)                                   |
| HUMAN HGNC=33108 UniProtKB=Q6NX45    | Zinc finger protein 774;ZNF774;ortholog                                 |                                                              |
| HUMAN HGNC=29327 UniProtKB=Q5VZ46    | Uncharacterized protein KIAA1614;KIAA1614;ortholog                      | tight junction(PC00214)                                      |
| HUMAN HGNC=9406 UniProtKB=Q16513     | Serine/threonine-protein kinase N2;PKN2;ortholog                        | non-receptor serine/threonine protein kinase(PC00167)        |

|                                   |                                                                        |                                                       |
|-----------------------------------|------------------------------------------------------------------------|-------------------------------------------------------|
| HUMAN HGNC=2292 UniProtKB=P15954  | Cytochrome c oxidase subunit 7C, mitochondrial;COX7C;ortholog          | oxidase(PC00175)                                      |
| HUMAN HGNC=31073 UniProtKB=Q9Y2K3 | Myosin-15;MYH15;ortholog                                               |                                                       |
| HUMAN HGNC=20508 UniProtKB=Q8IUE6 | Histone H2A type 2-B;H2AC21;ortholog                                   | histone(PC00118)                                      |
| HUMAN HGNC=15568 UniProtKB=Q9H299 | SH3 domain-binding glutamic acid-rich-like protein 3;SH3BGRL3;ortholog |                                                       |
| HUMAN HGNC=4563 UniProtKB=O75791  | GRB2-related adapter protein 2;GRAP2;ortholog                          |                                                       |
| HUMAN HGNC=2047 UniProtKB=O00501  | Claudin-5;CLDN5;ortholog                                               | tight junction(PC00214)                               |
| HUMAN HGNC=17060 UniProtKB=Q92845 | Kinesin-associated protein 3;KIFAP3;ortholog                           | microtubule binding motor protein(PC00156)            |
| HUMAN HGNC=16452 UniProtKB=P0DN86 | Choriogonadotropin subunit beta 3;CGB8;ortholog                        | peptide hormone(PC00179)                              |
| HUMAN HGNC=28338 UniProtKB=Q6ZUT9 | DENN domain-containing protein 5B;DENND5B;ortholog                     |                                                       |
| HUMAN HGNC=910 UniProtKB=P25311   | Zinc-alpha-2-glycoprotein;AZGP1;ortholog                               | major histocompatibility complex protein(PC00149)     |
| HUMAN HGNC=16108 UniProtKB=Q8TDL5 | BPI fold-containing family B member 1;BPIFB1;ortholog                  |                                                       |
| HUMAN HGNC=2422 UniProtKB=O75390  | Citrate synthase, mitochondrial;CS;ortholog                            | transferase(PC00220)                                  |
| HUMAN HGNC=1245 UniProtKB=P02747  | Complement C1q subcomponent subunit C;C1QC;ortholog                    |                                                       |
| HUMAN HGNC=23526 UniProtKB=Q8NE86 | Calcium uniporter protein, mitochondrial;MCU;ortholog                  |                                                       |
| HUMAN HGNC=24056 UniProtKB=Q8NHP1 | Aflatoxin B1 aldehyde reductase member 4;AKR7L;ortholog                | reductase(PC00198)                                    |
| HUMAN HGNC=782 UniProtKB=O95260   | Arginyl-tRNA--protein transferase 1;ATE1;ortholog                      | translational protein(PC00263)                        |
| HUMAN HGNC=7850 UniProtKB=P22392  | Nucleoside diphosphate kinase B;NME2;ortholog                          | kinase(PC00137)                                       |
| HUMAN HGNC=4037 UniProtKB=P06241  | Tyrosine-protein kinase Fyn;FYN;ortholog                               |                                                       |
| HUMAN HGNC=9530 UniProtKB=P25786  | Proteasome subunit alpha type-1;PSMA1;ortholog                         | protease(PC00190)                                     |
| HUMAN HGNC=5381 UniProtKB=P14735  | Insulin-degrading enzyme;IDE;ortholog                                  | metalloprotease(PC00153)                              |
| HUMAN HGNC=24811 UniProtKB=Q14554 | Protein disulfide-isomerase A5;PDIA5;ortholog                          | chaperone(PC00072)                                    |
| HUMAN HGNC=5887 UniProtKB=P01706  | Immunoglobulin lambda variable 2-11;IGLV2-11;ortholog                  | immunoglobulin(PC00123)                               |
| HUMAN HGNC=1745 UniProtKB=O00311  | Cell division cycle 7-related protein kinase;CDC7;ortholog             | non-receptor serine/threonine protein kinase(PC00167) |
| HUMAN HGNC=15588 UniProtKB=Q96C24 | Synaptotagmin-like protein 4;SYTL4;ortholog                            |                                                       |
| HUMAN HGNC=5043 UniProtKB=P31942  | Heterogeneous nuclear ribonucleoprotein H3;HNRNPH3;ortholog            | RNA splicing factor(PC00148)                          |
| HUMAN HGNC=1459 UniProtKB=Q14012  | Calcium/calmodulin-dependent protein kinase type 1;CAMK1;ortholog      | non-receptor serine/threonine protein kinase(PC00167) |

|                                      |                                                                                 |                                           |
|--------------------------------------|---------------------------------------------------------------------------------|-------------------------------------------|
| HUMAN HGNC=2362 UniProtKB=P46108     | Adapter molecule crk;CRK;ortholog                                               | scaffold/adaptor protein(PC00226)         |
| HUMAN HGNC=7734 UniProtKB=P07197     | Neurofilament medium polypeptide;NEFM;ortholog                                  |                                           |
| HUMAN HGNC=15935 UniProtKB=Q9H4I2    | Zinc fingers and homeoboxes protein 3;ZHX3;ortholog                             | homeodomain transcription factor(PC00119) |
| HUMAN HGNC=1365 UniProtKB=Q9UGQ2     | Calcium channel flower homolog;CACFD1;ortholog                                  |                                           |
| HUMAN HGNC=16831 UniProtKB=O95153    | Peripheral-type benzodiazepine receptor-associated protein 1;TSPOAP1;ortholog   |                                           |
| HUMAN HGNC=5619 UniProtKB=A0A0C4DH42 | Immunoglobulin heavy variable 3-66;IGHV3-66;ortholog                            | immunoglobulin(PC00123)                   |
| HUMAN HGNC=3757 UniProtKB=O75955     | Flotillin-1;FLOT1;ortholog                                                      |                                           |
| HUMAN HGNC=775 UniProtKB=P01008      | Antithrombin-III;SERPINC1;ortholog                                              | protease inhibitor(PC00191)               |
| HUMAN HGNC=800 UniProtKB=P50993      | Sodium/potassium-transporting ATPase subunit alpha-2;ATP1A2;ortholog            | primary active transporter(PC00068)       |
| HUMAN HGNC=612 UniProtKB=P05090      | Apolipoprotein D;APOD;ortholog                                                  | apolipoprotein(PC00052)                   |
| HUMAN HGNC=655 UniProtKB=P18085      | ADP-ribosylation factor 4;ARF4;ortholog                                         | G-protein(PC00020)                        |
| HUMAN HGNC=25364 UniProtKB=Q9H0R4    | Haloacid dehalogenase-like hydrolase domain-containing protein 2;HDHD2;ortholog | phosphatase(PC00181)                      |
| HUMAN HGNC=6513 UniProtKB=Q14847     | LIM and SH3 domain protein 1;LASP1;ortholog                                     |                                           |
| HUMAN HGNC=4384 UniProtKB=P63096     | Guanine nucleotide-binding protein G(i) subunit alpha-1;GNAI1;ortholog          | heterotrimeric G-protein(PC00117)         |
| HUMAN HGNC=11834 UniProtKB=P29401    | Transketolase;TKT;ortholog                                                      | transketolase(PC00221)                    |
| HUMAN HGNC=4116 UniProtKB=Q14376     | UDP-glucose 4-epimerase;GALE;ortholog                                           | epimerase/racemase(PC00096)               |
| HUMAN HGNC=14906 UniProtKB=Q8N4C6    | Ninein;NIN;ortholog                                                             |                                           |
| HUMAN HGNC=6047 UniProtKB=Q16891     | MICOS complex subunit MIC60;IMMT;ortholog                                       |                                           |
| HUMAN HGNC=25564 UniProtKB=Q9NVJ2    | ADP-ribosylation factor-like protein 8B;ARL8B;ortholog                          |                                           |
| HUMAN HGNC=18396 UniProtKB=O95969    | Secretoglobin family 1D member 2;SCGB1D2;ortholog                               | transfer/carrier protein(PC00219)         |
| HUMAN HGNC=1546 UniProtKB=P50454     | Serpin H1;SERPINH1;ortholog                                                     | protease inhibitor(PC00191)               |
| HUMAN HGNC=11387 UniProtKB=P31948    | Stress-induced-phosphoprotein 1;STIP1;ortholog                                  |                                           |
| HUMAN HGNC=8905 UniProtKB=P36871     | Phosphoglucomutase-1;PGM1;ortholog                                              | mutase(PC00160)                           |
| HUMAN HGNC=5270 UniProtKB=P25685     | DnaJ homolog subfamily B member 1;DNAJB1;ortholog                               | chaperone(PC00072)                        |
| HUMAN HGNC=5383 UniProtKB=P48735     | Isocitrate dehydrogenase [NADP], mitochondrial;IDH2;ortholog                    | dehydrogenase(PC00092)                    |
| HUMAN HGNC=20675 UniProtKB=Q96KN2    | Beta-Ala-His dipeptidase;CNDP1;ortholog                                         | metalloprotease(PC00153)                  |

|                                      |                                                                       |                                            |
|--------------------------------------|-----------------------------------------------------------------------|--------------------------------------------|
| HUMAN HGNC=9552 UniProtKB=P62195     | 26S proteasome regulatory subunit 8;PSMC5;ortholog                    | protease(PC00190)                          |
| HUMAN HGNC=11180 UniProtKB=P04179    | Superoxide dismutase [Mn], mitochondrial;SOD2;ortholog                | oxidoreductase(PC00176)                    |
| HUMAN HGNC=17717 UniProtKB=Q9UEW8    | STE20/SPS1-related proline-alanine-rich protein kinase;STK39;ortholog |                                            |
| HUMAN HGNC=5888 UniProtKB=P01704     | Immunoglobulin lambda variable 2-14;IGLV2-14;ortholog                 | immunoglobulin(PC00123)                    |
| HUMAN HGNC=11609 UniProtKB=P24557    | Thromboxane-A synthase;TBXAS1;ortholog                                | isomerase(PC00135)                         |
| HUMAN HGNC=18002 UniProtKB=Q9NS69    | Mitochondrial import receptor subunit TOM22 homolog;TOMM22;ortholog   | primary active transporter(PC00068)        |
| HUMAN HGNC=12405 UniProtKB=P02766    | Transthyretin;TTR;ortholog                                            | hydrolase(PC00121)                         |
| HUMAN HGNC=9846 UniProtKB=P62826     | GTP-binding nuclear protein Ran;RAN;ortholog                          | small GTPase(PC00208)                      |
| HUMAN HGNC=3658 UniProtKB=Q9UGM5     | Fetuin-B;FETUB;ortholog                                               | protease inhibitor(PC00191)                |
| HUMAN HGNC=11582 UniProtKB=Q15813    | Tubulin-specific chaperone E;TBCE;ortholog                            | chaperone(PC00072)                         |
| HUMAN HGNC=9855 UniProtKB=P62834     | Ras-related protein Rap-1A;RAP1A;ortholog                             | small GTPase(PC00208)                      |
| HUMAN HGNC=812 UniProtKB=P16615      | Sarcoplasmic/endoplasmic reticulum calcium ATPase 2;ATP2A2;ortholog   | primary active transporter(PC00068)        |
| HUMAN HGNC=11131 UniProtKB=O00161    | Synaptosomal-associated protein 23;SNAP23;ortholog                    | SNARE protein(PC00034)                     |
| HUMAN HGNC=9621 UniProtKB=Q6IBS0     | Twinfilin-2;TWF2;ortholog                                             | non-motor actin binding protein(PC00165)   |
| HUMAN HGNC=659 UniProtKB=P62330      | ADP-ribosylation factor 6;ARF6;ortholog                               | G-protein(PC00020)                         |
| HUMAN HGNC=2717 UniProtKB=Q16531     | DNA damage-binding protein 1;DDB1;ortholog                            | RNA processing factor(PC00147)             |
| HUMAN HGNC=10839 UniProtKB=P04278    | Sex hormone-binding globulin;SHBG;ortholog                            |                                            |
| HUMAN HGNC=361 UniProtKB=P00568      | Adenylate kinase isoenzyme 1;AK1;ortholog                             | nucleotide kinase(PC00172)                 |
| HUMAN HGNC=26224 UniProtKB=Q9H5Z6    | Protein FAM124B;FAM124B;ortholog                                      |                                            |
| HUMAN HGNC=2464 UniProtKB=P13611     | Versican core protein;VCAN;ortholog                                   | extracellular matrix glycoprotein(PC00100) |
| HUMAN HGNC=10055 UniProtKB=Q8N5U6    | RING finger protein 10;RNF10;ortholog                                 |                                            |
| HUMAN HGNC=5930 UniProtKB=A0A075B6I9 | Immunoglobulin lambda variable 7-46;IGLV7-46;ortholog                 | immunoglobulin(PC00123)                    |
| HUMAN HGNC=8016 UniProtKB=P46459     | Vesicle-fusing ATPase;NSF;ortholog                                    | membrane traffic protein(PC00150)          |
| HUMAN HGNC=26022 UniProtKB=Q7L0Y3    | tRNA methyltransferase 10 homolog C;TRMT10C;ortholog                  | RNA methyltransferase(PC00033)             |
| HUMAN HGNC=1325 UniProtKB=P04003     | C4b-binding protein alpha chain;C4BPA;ortholog                        |                                            |
| HUMAN HGNC=26200 UniProtKB=Q9H668    | CST complex subunit STN1;STN1;ortholog                                |                                            |

|                                   |                                                                                 |                                                      |
|-----------------------------------|---------------------------------------------------------------------------------|------------------------------------------------------|
| HUMAN HGNC=9944 UniProtKB=P35241  | Radixin;RDX;ortholog                                                            | actin or actin-binding cytoskeletal protein(PC00041) |
| HUMAN HGNC=2431 UniProtKB=P55060  | Exportin-2;CSE1L;ortholog                                                       | transporter(PC00227)                                 |
| HUMAN HGNC=2090 UniProtKB=P09496  | Clathrin light chain A;CLTA;ortholog                                            | vesicle coat protein(PC00235)                        |
| HUMAN HGNC=13572 UniProtKB=Q9Y6R7 | IgGFc-binding protein;FCGBP;ortholog                                            | extracellular matrix protein(PC00102)                |
| HUMAN HGNC=10469 UniProtKB=O95197 | Reticulon-3;RTN3;ortholog                                                       |                                                      |
| HUMAN HGNC=3600 UniProtKB=P23142  | Fibulin-1;FBLN1;ortholog                                                        |                                                      |
| HUMAN HGNC=3353 UniProtKB=P09104  | Gamma-enolase;ENO2;ortholog                                                     | lyase(PC00144)                                       |
| HUMAN HGNC=12028 UniProtKB=P14625 | Endoplasmin;HSP90B1;ortholog                                                    | Hsp90 family chaperone(PC00028)                      |
| HUMAN HGNC=29585 UniProtKB=Q8N6V9 | Testis-expressed protein 9;TEX9;ortholog                                        | actin binding motor protein(PC00040)                 |
| HUMAN HGNC=2265 UniProtKB=P13073  | Cytochrome c oxidase subunit 4 isoform 1, mitochondrial;COX4I1;ortholog         | oxidase(PC00175)                                     |
| HUMAN HGNC=26161 UniProtKB=P57737 | Coronin-7;CORO7;ortholog                                                        | non-motor actin binding protein(PC00165)             |
| HUMAN HGNC=21314 UniProtKB=Q8WXC6 | COP9 signalosome complex subunit 9;COPS9;ortholog                               |                                                      |
| HUMAN HGNC=9055 UniProtKB=Q00722  | 1-phosphatidylinositol 4,5-bisphosphate phosphodiesterase beta-2;PLCB2;ortholog | phospholipase(PC00186)                               |
| HUMAN HGNC=19071 UniProtKB=Q86V81 | THO complex subunit 4;ALYREF;ortholog                                           | RNA metabolism protein(PC00031)                      |
| HUMAN HGNC=16476 UniProtKB=Q9H0E2 | Toll-interacting protein;TOLLIP;ortholog                                        |                                                      |
| HUMAN HGNC=8912 UniProtKB=P35232  | Prohibitin;PHB;ortholog                                                         |                                                      |
| HUMAN HGNC=1473 UniProtKB=P27824  | Calnexin;CANX;ortholog                                                          | chaperone(PC00072)                                   |
| HUMAN HGNC=1063 UniProtKB=P30043  | Flavin reductase (NADPH);BLVRB;ortholog                                         | reductase(PC00198)                                   |
| HUMAN HGNC=554 UniProtKB=Q10567   | AP-1 complex subunit beta-1;AP1B1;ortholog                                      | membrane traffic protein(PC00150)                    |
| HUMAN HGNC=6526 UniProtKB=P80188  | Neutrophil gelatinase-associated lipocalin;LCN2;ortholog                        | transfer/carrier protein(PC00219)                    |
| HUMAN HGNC=833 UniProtKB=P36542   | ATP synthase subunit gamma, mitochondrial;ATP5F1C;ortholog                      | ATP synthase(PC00002)                                |
| HUMAN HGNC=3624 UniProtKB=Q15485  | Ficolin-2;FCN2;ortholog                                                         | intercellular signal molecule(PC00207)               |
| HUMAN HGNC=5606 UniProtKB=P01763  | Immunoglobulin heavy variable 3-48;IGHV3-48;ortholog                            | immunoglobulin(PC00123)                              |
| HUMAN HGNC=14569 UniProtKB=Q9UK76 | Jupiter microtubule associated homolog 1;JPT1;ortholog                          |                                                      |
| HUMAN HGNC=10701 UniProtKB=Q15436 | Protein transport protein Sec23A;SEC23A;ortholog                                | vesicle coat protein(PC00235)                        |
| HUMAN HGNC=12644 UniProtKB=Q15836 | Vesicle-associated membrane protein 3;VAMP3;ortholog                            |                                                      |

|                                                    |                                                                                    |                                              |
|----------------------------------------------------|------------------------------------------------------------------------------------|----------------------------------------------|
| HUMAN HGNC=11168 UniProtKB=Q13884                  | Beta-1-syntrophin;SNTB1;ortholog                                                   |                                              |
| HUMAN HGNC=7716 UniProtKB=P49821                   | NADH dehydrogenase [ubiquinone] flavoprotein 1, mitochondrial;NDUFV1;ortholog      | oxidoreductase(PC00176)                      |
| HUMAN HGNC=5905 UniProtKB=P80748                   | Immunoglobulin lambda variable 3-21;IGLV3-21;ortholog                              | immunoglobulin(PC00123)                      |
| HUMAN HGNC=4298 UniProtKB=P16278                   | Beta-galactosidase;GLB1;ortholog                                                   | galactosidase(PC00104)                       |
| HUMAN HGNC=16969 UniProtKB=Q92598                  | Heat shock protein 105 kDa;HSPH1;ortholog                                          |                                              |
| HUMAN HGNC=12724 UniProtKB=P04004                  | Vitronectin;VTN;ortholog                                                           |                                              |
| HUMAN HGNC=253 UniProtKB=P11766                    | Alcohol dehydrogenase class-3;ADH5;ortholog                                        | dehydrogenase(PC00092)                       |
| HUMAN HGNC=2973 UniProtKB=O00429                   | Dynamin-1-like protein;DNM1L;ortholog                                              | membrane traffic protein(PC00150)            |
| HUMAN HGNC=170 UniProtKB=P61158                    | Actin-related protein 3;ACTR3;ortholog                                             | actin and actin related protein(PC00039)     |
| HUMAN HGNC=12463 UniProtKB=P0CG47                  | Polyubiquitin-B;UBB;ortholog                                                       |                                              |
| HUMAN HGNC=30866 UniProtKB=Q8IX04                  | Ubiquitin-conjugating enzyme E2 variant 3;UEVLD;ortholog                           | ubiquitin-protein ligase(PC00234)            |
| HUMAN HGNC=4844 UniProtKB=P14317                   | Hematopoietic lineage cell-specific protein;HCLS1;ortholog                         | non-motor actin binding protein(PC00165)     |
| HUMAN HGNC=9922 UniProtKB=P02753                   | Retinol-binding protein 4;RBP4;ortholog                                            | transfer/carrier protein(PC00219)            |
| HUMAN HGNC=3616 UniProtKB=P12318                   | Low affinity immunoglobulin gamma Fc region receptor II-a;FCGR2A;ortholog          | immunoglobulin receptor superfamily(PC00124) |
| HUMAN HGNC=11579 UniProtKB=O75347                  | Tubulin-specific chaperone A;TBCA;ortholog                                         | chaperonin(PC00073)                          |
| HUMAN HGNC=30389 UniProtKB=Q96A65                  | Exocyst complex component 4;EXOC4;ortholog                                         | membrane traffic protein(PC00150)            |
| HUMAN Ensembl=ENSGO0000282639 UniProtKB=A0A0J9YX35 | Immunoglobulin heavy variable 3-64D;IGHV3-64D;ortholog                             | immunoglobulin(PC00123)                      |
| HUMAN HGNC=26195 UniProtKB=Q86XH1                  | Dynein regulatory complex protein 11;IQCA1;ortholog                                |                                              |
| HUMAN HGNC=20120 UniProtKB=Q17RC7                  | Exocyst complex component 3-like protein 4;EXOC3L4;ortholog                        | membrane traffic protein(PC00150)            |
| HUMAN HGNC=10372 UniProtKB=P05386                  | 60S acidic ribosomal protein P1;RPLP1;ortholog                                     | ribosomal protein(PC00202)                   |
| HUMAN HGNC=28235 UniProtKB=Q96IU4                  | Protein ABHD14B;ABHD14B;ortholog                                                   |                                              |
| HUMAN HGNC=19267 UniProtKB=Q8NFP4                  | MAM domain-containing glycosylphosphatidylinositol anchor protein 1;MDGA1;ortholog |                                              |
| HUMAN HGNC=9535 UniProtKB=P60900                   | Proteasome subunit alpha type-6;PSMA6;ortholog                                     | protease(PC00190)                            |
| HUMAN HGNC=1742 UniProtKB=P50851                   | Lipopolysaccharide-responsive and beige-like anchor protein;LRBA;ortholog          |                                              |
| HUMAN HGNC=19194 UniProtKB=Q96RW7                  | Hemicentin-1;HMCN1;ortholog                                                        |                                              |
| HUMAN HGNC=380 UniProtKB=P14550                    | Aldo-keto reductase family 1 member A1;AKR1A1;ortholog                             | reductase(PC00198)                           |

|                                      |                                                                      |                                                       |
|--------------------------------------|----------------------------------------------------------------------|-------------------------------------------------------|
| HUMAN HGNC=9069 UniProtKB=Q15149     | Plectin;PLEC;ortholog                                                | intermediate filament binding protein(PC00130)        |
| HUMAN HGNC=6876 UniProtKB=Q16539     | Mitogen-activated protein kinase 14;MAPK14;ortholog                  | non-receptor serine/threonine protein kinase(PC00167) |
| HUMAN HGNC=30384 UniProtKB=Q9UMX5    | Neudesin;NENF;ortholog                                               | transmembrane signal receptor(PC00197)                |
| HUMAN HGNC=15679 UniProtKB=Q8WZ74    | Cortactin-binding protein 2;CTTNBP2;ortholog                         |                                                       |
| HUMAN HGNC=20774 UniProtKB=P04350    | Tubulin beta-4A chain;TUBB4A;ortholog                                | tubulin(PC00228)                                      |
| HUMAN HGNC=14237 UniProtKB=Q96NT3    | Protein GUCD1;GUCD1;ortholog                                         | guanylate cyclase(PC00114)                            |
| HUMAN HGNC=14511 UniProtKB=P82663    | 28S ribosomal protein S25, mitochondrial;MRPS25;ortholog             | ribosomal protein(PC00202)                            |
| HUMAN HGNC=14545 UniProtKB=Q8IV61    | Ras guanyl-releasing protein 3;RASGRP3;ortholog                      | guanyl-nucleotide exchange factor(PC00113)            |
| HUMAN HGNC=14362 UniProtKB=Q7Z5P9    | Mucin-19;MUC19;ortholog                                              |                                                       |
| HUMAN HGNC=18807 UniProtKB=O94983    | Calmodulin-binding transcription activator 2;CAMTA2;ortholog         | DNA-binding transcription factor(PC00218)             |
| HUMAN HGNC=11231 UniProtKB=Q8WXF7    | Atlastin-1;ATL1;ortholog                                             | heterotrimeric G-protein(PC00117)                     |
| HUMAN HGNC=12476 UniProtKB=P61077    | Ubiquitin-conjugating enzyme E2 D3;UBE2D3;ortholog                   | ubiquitin-protein ligase(PC00234)                     |
| HUMAN HGNC=6142 UniProtKB=P23229     | Integrin alpha-6;ITGA6;ortholog                                      | integrin(PC00126)                                     |
| HUMAN HGNC=20356 UniProtKB=Q9BXV9    | EKC/KEOPS complex subunit GON7;GON7;ortholog                         |                                                       |
| HUMAN HGNC=16937 UniProtKB=O75915    | PRA1 family protein 3;ARL6IP5;ortholog                               | amino acid transporter(PC00046)                       |
| HUMAN HGNC=26378 UniProtKB=Q8N7C3    | Probable E3 ubiquitin-protein ligase TRIML2;TRIML2;ortholog          | ubiquitin-protein ligase(PC00234)                     |
| HUMAN HGNC=6149 UniProtKB=P11215     | Integrin alpha-M;ITGAM;ortholog                                      | integrin(PC00126)                                     |
| HUMAN HGNC=13520 UniProtKB=Q14696    | LRP chaperone MESD;MESD;ortholog                                     |                                                       |
| HUMAN HGNC=3265 UniProtKB=P05198     | Eukaryotic translation initiation factor 2 subunit 1;EIF2S1;ortholog | translation initiation factor(PC00224)                |
| HUMAN HGNC=19388 UniProtKB=P49593    | Protein phosphatase 1F;PPM1F;ortholog                                | protein phosphatase(PC00195)                          |
| HUMAN HGNC=3297 UniProtKB=P78344     | Eukaryotic translation initiation factor 4 gamma 2;EIF4G2;ortholog   | translation initiation factor(PC00224)                |
| HUMAN HGNC=5657 UniProtKB=P0DP08     | Immunoglobulin heavy variable 4-38-2;IGHV4-38-2;ortholog             | immunoglobulin(PC00123)                               |
| HUMAN HGNC=1615 UniProtKB=P78371     | T-complex protein 1 subunit beta;CCT2;ortholog                       | chaperonin(PC00073)                                   |
| HUMAN HGNC=5553 UniProtKB=A0A0A0MS14 | Immunoglobulin heavy variable 1-45;IGHV1-45;ortholog                 | immunoglobulin(PC00123)                               |
| HUMAN HGNC=20766 UniProtKB=Q71U36    | Tubulin alpha-1A chain;TUBA1A;ortholog                               | tubulin(PC00228)                                      |
| HUMAN HGNC=226 UniProtKB=P78563      | Double-stranded RNA-specific editase 1;ADARB1;ortholog               | RNA metabolism protein(PC00031)                       |

|                                      |                                                                 |                                                 |
|--------------------------------------|-----------------------------------------------------------------|-------------------------------------------------|
| HUMAN HGNC=12590 UniProtKB=P07919    | Cytochrome b-c1 complex subunit 6, mitochondrial;UQCRH;ortholog | reductase(PC00198)                              |
| HUMAN HGNC=8903 UniProtKB=Q95336     | 6-phosphogluconolactonase;PGLS;ortholog                         | hydrolase(PC00121)                              |
| HUMAN HGNC=9788 UniProtKB=P51149     | Ras-related protein Rab-7a;RAB7A;ortholog                       |                                                 |
| HUMAN HGNC=20434 UniProtKB=Q86YW5    | Trem-like transcript 1 protein;TREML1;ortholog                  | immunoglobulin receptor superfamily(PC00124)    |
| HUMAN HGNC=9554 UniProtKB=Q99460     | 26S proteasome non-ATPase regulatory subunit 1;PSMD1;ortholog   | protease(PC00190)                               |
| HUMAN HGNC=3755 UniProtKB=O75369     | Filamin-B;FLNB;ortholog                                         |                                                 |
| HUMAN HGNC=55 UniProtKB=O15439       | Multidrug resistance-associated protein 4;ABCC4;ortholog        | ATP-binding cassette (ABC) transporter(PC00003) |
| HUMAN HGNC=5861 UniProtKB=A0M8Q6     | Immunoglobulin lambda constant 7;IGLC7;ortholog                 | immunoglobulin(PC00123)                         |
| HUMAN HGNC=24878 UniProtKB=Q9BVK6    | Transmembrane emp24 domain-containing protein 9;TMED9;ortholog  | vesicle coat protein(PC00235)                   |
| HUMAN HGNC=5528 UniProtKB=P01861     | Immunoglobulin heavy constant gamma 4;IGHG4;ortholog            | immunoglobulin(PC00123)                         |
| HUMAN HGNC=5588 UniProtKB=P01764     | Immunoglobulin heavy variable 3-23;IGHV3-23;ortholog            | immunoglobulin(PC00123)                         |
| HUMAN HGNC=26639 UniProtKB=Q8NBI6    | Xyloside xylosyltransferase 1;XXYLT1;ortholog                   | transferase(PC00220)                            |
| HUMAN HGNC=25346 UniProtKB=Q5RHP9    | Glutamate-rich protein 3;ERICH3;ortholog                        |                                                 |
| HUMAN HGNC=2690 UniProtKB=P07108     | Acyl-CoA-binding protein;DBI;ortholog                           | transfer/carrier protein(PC00219)               |
| HUMAN HGNC=23845 UniProtKB=Q8IY92    | Structure-specific endonuclease subunit SLX4;SLX4;ortholog      |                                                 |
| HUMAN HGNC=82 UniProtKB=P09110       | 3-ketoacyl-CoA thiolase, peroxisomal;ACAA1;ortholog             | acetyltransferase(PC00038)                      |
| HUMAN HGNC=23212 UniProtKB=Q7Z406    | Myosin-14;MYH14;ortholog                                        |                                                 |
| HUMAN HGNC=5659 UniProtKB=A0A0C4DH38 | Immunoglobulin heavy variable 5-51;IGHV5-51;ortholog            | immunoglobulin(PC00123)                         |
| HUMAN HGNC=2313 UniProtKB=P22792     | Carboxypeptidase N subunit 2;CPN2;ortholog                      | transmembrane signal receptor(PC00197)          |
| HUMAN HGNC=118 UniProtKB=Q99798      | Aconitate hydratase, mitochondrial;ACO2;ortholog                | hydratase(PC00120)                              |
| HUMAN HGNC=5825 UniProtKB=A0A0C4DH25 | Immunoglobulin kappa variable 3D-20;IGKV3D-20;ortholog          | immunoglobulin(PC00123)                         |
| HUMAN HGNC=5525 UniProtKB=P01857     | Immunoglobulin heavy constant gamma 1;IGHG1;ortholog            | immunoglobulin(PC00123)                         |
| HUMAN HGNC=25087 UniProtKB=Q8IWE2    | Protein NOXP20;FAM114A1;ortholog                                |                                                 |
| HUMAN HGNC=29284 UniProtKB=Q9P265    | Disco-interacting protein 2 homolog B;DIP2B;ortholog            |                                                 |
| HUMAN HGNC=2850 UniProtKB=Q9Y6T7     | Diacylglycerol kinase beta;DGKB;ortholog                        | kinase(PC00137)                                 |
| HUMAN HGNC=6737 UniProtKB=O75608     | Acyl-protein thioesterase 1;LYPLA1;ortholog                     | phospholipase(PC00186)                          |
| HUMAN HGNC=9666 UniProtKB=P08575     | Receptor-type tyrosine-protein phosphatase C;PTPRC;ortholog     | protein phosphatase(PC00195)                    |



|                                      |                                                                      |                                                |
|--------------------------------------|----------------------------------------------------------------------|------------------------------------------------|
| HUMAN HGNC=6890 UniProtKB=Q15691     | Microtubule-associated protein RP/EB family member 1;MAPRE1;ortholog | non-motor microtubule binding protein(PC00166) |
| HUMAN HGNC=1346 UniProtKB=P10643     | Complement component C7;C7;ortholog                                  |                                                |
| HUMAN HGNC=25490 UniProtKB=Q96HA8    | Protein N-terminal glutamine amidohydrolase;NTAQ1;ortholog           |                                                |
| HUMAN HGNC=4244 UniProtKB=O00451     | GDNF family receptor alpha-2;GFRA2;ortholog                          | transmembrane signal receptor(PC00197)         |
| HUMAN HGNC=15722 UniProtKB=Q8WXQ8    | Carboxypeptidase A5;CPA5;ortholog                                    | metalloprotease(PC00153)                       |
| HUMAN HGNC=5563 UniProtKB=A0A075B7D0 | Ig-like domain-containing protein;IGHV1OR15-1;ortholog               | immunoglobulin(PC00123)                        |
| HUMAN HGNC=10840 UniProtKB=P29353    | SHC-transforming protein 1;SHC1;ortholog                             | scaffold/adaptor protein(PC00226)              |
| HUMAN HGNC=27302 UniProtKB=Q5T440    | Putative transferase CAF17, mitochondrial;IBA57;ortholog             |                                                |
| HUMAN HGNC=5141 UniProtKB=P00738     | Haptoglobin;HP;ortholog                                              | serine protease(PC00203)                       |
| HUMAN HGNC=9349 UniProtKB=Q9NQX1     | PR domain zinc finger protein 5;PRDM5;ortholog                       | C2H2 zinc finger transcription factor(PC00248) |
| HUMAN HGNC=2711 UniProtKB=Q14203     | Dynactin subunit 1;DCTN1;ortholog                                    | chaperone(PC00072)                             |
| HUMAN HGNC=10404 UniProtKB=P15880    | 40S ribosomal protein S2;RPS2;ortholog                               | ribosomal protein(PC00202)                     |
| HUMAN HGNC=3011 UniProtKB=Q07507     | Dermatopontin;DPT;ortholog                                           | cell adhesion molecule(PC00069)                |
| HUMAN HGNC=16053 UniProtKB=Q8N1V2    | Cilia- and flagella-associated protein 52;CFAP52;ortholog            |                                                |
| HUMAN HGNC=23818 UniProtKB=Q14684    | Ribosomal RNA processing protein 1 homolog B;RRP1B;ortholog          |                                                |
| HUMAN HGNC=2482 UniProtKB=P04080     | Cystatin-B;CSTB;ortholog                                             | protease inhibitor(PC00191)                    |
| HUMAN HGNC=813 UniProtKB=Q93084      | Sarcoplasmic/endoplasmic reticulum calcium ATPase 3;ATP2A3;ortholog  | primary active transporter(PC00068)            |
| HUMAN HGNC=9813 UniProtKB=P54727     | UV excision repair protein RAD23 homolog B;RAD23B;ortholog           | damaged DNA-binding protein(PC00086)           |
| HUMAN HGNC=117 UniProtKB=P21399      | Cytoplasmic aconitate hydratase;ACO1;ortholog                        | RNA metabolism protein(PC00031)                |
| HUMAN HGNC=8906 UniProtKB=Q96G03     | Phosphoglucomutase-2;PGM2;ortholog                                   | mutase(PC00160)                                |
| HUMAN HGNC=463 UniProtKB=Q9UKV5      | E3 ubiquitin-protein ligase AMFR;AMFR;ortholog                       | ubiquitin-protein ligase(PC00234)              |
| HUMAN HGNC=13061 UniProtKB=Q14587    | Zinc finger protein 268;ZNF268;ortholog                              | C2H2 zinc finger transcription factor(PC00248) |
| HUMAN HGNC=7687 UniProtKB=O00483     | Cytochrome c oxidase subunit NDUFA4;NDUFA4;ortholog                  | oxidoreductase(PC00176)                        |
| HUMAN HGNC=15532 UniProtKB=Q9BX67    | Junctional adhesion molecule C;JAM3;ortholog                         |                                                |
| HUMAN HGNC=30594 UniProtKB=Q9H3U1    | Protein unc-45 homolog A;UNC45A;ortholog                             |                                                |
| HUMAN HGNC=9761 UniProtKB=Q15907     | Ras-related protein Rab-11B;RAB11B;ortholog                          |                                                |

|                                   |                                                                            |                                                      |
|-----------------------------------|----------------------------------------------------------------------------|------------------------------------------------------|
| HUMAN HGNC=5244 UniProtKB=P38646  | Stress-70 protein, mitochondrial;HSPA9;ortholog                            |                                                      |
| HUMAN HGNC=4851 UniProtKB=P42858  | Huntingtin;HTT;ortholog                                                    |                                                      |
| HUMAN HGNC=11869 UniProtKB=Q9UHN6 | Cell surface hyaluronidase;CEMIP2;ortholog                                 |                                                      |
| HUMAN HGNC=7515 UniProtKB=P98088  | Mucin-5AC;MUC5AC;ortholog                                                  | extracellular matrix protein(PC00102)                |
| HUMAN HGNC=7198 UniProtKB=Q86VD1  | MORC family CW-type zinc finger protein 1;MORC1;ortholog                   |                                                      |
| HUMAN HGNC=1354 UniProtKB=P07360  | Complement component C8 gamma chain;C8G;ortholog                           |                                                      |
| HUMAN HGNC=11740 UniProtKB=P02787 | Serotransferrin;TF;ortholog                                                | transfer/carrier protein(PC00219)                    |
| HUMAN HGNC=6971 UniProtKB=P40926  | Malate dehydrogenase, mitochondrial;MDH2;ortholog                          | dehydrogenase(PC00092)                               |
| HUMAN HGNC=34489 UniProtKB=A8K5M9 | Uncharacterized protein C15orf62, mitochondrial;C15orf62;ortholog          |                                                      |
| HUMAN HGNC=30004 UniProtKB=P0DMN0 | Sulfotransferase 1A4;SULT1A4;ortholog                                      | transferase(PC00220)                                 |
| HUMAN HGNC=10992 UniProtKB=P12236 | ADP/ATP translocase 3;SLC25A6;ortholog                                     | transfer/carrier protein(PC00219)                    |
| HUMAN HGNC=17474 UniProtKB=Q96AP7 | Endothelial cell-selective adhesion molecule;ESAM;ortholog                 |                                                      |
| HUMAN HGNC=4762 UniProtKB=P57053  | Histone H2B type F-S;H2BS1;ortholog                                        | histone(PC00118)                                     |
| HUMAN HGNC=17894 UniProtKB=Q14966 | Zinc finger protein 638;ZNF638;ortholog                                    |                                                      |
| HUMAN HGNC=12691 UniProtKB=P15311 | Ezrin;EZR;ortholog                                                         | actin or actin-binding cytoskeletal protein(PC00041) |
| HUMAN HGNC=3354 UniProtKB=P13929  | Beta-enolase;ENO3;ortholog                                                 | lyase(PC00144)                                       |
| HUMAN HGNC=7568 UniProtKB=P35580  | Myosin-10;MYH10;ortholog                                                   |                                                      |
| HUMAN HGNC=16804 UniProtKB=O00308 | NEDD4-like E3 ubiquitin-protein ligase WWP2;WWP2;ortholog                  | ubiquitin-protein ligase(PC00234)                    |
| HUMAN HGNC=10494 UniProtKB=P26447 | Protein S100-A4;S100A4;ortholog                                            | calmodulin-related(PC00061)                          |
| HUMAN HGNC=19747 UniProtKB=Q86UK5 | Limbin;EVC2;ortholog                                                       |                                                      |
| HUMAN HGNC=8766 UniProtKB=Q8WUM4  | Programmed cell death 6-interacting protein;PDCD6IP;ortholog               | membrane traffic protein(PC00150)                    |
| HUMAN HGNC=3252 UniProtKB=O14602  | Eukaryotic translation initiation factor 1A, Y-chromosomal;EIF1AY;ortholog | translation initiation factor(PC00224)               |
| HUMAN HGNC=25234 UniProtKB=Q9BUV0 | Arginine/serine-rich protein 1;RSRP1;ortholog                              |                                                      |
| HUMAN HGNC=19155 UniProtKB=P57773 | Gap junction alpha-9 protein;GJA9;ortholog                                 | gap junction(PC00105)                                |
| HUMAN HGNC=8569 UniProtKB=P29122  | Proprotein convertase subtilisin/kexin type 6;PCSK6;ortholog               | serine protease(PC00203)                             |
| HUMAN HGNC=28477 UniProtKB=Q8NBM8 | Prenylcysteine oxidase-like;PCYOX1L;ortholog                               | lyase(PC00144)                                       |

|                                   |                                                                                                                                |                                                  |
|-----------------------------------|--------------------------------------------------------------------------------------------------------------------------------|--------------------------------------------------|
| HUMAN HGNC=23243 UniProtKB=Q9NQR7 | Coiled-coil domain-containing protein 177;CCDC177;ortholog                                                                     |                                                  |
| HUMAN HGNC=24103 UniProtKB=Q9H1I8 | Activating signal cointegrator 1 complex subunit 2;ASCC2;ortholog                                                              |                                                  |
| HUMAN HGNC=5817 UniProtKB=P01619  | Immunoglobulin kappa variable 3-20;IGKV3-20;ortholog                                                                           | immunoglobulin(PC00123)                          |
| HUMAN HGNC=23168 UniProtKB=Q8IYD8 | Fanconi anemia group M protein;FANCM;ortholog                                                                                  | DNA metabolism protein(PC00009)                  |
| HUMAN HGNC=6427 UniProtKB=Q04695  | Keratin, type I cytoskeletal 17;KRT17;ortholog                                                                                 |                                                  |
| HUMAN HGNC=26363 UniProtKB=Q86YJ7 | Ankyrin repeat domain-containing protein 13B;ANKRD13B;ortholog                                                                 |                                                  |
| HUMAN HGNC=9758 UniProtKB=P62820  | Ras-related protein Rab-1A;RAB1A;ortholog                                                                                      |                                                  |
| HUMAN HGNC=18142 UniProtKB=Q9Y4D1 | Disheveled-associated activator of morphogenesis 1;DAAM1;ortholog                                                              |                                                  |
| HUMAN HGNC=21685 UniProtKB=Q6YHK3 | CD109 antigen;CD109;ortholog                                                                                                   | protease inhibitor(PC00191)                      |
| HUMAN HGNC=15527 UniProtKB=Q86Z14 | Beta-klotho;KLB;ortholog                                                                                                       | glycosidase(PC00110)                             |
| HUMAN HGNC=15985 UniProtKB=Q4LDE5 | Sushi, von Willebrand factor type A, EGF and pentraxin domain-containing protein 1;SVEP1;ortholog                              |                                                  |
| HUMAN HGNC=12586 UniProtKB=P22695 | Cytochrome b-c1 complex subunit 2, mitochondrial;UQCRC2;ortholog                                                               | metalloprotease(PC00153)                         |
| HUMAN HGNC=8891 UniProtKB=P52209  | 6-phosphogluconate dehydrogenase, decarboxylating;PGD;ortholog                                                                 | dehydrogenase(PC00092)                           |
| HUMAN HGNC=14669 UniProtKB=P81605 | Dermcidin;DCD;ortholog                                                                                                         |                                                  |
| HUMAN HGNC=9533 UniProtKB=P25789  | Proteasome subunit alpha type-4;PSMA4;ortholog                                                                                 | protease(PC00190)                                |
| HUMAN HGNC=1050 UniProtKB=P55957  | BH3-interacting domain death agonist;BID;ortholog                                                                              |                                                  |
| HUMAN HGNC=9785 UniProtKB=P51148  | Ras-related protein Rab-5C;RAB5C;ortholog                                                                                      |                                                  |
| HUMAN HGNC=6501 UniProtKB=P13473  | Lysosome-associated membrane glycoprotein 2;LAMP2;ortholog                                                                     | membrane trafficking regulatory protein(PC00151) |
| HUMAN HGNC=15480 UniProtKB=Q9NSV4 | Protein diaphanous homolog 3;DIAPH3;ortholog                                                                                   |                                                  |
| HUMAN HGNC=3540 UniProtKB=Q96RI0  | Proteinase-activated receptor 4;F2RL3;ortholog                                                                                 | G-protein coupled receptor(PC00021)              |
| HUMAN HGNC=2911 UniProtKB=P36957  | Dihydrolipoyllysine-residue succinyltransferase component of 2-oxoglutarate dehydrogenase complex, mitochondrial;DLST;ortholog | transferase(PC00220)                             |
| HUMAN HGNC=13954 UniProtKB=O60814 | Histone H2B type 1-K;H2BC12;ortholog                                                                                           | histone(PC00118)                                 |
| HUMAN HGNC=25501 UniProtKB=Q9NW68 | BSD domain-containing protein 1;BSDC1;ortholog                                                                                 |                                                  |
| HUMAN HGNC=5479 UniProtKB=P01877  | Immunoglobulin heavy constant alpha 2;IGHA2;ortholog                                                                           | immunoglobulin(PC00123)                          |
| HUMAN HGNC=2678 UniProtKB=P14868  | Aspartate--tRNA ligase, cytoplasmic;DARS1;ortholog                                                                             | aminoacyl-tRNA synthetase(PC00047)               |

|                                       |                                                                     |                                                                  |
|---------------------------------------|---------------------------------------------------------------------|------------------------------------------------------------------|
| HUMAN HGNC=1743 UniProtKB=Q99459      | Cell division cycle 5-like protein;CDC5L;ortholog                   |                                                                  |
| HUMAN HGNC=18647 UniProtKB=Q8WWV3     | Reticulon-4-interacting protein 1, mitochondrial;RTN4IP1;ortholog   | dehydrogenase(PC00092)                                           |
| HUMAN HGNC=10608 UniProtKB=P47872     | Secretin receptor;SCTR;ortholog                                     | transmembrane signal receptor(PC00197)                           |
| HUMAN HGNC=51815 UniProtKB=A0A1W2PPM1 | Cytoplasmic polyadenylated homeobox-like;CPHXL;ortholog             | homeodomain transcription factor(PC00119)                        |
| HUMAN HGNC=561 UniProtKB=O95782       | AP-2 complex subunit alpha-1;AP2A1;ortholog                         | membrane traffic protein(PC00150)                                |
| HUMAN HGNC=1874 UniProtKB=P23528      | Cofilin-1;CFL1;ortholog                                             | non-motor actin binding protein(PC00165)                         |
| HUMAN HGNC=11408 UniProtKB=Q13043     | Serine/threonine-protein kinase 4;STK4;ortholog                     | non-receptor serine/threonine protein kinase(PC00167)            |
| HUMAN HGNC=3534 UniProtKB=P05160      | Coagulation factor XIII B chain;F13B;ortholog                       |                                                                  |
| HUMAN HGNC=15848 UniProtKB=Q14141     | Septin-6;SEPTIN6;ortholog                                           | cytoskeletal protein(PC00085)                                    |
| HUMAN HGNC=30282 UniProtKB=Q3MIN7     | Ral guanine nucleotide dissociation stimulator-like 3;RGL3;ortholog | guanyl-nucleotide exchange factor(PC00113)                       |
| HUMAN HGNC=26664 UniProtKB=Q8N841     | Tubulin polyglutamylase TTL6;TTL6;ortholog                          | microtubule or microtubule-binding cytoskeletal protein(PC00157) |
| HUMAN HGNC=25648 UniProtKB=Q8N5J2     | Ubiquitin carboxyl-terminal hydrolase MINDY-1;MINDY1;ortholog       |                                                                  |
| HUMAN HGNC=29084 UniProtKB=O75123     | Zinc finger protein 623;ZNF623;ortholog                             |                                                                  |
| HUMAN HGNC=29608 UniProtKB=Q86UE4     | Protein LYRIC;MTDH;ortholog                                         |                                                                  |
| HUMAN HGNC=16298 UniProtKB=Q504T8     | Midnolin;MIDN;ortholog                                              |                                                                  |
| HUMAN HGNC=14388 UniProtKB=Q9HCN6     | Platelet glycoprotein VI;GP6;ortholog                               | immunoglobulin receptor superfamily(PC00124)                     |
| HUMAN HGNC=12879 UniProtKB=P21506     | Zinc finger protein 10;ZNF10;ortholog                               | C2H2 zinc finger transcription factor(PC00248)                   |
| HUMAN HGNC=23147 UniProtKB=Q70J99     | Protein unc-13 homolog D;UNC13D;ortholog                            |                                                                  |
| HUMAN HGNC=12591 UniProtKB=P06132     | Uroporphyrinogen decarboxylase;UROD;ortholog                        | methyltransferase(PC00155)                                       |
| HUMAN HGNC=12665 UniProtKB=P18206     | Vinculin;VCL;ortholog                                               |                                                                  |
| HUMAN HGNC=9859 UniProtKB=P52306      | Rap1 GTPase-GDP dissociation stimulator 1;RAP1GDS1;ortholog         |                                                                  |
| HUMAN HGNC=555 UniProtKB=O43747       | AP-1 complex subunit gamma-1;AP1G1;ortholog                         | membrane traffic protein(PC00150)                                |
| HUMAN HGNC=28422 UniProtKB=Q8NCE0     | tRNA-splicing endonuclease subunit Sen2;TSEN2;ortholog              | endodeoxyribonuclease(PC00093)                                   |
| HUMAN HGNC=25654 UniProtKB=Q86YA3     | Protein ZGRF1;ZGRF1;ortholog                                        |                                                                  |

|                                   |                                                                                                       |                                                              |
|-----------------------------------|-------------------------------------------------------------------------------------------------------|--------------------------------------------------------------|
| HUMAN HGNC=992 UniProtKB=Q07817   | Bcl-2-like protein 1;BCL2L1;ortholog                                                                  |                                                              |
| HUMAN HGNC=492 UniProtKB=P16157   | Ankyrin-1;ANK1;ortholog                                                                               |                                                              |
| HUMAN HGNC=23416 UniProtKB=Q641Q2 | WASH complex subunit 2A;WASHC2A;ortholog                                                              | scaffold/adaptor protein(PC00226)                            |
| HUMAN HGNC=2230 UniProtKB=P53621  | Coatamer subunit alpha;COPA;ortholog                                                                  | vesicle coat protein(PC00235)                                |
| HUMAN HGNC=25620 UniProtKB=Q8WWA1 | Transmembrane protein 40;TMEM40;ortholog                                                              |                                                              |
| HUMAN HGNC=6156 UniProtKB=P05106  | Integrin beta-3;ITGB3;ortholog                                                                        | integrin(PC00126)                                            |
| HUMAN HGNC=6412 UniProtKB=P04264  | Keratin, type II cytoskeletal 1;KRT1;ortholog                                                         |                                                              |
| HUMAN HGNC=9253 UniProtKB=P62937  | Peptidyl-prolyl cis-trans isomerase A;PPIA;ortholog                                                   | chaperone(PC00072)                                           |
| HUMAN HGNC=5741 UniProtKB=P01602  | Immunoglobulin kappa variable 1-5;IGKV1-5;ortholog                                                    | immunoglobulin(PC00123)                                      |
| HUMAN HGNC=13485 UniProtKB=Q9BXU7 | Ubiquitin carboxyl-terminal hydrolase 26;USP26;ortholog                                               | cysteine protease(PC00081)                                   |
| HUMAN HGNC=9354 UniProtKB=P30048  | Thioredoxin-dependent peroxide reductase, mitochondrial;PRDX3;ortholog                                | peroxidase(PC00180)                                          |
| HUMAN HGNC=12492 UniProtKB=P61088 | Ubiquitin-conjugating enzyme E2 N;UBE2N;ortholog                                                      | ubiquitin-protein ligase(PC00234)                            |
| HUMAN HGNC=251 UniProtKB=P00326   | Alcohol dehydrogenase 1C;ADH1C;ortholog                                                               | dehydrogenase(PC00092)                                       |
| HUMAN HGNC=24358 UniProtKB=Q9H2G4 | Testis-specific Y-encoded-like protein 2;TSPYL2;ortholog                                              | chromatin/chromatin-binding, or -regulatory protein(PC00077) |
| HUMAN HGNC=9725 UniProtKB=P06737  | Glycogen phosphorylase, liver form;PYGL;ortholog                                                      | glycosyltransferase(PC00111)                                 |
| HUMAN HGNC=42937 UniProtKB=P0DMEO | Protein SETSIP;SETSIP;ortholog                                                                        | chromatin/chromatin-binding, or -regulatory protein(PC00077) |
| HUMAN HGNC=22125 UniProtKB=Q95522 | PRAME family member 12;PRAMEF12;ortholog                                                              |                                                              |
| HUMAN HGNC=2988 UniProtKB=Q92608  | Dedicator of cytokinesis protein 2;DOCK2;ortholog                                                     | guanyl-nucleotide exchange factor(PC00113)                   |
| HUMAN HGNC=28472 UniProtKB=Q9BTV4 | Transmembrane protein 43;TMEM43;ortholog                                                              |                                                              |
| HUMAN HGNC=14258 UniProtKB=Q9Y5K6 | CD2-associated protein;CD2AP;ortholog                                                                 |                                                              |
| HUMAN HGNC=4746 UniProtKB=P62807  | Histone H2B type 1-C/E/F/G/I;H2BC4;ortholog                                                           | histone(PC00118)                                             |
| HUMAN HGNC=9862 UniProtKB=P61225  | Ras-related protein Rap-2b;RAP2B;ortholog                                                             | small GTPase(PC00208)                                        |
| HUMAN HGNC=19760 UniProtKB=Q96T51 | RUN and FYVE domain-containing protein 1;RUFY1;ortholog                                               |                                                              |
| HUMAN HGNC=17973 UniProtKB=Q9P109 | Beta-1,3-galactosyl-O-glycosyl-glycoprotein beta-1,6-N-acetylglucosaminyltransferase 4;GCNT4;ortholog | glycosyltransferase(PC00111)                                 |
| HUMAN HGNC=22958 UniProtKB=Q9NR12 | PDZ and LIM domain protein 7;PDLIM7;ortholog                                                          | actin or actin-binding cytoskeletal protein(PC00041)         |

|                                   |                                                                       |                                                              |
|-----------------------------------|-----------------------------------------------------------------------|--------------------------------------------------------------|
| HUMAN HGNC=6463 UniProtKB=O43790  | Keratin, type II cuticular Hb6;KRT86;ortholog                         |                                                              |
| HUMAN HGNC=17376 UniProtKB=Q9UIJ7 | GTP:AMP phosphotransferase AK3, mitochondrial;AK3;ortholog            | nucleotide kinase(PC00172)                                   |
| HUMAN HGNC=8955 UniProtKB=P50453  | Serpin B9;SERPINB9;ortholog                                           | protease inhibitor(PC00191)                                  |
| HUMAN HGNC=8861 UniProtKB=P02776  | Platelet factor 4;PF4;ortholog                                        | chemokine(PC00074)                                           |
| HUMAN HGNC=21054 UniProtKB=Q86UC2 | Radial spoke head protein 3 homolog;RSPH3;ortholog                    | structural protein(PC00211)                                  |
| HUMAN HGNC=10760 UniProtKB=Q01105 | Protein SET;SET;ortholog                                              | chromatin/chromatin-binding, or -regulatory protein(PC00077) |
| HUMAN HGNC=18173 UniProtKB=Q9NZ08 | Endoplasmic reticulum aminopeptidase 1;ERAP1;ortholog                 | metalloprotease(PC00153)                                     |
| HUMAN HGNC=5785 UniProtKB=P06310  | Immunoglobulin kappa variable 2-30;IGKV2-30;ortholog                  | immunoglobulin(PC00123)                                      |
| HUMAN HGNC=24485 UniProtKB=Q9UFP1 | Golgi-associated kinase 1A;GASK1A;ortholog                            |                                                              |
| HUMAN HGNC=9604 UniProtKB=P23219  | Prostaglandin G/H synthase 1;PTGS1;ortholog                           | oxygenase(PC00177)                                           |
| HUMAN HGNC=6407 UniProtKB=P01116  | GTPase KRas;KRAS;ortholog                                             | small GTPase(PC00208)                                        |
| HUMAN HGNC=29502 UniProtKB=Q0ZLH3 | Pejvakin;PJVK;ortholog                                                |                                                              |
| HUMAN HGNC=37237 UniProtKB=A6NDY0 | Embryonic polyadenylate-binding protein 2;PABPN1L;ortholog            | translation initiation factor(PC00224)                       |
| HUMAN HGNC=11148 UniProtKB=Q16658 | Fascin;FSCN1;ortholog                                                 | non-motor actin binding protein(PC00165)                     |
| HUMAN HGNC=8504 UniProtKB=Q969R2  | Oxysterol-binding protein 2;OSBP2;ortholog                            |                                                              |
| HUMAN HGNC=16090 UniProtKB=O00264 | Membrane-associated progesterone receptor component 1;PGRMC1;ortholog | transmembrane signal receptor(PC00197)                       |
| HUMAN HGNC=6038 UniProtKB=Q12906  | Interleukin enhancer-binding factor 3;ILF3;ortholog                   | RNA metabolism protein(PC00031)                              |
| HUMAN HGNC=10721 UniProtKB=P16109 | P-selectin;SELP;ortholog                                              |                                                              |
| HUMAN HGNC=7377 UniProtKB=Q9UJ68  | Mitochondrial peptide methionine sulfoxide reductase;MSRA;ortholog    | reductase(PC00198)                                           |
| HUMAN HGNC=16768 UniProtKB=O60391 | Glutamate receptor ionotropic, NMDA 3B;GRIN3B;ortholog                | transmembrane signal receptor(PC00197)                       |
| HUMAN HGNC=6169 UniProtKB=Q14624  | Inter-alpha-trypsin inhibitor heavy chain H4;ITIH4;ortholog           | protease inhibitor(PC00191)                                  |
| HUMAN HGNC=8043 UniProtKB=Q02818  | Nucleobindin-1;NUCB1;ortholog                                         | calmodulin-related(PC00061)                                  |
| HUMAN HGNC=30268 UniProtKB=Q96AX2 | Ras-related protein Rab-37;RAB37;ortholog                             |                                                              |
| HUMAN HGNC=6517 UniProtKB=P18428  | Lipopolysaccharide-binding protein;LBP;ortholog                       |                                                              |
| HUMAN HGNC=16695 UniProtKB=P51572 | B-cell receptor-associated protein 31;BCAP31;ortholog                 | membrane traffic protein(PC00150)                            |
| HUMAN HGNC=19409 UniProtKB=O43300 | Leucine-rich repeat transmembrane neuronal protein 2;LRRTM2;ortholog  |                                                              |

|                                   |                                                                                             |                                                      |
|-----------------------------------|---------------------------------------------------------------------------------------------|------------------------------------------------------|
| HUMAN HGNC=10363 UniProtKB=P18124 | 60S ribosomal protein L7;RPL7;ortholog                                                      | ribosomal protein(PC00202)                           |
| HUMAN HGNC=2532 UniProtKB=P08311  | Cathepsin G;CTSG;ortholog                                                                   | serine protease(PC00203)                             |
| HUMAN HGNC=30205 UniProtKB=Q9H7C9 | Mth938 domain-containing protein;AAMDC;ortholog                                             |                                                      |
| HUMAN HGNC=25473 UniProtKB=Q9P2N6 | KAT8 regulatory NSL complex subunit 3;KANSL3;ortholog                                       |                                                      |
| HUMAN HGNC=26555 UniProtKB=Q3SY00 | Testis-specific protein 10-interacting protein;TSGA10IP;ortholog                            |                                                      |
| HUMAN HGNC=26928 UniProtKB=Q9UKY7 | Protein CDV3 homolog;CDV3;ortholog                                                          |                                                      |
| HUMAN HGNC=17168 UniProtKB=Q9H2M9 | Rab3 GTPase-activating protein non-catalytic subunit;RAB3GAP2;ortholog                      | G-protein modulator(PC00022)                         |
| HUMAN HGNC=4472 UniProtKB=Q14330  | N-arachidonyl glycine receptor;GPR18;ortholog                                               | G-protein coupled receptor(PC00021)                  |
| HUMAN HGNC=7729 UniProtKB=Q15019  | Septin-2;SEPTIN2;ortholog                                                                   | cytoskeletal protein(PC00085)                        |
| HUMAN HGNC=14294 UniProtKB=Q9BYB0 | SH3 and multiple ankyrin repeat domains protein 3;SHANK3;ortholog                           |                                                      |
| HUMAN HGNC=30611 UniProtKB=Q8TCJ2 | Dolichyl-diphosphooligosaccharide--protein glycosyltransferase subunit STT3B;STT3B;ortholog | glycosyltransferase(PC00111)                         |
| HUMAN HGNC=16276 UniProtKB=Q9C035 | Tripartite motif-containing protein 5;TRIM5;ortholog                                        | ubiquitin-protein ligase(PC00234)                    |
| HUMAN HGNC=16051 UniProtKB=Q8TEW0 | Partitioning defective 3 homolog;PARD3;ortholog                                             |                                                      |
| HUMAN HGNC=6446 UniProtKB=P05787  | Keratin, type II cytoskeletal 8;KRT8;ortholog                                               |                                                      |
| HUMAN HGNC=2335 UniProtKB=Q2VPA4  | Complement component receptor 1-like protein;CR1L;ortholog                                  |                                                      |
| HUMAN HGNC=607 UniProtKB=P02654   | Apolipoprotein C-I;APOC1;ortholog                                                           | apolipoprotein(PC00052)                              |
| HUMAN HGNC=679 UniProtKB=P52566   | Rho GDP-dissociation inhibitor 2;ARHGDIB;ortholog                                           | G-protein modulator(PC00022)                         |
| HUMAN HGNC=4883 UniProtKB=P08603  | Complement factor H;CFH;ortholog                                                            |                                                      |
| HUMAN HGNC=5238 UniProtKB=P11021  | Endoplasmic reticulum chaperone BiP;HSPA5;ortholog                                          |                                                      |
| HUMAN HGNC=3069 UniProtKB=P51452  | Dual specificity protein phosphatase 3;DUSP3;ortholog                                       |                                                      |
| HUMAN HGNC=8761 UniProtKB=Q9BUL8  | Programmed cell death protein 10;PDCD10;ortholog                                            |                                                      |
| HUMAN HGNC=5240 UniProtKB=P48741  | Putative heat shock 70 kDa protein 7;HSPA7;ortholog                                         |                                                      |
| HUMAN HGNC=23688 UniProtKB=Q86UU0 | B-cell CLL/lymphoma 9-like protein;BCL9L;ortholog                                           |                                                      |
| HUMAN HGNC=25296 UniProtKB=Q8IYM0 | Protein FAM186B;FAM186B;ortholog                                                            |                                                      |
| HUMAN HGNC=18423 UniProtKB=O75140 | GATOR complex protein DEPDC5;DEPDC5;ortholog                                                | GTPase-activating protein(PC00257)                   |
| HUMAN HGNC=8765 UniProtKB=O75340  | Programmed cell death protein 6;PDCD6;ortholog                                              | actin or actin-binding cytoskeletal protein(PC00041) |

|                                      |                                                               |                                                      |
|--------------------------------------|---------------------------------------------------------------|------------------------------------------------------|
| HUMAN HGNC=17964 UniProtKB=Q8TC12    | Retinol dehydrogenase 11;RDH11;ortholog                       | dehydrogenase(PC00092)                               |
| HUMAN HGNC=4814 UniProtKB=O60229     | Kalirin;KALRN;ortholog                                        | guanyl-nucleotide exchange factor(PC00113)           |
| HUMAN HGNC=4374 UniProtKB=O60234     | Glia maturation factor gamma;GMFG;ortholog                    | intercellular signal molecule(PC00207)               |
| HUMAN HGNC=20625 UniProtKB=M0R2J8    | Doublecortin domain-containing protein 1;DCDC1;ortholog       |                                                      |
| HUMAN HGNC=18304 UniProtKB=Q14019    | Coactosin-like protein;COTL1;ortholog                         | non-motor actin binding protein(PC00165)             |
| HUMAN HGNC=33749 UniProtKB=Q52MB2    | Coiled-coil domain-containing protein 184;CCDC184;ortholog    |                                                      |
| HUMAN HGNC=7694 UniProtKB=O14561     | Acyl carrier protein, mitochondrial;NDUFAB1;ortholog          | transfer/carrier protein(PC00219)                    |
| HUMAN HGNC=5742 UniProtKB=A0A0C4DH72 | Immunoglobulin kappa variable 1-6;IGKV1-6;ortholog            | immunoglobulin(PC00123)                              |
| HUMAN HGNC=12410 UniProtKB=Q9NY65    | Tubulin alpha-8 chain;TUBA8;ortholog                          | tubulin(PC00228)                                     |
| HUMAN HGNC=25035 UniProtKB=Q5VVQ6    | Ubiquitin thioesterase OTU1;YOD1;ortholog                     | cysteine protease(PC00081)                           |
| HUMAN HGNC=6528 UniProtKB=P13796     | Plastin-2;LCP1;ortholog                                       | non-motor actin binding protein(PC00165)             |
| HUMAN HGNC=15582 UniProtKB=Q8WXI7    | Mucin-16;MUC16;ortholog                                       |                                                      |
| HUMAN HGNC=5890 UniProtKB=P01705     | Immunoglobulin lambda variable 2-23;IGLV2-23;ortholog         | immunoglobulin(PC00123)                              |
| HUMAN HGNC=1424 UniProtKB=P27708     | CAD protein;CAD;ortholog                                      | ligase(PC00142)                                      |
| HUMAN HGNC=21740 UniProtKB=Q6ZV73    | FYVE, RhoGEF and PH domain-containing protein 6;FGD6;ortholog | guanyl-nucleotide exchange factor(PC00113)           |
| HUMAN HGNC=30697 UniProtKB=Q8TB96    | T-cell immunomodulatory protein;ITFG1;ortholog                |                                                      |
| HUMAN HGNC=24636 UniProtKB=Q9UHB6    | LIM domain and actin-binding protein 1;LIMA1;ortholog         | actin or actin-binding cytoskeletal protein(PC00041) |
| HUMAN HGNC=24903 UniProtKB=Q9Y520    | Protein PRRC2C;PRRC2C;ortholog                                | RNA metabolism protein(PC00031)                      |
| HUMAN HGNC=9070 UniProtKB=P08567     | Pleckstrin;PLEK;ortholog                                      | cytoskeletal protein(PC00085)                        |
| HUMAN HGNC=1090 UniProtKB=Q03001     | Dystonin;DST;ortholog                                         | intermediate filament binding protein(PC00130)       |
| HUMAN HGNC=29007 UniProtKB=Q14CM0    | FERM and PDZ domain-containing protein 4;FRMPD4;ortholog      |                                                      |
| HUMAN HGNC=14452 UniProtKB=Q9NYG5    | Anaphase-promoting complex subunit 11;ANAPC11;ortholog        | ubiquitin-protein ligase(PC00234)                    |
| HUMAN HGNC=1247 UniProtKB=P09871     | Complement C1s subcomponent;C1S;ortholog                      | serine protease(PC00203)                             |
| HUMAN HGNC=5654 UniProtKB=P01825     | Immunoglobulin heavy variable 4-59;IGHV4-59;ortholog          | immunoglobulin(PC00123)                              |
| HUMAN HGNC=94 UniProtKB=Q9BWD1       | Acetyl-CoA acetyltransferase, cytosolic;ACAT2;ortholog        | acyltransferase(PC00042)                             |
| HUMAN HGNC=362 UniProtKB=P54819      | Adenylate kinase 2, mitochondrial;AK2;ortholog                | nucleotide kinase(PC00172)                           |



|                                   |                                                                       |                                                      |
|-----------------------------------|-----------------------------------------------------------------------|------------------------------------------------------|
| HUMAN HGNC=4458 UniProtKB=P06744  | Glucose-6-phosphate isomerase;GPI;ortholog                            | isomerase(PC00135)                                   |
| HUMAN HGNC=25316 UniProtKB=Q5VZ19 | Tudor domain-containing protein 10;TDRD10;ortholog                    | scaffold/adaptor protein(PC00226)                    |
| HUMAN HGNC=8898 UniProtKB=P07205  | Phosphoglycerate kinase 2;PGK2;ortholog                               | carbohydrate kinase(PC00065)                         |
| HUMAN HGNC=8533 UniProtKB=P51575  | P2X purinoceptor 1;P2RX1;ortholog                                     | ligand-gated ion channel(PC00141)                    |
| HUMAN HGNC=9112 UniProtKB=Q6P1K2  | Polyamine-modulated factor 1;PMF1;ortholog                            |                                                      |
| HUMAN HGNC=6317 UniProtKB=O43896  | Kinesin-like protein KIF1C;KIF1C;ortholog                             | microtubule binding motor protein(PC00156)           |
| HUMAN HGNC=12669 UniProtKB=P21796 | Voltage-dependent anion-selective channel protein 1;VDAC1;ortholog    | voltage-gated ion channel(PC00241)                   |
| HUMAN HGNC=5228 UniProtKB=P25686  | DnaJ homolog subfamily B member 2;DNAJB2;ortholog                     | chaperone(PC00072)                                   |
| HUMAN HGNC=14248 UniProtKB=Q96RN5 | Mediator of RNA polymerase II transcription subunit 15;MED15;ortholog |                                                      |
| HUMAN HGNC=6050 UniProtKB=P29218  | Inositol monophosphatase 1;IMPA1;ortholog                             | phosphatase(PC00181)                                 |
| HUMAN HGNC=17820 UniProtKB=Q9H0P0 | Cytosolic 5'-nucleotidase 3A;NT5C3A;ortholog                          | esterase(PC00097)                                    |
| HUMAN HGNC=2213 UniProtKB=P12111  | Collagen alpha-3(VI) chain;COL6A3;ortholog                            | extracellular matrix structural protein(PC00103)     |
| HUMAN HGNC=570 UniProtKB=P53677   | AP-3 complex subunit mu-2;AP3M2;ortholog                              | membrane traffic protein(PC00150)                    |
| HUMAN HGNC=237 UniProtKB=O43306   | Adenylate cyclase type 6;ADCY6;ortholog                               |                                                      |
| HUMAN HGNC=12475 UniProtKB=P62837 | Ubiquitin-conjugating enzyme E2 D2;UBE2D2;ortholog                    | ubiquitin-protein ligase(PC00234)                    |
| HUMAN HGNC=8052 UniProtKB=Q9UUK9  | ADP-sugar pyrophosphatase;NUDT5;ortholog                              | pyrophosphatase(PC00196)                             |
| HUMAN HGNC=9207 UniProtKB=Q9UFF9  | CCR4-NOT transcription complex subunit 8;CNOT8;ortholog               | mRNA polyadenylation factor(PC00146)                 |
| HUMAN HGNC=11957 UniProtKB=Q93074 | Mediator of RNA polymerase II transcription subunit 12;MED12;ortholog | general transcription factor(PC00259)                |
| HUMAN HGNC=7571 UniProtKB=Q9UKX3  | Myosin-13;MYH13;ortholog                                              |                                                      |
| HUMAN HGNC=4718 UniProtKB=P10412  | Histone H1.4;H1-4;ortholog                                            | histone(PC00118)                                     |
| HUMAN HGNC=3213 UniProtKB=P26641  | Elongation factor 1-gamma;EEF1G;ortholog                              |                                                      |
| HUMAN HGNC=7732 UniProtKB=Q15843  | NEDD8;NEDD8;ortholog                                                  |                                                      |
| HUMAN HGNC=12388 UniProtKB=Q16762 | Thiosulfate sulfurtransferase;TST;ortholog                            | transferase(PC00220)                                 |
| HUMAN HGNC=707 UniProtKB=P59998   | Actin-related protein 2/3 complex subunit 4;ARPC4;ortholog            | actin or actin-binding cytoskeletal protein(PC00041) |
| HUMAN HGNC=24293 UniProtKB=Q70JA7 | Chondroitin sulfate synthase 3;CHSY3;ortholog                         | glycosyltransferase(PC00111)                         |
| HUMAN HGNC=5910 UniProtKB=P01718  | Immunoglobulin lambda variable 3-27;IGLV3-27;ortholog                 | immunoglobulin(PC00123)                              |

|                                      |                                                                                |                                        |
|--------------------------------------|--------------------------------------------------------------------------------|----------------------------------------|
| HUMAN HGNC=10899 UniProtKB=P63208    | S-phase kinase-associated protein 1;SKP1;ortholog                              | ubiquitin-protein ligase(PC00234)      |
| HUMAN HGNC=7641 UniProtKB=P54920     | Alpha-soluble NSF attachment protein;NAPA;ortholog                             | membrane traffic protein(PC00150)      |
| HUMAN HGNC=9388 UniProtKB=P10644     | cAMP-dependent protein kinase type I-alpha regulatory subunit;PRKAR1A;ortholog | kinase modulator(PC00140)              |
| HUMAN HGNC=24634 UniProtKB=Q9UBC2    | Epidermal growth factor receptor substrate 15-like 1;EPS15L1;ortholog          | membrane traffic protein(PC00150)      |
| HUMAN HGNC=6561 UniProtKB=P09382     | Galectin-1;LGALS1;ortholog                                                     | extracellular matrix protein(PC00102)  |
| HUMAN HGNC=7590 UniProtKB=Q15746     | Myosin light chain kinase, smooth muscle;MYLK;ortholog                         |                                        |
| HUMAN HGNC=1628 UniProtKB=P08571     | Monocyte differentiation antigen CD14;CD14;ortholog                            | transmembrane signal receptor(PC00197) |
| HUMAN HGNC=38476 UniProtKB=B9A064    | Immunoglobulin lambda-like polypeptide 5;IGLL5;ortholog                        | immunoglobulin(PC00123)                |
| HUMAN HGNC=12010 UniProtKB=P09493    | Tropomyosin alpha-1 chain;TPM1;ortholog                                        | actin binding motor protein(PC00040)   |
| HUMAN HGNC=8510 UniProtKB=Q92882     | Osteoclast-stimulating factor 1;OSTF1;ortholog                                 |                                        |
| HUMAN HGNC=255 UniProtKB=P28332      | Alcohol dehydrogenase 6;ADH6;ortholog                                          | dehydrogenase(PC00092)                 |
| HUMAN HGNC=10582 UniProtKB=Q9Y5Y9    | Sodium channel protein type 10 subunit alpha;SCN10A;ortholog                   | voltage-gated ion channel(PC00241)     |
| HUMAN HGNC=5551 UniProtKB=A0A0C4DH33 | Immunoglobulin heavy variable 1-24;IGHV1-24;ortholog                           | immunoglobulin(PC00123)                |
| HUMAN HGNC=18039 UniProtKB=Q9UGL1    | Lysine-specific demethylase 5B;KDM5B;ortholog                                  | histone modifying enzyme(PC00261)      |
| HUMAN HGNC=6535 UniProtKB=P00338     | L-lactate dehydrogenase A chain;LDHA;ortholog                                  | dehydrogenase(PC00092)                 |
| HUMAN HGNC=4335 UniProtKB=P00367     | Glutamate dehydrogenase 1, mitochondrial;GLUD1;ortholog                        | dehydrogenase(PC00092)                 |
| HUMAN HGNC=16753 UniProtKB=P30041    | Peroxioredoxin-6;PRDX6;ortholog                                                | peroxidase(PC00180)                    |
| HUMAN HGNC=26586 UniProtKB=Q8N2A0    | Putative uncharacterized protein encoded by LINC00269;LINC00269;ortholog       |                                        |
| HUMAN HGNC=20771 UniProtKB=P68371    | Tubulin beta-4B chain;TUBB4B;ortholog                                          | tubulin(PC00228)                       |
| HUMAN HGNC=4800 UniProtKB=Q99714     | 3-hydroxyacyl-CoA dehydrogenase type-2;HSD17B10;ortholog                       | oxidoreductase(PC00176)                |
| HUMAN HGNC=19375 UniProtKB=Q9BV35    | Calcium-binding mitochondrial carrier protein SCaMC-3;SLC25A23;ortholog        | mitochondrial carrier protein(PC00158) |
| HUMAN HGNC=16089 UniProtKB=O15173    | Membrane-associated progesterone receptor component 2;PGRMC2;ortholog          | transmembrane signal receptor(PC00197) |
| HUMAN HGNC=600 UniProtKB=P02647      | Apolipoprotein A-I;APOA1;ortholog                                              | apolipoprotein(PC00052)                |
| HUMAN HGNC=12012 UniProtKB=P06753    | Tropomyosin alpha-3 chain;TPM3;ortholog                                        | actin binding motor protein(PC00040)   |
| HUMAN HGNC=11126 UniProtKB=P53814    | Smoothelin;SMTN;ortholog                                                       |                                        |
| HUMAN HGNC=23435 UniProtKB=Q8N4J0    | Carnosine N-methyltransferase;CARNMT1;ortholog                                 |                                        |
| HUMAN HGNC=4227 UniProtKB=P50395     | Rab GDP dissociation inhibitor beta;GDI2;ortholog                              | G-protein modulator(PC00022)           |

|                                   |                                                                                 |                                                      |
|-----------------------------------|---------------------------------------------------------------------------------|------------------------------------------------------|
| HUMAN HGNC=7223 UniProtKB=P25325  | 3-mercaptopyruvate sulfurtransferase;MPST;ortholog                              | transferase(PC00220)                                 |
| HUMAN HGNC=10497 UniProtKB=P31151 | Protein S100-A7;S100A7;ortholog                                                 | calmodulin-related(PC00061)                          |
| HUMAN HGNC=14265 UniProtKB=Q86UP0 | Cadherin-24;CDH24;ortholog                                                      | cadherin(PC00057)                                    |
| HUMAN HGNC=29125 UniProtKB=Q9UQ16 | Dynamin-3;DNM3;ortholog                                                         | membrane traffic protein(PC00150)                    |
| HUMAN HGNC=9767 UniProtKB=O00194  | Ras-related protein Rab-27B;RAB27B;ortholog                                     |                                                      |
| HUMAN HGNC=24723 UniProtKB=Q9H6R3 | Acyl-CoA synthetase short-chain family member 3, mitochondrial;ACSS3;ortholog   | ligase(PC00142)                                      |
| HUMAN HGNC=5554 UniProtKB=P01743  | Immunoglobulin heavy variable 1-46;IGHV1-46;ortholog                            | immunoglobulin(PC00123)                              |
| HUMAN HGNC=23397 UniProtKB=Q5T1M5 | FK506-binding protein 15;FKBP15;ortholog                                        |                                                      |
| HUMAN HGNC=29989 UniProtKB=Q86YP4 | Transcriptional repressor p66-alpha;GATAD2A;ortholog                            | DNA-binding transcription factor(PC00218)            |
| HUMAN HGNC=10378 UniProtKB=P52815 | 39S ribosomal protein L12, mitochondrial;MRPL12;ortholog                        | ribosomal protein(PC00202)                           |
| HUMAN HGNC=575 UniProtKB=Q9Y587   | AP-4 complex subunit sigma-1;AP4S1;ortholog                                     | vesicle coat protein(PC00235)                        |
| HUMAN HGNC=17150 UniProtKB=Q9Y2V2 | Calcium-regulated heat-stable protein 1;CARHSP1;ortholog                        | RNA metabolism protein(PC00031)                      |
| HUMAN HGNC=544 UniProtKB=P08133   | Annexin A6;ANXA6;ortholog                                                       | calcium-binding protein(PC00060)                     |
| HUMAN HGNC=12016 UniProtKB=P29144 | Tripeptidyl-peptidase 2;TPP2;ortholog                                           | serine protease(PC00203)                             |
| HUMAN HGNC=17943 UniProtKB=Q9GZP9 | Derlin-2;DERL2;ortholog                                                         | primary active transporter(PC00068)                  |
| HUMAN HGNC=8078 UniProtKB=O95158  | Neurexophilin-4;NXPH4;ortholog                                                  | intercellular signal molecule(PC00207)               |
| HUMAN HGNC=9645 UniProtKB=Q05209  | Tyrosine-protein phosphatase non-receptor type 12;PTPN12;ortholog               |                                                      |
| HUMAN HGNC=10569 UniProtKB=P29508 | Serpin B3;SERPINB3;ortholog                                                     | protease inhibitor(PC00191)                          |
| HUMAN HGNC=1339 UniProtKB=P13671  | Complement component C6;C6;ortholog                                             |                                                      |
| HUMAN HGNC=12011 UniProtKB=P07951 | Tropomyosin beta chain;TPM2;ortholog                                            | actin binding motor protein(PC00040)                 |
| HUMAN HGNC=11767 UniProtKB=O43294 | Transforming growth factor beta-1-induced transcript 1 protein;TGFB1I1;ortholog | actin or actin-binding cytoskeletal protein(PC00041) |
| HUMAN HGNC=9087 UniProtKB=Q04941  | Proteolipid protein 2;PLP2;ortholog                                             | membrane traffic protein(PC00150)                    |
| HUMAN HGNC=3419 UniProtKB=P42566  | Epidermal growth factor receptor substrate 15;EPS15;ortholog                    | membrane traffic protein(PC00150)                    |
| HUMAN HGNC=4432 UniProtKB=P17174  | Aspartate aminotransferase, cytoplasmic;GOT1;ortholog                           | transaminase(PC00216)                                |
| HUMAN HGNC=2475 UniProtKB=P01034  | Cystatin-C;CST3;ortholog                                                        |                                                      |
| HUMAN HGNC=6707 UniProtKB=P33241  | Lymphocyte-specific protein 1;LSP1;ortholog                                     | non-motor actin binding protein(PC00165)             |

|                                      |                                                                          |                                                      |
|--------------------------------------|--------------------------------------------------------------------------|------------------------------------------------------|
| HUMAN HGNC=6484 UniProtKB=Q16363     | Laminin subunit alpha-4;LAMA4;ortholog                                   |                                                      |
| HUMAN HGNC=9451 UniProtKB=P04070     | Vitamin K-dependent protein C;PROC;ortholog                              | serine protease(PC00203)                             |
| HUMAN HGNC=18399 UniProtKB=Q8N5I4    | Dehydrogenase/reductase SDR family member on chromosome X;DHRSX;ortholog | dehydrogenase(PC00092)                               |
| HUMAN HGNC=26922 UniProtKB=Q5T890    | DNA excision repair protein ERCC-6-like 2;ERCC6L2;ortholog               |                                                      |
| HUMAN HGNC=24932 UniProtKB=Q9NZ63    | Telomere length and silencing protein 1 homolog;C9orf78;ortholog         |                                                      |
| HUMAN HGNC=850 UniProtKB=P48047      | ATP synthase subunit O, mitochondrial;ATP5PO;ortholog                    | ATP synthase(PC00002)                                |
| HUMAN HGNC=15606 UniProtKB=Q9UHA4    | Ragulator complex protein LAMTOR3;LAMTOR3;ortholog                       | scaffold/adaptor protein(PC00226)                    |
| HUMAN HGNC=21874 UniProtKB=Q96ME1    | F-box/LRR-repeat protein 18;FBXL18;ortholog                              |                                                      |
| HUMAN HGNC=16701 UniProtKB=P19105    | Myosin regulatory light chain 12A;MYL12A;ortholog                        | actin or actin-binding cytoskeletal protein(PC00041) |
| HUMAN HGNC=14959 UniProtKB=Q96T37    | RNA-binding protein 15;RBM15;ortholog                                    | RNA metabolism protein(PC00031)                      |
| HUMAN HGNC=9786 UniProtKB=P20340     | Ras-related protein Rab-6A;RAB6A;ortholog                                |                                                      |
| HUMAN HGNC=711 UniProtKB=P49407      | Beta-arrestin-1;ARRB1;ortholog                                           | scaffold/adaptor protein(PC00226)                    |
| HUMAN HGNC=18368 UniProtKB=Q9UM07    | Protein-arginine deiminase type-4;PADI4;ortholog                         |                                                      |
| HUMAN HGNC=26531 UniProtKB=Q96M89    | Coiled-coil domain-containing protein 138;CCDC138;ortholog               |                                                      |
| HUMAN HGNC=5239 UniProtKB=P17066     | Heat shock 70 kDa protein 6;HSPA6;ortholog                               |                                                      |
| HUMAN HGNC=6724 UniProtKB=P51884     | Lumican;LUM;ortholog                                                     |                                                      |
| HUMAN HGNC=673 UniProtKB=Q07960      | Rho GTPase-activating protein 1;ARHGAP1;ortholog                         | GTPase-activating protein(PC00257)                   |
| HUMAN HGNC=11326 UniProtKB=P51571    | Translocon-associated protein subunit delta;SSR4;ortholog                |                                                      |
| HUMAN HGNC=6171 UniProtKB=Q08881     | Tyrosine-protein kinase ITK/TSK;ITK;ortholog                             |                                                      |
| HUMAN HGNC=25708 UniProtKB=Q96JM4    | Leucine-rich repeat and IQ domain-containing protein 1;LRRIQ1;ortholog   |                                                      |
| HUMAN HGNC=12582 UniProtKB=P14927    | Cytochrome b-c1 complex subunit 7;UQCRB;ortholog                         | reductase(PC00198)                                   |
| HUMAN HGNC=11133 UniProtKB=O95721    | Synaptosomal-associated protein 29;SNAP29;ortholog                       | SNARE protein(PC00034)                               |
| HUMAN HGNC=5933 UniProtKB=A0A0B4J1Y8 | Immunoglobulin lambda variable 9-49;IGLV9-49;ortholog                    | immunoglobulin(PC00123)                              |
| HUMAN HGNC=10632 UniProtKB=P13501    | C-C motif chemokine 5;CCL5;ortholog                                      | cytokine(PC00083)                                    |
| HUMAN HGNC=29262 UniProtKB=Q9P2H3    | Intraflagellar transport protein 80 homolog;IFT80;ortholog               |                                                      |
| HUMAN HGNC=704 UniProtKB=O15143      | Actin-related protein 2/3 complex subunit 1B;ARPC1B;ortholog             | actin or actin-binding cytoskeletal protein(PC00041) |

|                                   |                                                                                              |                                                       |
|-----------------------------------|----------------------------------------------------------------------------------------------|-------------------------------------------------------|
| HUMAN HGNC=7821 UniProtKB=P14543  | Nidogen-1;NID1;ortholog                                                                      | transmembrane signal receptor(PC00197)                |
| HUMAN HGNC=3189 UniProtKB=P68104  | Elongation factor 1-alpha 1;EEF1A1;ortholog                                                  | translation factor(PC00223)                           |
| HUMAN HGNC=9414 UniProtKB=Q13976  | cGMP-dependent protein kinase 1;PRKG1;ortholog                                               | non-receptor serine/threonine protein kinase(PC00167) |
| HUMAN HGNC=4801 UniProtKB=P40939  | Trifunctional enzyme subunit alpha, mitochondrial;HADHA;ortholog                             |                                                       |
| HUMAN HGNC=9395 UniProtKB=P05771  | Protein kinase C beta type;PRKCB;ortholog                                                    | non-receptor serine/threonine protein kinase(PC00167) |
| HUMAN HGNC=11088 UniProtKB=Q9H2G2 | STE20-like serine/threonine-protein kinase;SLK;ortholog                                      |                                                       |
| HUMAN HGNC=10989 UniProtKB=Q00325 | Phosphate carrier protein, mitochondrial;SLC25A3;ortholog                                    | mitochondrial carrier protein(PC00158)                |
| HUMAN HGNC=11403 UniProtKB=Q9Y6E0 | Serine/threonine-protein kinase 24;STK24;ortholog                                            |                                                       |
| HUMAN HGNC=25516 UniProtKB=Q8TER5 | Rho guanine nucleotide exchange factor 40;ARHGEF40;ortholog                                  | guanyl-nucleotide exchange factor(PC00113)            |
| HUMAN HGNC=2728 UniProtKB=P39656  | Dolichyl-diphosphooligosaccharide--protein glycosyltransferase 48 kDa subunit;DDOST;ortholog | glycosyltransferase(PC00111)                          |
| HUMAN HGNC=9299 UniProtKB=P67775  | Serine/threonine-protein phosphatase 2A catalytic subunit alpha isoform;PPP2CA;ortholog      | protein phosphatase(PC00195)                          |
| HUMAN HGNC=11357 UniProtKB=Q92783 | Signal transducing adapter molecule 1;STAM;ortholog                                          | scaffold/adaptor protein(PC00226)                     |
| HUMAN HGNC=21230 UniProtKB=Q9P1F3 | Costars family protein ABRACL;ABRACL;ortholog                                                |                                                       |
| HUMAN HGNC=11099 UniProtKB=Q14527 | Helicase-like transcription factor;HLTF;ortholog                                             |                                                       |
| HUMAN HGNC=3382 UniProtKB=Q08495  | Dematin;DMTN;ortholog                                                                        | actin or actin-binding cytoskeletal protein(PC00041)  |
| HUMAN HGNC=13921 UniProtKB=O95870 | Phosphatidylserine lipase ABHD16A;ABHD16A;ortholog                                           | serine protease(PC00203)                              |
| HUMAN HGNC=1507 UniProtKB=P55212  | Caspase-6;CASP6;ortholog                                                                     | protease(PC00190)                                     |
| HUMAN HGNC=8044 UniProtKB=P80303  | Nucleobindin-2;NUCB2;ortholog                                                                | calmodulin-related(PC00061)                           |
| HUMAN HGNC=43788 UniProtKB=Q8NHM4 | Putative trypsin-6;PRSS3P2;ortholog                                                          | serine protease(PC00203)                              |
| HUMAN HGNC=16721 UniProtKB=A6NKQ9 | Choriogonadotropin subunit beta variant 1;CGB1;ortholog                                      | peptide hormone(PC00179)                              |
| HUMAN HGNC=6834 UniProtKB=P27338  | Amine oxidase [flavin-containing] B;MAOB;ortholog                                            | oxidase(PC00175)                                      |
| HUMAN HGNC=16499 UniProtKB=Q96DA2 | Ras-related protein Rab-39B;RAB39B;ortholog                                                  |                                                       |
| HUMAN HGNC=20471 UniProtKB=O95777 | U6 snRNA-associated Sm-like protein LSM8;LSM8;ortholog                                       | RNA splicing factor(PC00148)                          |
| HUMAN HGNC=10498 UniProtKB=P05109 | Protein S100-A8;S100A8;ortholog                                                              | calmodulin-related(PC00061)                           |
| HUMAN HGNC=20908 UniProtKB=Q86YF9 | Zinc finger protein DZIP1;DZIP1;ortholog                                                     |                                                       |

|                                   |                                                                     |                                                       |
|-----------------------------------|---------------------------------------------------------------------|-------------------------------------------------------|
| HUMAN HGNC=4827 UniProtKB=P68871  | Hemoglobin subunit beta;HBB;ortholog                                |                                                       |
| HUMAN HGNC=22880 UniProtKB=Q96JG8 | Melanoma-associated antigen D4;MAGED4B;ortholog                     | scaffold/adaptor protein(PC00226)                     |
| HUMAN HGNC=8515 UniProtKB=Q9HC10  | Otoferlin;OTOF;ortholog                                             | membrane trafficking regulatory protein(PC00151)      |
| HUMAN HGNC=10458 UniProtKB=Q92681 | Regulatory solute carrier protein family 1 member 1;RSC1A1;ortholog | membrane trafficking regulatory protein(PC00151)      |
| HUMAN HGNC=1476 UniProtKB=P07384  | Calpain-1 catalytic subunit;CAPN1;ortholog                          | cysteine protease(PC00081)                            |
| HUMAN HGNC=30904 UniProtKB=O60763 | General vesicular transport factor p115;USO1;ortholog               | membrane traffic protein(PC00150)                     |
| HUMAN HGNC=4823 UniProtKB=P69905  | Hemoglobin subunit alpha;HBA2;ortholog                              |                                                       |
| HUMAN HGNC=3815 UniProtKB=Q12951  | Forkhead box protein I1;FOXI1;ortholog                              | winged helix/forkhead transcription factor(PC00246)   |
| HUMAN HGNC=7516 UniProtKB=Q9HC84  | Mucin-5B;MUC5B;ortholog                                             | extracellular matrix protein(PC00102)                 |
| HUMAN HGNC=4555 UniProtKB=P22352  | Glutathione peroxidase 3;GPX3;ortholog                              | peroxidase(PC00180)                                   |
| HUMAN HGNC=20473 UniProtKB=Q9BX63 | Fanconi anemia group J protein;BRIP1;ortholog                       | DNA helicase(PC00011)                                 |
| HUMAN HGNC=24728 UniProtKB=A2RTX5 | Threonine--tRNA ligase 2, cytoplasmic;TARS3;ortholog                | aminoacyl-tRNA synthetase(PC00047)                    |
| HUMAN HGNC=4635 UniProtKB=P21266  | Glutathione S-transferase Mu 3;GSTM3;ortholog                       | transferase(PC00220)                                  |
| HUMAN HGNC=18451 UniProtKB=Q8NI22 | Multiple coagulation factor deficiency protein 2;MCFD2;ortholog     | membrane traffic protein(PC00150)                     |
| HUMAN HGNC=4395 UniProtKB=P19086  | Guanine nucleotide-binding protein G(z) subunit alpha;GNAZ;ortholog | heterotrimeric G-protein(PC00117)                     |
| HUMAN HGNC=12403 UniProtKB=Q8WZ42 | Titin;TTN;ortholog                                                  |                                                       |
| HUMAN HGNC=5753 UniProtKB=P01593  | Immunoglobulin kappa variable 1D-33;IGKV1D-33;ortholog              | immunoglobulin(PC00123)                               |
| HUMAN HGNC=119 UniProtKB=Q15067   | Peroxisomal acyl-coenzyme A oxidase 1;ACOX1;ortholog                | oxidoreductase(PC00176)                               |
| HUMAN HGNC=12849 UniProtKB=P31946 | 14-3-3 protein beta/alpha;YWHAB;ortholog                            | scaffold/adaptor protein(PC00226)                     |
| HUMAN HGNC=10991 UniProtKB=P05141 | ADP/ATP translocase 2;SLC25A5;ortholog                              | transfer/carrier protein(PC00219)                     |
| HUMAN HGNC=5593 UniProtKB=P0DP02  | Immunoglobulin heavy variable 3-30-3;IGHV3-30-3;ortholog            | immunoglobulin(PC00123)                               |
| HUMAN HGNC=794 UniProtKB=P31939   | Bifunctional purine biosynthesis protein ATIC;ATIC;ortholog         |                                                       |
| HUMAN HGNC=6871 UniProtKB=P28482  | Mitogen-activated protein kinase 1;MAPK1;ortholog                   | non-receptor serine/threonine protein kinase(PC00167) |
| HUMAN HGNC=6752 UniProtKB=P20645  | Cation-dependent mannose-6-phosphate receptor;M6PR;ortholog         | membrane traffic protein(PC00150)                     |
| HUMAN HGNC=9261 UniProtKB=Q13356  | RING-type E3 ubiquitin-protein ligase PPIL2;PPIL2;ortholog          | chaperone(PC00072)                                    |

|                                   |                                                                  |                                                       |
|-----------------------------------|------------------------------------------------------------------|-------------------------------------------------------|
| HUMAN HGNC=25397 UniProtKB=Q6MZP7 | Protein lin-54 homolog;LIN54;ortholog                            |                                                       |
| HUMAN HGNC=6631 UniProtKB=P49257  | Protein ERGIC-53;LMAN1;ortholog                                  | membrane traffic protein(PC00150)                     |
| HUMAN HGNC=16524 UniProtKB=P61106 | Ras-related protein Rab-14;RAB14;ortholog                        |                                                       |
| HUMAN HGNC=5620 UniProtKB=P01780  | Immunoglobulin heavy variable 3-7;IGHV3-7;ortholog               | immunoglobulin(PC00123)                               |
| HUMAN HGNC=18449 UniProtKB=P28838 | Cytosol aminopeptidase;LAP3;ortholog                             | metalloprotease(PC00153)                              |
| HUMAN HGNC=25240 UniProtKB=Q4KMQ2 | Anoctamin-6;ANO6;ortholog                                        |                                                       |
| HUMAN HGNC=7002 UniProtKB=A6NDR6  | Putative homeobox protein Meis3-like 1;MEIS3P1;ortholog          | homeodomain transcription factor(PC00119)             |
| HUMAN HGNC=19692 UniProtKB=Q96F24 | Nuclear receptor-binding factor 2;NRBF2;ortholog                 | transcription cofactor(PC00217)                       |
| HUMAN HGNC=2713 UniProtKB=O75935  | Dynactin subunit 3;DCTN3;ortholog                                | microtubule binding motor protein(PC00156)            |
| HUMAN HGNC=14010 UniProtKB=Q8IWI9 | MAX gene-associated protein;MGA;ortholog                         | Rel homology transcription factor(PC00252)            |
| HUMAN HGNC=678 UniProtKB=P52565   | Rho GDP-dissociation inhibitor 1;ARHGDI1;ortholog                | G-protein modulator(PC00022)                          |
| HUMAN HGNC=21416 UniProtKB=Q92485 | Acid sphingomyelinase-like phosphodiesterase 3b;SMPDL3B;ortholog | phosphodiesterase(PC00185)                            |
| HUMAN HGNC=20653 UniProtKB=Q8IVB4 | Sodium/hydrogen exchanger 9;SLC9A9;ortholog                      | secondary carrier transporter(PC00258)                |
| HUMAN HGNC=3951 UniProtKB=Q16595  | Frataxin, mitochondrial;FXN;ortholog                             | transfer/carrier protein(PC00219)                     |
| HUMAN HGNC=13582 UniProtKB=Q9UK99 | F-box only protein 3;FBXO3;ortholog                              |                                                       |
| HUMAN HGNC=7133 UniProtKB=O14686  | Histone-lysine N-methyltransferase 2D;KMT2D;ortholog             |                                                       |
| HUMAN HGNC=2949 UniProtKB=Q8TD57  | Dynein heavy chain 3, axonemal;DNAH3;ortholog                    | microtubule binding motor protein(PC00156)            |
| HUMAN HGNC=12488 UniProtKB=P68036 | Ubiquitin-conjugating enzyme E2 L3;UBE2L3;ortholog               | ubiquitin-protein ligase(PC00234)                     |
| HUMAN HGNC=20851 UniProtKB=Q5TON5 | Formin-binding protein 1-like;FNBP1L;ortholog                    |                                                       |
| HUMAN HGNC=24731 UniProtKB=Q8NBF2 | NHL repeat-containing protein 2;NHLRC2;ortholog                  |                                                       |
| HUMAN HGNC=29943 UniProtKB=Q9NT68 | Teneurin-2;TENM2;ortholog                                        |                                                       |
| HUMAN HGNC=30410 UniProtKB=Q9BXA6 | Testis-specific serine/threonine-protein kinase 6;TSSK6;ortholog | non-receptor serine/threonine protein kinase(PC00167) |
| HUMAN HGNC=144 UniProtKB=P63261   | Actin, cytoplasmic 2;ACTG1;ortholog                              | actin and actin related protein(PC00039)              |
| HUMAN HGNC=9495 UniProtKB=P24158  | Myeloblastin;PRTN3;ortholog                                      | serine protease(PC00203)                              |
| HUMAN HGNC=3694 UniProtKB=P02679  | Fibrinogen gamma chain;FGG;ortholog                              | intercellular signal molecule(PC00207)                |
| HUMAN HGNC=537 UniProtKB=P07355   | Annexin A2;ANXA2;ortholog                                        | calcium-binding protein(PC00060)                      |

|                                   |                                                                                        |                                     |
|-----------------------------------|----------------------------------------------------------------------------------------|-------------------------------------|
| HUMAN HGNC=16219 UniProtKB=Q8TEA8 | D-aminoacyl-tRNA deacylase 1;DTD1;ortholog                                             | esterase(PC00097)                   |
| HUMAN HGNC=28512 UniProtKB=A6NEQ2 | Protein FAM181B;FAM181B;ortholog                                                       |                                     |
| HUMAN HGNC=24526 UniProtKB=Q6DD88 | Atlastin-3;ATL3;ortholog                                                               | heterotrimeric G-protein(PC00117)   |
| HUMAN HGNC=29051 UniProtKB=O75071 | EF-hand calcium-binding domain-containing protein 14;EFCAB14;ortholog                  |                                     |
| HUMAN HGNC=8648 UniProtKB=Q15366  | Poly(rC)-binding protein 2;PCBP2;ortholog                                              | RNA metabolism protein(PC00031)     |
| HUMAN HGNC=30013 UniProtKB=Q96PD5 | N-acetylmuramoyl-L-alanine amidase;PGLYRP2;ortholog                                    |                                     |
| HUMAN HGNC=5596 UniProtKB=P01772  | Immunoglobulin heavy variable 3-33;IGHV3-33;ortholog                                   | immunoglobulin(PC00123)             |
| HUMAN HGNC=25457 UniProtKB=Q8N3F0 | Maturin;MTURN;ortholog                                                                 |                                     |
| HUMAN HGNC=18756 UniProtKB=Q9BYZ6 | Rho-related BTB domain-containing protein 2;RHOBTB2;ortholog                           | small GTPase(PC00208)               |
| HUMAN HGNC=20731 UniProtKB=Q9HAV0 | Guanine nucleotide-binding protein subunit beta-4;GNB4;ortholog                        | heterotrimeric G-protein(PC00117)   |
| HUMAN HGNC=6442 UniProtKB=P13647  | Keratin, type II cytoskeletal 5;KRT5;ortholog                                          |                                     |
| HUMAN HGNC=9658 UniProtKB=P29350  | Tyrosine-protein phosphatase non-receptor type 6;PTPN6;ortholog                        | protein phosphatase(PC00195)        |
| HUMAN HGNC=4624 UniProtKB=P48637  | Glutathione synthetase;GSS;ortholog                                                    | ligase(PC00142)                     |
| HUMAN HGNC=9802 UniProtKB=P15153  | Ras-related C3 botulinum toxin substrate 2;RAC2;ortholog                               | small GTPase(PC00208)               |
| HUMAN HGNC=8942 UniProtKB=P48595  | Serpin B10;SERPINB10;ortholog                                                          | protease inhibitor(PC00191)         |
| HUMAN HGNC=22222 UniProtKB=Q9C0H2 | Protein tweety homolog 3;TTYH3;ortholog                                                | ion channel(PC00133)                |
| HUMAN HGNC=5895 UniProtKB=P01709  | Immunoglobulin lambda variable 2-8;IGLV2-8;ortholog                                    | immunoglobulin(PC00123)             |
| HUMAN HGNC=23192 UniProtKB=Q9H5L6 | DNA transposase THAP9;THAP9;ortholog                                                   |                                     |
| HUMAN HGNC=5382 UniProtKB=O75874  | Isocitrate dehydrogenase [NADP] cytoplasmic;IDH1;ortholog                              | dehydrogenase(PC00092)              |
| HUMAN HGNC=9300 UniProtKB=P62714  | Serine/threonine-protein phosphatase 2A catalytic subunit beta isoform;PPP2CB;ortholog | protein phosphatase(PC00195)        |
| HUMAN HGNC=6766 UniProtKB=Q8WVG6  | MAP kinase-activating death domain protein;MADD;ortholog                               |                                     |
| HUMAN HGNC=11179 UniProtKB=P00441 | Superoxide dismutase [Cu-Zn];SOD1;ortholog                                             | oxidoreductase(PC00176)             |
| HUMAN HGNC=18676 UniProtKB=Q86XP3 | ATP-dependent RNA helicase DDX42;DDX42;ortholog                                        |                                     |
| HUMAN HGNC=6616 UniProtKB=P48059  | LIM and senescent cell antigen-like-containing domain protein 1;LIMS1;ortholog         | cell junction protein(PC00070)      |
| HUMAN HGNC=21265 UniProtKB=Q9NZP8 | Complement C1r subcomponent-like protein;C1RL;ortholog                                 | serine protease(PC00203)            |
| HUMAN HGNC=11056 UniProtKB=P48067 | Sodium- and chloride-dependent glycine transporter 1;SLC6A9;ortholog                   | primary active transporter(PC00068) |
| HUMAN HGNC=5713 UniProtKB=P01591  | Immunoglobulin J chain;JCHAIN;ortholog                                                 | immunoglobulin(PC00123)             |



|                                   |                                                                          |                                                       |
|-----------------------------------|--------------------------------------------------------------------------|-------------------------------------------------------|
| HUMAN HGNC=12649 UniProtKB=O95292 | Vesicle-associated membrane protein-associated protein B/C;VAPB;ortholog | membrane trafficking regulatory protein(PC00151)      |
| HUMAN HGNC=16820 UniProtKB=Q14162 | Scavenger receptor class F member 1;SCARF1;ortholog                      | membrane traffic protein(PC00150)                     |
| HUMAN HGNC=652 UniProtKB=P84077   | ADP-ribosylation factor 1;ARF1;ortholog                                  | G-protein(PC00020)                                    |
| HUMAN HGNC=4553 UniProtKB=P07203  | Glutathione peroxidase 1;GPX1;ortholog                                   | peroxidase(PC00180)                                   |
| HUMAN HGNC=6447 UniProtKB=P35527  | Keratin, type I cytoskeletal 9;KRT9;ortholog                             |                                                       |
| HUMAN HGNC=18994 UniProtKB=Q8TDC3 | Serine/threonine-protein kinase BRSK1;BRSK1;ortholog                     | non-receptor serine/threonine protein kinase(PC00167) |
| HUMAN HGNC=615 UniProtKB=Q13790   | Apolipoprotein F;APOF;ortholog                                           | apolipoprotein(PC00052)                               |
| HUMAN HGNC=28984 UniProtKB=Q12768 | WASH complex subunit 5;WASHC5;ortholog                                   | membrane traffic protein(PC00150)                     |
| HUMAN HGNC=2479 UniProtKB=O76096  | Cystatin-F;CST7;ortholog                                                 |                                                       |
| HUMAN HGNC=15904 UniProtKB=Q9H8E8 | Cysteine-rich protein 2-binding protein;KAT14;ortholog                   |                                                       |
| HUMAN HGNC=5580 UniProtKB=P01762  | Immunoglobulin heavy variable 3-11;IGHV3-11;ortholog                     | immunoglobulin(PC00123)                               |
| HUMAN HGNC=3778 UniProtKB=P02751  | Fibronectin;FN1;ortholog                                                 | intercellular signal molecule(PC00207)                |
| HUMAN HGNC=29129 UniProtKB=O94919 | Endonuclease domain-containing 1 protein;ENDOD1;ortholog                 |                                                       |
