# Supplementary material for: Platelet-Rich Fibrin Increases BMP2 Expression in Oral Fibroblasts via Activation of TGF-β Signaling
Source: MDPI journal article supplement (doi:10.3390/ijms22157935), 2021-07-25
Supplement: s1 [file s1]

Table S2. List of the 1791 GO terms derived by PANTHER analysis system based on proteomics analysis.

| GO term | Gene ID                                                                                                                                                                                                                                                                                                                                                                                                                                                                                                                                                                                                                                                                                                                                                                                                                                                                                                                                                                                                                                                                                                                                                                                                                                                                                                                                                                                                                                                                                                                                                                                                                                                                                                                                                                                                                                                                                                                                                                                                                                                                                                                                                                                                                                                                                                                                                                                                                                                                                                                                                                                                                                                                                                                                          | Name           |
|---------|--------------------------------------------------------------------------------------------------------------------------------------------------------------------------------------------------------------------------------------------------------------------------------------------------------------------------------------------------------------------------------------------------------------------------------------------------------------------------------------------------------------------------------------------------------------------------------------------------------------------------------------------------------------------------------------------------------------------------------------------------------------------------------------------------------------------------------------------------------------------------------------------------------------------------------------------------------------------------------------------------------------------------------------------------------------------------------------------------------------------------------------------------------------------------------------------------------------------------------------------------------------------------------------------------------------------------------------------------------------------------------------------------------------------------------------------------------------------------------------------------------------------------------------------------------------------------------------------------------------------------------------------------------------------------------------------------------------------------------------------------------------------------------------------------------------------------------------------------------------------------------------------------------------------------------------------------------------------------------------------------------------------------------------------------------------------------------------------------------------------------------------------------------------------------------------------------------------------------------------------------------------------------------------------------------------------------------------------------------------------------------------------------------------------------------------------------------------------------------------------------------------------------------------------------------------------------------------------------------------------------------------------------------------------------------------------------------------------------------------------------|----------------|
| PC00123 | HUMAN HGNC=5575 UniProtKB=A0A0B4J1V2,HUMAN HGNC=5825 UniProtKB=A0A0C4DH25,HUMAN HGNC=5549 UniProtKB=A0A0C4DH31,HUMAN HGNC=5480 UniProtKB=P01880,HUMAN HGNC=5659 UniProtKB=A0A0C4DH38,HUMAN Gene=KV311_HUMAN UniProtKB=P04433,HUMAN HGNC=38476 UniProtKB=B9A064,HUMAN HGNC=5877 UniProtKB=P01703,HUMAN HGNC=5834 UniProtKB=P06312,HUMAN HGNC=5861 UniProtKB=A0M8Q6,HUMAN HGNC=5647 UniProtKB=A0A087WSY4,HUMAN HGNC=5606 UniProtKB=P01763,HUMAN HGNC=5759 UniProtKB=A0A087WSZ0,HUMAN HGNC=5576 UniProtKB=P01817,HUMAN HGNC=5541 UniProtKB=P01871,HUMAN HGNC=5585 UniProtKB=A0A0C4DH32,HUMAN HGNC=5897 UniProtKB=A0A075B6K4,HUMAN HGNC=5526 UniProtKB=P01859,HUMAN Ensembl=ENSG00000282639 UniProtKB=A0A0J9YX35,HUMAN HGNC=5739 UniProtKB=A0A075B6S9,HUMAN HGNC=5880 UniProtKB=P01700,HUMAN HGNC=5624 UniProtKB=A0A0B4J1X5,HUMAN HGNC=5905 UniProtKB=P80748,HUMAN HGNC=5896 UniProtKB=P01715,HUMAN HGNC=5580 UniProtKB=P01762,HUMAN HGNC=5633 UniProtKB=A0A075B7D8,HUMAN HGNC=5582 UniProtKB=A0A0B4J1V0,HUMAN HGNC=5478 UniProtKB=P01876,HUMAN HGNC=5652 UniProtKB=A0A075B6R2,HUMAN HGNC=5836 UniProtKB=A0A0C4DH24,HUMAN HGNC=5895 UniProtKB=P01709,HUMAN HGNC=5619 UniProtKB=A0A0C4DH42,HUMAN HGNC=5887 UniProtKB=P01706,HUMAN HGNC=5604 UniProtKB=A0A0B4J1X8,HUMAN HGNC=5662 UniProtKB=A0A0B4J1U7,HUMAN HGNC=5746 UniProtKB=P01611,HUMAN HGNC=5821 UniProtKB=A0A075B6H7,HUMAN HGNC=5713 UniProtKB=P01591,HUMAN HGNC=5857 UniProtKB=P0DOY3,HUMAN HGNC=5889 UniProtKB=A0A075B6J9,HUMAN HGNC=5610 UniProtKB=P01767,HUMAN Ensembl=ENSG00000282150 UniProtKB=A0A0J9YY99,HUMAN HGNC=5730 UniProtKB=A0A0C4DH73,HUMAN HGNC=5527 UniProtKB=P01860,HUMAN HGNC=5783 UniProtKB=A0A075B6P5,HUMAN HGNC=5753 UniProtKB=P01593,HUMAN HGNC=5879 UniProtKB=P01699,HUMAN HGNC=5800 UniProtKB=A0A075B6S2,HUMAN HGNC=5645 UniProtKB=A0A0C4DH34,HUMAN HGNC=5554 UniProtKB=P01743,HUMAN HGNC=5742 UniProtKB=A0A0C4DH72,HUMAN HGNC=5634 UniProtKB=A0A075B7F0,HUMAN HGNC=5816 UniProtKB=P01624,HUMAN HGNC=5910 UniProtKB=P01718,HUMAN HGNC=5931 UniProtKB=A0A075B6I0,HUMAN HGNC=5933 UniProtKB=A0A0B4J1Y8,HUMAN HGNC=5563 UniProtKB=A0A075B7D0,HUMAN HGNC=5856 UniProtKB=P0DOY2,HUMAN HGNC=5890 UniProtKB=P01705,HUMAN HGNC=5732 UniProtKB=P04430,HUMAN HGNC=5733 UniProtKB=P01599,HUMAN HGNC=5528 UniProtKB=P01861,HUMAN HGNC=5888 UniProtKB=P01704,HUMAN HGNC=5551 UniProtKB=A0A0C4DH33,HUMAN HGNC=5927 UniProtKB=P01721,HUMAN HGNC=5918 UniProtKB=A0A075B6K5,HUMAN HGNC=5657 UniProtKB=P0DP08,HUMAN HGNC=5781 UniProtKB=A0A0C4DH68,HUMAN HGNC=5930 UniProtKB=A0A075B6I9,HUMAN HGNC=5901 UniProtKB=A0A075B6K0,HUMAN HGNC=5743 UniProtKB=A0A0C4DH67,HUMAN Gene=HV309_HUMAN UniProtKB=P01782,HUMAN HGNC=5654 UniProtKB=P01825,HUMAN HGNC=5553 UniProtKB=A0A0A0MS14,HUMAN G | immunoglobulin |

|            |                                                                                                                                                                                                                                                                                                                                                                                                                                                                                                                                                                                                                                                                                                                                                                                                                                                                                                                                                                |                                                                                                   |
|------------|----------------------------------------------------------------------------------------------------------------------------------------------------------------------------------------------------------------------------------------------------------------------------------------------------------------------------------------------------------------------------------------------------------------------------------------------------------------------------------------------------------------------------------------------------------------------------------------------------------------------------------------------------------------------------------------------------------------------------------------------------------------------------------------------------------------------------------------------------------------------------------------------------------------------------------------------------------------|---------------------------------------------------------------------------------------------------|
|            | ene=HV108_HUMAN UniProtKB=P0DP01,HUMAN HGNC=5620 UniProtKB=P01780,HUMAN HGNC=5598 UniProtKB=A0A0C4DH35,HUMAN HGNC=5756 UniProtKB=P04432,HUMAN HGNC=5617 UniProtKB=A0A075B6Q5,HUMAN HGNC=5594 UniProtKB=P0DP03,HUMAN HGNC=5735 UniProtKB=A0A075B6S5,HUMAN HGNC=5655 UniProtKB=A0A0C4DH41,HUMAN HGNC=5636 UniProtKB=A0A075B7B8,HUMAN HGNC=5586 UniProtKB=A0A0B4J1V1,HUMAN HGNC=5581 UniProtKB=P01766,HUMAN HGNC=5622 UniProtKB=A0A0B4J1Y9,HUMAN HGNC=5785 UniProtKB=P06310,HUMAN HGNC=5593 UniProtKB=P0DP02,HUMAN HGNC=5479 UniProtKB=P01877,HUMAN HGNC=5596 UniProtKB=P01772,HUMAN HGNC=5898 UniProtKB=A0A075B6K2,HUMAN HGNC=5550 UniProtKB=P23083,HUMAN HGNC=5929 UniProtKB=P04211,HUMAN HGNC=5882 UniProtKB=P01701,HUMAN HGNC=5525 UniProtKB=P01857,HUMAN HGNC=5908 UniProtKB=P01717,HUMAN HGNC=5601 UniProtKB=A0A0C4DH36,HUMAN HGNC=5716 UniProtKB=P01834,HUMAN HGNC=5588 UniProtKB=P01764,HUMAN HGNC=5741 UniProtKB=P01602,HUMAN HGNC=5817 UniProtKB=P01619 |                                                                                                   |
| GO:0009396 | HUMAN HGNC=871 UniProtKB=Q9UII2<br>HUMAN HGNC=17780 UniProtKB=Q562R1,HUMAN HGNC=12347 UniProtKB=Q9Y4A5,HUMAN HGNC=10474 UniProtKB=Q9Y265,HUMAN HGNC=10475 UniProtKB=Q9Y230<br>HUMAN HGNC=12488 UniProtKB=P68036,HUMAN HGNC=12491 UniProtKB=P61081,HUMAN HGNC=12492 UniProtKB=P61088,HUMAN HGNC=11617 UniProtKB=Q15369,HUMAN HGNC=12476 UniProtKB=P61077,HUMAN HGNC=2552 UniProtKB=Q13617,HUMAN HGNC=12475 UniProtKB=P62837,HUMAN HGNC=2551 UniProtKB=Q13616,HUMAN HGNC=12494 UniProtKB=Q13404,HUMAN HGNC=17598 UniProtKB=Q9Y385                                                                                                                                                                                                                                                                                                                                                                                                                                | folic acid-containing compound biosynthetic process<br><br>NuA4 histone acetyltransferase complex |
| GO:0004842 |                                                                                                                                                                                                                                                                                                                                                                                                                                                                                                                                                                                                                                                                                                                                                                                                                                                                                                                                                                | ubiquitin-protein transferase activity regulation of protein-containing complex assembly          |
| GO:0043254 | HUMAN HGNC=7641 UniProtKB=P54920,HUMAN HGNC=10534 UniProtKB=Q9NR31<br>HUMAN HGNC=25758 UniProtKB=Q8TED0,HUMAN HGNC=2717 UniProtKB=Q16531                                                                                                                                                                                                                                                                                                                                                                                                                                                                                                                                                                                                                                                                                                                                                                                                                       | RNA processing factor                                                                             |
| PC00147    | HUMAN HGNC=9391 UniProtKB=P13861,HUMAN HGNC=9414 UniProtKB=Q13976,HUMAN HGNC=9406 UniProtKB=Q16513,HUMAN HGNC=9380 UniProtKB=P17612,HUMAN HGNC=12401 UniProtKB=P33981,HUMAN HGNC=30765 UniProtKB=Q9UKE5,HUMAN HGNC=9392 UniProtKB=P31323,HUMAN HGNC=9395 UniProtKB=P05771,HUMAN HGNC=18994 UniProtKB=Q8TDC3,HUMAN HGNC=10432 UniProtKB=P51812,HUMAN HGNC=1459 UniProtKB=Q14012,HUMAN HGNC=11408 UniProtKB=Q13043,HUMAN HGNC=30410 UniProtKB=Q9BXA6,HUMAN HGNC=7590 UniProtKB=Q15746,HUMAN HGNC=10252 UniProtKB=O75116,HUMAN HGNC=20292 UniProtKB=Q9Y376,HUMAN HGNC=19825 UniProtKB=Q6SA08,HUMAN HGNC=9381 UniProtKB=P22694,HUMAN HGNC=9386 UniProtKB=Q9UGJ0,HUMAN HGNC=1745 UniProtKB=O00311,HUMAN HGNC=1738 UniProtKB=Q9Y5S2<br>HUMAN HGNC=11834 UniProtKB=P29401,HUMAN HGNC=28959 UniProtKB=Q14008,HUMAN HGNC=8527 UniProtKB=P55809,HUMAN HGNC=12388 UniProtKB=Q16762,HUMAN HGNC=7223 UniProtKB=P25325                                                       | protein serine/threonine kinase activity                                                          |
| GO:0016740 |                                                                                                                                                                                                                                                                                                                                                                                                                                                                                                                                                                                                                                                                                                                                                                                                                                                                                                                                                                | transferase activity                                                                              |

|                                                      |                                                                                                                                                                                                                                                                                                                                                                                                                                                                                                                                                                                                                                                                                                                                                                                                                                                                                                                                                                                                                                                                                                                                                                                                                                                                                                                                                                                                                                                                                                                                                                                                                                                                                                                                                                                                                                                                                                                                                                                                                                                                                                                                                                                                                                                                                                                                                                                                                                                                                                                                                                                                                                                                                                                                                                                                                                                                                                                                                                                                                                                                                                                                                                                                                                                                                                                                                                                                                                                                                                                                                                                                                                                                                                                                                                                                                                                                                                                                                                                                                                                                                                                                                                                                                                                                                                                                                                                                                                                                                                                                                                                                                                                                                                                                                                                                                                                                                                                                                                                                                                                                                                                                                                                                                                                                                                                                                                                                                                                                                                                                                                                                                                                                                                                                                                                                                                                                                                                                                                                                                                                                                                                                                                                                                                                                                                                                                                                                                                                                                                                                                                                                                                                                                                                                                                                                                                                                                                                                                                                                                                                                                                                                                                                                                                                                                                                                                                                                                                                                                                                                                                                                                                                                                                                                                                                                                                                                                                                                                                                                                                                                                                                                                                                                                                                                                                                                                                                                                                                                                                                                                                                                                                                                                                                                                                                                                                                                                                                                                                                                                                                                                                                                                                                                                                                                                                                                                                                                                                                                                                                                                                                                                                                                                                                                                                                                                                                                                                                                                                                                                                                                                                                                                                                                                                                                                                                                                                                                                                                                                                                                                                                                                                                                                                                                                                                                                                                                                                                                                                                                                                                                                                                                                                                                                                                                                                                                                                                                                                                                                                                                                                                                                                                                                                                                                                                                                                                                                                                                                                                                                                                                                                                                                                                                                                                                                                                                                                                                                                                                                                                                                                                                                                                                                                                                                                                                                                                                                                                                                                                                                                                                                                                                                                                                                                                                                                                                                                                                                                                                                                                                                                                                                                                                                                                                                                                                                                                                                                                                                                                                                                                                                                                                                                                                                                                                                                                                                                                                                                                                                                                                                                                                                                                                                                                                                                                                                                                                                                                                                                                                                                                                                                                                                                                                                                                                                                                                                                                                                                                                                                                                                                                                                                                                                                                                                                                                                                                                                                                                                                                                                                                                                                                                                                                                                                                                                                                                                                                                                                                                                                                                                                                                                                                                                                                                                                                                                                                                                                                                                                                                                                                                                                                                                                                                                                                                                                                                                                                                                                                                                                                                                                                                                                                                                                                                                                                                                                                                                                                                                                                                                                                                                                                                                                                                                                                                                                                                                                                                                                                                                                                                     |                                                                                                                                                   |
|------------------------------------------------------|-------------------------------------------------------------------------------------------------------------------------------------------------------------------------------------------------------------------------------------------------------------------------------------------------------------------------------------------------------------------------------------------------------------------------------------------------------------------------------------------------------------------------------------------------------------------------------------------------------------------------------------------------------------------------------------------------------------------------------------------------------------------------------------------------------------------------------------------------------------------------------------------------------------------------------------------------------------------------------------------------------------------------------------------------------------------------------------------------------------------------------------------------------------------------------------------------------------------------------------------------------------------------------------------------------------------------------------------------------------------------------------------------------------------------------------------------------------------------------------------------------------------------------------------------------------------------------------------------------------------------------------------------------------------------------------------------------------------------------------------------------------------------------------------------------------------------------------------------------------------------------------------------------------------------------------------------------------------------------------------------------------------------------------------------------------------------------------------------------------------------------------------------------------------------------------------------------------------------------------------------------------------------------------------------------------------------------------------------------------------------------------------------------------------------------------------------------------------------------------------------------------------------------------------------------------------------------------------------------------------------------------------------------------------------------------------------------------------------------------------------------------------------------------------------------------------------------------------------------------------------------------------------------------------------------------------------------------------------------------------------------------------------------------------------------------------------------------------------------------------------------------------------------------------------------------------------------------------------------------------------------------------------------------------------------------------------------------------------------------------------------------------------------------------------------------------------------------------------------------------------------------------------------------------------------------------------------------------------------------------------------------------------------------------------------------------------------------------------------------------------------------------------------------------------------------------------------------------------------------------------------------------------------------------------------------------------------------------------------------------------------------------------------------------------------------------------------------------------------------------------------------------------------------------------------------------------------------------------------------------------------------------------------------------------------------------------------------------------------------------------------------------------------------------------------------------------------------------------------------------------------------------------------------------------------------------------------------------------------------------------------------------------------------------------------------------------------------------------------------------------------------------------------------------------------------------------------------------------------------------------------------------------------------------------------------------------------------------------------------------------------------------------------------------------------------------------------------------------------------------------------------------------------------------------------------------------------------------------------------------------------------------------------------------------------------------------------------------------------------------------------------------------------------------------------------------------------------------------------------------------------------------------------------------------------------------------------------------------------------------------------------------------------------------------------------------------------------------------------------------------------------------------------------------------------------------------------------------------------------------------------------------------------------------------------------------------------------------------------------------------------------------------------------------------------------------------------------------------------------------------------------------------------------------------------------------------------------------------------------------------------------------------------------------------------------------------------------------------------------------------------------------------------------------------------------------------------------------------------------------------------------------------------------------------------------------------------------------------------------------------------------------------------------------------------------------------------------------------------------------------------------------------------------------------------------------------------------------------------------------------------------------------------------------------------------------------------------------------------------------------------------------------------------------------------------------------------------------------------------------------------------------------------------------------------------------------------------------------------------------------------------------------------------------------------------------------------------------------------------------------------------------------------------------------------------------------------------------------------------------------------------------------------------------------------------------------------------------------------------------------------------------------------------------------------------------------------------------------------------------------------------------------------------------------------------------------------------------------------------------------------------------------------------------------------------------------------------------------------------------------------------------------------------------------------------------------------------------------------------------------------------------------------------------------------------------------------------------------------------------------------------------------------------------------------------------------------------------------------------------------------------------------------------------------------------------------------------------------------------------------------------------------------------------------------------------------------------------------------------------------------------------------------------------------------------------------------------------------------------------------------------------------------------------------------------------------------------------------------------------------------------------------------------------------------------------------------------------------------------------------------------------------------------------------------------------------------------------------------------------------------------------------------------------------------------------------------------------------------------------------------------------------------------------------------------------------------------------------------------------------------------------------------------------------------------------------------------------------------------------------------------------------------------------------------------------------------------------------------------------------------------------------------------------------------------------------------------------------------------------------------------------------------------------------------------------------------------------------------------------------------------------------------------------------------------------------------------------------------------------------------------------------------------------------------------------------------------------------------------------------------------------------------------------------------------------------------------------------------------------------------------------------------------------------------------------------------------------------------------------------------------------------------------------------------------------------------------------------------------------------------------------------------------------------------------------------------------------------------------------------------------------------------------------------------------------------------------------------------------------------------------------------------------------------------------------------------------------------------------------------------------------------------------------------------------------------------------------------------------------------------------------------------------------------------------------------------------------------------------------------------------------------------------------------------------------------------------------------------------------------------------------------------------------------------------------------------------------------------------------------------------------------------------------------------------------------------------------------------------------------------------------------------------------------------------------------------------------------------------------------------------------------------------------------------------------------------------------------------------------------------------------------------------------------------------------------------------------------------------------------------------------------------------------------------------------------------------------------------------------------------------------------------------------------------------------------------------------------------------------------------------------------------------------------------------------------------------------------------------------------------------------------------------------------------------------------------------------------------------------------------------------------------------------------------------------------------------------------------------------------------------------------------------------------------------------------------------------------------------------------------------------------------------------------------------------------------------------------------------------------------------------------------------------------------------------------------------------------------------------------------------------------------------------------------------------------------------------------------------------------------------------------------------------------------------------------------------------------------------------------------------------------------------------------------------------------------------------------------------------------------------------------------------------------------------------------------------------------------------------------------------------------------------------------------------------------------------------------------------------------------------------------------------------------------------------------------------------------------------------------------------------------------------------------------------------------------------------------------------------------------------------------------------------------------------------------------------------------------------------------------------------------------------------------------------------------------------------------------------------------------------------------------------------------------------------------------------------------------------------------------------------------------------------------------------------------------------------------------------------------------------------------------------------------------------------------------------------------------------------------------------------------------------------------------------------------------------------------------------------------------------------------------------------------------------------------------------------------------------------------------------------------------------------------------------------------------------------------------------------------------------------------------------------------------------------------------------------------------------------------------------------------------------------------------------------------------------------------------------------------------------------------------------------------------------------------------------------------------------------------------------------------------------------------------------------------------------------------------------------------------------------------------------------------------------------------------------------------------------------------------------------------------------------------------------------------------------------------------------------------------------------------------------------------------------------------------------------------------------------------------------------------------------------------------------------------------------------------------------------------------------------------------------------------------------------------------------------------------------------------------------------------------------------------------------------------------------------------------------------------------------------------------------------------------------------------------------------------------------------------------------------------------------------------------------------------------------------------------------------------------------------------------------------------------------------------------------------------------------------------------------------------------------------------------------------------------------------------------------------------------------------------------------------------------------------------------------------------------------------------------------------------------------------------------------------------------------------------------------------------------------------------------------------------------------------------------------------------------------------------------------------------------------------------------------------------------------------------------------------------------------------------------------------------------------------------------------------------------------------------------------------------------------------------------------------------------------------------------------------------------------------------------------------------------------------------------------------------------------------------------------------------------------------------------------------------------------------------------------------------------------------------------------------------------------------------------------------------------------------------------------------------------------------------------------------------------------------------------------------------------------------------------------------------------------------------------------------------------------------------------------------------------------------------------------------------------------------------------------------------------------------------------------------------------------------------------------------------------------------------------------------------------------------------------------------------------------------------------------------------------------------------------------------------------------------------------------------------------------------------------------------------------------------------------------------------------------------------------------------------------------------------------------|---------------------------------------------------------------------------------------------------------------------------------------------------|
|                                                      | HUMAN HGNC=8898 UniProtKB=P07205,HUMAN HGNC=2949 UniProtKB=Q8TD57,HUMAN HGNC=26555 UniProtKB=Q3SY00,HUMAN HGNC=20908 UniProtKB=Q86YF9,HUMAN HGNC=2952 UniProtKB=Q96JB1,HUMAN HGNC=19747 UniProtKB=Q86UK5,HUMAN HGNC=14906 UniProtKB=Q8N4C6,HUMAN HGNC=26664 UniProtKB=Q8N841,HUMAN HGNC=11119 UniProtKB=Q99835,HUMAN HGNC=17060 UniProtKB=Q92845                                                                                                                                                                                                                                                                                                                                                                                                                                                                                                                                                                                                                                                                                                                                                                                                                                                                                                                                                                                                                                                                                                                                                                                                                                                                                                                                                                                                                                                                                                                                                                                                                                                                                                                                                                                                                                                                                                                                                                                                                                                                                                                                                                                                                                                                                                                                                                                                                                                                                                                                                                                                                                                                                                                                                                                                                                                                                                                                                                                                                                                                                                                                                                                                                                                                                                                                                                                                                                                                                                                                                                                                                                                                                                                                                                                                                                                                                                                                                                                                                                                                                                                                                                                                                                                                                                                                                                                                                                                                                                                                                                                                                                                                                                                                                                                                                                                                                                                                                                                                                                                                                                                                                                                                                                                                                                                                                                                                                                                                                                                                                                                                                                                                                                                                                                                                                                                                                                                                                                                                                                                                                                                                                                                                                                                                                                                                                                                                                                                                                                                                                                                                                                                                                                                                                                                                                                                                                                                                                                                                                                                                                                                                                                                                                                                                                                                                                                                                                                                                                                                                                                                                                                                                                                                                                                                                                                                                                                                                                                                                                                                                                                                                                                                                                                                                                                                                                                                                                                                                                                                                                                                                                                                                                                                                                                                                                                                                                                                                                                                                                                                                                                                                                                                                                                                                                                                                                                                                                                                                                                                                                                                                                                                                                                                                                                                                                                                                                                                                                                                                                                                                                                                                                                                                                                                                                                                                                                                                                                                                                                                                                                                                                                                                                                                                                                                                                                                                                                                                                                                                                                                                                                                                                                                                                                                                                                                                                                                                                                                                                                                                                                                                                                                                                                                                                                                                                                                                                                                                                                                                                                                                                                                                                                                                                                                                                                                                                                                                                                                                                                                                                                                                                                                                                                                                                                                                                                                                                                                                                                                                                                                                                                                                                                                                                                                                                                                                                                                                                                                                                                                                                                                                                                                                                                                                                                                                                                                                                                                                                                                                                                                                                                                                                                                                                                                                                                                                                                                                                                                                                                                                                                                                                                                                                                                                                                                                                                                                                                                                                                                                                                                                                                                                                                                                                                                                                                                                                                                                                                                                                                                                                                                                                                                                                                                                                                                                                                                                                                                                                                                                                                                                                                                                                                                                                                                                                                                                                                                                                                                                                                                                                                                                                                                                                                                                                                                                                                                                                                                                                                                                                                                                                                                                                                                                                                                                                                                                                                                                                                                                                                                                                                                                                                                                                                                                                                                                                                                                                                                                                                                                                                                                                                                                                                                    | intraciliary transport particle                                                                                                                   |
| GO:0030990<br>GO:0007283                             | HUMAN HGNC=26951 UniProtKB=Q86YL5<br>HUMAN HGNC=5241 UniProtKB=P11142,HUMAN HGNC=5261 UniProtKB=P10809,HUMAN HGNC=5239 UniProtKB=P17066,HUMAN HGNC=5240 UniProtKB=P48741                                                                                                                                                                                                                                                                                                                                                                                                                                                                                                                                                                                                                                                                                                                                                                                                                                                                                                                                                                                                                                                                                                                                                                                                                                                                                                                                                                                                                                                                                                                                                                                                                                                                                                                                                                                                                                                                                                                                                                                                                                                                                                                                                                                                                                                                                                                                                                                                                                                                                                                                                                                                                                                                                                                                                                                                                                                                                                                                                                                                                                                                                                                                                                                                                                                                                                                                                                                                                                                                                                                                                                                                                                                                                                                                                                                                                                                                                                                                                                                                                                                                                                                                                                                                                                                                                                                                                                                                                                                                                                                                                                                                                                                                                                                                                                                                                                                                                                                                                                                                                                                                                                                                                                                                                                                                                                                                                                                                                                                                                                                                                                                                                                                                                                                                                                                                                                                                                                                                                                                                                                                                                                                                                                                                                                                                                                                                                                                                                                                                                                                                                                                                                                                                                                                                                                                                                                                                                                                                                                                                                                                                                                                                                                                                                                                                                                                                                                                                                                                                                                                                                                                                                                                                                                                                                                                                                                                                                                                                                                                                                                                                                                                                                                                                                                                                                                                                                                                                                                                                                                                                                                                                                                                                                                                                                                                                                                                                                                                                                                                                                                                                                                                                                                                                                                                                                                                                                                                                                                                                                                                                                                                                                                                                                                                                                                                                                                                                                                                                                                                                                                                                                                                                                                                                                                                                                                                                                                                                                                                                                                                                                                                                                                                                                                                                                                                                                                                                                                                                                                                                                                                                                                                                                                                                                                                                                                                                                                                                                                                                                                                                                                                                                                                                                                                                                                                                                                                                                                                                                                                                                                                                                                                                                                                                                                                                                                                                                                                                                                                                                                                                                                                                                                                                                                                                                                                                                                                                                                                                                                                                                                                                                                                                                                                                                                                                                                                                                                                                                                                                                                                                                                                                                                                                                                                                                                                                                                                                                                                                                                                                                                                                                                                                                                                                                                                                                                                                                                                                                                                                                                                                                                                                                                                                                                                                                                                                                                                                                                                                                                                                                                                                                                                                                                                                                                                                                                                                                                                                                                                                                                                                                                                                                                                                                                                                                                                                                                                                                                                                                                                                                                                                                                                                                                                                                                                                                                                                                                                                                                                                                                                                                                                                                                                                                                                                                                                                                                                                                                                                                                                                                                                                                                                                                                                                                                                                                                                                                                                                                                                                                                                                                                                                                                                                                                                                                                                                                                                                                                                                                                                                                                                                                                                                                                                                                                                                                                                                                            | spermatogenesis                                                                                                                                   |
| GO:0034620<br>GO:0032880                             | HUMAN HGNC=16276 UniProtKB=Q9C035                                                                                                                                                                                                                                                                                                                                                                                                                                                                                                                                                                                                                                                                                                                                                                                                                                                                                                                                                                                                                                                                                                                                                                                                                                                                                                                                                                                                                                                                                                                                                                                                                                                                                                                                                                                                                                                                                                                                                                                                                                                                                                                                                                                                                                                                                                                                                                                                                                                                                                                                                                                                                                                                                                                                                                                                                                                                                                                                                                                                                                                                                                                                                                                                                                                                                                                                                                                                                                                                                                                                                                                                                                                                                                                                                                                                                                                                                                                                                                                                                                                                                                                                                                                                                                                                                                                                                                                                                                                                                                                                                                                                                                                                                                                                                                                                                                                                                                                                                                                                                                                                                                                                                                                                                                                                                                                                                                                                                                                                                                                                                                                                                                                                                                                                                                                                                                                                                                                                                                                                                                                                                                                                                                                                                                                                                                                                                                                                                                                                                                                                                                                                                                                                                                                                                                                                                                                                                                                                                                                                                                                                                                                                                                                                                                                                                                                                                                                                                                                                                                                                                                                                                                                                                                                                                                                                                                                                                                                                                                                                                                                                                                                                                                                                                                                                                                                                                                                                                                                                                                                                                                                                                                                                                                                                                                                                                                                                                                                                                                                                                                                                                                                                                                                                                                                                                                                                                                                                                                                                                                                                                                                                                                                                                                                                                                                                                                                                                                                                                                                                                                                                                                                                                                                                                                                                                                                                                                                                                                                                                                                                                                                                                                                                                                                                                                                                                                                                                                                                                                                                                                                                                                                                                                                                                                                                                                                                                                                                                                                                                                                                                                                                                                                                                                                                                                                                                                                                                                                                                                                                                                                                                                                                                                                                                                                                                                                                                                                                                                                                                                                                                                                                                                                                                                                                                                                                                                                                                                                                                                                                                                                                                                                                                                                                                                                                                                                                                                                                                                                                                                                                                                                                                                                                                                                                                                                                                                                                                                                                                                                                                                                                                                                                                                                                                                                                                                                                                                                                                                                                                                                                                                                                                                                                                                                                                                                                                                                                                                                                                                                                                                                                                                                                                                                                                                                                                                                                                                                                                                                                                                                                                                                                                                                                                                                                                                                                                                                                                                                                                                                                                                                                                                                                                                                                                                                                                                                                                                                                                                                                                                                                                                                                                                                                                                                                                                                                                                                                                                                                                                                                                                                                                                                                                                                                                                                                                                                                                                                                                                                                                                                                                                                                                                                                                                                                                                                                                                                                                                                                                                                                                                                                                                                                                                                                                                                                                                                                                                                                                                                                                                   | cellular response to unfolded protein regulation of protein localization                                                                          |
| GO:0097192<br>GO:0018193<br>GO:0043542<br>GO:0097060 | HUMAN HGNC=992 UniProtKB=Q07817<br>HUMAN HGNC=9261 UniProtKB=Q13356,HUMAN HGNC=26664 UniProtKB=Q8N841<br>HUMAN HGNC=10499 UniProtKB=P06702,HUMAN HGNC=533 UniProtKB=P04083,HUMAN HGNC=7178 UniProtKB=Q13201<br>HUMAN HGNC=188 UniProtKB=O14672<br>HUMAN HGNC=6616 UniProtKB=P48059,HUMAN HGNC=3757 UniProtKB=O75955,HUMAN HGNC=3230 UniProtKB=Q9NYQ7,HUMAN HGNC=3048 UniProtKB=Q02413,HUMAN HGNC=11828 UniProtKB=Q9UDY2,HUMAN HGNC=15447 UniProtKB=Q9Y4G6,HUMAN HGNC=3231 UniProtKB=Q9HCU4,HUMAN HGNC=30377 UniProtKB=Q14160,HUMAN HGNC=23112 UniProtKB=Q8TDW7<br>HUMAN HGNC=18756 UniProtKB=Q9BYZ6,HUMAN HGNC=6111 UniProtKB=Q13576,HUMAN HGNC=9802 UniProtKB=P15153,HUMAN HGNC=9801 UniProtKB=P63000<br>HUMAN HGNC=118 UniProtKB=Q99798,HUMAN HGNC=117 UniProtKB=P21399                                                                                                                                                                                                                                                                                                                                                                                                                                                                                                                                                                                                                                                                                                                                                                                                                                                                                                                                                                                                                                                                                                                                                                                                                                                                                                                                                                                                                                                                                                                                                                                                                                                                                                                                                                                                                                                                                                                                                                                                                                                                                                                                                                                                                                                                                                                                                                                                                                                                                                                                                                                                                                                                                                                                                                                                                                                                                                                                                                                                                                                                                                                                                                                                                                                                                                                                                                                                                                                                                                                                                                                                                                                                                                                                                                                                                                                                                                                                                                                                                                                                                                                                                                                                                                                                                                                                                                                                                                                                                                                                                                                                                                                                                                                                                                                                                                                                                                                                                                                                                                                                                                                                                                                                                                                                                                                                                                                                                                                                                                                                                                                                                                                                                                                                                                                                                                                                                                                                                                                                                                                                                                                                                                                                                                                                                                                                                                                                                                                                                                                                                                                                                                                                                                                                                                                                                                                                                                                                                                                                                                                                                                                                                                                                                                                                                                                                                                                                                                                                                                                                                                                                                                                                                                                                                                                                                                                                                                                                                                                                                                                                                                                                                                                                                                                                                                                                                                                                                                                                                                                                                                                                                                                                                                                                                                                                                                                                                                                                                                                                                                                                                                                                                                                                                                                                                                                                                                                                                                                                                                                                                                                                                                                                                                                                                                                                                                                                                                                                                                                                                                                                                                                                                                                                                                                                                                                                                                                                                                                                                                                                                                                                                                                                                                                                                                                                                                                                                                                                                                                                                                                                                                                                                                                                                                                                                                                                                                                                                                                                                                                                                                                                                                                                                                                                                                                                                                                                                                                                                                                                                                                                                                                                                                                                                                                                                                                                                                                                                                                                                                                                                                                                                                                                                                                                                                                                                                                                                                                                                                                                                                                                                                                                                                                                                                                                                                                                                                                                                                                                                                                                                                                                                                                                                                                                                                                                                                                                                                                                                                                                                                                                                                                                                                                                                                                                                                                                                                                                                                                                                                                                                                                                                                                                                                                                                                                                                                                                                                                                                                                                                                                                                                                                                                                                                                                                                                                                                                                                                                                                                                                                                                                                                                                                                                                                                                                                                                                                                                                                                                                                                                                                                                                                                                                                                                                                                                                                                                                                                                                                                                                                                                                                                                                                                                                                                                                                                                                                                                                                                                                                                                                                                                                                                                                                                                                                                                                                                                                                                                                                                                                                                                                                                                                                                                                                                           | extrinsic apoptotic signaling pathway in absence of ligand<br>peptidyl-amino acid modification<br>endothelial cell migration<br>synaptic membrane |
| GO:0098609<br>GO:0032956<br>GO:0051539               | HUMAN HGNC=18756 UniProtKB=Q9BYZ6,HUMAN HGNC=6111 UniProtKB=Q13576,HUMAN HGNC=9802 UniProtKB=P15153,HUMAN HGNC=9801 UniProtKB=P63000<br>HUMAN HGNC=118 UniProtKB=Q99798,HUMAN HGNC=117 UniProtKB=P21399                                                                                                                                                                                                                                                                                                                                                                                                                                                                                                                                                                                                                                                                                                                                                                                                                                                                                                                                                                                                                                                                                                                                                                                                                                                                                                                                                                                                                                                                                                                                                                                                                                                                                                                                                                                                                                                                                                                                                                                                                                                                                                                                                                                                                                                                                                                                                                                                                                                                                                                                                                                                                                                                                                                                                                                                                                                                                                                                                                                                                                                                                                                                                                                                                                                                                                                                                                                                                                                                                                                                                                                                                                                                                                                                                                                                                                                                                                                                                                                                                                                                                                                                                                                                                                                                                                                                                                                                                                                                                                                                                                                                                                                                                                                                                                                                                                                                                                                                                                                                                                                                                                                                                                                                                                                                                                                                                                                                                                                                                                                                                                                                                                                                                                                                                                                                                                                                                                                                                                                                                                                                                                                                                                                                                                                                                                                                                                                                                                                                                                                                                                                                                                                                                                                                                                                                                                                                                                                                                                                                                                                                                                                                                                                                                                                                                                                                                                                                                                                                                                                                                                                                                                                                                                                                                                                                                                                                                                                                                                                                                                                                                                                                                                                                                                                                                                                                                                                                                                                                                                                                                                                                                                                                                                                                                                                                                                                                                                                                                                                                                                                                                                                                                                                                                                                                                                                                                                                                                                                                                                                                                                                                                                                                                                                                                                                                                                                                                                                                                                                                                                                                                                                                                                                                                                                                                                                                                                                                                                                                                                                                                                                                                                                                                                                                                                                                                                                                                                                                                                                                                                                                                                                                                                                                                                                                                                                                                                                                                                                                                                                                                                                                                                                                                                                                                                                                                                                                                                                                                                                                                                                                                                                                                                                                                                                                                                                                                                                                                                                                                                                                                                                                                                                                                                                                                                                                                                                                                                                                                                                                                                                                                                                                                                                                                                                                                                                                                                                                                                                                                                                                                                                                                                                                                                                                                                                                                                                                                                                                                                                                                                                                                                                                                                                                                                                                                                                                                                                                                                                                                                                                                                                                                                                                                                                                                                                                                                                                                                                                                                                                                                                                                                                                                                                                                                                                                                                                                                                                                                                                                                                                                                                                                                                                                                                                                                                                                                                                                                                                                                                                                                                                                                                                                                                                                                                                                                                                                                                                                                                                                                                                                                                                                                                                                                                                                                                                                                                                                                                                                                                                                                                                                                                                                                                                                                                                                                                                                                                                                                                                                                                                                                                                                                                                                                                                                                                                                                                                                                                                                                                                                                                                                                                                                                                                                                                                                                                             | cell-cell adhesion                                                                                                                                |
| GO:0090263<br>GO:0008287<br>GO:0008175               | HUMAN HGNC=33704 UniProtKB=Q66K66,HUMAN HGNC=9275 UniProtKB=P35813<br>HUMAN HGNC=9302 UniProtKB=P30153,HUMAN HGNC=9308 UniProtKB=Q15257,HUMAN HGNC=9314 UniProtKB=Q08209,HUMAN HGNC=9304 UniProtKB=P63151<br>HUMAN HGNC=26022 UniProtKB=Q7L0Y3                                                                                                                                                                                                                                                                                                                                                                                                                                                                                                                                                                                                                                                                                                                                                                                                                                                                                                                                                                                                                                                                                                                                                                                                                                                                                                                                                                                                                                                                                                                                                                                                                                                                                                                                                                                                                                                                                                                                                                                                                                                                                                                                                                                                                                                                                                                                                                                                                                                                                                                                                                                                                                                                                                                                                                                                                                                                                                                                                                                                                                                                                                                                                                                                                                                                                                                                                                                                                                                                                                                                                                                                                                                                                                                                                                                                                                                                                                                                                                                                                                                                                                                                                                                                                                                                                                                                                                                                                                                                                                                                                                                                                                                                                                                                                                                                                                                                                                                                                                                                                                                                                                                                                                                                                                                                                                                                                                                                                                                                                                                                                                                                                                                                                                                                                                                                                                                                                                                                                                                                                                                                                                                                                                                                                                                                                                                                                                                                                                                                                                                                                                                                                                                                                                                                                                                                                                                                                                                                                                                                                                                                                                                                                                                                                                                                                                                                                                                                                                                                                                                                                                                                                                                                                                                                                                                                                                                                                                                                                                                                                                                                                                                                                                                                                                                                                                                                                                                                                                                                                                                                                                                                                                                                                                                                                                                                                                                                                                                                                                                                                                                                                                                                                                                                                                                                                                                                                                                                                                                                                                                                                                                                                                                                                                                                                                                                                                                                                                                                                                                                                                                                                                                                                                                                                                                                                                                                                                                                                                                                                                                                                                                                                                                                                                                                                                                                                                                                                                                                                                                                                                                                                                                                                                                                                                                                                                                                                                                                                                                                                                                                                                                                                                                                                                                                                                                                                                                                                                                                                                                                                                                                                                                                                                                                                                                                                                                                                                                                                                                                                                                                                                                                                                                                                                                                                                                                                                                                                                                                                                                                                                                                                                                                                                                                                                                                                                                                                                                                                                                                                                                                                                                                                                                                                                                                                                                                                                                                                                                                                                                                                                                                                                                                                                                                                                                                                                                                                                                                                                                                                                                                                                                                                                                                                                                                                                                                                                                                                                                                                                                                                                                                                                                                                                                                                                                                                                                                                                                                                                                                                                                                                                                                                                                                                                                                                                                                                                                                                                                                                                                                                                                                                                                                                                                                                                                                                                                                                                                                                                                                                                                                                                                                                                                                                                                                                                                                                                                                                                                                                                                                                                                                                                                                                                                                                                                                                                                                                                                                                                                                                                                                                                                                                                                                                                                                                                                                                                                                                                                                                                                                                                                                                                                                                                                                                                                                                      | regulation of actin cytoskeleton organization<br>4 iron, 4 sulfur cluster binding<br>positive regulation of canonical Wnt signaling pathway       |
| GO:0000712<br>GO:0006414                             | HUMAN HGNC=23845 UniProtKB=Q8IY92<br>HUMAN HGNC=10372 UniProtKB=P05386,HUMAN HGNC=3189 UniProtKB=P68104,HUMAN HGNC=20 UniProtKB=P49588,HUMAN HGNC=4162 UniProtKB=P41250,HUMAN HGNC=3213 UniProtKB=P26641,HUMAN HGNC=3200 UniProtKB=Q5VTE0,HUMAN HGNC=3282 UniProtKB=P60842,HUMAN HGNC=13759 UniProtKB=Q7L576,HUMAN HGNC=10404 UniProtKB=P15880,HUMAN HGNC=11572 UniProtKB=P26639,HUMAN HGNC=17894 UniProtKB=Q14966,HUMAN HGNC=9207 UniProtKB=Q9UFF9,HUMAN HGNC=4622 UniProtKB=Q8IYD1,HUMAN HGNC=1243 UniProtKB=Q07021,HUMAN HGNC=10372 UniProtKB=P05386,HUMAN HGNC=3189 UniProtKB=P68104,HUMAN HGNC=20 UniProtKB=P49588,HUMAN HGNC=4162 UniProtKB=P41250,HUMAN HGNC=3213 UniProtKB=P26641,HUMAN HGNC=3200 UniProtKB=Q5VTE0,HUMAN HGNC=3282 UniProtKB=P60842,HUMAN HGNC=13759 UniProtKB=Q7L576,HUMAN HGNC=10404 UniProtKB=P15880,HUMAN HGNC=11572 UniProtKB=P26639,HUMAN HGNC=17894 UniProtKB=Q14966,HUMAN HGNC=9207 UniProtKB=Q9UFF9,HUMAN HGNC=4622 UniProtKB=Q8IYD1,HUMAN HGNC=1243 UniProtKB=Q07021,HUMAN HGNC=10372 UniProtKB=P05386,HUMAN HGNC=3189 UniProtKB=P68104,HUMAN HGNC=20 UniProtKB=P49588,HUMAN HGNC=4162 UniProtKB=P41250,HUMAN HGNC=3213 UniProtKB=P26641,HUMAN HGNC=3200 UniProtKB=Q5VTE0,HUMAN HGNC=3282 UniProtKB=P60842,HUMAN HGNC=13759 UniProtKB=Q7L576,HUMAN HGNC=10404 UniProtKB=P15880,HUMAN HGNC=11572 UniProtKB=P26639,HUMAN HGNC=17894 UniProtKB=Q14966,HUMAN HGNC=9207 UniProtKB=Q9UFF9,HUMAN HGNC=4622 UniProtKB=Q8IYD1,HUMAN HGNC=1243 UniProtKB=Q07021,HUMAN HGNC=10372 UniProtKB=P05386,HUMAN HGNC=3189 UniProtKB=P68104,HUMAN HGNC=20 UniProtKB=P49588,HUMAN HGNC=4162 UniProtKB=P41250,HUMAN HGNC=3213 UniProtKB=P26641,HUMAN HGNC=3200 UniProtKB=Q5VTE0,HUMAN HGNC=3282 UniProtKB=P60842,HUMAN HGNC=13759 UniProtKB=Q7L576,HUMAN HGNC=10404 UniProtKB=P15880,HUMAN HGNC=11572 UniProtKB=P26639,HUMAN HGNC=17894 UniProtKB=Q14966,HUMAN HGNC=9207 UniProtKB=Q9UFF9,HUMAN HGNC=4622 UniProtKB=Q8IYD1,HUMAN HGNC=1243 UniProtKB=Q07021,HUMAN HGNC=10372 UniProtKB=P05386,HUMAN HGNC=3189 UniProtKB=P68104,HUMAN HGNC=20 UniProtKB=P49588,HUMAN HGNC=4162 UniProtKB=P41250,HUMAN HGNC=3213 UniProtKB=P26641,HUMAN HGNC=3200 UniProtKB=Q5VTE0,HUMAN HGNC=3282 UniProtKB=P60842,HUMAN HGNC=13759 UniProtKB=Q7L576,HUMAN HGNC=10404 UniProtKB=P15880,HUMAN HGNC=11572 UniProtKB=P26639,HUMAN HGNC=17894 UniProtKB=Q14966,HUMAN HGNC=9207 UniProtKB=Q9UFF9,HUMAN HGNC=4622 UniProtKB=Q8IYD1,HUMAN HGNC=1243 UniProtKB=Q07021,HUMAN HGNC=10372 UniProtKB=P05386,HUMAN HGNC=3189 UniProtKB=P68104,HUMAN HGNC=20 UniProtKB=P49588,HUMAN HGNC=4162 UniProtKB=P41250,HUMAN HGNC=3213 UniProtKB=P26641,HUMAN HGNC=3200 UniProtKB=Q5VTE0,HUMAN HGNC=3282 UniProtKB=P60842,HUMAN HGNC=13759 UniProtKB=Q7L576,HUMAN HGNC=10404 UniProtKB=P15880,HUMAN HGNC=11572 UniProtKB=P26639,HUMAN HGNC=17894 UniProtKB=Q14966,HUMAN HGNC=9207 UniProtKB=Q9UFF9,HUMAN HGNC=4622 UniProtKB=Q8IYD1,HUMAN HGNC=1243 UniProtKB=Q07021,HUMAN HGNC=10372 UniProtKB=P05386,HUMAN HGNC=3189 UniProtKB=P68104,HUMAN HGNC=20 UniProtKB=P49588,HUMAN HGNC=4162 UniProtKB=P41250,HUMAN HGNC=3213 UniProtKB=P26641,HUMAN HGNC=3200 UniProtKB=Q5VTE0,HUMAN HGNC=3282 UniProtKB=P60842,HUMAN HGNC=13759 UniProtKB=Q7L576,HUMAN HGNC=10404 UniProtKB=P15880,HUMAN HGNC=11572 UniProtKB=P26639,HUMAN HGNC=17894 UniProtKB=Q14966,HUMAN HGNC=9207 UniProtKB=Q9UFF9,HUMAN HGNC=4622 UniProtKB=Q8IYD1,HUMAN HGNC=1243 UniProtKB=Q07021,HUMAN HGNC=10372 UniProtKB=P05386,HUMAN HGNC=3189 UniProtKB=P68104,HUMAN HGNC=20 UniProtKB=P49588,HUMAN HGNC=4162 UniProtKB=P41250,HUMAN HGNC=3213 UniProtKB=P26641,HUMAN HGNC=3200 UniProtKB=Q5VTE0,HUMAN HGNC=3282 UniProtKB=P60842,HUMAN HGNC=13759 UniProtKB=Q7L576,HUMAN HGNC=10404 UniProtKB=P15880,HUMAN HGNC=11572 UniProtKB=P26639,HUMAN HGNC=17894 UniProtKB=Q14966,HUMAN HGNC=9207 UniProtKB=Q9UFF9,HUMAN HGNC=4622 UniProtKB=Q8IYD1,HUMAN HGNC=1243 UniProtKB=Q07021,HUMAN HGNC=10372 UniProtKB=P05386,HUMAN HGNC=3189 UniProtKB=P68104,HUMAN HGNC=20 UniProtKB=P49588,HUMAN HGNC=4162 UniProtKB=P41250,HUMAN HGNC=3213 UniProtKB=P26641,HUMAN HGNC=3200 UniProtKB=Q5VTE0,HUMAN HGNC=3282 UniProtKB=P60842,HUMAN HGNC=13759 UniProtKB=Q7L576,HUMAN HGNC=10404 UniProtKB=P15880,HUMAN HGNC=11572 UniProtKB=P26639,HUMAN HGNC=17894 UniProtKB=Q14966,HUMAN HGNC=9207 UniProtKB=Q9UFF9,HUMAN HGNC=4622 UniProtKB=Q8IYD1,HUMAN HGNC=1243 UniProtKB=Q07021,HUMAN HGNC=10372 UniProtKB=P05386,HUMAN HGNC=3189 UniProtKB=P68104,HUMAN HGNC=20 UniProtKB=P49588,HUMAN HGNC=4162 UniProtKB=P41250,HUMAN HGNC=3213 UniProtKB=P26641,HUMAN HGNC=3200 UniProtKB=Q5VTE0,HUMAN HGNC=3282 UniProtKB=P60842,HUMAN HGNC=13759 UniProtKB=Q7L576,HUMAN HGNC=10404 UniProtKB=P15880,HUMAN HGNC=11572 UniProtKB=P26639,HUMAN HGNC=17894 UniProtKB=Q14966,HUMAN HGNC=9207 UniProtKB=Q9UFF9,HUMAN HGNC=4622 UniProtKB=Q8IYD1,HUMAN HGNC=1243 UniProtKB=Q07021,HUMAN HGNC=10372 UniProtKB=P05386,HUMAN HGNC=3189 UniProtKB=P68104,HUMAN HGNC=20 UniProtKB=P49588,HUMAN HGNC=4162 UniProtKB=P41250,HUMAN HGNC=3213 UniProtKB=P26641,HUMAN HGNC=3200 UniProtKB=Q5VTE0,HUMAN HGNC=3282 UniProtKB=P60842,HUMAN HGNC=13759 UniProtKB=Q7L576,HUMAN HGNC=10404 UniProtKB=P15880,HUMAN HGNC=11572 UniProtKB=P26639,HUMAN HGNC=17894 UniProtKB=Q14966,HUMAN HGNC=9207 UniProtKB=Q9UFF9,HUMAN HGNC=4622 UniProtKB=Q8IYD1,HUMAN HGNC=1243 UniProtKB=Q07021,HUMAN HGNC=10372 UniProtKB=P05386,HUMAN HGNC=3189 UniProtKB=P68104,HUMAN HGNC=20 UniProtKB=P49588,HUMAN HGNC=4162 UniProtKB=P41250,HUMAN HGNC=3213 UniProtKB=P26641,HUMAN HGNC=3200 UniProtKB=Q5VTE0,HUMAN HGNC=3282 UniProtKB=P60842,HUMAN HGNC=13759 UniProtKB=Q7L576,HUMAN HGNC=10404 UniProtKB=P15880,HUMAN HGNC=11572 UniProtKB=P26639,HUMAN HGNC=17894 UniProtKB=Q14966,HUMAN HGNC=9207 UniProtKB=Q9UFF9,HUMAN HGNC=4622 UniProtKB=Q8IYD1,HUMAN HGNC=1243 UniProtKB=Q07021,HUMAN HGNC=10372 UniProtKB=P05386,HUMAN HGNC=3189 UniProtKB=P68104,HUMAN HGNC=20 UniProtKB=P49588,HUMAN HGNC=4162 UniProtKB=P41250,HUMAN HGNC=3213 UniProtKB=P26641,HUMAN HGNC=3200 UniProtKB=Q5VTE0,HUMAN HGNC=3282 UniProtKB=P60842,HUMAN HGNC=13759 UniProtKB=Q7L576,HUMAN HGNC=10404 UniProtKB=P15880,HUMAN HGNC=11572 UniProtKB=P26639,HUMAN HGNC=17894 UniProtKB=Q14966,HUMAN HGNC=9207 UniProtKB=Q9UFF9,HUMAN HGNC=4622 UniProtKB=Q8IYD1,HUMAN HGNC=1243 UniProtKB=Q07021,HUMAN HGNC=10372 UniProtKB=P05386,HUMAN HGNC=3189 UniProtKB=P68104,HUMAN HGNC=20 UniProtKB=P49588,HUMAN HGNC=4162 UniProtKB=P41250,HUMAN HGNC=3213 UniProtKB=P26641,HUMAN HGNC=3200 UniProtKB=Q5VTE0,HUMAN HGNC=3282 UniProtKB=P60842,HUMAN HGNC=13759 UniProtKB=Q7L576,HUMAN HGNC=10404 UniProtKB=P15880,HUMAN HGNC=11572 UniProtKB=P26639,HUMAN HGNC=17894 UniProtKB=Q14966,HUMAN HGNC=9207 UniProtKB=Q9UFF9,HUMAN HGNC=4622 UniProtKB=Q8IYD1,HUMAN HGNC=1243 UniProtKB=Q07021,HUMAN HGNC=10372 UniProtKB=P05386,HUMAN HGNC=3189 UniProtKB=P68104,HUMAN HGNC=20 UniProtKB=P49588,HUMAN HGNC=4162 UniProtKB=P41250,HUMAN HGNC=3213 UniProtKB=P26641,HUMAN HGNC=3200 UniProtKB=Q5VTE0,HUMAN HGNC=3282 UniProtKB=P60842,HUMAN HGNC=13759 UniProtKB=Q7L576,HUMAN HGNC=10404 UniProtKB=P15880,HUMAN HGNC=11572 UniProtKB=P26639,HUMAN HGNC=17894 UniProtKB=Q14966,HUMAN HGNC=9207 UniProtKB=Q9UFF9,HUMAN HGNC=4622 UniProtKB=Q8IYD1,HUMAN HGNC=1243 UniProtKB=Q07021,HUMAN HGNC=10372 UniProtKB=P05386,HUMAN HGNC=3189 UniProtKB=P68104,HUMAN HGNC=20 UniProtKB=P49588,HUMAN HGNC=4162 UniProtKB=P41250,HUMAN HGNC=3213 UniProtKB=P26641,HUMAN HGNC=3200 UniProtKB=Q5VTE0,HUMAN HGNC=3282 UniProtKB=P60842,HUMAN HGNC=13759 UniProtKB=Q7L576,HUMAN HGNC=10404 UniProtKB=P15880,HUMAN HGNC=11572 UniProtKB=P26639,HUMAN HGNC=17894 UniProtKB=Q14966,HUMAN HGNC=9207 UniProtKB=Q9UFF9,HUMAN HGNC=4622 UniProtKB=Q8IYD1,HUMAN HGNC=1243 UniProtKB=Q07021,HUMAN HGNC=10372 UniProtKB=P05386,HUMAN HGNC=3189 UniProtKB=P68104,HUMAN HGNC=20 UniProtKB=P49588,HUMAN HGNC=4162 UniProtKB=P41250,HUMAN HGNC=3213 UniProtKB=P26641,HUMAN HGNC=3200 UniProtKB=Q5VTE0,HUMAN HGNC=3282 UniProtKB=P60842,HUMAN HGNC=13759 UniProtKB=Q7L576,HUMAN HGNC=10404 UniProtKB=P15880,HUMAN HGNC=11572 UniProtKB=P26639,HUMAN HGNC=17894 UniProtKB=Q14966,HUMAN HGNC=9207 UniProtKB=Q9UFF9,HUMAN HGNC=4622 UniProtKB=Q8IYD1,HUMAN HGNC=1243 UniProtKB=Q07021,HUMAN HGNC=10372 UniProtKB=P05386,HUMAN HGNC=3189 UniProtKB=P68104,HUMAN HGNC=20 UniProtKB=P49588,HUMAN HGNC=4162 UniProtKB=P41250,HUMAN HGNC=3213 UniProtKB=P26641,HUMAN HGNC=3200 UniProtKB=Q5VTE0,HUMAN HGNC=3282 UniProtKB=P60842,HUMAN HGNC=13759 UniProtKB=Q7L576,HUMAN HGNC=10404 UniProtKB=P15880,HUMAN HGNC=11572 UniProtKB=P26639,HUMAN HGNC=17894 UniProtKB=Q14966,HUMAN HGNC=9207 UniProtKB=Q9UFF9,HUMAN HGNC=4622 UniProtKB=Q8IYD1,HUMAN HGNC=1243 UniProtKB=Q07021,HUMAN HGNC=10372 UniProtKB=P05386,HUMAN HGNC=3189 UniProtKB=P68104,HUMAN HGNC=20 UniProtKB=P49588,HUMAN HGNC=4162 UniProtKB=P41250,HUMAN HGNC=3213 UniProtKB=P26641,HUMAN HGNC=3200 UniProtKB=Q5VTE0,HUMAN HGNC=3282 UniProtKB=P60842,HUMAN HGNC=13759 UniProtKB=Q7L576,HUMAN HGNC=10404 UniProtKB=P15880,HUMAN HGNC=11572 UniProtKB=P26639,HUMAN HGNC=17894 UniProtKB=Q14966,HUMAN HGNC=9207 UniProtKB=Q9UFF9,HUMAN HGNC=4622 UniProtKB=Q8IYD1,HUMAN HGNC=1243 UniProtKB=Q07021,HUMAN HGNC=10372 UniProtKB=P05386,HUMAN HGNC=3189 UniProtKB=P68104,HUMAN HGNC=20 UniProtKB=P49588,HUMAN HGNC=4162 UniProtKB=P41250,HUMAN HGNC=3213 UniProtKB=P26641,HUMAN HGNC=3200 UniProtKB=Q5VTE0,HUMAN HGNC=3282 UniProtKB=P60842,HUMAN HGNC=13759 UniProtKB=Q7L576,HUMAN HGNC=10404 UniProtKB=P15880,HUMAN HGNC=11572 UniProtKB=P26639,HUMAN HGNC=17894 UniProtKB=Q14966,HUMAN HGNC=9207 UniProtKB=Q9UFF9,HUMAN HGNC=4622 UniProtKB=Q8IYD1,HUMAN HGNC=1243 UniProtKB=Q07021,HUMAN HGNC=10372 UniProtKB=P05386,HUMAN HGNC=3189 UniProtKB=P68104,HUMAN HGNC=20 UniProtKB=P49588,HUMAN HGNC=4162 UniProtKB=P41250,HUMAN HGNC=3213 UniProtKB=P26641,HUMAN HGNC=3200 UniProtKB=Q5VTE0,HUMAN HGNC=3282 UniProtKB=P60842,HUMAN HGNC=13759 UniProtKB=Q7L576,HUMAN HGNC=10404 UniProtKB=P15880,HUMAN HGNC=11572 UniProtKB=P26639,HUMAN HGNC=17894 UniProtKB=Q14966,HUMAN HGNC=9207 UniProtKB=Q9UFF9,HUMAN HGNC=4622 UniProtKB=Q8IYD1,HUMAN HGNC=1243 UniProtKB=Q07021,HUMAN HGNC=10372 UniProtKB=P05386,HUMAN HGNC=3189 UniProtKB=P68104,HUMAN HGNC=20 UniProtKB=P49588,HUMAN HGNC=4162 UniProtKB=P41250,HUMAN HGNC=3213 UniProtKB=P26641,HUMAN HGNC=3200 UniProtKB=Q5VTE0,HUMAN HGNC=3282 UniProtKB=P60842,HUMAN HGNC=13759 UniProtKB=Q7L576,HUMAN HGNC=10404 UniProtKB=P15880,HUMAN HGNC=11572 UniProtKB=P26639,HUMAN HGNC=17894 UniProtKB=Q14966,HUMAN HGNC=9207 UniProtKB=Q9UFF9,HUMAN HGNC=4622 UniProtKB=Q8IYD1,HUMAN HGNC=1243 UniProtKB=Q07021,HUMAN HGNC=10372 UniProtKB=P05386,HUMAN HGNC=3189 UniProtKB=P68104,HUMAN HGNC=20 UniProtKB=P49588,HUMAN HGNC=4162 UniProtKB=P41250,HUMAN HGNC=3213 UniProtKB=P26641,HUMAN HGNC=3200 UniProtKB=Q5VTE0,HUMAN HGNC=3282 UniProtKB=P60842,HUMAN HGNC=13759 UniProtKB=Q7L576,HUMAN HGNC=10404 UniProtKB=P15880,HUMAN HGNC=11572 UniProtKB=P26639,HUMAN HGNC=17894 UniProtKB=Q14966,HUMAN HGNC=9207 UniProtKB=Q9UFF9,HUMAN HGNC=4622 UniProtKB=Q8IYD1,HUMAN HGNC=1243 UniProtKB=Q07021,HUMAN HGNC=10372 UniProtKB=P05386,HUMAN HGNC=3189 UniProtKB=P68104,HUMAN HGNC=20 UniProtKB=P49588,HUMAN HGNC=4162 UniProtKB=P41250,HUMAN HGNC=3213 UniProtKB=P26641,HUMAN HGNC=3200 UniProtKB=Q5VTE0,HUMAN HGNC=3282 UniProtKB=P60842,HUMAN HGNC=13759 UniProtKB=Q7L576,HUMAN HGNC=10404 UniProtKB=P15880,HUMAN HGNC=11572 UniProtKB=P26639,HUMAN HGNC=17894 UniProtKB=Q14966,HUMAN HGNC=9207 UniProtKB=Q9UFF9,HUMAN HGNC=4622 UniProtKB=Q8IYD1,HUMAN HGNC=1243 UniProtKB=Q07021,HUMAN HGNC=10372 UniProtKB=P05386,HUMAN HGNC=3189 UniProtKB=P68104,HUMAN HGNC=20 UniProtKB=P49588,HUMAN HGNC=4162 UniProtKB=P41250,HUMAN HGNC=3213 UniProtKB=P26641,HUMAN HGNC=3200 UniProtKB=Q5VTE0,HUMAN HGNC=3282 UniProtKB=P60842,HUMAN HGNC=13759 UniProtKB=Q7L576,HUMAN HGNC=10404 UniProtKB=P15880,HUMAN HGNC=11572 UniProtKB=P26639,HUMAN HGNC=17894 UniProtKB=Q14966,HUMAN HGNC=9207 UniProtKB=Q9UFF9,HUMAN HGNC=4622 UniProtKB=Q8IYD1,HUMAN HGNC=1243 UniProtKB=Q07021,HUMAN HGNC=10372 UniProtKB=P05386,HUMAN HGNC=3189 UniProtKB=P68104,HUMAN HGNC=20 UniProtKB=P49588,HUMAN HGNC=4162 UniProtKB=P41250,HUMAN HGNC=3213 UniProtKB=P26641,HUMAN HGNC=3200 UniProtKB=Q5VTE0,HUMAN HGNC=3282 UniProtKB=P60842,HUMAN HGNC=13759 UniProtKB=Q7L576,HUMAN HGNC=10404 UniProtKB=P15880,HUMAN HGNC=11572 UniProtKB=P26639,HUMAN HGNC=17894 UniProtKB=Q14966,HUMAN HGNC=9207 UniProtKB=Q9UFF9,HUMAN HGNC=4622 UniProtKB=Q8IYD1,HUMAN HGNC=1243 UniProtKB=Q07021,HUMAN HGNC=10372 UniProtKB=P05386,HUMAN HGNC=3189 UniProtKB=P68104,HUMAN HGNC=20 UniProtKB=P49588,HUMAN HGNC=4162 UniProtKB=P41250,HUMAN HGNC=3213 UniProtKB=P26641,HUMAN HGNC=3200 UniProtKB=Q5VTE0,HUMAN HGNC=3282 UniProtKB=P60842,HUMAN HGNC=13759 UniProtKB=Q7L576,HUMAN HGNC=10404 UniProtKB=P15880,HUMAN HGNC=11572 UniProtKB=P26639,HUMAN HGNC=17894 UniProtKB=Q14966,HUMAN HGNC=9207 UniProtKB=Q9UFF9,HUMAN HGNC=4622 UniProtKB=Q8IYD1,HUMAN HGNC=1243 UniProtKB=Q07021,HUMAN HGNC=10372 UniProtKB=P05386,HUMAN HGNC=3189 UniProtKB=P68104,HUMAN HGNC=20 UniProtKB=P49588,HUMAN HGNC=4162 UniProtKB=P41250,HUMAN HGNC=3213 UniProtKB=P26641,HUMAN HGNC=3200 UniProtKB=Q5VTE0,HUMAN HGNC=3282 UniProtKB=P60842,HUMAN HGNC=13759 UniProtKB=Q7L576,HUMAN HGNC=10404 UniProtKB=P15880,HUMAN HGNC=11572 UniProtKB=P26639,HUMAN HGNC=17894 UniProtKB=Q14966,HUMAN HGNC=9207 UniProtKB=Q9UFF9,HUMAN HGNC=4622 UniProtKB=Q8IYD1,HUMAN HGNC=1243 UniProtKB=Q07021,HUMAN HGNC=10372 UniProtKB=P05386,HUMAN HGNC=3189 UniProtKB=P68104,HUMAN HGNC=20 UniProtKB=P49588,HUMAN HGNC=4162 UniProtKB=P41250,HUMAN HGNC=3213 UniProtKB=P26641,HUMAN HGNC=3200 UniProtKB=Q5VTE0,HUMAN HGNC=3282 UniProtKB=P60842,HUMAN HGNC=13759 UniProtKB=Q7L576,HUMAN HGNC=10404 UniProtKB=P15880,HUMAN HGNC=11572 UniProtKB=P26639,HUMAN HGNC=17894 UniProtKB=Q14966,HUMAN HGNC=9207 UniProtKB=Q9UFF9,HUMAN HGNC=4622 UniProtKB=Q8IYD1,HUMAN HGNC=1243 UniProtKB=Q07021,HUMAN HGNC=10372 UniProtKB=P05386,HUMAN HGNC=3189 UniProtKB=P68104,HUMAN HGNC=20 UniProtKB=P49588,HUMAN HGNC=4162 UniProtKB=P41250,HUMAN HGNC=3213 UniProtKB=P26641,HUMAN HGNC=3200 UniProtKB=Q5VTE0,HUMAN HGNC=3282 UniProtKB=P60842,HUMAN HGNC=13759 UniProtKB=Q7L576,HUMAN HGNC=10404 UniProtKB=P15880,HUMAN HGNC=11572 UniProtKB=P26639,HUMAN HGNC=17894 UniProtKB=Q14966,HUMAN HGNC=9207 UniProtKB=Q9UFF9,HUMAN HGNC=4622 UniProtKB=Q8IYD1,HUMAN HGNC=1243 UniProtKB=Q07021,HUMAN HGNC=10372 UniProtKB=P05386,HUMAN HGNC=3189 UniProtKB=P68104,HUMAN HGNC=20 UniProtKB=P49588,HUMAN HGNC=4162 UniProtKB=P41250,HUMAN HGNC=3213 UniProtKB=P26641,HUMAN HGNC=3200 UniProtKB=Q5VTE0,HUMAN HGNC=3282 UniProtKB=P60842,HUMAN HGNC=13759 UniProtKB=Q7L576,HUMAN HGNC=10404 UniProtKB=P15880,HUMAN HGNC=11572 UniProtKB=P26639,HUMAN HGNC=17894 UniProtKB=Q14966,HUMAN HGNC=9207 UniProtKB=Q9UFF9,HUMAN HGNC=4622 UniProtKB=Q8IYD1,HUMAN HGNC=1243 UniProtKB=Q07021,HUMAN HGNC=10372 UniProtKB=P05386,HUMAN HGNC=3189 UniProtKB=P68104,HUMAN HGNC=20 UniProtKB=P49588,HUMAN HGNC=4162 UniProtKB=P41250,HUMAN HGNC=3213 UniProtKB=P26641,HUMAN HGNC=3200 UniProtKB=Q5VTE0,HUMAN HGNC=3282 UniProtKB=P60842,HUMAN HGNC=13759 UniProtKB=Q7L576,HUMAN HGNC=10404 UniProtKB=P15880,HUMAN HGNC=11572 UniProtKB=P26639,HUMAN HGNC=17894 UniProtKB=Q14966,HUMAN HGNC=9207 UniProtKB=Q9UFF9,HUMAN HGNC=4622 UniProtKB=Q8IYD1,HUMAN HGNC=1243 UniProtKB=Q07021,HUMAN HGNC=10372 UniProtKB=P05386,HUMAN HGNC=3189 UniProtKB=P68104,HUMAN HGNC=20 UniProtKB=P49588,HUMAN HGNC=4162 UniProtKB=P41250,HUMAN HGNC=3213 UniProtKB=P26641,HUMAN HGNC=3200 UniProtKB=Q5VTE0,HUMAN HGNC=3282 UniProtKB=P60842,HUMAN HGNC=13759 UniProtKB=Q7L576,HUMAN HGNC=10404 UniProtKB=P15880,HUMAN HGNC=11572 UniProtKB=P26639,HUMAN HGNC=17894 UniProtKB=Q14966,HUMAN HGNC=9207 UniProtKB=Q9UFF9,HUMAN HGNC=4622 UniProtKB=Q8IYD1,HUMAN HGNC=1243 UniProtKB=Q07021,HUMAN HGNC=10372 UniProtKB=P05386,HUMAN HGNC=3189 UniProtKB=P68104,HUMAN HGNC=20 UniProtKB=P49588,HUMAN HGNC=4162 UniProtKB=P41250,HUMAN HGNC=3213 UniProtKB=P26641,HUMAN HGNC=3200 UniProtKB=Q5VTE0,HUMAN HGNC=3282 UniProtKB=P60842,HUMAN HGNC=13759 UniProtKB=Q7L576,HUMAN HGNC=10404 UniProtKB=P15880,HUMAN HGNC=11572 UniProtKB=P26639,HUMAN HGNC=17894 UniProtKB=Q14966,HUMAN HGNC=9207 UniProtKB=Q9UFF9,HUMAN HGNC=4622 UniProtKB=Q8IYD1,HUMAN HGNC=1243 UniProtKB=Q07021,HUMAN HGNC=10372 UniProtKB=P05386,HUMAN HGNC=3189 UniProtKB=P68104,HUMAN HGNC=20 UniProtKB=P49588,HUMAN HGNC=4162 UniProtKB=P41250,HUMAN HGNC=3213 UniProtKB=P26641,HUMAN HGNC=3200 UniProtKB=Q5VTE0,HUMAN HGNC=3282 UniProtKB=P60842,HUMAN HGNC=13759 UniProtKB=Q7L576,HUMAN HGNC=10404 UniProtKB=P15880,HUMAN HGNC=11572 UniProtKB=P26639,HUMAN HGNC=17894 UniProtKB=Q14966,HUMAN HGNC=9207 UniProtKB=Q9UFF9,HUMAN HGNC=4622 UniProtKB=Q8IYD1,HUMAN HGNC=1243 UniProtKB=Q07021,HUMAN HGNC=10372 UniProtKB=P05386,HUMAN HGNC=3189 UniProtKB=P68104,HUMAN HGNC=20 UniProtKB=P49588,HUMAN HGNC=4162 UniProtKB=P41250,HUMAN HGNC=3213 UniProtKB=P26641,HUMAN HGNC=3200 UniProtKB=Q5VTE0,HUMAN HGNC=3282 UniProtKB=P60842,HUMAN HGNC=13759 UniProtKB=Q7L576,HUMAN HGNC=10404 UniProtKB=P15880,HUMAN HGNC=11572 UniProtKB=P26639,HUMAN HGNC=17894 UniProtKB=Q14966,HUMAN HGNC=9207 UniProtKB=Q9UFF9,HUMAN HGNC=4622 UniProtKB=Q8IYD1,HUMAN HGNC=1243 UniProtKB=Q07021,HUMAN HGNC=10372 UniProtKB=P05386,HUMAN HGNC=3189 UniProtKB=P68104,HUMAN HGNC=20 UniProtKB=P49588,HUMAN HGNC=4162 UniProtKB=P41250,HUMAN HGNC=3213 UniProtKB=P26641,HUMAN HGNC=3200 UniProtKB=Q5VTE0,HUMAN HGNC=3282 UniProtKB=P60842,HUMAN HGNC=13759 UniProtKB=Q7L576,HUMAN HGNC=10404 UniProtKB=P15880,HUMAN HGNC=11572 UniProtKB=P26639,HUMAN HGNC=17894 UniProtKB=Q14966,HUMAN HGNC=9207 UniProtKB=Q9UFF9,HUMAN HGNC=4622 UniProtKB=Q8IYD1,HUMAN HGNC=1243 UniProtKB=Q07021,HUMAN HGNC=10372 UniProtKB=P05386,HUMAN HGNC=3189 UniProtKB=P68104,HUMAN HGNC=20 UniProtKB=P49588,HUMAN HGNC=4162 UniProtKB=P41250,HUMAN HGNC=3213 UniProtKB=P26641,HUMAN HGNC=3200 UniProtKB=Q5VTE0,HUMAN HGNC=3282 UniProtKB=P60842,HUMAN HGNC=13759 UniProtKB=Q7L576,HUMAN HGNC=10404 UniProtKB=P15880,HUMAN HGNC=11572 UniProtKB=P26639,HUMAN HGNC=17894 UniProtKB=Q14966,HUMAN HGNC=9207 UniProtKB=Q9UFF9,HUMAN HGNC=4622 UniProtKB=Q8IYD1,HUMAN HGNC=1243 UniProtKB=Q07021,HUMAN HGNC=10372 UniProtKB=P05386,HUMAN HGNC=3189 UniProtKB=P68104,HUMAN HGNC=20 UniProt |                                                                                                                                                   |

|            |                                                                                                                                                                                                                                                                                                                                                                                                                                                                                                                                                                                                                                                                                                  |                                                                  |
|------------|--------------------------------------------------------------------------------------------------------------------------------------------------------------------------------------------------------------------------------------------------------------------------------------------------------------------------------------------------------------------------------------------------------------------------------------------------------------------------------------------------------------------------------------------------------------------------------------------------------------------------------------------------------------------------------------------------|------------------------------------------------------------------|
| GO:0001508 | MAN HGNC=4621 UniProtKB=P15170,HUMAN HGNC=17970 UniProtKB=Q9BPZ3,HUMAN Gene=EIF2S3L UniProtKB=Q2VIR3,HUMAN HGNC=12729 UniProtKB=P23381,HUMAN HGNC=3285 UniProtKB=P23588,HUMAN HGNC=3211 UniProtKB=P29692,HUMAN HGNC=27424 UniProtKB=Q5T481,HUMAN HGNC=24728 UniProtKB=A2RTX5,HUMAN HGNC=3300 UniProtKB=P63241,HUMAN HGNC=2678 UniProtKB=P14868,HUMAN HGNC=3214 UniProtKB=P13639,HUMAN HGNC=9583 UniProtKB=P26599,HUMAN HGNC=3208 UniProtKB=P24534,HUMAN HGNC=12420 UniProtKB=P49411                                                                                                                                                                                                              | action potential                                                 |
| GO:1990023 | HUMAN HGNC=5048 UniProtKB=Q00839                                                                                                                                                                                                                                                                                                                                                                                                                                                                                                                                                                                                                                                                 | mitotic spindle midzone                                          |
| GO:0004714 | HUMAN HGNC=19296 UniProtKB=Q9UF33,HUMAN HGNC=6091 UniProtKB=P06213                                                                                                                                                                                                                                                                                                                                                                                                                                                                                                                                                                                                                               | transmembrane receptor<br>protein tyrosine kinase activity       |
| PC00099    | HUMAN HGNC=28648 UniProtKB=Q8IYB7                                                                                                                                                                                                                                                                                                                                                                                                                                                                                                                                                                                                                                                                | exoribonuclease                                                  |
| GO:0008277 | HUMAN HGNC=711 UniProtKB=P49407                                                                                                                                                                                                                                                                                                                                                                                                                                                                                                                                                                                                                                                                  | regulation of G protein-coupled receptor signaling pathway       |
|            | HUMAN HGNC=15476 UniProtKB=P63167,HUMAN HGNC=15848 UniProtKB=Q14141,HUMAN HGNC=16053 UniProtKB=Q8N1V2,HUMAN HGNC=20908 UniProtKB=Q86YF9,HUMAN HGNC=2952 UniProtKB=Q96JB1,HUMAN HGNC=25631 UniProtKB=Q96MT7,HUMAN HGNC=1717 UniProtKB=Q16181,HUMAN HGNC=3244 UniProtKB=Q9NZN3,HUMAN HGNC=29262 UniProtKB=Q9P2H3,HUMAN HGNC=7729 UniProtKB=Q15019                                                                                                                                                                                                                                                                                                                                                  | intraciliary transport<br>involved in cilium assembly            |
| GO:0035735 |                                                                                                                                                                                                                                                                                                                                                                                                                                                                                                                                                                                                                                                                                                  |                                                                  |
| GO:0046390 | HUMAN HGNC=9465 UniProtKB=P11908,HUMAN HGNC=11834 UniProtKB=P29401,HUMAN HGNC=9462 UniProtKB=P60891                                                                                                                                                                                                                                                                                                                                                                                                                                                                                                                                                                                              | ribose phosphate<br>biosynthetic process                         |
| GO:0046488 | HUMAN HGNC=17059 UniProtKB=Q9NTJ5,HUMAN HGNC=10542 UniProtKB=O95248                                                                                                                                                                                                                                                                                                                                                                                                                                                                                                                                                                                                                              | phosphatidylinositol<br>metabolic process                        |
| GO:0015318 | HUMAN HGNC=10989 UniProtKB=Q00325,HUMAN HGNC=11027 UniProtKB=P02730                                                                                                                                                                                                                                                                                                                                                                                                                                                                                                                                                                                                                              | inorganic molecular entity<br>transmembrane transporter activity |
|            | HUMAN HGNC=117 UniProtKB=P21399,HUMAN HGNC=5382 UniProtKB=O75874,HUMAN HGNC=6970 UniProtKB=P40925,HUMAN HGNC=5383 UniProtKB=P48735,HUMAN HGNC=5386 UniProtKB=P51553                                                                                                                                                                                                                                                                                                                                                                                                                                                                                                                              | carboxylic acid metabolic process                                |
| GO:0019752 |                                                                                                                                                                                                                                                                                                                                                                                                                                                                                                                                                                                                                                                                                                  |                                                                  |
| GO:0010975 | HUMAN HGNC=11590 UniProtKB=Q16650                                                                                                                                                                                                                                                                                                                                                                                                                                                                                                                                                                                                                                                                | regulation of neuron projection development                      |
|            | HUMAN HGNC=19985 UniProtKB=P53999,HUMAN HGNC=9545 UniProtKB=P28062,HUMAN HGNC=9414 UniProtKB=Q13976,HUMAN HGNC=16369 UniProtKB=Q99497,HUMAN HGNC=12401 UniProtKB=P33981,HUMAN HGNC=10496 UniProtKB=P06703,HUMAN HGNC=9554 UniProtKB=Q99460,HUMAN HGNC=8988 UniProtKB=Q13526,HUMAN HGNC=4719 UniProtKB=P16401,HUMAN HGNC=9536 UniProtKB=O14818,HUMAN HGNC=12468 UniProtKB=P0CG48,HUMAN HGNC=9846 UniProtKB=P62826,HUMAN HGNC=17894 UniProtKB=Q14966,HUMAN HGNC=9281 UniProtKB=P62136,HUMAN HGNC=17598 UniProtKB=Q9Y385,HUMAN HGNC=30646 UniProtKB=Q7KZF4,HUMAN HGNC=25397 UniProtKB=Q6MZP7,HUMAN HGNC=12476 UniProtKB=P61077,HUMAN HGNC=14959 UniProtKB=Q96T37,HUMAN HGNC=7732 UniProtKB=Q15843,H | nucleus                                                          |
| GO:0005634 |                                                                                                                                                                                                                                                                                                                                                                                                                                                                                                                                                                                                                                                                                                  |                                                                  |

UMAN|HGNC=20250|UniProtKB=Q96IF1,HUMAN|HGNC=9275|UniProtKB=P35813,HUMAN|HGNC=13485|UniProtKB=Q9BXU7,HUMAN|HGNC=9531|UniProtKB=P25787,HUMAN|HGNC=30025|UniProtKB=Q5VV67,HUMAN|HGNC=9459|UniProtKB=Q92786,HUMAN|HGNC=6767|UniProtKB=Q15797,HUMAN|HGNC=11179|UniProtKB=P00441,HUMAN|HGNC=5253|UniProtKB=P07900,HUMAN|HGNC=9539|UniProtKB=P49721,HUMAN|HGNC=14060|UniProtKB=Q9UBZ9,HUMAN|HGNC=9349|UniProtKB=Q9NQX1,HUMAN|HGNC=19825|UniProtKB=Q6SA08,HUMAN|HGNC=7326|UniProtKB=P20585,HUMAN|HGNC=25035|UniProtKB=Q5VVQ6,HUMAN|HGNC=9386|UniProtKB=Q9UGJ0,HUMAN|HGNC=23818|UniProtKB=Q14684,HUMAN|HGNC=7803|UniProtKB=Q12986,HUMAN|HGNC=20165|UniProtKB=Q9P2P1,HUMAN|HGNC=9533|UniProtKB=P25789,HUMAN|HGNC=29158|UniProtKB=Q9Y2G9,HUMAN|HGNC=23708|UniProtKB=Q6ZR52,HUMAN|HGNC=9380|UniProtKB=P17612,HUMAN|HGNC=29084|UniProtKB=O75123,HUMAN|HGNC=347|UniProtKB=Q09666,HUMAN|HGNC=12463|UniProtKB=POCG47,HUMAN|HGNC=51815|UniProtKB=A0A1W2PPM1,HUMAN|HGNC=12458|UniProtKB=P62987,HUMAN|HGNC=5238|UniProtKB=P11021,HUMAN|HGNC=14451|UniProtKB=Q9BQK8,HUMAN|HGNC=16298|UniProtKB=Q504T8,HUMAN|HGNC=9381|UniProtKB=P22694,HUMAN|HGNC=28972|UniProtKB=Q8IXZ2,HUMAN|HGNC=13506|UniProtKB=Q8TBJ5,HUMAN|HGNC=33108|UniProtKB=Q6NX45,HUMAN|HGNC=13061|UniProtKB=Q14587,HUMAN|HGNC=2062|UniProtKB=O00299,HUMAN|HGNC=21605|UniProtKB=Q14151,HUMAN|HGNC=18807|UniProtKB=O94983,HUMAN|HGNC=21539|UniProtKB=Q9BX46,HUMAN|HGNC=7446|UniProtKB=Q9Y4I5,HUMAN|HGNC=42937|UniProtKB=PODME0,HUMAN|HGNC=17801|UniProtKB=Q8NHY6,HUMAN|HGNC=7106|UniProtKB=P54252,HUMAN|HGNC=9885|UniProtKB=P29374,HUMAN|HGNC=6871|UniProtKB=P28482,HUMAN|HGNC=9308|UniProtKB=Q15257,HUMAN|HGNC=17177|UniProtKB=Q8IUI8,HUMAN|HGNC=5044|UniProtKB=P61978,HUMAN|HGNC=11125|UniProtKB=P61956,HUMAN|HGNC=13518|UniProtKB=Q9Y696,HUMAN|HGNC=1745|UniProtKB=O00311,HUMAN|HGNC=28422|UniProtKB=Q8NCE0,HUMAN|HGNC=7670|UniProtKB=Q9Y6Q9,HUMAN|HGNC=20597|UniProtKB=P61960,HUMAN|HGNC=30688|UniProtKB=Q86VP6,HUMAN|HGNC=3213|UniProtKB=P26641,HUMAN|HGNC=12666|UniProtKB=P55072,HUMAN|HGNC=8052|UniProtKB=Q9UKK9,HUMAN|HGNC=15935|UniProtKB=Q9H4I2,HUMAN|HGNC=12475|UniProtKB=P62837,HUMAN|HGNC=19312|UniProtKB=Q56P03,HUMAN|HGNC=9261|UniProtKB=Q13356,HUMAN|HGNC=10774|UniProtKB=P23246,HUMAN|HGNC=7640|UniProtKB=Q99733,HUMAN|HGNC=18994|UniProtKB=Q8TDC3,HUMAN|HGNC=7198|UniProtKB=Q86VD1,HUMAN|HGNC=6876|UniProtKB=Q16539,HUMAN|HGNC=10432|UniProtKB=P51812,HUMAN|HGNC=5237|UniProtKB=P34932,HUMAN|HGNC=20063|UniProtKB=Q86T82,HUMAN|HGNC=9530|UniProtKB=P25786,HUMAN|HGNC=28843|UniProtKB=Q9HC44,HUMAN|HGNC=12488|UniProtKB=P68036,HUMAN|HGNC=12491|UniProtKB=P61081,HUMAN|HGNC=32060|UniProtKB=Q5TEC6,HUMAN|HGNC=6400|UniProtKB=Q14974,HUMAN|HGNC=16969|UniProtKB=Q92598,HUMAN|HGNC=5241|UniProtKB=P11142,HUMAN|HGNC=1173|UniProtKB=Q5H9R7,HUMAN|HGNC=9583|UniProtKB=P26599,HUMAN|HGNC=12628|UniProtKB=P45974,HUMAN|HGNC=4718|UniProtKB=P10412,HUMAN

|            |                                                                                                                                                                                                                                                                                                                                                                                                                                                                                                                                                                                                                                                                                                                                                                                                                                                                                                                                                                                                                                                                                                                                                                                                                                                                                                                                                                                                                                                                                                                                                                                                                                                                                |                                                                                                           |
|------------|--------------------------------------------------------------------------------------------------------------------------------------------------------------------------------------------------------------------------------------------------------------------------------------------------------------------------------------------------------------------------------------------------------------------------------------------------------------------------------------------------------------------------------------------------------------------------------------------------------------------------------------------------------------------------------------------------------------------------------------------------------------------------------------------------------------------------------------------------------------------------------------------------------------------------------------------------------------------------------------------------------------------------------------------------------------------------------------------------------------------------------------------------------------------------------------------------------------------------------------------------------------------------------------------------------------------------------------------------------------------------------------------------------------------------------------------------------------------------------------------------------------------------------------------------------------------------------------------------------------------------------------------------------------------------------|-----------------------------------------------------------------------------------------------------------|
|            | HGNC=12738   UniProtKB=Q969T9, HUMAN   HGNC=12494   UniProtKB=Q13404, HUMAN   HGNC=24358   UniProtKB=Q9H2G4, HUMAN   HGNC=6401   UniProtKB=Q92973, HUMAN   HGNC=23077   UniProtKB=Q96FW1, HUMAN   HGNC=8783   UniProtKB=Q08499, HUMAN   HGNC=11124   UniProtKB=P55854, HUMAN   HGNC=20635   UniProtKB=Q14997, HUMAN   HGNC=12469   UniProtKB=P22314, HUMAN   HGNC=12612   UniProtKB=P54578, HUMAN   HGNC=10760   UniProtKB=Q01105, HUMAN   HGNC=20473   UniProtKB=Q9BX63, HUMAN   HGNC=26427   UniProtKB=Q96ND8, HUMAN   HGNC=9559   UniProtKB=Q13200, HUMAN   HGNC=9635   UniProtKB=Q12974, HUMAN   HGNC=25490   UniProtKB=Q96HA8, HUMAN   HGNC=9540   UniProtKB=P49720, HUMAN   HGNC=15912   UniProtKB=Q9UNZ2, HUMAN   HGNC=29327   UniProtKB=Q5VZ46, HUMAN   HGNC=15818   UniProtKB=Q9H0Z9, HUMAN   HGNC=3750   UniProtKB=Q13045, HUMAN   HGNC=4861   UniProtKB=Q9NRZ9, HUMAN   HGNC=17808   UniProtKB=Q9UPT8, HUMAN   HGNC=17860   UniProtKB=Q8NC51, HUMAN   HGNC=15667   UniProtKB=P58546, HUMAN   HGNC=26951   UniProtKB=Q86YL5, HUMAN   HGNC=24054   UniProtKB=Q8NG31, HUMAN   HGNC=2717   UniProtKB=Q16531, HUMAN   HGNC=18676   UniProtKB=Q86XP3, HUMAN   HGNC=27424   UniProtKB=Q5T481, HUMAN   HGNC=13109   UniProtKB=P17038, HUMAN   HGNC=9535   UniProtKB=P60900, HUMAN   HGNC=12492   UniProtKB=P61088, HUMAN   HGNC=12379   UniProtKB=Q15631, HUMAN   HGNC=30410   UniProtKB=Q9BXA6, HUMAN   HGNC=4716   UniProtKB=P16403, HUMAN   HGNC=9645   UniProtKB=Q05209, HUMAN   HGNC=10899   UniProtKB=P63208, HUMAN   HGNC=7547   UniProtKB=P10243, HUMAN   HGNC=9532   UniProtKB=P25788, HUMAN   HGNC=9537   UniProtKB=P20618, HUMAN   HGNC=20076   UniProtKB=Q96K76 |                                                                                                           |
| GO:0140098 | HUMAN   HGNC=10898   UniProtKB=Q15477, HUMAN   HGNC=17821   UniProtKB=O00148                                                                                                                                                                                                                                                                                                                                                                                                                                                                                                                                                                                                                                                                                                                                                                                                                                                                                                                                                                                                                                                                                                                                                                                                                                                                                                                                                                                                                                                                                                                                                                                                   | catalytic activity, acting on RNA                                                                         |
| GO:0043473 | HUMAN   HGNC=9767   UniProtKB=O00194                                                                                                                                                                                                                                                                                                                                                                                                                                                                                                                                                                                                                                                                                                                                                                                                                                                                                                                                                                                                                                                                                                                                                                                                                                                                                                                                                                                                                                                                                                                                                                                                                                           | pigmentation                                                                                              |
| GO:0030148 | HUMAN   HGNC=24175   UniProtKB=Q9P035                                                                                                                                                                                                                                                                                                                                                                                                                                                                                                                                                                                                                                                                                                                                                                                                                                                                                                                                                                                                                                                                                                                                                                                                                                                                                                                                                                                                                                                                                                                                                                                                                                          | sphingolipid biosynthetic process                                                                         |
| GO:0033043 | HUMAN   HGNC=8761   UniProtKB=Q9BUL8, HUMAN   HGNC=3350   UniProtKB=P06733, HUMAN   HGNC=3353   UniProtKB=P09104, HUMAN   HGNC=10534   UniProtKB=Q9NR31, HUMAN   HGNC=3354   UniProtKB=P13929                                                                                                                                                                                                                                                                                                                                                                                                                                                                                                                                                                                                                                                                                                                                                                                                                                                                                                                                                                                                                                                                                                                                                                                                                                                                                                                                                                                                                                                                                  | regulation of organelle organization                                                                      |
| GO:0042632 | HUMAN   HGNC=1869   UniProtKB=P11597, HUMAN   HGNC=603   UniProtKB=P04114                                                                                                                                                                                                                                                                                                                                                                                                                                                                                                                                                                                                                                                                                                                                                                                                                                                                                                                                                                                                                                                                                                                                                                                                                                                                                                                                                                                                                                                                                                                                                                                                      | cholesterol homeostasis<br>negative regulation of double-strand break repair via homologous recombination |
| GO:2000042 | HUMAN   HGNC=17196   UniProtKB=Q8NG08                                                                                                                                                                                                                                                                                                                                                                                                                                                                                                                                                                                                                                                                                                                                                                                                                                                                                                                                                                                                                                                                                                                                                                                                                                                                                                                                                                                                                                                                                                                                                                                                                                          |                                                                                                           |
| GO:0007265 | HUMAN   HGNC=9855   UniProtKB=P62834, HUMAN   HGNC=9862   UniProtKB=P61225, HUMAN   HGNC=6407   UniProtKB=P01116, HUMAN   HGNC=6766   UniProtKB=Q8WXC6, HUMAN   HGNC=9857   UniProtKB=P61224, HUMAN   HGNC=25361   UniProtKB=Q8N264, HUMAN   HGNC=9840   UniProtKB=P11234                                                                                                                                                                                                                                                                                                                                                                                                                                                                                                                                                                                                                                                                                                                                                                                                                                                                                                                                                                                                                                                                                                                                                                                                                                                                                                                                                                                                      | Ras protein signal transduction                                                                           |
| GO:0008180 | HUMAN   HGNC=30747   UniProtKB=P61201, HUMAN   HGNC=21314   UniProtKB=Q8WXC6, HUMAN   HGNC=5239   UniProtKB=P17066, HUMAN   HGNC=5240   UniProtKB=P48741, HUMAN   HGNC=2239   UniProtKB=Q9UNS2                                                                                                                                                                                                                                                                                                                                                                                                                                                                                                                                                                                                                                                                                                                                                                                                                                                                                                                                                                                                                                                                                                                                                                                                                                                                                                                                                                                                                                                                                 | COP9 signalosome                                                                                          |

|            |                                                                                                                                                                                                                                                                                                            |                                                                                                                |
|------------|------------------------------------------------------------------------------------------------------------------------------------------------------------------------------------------------------------------------------------------------------------------------------------------------------------|----------------------------------------------------------------------------------------------------------------|
| GO:0004115 | HUMAN   HGNC=8783   UniProtKB=Q08499                                                                                                                                                                                                                                                                       | 3',5'-cyclic-AMP phosphodiesterase activity                                                                    |
| GO:0000228 | HUMAN   HGNC=5048   UniProtKB=Q00839, HUMAN   HGNC=23845   UniProtKB=Q8IY92                                                                                                                                                                                                                                | nuclear chromosome                                                                                             |
| PC00223    | HUMAN   HGNC=3189   UniProtKB=P68104, HUMAN   HGNC=4622   UniProtKB=Q8IYD1, HUMAN   HGNC=4621   UniProtKB=P15170, HUMAN   HGNC=3200   UniProtKB=Q5VTE0                                                                                                                                                     | translation factor                                                                                             |
| GO:0001707 | HUMAN   HGNC=2188   UniProtKB=Q99715                                                                                                                                                                                                                                                                       | mesoderm formation                                                                                             |
| GO:0036156 | HUMAN   HGNC=8898   UniProtKB=P07205, HUMAN   HGNC=2949   UniProtKB=Q8TD57                                                                                                                                                                                                                                 | inner dynein arm RNA polymerase II general transcription initiation factor activity                            |
| GO:0016251 | HUMAN   HGNC=17305   UniProtKB=Q9Y6J9                                                                                                                                                                                                                                                                      |                                                                                                                |
| GO:0070628 | HUMAN   HGNC=20635   UniProtKB=Q14997, HUMAN   HGNC=9813   UniProtKB=P54727                                                                                                                                                                                                                                | proteasome binding                                                                                             |
| GO:0048199 | HUMAN   HGNC=10534   UniProtKB=Q9NR31, HUMAN   HGNC=24878   UniProtKB=Q9BVK6                                                                                                                                                                                                                               | vesicle targeting, to, from or within Golgi cysteine-type endopeptidase activity involved in apoptotic process |
| GO:0097153 | HUMAN   HGNC=1504   UniProtKB=P42574, HUMAN   HGNC=1507   UniProtKB=P55212                                                                                                                                                                                                                                 |                                                                                                                |
| GO:1990904 | HUMAN   HGNC=5043   UniProtKB=P31942, HUMAN   HGNC=3214   UniProtKB=P13639, HUMAN   HGNC=7910   UniProtKB=P06748                                                                                                                                                                                           | ribonucleoprotein complex                                                                                      |
| GO:1903008 | HUMAN   HGNC=12666   UniProtKB=P55072                                                                                                                                                                                                                                                                      | organelle disassembly                                                                                          |
| GO:0051205 | HUMAN   HGNC=26801   UniProtKB=Q8N8Q8                                                                                                                                                                                                                                                                      | protein insertion into membrane                                                                                |
| GO:0034641 | HUMAN   HGNC=2328   UniProtKB=P50416                                                                                                                                                                                                                                                                       | cellular nitrogen compound metabolic process                                                                   |
| GO:0006623 | HUMAN   HGNC=568   UniProtKB=O14617, HUMAN   HGNC=1908   UniProtKB=Q96RL7, HUMAN   HGNC=23594   UniProtKB=Q709C8                                                                                                                                                                                           | protein targeting to vacuole                                                                                   |
| GO:0071944 | HUMAN   HGNC=25648   UniProtKB=Q8N5J2                                                                                                                                                                                                                                                                      | cell periphery                                                                                                 |
| GO:1902911 | HUMAN   HGNC=9386   UniProtKB=Q9UGJ0, HUMAN   HGNC=6091   UniProtKB=P06213                                                                                                                                                                                                                                 | protein kinase complex                                                                                         |
| GO:0050839 | HUMAN   HGNC=29943   UniProtKB=Q9NT68, HUMAN   HGNC=11828   UniProtKB=Q9UDY2, HUMAN   HGNC=29557   UniProtKB=Q0ZGT2, HUMAN   HGNC=11771   UniProtKB=Q15582                                                                                                                                                 | cell adhesion molecule binding                                                                                 |
| GO:0051092 | HUMAN   HGNC=30140   UniProtKB=A7MCY6, HUMAN   HGNC=16391   UniProtKB=Q9H257, HUMAN   HGNC=16276   UniProtKB=Q9C035, HUMAN   HGNC=1628   UniProtKB=P08571, HUMAN   HGNC=3157   UniProtKB=Q92838, HUMAN   HGNC=29890   UniProtKB=Q86UT6, HUMAN   HGNC=9275   UniProtKB=P35813                               | positive regulation of NF-kappaB transcription factor activity                                                 |
| GO:0006470 | HUMAN   HGNC=1173   UniProtKB=Q5H9R7, HUMAN   HGNC=19388   UniProtKB=P49593, HUMAN   HGNC=9673   UniProtKB=Q12913, HUMAN   HGNC=9304   UniProtKB=P63151                                                                                                                                                    | protein dephosphorylation                                                                                      |
| GO:1901361 | HUMAN   HGNC=2689   UniProtKB=P09172, HUMAN   HGNC=82   UniProtKB=P09110                                                                                                                                                                                                                                   | organic cyclic compound catabolic process                                                                      |
| GO:0030154 | HUMAN   HGNC=9866   UniProtKB=P13631, HUMAN   HGNC=6767   UniProtKB=Q15797, HUMAN   HGNC=4037   UniProtKB=P06241, HUMAN   HGNC=2188   UniProtKB=Q99715, HUMAN   HGNC=9583   UniProtKB=P26599, HUMAN   HGNC=3815   UniProtKB=Q12951, HUMAN   HGNC=7967   UniProtKB=Q96RI1, HUMAN   HGNC=12841   UniProtKB=P | cell differentiation                                                                                           |

|                |                                                                                                                                                                                                                                                                                                                                                                                                                                                                                                                                                                                                                                                                                                                                                                                                                                                                                                                                                                                                                                                                                                                                                                                                                                                                                                                                                                                                                                                                                                                                                                                                                                                                                                                                                                                                                                                                                                                                                                                                                                                                                                                                                                                                                                                                                                                                                                                                                                                                                                                                                                                                                                         |                                                                                                                      |
|----------------|-----------------------------------------------------------------------------------------------------------------------------------------------------------------------------------------------------------------------------------------------------------------------------------------------------------------------------------------------------------------------------------------------------------------------------------------------------------------------------------------------------------------------------------------------------------------------------------------------------------------------------------------------------------------------------------------------------------------------------------------------------------------------------------------------------------------------------------------------------------------------------------------------------------------------------------------------------------------------------------------------------------------------------------------------------------------------------------------------------------------------------------------------------------------------------------------------------------------------------------------------------------------------------------------------------------------------------------------------------------------------------------------------------------------------------------------------------------------------------------------------------------------------------------------------------------------------------------------------------------------------------------------------------------------------------------------------------------------------------------------------------------------------------------------------------------------------------------------------------------------------------------------------------------------------------------------------------------------------------------------------------------------------------------------------------------------------------------------------------------------------------------------------------------------------------------------------------------------------------------------------------------------------------------------------------------------------------------------------------------------------------------------------------------------------------------------------------------------------------------------------------------------------------------------------------------------------------------------------------------------------------------------|----------------------------------------------------------------------------------------------------------------------|
|                | 07947,HUMAN HGNC=7640 UniProtKB=Q99733,HUMAN HGNC=6735 UniProtKB=P07948,HUMAN HGNC=24903 UniProtKB=Q9Y520                                                                                                                                                                                                                                                                                                                                                                                                                                                                                                                                                                                                                                                                                                                                                                                                                                                                                                                                                                                                                                                                                                                                                                                                                                                                                                                                                                                                                                                                                                                                                                                                                                                                                                                                                                                                                                                                                                                                                                                                                                                                                                                                                                                                                                                                                                                                                                                                                                                                                                                               |                                                                                                                      |
| GO:200123<br>7 | <p>HUMAN HGNC=11283 UniProtKB=P12931</p> <p>HUMAN HGNC=5575 UniProtKB=A0A0B4J1V2,HUMAN HGNC=607 UniProtKB=P02654,HUMAN HGNC=9784 UniProtKB=P61020,HUMAN HGNC=5645 UniProtKB=A0A0C4DH34,HUMAN HGNC=5549 UniProtKB=A0A0C4DH31,HUMAN HGNC=555 UniProtKB=O43747,HUMAN HGNC=5554 UniProtKB=P01743,HUMAN HGNC=5480 UniProtKB=P01880,HUMAN HGNC=5659 UniProtKB=A0A0C4DH38,HUMAN HGNC=5634 UniProtKB=A0A075B7F0,HUMAN HGNC=38476 UniProtKB=B9A064,HUMAN HGNC=2090 UniProtKB=P09496,HUMAN HGNC=5861 UniProtKB=A0M8Q6,HUMAN HGNC=5647 UniProtKB=A0A087WSY4,HUMAN HGNC=5563 UniProtKB=A0A075B7D0,HUMAN HGNC=5856 UniProtKB=P0DOY2,HUMAN HGNC=1406 UniProtKB=Q9Y698,HUMAN HGNC=3757 UniProtKB=O75955,HUMAN HGNC=5606 UniProtKB=P01763,HUMAN HGNC=9785 UniProtKB=P51148,HUMAN HGNC=9801 UniProtKB=P63000,HUMAN HGNC=5576 UniProtKB=P01817,HUMAN HGNC=5528 UniProtKB=P01861,HUMAN HGNC=5541 UniProtKB=P01871,HUMAN HGNC=5585 UniProtKB=A0A0C4DH32,HUMAN HGNC=9782 UniProtKB=P61018,HUMAN HGNC=9802 UniProtKB=P15153,HUMAN HGNC=5551 UniProtKB=A0A0C4DH33,HUMAN HGNC=3244 UniProtKB=Q9NZN3,HUMAN HGNC=11510 UniProtKB=Q8N9I0,HUMAN HGNC=7228 UniProtKB=P22897,HUMAN HGNC=5526 UniProtKB=P01859,HUMAN HGNC=5657 UniProtKB=P0DP08,HUMAN Ensembl=ENSG00000282639 UniProtKB=A0A0J9YX35,HUMAN HGNC=19760 UniProtKB=Q96T51,HUMAN Gene=HV309_HUMAN UniProtKB=P01782,HUMAN HGNC=18756 UniProtKB=Q9BYZ6,HUMAN HGNC=5654 UniProtKB=P01825,HUMAN HGNC=5553 UniProtKB=A0A0A0MS14,HUMAN Gene=HV108_HUMAN UniProtKB=P0DP01,HUMAN HGNC=5624 UniProtKB=A0A0B4J1X5,HUMAN HGNC=5620 UniProtKB=P01780,HUMAN HGNC=23186 UniProtKB=Q14677,HUMAN HGNC=5598 UniProtKB=A0A0C4DH35,HUMAN HGNC=5580 UniProtKB=P01762,HUMAN HGNC=5633 UniProtKB=A0A075B7D8,HUMAN HGNC=5582 UniProtKB=A0A0B4J1V0,HUMAN HGNC=5478 UniProtKB=P01876,HUMAN HGNC=26068 UniProtKB=Q6IAA8,HUMAN HGNC=5617 UniProtKB=A0A075B6Q5,HUMAN HGNC=711 UniProtKB=P49407,HUMAN HGNC=5594 UniProtKB=P0DP03,HUMAN HGNC=5655 UniProtKB=A0A0C4DH41,HUMAN HGNC=5636 UniProtKB=A0A075B7B8,HUMAN HGNC=5586 UniProtKB=A0A0B4J1V1,HUMAN HGNC=5581 UniProtKB=P01766,HUMAN HGNC=5622 UniProtKB=A0A0B4J1Y9,HUMAN HGNC=5652 UniProtKB=A0A075B6R2,HUMAN HGNC=5593 UniProtKB=P0DP02,HUMAN HGNC=11138 UniProtKB=P37840,HUMAN HGNC=3419 UniProtKB=P42566,HUMAN HGNC=5479 UniProtKB=P01877,HUMAN HGNC=561 UniProtKB=O95782,HUMAN HGNC=5619 UniProtKB=A0A0C4DH42,HUMAN HGNC=5596 UniProtKB=P01772,HUMAN HGNC=5550 UniProtKB=P23083,HUMAN HGNC=5604 UniProtKB=A0A0B4J1X8,HUMAN HGNC=570 UniProtKB=P53677,HUMAN HGNC=2974 UniProtKB=P50570,HUMAN HGNC=5525 UniProtKB=P01857,HUMAN HGNC=5662 UniProtKB=A0A0B4J1U7,HUMAN HGNC=24634 U</p> | <p>negative regulation of<br/>extrinsic apoptotic signaling<br/>pathway</p> <p>vesicle budding from<br/>membrane</p> |
| GO:000690<br>0 |                                                                                                                                                                                                                                                                                                                                                                                                                                                                                                                                                                                                                                                                                                                                                                                                                                                                                                                                                                                                                                                                                                                                                                                                                                                                                                                                                                                                                                                                                                                                                                                                                                                                                                                                                                                                                                                                                                                                                                                                                                                                                                                                                                                                                                                                                                                                                                                                                                                                                                                                                                                                                                         |                                                                                                                      |

|            |                                                                                                                                                                                                                                                                                                                                                                                                                                                                                                                                                                                                                                                                                                                                                                                                                                                                                                                                                                                                                                                                                                                                                                                                                                                |                                                                                    |
|------------|------------------------------------------------------------------------------------------------------------------------------------------------------------------------------------------------------------------------------------------------------------------------------------------------------------------------------------------------------------------------------------------------------------------------------------------------------------------------------------------------------------------------------------------------------------------------------------------------------------------------------------------------------------------------------------------------------------------------------------------------------------------------------------------------------------------------------------------------------------------------------------------------------------------------------------------------------------------------------------------------------------------------------------------------------------------------------------------------------------------------------------------------------------------------------------------------------------------------------------------------|------------------------------------------------------------------------------------|
|            | niProtKB=Q9UBC2,HUMAN HGNC=5601 UniProtKB=A0A0C4DH36,HUMAN HGNC=5716 UniProtKB=P01834,HUMAN HGNC=5588 UniProtKB=P01764,HUMAN HGNC=15578 UniProtKB=Q96D71,HUMAN HGNC=5857 UniProtKB=P0DOY3,HUMAN HGNC=1736 UniProtKB=P60953,HUMAN HGNC=5610 UniProtKB=P01767,HUMAN Ensembl=ENSG00000282150 UniProtKB=A0A0J9YY99,HUMAN HGNC=29125 UniProtKB=Q9UQ16,HUMAN HGNC=5527 UniProtKB=P01860,HUMAN HGNC=2092 UniProtKB=Q00610HUMAN HGNC=30013 UniProtKB=Q96PD5,HUMAN HGNC=2761 UniProtKB=P59665,HUMAN HGNC=6517 UniProtKB=P18428,HUMAN HGNC=1472 UniProtKB=P49913,HUMAN HGNC=6740 UniProtKB=P61626                                                                                                                                                                                                                                                                                                                                                                                                                                                                                                                                                                                                                                                        | defense response to Gram-positive bacterium                                        |
| GO:0050830 |                                                                                                                                                                                                                                                                                                                                                                                                                                                                                                                                                                                                                                                                                                                                                                                                                                                                                                                                                                                                                                                                                                                                                                                                                                                |                                                                                    |
| GO:0031672 | HUMAN HGNC=7618 UniProtKB=O14974                                                                                                                                                                                                                                                                                                                                                                                                                                                                                                                                                                                                                                                                                                                                                                                                                                                                                                                                                                                                                                                                                                                                                                                                               | A band                                                                             |
| GO:0000045 | HUMAN HGNC=15912 UniProtKB=Q9UNZ2,HUMAN HGNC=9758 UniProtKB=P62820,HUMAN HGNC=18370 UniProtKB=Q9H0U4HUMAN HGNC=6047 UniProtKB=Q16891,HUMAN HGNC=23526 UniProtKB=Q8NE86,HUMAN HGNC=26801 UniProtKB=Q8N8Q8,HUMAN HGNC=10989 UniProtKB=Q00325                                                                                                                                                                                                                                                                                                                                                                                                                                                                                                                                                                                                                                                                                                                                                                                                                                                                                                                                                                                                     | autophagosome assembly<br>integral component of<br>mitochondrial inner<br>membrane |
| GO:0031305 |                                                                                                                                                                                                                                                                                                                                                                                                                                                                                                                                                                                                                                                                                                                                                                                                                                                                                                                                                                                                                                                                                                                                                                                                                                                | nucleoside-triphosphatase<br>regulator activity                                    |
| GO:0060589 | HUMAN HGNC=871 UniProtKB=Q9UII2HUMAN HGNC=7803 UniProtKB=Q12986,HUMAN HGNC=29158 UniProtKB=Q9Y2G9,HUMAN HGNC=10774 UniProtKB=P23246,HUMAN HGNC=4719 UniProtKB=P16401,HUMAN HGNC=27146 UniProtKB=Q5TA31,HUMAN HGNC=1101 UniProtKB=P51587,HUMAN HGNC=29890 UniProtKB=Q86UT6,HUMAN HGNC=4861 UniProtKB=Q9NRZ9,HUMAN HGNC=28843 UniProtKB=Q9HC44,HUMAN HGNC=30747 UniProtKB=P61201,HUMAN HGNC=19246 UniProtKB=Q9NYB0,HUMAN HGNC=18411 UniProtKB=Q3KNW1,HUMAN HGNC=12347 UniProtKB=Q9Y4A5,HUMAN HGNC=25397 UniProtKB=Q6MZP7,HUMAN HGNC=20508 UniProtKB=Q8IUE6,HUMAN HGNC=3157 UniProtKB=Q92838,HUMAN HGNC=7446 UniProtKB=Q9Y4I5,HUMAN HGNC=20250 UniProtKB=Q96IF1,HUMAN HGNC=9275 UniProtKB=P35813,HUMAN HGNC=30140 UniProtKB=A7MCY6,HUMAN HGNC=16391 UniProtKB=Q9H257,HUMAN HGNC=16276 UniProtKB=Q9C035,HUMAN HGNC=4716 UniProtKB=P16403,HUMAN HGNC=9349 UniProtKB=Q9NQX1,HUMAN HGNC=4718 UniProtKB=P10412,HUMAN HGNC=1628 UniProtKB=P08571,HUMAN HGNC=12738 UniProtKB=Q969T9HUMAN HGNC=30032 UniProtKB=Q6VY07,HUMAN HGNC=3702 UniProtKB=Q13642,HUMAN HGNC=17643 UniProtKB=Q9HD26,HUMAN HGNC=492 UniProtKB=P16157HUMAN HGNC=8876 UniProtKB=P17858,HUMAN HGNC=418 UniProtKB=P09972,HUMAN HGNC=414 UniProtKB=P04075,HUMAN HGNC=8878 UniProtKB=Q01813 | transcription, DNA-templated                                                       |
| GO:0006351 |                                                                                                                                                                                                                                                                                                                                                                                                                                                                                                                                                                                                                                                                                                                                                                                                                                                                                                                                                                                                                                                                                                                                                                                                                                                |                                                                                    |
| GO:0044325 |                                                                                                                                                                                                                                                                                                                                                                                                                                                                                                                                                                                                                                                                                                                                                                                                                                                                                                                                                                                                                                                                                                                                                                                                                                                | ion channel binding                                                                |
| GO:0004332 |                                                                                                                                                                                                                                                                                                                                                                                                                                                                                                                                                                                                                                                                                                                                                                                                                                                                                                                                                                                                                                                                                                                                                                                                                                                | fructose-bisphosphate<br>aldolase activity                                         |
| GO:0019439 | HUMAN HGNC=2689 UniProtKB=P09172,HUMAN HGNC=82 UniProtKB=P09110HUMAN HGNC=362 UniProtKB=P54819,HUMAN HGNC=363 UniProtKB=P27144,HUMAN HGNC=361 UniProtKB=P00568,HUMAN HGNC=18170 UniProtKB=P30085,HUMAN HGNC=17376 UniProtKB=Q9UIJ7                                                                                                                                                                                                                                                                                                                                                                                                                                                                                                                                                                                                                                                                                                                                                                                                                                                                                                                                                                                                             | aromatic compound<br>catabolic process                                             |
| GO:0006163 |                                                                                                                                                                                                                                                                                                                                                                                                                                                                                                                                                                                                                                                                                                                                                                                                                                                                                                                                                                                                                                                                                                                                                                                                                                                | purine nucleotide metabolic<br>process                                             |
| PC00246    | HUMAN HGNC=3815 UniProtKB=Q12951                                                                                                                                                                                                                                                                                                                                                                                                                                                                                                                                                                                                                                                                                                                                                                                                                                                                                                                                                                                                                                                                                                                                                                                                               | winged helix/forkhead<br>transcription factor                                      |

|           |   |                                                                                                                                                                                                                                                                                                                                                                                                                                                                                                                                                                                                                                                                                                                                                                                                                                                                                                                                                                                                                                            |                                                                                                                    |
|-----------|---|--------------------------------------------------------------------------------------------------------------------------------------------------------------------------------------------------------------------------------------------------------------------------------------------------------------------------------------------------------------------------------------------------------------------------------------------------------------------------------------------------------------------------------------------------------------------------------------------------------------------------------------------------------------------------------------------------------------------------------------------------------------------------------------------------------------------------------------------------------------------------------------------------------------------------------------------------------------------------------------------------------------------------------------------|--------------------------------------------------------------------------------------------------------------------|
| GO:003049 | 6 | HUMAN   HGNC=22931   UniProtKB=Q9P2N7                                                                                                                                                                                                                                                                                                                                                                                                                                                                                                                                                                                                                                                                                                                                                                                                                                                                                                                                                                                                      | midbody<br>regulation of<br>neurotransmitter receptor<br>activity                                                  |
| GO:009960 | 1 | HUMAN   HGNC=2905   UniProtKB=O14490                                                                                                                                                                                                                                                                                                                                                                                                                                                                                                                                                                                                                                                                                                                                                                                                                                                                                                                                                                                                       |                                                                                                                    |
| GO:004207 | 3 | HUMAN   HGNC=30391   UniProtKB=Q9UG01, HUMAN   HGNC=14313   UniProtKB=Q8WYA0                                                                                                                                                                                                                                                                                                                                                                                                                                                                                                                                                                                                                                                                                                                                                                                                                                                                                                                                                               | intraciliary transport                                                                                             |
|           |   | HUMAN   HGNC=9935   UniProtKB=Q14257, HUMAN   HGNC=12666   UniProtKB=P55072, HUMAN   HGNC=9411   UniProtKB=P14314, HUMAN   HGNC=17943   UniProtKB=Q9GZP9, HUMAN   HGNC=463   UniProtKB=Q9UKV5, HUMAN   HGNC=17059   UniProtKB=Q9NTJ5, HUMAN   HGNC=1458   UniProtKB=O43852, HUMAN   HGNC=13529   UniProtKB=Q9Y2B0, HUMAN   HGNC=16998   UniProtKB=P49755, HUMAN   HGNC=25541   UniProtKB=P57088, HUMAN   HGNC=16695   UniProtKB=P51572, HUMAN   HGNC=10996   UniProtKB=O14975, HUMAN   HGNC=30167   UniProtKB=P13667, HUMAN   HGNC=2479   UniProtKB=O76096, HUMAN   HGNC=16268   UniProtKB=Q8IY17, HUMAN   HGNC=15461   UniProtKB=P55145, HUMAN   HGNC=21354   UniProtKB=Q86XR7, HUMAN   HGNC=24251   UniProtKB=Q9Y3A6, HUMAN   HGNC=8548   UniProtKB=P07237, HUMAN   HGNC=1546   UniProtKB=P50454, HUMAN   HGNC=20175   UniProtKB=Q9Y3E0, HUMAN   HGNC=4606   UniProtKB=P30101, HUMAN   HGNC=8504   UniProtKB=Q969R2, HUMAN   HGNC=15663   UniProtKB=Q9NYU2, HUMAN   HGNC=16996   UniProtKB=Q15363, HUMAN   HGNC=24878   UniProtKB=Q9BVK6 | endoplasmic reticulum<br>RNA phosphodiester bond<br>hydrolysis<br>cellular response to steroid<br>hormone stimulus |
| GO:000578 | 3 | HUMAN   HGNC=8087   UniProtKB=P29728                                                                                                                                                                                                                                                                                                                                                                                                                                                                                                                                                                                                                                                                                                                                                                                                                                                                                                                                                                                                       |                                                                                                                    |
| GO:009050 | 1 | HUMAN   HGNC=533   UniProtKB=P04083                                                                                                                                                                                                                                                                                                                                                                                                                                                                                                                                                                                                                                                                                                                                                                                                                                                                                                                                                                                                        |                                                                                                                    |
| GO:007138 | 3 | HUMAN   HGNC=15476   UniProtKB=P63167, HUMAN   HGNC=15848   UniProtKB=Q14141, HUMAN   HGNC=16053   UniProtKB=Q8N1V2, HUMAN   HGNC=20908   UniProtKB=Q86YF9, HUMAN   HGNC=2952   UniProtKB=Q96JB1, HUMAN   HGNC=25631   UniProtKB=Q96MT7, HUMAN   HGNC=1717   UniProtKB=Q16181, HUMAN   HGNC=3244   UniProtKB=Q9NZN3, HUMAN   HGNC=29262   UniProtKB=Q9P2H3, HUMAN   HGNC=7729   UniProtKB=Q15019                                                                                                                                                                                                                                                                                                                                                                                                                                                                                                                                                                                                                                           | protein localization to cilium<br>cellular amino acid<br>biosynthetic process                                      |
| GO:006151 | 2 | HUMAN   HGNC=746   UniProtKB=P04424                                                                                                                                                                                                                                                                                                                                                                                                                                                                                                                                                                                                                                                                                                                                                                                                                                                                                                                                                                                                        |                                                                                                                    |
| GO:000865 | 2 | HUMAN   HGNC=11138   UniProtKB=P37840                                                                                                                                                                                                                                                                                                                                                                                                                                                                                                                                                                                                                                                                                                                                                                                                                                                                                                                                                                                                      | axon terminus                                                                                                      |
| GO:004367 | 9 | HUMAN   HGNC=16051   UniProtKB=Q8TEW0, HUMAN   HGNC=2067   UniProtKB=O00151, HUMAN   HGNC=15902   UniProtKB=Q8IXH8, HUMAN   HGNC=17468   UniProtKB=Q96HC4, HUMAN   HGNC=243   UniProtKB=P35611, HUMAN   HGNC=6207   UniProtKB=P14923, HUMAN   HGNC=14265   UniProtKB=Q86UP0, HUMAN   HGNC=19194   UniProtKB=Q96RW7, HUMAN   HGNC=22958   UniProtKB=Q9NR12, HUMAN   HGNC=20250   UniProtKB=Q96IF1, HUMAN   HGNC=30377   UniProtKB=Q14160                                                                                                                                                                                                                                                                                                                                                                                                                                                                                                                                                                                                    | adherens junction<br>plasma membrane<br>organization<br>Golgi to plasma membrane<br>transport                      |
| GO:000591 | 2 | HUMAN   HGNC=544   UniProtKB=P08133, HUMAN   HGNC=8515   UniProtKB=Q9HC10                                                                                                                                                                                                                                                                                                                                                                                                                                                                                                                                                                                                                                                                                                                                                                                                                                                                                                                                                                  |                                                                                                                    |
| GO:000700 | 9 | HUMAN   HGNC=30389   UniProtKB=Q96A65                                                                                                                                                                                                                                                                                                                                                                                                                                                                                                                                                                                                                                                                                                                                                                                                                                                                                                                                                                                                      | tissue development                                                                                                 |
| GO:000689 | 3 | HUMAN   HGNC=12601   UniProtKB=O75445, HUMAN   HGNC=885   UniProtKB=O75882                                                                                                                                                                                                                                                                                                                                                                                                                                                                                                                                                                                                                                                                                                                                                                                                                                                                                                                                                                 |                                                                                                                    |
| GO:000988 | 8 |                                                                                                                                                                                                                                                                                                                                                                                                                                                                                                                                                                                                                                                                                                                                                                                                                                                                                                                                                                                                                                            |                                                                                                                    |

|           |                                                       |                                                                                                                                                                                             |
|-----------|-------------------------------------------------------|---------------------------------------------------------------------------------------------------------------------------------------------------------------------------------------------|
| GO:001827 | HUMAN HGNC=10381 UniProtKB=P04843,HUMAN HGNC=2728     | protein N-linked<br>glycosylation via asparagine<br>movement of cell or<br>subcellular component                                                                                            |
| 9         | UniProtKB=P39656,HUMAN HGNC=15663 UniProtKB=Q9NYU2    |                                                                                                                                                                                             |
| GO:000692 |                                                       |                                                                                                                                                                                             |
| 8         | HUMAN HGNC=12736 UniProtKB=O43516                     |                                                                                                                                                                                             |
| GO:190121 |                                                       |                                                                                                                                                                                             |
| 4         | HUMAN HGNC=11138 UniProtKB=P37840                     | regulation of neuron death<br>intermediate filament<br>cytoskeleton organization                                                                                                            |
| GO:004510 | HUMAN HGNC=1090 UniProtKB=Q03001,HUMAN HGNC=9069 U    |                                                                                                                                                                                             |
| 4         | niProtKB=Q15149                                       |                                                                                                                                                                                             |
|           | HUMAN HGNC=537 UniProtKB=P07355,HUMAN HGNC=8044 Uni   |                                                                                                                                                                                             |
|           | ProtKB=P80303,HUMAN HGNC=12022 UniProtKB=P13693,HUMA  |                                                                                                                                                                                             |
|           | N HGNC=9935 UniProtKB=Q14257,HUMAN HGNC=545 UniProtK  |                                                                                                                                                                                             |
|           | B=P20073,HUMAN HGNC=3048 UniProtKB=Q02413,HUMAN HGN   |                                                                                                                                                                                             |
|           | C=1455 UniProtKB=P27797,HUMAN HGNC=533 UniProtKB=P040 |                                                                                                                                                                                             |
|           | 83,HUMAN HGNC=1449 UniProtKB=PODP25,HUMAN HGNC=1473   |                                                                                                                                                                                             |
|           | UniProtKB=P27824,HUMAN HGNC=11219 UniProtKB=P09486,HU |                                                                                                                                                                                             |
|           | MAN HGNC=535 UniProtKB=P50995,HUMAN HGNC=15902 UniPr  |                                                                                                                                                                                             |
|           | otKB=Q8IXH8,HUMAN HGNC=1458 UniProtKB=O43852,HUMAN    |                                                                                                                                                                                             |
|           | HGNC=11510 UniProtKB=Q8N9IO,HUMAN HGNC=544 UniProtKB= |                                                                                                                                                                                             |
|           | P08133,HUMAN HGNC=14265 UniProtKB=Q86UP0,HUMAN HGN    |                                                                                                                                                                                             |
|           | C=1452 UniProtKB=P27482,HUMAN HGNC=11512 UniProtKB=Q9 |                                                                                                                                                                                             |
| GO:000550 | H2B2,HUMAN HGNC=8515 UniProtKB=Q9HC10,HUMAN HGNC=8    | calcium ion binding<br>phospholipase C-activating<br>G protein-coupled receptor<br>signaling pathway<br>integral component of<br>peroxisomal membrane<br>long-chain fatty acid<br>transport |
| 9         | 043 UniProtKB=Q02818,HUMAN HGNC=543 UniProtKB=P08758  |                                                                                                                                                                                             |
|           | HUMAN HGNC=3537 UniProtKB=P25116,HUMAN HGNC=4472 U    |                                                                                                                                                                                             |
| GO:000720 | niProtKB=Q14330,HUMAN HGNC=4390 UniProtKB=P50148,HUMA |                                                                                                                                                                                             |
| 0         | N HGNC=3540 UniProtKB=Q96RIO                          |                                                                                                                                                                                             |
| GO:000577 |                                                       |                                                                                                                                                                                             |
| 9         | HUMAN HGNC=21689 UniProtKB=Q9Y3D6                     |                                                                                                                                                                                             |
| GO:001590 |                                                       |                                                                                                                                                                                             |
| 9         | HUMAN HGNC=533 UniProtKB=P04083                       |                                                                                                                                                                                             |
| GO:004825 |                                                       |                                                                                                                                                                                             |
| 9         | HUMAN HGNC=3757 UniProtKB=O75955                      |                                                                                                                                                                                             |
| GO:003476 |                                                       |                                                                                                                                                                                             |
| 5         | HUMAN HGNC=16804 UniProtKB=O00308                     | regulation of receptor-<br>mediated endocytosis<br>regulation of ion<br>transmembrane transport                                                                                             |
|           | HUMAN HGNC=24552 UniProtKB=Q3LXA3,HUMAN HGNC=12009    |                                                                                                                                                                                             |
|           | UniProtKB=P60174,HUMAN HGNC=9723 UniProtKB=P11216,HU  |                                                                                                                                                                                             |
| GO:004427 | MAN HGNC=8891 UniProtKB=P52209,HUMAN HGNC=9725 UniPr  |                                                                                                                                                                                             |
| 5         | otKB=P06737                                           | cellular carbohydrate<br>catabolic process                                                                                                                                                  |
| GO:001062 | HUMAN HGNC=2479 UniProtKB=O76096,HUMAN HGNC=9583 U    | negative regulation of gene<br>expression                                                                                                                                                   |
| 9         | niProtKB=P26599                                       |                                                                                                                                                                                             |
| GO:004247 | HUMAN HGNC=9772 UniProtKB=Q13637,HUMAN HGNC=9767 U    |                                                                                                                                                                                             |
| 0         | niProtKB=O00194                                       |                                                                                                                                                                                             |
| GO:000268 |                                                       |                                                                                                                                                                                             |
| 2         | HUMAN HGNC=8993 UniProtKB=P12273                      | melanosome<br>regulation of immune<br>system process                                                                                                                                        |
| GO:000367 |                                                       |                                                                                                                                                                                             |
| 6         | HUMAN HGNC=14959 UniProtKB=Q96T37                     |                                                                                                                                                                                             |
| GO:001989 | HUMAN HGNC=20040 UniProtKB=Q01518,HUMAN HGNC=871 U    | nucleic acid binding                                                                                                                                                                        |
| 9         | niProtKB=Q9UII2                                       |                                                                                                                                                                                             |
|           | HUMAN HGNC=25364 UniProtKB=Q9H0R4,HUMAN HGNC=17059    | enzyme binding                                                                                                                                                                              |
|           | UniProtKB=Q9NTJ5,HUMAN HGNC=6050 UniProtKB=P29218,HU  |                                                                                                                                                                                             |
| PC00181   | MAN HGNC=10542 UniProtKB=O95248                       | phosphatase                                                                                                                                                                                 |
| GO:000640 | HUMAN HGNC=8062 UniProtKB=P49790,HUMAN HGNC=17859     |                                                                                                                                                                                             |
| 5         | UniProtKB=Q5SRE5                                      |                                                                                                                                                                                             |
| GO:000090 | HUMAN HGNC=18756 UniProtKB=Q9BYZ6,HUMAN HGNC=20040    | RNA export from nucleus                                                                                                                                                                     |
| 2         | UniProtKB=Q01518,HUMAN HGNC=13759 UniProtKB=Q7L576,H  | cell morphogenesis                                                                                                                                                                          |

|            |                                                                                                                                                                                                                                                                                                                                                                                                                                                                                                                                                                                                                                                                                                                                                                                                                                                                                                                                                                                                                                                                                                                                                                                                                                                                                                                                                                                                                                                                                                                                                                                                                                                                                                                                                                                                             |                                                |
|------------|-------------------------------------------------------------------------------------------------------------------------------------------------------------------------------------------------------------------------------------------------------------------------------------------------------------------------------------------------------------------------------------------------------------------------------------------------------------------------------------------------------------------------------------------------------------------------------------------------------------------------------------------------------------------------------------------------------------------------------------------------------------------------------------------------------------------------------------------------------------------------------------------------------------------------------------------------------------------------------------------------------------------------------------------------------------------------------------------------------------------------------------------------------------------------------------------------------------------------------------------------------------------------------------------------------------------------------------------------------------------------------------------------------------------------------------------------------------------------------------------------------------------------------------------------------------------------------------------------------------------------------------------------------------------------------------------------------------------------------------------------------------------------------------------------------------|------------------------------------------------|
|            | UMAN HGNC=15902 UniProtKB=Q8IXH8,HUMAN HGNC=533 UniProtKB=P04083,HUMAN HGNC=14265 UniProtKB=Q86UP0,HUMAN HGNC=1491 UniProtKB=P47756                                                                                                                                                                                                                                                                                                                                                                                                                                                                                                                                                                                                                                                                                                                                                                                                                                                                                                                                                                                                                                                                                                                                                                                                                                                                                                                                                                                                                                                                                                                                                                                                                                                                         |                                                |
| GO:0005688 | HUMAN HGNC=20471 UniProtKB=O95777,HUMAN HGNC=17259 UniProtKB=Q9Y4Z0                                                                                                                                                                                                                                                                                                                                                                                                                                                                                                                                                                                                                                                                                                                                                                                                                                                                                                                                                                                                                                                                                                                                                                                                                                                                                                                                                                                                                                                                                                                                                                                                                                                                                                                                         | U6 snRNP                                       |
| GO:0042327 | HUMAN HGNC=8898 UniProtKB=P07205<br>HUMAN HGNC=9535 UniProtKB=P60900,HUMAN HGNC=9533 UniProtKB=P25789,HUMAN HGNC=9536 UniProtKB=O14818,HUMAN HGNC=9530 UniProtKB=P25786,HUMAN HGNC=9532 UniProtKB=P25788,HUMAN HGNC=9531 UniProtKB=P25787                                                                                                                                                                                                                                                                                                                                                                                                                                                                                                                                                                                                                                                                                                                                                                                                                                                                                                                                                                                                                                                                                                                                                                                                                                                                                                                                                                                                                                                                                                                                                                   | positive regulation of phosphorylation         |
| GO:0019773 | HUMAN HGNC=7127 UniProtKB=P40692,HUMAN HGNC=7326 UniProtKB=P20585                                                                                                                                                                                                                                                                                                                                                                                                                                                                                                                                                                                                                                                                                                                                                                                                                                                                                                                                                                                                                                                                                                                                                                                                                                                                                                                                                                                                                                                                                                                                                                                                                                                                                                                                           | proteasome core complex, alpha-subunit complex |
| GO:0006298 | HUMAN HGNC=11124 UniProtKB=P55854,HUMAN HGNC=11125 UniProtKB=P61956                                                                                                                                                                                                                                                                                                                                                                                                                                                                                                                                                                                                                                                                                                                                                                                                                                                                                                                                                                                                                                                                                                                                                                                                                                                                                                                                                                                                                                                                                                                                                                                                                                                                                                                                         | mismatch repair                                |
| GO:0044389 |                                                                                                                                                                                                                                                                                                                                                                                                                                                                                                                                                                                                                                                                                                                                                                                                                                                                                                                                                                                                                                                                                                                                                                                                                                                                                                                                                                                                                                                                                                                                                                                                                                                                                                                                                                                                             | ubiquitin-like protein ligase binding          |
| GO:0033522 | HUMAN HGNC=23077 UniProtKB=Q96FW1<br>HUMAN HGNC=5753 UniProtKB=P01593,HUMAN HGNC=5879 UniProtKB=P01699,HUMAN HGNC=5825 UniProtKB=A0A0C4DH25,HUMAN HGNC=5800 UniProtKB=A0A075B6S2,HUMAN HGNC=5742 UniProtKB=A0A0C4DH72,HUMAN HGNC=5816 UniProtKB=P01624,HUMAN Gene=KV311_HUMAN UniProtKB=P04433,HUMAN HGNC=2444 UniProtKB=P41240,HUMAN HGNC=5910 UniProtKB=P01718,HUMAN HGNC=5931 UniProtKB=A0A075B6I0,HUMAN HGNC=5933 UniProtKB=A0A0B4J1Y8,HUMAN HGNC=5877 UniProtKB=P01703,HUMAN HGNC=5834 UniProtKB=P06312,HUMAN HGNC=5890 UniProtKB=P01705,HUMAN HGNC=5732 UniProtKB=P04430,HUMAN HGNC=5759 UniProtKB=A0A087WSZ0,HUMAN HGNC=5733 UniProtKB=P01599,HUMAN HGNC=5888 UniProtKB=P01704,HUMAN HGNC=3309 UniProtKB=P08246,HUMAN HGNC=5927 UniProtKB=P01721,HUMAN HGNC=5897 UniProtKB=A0A075B6K4,HUMAN HGNC=5918 UniProtKB=A0A075B6K5,HUMAN HGNC=5781 UniProtKB=A0A0C4DH68,HUMAN HGNC=5930 UniProtKB=A0A075B6I9,HUMAN HGNC=5901 UniProtKB=A0A075B6K0,HUMAN HGNC=5743 UniProtKB=A0A0C4DH67,HUMAN HGNC=5739 UniProtKB=A0A075B6S9,HUMAN HGNC=5880 UniProtKB=P01700,HUMAN HGNC=5905 UniProtKB=P80748,HUMAN HGNC=5756 UniProtKB=P04432,HUMAN HGNC=5896 UniProtKB=P01715,HUMAN HGNC=910 UniProtKB=P25311,HUMAN HGNC=5735 UniProtKB=A0A075B6S5,HUMAN HGNC=5785 UniProtKB=P06310,HUMAN HGNC=5836 UniProtKB=A0A0C4DH24,HUMAN HGNC=5895 UniProtKB=P01709,HUMAN HGNC=5898 UniProtKB=A0A075B6K2,HUMAN HGNC=5887 UniProtKB=P01706,HUMAN HGNC=5929 UniProtKB=P04211,HUMAN HGNC=5882 UniProtKB=P01701,HUMAN HGNC=5908 UniProtKB=P01717,HUMAN HGNC=5746 UniProtKB=P01611,HUMAN HGNC=5821 UniProtKB=A0A075B6H7,HUMAN HGNC=4036 UniProtKB=O15117,HUMAN HGNC=5889 UniProtKB=A0A075B6J9,HUMAN HGNC=5741 UniProtKB=P01602,HUMAN HGNC=5730 UniProtKB=A0A0C4DH73,HUMAN HGNC=5817 UniProtKB=P01619,HUMAN HGNC=5783 UniProtKB=A0A075B6P5 | histone H2A ubiquitination                     |
| GO:0006955 | HUMAN HGNC=11510 UniProtKB=Q8N9I0,HUMAN HGNC=11512 UniProtKB=Q9H2B2                                                                                                                                                                                                                                                                                                                                                                                                                                                                                                                                                                                                                                                                                                                                                                                                                                                                                                                                                                                                                                                                                                                                                                                                                                                                                                                                                                                                                                                                                                                                                                                                                                                                                                                                         | immune response                                |
| GO:0010646 | HUMAN HGNC=18233 UniProtKB=Q8NDB2,HUMAN HGNC=6091 UniProtKB=P06213                                                                                                                                                                                                                                                                                                                                                                                                                                                                                                                                                                                                                                                                                                                                                                                                                                                                                                                                                                                                                                                                                                                                                                                                                                                                                                                                                                                                                                                                                                                                                                                                                                                                                                                                          | regulation of cell communication               |
| GO:0043491 |                                                                                                                                                                                                                                                                                                                                                                                                                                                                                                                                                                                                                                                                                                                                                                                                                                                                                                                                                                                                                                                                                                                                                                                                                                                                                                                                                                                                                                                                                                                                                                                                                                                                                                                                                                                                             | protein kinase B signaling                     |

|            |                                                                                                                                                                                                                                                                                                                                                                                                                                                                                                                                                                                                                                                                                                               |                                        |
|------------|---------------------------------------------------------------------------------------------------------------------------------------------------------------------------------------------------------------------------------------------------------------------------------------------------------------------------------------------------------------------------------------------------------------------------------------------------------------------------------------------------------------------------------------------------------------------------------------------------------------------------------------------------------------------------------------------------------------|----------------------------------------|
| GO:0003682 | HUMAN HGNC=5048 UniProtKB=Q00839,HUMAN HGNC=10760 UniProtKB=Q01105,HUMAN HGNC=7640 UniProtKB=Q99733,HUMAN HGNC=4861 UniProtKB=Q9NRZ9,HUMAN HGNC=42937 UniProtKB=P0DME0,HUMAN HGNC=7910 UniProtKB=P06748,HUMAN HGNC=24358 UniProtKB=Q9H2G4                                                                                                                                                                                                                                                                                                                                                                                                                                                                     | chromatin binding                      |
| GO:0021915 | HUMAN HGNC=12652 UniProtKB=P50552                                                                                                                                                                                                                                                                                                                                                                                                                                                                                                                                                                                                                                                                             | neural tube development                |
| GO:0004180 | HUMAN HGNC=25648 UniProtKB=Q8N5J2,HUMAN HGNC=15722 UniProtKB=Q8WXQ8,HUMAN HGNC=2300 UniProtKB=Q96IY4,HUMAN HGNC=11763 UniProtKB=P02786,HUMAN HGNC=2312 UniProtKB=P15169                                                                                                                                                                                                                                                                                                                                                                                                                                                                                                                                       | carboxypeptidase activity              |
| GO:0022625 | HUMAN HGNC=10372 UniProtKB=P05386,HUMAN HGNC=10363 UniProtKB=P18124,HUMAN HGNC=10305 UniProtKB=P50914,HUMAN HGNC=10353 UniProtKB=P36578                                                                                                                                                                                                                                                                                                                                                                                                                                                                                                                                                                       | cytosolic large ribosomal subunit      |
| PC00031    | HUMAN HGNC=8648 UniProtKB=Q15366,HUMAN HGNC=19071 UniProtKB=Q86V81,HUMAN HGNC=29190 UniProtKB=Q9UPQ9,HUMAN HGNC=14959 UniProtKB=Q96T37,HUMAN HGNC=10774 UniProtKB=P23246,HUMAN HGNC=17150 UniProtKB=Q9Y2V2,HUMAN HGNC=117 UniProtKB=P21399,HUMAN HGNC=29531 UniProtKB=Q6PKG0,HUMAN HGNC=8647 UniProtKB=Q15365,HUMAN HGNC=226 UniProtKB=P78563,HUMAN HGNC=5044 UniProtKB=P61978,HUMAN HGNC=6038 UniProtKB=Q12906,HUMAN HGNC=17860 UniProtKB=Q8NC51,HUMAN HGNC=24903 UniProtKB=Q9Y520,HUMAN HGNC=19072 UniProtKB=Q96J01                                                                                                                                                                                         | RNA metabolism protein                 |
| GO:0016324 | HUMAN HGNC=16051 UniProtKB=Q8TEW0,HUMAN HGNC=29327 UniProtKB=Q5VZ46,HUMAN HGNC=29953 UniProtKB=Q8WWZ8,HUMAN HGNC=11075 UniProtKB=O14745                                                                                                                                                                                                                                                                                                                                                                                                                                                                                                                                                                       | apical plasma membrane                 |
| PC00241    | HUMAN HGNC=1406 UniProtKB=Q9Y698,HUMAN HGNC=12669 UniProtKB=P21796,HUMAN HGNC=12674 UniProtKB=Q9Y277,HUMAN HGNC=12672 UniProtKB=P45880,HUMAN HGNC=10594 UniProtKB=Q01118,HUMAN HGNC=10582 UniProtKB=Q9Y5Y9,HUMAN HGNC=1393 UniProtKB=O60840                                                                                                                                                                                                                                                                                                                                                                                                                                                                   | voltage-gated ion channel              |
| GO:0016887 | HUMAN HGNC=800 UniProtKB=P50993,HUMAN HGNC=2949 UniProtKB=Q8TD57,HUMAN HGNC=7127 UniProtKB=P40692,HUMAN HGNC=5239 UniProtKB=P17066,HUMAN HGNC=12666 UniProtKB=P55072,HUMAN HGNC=813 UniProtKB=Q93084,HUMAN HGNC=14637 UniProtKB=Q86UK0,HUMAN HGNC=823 UniProtKB=P25705,HUMAN HGNC=8016 UniProtKB=P46459,HUMAN HGNC=5241 UniProtKB=P11142,HUMAN HGNC=2951 UniProtKB=Q9C0G6,HUMAN HGNC=2952 UniProtKB=Q96JB1,HUMAN HGNC=871 UniProtKB=Q9UII2,HUMAN HGNC=55 UniProtKB=O15439,HUMAN HGNC=5238 UniProtKB=P11021,HUMAN HGNC=5240 UniProtKB=P48741,HUMAN HGNC=851 UniProtKB=P38606,HUMAN HGNC=806 UniProtKB=P54709,HUMAN HGNC=13531 UniProtKB=Q9Y2Q0,HUMAN HGNC=830 UniProtKB=P06576,HUMAN HGNC=812 UniProtKB=P16615 | ATPase activity                        |
| GO:0007399 | HUMAN HGNC=3778 UniProtKB=P02751,HUMAN HGNC=4243 UniProtKB=P56159,HUMAN HGNC=4244 UniProtKB=O00451                                                                                                                                                                                                                                                                                                                                                                                                                                                                                                                                                                                                            | nervous system development             |
| GO:0070971 | HUMAN HGNC=10534 UniProtKB=Q9NR31,HUMAN HGNC=10701 UniProtKB=Q15436                                                                                                                                                                                                                                                                                                                                                                                                                                                                                                                                                                                                                                           | endoplasmic reticulum exit site        |
| GO:0140030 | HUMAN HGNC=20635 UniProtKB=Q14997                                                                                                                                                                                                                                                                                                                                                                                                                                                                                                                                                                                                                                                                             | modification-dependent protein binding |

|            |                                                                                                                                                                                                                                                                                                                                                                                                                                                                                                                                                                                                                                             |                                                      |
|------------|---------------------------------------------------------------------------------------------------------------------------------------------------------------------------------------------------------------------------------------------------------------------------------------------------------------------------------------------------------------------------------------------------------------------------------------------------------------------------------------------------------------------------------------------------------------------------------------------------------------------------------------------|------------------------------------------------------|
| GO:0005793 | HUMAN HGNC=8044 UniProtKB=P80303,HUMAN HGNC=21354 UniProtKB=Q86XR7,HUMAN HGNC=24251 UniProtKB=Q9Y3A6,HUMAN HGNC=6631 UniProtKB=P49257,HUMAN HGNC=16998 UniProtKB=P49755,HUMAN HGNC=16996 UniProtKB=Q15363,HUMAN HGNC=8043 UniProtKB=Q02818,HUMAN HGNC=24878 UniProtKB=Q9BVK6                                                                                                                                                                                                                                                                                                                                                                | endoplasmic reticulum-Golgi intermediate compartment |
| GO:0017134 | HUMAN HGNC=15527 UniProtKB=Q86Z14                                                                                                                                                                                                                                                                                                                                                                                                                                                                                                                                                                                                           | fibroblast growth factor binding                     |
| GO:0051536 | HUMAN HGNC=3951 UniProtKB=Q16595                                                                                                                                                                                                                                                                                                                                                                                                                                                                                                                                                                                                            | iron-sulfur cluster binding                          |
| GO:0044877 | HUMAN HGNC=4395 UniProtKB=P19086,HUMAN HGNC=11424 UniProtKB=O43815,HUMAN HGNC=4384 UniProtKB=P63096,HUMAN HGNC=12733 UniProtKB=Q9Y6W5,HUMAN HGNC=4387 UniProtKB=P08754,HUMAN HGNC=4374 UniProtKB=O60234,HUMAN HGNC=4385 UniProtKB=P04899,HUMAN HGNC=4390 UniProtKB=P50148,HUMAN HGNC=492 UniProtKB=P16157,HUMAN HGNC=15720 UniProtKB=Q13033,HUMAN HGNC=4381 UniProtKB=Q14344,HUMAN HGNC=4393 UniProtKB=P11488,HUMAN HGNC=8515 UniProtKB=Q9HC10                                                                                                                                                                                              | protein-containing complex binding                   |
| GO:0019955 | HUMAN HGNC=1681 UniProtKB=P16070,HUMAN HGNC=19100 UniProtKB=Q5VWK5                                                                                                                                                                                                                                                                                                                                                                                                                                                                                                                                                                          | cytokine binding                                     |
| GO:0004623 | HUMAN HGNC=533 UniProtKB=P04083                                                                                                                                                                                                                                                                                                                                                                                                                                                                                                                                                                                                             | phospholipase A2 activity                            |
| PC00179    | HUMAN HGNC=3964 UniProtKB=P01225,HUMAN HGNC=16452 UniProtKB=P0DN86,HUMAN HGNC=16721 UniProtKB=A6NKQ9                                                                                                                                                                                                                                                                                                                                                                                                                                                                                                                                        | peptide hormone                                      |
| GO:0034622 | HUMAN HGNC=7641 UniProtKB=P54920,HUMAN HGNC=4926 UniProtKB=O15212,HUMAN HGNC=12644 UniProtKB=Q15836,HUMAN HGNC=11582 UniProtKB=Q15813,HUMAN HGNC=11131 UniProtKB=O00161,HUMAN HGNC=12647 UniProtKB=Q9BV40,HUMAN HGNC=2092 UniProtKB=Q00610,HUMAN HGNC=2288 UniProtKB=P14406,HUMAN HGNC=2090 UniProtKB=P09496,HUMAN HGNC=8515 UniProtKB=Q9HC10,HUMAN HGNC=11579 UniProtKB=O75347                                                                                                                                                                                                                                                             | cellular protein-containing complex assembly         |
| GO:0005938 | HUMAN HGNC=16051 UniProtKB=Q8TEW0,HUMAN HGNC=15848 UniProtKB=Q14141,HUMAN HGNC=18756 UniProtKB=Q9BYZ6,HUMAN HGNC=9802 UniProtKB=P15153,HUMAN HGNC=9164 UniProtKB=Q99719,HUMAN HGNC=1717 UniProtKB=Q16181,HUMAN HGNC=29327 UniProtKB=Q5VZ46,HUMAN HGNC=9801 UniProtKB=P63000,HUMAN HGNC=2090 UniProtKB=P09496,HUMAN HGNC=7729 UniProtKB=Q15019                                                                                                                                                                                                                                                                                               | cell cortex                                          |
| GO:0006206 | HUMAN HGNC=2520 UniProtKB=Q9NRF8                                                                                                                                                                                                                                                                                                                                                                                                                                                                                                                                                                                                            | pyrimidine nucleobase metabolic process              |
| PC00197    | HUMAN HGNC=4045 UniProtKB=O75084,HUMAN HGNC=4439 UniProtKB=P07359,HUMAN HGNC=7821 UniProtKB=P14543,HUMAN HGNC=5468 UniProtKB=P35858,HUMAN HGNC=19100 UniProtKB=Q5VWK5,HUMAN HGNC=4244 UniProtKB=O00451,HUMAN HGNC=29953 UniProtKB=Q8WWZ8,HUMAN HGNC=11119 UniProtKB=Q99835,HUMAN HGNC=16089 UniProtKB=O15173,HUMAN HGNC=1681 UniProtKB=P16070,HUMAN HGNC=4243 UniProtKB=P56159,HUMAN HGNC=10661 UniProtKB=P31431,HUMAN HGNC=10608 UniProtKB=P47872,HUMAN HGNC=13937 UniProtKB=Q95866,HUMAN HGNC=19296 UniProtKB=Q9UF33,HUMAN HGNC=16090 UniProtKB=O00264,HUMAN HGNC=1628 UniProtKB=P08571,HUMAN HGNC=16768 UniProtKB=O60391,HUMAN HGNC=2313 | transmembrane signal receptor                        |

|            |                                                                                                                                                                                                                                                                                                                                                                                                                                                                                                                                                                                                                                                                                                                                                                                                                                                                                                    |                                                                                                                           |
|------------|----------------------------------------------------------------------------------------------------------------------------------------------------------------------------------------------------------------------------------------------------------------------------------------------------------------------------------------------------------------------------------------------------------------------------------------------------------------------------------------------------------------------------------------------------------------------------------------------------------------------------------------------------------------------------------------------------------------------------------------------------------------------------------------------------------------------------------------------------------------------------------------------------|---------------------------------------------------------------------------------------------------------------------------|
|            | UniProtKB=P22792,HUMAN   HGNC=30384   UniProtKB=Q9UMX5,HUMAN   HGNC=6091   UniProtKB=P06213                                                                                                                                                                                                                                                                                                                                                                                                                                                                                                                                                                                                                                                                                                                                                                                                        |                                                                                                                           |
| GO:0016042 | HUMAN   HGNC=607   UniProtKB=P02654,HUMAN   HGNC=108   UniProtKB=P22303                                                                                                                                                                                                                                                                                                                                                                                                                                                                                                                                                                                                                                                                                                                                                                                                                            | lipid catabolic process                                                                                                   |
| GO:0006469 | HUMAN   HGNC=19388   UniProtKB=P49593,HUMAN   HGNC=29884   UniProtKB=Q8TF42                                                                                                                                                                                                                                                                                                                                                                                                                                                                                                                                                                                                                                                                                                                                                                                                                        | negative regulation of protein kinase activity                                                                            |
|            | HUMAN   HGNC=20471   UniProtKB=O95777,HUMAN   HGNC=17821   UniProtKB=O00148,HUMAN   HGNC=9583   UniProtKB=P26599,HUMAN   HGNC=14959   UniProtKB=Q96T37,HUMAN   HGNC=5044   UniProtKB=P61978,HUMAN   HGNC=1743   UniProtKB=Q99459,HUMAN   HGNC=10774   UniProtKB=P23246,HUMAN   HGNC=24932   UniProtKB=Q9NZ63                                                                                                                                                                                                                                                                                                                                                                                                                                                                                                                                                                                       | mRNA splicing, via spliceosome                                                                                            |
| GO:0000398 | HUMAN   HGNC=6767   UniProtKB=Q15797,HUMAN   HGNC=3815   UniProtKB=Q12951                                                                                                                                                                                                                                                                                                                                                                                                                                                                                                                                                                                                                                                                                                                                                                                                                          | anatomical structure morphogenesis                                                                                        |
| GO:0046540 | HUMAN   HGNC=20471   UniProtKB=O95777                                                                                                                                                                                                                                                                                                                                                                                                                                                                                                                                                                                                                                                                                                                                                                                                                                                              | U4/U6 x U5 tri-snRNP complex                                                                                              |
|            | HUMAN   HGNC=9782   UniProtKB=P61018,HUMAN   HGNC=9785   UniProtKB=P51148,HUMAN   HGNC=9784   UniProtKB=P61020,HUMAN   HGNC=19760   UniProtKB=Q96T51                                                                                                                                                                                                                                                                                                                                                                                                                                                                                                                                                                                                                                                                                                                                               | regulation of endocytosis                                                                                                 |
| GO:0030100 |                                                                                                                                                                                                                                                                                                                                                                                                                                                                                                                                                                                                                                                                                                                                                                                                                                                                                                    |                                                                                                                           |
| GO:0051606 | HUMAN   HGNC=30013   UniProtKB=Q96PD5                                                                                                                                                                                                                                                                                                                                                                                                                                                                                                                                                                                                                                                                                                                                                                                                                                                              | detection of stimulus                                                                                                     |
| GO:0034551 | HUMAN   HGNC=12582   UniProtKB=P14927                                                                                                                                                                                                                                                                                                                                                                                                                                                                                                                                                                                                                                                                                                                                                                                                                                                              | mitochondrial respiratory chain complex III assembly                                                                      |
| GO:0070491 | HUMAN   HGNC=9349   UniProtKB=Q9NQX1                                                                                                                                                                                                                                                                                                                                                                                                                                                                                                                                                                                                                                                                                                                                                                                                                                                               | repressing transcription factor binding                                                                                   |
|            | HUMAN   HGNC=253   UniProtKB=P11766,HUMAN   HGNC=11179   UniProtKB=P00441,HUMAN   HGNC=9353   UniProtKB=P32119,HUMAN   HGNC=251   UniProtKB=P00326,HUMAN   HGNC=9352   UniProtKB=Q06830,HUMAN   HGNC=255   UniProtKB=P28332                                                                                                                                                                                                                                                                                                                                                                                                                                                                                                                                                                                                                                                                        | response to toxic substance                                                                                               |
| GO:0009636 |                                                                                                                                                                                                                                                                                                                                                                                                                                                                                                                                                                                                                                                                                                                                                                                                                                                                                                    | single-stranded DNA                                                                                                       |
| GO:0017116 | HUMAN   HGNC=17196   UniProtKB=Q8NG08                                                                                                                                                                                                                                                                                                                                                                                                                                                                                                                                                                                                                                                                                                                                                                                                                                                              | helicase activity                                                                                                         |
|            | HUMAN   HGNC=3338   UniProtKB=Q14247,HUMAN   HGNC=2695   UniProtKB=Q16643,HUMAN   HGNC=2696   UniProtKB=Q9UJU6,HUMAN   HGNC=4844   UniProtKB=P14317                                                                                                                                                                                                                                                                                                                                                                                                                                                                                                                                                                                                                                                                                                                                                | regulation of dendrite morphogenesis                                                                                      |
| GO:0048814 |                                                                                                                                                                                                                                                                                                                                                                                                                                                                                                                                                                                                                                                                                                                                                                                                                                                                                                    | oxidoreductase activity, acting on paired donors, with incorporation or reduction of molecular oxygen                     |
| GO:0016705 | HUMAN   HGNC=2689   UniProtKB=P09172                                                                                                                                                                                                                                                                                                                                                                                                                                                                                                                                                                                                                                                                                                                                                                                                                                                               |                                                                                                                           |
|            | HUMAN   HGNC=5575   UniProtKB=A0A0B4J1V2,HUMAN   HGNC=5645   UniProtKB=A0A0C4DH34,HUMAN   HGNC=5549   UniProtKB=A0A0C4DH31,HUMAN   HGNC=5554   UniProtKB=P01743,HUMAN   HGNC=5480   UniProtKB=P01880,HUMAN   HGNC=5659   UniProtKB=A0A0C4DH38,HUMAN   HGNC=5634   UniProtKB=A0A075B7F0,HUMAN   HGNC=38476   UniProtKB=B9A064,HUMAN   HGNC=5861   UniProtKB=A0M8Q6,HUMAN   HGNC=5647   UniProtKB=A0A087WSY4,HUMAN   HGNC=5563   UniProtKB=A0A075B7D0,HUMAN   HGNC=5856   UniProtKB=P0DOY2,HUMAN   HGNC=2367   UniProtKB=P02741,HUMAN   HGNC=5606   UniProtKB=P01763,HUMAN   HGNC=533   UniProtKB=P04083,HUMAN   HGNC=5576   UniProtKB=P01817,HUMAN   HGNC=5528   UniProtKB=P01861,HUMAN   HGNC=5541   UniProtKB=P01871,HUMAN   HGNC=5585   UniProtKB=A0A0C4DH32,HUMAN   HGNC=5551   UniProtKB=A0A0C4DH33,HUMAN   HGNC=5526   UniProtKB=P01859,HUMAN   HGNC=5657   UniProtKB=P0DP08,HUMAN   Ensembl= | adaptive immune response based on somatic recombination of immune receptors built from immunoglobulin superfamily domains |
| GO:0002460 |                                                                                                                                                                                                                                                                                                                                                                                                                                                                                                                                                                                                                                                                                                                                                                                                                                                                                                    |                                                                                                                           |

|            |                                                                                                                                                                                                                                                                                                                                                                                                                                                                                                                                                                                                                                                                                                                                                                                                                                                                                                                                                                                                                                                                                                                                                                                                                                                                                                                                                                      |                                                                                                                                                                              |
|------------|----------------------------------------------------------------------------------------------------------------------------------------------------------------------------------------------------------------------------------------------------------------------------------------------------------------------------------------------------------------------------------------------------------------------------------------------------------------------------------------------------------------------------------------------------------------------------------------------------------------------------------------------------------------------------------------------------------------------------------------------------------------------------------------------------------------------------------------------------------------------------------------------------------------------------------------------------------------------------------------------------------------------------------------------------------------------------------------------------------------------------------------------------------------------------------------------------------------------------------------------------------------------------------------------------------------------------------------------------------------------|------------------------------------------------------------------------------------------------------------------------------------------------------------------------------|
|            | ENSG00000282639 UniProtKB=A0A0J9YX35,HUMAN Gene=HV309_HUMAN UniProtKB=P01782,HUMAN HGNC=5654 UniProtKB=P01825,HUMAN HGNC=5553 UniProtKB=A0A0A0MS14,HUMAN Gene=HV108_HUMAN UniProtKB=P0DP01,HUMAN HGNC=5624 UniProtKB=A0A0B4J1X5,HUMAN HGNC=5620 UniProtKB=P01780,HUMAN HGNC=5598 UniProtKB=A0A0C4DH35,HUMAN HGNC=5580 UniProtKB=P01762,HUMAN HGNC=5633 UniProtKB=A0A075B7D8,HUMAN HGNC=5582 UniProtKB=A0A0B4J1V0,HUMAN HGNC=5478 UniProtKB=P01876,HUMAN HGNC=5617 UniProtKB=A0A075B6Q5,HUMAN HGNC=5594 UniProtKB=P0DP03,HUMAN HGNC=5655 UniProtKB=A0A0C4DH41,HUMAN HGNC=5636 UniProtKB=A0A075B7B8,HUMAN HGNC=5586 UniProtKB=A0A0B4J1V1,HUMAN HGNC=5581 UniProtKB=P01766,HUMAN HGNC=5622 UniProtKB=A0A0B4J1Y9,HUMAN HGNC=5652 UniProtKB=A0A075B6R2,HUMAN HGNC=5593 UniProtKB=P0DP02,HUMAN HGNC=5479 UniProtKB=P01877,HUMAN HGNC=5619 UniProtKB=A0A0C4DH42,HUMAN HGNC=5596 UniProtKB=P01772,HUMAN HGNC=5550 UniProtKB=P23083,HUMAN HGNC=5604 UniProtKB=A0A0B4J1X8,HUMAN HGNC=5525 UniProtKB=P01857,HUMAN HGNC=5662 UniProtKB=A0A0B4J1U7,HUMAN HGNC=16961 UniProtKB=Q15762,HUMAN HGNC=5601 UniProtKB=A0A0C4DH36,HUMAN HGNC=5716 UniProtKB=P01834,HUMAN HGNC=5588 UniProtKB=P01764,HUMAN HGNC=5857 UniProtKB=P0DOY3,HUMAN HGNC=5610 UniProtKB=P01767,HUMAN Ensembl=ENSG00000282150 UniProtKB=A0A0J9YY99,HUMAN HGNC=5527 UniProtKB=P01860,HUMAN HGNC=584 UniProtKB=P02743 |                                                                                                                                                                              |
| GO:0006164 | HUMAN HGNC=9465 UniProtKB=P11908,HUMAN HGNC=9462 UniProtKB=P60891                                                                                                                                                                                                                                                                                                                                                                                                                                                                                                                                                                                                                                                                                                                                                                                                                                                                                                                                                                                                                                                                                                                                                                                                                                                                                                    | purine nucleotide biosynthetic process<br>protein transport to vacuole involved in ubiquitin-dependent protein catabolic process via the multivesicular body sorting pathway |
| GO:0043328 | HUMAN HGNC=11358 UniProtKB=O75886,HUMAN HGNC=11357 UniProtKB=Q92783                                                                                                                                                                                                                                                                                                                                                                                                                                                                                                                                                                                                                                                                                                                                                                                                                                                                                                                                                                                                                                                                                                                                                                                                                                                                                                  |                                                                                                                                                                              |
| GO:0031175 | HUMAN HGNC=9621 UniProtKB=Q6IBS0,HUMAN HGNC=15461 UniProtKB=P55145,HUMAN HGNC=11590 UniProtKB=Q16650,HUMAN HGNC=6510 UniProtKB=P16949,HUMAN HGNC=12648 UniProtKB=Q9P0LO                                                                                                                                                                                                                                                                                                                                                                                                                                                                                                                                                                                                                                                                                                                                                                                                                                                                                                                                                                                                                                                                                                                                                                                              | neuron projection development                                                                                                                                                |
| GO:1902808 | HUMAN HGNC=533 UniProtKB=P04083                                                                                                                                                                                                                                                                                                                                                                                                                                                                                                                                                                                                                                                                                                                                                                                                                                                                                                                                                                                                                                                                                                                                                                                                                                                                                                                                      | positive regulation of cell cycle G1/S phase transition                                                                                                                      |
| GO:0051209 | HUMAN HGNC=29884 UniProtKB=Q8TF42                                                                                                                                                                                                                                                                                                                                                                                                                                                                                                                                                                                                                                                                                                                                                                                                                                                                                                                                                                                                                                                                                                                                                                                                                                                                                                                                    | release of sequestered calcium ion into cytosol                                                                                                                              |
| PC00258    | HUMAN HGNC=11030 UniProtKB=Q9Y6R1,HUMAN HGNC=10996 UniProtKB=O14975,HUMAN HGNC=11071 UniProtKB=P19634,HUMAN HGNC=11027 UniProtKB=P02730,HUMAN HGNC=17292 UniProtKB=Q8IWA5,HUMAN HGNC=20653 UniProtKB=Q8IVB4,HUMAN HGNC=11034 UniProtKB=Q2Y0W8                                                                                                                                                                                                                                                                                                                                                                                                                                                                                                                                                                                                                                                                                                                                                                                                                                                                                                                                                                                                                                                                                                                        | secondary carrier transporter                                                                                                                                                |
| GO:0031461 | HUMAN HGNC=2551 UniProtKB=Q13616,HUMAN HGNC=2717 UniProtKB=Q16531                                                                                                                                                                                                                                                                                                                                                                                                                                                                                                                                                                                                                                                                                                                                                                                                                                                                                                                                                                                                                                                                                                                                                                                                                                                                                                    | cullin-RING ubiquitin ligase complex                                                                                                                                         |
| GO:0004386 | HUMAN HGNC=10898 UniProtKB=Q15477,HUMAN HGNC=17821 UniProtKB=O00148                                                                                                                                                                                                                                                                                                                                                                                                                                                                                                                                                                                                                                                                                                                                                                                                                                                                                                                                                                                                                                                                                                                                                                                                                                                                                                  | helicase activity                                                                                                                                                            |
| GO:0048741 | HUMAN HGNC=15999 UniProtKB=Q9NZV5                                                                                                                                                                                                                                                                                                                                                                                                                                                                                                                                                                                                                                                                                                                                                                                                                                                                                                                                                                                                                                                                                                                                                                                                                                                                                                                                    | skeletal muscle fiber development                                                                                                                                            |

|            |                                                                                                                                                                                                                                                                                                                                                                                                                                                                                                                                                                                                                                                                                                                                                                                                                                      |                                           |
|------------|--------------------------------------------------------------------------------------------------------------------------------------------------------------------------------------------------------------------------------------------------------------------------------------------------------------------------------------------------------------------------------------------------------------------------------------------------------------------------------------------------------------------------------------------------------------------------------------------------------------------------------------------------------------------------------------------------------------------------------------------------------------------------------------------------------------------------------------|-------------------------------------------|
| GO:0005884 | HUMAN HGNC=6528 UniProtKB=P13796,HUMAN HGNC=2067 UniProtKB=O00151,HUMAN HGNC=23397 UniProtKB=Q5T1M5,HUMAN HGNC=11148 UniProtKB=Q16658,HUMAN HGNC=2695 UniProtKB=Q16643,HUMAN HGNC=13200 UniProtKB=Q15942,HUMAN HGNC=2696 UniProtKB=Q9UJU6,HUMAN HGNC=18304 UniProtKB=Q14019,HUMAN HGNC=3338 UniProtKB=Q14247,HUMAN HGNC=12010 UniProtKB=P09493,HUMAN HGNC=9581 UniProtKB=Q9H939,HUMAN HGNC=12736 UniProtKB=O43516,HUMAN HGNC=9621 UniProtKB=Q6IBS0,HUMAN HGNC=12012 UniProtKB=P06753,HUMAN HGNC=7590 UniProtKB=Q15746,HUMAN HGNC=18142 UniProtKB=Q9Y4D1,HUMAN HGNC=17468 UniProtKB=Q96HC4,HUMAN HGNC=4381 UniProtKB=Q14344,HUMAN HGNC=12013 UniProtKB=P67936,HUMAN HGNC=12011 UniProtKB=P07951,HUMAN HGNC=22958 UniProtKB=Q9NR12,HUMAN HGNC=6040 UniProtKB=Q13418,HUMAN HGNC=4844 UniProtKB=P14317,HUMAN HGNC=11126 UniProtKB=P53814 | actin filament                            |
| GO:0034599 | HUMAN HGNC=11179 UniProtKB=P00441,HUMAN HGNC=9355 UniProtKB=P30044,HUMAN HGNC=9353 UniProtKB=P32119,HUMAN HGNC=533 UniProtKB=P04083,HUMAN HGNC=9354 UniProtKB=P30048,HUMAN HGNC=9352 UniProtKB=Q06830,HUMAN HGNC=4623 UniProtKB=P00390,HUMAN HGNC=7377 UniProtKB=Q9UJ68                                                                                                                                                                                                                                                                                                                                                                                                                                                                                                                                                              | cellular response to oxidative stress     |
| PC00038    | HUMAN HGNC=30244 UniProtKB=Q6P1A2,HUMAN HGNC=82 UniProtKB=P09110                                                                                                                                                                                                                                                                                                                                                                                                                                                                                                                                                                                                                                                                                                                                                                     | acetyltransferase                         |
| PC00186    | HUMAN HGNC=4459 UniProtKB=P80108,HUMAN HGNC=6737 UniProtKB=O75608,HUMAN HGNC=9065 UniProtKB=P19174,HUMAN HGNC=17038 UniProtKB=Q99685,HUMAN HGNC=9055 UniProtKB=Q00722                                                                                                                                                                                                                                                                                                                                                                                                                                                                                                                                                                                                                                                                | phospholipase                             |
| GO:0015078 | HUMAN HGNC=7687 UniProtKB=O00483,HUMAN HGNC=7421 UniProtKB=P00403,HUMAN HGNC=813 UniProtKB=Q93084,HUMAN HGNC=851 UniProtKB=P38606,HUMAN HGNC=2267 UniProtKB=P20674,HUMAN HGNC=830 UniProtKB=P06576,HUMAN HGNC=850 UniProtKB=P48047,HUMAN HGNC=812 UniProtKB=P16615                                                                                                                                                                                                                                                                                                                                                                                                                                                                                                                                                                   | proton transmembrane transporter activity |
| PC00120    | HUMAN HGNC=118 UniProtKB=Q99798,HUMAN HGNC=3149 UniProtKB=Q13011,HUMAN HGNC=3151 UniProtKB=P30084                                                                                                                                                                                                                                                                                                                                                                                                                                                                                                                                                                                                                                                                                                                                    | hydratase                                 |
| GO:0005887 | HUMAN HGNC=8710 UniProtKB=Q9Y5G1,HUMAN HGNC=1630 UniProtKB=P48509,HUMAN HGNC=6156 UniProtKB=P05106,HUMAN HGNC=3616 UniProtKB=P12318,HUMAN HGNC=8823 UniProtKB=P16284,HUMAN HGNC=3537 UniProtKB=P25116,HUMAN HGNC=19100 UniProtKB=Q5VWK5,HUMAN HGNC=6153 UniProtKB=P05556,HUMAN HGNC=14674 UniProtKB=Q96QU1,HUMAN HGNC=4472 UniProtKB=Q14330,HUMAN HGNC=3540 UniProtKB=Q96RIO,HUMAN HGNC=1709 UniProtKB=P21926,HUMAN HGNC=3338 UniProtKB=Q14247,HUMAN HGNC=1692 UniProtKB=P08962,HUMAN HGNC=19296 UniProtKB=Q9UF33,HUMAN HGNC=806 UniProtKB=P54709,HUMAN HGNC=10594 UniProtKB=Q01118,HUMAN HGNC=10582 UniProtKB=Q9Y5Y9,HUMAN HGNC=6091 UniProtKB=P06213,HUMAN HGNC=237 UniProtKB=O43306                                                                                                                                               | integral component of plasma membrane     |
| GO:0016874 | HUMAN HGNC=2520 UniProtKB=Q9NRF8,HUMAN HGNC=20 UniProtKB=P49588,HUMAN HGNC=4162 UniProtKB=P41250,HUMAN HGNC=12840 UniProtKB=P54577,HUMAN HGNC=12729 UniProtKB=P23381,HUMAN HGNC=850 UniProtKB=P48047,HUMAN HGNC=4624 UniProtKB=P48637,HUMAN HGNC=24728 UniProtKB=A2RTX5,HUMAN HGNC=2678 UniProtKB=P14868,HUMAN HGNC=87                                                                                                                                                                                                                                                                                                                                                                                                                                                                                                               | ligase activity                           |

|            |                                                                                                                                                                                                                                                                                                                                                                                                                                                                                                                                                                                                                                                                                                                                                                                                                                                                                                                                                                                                                                                                                                                                                                                                                                                                                                                                                                                                                                                    |                          |
|------------|----------------------------------------------------------------------------------------------------------------------------------------------------------------------------------------------------------------------------------------------------------------------------------------------------------------------------------------------------------------------------------------------------------------------------------------------------------------------------------------------------------------------------------------------------------------------------------------------------------------------------------------------------------------------------------------------------------------------------------------------------------------------------------------------------------------------------------------------------------------------------------------------------------------------------------------------------------------------------------------------------------------------------------------------------------------------------------------------------------------------------------------------------------------------------------------------------------------------------------------------------------------------------------------------------------------------------------------------------------------------------------------------------------------------------------------------------|--------------------------|
|            | 1 UniProtKB=Q9UII2,HUMAN HGNC=11572 UniProtKB=P26639,HUMAN HGNC=26664 UniProtKB=Q8N841,HUMAN HGNC=830 UniProtKB=P06576                                                                                                                                                                                                                                                                                                                                                                                                                                                                                                                                                                                                                                                                                                                                                                                                                                                                                                                                                                                                                                                                                                                                                                                                                                                                                                                             |                          |
| GO:190161  |                                                                                                                                                                                                                                                                                                                                                                                                                                                                                                                                                                                                                                                                                                                                                                                                                                                                                                                                                                                                                                                                                                                                                                                                                                                                                                                                                                                                                                                    | organic hydroxy compound |
| 5          | HUMAN HGNC=3579 UniProtKB=P16930<br>HUMAN HGNC=9545 UniProtKB=P28062,HUMAN HGNC=9533 UniProtKB=P25789,HUMAN HGNC=2479 UniProtKB=O76096,HUMAN HGNC=8993 UniProtKB=P12273,HUMAN HGNC=9750 UniProtKB=P20742,HUMAN HGNC=2482 UniProtKB=P04080,HUMAN HGNC=9554 UniProtKB=Q99460,HUMAN HGNC=9559 UniProtKB=Q13200,HUMAN HGNC=9531 UniProtKB=P25787,HUMAN HGNC=9535 UniProtKB=P60900,HUMAN HGNC=9539 UniProtKB=P49721,HUMAN HGNC=3658 UniProtKB=Q9UGM5,HUMAN HGNC=9536 UniProtKB=O14818,HUMAN HGNC=9540 UniProtKB=P49720,HUMAN HGNC=6383 UniProtKB=P01042,HUMAN HGNC=9530 UniProtKB=P25786,HUMAN HGNC=9568 UniProtKB=Q06323,HUMAN HGNC=9532 UniProtKB=P25788,HUMAN HGNC=9537 UniProtKB=P20618                                                                                                                                                                                                                                                                                                                                                                                                                                                                                                                                                                                                                                                                                                                                                             | metabolic process        |
| GO:0004175 |                                                                                                                                                                                                                                                                                                                                                                                                                                                                                                                                                                                                                                                                                                                                                                                                                                                                                                                                                                                                                                                                                                                                                                                                                                                                                                                                                                                                                                                    | endopeptidase activity   |
|            | HUMAN HGNC=7694 UniProtKB=O14561,HUMAN HGNC=2690 UniProtKB=P07108,HUMAN HGNC=4187 UniProtKB=P02774,HUMAN HGNC=316 UniProtKB=P43652,HUMAN HGNC=317 UniProtKB=P02771,HUMAN HGNC=10992 UniProtKB=P12236,HUMAN HGNC=3951 UniProtKB=Q16595,HUMAN HGNC=18396 UniProtKB=O95969,HUMAN HGNC=9922 UniProtKB=P02753,HUMAN HGNC=10991 UniProtKB=P05141,HUMAN HGNC=11740 UniProtKB=P02787,HUMAN HGNC=6526 UniProtKB=P80188,HUMAN HGNC=399 UniProtKB=P02768                                                                                                                                                                                                                                                                                                                                                                                                                                                                                                                                                                                                                                                                                                                                                                                                                                                                                                                                                                                                      |                          |
| PC00219    |                                                                                                                                                                                                                                                                                                                                                                                                                                                                                                                                                                                                                                                                                                                                                                                                                                                                                                                                                                                                                                                                                                                                                                                                                                                                                                                                                                                                                                                    | transfer/carrier protein |
|            | HUMAN HGNC=5575 UniProtKB=A0A0B4J1V2,HUMAN HGNC=5645 UniProtKB=A0A0C4DH34,HUMAN HGNC=5549 UniProtKB=A0A0C4DH31,HUMAN HGNC=5554 UniProtKB=P01743,HUMAN HGNC=5480 UniProtKB=P01880,HUMAN HGNC=5659 UniProtKB=A0A0C4DH38,HUMAN HGNC=5634 UniProtKB=A0A075B7F0,HUMAN HGNC=38476 UniProtKB=B9A064,HUMAN HGNC=18233 UniProtKB=Q8NDB2,HUMAN HGNC=5861 UniProtKB=A0M8Q6,HUMAN HGNC=5647 UniProtKB=A0A087WSY4,HUMAN HGNC=5563 UniProtKB=A0A075B7D0,HUMAN HGNC=5856 UniProtKB=P0DOY2,HUMAN HGNC=5606 UniProtKB=P01763,HUMAN HGNC=5576 UniProtKB=P01817,HUMAN HGNC=5528 UniProtKB=P01861,HUMAN HGNC=5541 UniProtKB=P01871,HUMAN HGNC=5585 UniProtKB=A0A0C4DH32,HUMAN HGNC=5551 UniProtKB=A0A0C4DH33,HUMAN HGNC=5526 UniProtKB=P01859,HUMAN HGNC=5657 UniProtKB=P0DP08,HUMAN Ensembl=ENSG00000282639 UniProtKB=A0A0J9YX35,HUMAN Gene=HV309_HUMAN UniProtKB=P01782,HUMAN HGNC=5654 UniProtKB=P01825,HUMAN HGNC=5553 UniProtKB=A0A0A0MS14,HUMAN Gene=HV108_HUMAN UniProtKB=P0DP01,HUMAN HGNC=5624 UniProtKB=A0A0B4J1X5,HUMAN HGNC=5620 UniProtKB=P01780,HUMAN HGNC=5598 UniProtKB=A0A0C4DH35,HUMAN HGNC=5580 UniProtKB=P01762,HUMAN HGNC=5633 UniProtKB=A0A075B7D8,HUMAN HGNC=5582 UniProtKB=A0A0B4J1V0,HUMAN HGNC=5478 UniProtKB=P01876,HUMAN HGNC=5617 UniProtKB=A0A075B6Q5,HUMAN HGNC=5594 UniProtKB=P0DP03,HUMAN HGNC=5655 UniProtKB=A0A0C4DH41,HUMAN HGNC=5636 UniProtKB=A0A075B7B8,HUMAN HGNC=5586 UniProtKB=A0A0B4J1V1,HUMAN HGNC=5581 UniProtKB=P01766,H |                          |
| GO:0042113 |                                                                                                                                                                                                                                                                                                                                                                                                                                                                                                                                                                                                                                                                                                                                                                                                                                                                                                                                                                                                                                                                                                                                                                                                                                                                                                                                                                                                                                                    | B cell activation        |

|            |                                                                                                                                                                                                                                                                                                                                                                                                                                                                                                                                                                                                                           |                                                                                                  |
|------------|---------------------------------------------------------------------------------------------------------------------------------------------------------------------------------------------------------------------------------------------------------------------------------------------------------------------------------------------------------------------------------------------------------------------------------------------------------------------------------------------------------------------------------------------------------------------------------------------------------------------------|--------------------------------------------------------------------------------------------------|
|            | UMAN HGNC=5622 UniProtKB=A0A0B4J1Y9,HUMAN HGNC=5652 UniProtKB=A0A075B6R2,HUMAN HGNC=5593 UniProtKB=P0DP02,HUMAN HGNC=5479 UniProtKB=P01877,HUMAN HGNC=5619 UniProtKB=A0A0C4DH42,HUMAN HGNC=5596 UniProtKB=P01772,HUMAN HGNC=5550 UniProtKB=P23083,HUMAN HGNC=5604 UniProtKB=A0A0B4J1X8,HUMAN HGNC=5525 UniProtKB=P01857,HUMAN HGNC=5662 UniProtKB=A0A0B4J1U7,HUMAN HGNC=5601 UniProtKB=A0A0C4DH36,HUMAN HGNC=5716 UniProtKB=P01834,HUMAN HGNC=5588 UniProtKB=P01764,HUMAN HGNC=5857 UniProtKB=P0DOY3,HUMAN HGNC=5610 UniProtKB=P01767,HUMAN Ensembl=ENSG00000282150 UniProtKB=A0A0J9YY99,HUMAN HGNC=5527 UniProtKB=P01860 |                                                                                                  |
| GO:0034364 | HUMAN HGNC=607 UniProtKB=P02654,HUMAN HGNC=1869 UniProtKB=P11597                                                                                                                                                                                                                                                                                                                                                                                                                                                                                                                                                          | high-density lipoprotein particle<br>ATP-dependent microtubule motor activity, plus-end-directed |
| GO:0008574 | HUMAN HGNC=6325 UniProtKB=O60282,HUMAN HGNC=6317 UniProtKB=O43896                                                                                                                                                                                                                                                                                                                                                                                                                                                                                                                                                         | intrinsic apoptotic signaling pathway                                                            |
| GO:0097193 | HUMAN HGNC=1050 UniProtKB=P55957,HUMAN HGNC=11283 UniProtKB=P12931                                                                                                                                                                                                                                                                                                                                                                                                                                                                                                                                                        | negative regulation of RNA metabolic process                                                     |
| GO:0051253 | HUMAN HGNC=9583 UniProtKB=P26599                                                                                                                                                                                                                                                                                                                                                                                                                                                                                                                                                                                          | establishment of protein localization to organelle                                               |
| GO:0072594 | HUMAN HGNC=6499 UniProtKB=P11279,HUMAN HGNC=2974 UniProtKB=P50570,HUMAN HGNC=29125 UniProtKB=Q9UQ16                                                                                                                                                                                                                                                                                                                                                                                                                                                                                                                       | transferase activity, transferring acyl groups other than amino-acyl groups                      |
| GO:0016747 | HUMAN HGNC=82 UniProtKB=P09110                                                                                                                                                                                                                                                                                                                                                                                                                                                                                                                                                                                            |                                                                                                  |
| GO:0006939 | HUMAN HGNC=7590 UniProtKB=Q15746                                                                                                                                                                                                                                                                                                                                                                                                                                                                                                                                                                                          | smooth muscle contraction                                                                        |
| GO:0051130 | HUMAN HGNC=3757 UniProtKB=O75955,HUMAN HGNC=243 UniProtKB=P35611                                                                                                                                                                                                                                                                                                                                                                                                                                                                                                                                                          | positive regulation of cellular component organization                                           |
| GO:0002821 | HUMAN HGNC=4932 UniProtKB=P01889,HUMAN HGNC=533 UniProtKB=P04083                                                                                                                                                                                                                                                                                                                                                                                                                                                                                                                                                          | positive regulation of adaptive immune response                                                  |
| GO:0006221 | HUMAN HGNC=2520 UniProtKB=Q9NRF8                                                                                                                                                                                                                                                                                                                                                                                                                                                                                                                                                                                          | pyrimidine nucleotide biosynthetic process                                                       |
| GO:0070328 | HUMAN HGNC=1869 UniProtKB=P11597                                                                                                                                                                                                                                                                                                                                                                                                                                                                                                                                                                                          | triglyceride homeostasis                                                                         |
| GO:0000792 | HUMAN HGNC=4861 UniProtKB=Q9NRZ9                                                                                                                                                                                                                                                                                                                                                                                                                                                                                                                                                                                          | heterochromatin                                                                                  |
| GO:0016323 | HUMAN HGNC=11030 UniProtKB=Q9Y6R1,HUMAN HGNC=1681 UniProtKB=P16070,HUMAN HGNC=11027 UniProtKB=P02730,HUMAN HGNC=30377 UniProtKB=Q14160                                                                                                                                                                                                                                                                                                                                                                                                                                                                                    | basolateral plasma membrane                                                                      |
|            | HUMAN HGNC=9782 UniProtKB=P61018,HUMAN HGNC=31332 UniProtKB=Q6IQ22,HUMAN HGNC=7007 UniProtKB=P61006,HUMAN HGNC=16075 UniProtKB=Q9H082,HUMAN HGNC=24641 UniProtKB=Q7Z3J2,HUMAN HGNC=11984 UniProtKB=Q6ZVM7,HUMAN HGNC=9778 UniProtKB=P20337,HUMAN HGNC=11358 UniProtKB=O75886,HUMAN HGNC=11357 UniProtKB=Q92783,HUMAN HGNC=23186 UniProtKB=Q14677                                                                                                                                                                                                                                                                          |                                                                                                  |
| GO:0005768 | HUMAN HGNC=813 UniProtKB=Q93084,HUMAN HGNC=812 UniProtKB=P16615                                                                                                                                                                                                                                                                                                                                                                                                                                                                                                                                                           | endosome                                                                                         |
| GO:0070588 | HUMAN HGNC=6737 UniProtKB=O75608,HUMAN HGNC=613 UniProtKB=P02649                                                                                                                                                                                                                                                                                                                                                                                                                                                                                                                                                          | calcium ion transmembrane transport                                                              |
| GO:0042157 |                                                                                                                                                                                                                                                                                                                                                                                                                                                                                                                                                                                                                           | lipoprotein metabolic process                                                                    |

|           |                                                       |                                     |
|-----------|-------------------------------------------------------|-------------------------------------|
| GO:001969 |                                                       |                                     |
| 3         | HUMAN HGNC=8052 UniProtKB=Q9UKK9                      | ribose phosphate metabolic process  |
| GO:000819 |                                                       | UDP-glycosyltransferase activity    |
| 4         | HUMAN HGNC=24293 UniProtKB=Q70JA7                     |                                     |
| GO:000704 | HUMAN HGNC=15902 UniProtKB=Q8IXH8,HUMAN HGNC=14265    |                                     |
| 3         | UniProtKB=Q86UP0,HUMAN HGNC=2047 UniProtKB=O00501     | cell-cell junction assembly         |
|           | HUMAN HGNC=11442 UniProtKB=O15400,HUMAN HGNC=20120    |                                     |
| GO:000014 | UniProtKB=Q17RC7,HUMAN HGNC=11429 UniProtKB=O75558,H  |                                     |
| 9         | UMAN HGNC=11512 UniProtKB=Q9H2B2                      | SNARE binding                       |
|           | HUMAN HGNC=7106 UniProtKB=P54252,HUMAN HGNC=20063     |                                     |
|           | UniProtKB=Q86T82,HUMAN HGNC=12628 UniProtKB=P45974,HU |                                     |
| GO:001657 | MAN HGNC=25035 UniProtKB=Q5VVQ6,HUMAN HGNC=13485 U    |                                     |
| 9         | niProtKB=Q9BXU7,HUMAN HGNC=20076 UniProtKB=Q96K76     | protein deubiquitination            |
| GO:006004 |                                                       |                                     |
| 8         | HUMAN HGNC=12010 UniProtKB=P09493                     | cardiac muscle contraction          |
| GO:003051 |                                                       |                                     |
| 5         | HUMAN HGNC=12755 UniProtKB=Q9UNX4                     | snoRNA binding                      |
| GO:004398 | HUMAN HGNC=25473 UniProtKB=Q9P2N6,HUMAN HGNC=25544    |                                     |
| 4         | UniProtKB=Q9HCI7                                      | histone H4-K16 acetylation          |
| GO:002262 | HUMAN HGNC=10404 UniProtKB=P15880,HUMAN HGNC=10385    | cytosolic small ribosomal subunit   |
| 7         | UniProtKB=P25398,HUMAN HGNC=10396 UniProtKB=P62249    | positive regulation of autophagy    |
| GO:001050 |                                                       |                                     |
| 8         | HUMAN HGNC=16276 UniProtKB=Q9C035                     |                                     |
| GO:000028 |                                                       |                                     |
| 7         | HUMAN HGNC=5157 UniProtKB=P00492                      | magnesium ion binding               |
| GO:004214 | HUMAN HGNC=3350 UniProtKB=P06733,HUMAN HGNC=3353 U    | vacuole fusion, non-autophagic      |
| 4         | niProtKB=P09104,HUMAN HGNC=3354 UniProtKB=P13929      |                                     |
|           | HUMAN HGNC=253 UniProtKB=P11766,HUMAN HGNC=13420 U    |                                     |
| GO:190157 | niProtKB=Q86TP1,HUMAN HGNC=251 UniProtKB=P00326,HUMA  | organic substance catabolic process |
| 5         | N HGNC=255 UniProtKB=P28332                           |                                     |
| GO:001048 |                                                       | H4 histone                          |
| 5         | HUMAN HGNC=25473 UniProtKB=Q9P2N6                     | acetyltransferase activity          |
| GO:004424 | HUMAN HGNC=12009 UniProtKB=P60174,HUMAN HGNC=6517     |                                     |
| 9         | UniProtKB=P18428                                      | cellular biosynthetic process       |
|           | HUMAN HGNC=15848 UniProtKB=Q14141,HUMAN HGNC=9164     |                                     |
|           | UniProtKB=Q99719,HUMAN HGNC=7590 UniProtKB=Q15746,HU  |                                     |
| GO:003215 | MAN HGNC=1717 UniProtKB=Q16181,HUMAN HGNC=667 UniPr   |                                     |
| 3         | otKB=P61586,HUMAN HGNC=7729 UniProtKB=Q15019          | cell division site                  |
|           | HUMAN HGNC=14313 UniProtKB=Q8WYA0,HUMAN HGNC=2343     |                                     |
|           | 2 UniProtKB=Q9NXG0,HUMAN HGNC=10252 UniProtKB=O75116, |                                     |
|           | HUMAN HGNC=28959 UniProtKB=Q14008,HUMAN HGNC=9847     |                                     |
|           | UniProtKB=P43487,HUMAN HGNC=5048 UniProtKB=Q00839,HU  |                                     |
|           | MAN HGNC=14906 UniProtKB=Q8N4C6,HUMAN HGNC=26281 U    |                                     |
|           | niProtKB=Q6ZN84,HUMAN HGNC=7910 UniProtKB=P06748,HUM  |                                     |
| GO:000581 | AN HGNC=18994 UniProtKB=Q8TDC3,HUMAN HGNC=29262 Uni   |                                     |
| 4         | ProtKB=Q9P2H3                                         | centriole                           |
| GO:001591 |                                                       |                                     |
| 4         | HUMAN HGNC=9093 UniProtKB=P55058                      | phospholipid transport              |
|           | HUMAN HGNC=6401 UniProtKB=Q92973,HUMAN HGNC=2431 U    |                                     |
|           | niProtKB=P55060,HUMAN HGNC=8062 UniProtKB=P49790,HUMA |                                     |
|           | N HGNC=9846 UniProtKB=P62826,HUMAN HGNC=17103 UniProt |                                     |
|           | KB=Q9Y5L0,HUMAN HGNC=9852 UniProtKB=O95373,HUMAN HG   |                                     |
| GO:000660 | NC=6396 UniProtKB=O00505,HUMAN HGNC=17859 UniProtKB=Q |                                     |
| 6         | 5SRE5,HUMAN HGNC=6400 UniProtKB=Q14974                | protein import into nucleus         |

|           |                                                                                                                                                                                                                                                                                                                                                                                                                    |                                                     |
|-----------|--------------------------------------------------------------------------------------------------------------------------------------------------------------------------------------------------------------------------------------------------------------------------------------------------------------------------------------------------------------------------------------------------------------------|-----------------------------------------------------|
| GO:000270 |                                                                                                                                                                                                                                                                                                                                                                                                                    | positive regulation of lymphocyte mediated immunity |
| 8         | HUMAN HGNC=4932 UniProtKB=P01889<br>HUMAN HGNC=9786 UniProtKB=P20340,HUMAN HGNC=2230 UniProtKB=P53621,HUMAN HGNC=14902 UniProtKB=Q9NRW1,HUMAN HGNC=18621 UniProtKB=Q9Y2V7,HUMAN HGNC=2231 UniProtKB=P53618,HUMAN HGNC=2232 UniProtKB=P35606,HUMAN HGNC=8016 UniProtKB=P46459                                                                                                                                       | intra-Golgi vesicle-mediated transport              |
| GO:000689 |                                                                                                                                                                                                                                                                                                                                                                                                                    |                                                     |
| 1         |                                                                                                                                                                                                                                                                                                                                                                                                                    |                                                     |
| GO:000153 | HUMAN HGNC=1628 UniProtKB=P08571,HUMAN HGNC=6517 UniProtKB=P18428,HUMAN HGNC=1472 UniProtKB=P49913                                                                                                                                                                                                                                                                                                                 | lipopolysaccharide binding                          |
| 0         |                                                                                                                                                                                                                                                                                                                                                                                                                    |                                                     |
| GO:007170 | HUMAN HGNC=11510 UniProtKB=Q8N9I0,HUMAN HGNC=11512 UniProtKB=Q9H2B2<br>HUMAN HGNC=11056 UniProtKB=P48067,HUMAN HGNC=800 UniProtKB=P50993,HUMAN HGNC=18002 UniProtKB=Q9NS69,HUMAN HGNC=813 UniProtKB=Q93084,HUMAN HGNC=806 UniProtKB=P54709,HUMAN HGNC=13531 UniProtKB=Q9Y2Q0,HUMAN HGNC=17943 UniProtKB=Q9GZP9,HUMAN HGNC=21101 UniProtKB=O60888,HUMAN HGNC=11985 UniProtKB=O94826,HUMAN HGNC=812 UniProtKB=P16615 | nitrogen compound transport                         |
| 5         |                                                                                                                                                                                                                                                                                                                                                                                                                    |                                                     |
| PC00068   |                                                                                                                                                                                                                                                                                                                                                                                                                    | primary active transporter                          |
| GO:190170 | HUMAN HGNC=1516 UniProtKB=P04040,HUMAN HGNC=4553 UniProtKB=P07203,HUMAN HGNC=612 UniProtKB=P05090                                                                                                                                                                                                                                                                                                                  | response to oxygen-containing compound              |
| 0         |                                                                                                                                                                                                                                                                                                                                                                                                                    |                                                     |
| GO:004478 | HUMAN HGNC=26555 UniProtKB=Q3SY00,HUMAN HGNC=17060 UniProtKB=Q92845                                                                                                                                                                                                                                                                                                                                                | cilium organization                                 |
| 2         |                                                                                                                                                                                                                                                                                                                                                                                                                    |                                                     |
| GO:004592 | HUMAN HGNC=11491 UniProtKB=P43405,HUMAN HGNC=9767 UniProtKB=O00194                                                                                                                                                                                                                                                                                                                                                 | positive regulation of exocytosis                   |
| 1         |                                                                                                                                                                                                                                                                                                                                                                                                                    |                                                     |
| GO:003090 |                                                                                                                                                                                                                                                                                                                                                                                                                    |                                                     |
| 0         | HUMAN HGNC=11590 UniProtKB=Q16650                                                                                                                                                                                                                                                                                                                                                                                  | forebrain development                               |
| GO:000218 | HUMAN HGNC=10372 UniProtKB=P05386,HUMAN HGNC=4622 UniProtKB=Q8IYD1,HUMAN HGNC=4621 UniProtKB=P15170                                                                                                                                                                                                                                                                                                                | cytoplasmic translation                             |
| 1         |                                                                                                                                                                                                                                                                                                                                                                                                                    |                                                     |
| GO:002240 |                                                                                                                                                                                                                                                                                                                                                                                                                    | regulation of cell-cell adhesion                    |
| 7         | HUMAN HGNC=23151 UniProtKB=Q86UX7<br>HUMAN HGNC=1090 UniProtKB=Q03001,HUMAN HGNC=544 UniProtKB=P08133,HUMAN HGNC=533 UniProtKB=P04083,HUMAN HGNC=9069 UniProtKB=Q15149,HUMAN HGNC=25361 UniProtKB=Q8N264                                                                                                                                                                                                           |                                                     |
| GO:004206 |                                                                                                                                                                                                                                                                                                                                                                                                                    | wound healing                                       |
| 0         |                                                                                                                                                                                                                                                                                                                                                                                                                    |                                                     |
| GO:003001 | HUMAN HGNC=16051 UniProtKB=Q8TEW0,HUMAN HGNC=18994 UniProtKB=Q8TDC3                                                                                                                                                                                                                                                                                                                                                | establishment of cell polarity                      |
| 0         |                                                                                                                                                                                                                                                                                                                                                                                                                    |                                                     |
| GO:000689 | HUMAN HGNC=555 UniProtKB=O43747,HUMAN HGNC=568 UniProtKB=O14617                                                                                                                                                                                                                                                                                                                                                    | Golgi to vacuole transport                          |
| 6         |                                                                                                                                                                                                                                                                                                                                                                                                                    |                                                     |
| GO:000581 | HUMAN HGNC=6891 UniProtKB=Q15555,HUMAN HGNC=6890 UniProtKB=Q15691,HUMAN HGNC=11126 UniProtKB=P53814                                                                                                                                                                                                                                                                                                                | microtubule organizing center                       |
| 5         |                                                                                                                                                                                                                                                                                                                                                                                                                    |                                                     |
| GO:000726 | HUMAN HGNC=10011 UniProtKB=Q15382,HUMAN HGNC=21035 UniProtKB=Q8N392                                                                                                                                                                                                                                                                                                                                                | small GTPase mediated signal transduction           |
| 4         |                                                                                                                                                                                                                                                                                                                                                                                                                    |                                                     |
| GO:005123 |                                                                                                                                                                                                                                                                                                                                                                                                                    | regulation of multicellular organismal process      |
| 9         | HUMAN HGNC=613 UniProtKB=P02649<br>HUMAN HGNC=16015 UniProtKB=Q9H8S9,HUMAN HGNC=29801 UniProtKB=Q7L9L4,HUMAN HGNC=8927 UniProtKB=Q93100                                                                                                                                                                                                                                                                            |                                                     |
| PC00138   |                                                                                                                                                                                                                                                                                                                                                                                                                    | kinase activator                                    |
| GO:000628 | HUMAN HGNC=26200 UniProtKB=Q9H668,HUMAN HGNC=20473 UniProtKB=Q9BX63,HUMAN HGNC=2717 UniProtKB=Q16531                                                                                                                                                                                                                                                                                                               | nucleotide-excision repair                          |
| 9         |                                                                                                                                                                                                                                                                                                                                                                                                                    |                                                     |
| GO:001679 | HUMAN HGNC=17059 UniProtKB=Q9NTJ5,HUMAN HGNC=7618 UniProtKB=O14974,HUMAN HGNC=14451 UniProtKB=Q9BQK8,HUMAN HGNC=10542 UniProtKB=O95248                                                                                                                                                                                                                                                                             | phosphatase activity                                |
| 1         |                                                                                                                                                                                                                                                                                                                                                                                                                    |                                                     |
| PC00112   | HUMAN HGNC=16948 UniProtKB=Q969H8,HUMAN HGNC=5466 UniProtKB=P01344,HUMAN HGNC=11766 UniProtKB=P01137                                                                                                                                                                                                                                                                                                               | growth factor                                       |

|            |                                                                                                                                                                                                                                                                                                                                                                                 |                                                                                             |
|------------|---------------------------------------------------------------------------------------------------------------------------------------------------------------------------------------------------------------------------------------------------------------------------------------------------------------------------------------------------------------------------------|---------------------------------------------------------------------------------------------|
| GO:0031503 | HUMAN HGNC=20120 UniProtKB=Q17RC7,HUMAN HGNC=2974 UniProtKB=P50570,HUMAN HGNC=29125 UniProtKB=Q9UQ16                                                                                                                                                                                                                                                                            | protein-containing complex localization                                                     |
| GO:0008284 | HUMAN HGNC=8601 UniProtKB=Q06141,HUMAN HGNC=19312 UniProtKB=Q56P03,HUMAN HGNC=7002 UniProtKB=A6NDR6                                                                                                                                                                                                                                                                             | positive regulation of cell population proliferation                                        |
| GO:0016604 | HUMAN HGNC=10499 UniProtKB=P06702                                                                                                                                                                                                                                                                                                                                               | nuclear body                                                                                |
| GO:0045216 | HUMAN HGNC=6616 UniProtKB=P48059,HUMAN HGNC=243 UniProtKB=P35611,HUMAN HGNC=11828 UniProtKB=Q9UDY2,HUMAN HGNC=2444 UniProtKB=P41240                                                                                                                                                                                                                                             | cell-cell junction organization                                                             |
| GO:0030983 | HUMAN HGNC=7326 UniProtKB=P20585                                                                                                                                                                                                                                                                                                                                                | mismatched DNA binding                                                                      |
| GO:0005637 | HUMAN HGNC=8533 UniProtKB=P51575                                                                                                                                                                                                                                                                                                                                                | nuclear inner membrane                                                                      |
| GO:0000151 | HUMAN HGNC=463 UniProtKB=Q9UKV5,HUMAN HGNC=11619 UniProtKB=Q15370,HUMAN HGNC=17943 UniProtKB=Q9GZP9                                                                                                                                                                                                                                                                             | ubiquitin ligase complex negative regulation of cellular response to growth factor stimulus |
| GO:0090288 | HUMAN HGNC=7178 UniProtKB=Q13201                                                                                                                                                                                                                                                                                                                                                |                                                                                             |
| GO:0032432 | HUMAN HGNC=6528 UniProtKB=P13796,HUMAN HGNC=11148 UniProtKB=Q16658,HUMAN HGNC=4381 UniProtKB=Q14344                                                                                                                                                                                                                                                                             | actin filament bundle                                                                       |
| GO:0019934 | HUMAN HGNC=7237 UniProtKB=Q9Y6F6                                                                                                                                                                                                                                                                                                                                                | cGMP-mediated signaling                                                                     |
| GO:0006812 | HUMAN HGNC=11510 UniProtKB=Q8N9I0,HUMAN HGNC=11512 UniProtKB=Q9H2B2                                                                                                                                                                                                                                                                                                             | cation transport                                                                            |
| GO:0030141 | HUMAN HGNC=11446 UniProtKB=O00186,HUMAN HGNC=11445 UniProtKB=Q15833,HUMAN HGNC=11510 UniProtKB=Q8N9I0,HUMAN HGNC=2532 UniProtKB=P08311,HUMAN HGNC=913 UniProtKB=P20160,HUMAN HGNC=9767 UniProtKB=O00194                                                                                                                                                                         | secretory granule                                                                           |
| GO:0019538 | HUMAN HGNC=6517 UniProtKB=P18428                                                                                                                                                                                                                                                                                                                                                | protein metabolic process                                                                   |
| PC00102    | HUMAN HGNC=6561 UniProtKB=P09382,HUMAN HGNC=7516 UniProtKB=Q9HC84,HUMAN HGNC=13572 UniProtKB=Q9Y6R7,HUMAN HGNC=12726 UniProtKB=P04275,HUMAN HGNC=7515 UniProtKB=P98088,HUMAN HGNC=12601 UniProtKB=O75445,HUMAN HGNC=25012 UniProtKB=Q3ZCW2,HUMAN HGNC=885 UniProtKB=O75882                                                                                                      | extracellular matrix protein                                                                |
| GO:0032007 | HUMAN HGNC=18423 UniProtKB=O75140                                                                                                                                                                                                                                                                                                                                               | negative regulation of TOR signaling                                                        |
| PC00061    | HUMAN HGNC=10494 UniProtKB=P26447,HUMAN HGNC=8044 UniProtKB=P80303,HUMAN HGNC=9935 UniProtKB=Q14257,HUMAN HGNC=10498 UniProtKB=P05109,HUMAN HGNC=10499 UniProtKB=P06702,HUMAN HGNC=1458 UniProtKB=O43852,HUMAN HGNC=10496 UniProtKB=P06703,HUMAN HGNC=1449 UniProtKB=P0DP25,HUMAN HGNC=1452 UniProtKB=P27482,HUMAN HGNC=10497 UniProtKB=P31151,HUMAN HGNC=8043 UniProtKB=Q02818 | calmodulin-related                                                                          |
| GO:0045597 | HUMAN HGNC=11491 UniProtKB=P43405                                                                                                                                                                                                                                                                                                                                               | positive regulation of cell differentiation                                                 |
| GO:0002062 | HUMAN HGNC=544 UniProtKB=P08133                                                                                                                                                                                                                                                                                                                                                 | chondrocyte differentiation                                                                 |
| GO:0006368 | HUMAN HGNC=11617 UniProtKB=Q15369,HUMAN HGNC=24224 UniProtKB=Q9NYV4                                                                                                                                                                                                                                                                                                             | transcription elongation from RNA polymerase II promoter                                    |

|           |                                                                                                                                                                                                                                                                                                                                                                                                                                                                                                                                                                                                                                                                                                                                                                                                                                                                                                                                                                                                                                                                                                                                                                                                                                                                                                                                                                                                                                                                                                                                                                                                                                                                                                                                                                                                                                                                                                                                                                                                                                                                                                                                                                                                                                                                                                                                                                                                          |                                                                            |
|-----------|----------------------------------------------------------------------------------------------------------------------------------------------------------------------------------------------------------------------------------------------------------------------------------------------------------------------------------------------------------------------------------------------------------------------------------------------------------------------------------------------------------------------------------------------------------------------------------------------------------------------------------------------------------------------------------------------------------------------------------------------------------------------------------------------------------------------------------------------------------------------------------------------------------------------------------------------------------------------------------------------------------------------------------------------------------------------------------------------------------------------------------------------------------------------------------------------------------------------------------------------------------------------------------------------------------------------------------------------------------------------------------------------------------------------------------------------------------------------------------------------------------------------------------------------------------------------------------------------------------------------------------------------------------------------------------------------------------------------------------------------------------------------------------------------------------------------------------------------------------------------------------------------------------------------------------------------------------------------------------------------------------------------------------------------------------------------------------------------------------------------------------------------------------------------------------------------------------------------------------------------------------------------------------------------------------------------------------------------------------------------------------------------------------|----------------------------------------------------------------------------|
| GO:003251 |                                                                                                                                                                                                                                                                                                                                                                                                                                                                                                                                                                                                                                                                                                                                                                                                                                                                                                                                                                                                                                                                                                                                                                                                                                                                                                                                                                                                                                                                                                                                                                                                                                                                                                                                                                                                                                                                                                                                                                                                                                                                                                                                                                                                                                                                                                                                                                                                          | late endosome to vacuole transport via multivesicular body sorting pathway |
| 1         | HUMAN   HGNC=20954   UniProtKB=Q9NP79                                                                                                                                                                                                                                                                                                                                                                                                                                                                                                                                                                                                                                                                                                                                                                                                                                                                                                                                                                                                                                                                                                                                                                                                                                                                                                                                                                                                                                                                                                                                                                                                                                                                                                                                                                                                                                                                                                                                                                                                                                                                                                                                                                                                                                                                                                                                                                    |                                                                            |
| GO:001682 | HUMAN   HGNC=746   UniProtKB=P04424, HUMAN   HGNC=291   UniProtKB=P30566                                                                                                                                                                                                                                                                                                                                                                                                                                                                                                                                                                                                                                                                                                                                                                                                                                                                                                                                                                                                                                                                                                                                                                                                                                                                                                                                                                                                                                                                                                                                                                                                                                                                                                                                                                                                                                                                                                                                                                                                                                                                                                                                                                                                                                                                                                                                 | lyase activity                                                             |
| 9         |                                                                                                                                                                                                                                                                                                                                                                                                                                                                                                                                                                                                                                                                                                                                                                                                                                                                                                                                                                                                                                                                                                                                                                                                                                                                                                                                                                                                                                                                                                                                                                                                                                                                                                                                                                                                                                                                                                                                                                                                                                                                                                                                                                                                                                                                                                                                                                                                          | actin filament-based process                                               |
| GO:003002 | HUMAN   HGNC=12736   UniProtKB=O43516, HUMAN   HGNC=21230   UniProtKB=Q9P1F3                                                                                                                                                                                                                                                                                                                                                                                                                                                                                                                                                                                                                                                                                                                                                                                                                                                                                                                                                                                                                                                                                                                                                                                                                                                                                                                                                                                                                                                                                                                                                                                                                                                                                                                                                                                                                                                                                                                                                                                                                                                                                                                                                                                                                                                                                                                             |                                                                            |
| 9         |                                                                                                                                                                                                                                                                                                                                                                                                                                                                                                                                                                                                                                                                                                                                                                                                                                                                                                                                                                                                                                                                                                                                                                                                                                                                                                                                                                                                                                                                                                                                                                                                                                                                                                                                                                                                                                                                                                                                                                                                                                                                                                                                                                                                                                                                                                                                                                                                          |                                                                            |
| GO:007267 |                                                                                                                                                                                                                                                                                                                                                                                                                                                                                                                                                                                                                                                                                                                                                                                                                                                                                                                                                                                                                                                                                                                                                                                                                                                                                                                                                                                                                                                                                                                                                                                                                                                                                                                                                                                                                                                                                                                                                                                                                                                                                                                                                                                                                                                                                                                                                                                                          | lymphocyte migration                                                       |
| 6         | HUMAN   HGNC=10632   UniProtKB=P13501                                                                                                                                                                                                                                                                                                                                                                                                                                                                                                                                                                                                                                                                                                                                                                                                                                                                                                                                                                                                                                                                                                                                                                                                                                                                                                                                                                                                                                                                                                                                                                                                                                                                                                                                                                                                                                                                                                                                                                                                                                                                                                                                                                                                                                                                                                                                                                    |                                                                            |
|           | HUMAN   HGNC=5575   UniProtKB=A0A0B4J1V2, HUMAN   HGNC=5645   UniProtKB=A0A0C4DH34, HUMAN   HGNC=5549   UniProtKB=A0A0C4DH31, HUMAN   HGNC=5554   UniProtKB=P01743, HUMAN   HGNC=5480   UniProtKB=P01880, HUMAN   HGNC=5659   UniProtKB=A0A0C4DH38, HUMAN   HGNC=5634   UniProtKB=A0A075B7F0, HUMAN   HGNC=38476   UniProtKB=B9A064, HUMAN   HGNC=5861   UniProtKB=A0M8Q6, HUMAN   HGNC=5647   UniProtKB=A0A087WSY4, HUMAN   HGNC=5563   UniProtKB=A0A075B7D0, HUMAN   HGNC=5856   UniProtKB=P0DOY2, HUMAN   HGNC=5606   UniProtKB=P01763, HUMAN   HGNC=5576   UniProtKB=P01817, HUMAN   HGNC=5528   UniProtKB=P01861, HUMAN   HGNC=5541   UniProtKB=P01871, HUMAN   HGNC=5585   UniProtKB=A0A0C4DH32, HUMAN   HGNC=6171   UniProtKB=Q08881, HUMAN   HGNC=5551   UniProtKB=A0A0C4DH33, HUMAN   HGNC=5526   UniProtKB=P01859, HUMAN   HGNC=5657   UniProtKB=P0DP08, HUMAN   Ensembl=ENSG00000282639   UniProtKB=A0A0J9YX35, HUMAN   Gene=HV309_HUMAN   UniProtKB=P01782, HUMAN   HGNC=5654   UniProtKB=P01825, HUMAN   HGNC=5553   UniProtKB=A0A0A0MS14, HUMAN   Gene=HV108_HUMAN   UniProtKB=P0DP01, HUMAN   HGNC=5624   UniProtKB=A0A0B4J1X5, HUMAN   HGNC=5620   UniProtKB=P01780, HUMAN   HGNC=5598   UniProtKB=A0A0C4DH35, HUMAN   HGNC=5580   UniProtKB=P01762, HUMAN   HGNC=5633   UniProtKB=A0A075B7D8, HUMAN   HGNC=5582   UniProtKB=A0A0B4J1V0, HUMAN   HGNC=5478   UniProtKB=P01876, HUMAN   HGNC=5617   UniProtKB=A0A075B6Q5, HUMAN   HGNC=5594   UniProtKB=P0DP03, HUMAN   HGNC=5655   UniProtKB=A0A0C4DH41, HUMAN   HGNC=5636   UniProtKB=A0A075B7B8, HUMAN   HGNC=5586   UniProtKB=A0A0B4J1V1, HUMAN   HGNC=5581   UniProtKB=P01766, HUMAN   HGNC=5622   UniProtKB=A0A0B4J1Y9, HUMAN   HGNC=5652   UniProtKB=A0A075B6R2, HUMAN   HGNC=5593   UniProtKB=P0DP02, HUMAN   HGNC=5479   UniProtKB=P01877, HUMAN   HGNC=5619   UniProtKB=A0A0C4DH42, HUMAN   HGNC=5596   UniProtKB=P01772, HUMAN   HGNC=5550   UniProtKB=P23083, HUMAN   HGNC=11491   UniProtKB=P43405, HUMAN   HGNC=5604   UniProtKB=A0A0B4J1X8, HUMAN   HGNC=5525   UniProtKB=P01857, HUMAN   HGNC=5662   UniProtKB=A0A0B4J1U7, HUMAN   HGNC=5601   UniProtKB=A0A0C4DH36, HUMAN   HGNC=5716   UniProtKB=P01834, HUMAN   HGNC=5588   UniProtKB=P01764, HUMAN   HGNC=5857   UniProtKB=P0DOY3, HUMAN   HGNC=5610   UniProtKB=P01767, HUMAN   Ensembl=ENSG00000282150   UniProtKB=A0A0J9YY99, HUMAN   HGNC=5527   UniProtKB=P01860 |                                                                            |
| GO:005085 | HUMAN   HGNC=26486   UniProtKB=Q6PJW8, HUMAN   HGNC=3757   UniProtKB=O75955, HUMAN   HGNC=10534   UniProtKB=Q9NR31, HUMAN   HGNC=533   UniProtKB=P04083                                                                                                                                                                                                                                                                                                                                                                                                                                                                                                                                                                                                                                                                                                                                                                                                                                                                                                                                                                                                                                                                                                                                                                                                                                                                                                                                                                                                                                                                                                                                                                                                                                                                                                                                                                                                                                                                                                                                                                                                                                                                                                                                                                                                                                                  | B cell receptor signaling pathway                                          |
| 3         |                                                                                                                                                                                                                                                                                                                                                                                                                                                                                                                                                                                                                                                                                                                                                                                                                                                                                                                                                                                                                                                                                                                                                                                                                                                                                                                                                                                                                                                                                                                                                                                                                                                                                                                                                                                                                                                                                                                                                                                                                                                                                                                                                                                                                                                                                                                                                                                                          |                                                                            |
| GO:005105 | HUMAN   HGNC=4037   UniProtKB=P06241, HUMAN   HGNC=11364   UniProtKB=P40763, HUMAN   HGNC=24588   UniProtKB=Q86XP6, HUMAN                                                                                                                                                                                                                                                                                                                                                                                                                                                                                                                                                                                                                                                                                                                                                                                                                                                                                                                                                                                                                                                                                                                                                                                                                                                                                                                                                                                                                                                                                                                                                                                                                                                                                                                                                                                                                                                                                                                                                                                                                                                                                                                                                                                                                                                                                | positive regulation of transport                                           |
| 0         |                                                                                                                                                                                                                                                                                                                                                                                                                                                                                                                                                                                                                                                                                                                                                                                                                                                                                                                                                                                                                                                                                                                                                                                                                                                                                                                                                                                                                                                                                                                                                                                                                                                                                                                                                                                                                                                                                                                                                                                                                                                                                                                                                                                                                                                                                                                                                                                                          | regulation of cell population proliferation                                |
| GO:004212 |                                                                                                                                                                                                                                                                                                                                                                                                                                                                                                                                                                                                                                                                                                                                                                                                                                                                                                                                                                                                                                                                                                                                                                                                                                                                                                                                                                                                                                                                                                                                                                                                                                                                                                                                                                                                                                                                                                                                                                                                                                                                                                                                                                                                                                                                                                                                                                                                          |                                                                            |
| 7         |                                                                                                                                                                                                                                                                                                                                                                                                                                                                                                                                                                                                                                                                                                                                                                                                                                                                                                                                                                                                                                                                                                                                                                                                                                                                                                                                                                                                                                                                                                                                                                                                                                                                                                                                                                                                                                                                                                                                                                                                                                                                                                                                                                                                                                                                                                                                                                                                          |                                                                            |

|            |                                                                                                                                                                                                                                                                                                                                                                                                                                                                                                                      |                                                            |
|------------|----------------------------------------------------------------------------------------------------------------------------------------------------------------------------------------------------------------------------------------------------------------------------------------------------------------------------------------------------------------------------------------------------------------------------------------------------------------------------------------------------------------------|------------------------------------------------------------|
| GO:0005654 | MAN HGNC=12841 UniProtKB=P07947,HUMAN HGNC=11283 UniProtKB=P12931,HUMAN HGNC=6735 UniProtKB=P07948,HUMAN HGNC=11766 UniProtKB=P01137                                                                                                                                                                                                                                                                                                                                                                                 | nucleoplasm                                                |
| PC00028    | HUMAN HGNC=8648 UniProtKB=Q15366,HUMAN HGNC=5043 UniProtKB=P31942,HUMAN HGNC=23172 UniProtKB=Q8N699,HUMAN HGNC=29190 UniProtKB=Q9UPQ9,HUMAN HGNC=26022 UniProtKB=Q7L0Y3,HUMAN HGNC=6396 UniProtKB=O00505,HUMAN HGNC=9813 UniProtKB=P54727,HUMAN HGNC=26224 UniProtKB=Q9H5Z6,HUMAN HGNC=8087 UniProtKB=P29728,HUMAN HGNC=8647 UniProtKB=Q15365,HUMAN HGNC=9568 UniProtKB=Q06323,HUMAN HGNC=5036 UniProtKB=Q14103,HUMAN HGNC=26378 UniProtKB=Q8N7C3,HUMAN HGNC=16272 UniProtKB=Q96JK9,HUMAN HGNC=7910 UniProtKB=P06748 | Hsp90 family chaperone                                     |
| GO:0016746 | HUMAN HGNC=5253 UniProtKB=P07900,HUMAN HGNC=5258 UniProtKB=P08238,HUMAN HGNC=12028 UniProtKB=P14625                                                                                                                                                                                                                                                                                                                                                                                                                  | transferase activity,                                      |
| GO:0000187 | HUMAN HGNC=2422 UniProtKB=O75390,HUMAN HGNC=3531 UniProtKB=P00488                                                                                                                                                                                                                                                                                                                                                                                                                                                    | transferring acyl groups                                   |
|            | HUMAN HGNC=6766 UniProtKB=Q8WYG6,HUMAN HGNC=6840 UniProtKB=Q02750                                                                                                                                                                                                                                                                                                                                                                                                                                                    | activation of MAPK activity                                |
| GO:0050794 | HUMAN HGNC=17169 UniProtKB=Q13162,HUMAN HGNC=16753 UniProtKB=P30041,HUMAN HGNC=9355 UniProtKB=P30044,HUMAN HGNC=9353 UniProtKB=P32119,HUMAN HGNC=9354 UniProtKB=P30048,HUMAN HGNC=9352 UniProtKB=Q06830,HUMAN HGNC=4623 UniProtKB=P00390,HUMAN HGNC=10582 UniProtKB=Q9Y5Y9                                                                                                                                                                                                                                           | regulation of cellular process                             |
| GO:0023051 | HUMAN HGNC=11510 UniProtKB=Q8N9I0,HUMAN HGNC=11512 UniProtKB=Q9H2B2                                                                                                                                                                                                                                                                                                                                                                                                                                                  | regulation of signaling                                    |
| GO:0003727 | HUMAN HGNC=5048 UniProtKB=Q00839,HUMAN HGNC=6038 UniProtKB=Q12906,HUMAN HGNC=3285 UniProtKB=P23588                                                                                                                                                                                                                                                                                                                                                                                                                   | single-stranded RNA binding                                |
| GO:0034976 | HUMAN HGNC=30167 UniProtKB=P13667,HUMAN HGNC=8548 UniProtKB=P07237,HUMAN HGNC=4606 UniProtKB=P30101                                                                                                                                                                                                                                                                                                                                                                                                                  | response to endoplasmic reticulum stress                   |
| GO:0046580 | HUMAN HGNC=25361 UniProtKB=Q8N264                                                                                                                                                                                                                                                                                                                                                                                                                                                                                    | negative regulation of Ras protein signal transduction     |
| GO:1903706 | HUMAN HGNC=11491 UniProtKB=P43405,HUMAN HGNC=29884 UniProtKB=Q8TF42                                                                                                                                                                                                                                                                                                                                                                                                                                                  | regulation of hemopoiesis                                  |
|            | HUMAN HGNC=4395 UniProtKB=P19086,HUMAN HGNC=4384 UniProtKB=P63096,HUMAN HGNC=4398 UniProtKB=P62879,HUMAN HGNC=4387 UniProtKB=P08754,HUMAN HGNC=20731 UniProtKB=Q9HAV0,HUMAN HGNC=4385 UniProtKB=P04899,HUMAN HGNC=12841 UniProtKB=P07947,HUMAN HGNC=11283 UniProtKB=P12931,HUMAN HGNC=4390 UniProtKB=P50148,HUMAN HGNC=6735 UniProtKB=P07948,HUMAN HGNC=4037 UniProtKB=P06241,HUMAN HGNC=4381 UniProtKB=Q14344,HUMAN HGNC=4393 UniProtKB=P11488,HUMAN HGNC=4396 UniProtKB=P62873                                     | extrinsic component of cytoplasmic side of plasma membrane |
| GO:0006869 | HUMAN HGNC=9922 UniProtKB=P02753,HUMAN HGNC=14637 UniProtKB=Q86UK0,HUMAN HGNC=1869 UniProtKB=P11597                                                                                                                                                                                                                                                                                                                                                                                                                  | lipid transport                                            |
|            | HUMAN HGNC=7900 UniProtKB=P55786,HUMAN HGNC=253 UniProtKB=P11766,HUMAN HGNC=317 UniProtKB=P02771,HUMAN HGNC=251 UniProtKB=P00326,HUMAN HGNC=395 UniProtKB=P13716,HUMAN HGNC=18173 UniProtKB=Q9NZ08,HUMAN HGNC=255 UniProtKB=P28332                                                                                                                                                                                                                                                                                   | zinc ion binding                                           |
| GO:0008270 |                                                                                                                                                                                                                                                                                                                                                                                                                                                                                                                      | establishment of protein                                   |
| GO:0072666 | HUMAN HGNC=1406 UniProtKB=Q9Y698                                                                                                                                                                                                                                                                                                                                                                                                                                                                                     | localization to vacuole                                    |

|            |                                                                                                                                                                                                                                                                                                                                                                                    |                                                                         |
|------------|------------------------------------------------------------------------------------------------------------------------------------------------------------------------------------------------------------------------------------------------------------------------------------------------------------------------------------------------------------------------------------|-------------------------------------------------------------------------|
| GO:0006509 | HUMAN HGNC=11820 UniProtKB=P01033,HUMAN HGNC=188 UniProtKB=O14672                                                                                                                                                                                                                                                                                                                  | membrane protein ectodomain proteolysis                                 |
| GO:0031981 | HUMAN HGNC=9552 UniProtKB=P62195                                                                                                                                                                                                                                                                                                                                                   | nuclear lumen                                                           |
| GO:0042162 | HUMAN HGNC=19246 UniProtKB=Q9NYB0                                                                                                                                                                                                                                                                                                                                                  | telomeric DNA binding                                                   |
| PC00180    | HUMAN HGNC=17169 UniProtKB=Q13162,HUMAN HGNC=3423 UniProtKB=P11678,HUMAN HGNC=16753 UniProtKB=P30041,HUMAN HGNC=4555 UniProtKB=P22352,HUMAN HGNC=7218 UniProtKB=P05164,HUMAN HGNC=9353 UniProtKB=P32119,HUMAN HGNC=1516 UniProtKB=P04040,HUMAN HGNC=4553 UniProtKB=P07203,HUMAN HGNC=9354 UniProtKB=P30048,HUMAN HGNC=9352 UniProtKB=Q06830                                        | peroxidase                                                              |
| GO:0005680 | HUMAN HGNC=15713 UniProtKB=Q9UJX4,HUMAN HGNC=14452 UniProtKB=Q9NYG5                                                                                                                                                                                                                                                                                                                | anaphase-promoting complex                                              |
| PC00263    | HUMAN HGNC=782 UniProtKB=O95260,HUMAN HGNC=12840 UniProtKB=P54577                                                                                                                                                                                                                                                                                                                  | translational protein                                                   |
| GO:0033674 | HUMAN HGNC=19296 UniProtKB=Q9UF33,HUMAN HGNC=6091 UniProtKB=P06213                                                                                                                                                                                                                                                                                                                 | positive regulation of kinase activity                                  |
| GO:0046579 | HUMAN HGNC=3537 UniProtKB=P25116,HUMAN HGNC=4472 UniProtKB=Q14330,HUMAN HGNC=3540 UniProtKB=Q96RI0                                                                                                                                                                                                                                                                                 | positive regulation of Ras protein signal transduction nuclear receptor |
| GO:0030374 | HUMAN HGNC=30025 UniProtKB=Q5VV67,HUMAN HGNC=7670 UniProtKB=Q9Y6Q9                                                                                                                                                                                                                                                                                                                 | transcription coactivator activity                                      |
| GO:0016787 | HUMAN HGNC=18344 UniProtKB=Q9BX68,HUMAN HGNC=3579 UniProtKB=P16930,HUMAN HGNC=343 UniProtKB=P23526                                                                                                                                                                                                                                                                                 | hydrolase activity                                                      |
| GO:0004540 | HUMAN HGNC=10046 UniProtKB=P12724,HUMAN HGNC=10045 UniProtKB=P10153                                                                                                                                                                                                                                                                                                                | ribonuclease activity                                                   |
| GO:0005488 | HUMAN HGNC=15848 UniProtKB=Q14141,HUMAN HGNC=4555 UniProtKB=P22352,HUMAN HGNC=9164 UniProtKB=Q99719,HUMAN HGNC=1717 UniProtKB=Q16181,HUMAN HGNC=6526 UniProtKB=P80188,HUMAN HGNC=2905 UniProtKB=O14490,HUMAN HGNC=7729 UniProtKB=Q15019                                                                                                                                            | binding                                                                 |
| GO:0071407 | HUMAN HGNC=9855 UniProtKB=P62834,HUMAN HGNC=9857 UniProtKB=P61224                                                                                                                                                                                                                                                                                                                  | cellular response to organic cyclic compound                            |
| GO:0048194 | HUMAN HGNC=24878 UniProtKB=Q9BVK6                                                                                                                                                                                                                                                                                                                                                  | Golgi vesicle budding                                                   |
| GO:0005813 | HUMAN HGNC=14313 UniProtKB=Q8WYAO,HUMAN HGNC=23432 UniProtKB=Q9NXG0,HUMAN HGNC=10252 UniProtKB=O75116,HUMAN HGNC=28959 UniProtKB=Q14008,HUMAN HGNC=9847 UniProtKB=P43487,HUMAN HGNC=5048 UniProtKB=Q00839,HUMAN HGNC=14906 UniProtKB=Q8N4C6,HUMAN HGNC=26281 UniProtKB=Q6ZN84,HUMAN HGNC=7910 UniProtKB=P06748,HUMAN HGNC=18994 UniProtKB=Q8TDC3,HUMAN HGNC=29262 UniProtKB=Q9P2H3 | centrosome                                                              |
| GO:0006836 | HUMAN HGNC=16937 UniProtKB=O75915                                                                                                                                                                                                                                                                                                                                                  | neurotransmitter transport                                              |
| GO:0030518 | HUMAN HGNC=11283 UniProtKB=P12931                                                                                                                                                                                                                                                                                                                                                  | intracellular steroid hormone receptor signaling pathway                |
| GO:0016569 | HUMAN HGNC=4861 UniProtKB=Q9NRZ9                                                                                                                                                                                                                                                                                                                                                   | covalent chromatin modification                                         |

|            |                                                                                                                                                                                                                                                                                                                                                                                                                                                                                                                                                                                                                              |                                           |
|------------|------------------------------------------------------------------------------------------------------------------------------------------------------------------------------------------------------------------------------------------------------------------------------------------------------------------------------------------------------------------------------------------------------------------------------------------------------------------------------------------------------------------------------------------------------------------------------------------------------------------------------|-------------------------------------------|
| GO:0019888 | HUMAN HGNC=1173 UniProtKB=Q5H9R7,HUMAN HGNC=9302 UniProtKB=P30153,HUMAN HGNC=9308 UniProtKB=Q15257,HUMAN HGNC=9304 UniProtKB=P63151                                                                                                                                                                                                                                                                                                                                                                                                                                                                                          | protein phosphatase regulator activity    |
| GO:0008417 | HUMAN HGNC=14683 UniProtKB=Q9Y2G5<br>HUMAN HGNC=24526 UniProtKB=Q6DD88,HUMAN HGNC=6631 UniProtKB=P49257,HUMAN HGNC=25541 UniProtKB=P57088,HUMAN HGNC=12649 UniProtKB=O95292,HUMAN HGNC=11231 UniProtKB=Q8WXF7,HUMAN HGNC=12648 UniProtKB=Q9P0L0<br>HUMAN HGNC=3530 UniProtKB=P00748,HUMAN HGNC=5141 UniProtKB=P00738,HUMAN HGNC=21265 UniProtKB=Q9NZP8,HUMAN HGNC=5156 UniProtKB=P00739                                                                                                                                                                                                                                      | fucosyltransferase activity               |
| GO:0007029 |                                                                                                                                                                                                                                                                                                                                                                                                                                                                                                                                                                                                                              | endoplasmic reticulum organization        |
| GO:0031638 |                                                                                                                                                                                                                                                                                                                                                                                                                                                                                                                                                                                                                              | zymogen activation                        |
| PC00173    | HUMAN HGNC=18344 UniProtKB=Q9BX68                                                                                                                                                                                                                                                                                                                                                                                                                                                                                                                                                                                            | nucleotide phosphatase                    |
| GO:1901363 | HUMAN HGNC=11834 UniProtKB=P29401,HUMAN HGNC=9723 UniProtKB=P11216,HUMAN HGNC=9725 UniProtKB=P06737                                                                                                                                                                                                                                                                                                                                                                                                                                                                                                                          | heterocyclic compound binding             |
| GO:0000781 | HUMAN HGNC=26200 UniProtKB=Q9H668                                                                                                                                                                                                                                                                                                                                                                                                                                                                                                                                                                                            | chromosome, telomeric region              |
| GO:0019432 | HUMAN HGNC=14451 UniProtKB=Q9BQK8                                                                                                                                                                                                                                                                                                                                                                                                                                                                                                                                                                                            | triglyceride biosynthetic process         |
| GO:0009113 | HUMAN HGNC=626 UniProtKB=P07741,HUMAN HGNC=5157 UniProtKB=P00492                                                                                                                                                                                                                                                                                                                                                                                                                                                                                                                                                             | purine nucleobase biosynthetic process    |
| GO:0033962 | HUMAN HGNC=17259 UniProtKB=Q9Y4Z0                                                                                                                                                                                                                                                                                                                                                                                                                                                                                                                                                                                            | cytoplasmic mRNA processing body assembly |
| GO:0006612 | HUMAN HGNC=30389 UniProtKB=Q96A65,HUMAN HGNC=7629 UniProtKB=E9PAV3                                                                                                                                                                                                                                                                                                                                                                                                                                                                                                                                                           | protein targeting to membrane             |
| GO:0034220 | HUMAN HGNC=16804 UniProtKB=O00308                                                                                                                                                                                                                                                                                                                                                                                                                                                                                                                                                                                            | ion transmembrane transport               |
| GO:0008654 | HUMAN HGNC=9141 UniProtKB=Q15126                                                                                                                                                                                                                                                                                                                                                                                                                                                                                                                                                                                             | phospholipid biosynthetic process         |
| GO:0034968 | HUMAN HGNC=9349 UniProtKB=Q9NQX1                                                                                                                                                                                                                                                                                                                                                                                                                                                                                                                                                                                             | histone lysine methylation                |
| GO:0008250 | HUMAN HGNC=10381 UniProtKB=P04843,HUMAN HGNC=10382 UniProtKB=P04844,HUMAN HGNC=2728 UniProtKB=P39656<br>HUMAN HGNC=18756 UniProtKB=Q9BYZ6,HUMAN HGNC=9802 UniProtKB=P15153,HUMAN HGNC=9801 UniProtKB=P63000,HUMAN HGNC=243 UniProtKB=P35611,HUMAN HGNC=17905 UniProtKB=Q9Y613,HUMAN HGNC=1738 UniProtKB=Q9Y5S2<br>HUMAN HGNC=3338 UniProtKB=Q14247,HUMAN HGNC=15474 UniProtKB=Q9Y566,HUMAN HGNC=2695 UniProtKB=Q16643,HUMAN HGNC=2974 UniProtKB=P50570,HUMAN HGNC=243 UniProtKB=P35611,HUMAN HGNC=29125 UniProtKB=Q9UQ16,HUMAN HGNC=2696 UniProtKB=Q9UJU6,HUMAN HGNC=4844 UniProtKB=P14317,HUMAN HGNC=14294 UniProtKB=Q9BYB0 | oligosaccharyltransferase complex         |
| GO:0005856 |                                                                                                                                                                                                                                                                                                                                                                                                                                                                                                                                                                                                                              | cytoskeleton                              |
| GO:0014069 |                                                                                                                                                                                                                                                                                                                                                                                                                                                                                                                                                                                                                              | postsynaptic density                      |
| GO:0042773 | HUMAN HGNC=7421 UniProtKB=P00403                                                                                                                                                                                                                                                                                                                                                                                                                                                                                                                                                                                             | ATP synthesis coupled electron transport  |
| GO:0042165 | HUMAN HGNC=16768 UniProtKB=O60391<br>HUMAN HGNC=3338 UniProtKB=Q14247,HUMAN HGNC=2695 UniProtKB=Q16643,HUMAN HGNC=2696 UniProtKB=Q9UJU6,HUMAN HGNC=4844 UniProtKB=P14317                                                                                                                                                                                                                                                                                                                                                                                                                                                     | neurotransmitter binding                  |
| GO:0048675 |                                                                                                                                                                                                                                                                                                                                                                                                                                                                                                                                                                                                                              | axon extension                            |
| GO:0005876 | HUMAN HGNC=5048 UniProtKB=Q00839<br>HUMAN HGNC=418 UniProtKB=P09972,HUMAN HGNC=414 UniProtKB=P04075,HUMAN HGNC=11559 UniProtKB=P37837                                                                                                                                                                                                                                                                                                                                                                                                                                                                                        | spindle microtubule                       |
| PC00044    |                                                                                                                                                                                                                                                                                                                                                                                                                                                                                                                                                                                                                              | aldolase                                  |

|           |                                                                                                                                                                                                                                                                                                                                                                                                                                                                                                                                                                                                                                                                                                                                                                                                                                                                                                                                                                                                                                                                                                                                                                                                                                                                                                                                                                                                                                                                                                                                                                                                                                                                                                                                                                                                                                                                                                                                                                                                                                                                                                                                                                                                                                                                                                                                                                                                                |                               |
|-----------|----------------------------------------------------------------------------------------------------------------------------------------------------------------------------------------------------------------------------------------------------------------------------------------------------------------------------------------------------------------------------------------------------------------------------------------------------------------------------------------------------------------------------------------------------------------------------------------------------------------------------------------------------------------------------------------------------------------------------------------------------------------------------------------------------------------------------------------------------------------------------------------------------------------------------------------------------------------------------------------------------------------------------------------------------------------------------------------------------------------------------------------------------------------------------------------------------------------------------------------------------------------------------------------------------------------------------------------------------------------------------------------------------------------------------------------------------------------------------------------------------------------------------------------------------------------------------------------------------------------------------------------------------------------------------------------------------------------------------------------------------------------------------------------------------------------------------------------------------------------------------------------------------------------------------------------------------------------------------------------------------------------------------------------------------------------------------------------------------------------------------------------------------------------------------------------------------------------------------------------------------------------------------------------------------------------------------------------------------------------------------------------------------------------|-------------------------------|
| GO:000625 |                                                                                                                                                                                                                                                                                                                                                                                                                                                                                                                                                                                                                                                                                                                                                                                                                                                                                                                                                                                                                                                                                                                                                                                                                                                                                                                                                                                                                                                                                                                                                                                                                                                                                                                                                                                                                                                                                                                                                                                                                                                                                                                                                                                                                                                                                                                                                                                                                |                               |
| 9         | HUMAN   HGNC=4861   UniProtKB=Q9NRZ9                                                                                                                                                                                                                                                                                                                                                                                                                                                                                                                                                                                                                                                                                                                                                                                                                                                                                                                                                                                                                                                                                                                                                                                                                                                                                                                                                                                                                                                                                                                                                                                                                                                                                                                                                                                                                                                                                                                                                                                                                                                                                                                                                                                                                                                                                                                                                                           | DNA metabolic process         |
| GO:000636 |                                                                                                                                                                                                                                                                                                                                                                                                                                                                                                                                                                                                                                                                                                                                                                                                                                                                                                                                                                                                                                                                                                                                                                                                                                                                                                                                                                                                                                                                                                                                                                                                                                                                                                                                                                                                                                                                                                                                                                                                                                                                                                                                                                                                                                                                                                                                                                                                                | transcription initiation from |
| 7         | HUMAN   HGNC=19985   UniProtKB=P53999, HUMAN   HGNC=17305   UniProtKB=Q9Y6J9<br>HUMAN   HGNC=4127   UniProtKB=Q7Z7M9, HUMAN   HGNC=24293   UniProtKB=Q70JA7, HUMAN   HGNC=10382   UniProtKB=P04844, HUMAN   HGNC=2728   UniProtKB=P39656, HUMAN   HGNC=30611   UniProtKB=Q8TCJ2, HUMAN   HGNC=9725   UniProtKB=P06737, HUMAN   HGNC=4699   UniProtKB=P46976, HUMAN   HGNC=10381   UniProtKB=P04843, HUMAN   HGNC=17973   UniProtKB=Q9P109, HUMAN   HGNC=3148   UniProtKB=P19971, HUMAN   HGNC=9723   UniProtKB=P11216, HUMAN   HGNC=5157   UniProtKB=P00492, HUMAN   HGNC=15663   UniProtKB=Q9NYU2, HUMAN   HGNC=14683   UniProtKB=Q9Y2G5                                                                                                                                                                                                                                                                                                                                                                                                                                                                                                                                                                                                                                                                                                                                                                                                                                                                                                                                                                                                                                                                                                                                                                                                                                                                                                                                                                                                                                                                                                                                                                                                                                                                                                                                                                      | RNA polymerase II promoter    |
| PC00111   | HUMAN   HGNC=25951   UniProtKB=Q6ULP2, HUMAN   Gene=SEP15   UniProtKB=O60613, HUMAN   HGNC=9784   UniProtKB=P61020, HUMAN   HGNC=11834   UniProtKB=P29401, HUMAN   HGNC=555   UniProtKB=O43747, HUMAN   HGNC=813   UniProtKB=Q93084, HUMAN   HGNC=13487   UniProtKB=Q96QK1, HUMAN   HGNC=463   UniProtKB=Q9UKV5, HUMAN   HGNC=11445   UniProtKB=Q15833, HUMAN   HGNC=9756   UniProtKB=O00391, HUMAN   HGNC=15453   UniProtKB=Q9H3P7, HUMAN   HGNC=9761   UniProtKB=Q15907, HUMAN   HGNC=10996   UniProtKB=O14975, HUMAN   HGNC=9785   UniProtKB=P51148, HUMAN   HGNC=2230   UniProtKB=P53621, HUMAN   HGNC=2431   UniProtKB=P55060, HUMAN   HGNC=16268   UniProtKB=Q8IY17, HUMAN   HGNC=9772   UniProtKB=Q13637, HUMAN   HGNC=24251   UniProtKB=Q9Y3A6, HUMAN   HGNC=8569   UniProtKB=P29122, HUMAN   HGNC=4606   UniProtKB=P30101, HUMAN   HGNC=25153   UniProtKB=Q96EY5, HUMAN   HGNC=9782   UniProtKB=P61018, HUMAN   HGNC=11446   UniProtKB=O00186, HUMAN   HGNC=11172   UniProtKB=Q13596, HUMAN   HGNC=16499   UniProtKB=Q96DA2, HUMAN   HGNC=16075   UniProtKB=Q9H082, HUMAN   HGNC=11442   UniProtKB=O15400, HUMAN   HGNC=9852   UniProtKB=O95373, HUMAN   HGNC=16090   UniProtKB=O00264, HUMAN   HGNC=11740   UniProtKB=P02787, HUMAN   HGNC=16996   UniProtKB=Q15363, HUMAN   HGNC=30384   UniProtKB=Q9UMX5, HUMAN   HGNC=7007   UniProtKB=P61006, HUMAN   HGNC=14902   UniProtKB=Q9NRW1, HUMAN   HGNC=26212   UniProtKB=P61009, HUMAN   HGNC=9935   UniProtKB=Q14257, HUMAN   HGNC=11984   UniProtKB=Q6ZVM7, HUMAN   HGNC=15999   UniProtKB=Q9NZV5, HUMAN   HGNC=23186   UniProtKB=Q14677, HUMAN   HGNC=8016   UniProtKB=P46459, HUMAN   HGNC=16524   UniProtKB=P61106, HUMAN   HGNC=20726   UniProtKB=Q8WVM8, HUMAN   HGNC=1458   UniProtKB=O43852, HUMAN   HGNC=13529   UniProtKB=Q9Y2B0, HUMAN   HGNC=2532   UniProtKB=P08311, HUMAN   HGNC=5238   UniProtKB=P11021, HUMAN   HGNC=16998   UniProtKB=P49755, HUMAN   HGNC=11357   UniProtKB=Q92783, HUMAN   HGNC=3419   UniProtKB=P42566, HUMAN   HGNC=16695   UniProtKB=P51572, HUMAN   HGNC=30167   UniProtKB=P13667, HUMAN   HGNC=8761   UniProtKB=Q9BUL8, HUMAN   HGNC=20954   UniProtKB=Q9NP79, HUMAN   HGNC=15461   UniProtKB=P55145, HUMAN   HGNC=21354   UniProtKB=Q86XR7, HUMAN   HGNC=24634   UniProtKB=Q9UBC2, HUMAN   HGNC=1546   UniProtKB=P50454, HUMAN   HGNC=30220   UniProtKB=Q96AA3, HUMAN   HGNC=3530   UniProtKB=P00748, HUMAN | glycosyltransferase           |
| GO:000577 |                                                                                                                                                                                                                                                                                                                                                                                                                                                                                                                                                                                                                                                                                                                                                                                                                                                                                                                                                                                                                                                                                                                                                                                                                                                                                                                                                                                                                                                                                                                                                                                                                                                                                                                                                                                                                                                                                                                                                                                                                                                                                                                                                                                                                                                                                                                                                                                                                |                               |
| 3         |                                                                                                                                                                                                                                                                                                                                                                                                                                                                                                                                                                                                                                                                                                                                                                                                                                                                                                                                                                                                                                                                                                                                                                                                                                                                                                                                                                                                                                                                                                                                                                                                                                                                                                                                                                                                                                                                                                                                                                                                                                                                                                                                                                                                                                                                                                                                                                                                                | vacuole                       |

|                |                                                                                                                                                                                                                                                                                                                                                                                                                                                                                                                                                                                                                                                                                                                                                                                                                                                                                                                                                                                                                                                                                                                                                                                                                                                                                                                                                                                                                                                                                                                                                                                                                                                                                                                                                                                                                                                                                                                                                                                                                                                                                                                                                                                                                                                                                                                                                                    |                                       |
|----------------|--------------------------------------------------------------------------------------------------------------------------------------------------------------------------------------------------------------------------------------------------------------------------------------------------------------------------------------------------------------------------------------------------------------------------------------------------------------------------------------------------------------------------------------------------------------------------------------------------------------------------------------------------------------------------------------------------------------------------------------------------------------------------------------------------------------------------------------------------------------------------------------------------------------------------------------------------------------------------------------------------------------------------------------------------------------------------------------------------------------------------------------------------------------------------------------------------------------------------------------------------------------------------------------------------------------------------------------------------------------------------------------------------------------------------------------------------------------------------------------------------------------------------------------------------------------------------------------------------------------------------------------------------------------------------------------------------------------------------------------------------------------------------------------------------------------------------------------------------------------------------------------------------------------------------------------------------------------------------------------------------------------------------------------------------------------------------------------------------------------------------------------------------------------------------------------------------------------------------------------------------------------------------------------------------------------------------------------------------------------------|---------------------------------------|
|                | MAN HGNC=9786 UniProtKB=P20340,HUMAN HGNC=17103 UniProtKB=Q9Y5L0,HUMAN HGNC=9164 UniProtKB=Q99719,HUMAN HGNC=10534 UniProtKB=Q9NR31,HUMAN HGNC=15588 UniProtKB=Q96C24,HUMAN HGNC=6631 UniProtKB=P49257,HUMAN HGNC=649 UniProtKB=P48444,HUMAN HGNC=18370 UniProtKB=Q9H0U4,HUMAN HGNC=24641 UniProtKB=Q7Z3J2,HUMAN HGNC=19983 UniProtKB=Q86YS6,HUMAN HGNC=12666 UniProtKB=P55072,HUMAN HGNC=10382 UniProtKB=P04844,HUMAN HGNC=9411 UniProtKB=P14314,HUMAN HGNC=17943 UniProtKB=Q9GZP9,HUMAN HGNC=6752 UniProtKB=P20645,HUMAN HGNC=15606 UniProtKB=Q9UHA4,HUMAN HGNC=24175 UniProtKB=Q9P035,HUMAN HGNC=16089 UniProtKB=O15173,HUMAN HGNC=8533 UniProtKB=P51575,HUMAN HGNC=17059 UniProtKB=Q9NTJ5,HUMAN HGNC=11358 UniProtKB=O75886,HUMAN HGNC=17859 UniProtKB=Q5SRE5,HUMAN HGNC=25541 UniProtKB=P57088,HUMAN HGNC=2090 UniProtKB=P09496,HUMAN HGNC=8515 UniProtKB=Q9HC10,HUMAN HGNC=30052 UniProtKB=Q8TEM1,HUMAN HGNC=9778 UniProtKB=P20337,HUMAN HGNC=8548 UniProtKB=P07237,HUMAN HGNC=568 UniProtKB=O14617,HUMAN HGNC=18673 UniProtKB=Q96JB5,HUMAN HGNC=1473 UniProtKB=P27824,HUMAN HGNC=8504 UniProtKB=Q969R2,HUMAN HGNC=3244 UniProtKB=Q9NZN3,HUMAN HGNC=11510 UniProtKB=Q8N9I0,HUMAN HGNC=13921 UniProtKB=O95870,HUMAN HGNC=12649 UniProtKB=O95292,HUMAN HGNC=20653 UniProtKB=Q8IVB4,HUMAN HGNC=26486 UniProtKB=Q6PJW8,HUMAN HGNC=30550 UniProtKB=O60337,HUMAN HGNC=4248 UniProtKB=Q92820,HUMAN HGNC=2689 UniProtKB=P09172,HUMAN HGNC=10701 UniProtKB=Q15436,HUMAN HGNC=11326 UniProtKB=P51571,HUMAN HGNC=4298 UniProtKB=P16278,HUMAN HGNC=8062 UniProtKB=P49790,HUMAN HGNC=9758 UniProtKB=P62820,HUMAN HGNC=2232 UniProtKB=P35606,HUMAN HGNC=561 UniProtKB=O95782,HUMAN HGNC=11512 UniProtKB=Q9H2B2,HUMAN HGNC=18263 UniProtKB=Q9UL25,HUMAN HGNC=812 UniProtKB=P16615,HUMAN HGNC=692 UniProtKB=P40616,HUMAN HGNC=31332 UniProtKB=Q6IQ22,HUMAN HGNC=18587 UniProtKB=O94901,HUMAN HGNC=18621 UniProtKB=Q9Y2V7,HUMAN HGNC=1455 UniProtKB=P27797,HUMAN HGNC=2231 UniProtKB=P53618,HUMAN HGNC=2728 UniProtKB=P39656,HUMAN HGNC=17643 UniProtKB=Q9HD26,HUMAN HGNC=20175 UniProtKB=Q9Y3E0,HUMAN HGNC=12648 UniProtKB=Q9P0L0,HUMAN HGNC=1801 UniProtKB=O95674,HUMAN HGNC=10381 UniProtKB=P04843,HUMAN HGNC=11429 UniProtKB=O75558,HUMAN HGNC=9847 UniProtKB=P43487,HUMAN HGNC=15663 UniProtKB=Q9NYU2,HUMAN HGNC=24878 UniProtKB=Q9BVK6,HUMAN HGNC=9767 UniProtKB=O00194 |                                       |
| GO:009719<br>1 | HUMAN HGNC=1050 UniProtKB=P55957,HUMAN HGNC=17712 UniProtKB=O15304,HUMAN HGNC=11283 UniProtKB=P12931                                                                                                                                                                                                                                                                                                                                                                                                                                                                                                                                                                                                                                                                                                                                                                                                                                                                                                                                                                                                                                                                                                                                                                                                                                                                                                                                                                                                                                                                                                                                                                                                                                                                                                                                                                                                                                                                                                                                                                                                                                                                                                                                                                                                                                                               | extrinsic apoptotic signaling pathway |
| GO:000638<br>8 | HUMAN HGNC=28422 UniProtKB=Q8NCE0                                                                                                                                                                                                                                                                                                                                                                                                                                                                                                                                                                                                                                                                                                                                                                                                                                                                                                                                                                                                                                                                                                                                                                                                                                                                                                                                                                                                                                                                                                                                                                                                                                                                                                                                                                                                                                                                                                                                                                                                                                                                                                                                                                                                                                                                                                                                  | tRNA splicing, via                    |
|                | HUMAN HGNC=25951 UniProtKB=Q6ULP2,HUMAN HGNC=555 UniProtKB=O43747,HUMAN HGNC=568 UniProtKB=O14617,HUMAN HGNC=561 UniProtKB=O95782                                                                                                                                                                                                                                                                                                                                                                                                                                                                                                                                                                                                                                                                                                                                                                                                                                                                                                                                                                                                                                                                                                                                                                                                                                                                                                                                                                                                                                                                                                                                                                                                                                                                                                                                                                                                                                                                                                                                                                                                                                                                                                                                                                                                                                  | endonucleolytic cleavage and ligation |
| GO:003011<br>9 |                                                                                                                                                                                                                                                                                                                                                                                                                                                                                                                                                                                                                                                                                                                                                                                                                                                                                                                                                                                                                                                                                                                                                                                                                                                                                                                                                                                                                                                                                                                                                                                                                                                                                                                                                                                                                                                                                                                                                                                                                                                                                                                                                                                                                                                                                                                                                                    | AP-type membrane coat adaptor complex |

|            |                                                                                                                                                                                                                                            |                                                                         |
|------------|--------------------------------------------------------------------------------------------------------------------------------------------------------------------------------------------------------------------------------------------|-------------------------------------------------------------------------|
| GO:0043124 | HUMAN HGNC=29890 UniProtKB=Q86UT6,HUMAN HGNC=9275 UniProtKB=P35813                                                                                                                                                                         | negative regulation of I-kappaB kinase/NF-kappaB signaling              |
| GO:0072329 | HUMAN HGNC=3579 UniProtKB=P16930,HUMAN HGNC=8891 UniProtKB=P52209                                                                                                                                                                          | monocarboxylic acid catabolic process                                   |
| GO:0061844 | HUMAN HGNC=8601 UniProtKB=Q06141,HUMAN HGNC=9240 UniProtKB=P02775,HUMAN HGNC=2761 UniProtKB=P59665,HUMAN HGNC=8862 UniProtKB=P10720,HUMAN HGNC=8861 UniProtKB=P02776,HUMAN HGNC=1472 UniProtKB=P49913                                      | antimicrobial humoral immune response mediated by antimicrobial peptide |
| GO:0007166 | HUMAN HGNC=3616 UniProtKB=P12318,HUMAN HGNC=8823 UniProtKB=P16284,HUMAN HGNC=6871 UniProtKB=P28482,HUMAN HGNC=533 UniProtKB=P04083,HUMAN HGNC=1628 UniProtKB=P08571,HUMAN HGNC=12203 UniProtKB=A0A075B6N3,HUMAN HGNC=6517 UniProtKB=P18428 | cell surface receptor signaling pathway                                 |
| GO:0000422 | HUMAN HGNC=21689 UniProtKB=Q9Y3D6,HUMAN HGNC=2973 UniProtKB=O00429                                                                                                                                                                         | autophagy of mitochondrion                                              |
| GO:0051650 | HUMAN HGNC=9767 UniProtKB=O00194                                                                                                                                                                                                           | establishment of vesicle localization                                   |
| GO:0030173 | HUMAN HGNC=8569 UniProtKB=P29122,HUMAN HGNC=9756 UniProtKB=O00391                                                                                                                                                                          | integral component of Golgi membrane                                    |
| GO:0010769 | HUMAN HGNC=6616 UniProtKB=P48059                                                                                                                                                                                                           | regulation of cell morphogenesis involved in differentiation            |
| GO:0090502 | HUMAN HGNC=20165 UniProtKB=Q9P2P1                                                                                                                                                                                                          | RNA phosphodiester bond hydrolysis, endonucleolytic                     |
| PC00237    | HUMAN HGNC=39025 UniProtKB=Q9QC07,HUMAN Gene=ENH1_                                                                                                                                                                                         | viral or transposable element protein                                   |
| PC00185    | HUMAN UniProtKB=Q9N2K0                                                                                                                                                                                                                     |                                                                         |
| GO:0007224 | HUMAN HGNC=8783 UniProtKB=Q08499,HUMAN HGNC=21416 UniProtKB=Q92485,HUMAN HGNC=8784 UniProtKB=O76074                                                                                                                                        | phosphodiesterase smoothened signaling pathway                          |
| GO:0043436 | HUMAN HGNC=11119 UniProtKB=Q99835                                                                                                                                                                                                          |                                                                         |
| GO:0006826 | HUMAN HGNC=13420 UniProtKB=Q86TP1                                                                                                                                                                                                          | oxoacid metabolic process                                               |
| GO:0099512 | HUMAN HGNC=11740 UniProtKB=P02787,HUMAN HGNC=2295 UniProtKB=P00450,HUMAN HGNC=11763 UniProtKB=P02786                                                                                                                                       | iron ion transport                                                      |
| GO:0055037 | HUMAN HGNC=2209 UniProtKB=P20908                                                                                                                                                                                                           | supramolecular fiber                                                    |
| GO:0006518 | HUMAN HGNC=3244 UniProtKB=Q9NZN3,HUMAN HGNC=11740 UniProtKB=P02787,HUMAN HGNC=20653 UniProtKB=Q8IVB4,HUMAN HGNC=9761 UniProtKB=Q15907                                                                                                      | recycling endosome                                                      |
| GO:0004629 | HUMAN HGNC=7900 UniProtKB=P55786,HUMAN HGNC=5381 UniProtKB=P14735,HUMAN HGNC=8569 UniProtKB=P29122,HUMAN HGNC=18173 UniProtKB=Q9NZ08,HUMAN HGNC=2312 UniProtKB=P15169                                                                      | peptide metabolic process                                               |
| GO:0003725 | HUMAN HGNC=9055 UniProtKB=Q00722                                                                                                                                                                                                           | phospholipase C activity                                                |
| GO:0030509 | HUMAN HGNC=8087 UniProtKB=P29728,HUMAN HGNC=226 UniProtKB=P78563,HUMAN HGNC=17904 UniProtKB=Q9NRR4,HUMAN HGNC=6038 UniProtKB=Q12906,HUMAN HGNC=3285 UniProtKB=P23588                                                                       | double-stranded RNA binding                                             |
| GO:0032990 | HUMAN HGNC=6767 UniProtKB=Q15797,HUMAN HGNC=11766 UniProtKB=P01137                                                                                                                                                                         | BMP signaling pathway                                                   |
|            | HUMAN HGNC=6047 UniProtKB=Q16891                                                                                                                                                                                                           | cell part morphogenesis                                                 |

|           |   |                                                                                                                                                                                                                                                                                                                                                                                                                                                                                                                                                                                                                      |                                                                   |
|-----------|---|----------------------------------------------------------------------------------------------------------------------------------------------------------------------------------------------------------------------------------------------------------------------------------------------------------------------------------------------------------------------------------------------------------------------------------------------------------------------------------------------------------------------------------------------------------------------------------------------------------------------|-------------------------------------------------------------------|
| GO:003586 | 1 | HUMAN HGNC=26200 UniProtKB=Q9H668                                                                                                                                                                                                                                                                                                                                                                                                                                                                                                                                                                                    | site of double-strand break                                       |
| GO:000639 | 6 | HUMAN HGNC=226 UniProtKB=P78563,HUMAN HGNC=17904 UniProtKB=Q9NRR4                                                                                                                                                                                                                                                                                                                                                                                                                                                                                                                                                    | RNA processing                                                    |
| GO:000575 | 9 | HUMAN HGNC=5269 UniProtKB=P61604,HUMAN HGNC=5261 UniProtKB=P10809,HUMAN HGNC=2422 UniProtKB=O75390,HUMAN HGNC=4801 UniProtKB=P40939                                                                                                                                                                                                                                                                                                                                                                                                                                                                                  | mitochondrial matrix                                              |
| GO:000679 | 0 | HUMAN HGNC=3189 UniProtKB=P68104,HUMAN HGNC=7413 UniProtKB=Q13126,HUMAN HGNC=4622 UniProtKB=Q8IYD1,HUMAN HGNC=4621 UniProtKB=P15170,HUMAN HGNC=3200 UniProtKB=Q5VTE0,HUMAN HGNC=343 UniProtKB=P23526,HUMAN HGNC=12388 UniProtKB=Q16762,HUMAN HGNC=7223 UniProtKB=P25325                                                                                                                                                                                                                                                                                                                                              | sulfur compound metabolic process                                 |
| GO:001000 | 8 | HUMAN HGNC=11172 UniProtKB=Q13596,HUMAN HGNC=3244 UniProtKB=Q9NZN3,HUMAN HGNC=568 UniProtKB=O14617                                                                                                                                                                                                                                                                                                                                                                                                                                                                                                                   | endosome membrane                                                 |
| GO:000716 | 5 | HUMAN HGNC=8510 UniProtKB=Q92882,HUMAN HGNC=8783 UniProtKB=Q08499,HUMAN HGNC=28817 UniProtKB=Q96AG4,HUMAN HGNC=11984 UniProtKB=Q6ZVM7,HUMAN HGNC=10464 UniProtKB=Q15404,HUMAN HGNC=11358 UniProtKB=O75886,HUMAN HGNC=7967 UniProtKB=Q96RI1,HUMAN HGNC=6050 UniProtKB=P29218,HUMAN HGNC=15842 UniProtKB=Q96RT1,HUMAN HGNC=8784 UniProtKB=O76074                                                                                                                                                                                                                                                                       | signal transduction                                               |
| GO:000504 | 8 | HUMAN HGNC=6401 UniProtKB=Q92973,HUMAN HGNC=8062 UniProtKB=P49790,HUMAN HGNC=6396 UniProtKB=O00505,HUMAN HGNC=6400 UniProtKB=Q14974                                                                                                                                                                                                                                                                                                                                                                                                                                                                                  | signal sequence binding                                           |
| GO:000574 | 6 | HUMAN HGNC=7687 UniProtKB=O00483,HUMAN HGNC=2265 UniProtKB=P13073,HUMAN HGNC=2288 UniProtKB=P14406,HUMAN HGNC=2267 UniProtKB=P20674                                                                                                                                                                                                                                                                                                                                                                                                                                                                                  | mitochondrial respirasome                                         |
| GO:000718 | 6 | HUMAN HGNC=711 UniProtKB=P49407,HUMAN HGNC=4398 UniProtKB=P62879,HUMAN HGNC=10632 UniProtKB=P13501,HUMAN HGNC=20731 UniProtKB=Q9HAV0,HUMAN HGNC=3964 UniProtKB=P01225,HUMAN HGNC=16452 UniProtKB=P0DN86,HUMAN HGNC=16721 UniProtKB=A6NKKQ9,HUMAN HGNC=4396 UniProtKB=P62873                                                                                                                                                                                                                                                                                                                                          | G protein-coupled receptor signaling pathway                      |
| GO:001046 | 8 | HUMAN HGNC=8648 UniProtKB=Q15366,HUMAN HGNC=6871 UniProtKB=P28482,HUMAN HGNC=5036 UniProtKB=Q14103,HUMAN HGNC=6876 UniProtKB=Q16539,HUMAN HGNC=13506 UniProtKB=Q8TBJ5                                                                                                                                                                                                                                                                                                                                                                                                                                                | regulation of gene expression                                     |
| GO:005082 | 1 | HUMAN HGNC=5253 UniProtKB=P07900,HUMAN HGNC=5258 UniProtKB=P08238,HUMAN HGNC=1735 UniProtKB=Q16543                                                                                                                                                                                                                                                                                                                                                                                                                                                                                                                   | protein stabilization                                             |
| GO:000167 | 1 | HUMAN HGNC=806 UniProtKB=P54709                                                                                                                                                                                                                                                                                                                                                                                                                                                                                                                                                                                      | ATPase activator activity                                         |
| GO:004316 | 1 | HUMAN HGNC=9545 UniProtKB=P28062,HUMAN HGNC=9533 UniProtKB=P25789,HUMAN HGNC=15713 UniProtKB=Q9UJX4,HUMAN HGNC=9554 UniProtKB=Q99460,HUMAN HGNC=2717 UniProtKB=Q16531,HUMAN HGNC=9813 UniProtKB=P54727,HUMAN HGNC=16804 UniProtKB=O00308,HUMAN HGNC=9559 UniProtKB=Q13200,HUMAN HGNC=9531 UniProtKB=P25787,HUMAN HGNC=9535 UniProtKB=P60900,HUMAN HGNC=9539 UniProtKB=P49721,HUMAN HGNC=9536 UniProtKB=O14818,HUMAN HGNC=9540 UniProtKB=P49720,HUMAN HGNC=15912 UniProtKB=Q9UNZ2,HUMAN HGNC=9530 UniProtKB=P25786,HUMAN HGNC=9565 UniProtKB=P51665,HUMAN HGNC=9532 UniProtKB=P25788,HUMAN HGNC=9537 UniProtKB=P20618 | proteasome-mediated ubiquitin-dependent protein catabolic process |

|            |                                                                                                                                                                                                                                                                                                                                                                                                                                                                                                                                                                                                                                                                                                                                                                                                                                                                                                                                    |                                                           |
|------------|------------------------------------------------------------------------------------------------------------------------------------------------------------------------------------------------------------------------------------------------------------------------------------------------------------------------------------------------------------------------------------------------------------------------------------------------------------------------------------------------------------------------------------------------------------------------------------------------------------------------------------------------------------------------------------------------------------------------------------------------------------------------------------------------------------------------------------------------------------------------------------------------------------------------------------|-----------------------------------------------------------|
| GO:0015850 | HUMAN HGNC=9922 UniProtKB=P02753,HUMAN HGNC=11510 UniProtKB=Q8N9I0,HUMAN HGNC=11512 UniProtKB=Q9H2B2<br>HUMAN HGNC=6891 UniProtKB=Q15555,HUMAN HGNC=18587 UniProtKB=Q94901,HUMAN HGNC=6890 UniProtKB=Q15691,HUMAN HGNC=12022 UniProtKB=P13693,HUMAN HGNC=28959 UniProtKB=Q14008,HUMAN HGNC=6835 UniProtKB=P78559,HUMAN HGNC=1990 UniProtKB=Q8WWK9                                                                                                                                                                                                                                                                                                                                                                                                                                                                                                                                                                                  | organic hydroxy compound transport                        |
| PC00166    | HUMAN HGNC=18756 UniProtKB=Q9BYZ6,HUMAN HGNC=9862 UniProtKB=P61225,HUMAN HGNC=9801 UniProtKB=P63000,HUMAN HGNC=6407 UniProtKB=P01116,HUMAN HGNC=669 UniProtKB=P08134,HUMAN HGNC=9857 UniProtKB=P61224,HUMAN HGNC=10447 UniProtKB=P10301,HUMAN HGNC=667 UniProtKB=P61586,HUMAN HGNC=9855 UniProtKB=P62834,HUMAN HGNC=10011 UniProtKB=Q15382,HUMAN HGNC=9802 UniProtKB=P15153,HUMAN HGNC=1736 UniProtKB=P60953,HUMAN HGNC=9846 UniProtKB=P62826,HUMAN HGNC=9840 UniProtKB=P11234                                                                                                                                                                                                                                                                                                                                                                                                                                                     | non-motor microtubule binding protein                     |
| PC00208    |                                                                                                                                                                                                                                                                                                                                                                                                                                                                                                                                                                                                                                                                                                                                                                                                                                                                                                                                    | small GTPase                                              |
| GO:0000307 | HUMAN HGNC=24224 UniProtKB=Q9NYV4                                                                                                                                                                                                                                                                                                                                                                                                                                                                                                                                                                                                                                                                                                                                                                                                                                                                                                  | cyclin-dependent protein                                  |
| GO:0043021 | HUMAN HGNC=10372 UniProtKB=P05386,HUMAN HGNC=5048 UniProtKB=Q00839,HUMAN HGNC=3285 UniProtKB=P23588                                                                                                                                                                                                                                                                                                                                                                                                                                                                                                                                                                                                                                                                                                                                                                                                                                | kinase holoenzyme complex                                 |
| GO:0043065 | HUMAN HGNC=1504 UniProtKB=P42574,HUMAN HGNC=533 UniProtKB=P04083                                                                                                                                                                                                                                                                                                                                                                                                                                                                                                                                                                                                                                                                                                                                                                                                                                                                   | ribonucleoprotein complex binding                         |
| GO:0019722 |                                                                                                                                                                                                                                                                                                                                                                                                                                                                                                                                                                                                                                                                                                                                                                                                                                                                                                                                    | positive regulation of apoptotic process                  |
| GO:0009059 | HUMAN HGNC=9314 UniProtKB=Q08209                                                                                                                                                                                                                                                                                                                                                                                                                                                                                                                                                                                                                                                                                                                                                                                                                                                                                                   | calcium-mediated signaling                                |
|            | HUMAN HGNC=6517 UniProtKB=P18428                                                                                                                                                                                                                                                                                                                                                                                                                                                                                                                                                                                                                                                                                                                                                                                                                                                                                                   | macromolecule biosynthetic process                        |
|            | HUMAN HGNC=1441 UniProtKB=Q05682,HUMAN HGNC=12733 UniProtKB=Q9Y6W5,HUMAN HGNC=1488 UniProtKB=P52907,HUMAN HGNC=2696 UniProtKB=Q9UJU6,HUMAN HGNC=4620 UniProtKB=P06396,HUMAN HGNC=2252 UniProtKB=P31146,HUMAN HGNC=15750 UniProtKB=P60981,HUMAN HGNC=3338 UniProtKB=Q14247,HUMAN HGNC=3750 UniProtKB=Q13045,HUMAN HGNC=2254 UniProtKB=Q9ULV4,HUMAN HGNC=2253 UniProtKB=Q9BR76,HUMAN HGNC=6528 UniProtKB=P13796,HUMAN HGNC=27937 UniProtKB=Q6ZVH7,HUMAN HGNC=12690 UniProtKB=P09327,HUMAN HGNC=11148 UniProtKB=Q16658,HUMAN HGNC=2695 UniProtKB=Q16643,HUMAN HGNC=12754 UniProtKB=O75083,HUMAN HGNC=8881 UniProtKB=P07737,HUMAN HGNC=1874 UniProtKB=P23528,HUMAN HGNC=18304 UniProtKB=Q14019,HUMAN HGNC=6707 UniProtKB=P33241,HUMAN HGNC=26161 UniProtKB=P57737,HUMAN HGNC=9621 UniProtKB=Q6IBS0,HUMAN HGNC=243 UniProtKB=P35611,HUMAN HGNC=1491 UniProtKB=P47756,HUMAN HGNC=4844 UniProtKB=P14317,HUMAN HGNC=11554 UniProtKB=P37802 | non-motor actin binding protein                           |
| PC00165    | HUMAN HGNC=5241 UniProtKB=P11142,HUMAN HGNC=5239 UniProtKB=P17066,HUMAN HGNC=1735 UniProtKB=Q16543,HUMAN HGNC=5238 UniProtKB=P11021,HUMAN HGNC=5240 UniProtKB=P48741,HUMAN HGNC=11343 UniProtKB=P50502                                                                                                                                                                                                                                                                                                                                                                                                                                                                                                                                                                                                                                                                                                                             | heat shock protein binding                                |
| GO:0031072 |                                                                                                                                                                                                                                                                                                                                                                                                                                                                                                                                                                                                                                                                                                                                                                                                                                                                                                                                    | cellular calcium ion                                      |
| GO:0006874 | HUMAN HGNC=813 UniProtKB=Q93084,HUMAN HGNC=812 UniProtKB=P16615                                                                                                                                                                                                                                                                                                                                                                                                                                                                                                                                                                                                                                                                                                                                                                                                                                                                    | homeostasis                                               |
|            |                                                                                                                                                                                                                                                                                                                                                                                                                                                                                                                                                                                                                                                                                                                                                                                                                                                                                                                                    | nucleobase-containing small molecule biosynthetic process |
| GO:0034404 | HUMAN HGNC=5157 UniProtKB=P00492                                                                                                                                                                                                                                                                                                                                                                                                                                                                                                                                                                                                                                                                                                                                                                                                                                                                                                   |                                                           |

|                           |                                                                                                                                                                                                                                                                                                                                                                                                                                                                                                                                                                                                                                                                                                                                                                                                                                                                                                                                                                                                                                                                                                                                                                                                                                                                                                                               |                                                                                                   |
|---------------------------|-------------------------------------------------------------------------------------------------------------------------------------------------------------------------------------------------------------------------------------------------------------------------------------------------------------------------------------------------------------------------------------------------------------------------------------------------------------------------------------------------------------------------------------------------------------------------------------------------------------------------------------------------------------------------------------------------------------------------------------------------------------------------------------------------------------------------------------------------------------------------------------------------------------------------------------------------------------------------------------------------------------------------------------------------------------------------------------------------------------------------------------------------------------------------------------------------------------------------------------------------------------------------------------------------------------------------------|---------------------------------------------------------------------------------------------------|
| GO:190265<br>2            | HUMAN HGNC=5382 UniProtKB=O75874,HUMAN HGNC=5383 UniProtKB=P48735,HUMAN HGNC=5386 UniProtKB=P51553                                                                                                                                                                                                                                                                                                                                                                                                                                                                                                                                                                                                                                                                                                                                                                                                                                                                                                                                                                                                                                                                                                                                                                                                                            | secondary alcohol<br>metabolic process                                                            |
| GO:007038<br>2            | HUMAN HGNC=15588 UniProtKB=Q96C24,HUMAN HGNC=11512 UniProtKB=Q9H2B2<br>HUMAN HGNC=12405 UniProtKB=P02766,HUMAN HGNC=24254 UniProtKB=Q96CN7,HUMAN HGNC=1122 UniProtKB=P43251,HUMAN HGNC=343 UniProtKB=P23526,HUMAN HGNC=8903 UniProtKB=O95336                                                                                                                                                                                                                                                                                                                                                                                                                                                                                                                                                                                                                                                                                                                                                                                                                                                                                                                                                                                                                                                                                  | exocytic vesicle                                                                                  |
| PC00121<br>GO:004802<br>4 | HUMAN HGNC=9583 UniProtKB=P26599,HUMAN HGNC=5044 UniProtKB=P61978,HUMAN HGNC=24932 UniProtKB=Q9NZ63                                                                                                                                                                                                                                                                                                                                                                                                                                                                                                                                                                                                                                                                                                                                                                                                                                                                                                                                                                                                                                                                                                                                                                                                                           | hydrolase<br>regulation of mRNA splicing,<br>via spliceosome                                      |
| GO:001592<br>6            | HUMAN HGNC=15527 UniProtKB=Q86Z14                                                                                                                                                                                                                                                                                                                                                                                                                                                                                                                                                                                                                                                                                                                                                                                                                                                                                                                                                                                                                                                                                                                                                                                                                                                                                             | glucosidase activity                                                                              |
| GO:001051<br>7            | HUMAN HGNC=533 UniProtKB=P04083<br>HUMAN HGNC=14008 UniProtKB=Q9BW11,HUMAN HGNC=29353 UniProtKB=Q6PI77,HUMAN HGNC=7629 UniProtKB=E9PAV3                                                                                                                                                                                                                                                                                                                                                                                                                                                                                                                                                                                                                                                                                                                                                                                                                                                                                                                                                                                                                                                                                                                                                                                       | regulation of phospholipase<br>activity                                                           |
| PC00055                   | HUMAN HGNC=9621 UniProtKB=Q6IBS0,HUMAN HGNC=1908 UniProtKB=Q96RL7,HUMAN HGNC=11881 UniProtKB=P62328,HUMAN HGNC=23594 UniProtKB=Q709C8                                                                                                                                                                                                                                                                                                                                                                                                                                                                                                                                                                                                                                                                                                                                                                                                                                                                                                                                                                                                                                                                                                                                                                                         | basic helix-loop-helix<br>transcription factor                                                    |
| GO:005165<br>1            |                                                                                                                                                                                                                                                                                                                                                                                                                                                                                                                                                                                                                                                                                                                                                                                                                                                                                                                                                                                                                                                                                                                                                                                                                                                                                                                               | maintenance of location in<br>cell                                                                |
| GO:005127<br>9            | HUMAN HGNC=29884 UniProtKB=Q8TF42                                                                                                                                                                                                                                                                                                                                                                                                                                                                                                                                                                                                                                                                                                                                                                                                                                                                                                                                                                                                                                                                                                                                                                                                                                                                                             | regulation of release of<br>sequestered calcium ion<br>into cytosol                               |
| GO:004362<br>4            | HUMAN HGNC=7641 UniProtKB=P54920                                                                                                                                                                                                                                                                                                                                                                                                                                                                                                                                                                                                                                                                                                                                                                                                                                                                                                                                                                                                                                                                                                                                                                                                                                                                                              | cellular protein complex<br>disassembly                                                           |
| GO:000046<br>2            |                                                                                                                                                                                                                                                                                                                                                                                                                                                                                                                                                                                                                                                                                                                                                                                                                                                                                                                                                                                                                                                                                                                                                                                                                                                                                                                               | maturation of SSU-rRNA<br>from tricistronic rRNA<br>transcript (SSU-rRNA, 5.8S<br>rRNA, LSU-rRNA) |
| GO:003612<br>6            | HUMAN HGNC=8898 UniProtKB=P07205<br>HUMAN HGNC=5575 UniProtKB=A0A0B4J1V2,HUMAN HGNC=5645 UniProtKB=A0A0C4DH34,HUMAN HGNC=5549 UniProtKB=A0A0C4DH31,HUMAN HGNC=5554 UniProtKB=P01743,HUMAN HGNC=5480 UniProtKB=P01880,HUMAN HGNC=5659 UniProtKB=A0A0C4DH38,HUMAN HGNC=5634 UniProtKB=A0A075B7F0,HUMAN HGNC=38476 UniProtKB=B9A064,HUMAN HGNC=5861 UniProtKB=A0M8Q6,HUMAN HGNC=5647 UniProtKB=A0A087WSY4,HUMAN HGNC=5563 UniProtKB=A0A075B7D0,HUMAN HGNC=5856 UniProtKB=P0DOY2,HUMAN HGNC=5606 UniProtKB=P01763,HUMAN HGNC=5576 UniProtKB=P01817,HUMAN HGNC=5528 UniProtKB=P01861,HUMAN HGNC=5541 UniProtKB=P01871,HUMAN HGNC=5585 UniProtKB=A0A0C4DH32,HUMAN HGNC=5551 UniProtKB=A0A0C4DH33,HUMAN HGNC=5526 UniProtKB=P01859,HUMAN HGNC=5657 UniProtKB=P0DP08,HUMAN Ensembl=ENSG00000282639 UniProtKB=A0A0J9YX35,HUMAN Gene=HV309_HUMAN UniProtKB=P01782,HUMAN HGNC=5654 UniProtKB=P01825,HUMAN HGNC=5553 UniProtKB=A0A0A0MS14,HUMAN Gene=HV108_HUMAN UniProtKB=P0DP01,HUMAN HGNC=5624 UniProtKB=A0A0B4J1X5,HUMAN HGNC=5620 UniProtKB=P01780,HUMAN HGNC=5598 UniProtKB=A0A0C4DH35,HUMAN HGNC=5580 UniProtKB=P01762,HUMAN HGNC=5633 UniProtKB=A0A075B7D8,HUMAN HGNC=5582 UniProtKB=A0A0B4J1V0,HUMAN HGNC=5478 UniProtKB=P01876,HUMAN HGNC=5617 UniProtKB=A0A075B6Q5,HUMAN HGNC=5594 UniProtKB=P0DP03,HUMAN HGNC=5655 UniProtKB= | sperm flagellum                                                                                   |
| GO:005125<br>1            |                                                                                                                                                                                                                                                                                                                                                                                                                                                                                                                                                                                                                                                                                                                                                                                                                                                                                                                                                                                                                                                                                                                                                                                                                                                                                                                               | positive regulation of<br>lymphocyte activation                                                   |

|            |                                                                                                                                                                                                                                                                                                                                                                                                                                                                                                                                                                                                                                                                                                                                                   |                                                                           |
|------------|---------------------------------------------------------------------------------------------------------------------------------------------------------------------------------------------------------------------------------------------------------------------------------------------------------------------------------------------------------------------------------------------------------------------------------------------------------------------------------------------------------------------------------------------------------------------------------------------------------------------------------------------------------------------------------------------------------------------------------------------------|---------------------------------------------------------------------------|
|            | =A0A0C4DH41,HUMAN HGNC=5636 UniProtKB=A0A075B7B8,HUMAN HGNC=5586 UniProtKB=A0A0B4J1V1,HUMAN HGNC=5581 UniProtKB=P01766,HUMAN HGNC=5622 UniProtKB=A0A0B4J1Y9,HUMAN HGNC=5652 UniProtKB=A0A075B6R2,HUMAN HGNC=5593 UniProtKB=P0DP02,HUMAN HGNC=5479 UniProtKB=P01877,HUMAN HGNC=5619 UniProtKB=A0A0C4DH42,HUMAN HGNC=5596 UniProtKB=P01772,HUMAN HGNC=5550 UniProtKB=P23083,HUMAN HGNC=5604 UniProtKB=A0A0B4J1X8,HUMAN HGNC=5525 UniProtKB=P01857,HUMAN HGNC=5662 UniProtKB=A0A0B4J1U7,HUMAN HGNC=5601 UniProtKB=A0A0C4DH36,HUMAN HGNC=5716 UniProtKB=P01834,HUMAN HGNC=5588 UniProtKB=P01764,HUMAN HGNC=5857 UniProtKB=P0DOY3,HUMAN HGNC=5610 UniProtKB=P01767,HUMAN Ensembl=ENSG00000282150 UniProtKB=A0A0J9YY99,HUMAN HGNC=5527 UniProtKB=P01860 |                                                                           |
| GO:0042383 | HUMAN HGNC=9069 UniProtKB=Q15149                                                                                                                                                                                                                                                                                                                                                                                                                                                                                                                                                                                                                                                                                                                  | sarcolemma                                                                |
| GO:0006487 | HUMAN HGNC=4242 UniProtKB=O94808,HUMAN HGNC=10382 UniProtKB=P04844                                                                                                                                                                                                                                                                                                                                                                                                                                                                                                                                                                                                                                                                                | protein N-linked glycosylation                                            |
| GO:0016573 | HUMAN HGNC=17305 UniProtKB=Q9Y6J9,HUMAN HGNC=10474 UniProtKB=Q9Y265,HUMAN HGNC=10475 UniProtKB=Q9Y230                                                                                                                                                                                                                                                                                                                                                                                                                                                                                                                                                                                                                                             | histone acetylation                                                       |
| GO:0031507 | HUMAN HGNC=4861 UniProtKB=Q9NRZ9                                                                                                                                                                                                                                                                                                                                                                                                                                                                                                                                                                                                                                                                                                                  | heterochromatin assembly                                                  |
| GO:0006338 | HUMAN HGNC=10474 UniProtKB=Q9Y265,HUMAN HGNC=7910 UniProtKB=P06748,HUMAN HGNC=10475 UniProtKB=Q9Y230,HUMAN HGNC=18039 UniProtKB=Q9UGL1                                                                                                                                                                                                                                                                                                                                                                                                                                                                                                                                                                                                            | chromatin remodeling                                                      |
| GO:0007044 | HUMAN HGNC=1090 UniProtKB=Q03001,HUMAN HGNC=3778 UniProtKB=P02751,HUMAN HGNC=9069 UniProtKB=Q15149                                                                                                                                                                                                                                                                                                                                                                                                                                                                                                                                                                                                                                                | cell-substrate junction assembly                                          |
| GO:0016763 | HUMAN HGNC=7413 UniProtKB=Q13126,HUMAN HGNC=626 UniProtKB=P07741,HUMAN HGNC=7892 UniProtKB=P00491,HUMAN HGNC=5157 UniProtKB=P00492                                                                                                                                                                                                                                                                                                                                                                                                                                                                                                                                                                                                                | transferase activity, transferring pentosyl groups                        |
| GO:0006793 | HUMAN HGNC=13420 UniProtKB=Q86TP1                                                                                                                                                                                                                                                                                                                                                                                                                                                                                                                                                                                                                                                                                                                 | phosphorus metabolic process                                              |
| GO:0045453 | HUMAN HGNC=29884 UniProtKB=Q8TF42,HUMAN HGNC=11283 UniProtKB=P12931                                                                                                                                                                                                                                                                                                                                                                                                                                                                                                                                                                                                                                                                               | bone resorption                                                           |
| GO:0050660 | HUMAN HGNC=13397 UniProtKB=Q9UHQ9,HUMAN HGNC=2898 UniProtKB=P09622,HUMAN HGNC=121 UniProtKB=O15254,HUMAN HGNC=119 UniProtKB=Q15067,HUMAN HGNC=2873 UniProtKB=P00387,HUMAN HGNC=4623 UniProtKB=P00390                                                                                                                                                                                                                                                                                                                                                                                                                                                                                                                                              | flavin adenine dinucleotide binding                                       |
| GO:0006979 | HUMAN HGNC=17169 UniProtKB=Q13162,HUMAN HGNC=5046 UniProtKB=P52272,HUMAN HGNC=1516 UniProtKB=P04040,HUMAN HGNC=4553 UniProtKB=P07203,HUMAN HGNC=612 UniProtKB=P05090                                                                                                                                                                                                                                                                                                                                                                                                                                                                                                                                                                              | response to oxidative stress                                              |
| GO:0007189 | HUMAN HGNC=4381 UniProtKB=Q14344,HUMAN HGNC=237 UniProtKB=O43306                                                                                                                                                                                                                                                                                                                                                                                                                                                                                                                                                                                                                                                                                  | adenylate cyclase-activating G protein-coupled receptor signaling pathway |
| GO:0048193 | HUMAN HGNC=31332 UniProtKB=Q6IQ22,HUMAN HGNC=7007 UniProtKB=P61006,HUMAN HGNC=11172 UniProtKB=Q13596                                                                                                                                                                                                                                                                                                                                                                                                                                                                                                                                                                                                                                              | Golgi vesicle transport                                                   |
| PC00226    | HUMAN HGNC=24335 UniProtKB=Q99627,HUMAN HGNC=28920 UniProtKB=Q5SW79,HUMAN HGNC=12851 UniProtKB=P62258,HUMAN HGNC=18271 UniProtKB=Q8N8S7,HUMAN HGNC=12849 UniProtKB=P31946,HUMAN HGNC=23416 UniProtKB=Q641Q2,HUMAN HGNC=25316 UniProtKB=Q5VZ19,HUMAN HGNC=19974 UniProtKB=Q8IUC4,HUMAN HGNC=2905 UniProtKB=O14490,HUMAN HGNC=11320 UniProtKB=Q8IZP0,HUMAN HGNC=15606 UniP                                                                                                                                                                                                                                                                                                                                                                          | scaffold/adaptor protein                                                  |

|            |                                                                                                                                                                                                                                                                                                                                                                                                                                                                                                                                                                                                                                                                                                                                                                                                                                                                                                                                                                                                                                                                                                                                                                                                                                                                         |                                                 |
|------------|-------------------------------------------------------------------------------------------------------------------------------------------------------------------------------------------------------------------------------------------------------------------------------------------------------------------------------------------------------------------------------------------------------------------------------------------------------------------------------------------------------------------------------------------------------------------------------------------------------------------------------------------------------------------------------------------------------------------------------------------------------------------------------------------------------------------------------------------------------------------------------------------------------------------------------------------------------------------------------------------------------------------------------------------------------------------------------------------------------------------------------------------------------------------------------------------------------------------------------------------------------------------------|-------------------------------------------------|
|            | rotKB=Q9UHA4,HUMAN HGNC=711 UniProtKB=P49407,HUMAN HGNC=12852 UniProtKB=P61981,HUMAN HGNC=7665 UniProtKB=O43639,HUMAN HGNC=13759 UniProtKB=Q7L576,HUMAN HGNC=28817 UniProtKB=Q96AG4,HUMAN HGNC=22934 UniProtKB=Q8NAB2,HUMAN HGNC=7237 UniProtKB=Q9Y6F6,HUMAN HGNC=11358 UniProtKB=O75886,HUMAN HGNC=15842 UniProtKB=Q96RT1,HUMAN HGNC=11357 UniProtKB=Q92783,HUMAN HGNC=29557 UniProtKB=Q0ZGT2,HUMAN HGNC=29890 UniProtKB=Q86UT6,HUMAN HGNC=15687 UniProtKB=O75563,HUMAN HGNC=30377 UniProtKB=Q14160,HUMAN HGNC=7219 UniProtKB=Q00013,HUMAN HGNC=12652 UniProtKB=P50552,HUMAN HGNC=21883 UniProtKB=Q9H3E2,HUMAN HGNC=26614 UniProtKB=Q8NB46,HUMAN HGNC=12853 UniProtKB=Q04917,HUMAN HGNC=10464 UniProtKB=Q15404,HUMAN HGNC=1226 UniProtKB=O14908,HUMAN HGNC=12854 UniProtKB=P27348,HUMAN HGNC=369 UniProtKB=Q9UKA4,HUMAN HGNC=2362 UniProtKB=P46108,HUMAN HGNC=16643 UniProtKB=Q14BN4,HUMAN HGNC=14977 UniProtKB=Q9Y5W7,HUMAN HGNC=18325 UniProtKB=Q2WGN9,HUMAN HGNC=22880 UniProtKB=Q96JG8,HUMAN HGNC=11172 UniProtKB=Q13596,HUMAN HGNC=4036 UniProtKB=O15117,HUMAN HGNC=6529 UniProtKB=Q13094,HUMAN HGNC=12855 UniProtKB=P63104,HUMAN HGNC=9847 UniProtKB=P43487,HUMAN HGNC=2363 UniProtKB=P46109,HUMAN HGNC=10840 UniProtKB=P29353,HUMAN HGNC=21295 UniProtKB=Q8TE68 |                                                 |
| GO:0005930 | HUMAN HGNC=30391 UniProtKB=Q9UG01,HUMAN HGNC=17060 UniProtKB=Q92845                                                                                                                                                                                                                                                                                                                                                                                                                                                                                                                                                                                                                                                                                                                                                                                                                                                                                                                                                                                                                                                                                                                                                                                                     | axoneme                                         |
| PC00105    | HUMAN HGNC=19155 UniProtKB=P57773                                                                                                                                                                                                                                                                                                                                                                                                                                                                                                                                                                                                                                                                                                                                                                                                                                                                                                                                                                                                                                                                                                                                                                                                                                       | gap junction                                    |
| GO:0120039 | HUMAN HGNC=12690 UniProtKB=P09327                                                                                                                                                                                                                                                                                                                                                                                                                                                                                                                                                                                                                                                                                                                                                                                                                                                                                                                                                                                                                                                                                                                                                                                                                                       | plasma membrane bounded                         |
| GO:0005126 | HUMAN HGNC=19100 UniProtKB=Q5VWK5,HUMAN HGNC=11766 UniProtKB=P01137                                                                                                                                                                                                                                                                                                                                                                                                                                                                                                                                                                                                                                                                                                                                                                                                                                                                                                                                                                                                                                                                                                                                                                                                     | cell projection                                 |
| GO:0009132 | HUMAN HGNC=362 UniProtKB=P54819,HUMAN HGNC=17376 UniProtKB=Q9UIJ7                                                                                                                                                                                                                                                                                                                                                                                                                                                                                                                                                                                                                                                                                                                                                                                                                                                                                                                                                                                                                                                                                                                                                                                                       | morphogenesis                                   |
| GO:0045296 | HUMAN HGNC=15902 UniProtKB=Q8IXH8,HUMAN HGNC=3244 UniProtKB=Q9NZN3,HUMAN HGNC=6207 UniProtKB=P14923,HUMAN HGNC=533 UniProtKB=P04083,HUMAN HGNC=14265 UniProtKB=Q86UP0,HUMAN HGNC=24634 UniProtKB=Q9UBC2,HUMAN HGNC=9069 UniProtKB=Q15149,HUMAN HGNC=3419 UniProtKB=P42566                                                                                                                                                                                                                                                                                                                                                                                                                                                                                                                                                                                                                                                                                                                                                                                                                                                                                                                                                                                               | cytokine receptor binding                       |
| GO:0009112 | HUMAN HGNC=12405 UniProtKB=P02766                                                                                                                                                                                                                                                                                                                                                                                                                                                                                                                                                                                                                                                                                                                                                                                                                                                                                                                                                                                                                                                                                                                                                                                                                                       | nucleoside diphosphate metabolic process        |
| GO:0001664 | HUMAN HGNC=4395 UniProtKB=P19086,HUMAN HGNC=711 UniProtKB=P49407,HUMAN HGNC=4384 UniProtKB=P63096,HUMAN HGNC=4381 UniProtKB=Q14344,HUMAN HGNC=4387 UniProtKB=P08754,HUMAN HGNC=4385 UniProtKB=P04899,HUMAN HGNC=4393 UniProtKB=P11488,HUMAN HGNC=4390 UniProtKB=P50148                                                                                                                                                                                                                                                                                                                                                                                                                                                                                                                                                                                                                                                                                                                                                                                                                                                                                                                                                                                                  | cadherin binding                                |
| GO:0030968 | HUMAN HGNC=463 UniProtKB=Q9UKV5,HUMAN HGNC=1455 UniProtKB=P27797,HUMAN HGNC=5238 UniProtKB=P11021,HUMAN HGNC=25035 UniProtKB=Q5VVQ6,HUMAN HGNC=1473 UniProtKB=P27824,HUMAN HGNC=17943 UniProtKB=Q9GZP9                                                                                                                                                                                                                                                                                                                                                                                                                                                                                                                                                                                                                                                                                                                                                                                                                                                                                                                                                                                                                                                                  | nucleobase metabolic process                    |
| GO:0030099 | HUMAN HGNC=13937 UniProtKB=O95866                                                                                                                                                                                                                                                                                                                                                                                                                                                                                                                                                                                                                                                                                                                                                                                                                                                                                                                                                                                                                                                                                                                                                                                                                                       | G protein-coupled receptor binding              |
|            |                                                                                                                                                                                                                                                                                                                                                                                                                                                                                                                                                                                                                                                                                                                                                                                                                                                                                                                                                                                                                                                                                                                                                                                                                                                                         | endoplasmic reticulum unfolded protein response |
|            |                                                                                                                                                                                                                                                                                                                                                                                                                                                                                                                                                                                                                                                                                                                                                                                                                                                                                                                                                                                                                                                                                                                                                                                                                                                                         | myeloid cell differentiation                    |

|            |                                                                                                                                                                                                                                                                                                                                                                                                                                                                                                                                                                                                                                                            |                                                           |
|------------|------------------------------------------------------------------------------------------------------------------------------------------------------------------------------------------------------------------------------------------------------------------------------------------------------------------------------------------------------------------------------------------------------------------------------------------------------------------------------------------------------------------------------------------------------------------------------------------------------------------------------------------------------------|-----------------------------------------------------------|
| GO:0004857 | HUMAN HGNC=607 UniProtKB=P02654,HUMAN HGNC=7618 UniProtKB=O14974,HUMAN HGNC=871 UniProtKB=Q9UII2,HUMAN HGNC=533 UniProtKB=P04083                                                                                                                                                                                                                                                                                                                                                                                                                                                                                                                           | enzyme inhibitor activity                                 |
| GO:0006047 | HUMAN HGNC=4242 UniProtKB=O94808                                                                                                                                                                                                                                                                                                                                                                                                                                                                                                                                                                                                                           | UDP-N-acetylglucosamine metabolic process                 |
| GO:0000289 | HUMAN HGNC=29190 UniProtKB=Q9UPQ9                                                                                                                                                                                                                                                                                                                                                                                                                                                                                                                                                                                                                          | nuclear-transcribed mRNA poly(A) tail shortening          |
| GO:0045332 | HUMAN HGNC=13531 UniProtKB=Q9Y2Q0                                                                                                                                                                                                                                                                                                                                                                                                                                                                                                                                                                                                                          | phospholipid translocation                                |
| GO:0030017 | HUMAN HGNC=11873 UniProtKB=Q9NYL9                                                                                                                                                                                                                                                                                                                                                                                                                                                                                                                                                                                                                          | sarcomere                                                 |
| GO:0006417 | HUMAN HGNC=27424 UniProtKB=Q5T481,HUMAN HGNC=13759 UniProtKB=Q7L576,HUMAN HGNC=9583 UniProtKB=P26599,HUMAN HGNC=17894 UniProtKB=Q14966                                                                                                                                                                                                                                                                                                                                                                                                                                                                                                                     | regulation of translation                                 |
| GO:0005548 | HUMAN HGNC=1869 UniProtKB=P11597                                                                                                                                                                                                                                                                                                                                                                                                                                                                                                                                                                                                                           | phospholipid transporter activity                         |
| GO:0006123 | HUMAN HGNC=2265 UniProtKB=P13073,HUMAN HGNC=2267 UniProtKB=P20674,HUMAN HGNC=19986 UniProtKB=P99999,HUMAN HGNC=2292 UniProtKB=P15954                                                                                                                                                                                                                                                                                                                                                                                                                                                                                                                       | mitochondrial electron transport, cytochrome c to oxygen  |
| GO:0010648 | HUMAN HGNC=9855 UniProtKB=P62834,HUMAN HGNC=9857 UniProtKB=P61224                                                                                                                                                                                                                                                                                                                                                                                                                                                                                                                                                                                          | negative regulation of cell communication                 |
| GO:0006641 | HUMAN HGNC=607 UniProtKB=P02654,HUMAN HGNC=1869 UniProtKB=P11597,HUMAN HGNC=603 UniProtKB=P04114                                                                                                                                                                                                                                                                                                                                                                                                                                                                                                                                                           | triglyceride metabolic process                            |
| GO:0044237 | HUMAN HGNC=11179 UniProtKB=P00441,HUMAN HGNC=8527 UniProtKB=P55809                                                                                                                                                                                                                                                                                                                                                                                                                                                                                                                                                                                         | cellular metabolic process                                |
| GO:0006635 | HUMAN HGNC=4801 UniProtKB=P40939,HUMAN HGNC=121 UniProtKB=O15254,HUMAN HGNC=94 UniProtKB=Q9BWD1,HUMAN HGNC=119 UniProtKB=Q15067,HUMAN HGNC=3151 UniProtKB=P30084,HUMAN HGNC=82 UniProtKB=P09110                                                                                                                                                                                                                                                                                                                                                                                                                                                            | fatty acid beta-oxidation                                 |
| GO:0045944 | HUMAN HGNC=25473 UniProtKB=Q9P2N6,HUMAN HGNC=7670 UniProtKB=Q9Y6Q9,HUMAN HGNC=7133 UniProtKB=O14686,HUMAN HGNC=13726 UniProtKB=Q8NEZ4,HUMAN HGNC=30025 UniProtKB=Q5VV67,HUMAN HGNC=9866 UniProtKB=P13631,HUMAN HGNC=6767 UniProtKB=Q15797,HUMAN HGNC=23688 UniProtKB=Q86UU0,HUMAN HGNC=17305 UniProtKB=Q9Y6J9,HUMAN HGNC=6207 UniProtKB=P14923,HUMAN HGNC=7967 UniProtKB=Q96RI1,HUMAN HGNC=8647 UniProtKB=Q15365,HUMAN HGNC=14451 UniProtKB=Q9BQK8,HUMAN HGNC=5048 UniProtKB=Q00839,HUMAN HGNC=7547 UniProtKB=P10243,HUMAN HGNC=16272 UniProtKB=Q96JK9,HUMAN HGNC=10055 UniProtKB=Q8N5U6,HUMAN HGNC=7910 UniProtKB=P06748,HUMAN HGNC=7002 UniProtKB=A6NDR6 | positive regulation of transcription by RNA polymerase II |
| PC00207    | HUMAN HGNC=3778 UniProtKB=P02751,HUMAN HGNC=3662 UniProtKB=P02675,HUMAN HGNC=8078 UniProtKB=O95158,HUMAN HGNC=11891 UniProtKB=P05452,HUMAN HGNC=3625 UniProtKB=O75636,HUMAN HGNC=11756 UniProtKB=Q03403,HUMAN HGNC=4374 UniProtKB=O60234,HUMAN HGNC=3624 UniProtKB=Q15485,HUMAN HGNC=3694 UniProtKB=P02679                                                                                                                                                                                                                                                                                                                                                 | intercellular signal molecule                             |
| GO:0030833 | HUMAN HGNC=3338 UniProtKB=Q14247,HUMAN HGNC=2695 UniProtKB=Q16643,HUMAN HGNC=8881 UniProtKB=P07737,HUMAN HGNC=2696 UniProtKB=Q9UJU6,HUMAN HGNC=4844 UniProtKB=P14317,HUMAN HGNC=18304 UniProtKB=Q14019,HUMAN HGNC=21035 UniProtKB=Q8N392                                                                                                                                                                                                                                                                                                                                                                                                                   | regulation of actin filament polymerization               |

|            |                                                                                                                                                                                                                                                                                                                                                                                                                                                                                                                                                                                                                                                                                                                                                                                                                                      |                                                  |
|------------|--------------------------------------------------------------------------------------------------------------------------------------------------------------------------------------------------------------------------------------------------------------------------------------------------------------------------------------------------------------------------------------------------------------------------------------------------------------------------------------------------------------------------------------------------------------------------------------------------------------------------------------------------------------------------------------------------------------------------------------------------------------------------------------------------------------------------------------|--------------------------------------------------|
| GO:0009117 | HUMAN HGNC=16369 UniProtKB=Q99497<br>HUMAN HGNC=8504 UniProtKB=Q969R2,HUMAN HGNC=5253 UniProtKB=P07900,HUMAN HGNC=5258 UniProtKB=P08238,HUMAN HGNC=8783 UniProtKB=Q08499,HUMAN HGNC=3244 UniProtKB=Q9NZN3,HUMAN HGNC=10496 UniProtKB=P06703,HUMAN HGNC=9069 UniProtKB=Q15149                                                                                                                                                                                                                                                                                                                                                                                                                                                                                                                                                         | nucleotide metabolic process                     |
| GO:0048471 | HUMAN HGNC=18423 UniProtKB=O75140,HUMAN HGNC=25694 UniProtKB=Q8TC07,HUMAN HGNC=6111 UniProtKB=Q13576,HUMAN HGNC=12363 UniProtKB=P49815,HUMAN HGNC=14261 UniProtKB=Q9NS28,HUMAN HGNC=20331 UniProtKB=Q14644,HUMAN HGNC=16925 UniProtKB=Q96P48,HUMAN HGNC=17073 UniProtKB=Q9UNA1,HUMAN HGNC=25571 UniProtKB=Q9NVG8,HUMAN HGNC=673 UniProtKB=Q07960,HUMAN HGNC=21035 UniProtKB=Q8N392                                                                                                                                                                                                                                                                                                                                                                                                                                                   | perinuclear region of cytoplasm                  |
| PC00257    | HUMAN HGNC=26486 UniProtKB=Q6PJW8,HUMAN HGNC=2949 UniProtKB=Q8TD57,HUMAN HGNC=18587 UniProtKB=O94901,HUMAN HGNC=12652 UniProtKB=P50552,HUMAN HGNC=18271 UniProtKB=Q8N8S7,HUMAN HGNC=6561 UniProtKB=P09382,HUMAN HGNC=4398 UniProtKB=P62879,HUMAN HGNC=4823 UniProtKB=P69905,HUMAN HGNC=4829 UniProtKB=P02042,HUMAN HGNC=10496 UniProtKB=P06703,HUMAN HGNC=20731 UniProtKB=Q9HAV0,HUMAN HGNC=12648 UniProtKB=Q9P0L0,HUMAN HGNC=11320 UniProtKB=Q8IZP0,HUMAN HGNC=15476 UniProtKB=P63167,HUMAN HGNC=4827 UniProtKB=P68871,HUMAN HGNC=2951 UniProtKB=Q9C0G6,HUMAN HGNC=4831 UniProtKB=P69891,HUMAN HGNC=2952 UniProtKB=Q96JB1,HUMAN HGNC=16391 UniProtKB=Q9H257,HUMAN HGNC=10899 UniProtKB=P63208,HUMAN HGNC=12649 UniProtKB=O95292,HUMAN HGNC=14452 UniProtKB=Q9NYG5,HUMAN HGNC=4396 UniProtKB=P62873,HUMAN HGNC=6091 UniProtKB=P06213 | GTPase-activating protein                        |
| GO:0005515 | HUMAN HGNC=20508 UniProtKB=Q8IUE6,HUMAN HGNC=4716 UniProtKB=P16403,HUMAN HGNC=4718 UniProtKB=P10412,HUMAN HGNC=4719 UniProtKB=P16401                                                                                                                                                                                                                                                                                                                                                                                                                                                                                                                                                                                                                                                                                                 | protein binding                                  |
| GO:0006342 | HUMAN HGNC=2265 UniProtKB=P13073,HUMAN HGNC=6834 UniProtKB=P27338,HUMAN HGNC=9756 UniProtKB=O00391,HUMAN HGNC=2288 UniProtKB=P14406,HUMAN HGNC=2267 UniProtKB=P20674,HUMAN HGNC=2295 UniProtKB=P00450,HUMAN HGNC=2292 UniProtKB=P15954                                                                                                                                                                                                                                                                                                                                                                                                                                                                                                                                                                                               | chromatin silencing                              |
| PC00175    |                                                                                                                                                                                                                                                                                                                                                                                                                                                                                                                                                                                                                                                                                                                                                                                                                                      | oxidase                                          |
| GO:0042177 | HUMAN HGNC=11820 UniProtKB=P01033                                                                                                                                                                                                                                                                                                                                                                                                                                                                                                                                                                                                                                                                                                                                                                                                    | negative regulation of protein catabolic process |
| GO:0001786 | HUMAN HGNC=11510 UniProtKB=Q8N9I0,HUMAN HGNC=544 UniProtKB=P08133,HUMAN HGNC=11512 UniProtKB=Q9H2B2                                                                                                                                                                                                                                                                                                                                                                                                                                                                                                                                                                                                                                                                                                                                  | phosphatidylserine binding                       |
| GO:0036002 | HUMAN HGNC=5048 UniProtKB=Q00839                                                                                                                                                                                                                                                                                                                                                                                                                                                                                                                                                                                                                                                                                                                                                                                                     | pre-mRNA binding                                 |
| GO:0000808 | HUMAN HGNC=26200 UniProtKB=Q9H668                                                                                                                                                                                                                                                                                                                                                                                                                                                                                                                                                                                                                                                                                                                                                                                                    | origin recognition complex                       |
| GO:0010817 | HUMAN HGNC=253 UniProtKB=P11766,HUMAN HGNC=251 UniProtKB=P00326,HUMAN HGNC=8569 UniProtKB=P29122,HUMAN HGNC=255 UniProtKB=P28332                                                                                                                                                                                                                                                                                                                                                                                                                                                                                                                                                                                                                                                                                                     | regulation of hormone levels                     |
| GO:0007134 | HUMAN HGNC=7326 UniProtKB=P20585,HUMAN HGNC=20473 UniProtKB=Q9BX63,HUMAN HGNC=23845 UniProtKB=Q8IY92                                                                                                                                                                                                                                                                                                                                                                                                                                                                                                                                                                                                                                                                                                                                 | meiotic telophase I                              |

|            |                                                                                                                                                                                                                                                                                                                                                                                                                                                                                                                                                                                                                                                                                                                                                                                                                                            |                                                                       |
|------------|--------------------------------------------------------------------------------------------------------------------------------------------------------------------------------------------------------------------------------------------------------------------------------------------------------------------------------------------------------------------------------------------------------------------------------------------------------------------------------------------------------------------------------------------------------------------------------------------------------------------------------------------------------------------------------------------------------------------------------------------------------------------------------------------------------------------------------------------|-----------------------------------------------------------------------|
| GO:0000978 | HUMAN HGNC=33108 UniProtKB=Q6NX45,HUMAN HGNC=14008 UniProtKB=Q9BW11,HUMAN HGNC=13061 UniProtKB=Q14587,HUMAN HGNC=18411 UniProtKB=Q3KNW1,HUMAN HGNC=14010 UniProtKB=Q8IWI9,HUMAN HGNC=23708 UniProtKB=Q6ZR52,HUMAN HGNC=11364 UniProtKB=P40763,HUMAN HGNC=6702 UniProtKB=Q32MZ4,HUMAN HGNC=29084 UniProtKB=O75123,HUMAN HGNC=26427 UniProtKB=Q96ND8,HUMAN HGNC=17801 UniProtKB=Q8NHY6,HUMAN HGNC=11594 UniProtKB=Q96SF7,HUMAN HGNC=9459 UniProtKB=Q92786,HUMAN HGNC=9866 UniProtKB=P13631,HUMAN HGNC=6767 UniProtKB=Q15797,HUMAN HGNC=13109 UniProtKB=P17038,HUMAN HGNC=29989 UniProtKB=Q86YP4,HUMAN HGNC=51815 UniProtKB=A0A1W2PPM1,HUMAN HGNC=3815 UniProtKB=Q12951,HUMAN HGNC=7967 UniProtKB=Q96RI1,HUMAN HGNC=11590 UniProtKB=Q16650,HUMAN HGNC=5048 UniProtKB=Q00839,HUMAN HGNC=7547 UniProtKB=P10243,HUMAN HGNC=7002 UniProtKB=A6NDR6 | RNA polymerase II cis-regulatory region sequence-specific DNA binding |
| GO:0003723 | HUMAN HGNC=3189 UniProtKB=P68104,HUMAN HGNC=30646 UniProtKB=Q7KZF4,HUMAN HGNC=18018 UniProtKB=Q8IX18,HUMAN HGNC=5043 UniProtKB=P31942,HUMAN HGNC=39025 UniProtKB=Q9QC07,HUMAN HGNC=4622 UniProtKB=Q8IYD1,HUMAN HGNC=4621 UniProtKB=P15170,HUMAN HGNC=3200 UniProtKB=Q5VTE0,HUMAN HGNC=10353 UniProtKB=P36578,HUMAN HGNC=17196 UniProtKB=Q8NG08,HUMAN HGNC=20471 UniProtKB=O95777,HUMAN HGNC=3300 UniProtKB=P63241,HUMAN HGNC=2678 UniProtKB=P14868,HUMAN HGNC=3214 UniProtKB=P13639,HUMAN HGNC=17821 UniProtKB=O00148,HUMAN HGNC=10363 UniProtKB=P18124,HUMAN HGNC=15861 UniProtKB=Q9H5Z1,HUMAN HGNC=30796 UniProtKB=Q9Y3F4,HUMAN HGNC=5036 UniProtKB=Q14103,HUMAN HGNC=12420 UniProtKB=P49411,HUMAN HGNC=7910 UniProtKB=P06748,HUMAN HGNC=10396 UniProtKB=P62249,HUMAN HGNC=10305 UniProtKB=P50914                                        | RNA binding                                                           |
| GO:0008373 | HUMAN HGNC=10869 UniProtKB=Q92185                                                                                                                                                                                                                                                                                                                                                                                                                                                                                                                                                                                                                                                                                                                                                                                                          | sialyltransferase activity                                            |
| GO:0061135 | HUMAN HGNC=9568 UniProtKB=Q06323                                                                                                                                                                                                                                                                                                                                                                                                                                                                                                                                                                                                                                                                                                                                                                                                           | endopeptidase regulator activity                                      |
| GO:0030234 | HUMAN HGNC=4312 UniProtKB=P48507                                                                                                                                                                                                                                                                                                                                                                                                                                                                                                                                                                                                                                                                                                                                                                                                           | enzyme regulator activity                                             |
| GO:0006935 | HUMAN HGNC=10046 UniProtKB=P12724,HUMAN HGNC=10045 UniProtKB=P10153                                                                                                                                                                                                                                                                                                                                                                                                                                                                                                                                                                                                                                                                                                                                                                        | chemotaxis                                                            |
| GO:0007018 | HUMAN HGNC=2951 UniProtKB=Q9C0G6,HUMAN HGNC=6317 UniProtKB=O43896,HUMAN HGNC=17060 UniProtKB=Q92845                                                                                                                                                                                                                                                                                                                                                                                                                                                                                                                                                                                                                                                                                                                                        | microtubule-based movement                                            |
| GO:0005198 | HUMAN HGNC=12407 UniProtKB=P68366,HUMAN HGNC=1117 UniProtKB=Q9UPA5,HUMAN HGNC=705 UniProtKB=O15144,HUMAN HGNC=12410 UniProtKB=Q9NY65,HUMAN HGNC=20778 UniProtKB=P07437,HUMAN HGNC=16257 UniProtKB=Q9H4B7,HUMAN HGNC=9069 UniProtKB=Q15149,HUMAN HGNC=9086 UniProtKB=P60201,HUMAN HGNC=20766 UniProtKB=Q71U36,HUMAN HGNC=20774 UniProtKB=P04350,HUMAN HGNC=13406 UniProtKB=Q9Y6V0,HUMAN HGNC=20771 UniProtKB=P68371                                                                                                                                                                                                                                                                                                                                                                                                                         | structural molecule activity                                          |
| GO:0010498 | HUMAN HGNC=20635 UniProtKB=Q14997,HUMAN HGNC=9568 UniProtKB=Q06323                                                                                                                                                                                                                                                                                                                                                                                                                                                                                                                                                                                                                                                                                                                                                                         | proteasomal protein catabolic process                                 |
| GO:0006099 | HUMAN HGNC=118 UniProtKB=Q99798,HUMAN HGNC=2422 UniProtKB=O75390,HUMAN HGNC=117 UniProtKB=P21399,HUMAN                                                                                                                                                                                                                                                                                                                                                                                                                                                                                                                                                                                                                                                                                                                                     | tricarboxylic acid cycle                                              |

|           |                                                                |                               |
|-----------|----------------------------------------------------------------|-------------------------------|
|           | HGNC=6970  UniProtKB=P40925,HUMAN  HGNC=5386  UniProtKB=P51553 |                               |
| GO:003059 |                                                                | neurotransmitter receptor     |
| 4         | HUMAN  HGNC=16768  UniProtKB=O60391                            | activity                      |
| GO:001406 |                                                                | regulation of                 |
| 6         | HUMAN  HGNC=6091  UniProtKB=P06213                             | phosphatidylinositol 3-       |
|           | HUMAN  HGNC=15720  UniProtKB=Q13033,HUMAN  HGNC=1459           | kinase signaling              |
|           | UniProtKB=Q14012,HUMAN  HGNC=11424  UniProtKB=O43815,HU        |                               |
| GO:000551 | MAN  HGNC=6111  UniProtKB=Q13576,HUMAN  HGNC=9314  UniP        |                               |
| 6         | rotKB=Q08209                                                   | calmodulin binding            |
| GO:000452 |                                                                | endodeoxyribonuclease         |
| 0         | HUMAN  HGNC=23845  UniProtKB=Q8IY92                            | activity                      |
| GO:005507 |                                                                |                               |
| 4         | HUMAN  HGNC=15999  UniProtKB=Q9NZV5                            | calcium ion homeostasis       |
| GO:000823 | HUMAN  HGNC=24437  UniProtKB=Q96KP4,HUMAN  HGNC=20635          |                               |
| 3         | UniProtKB=Q14997,HUMAN  HGNC=20675  UniProtKB=Q96KN2           | peptidase activity            |
|           | HUMAN  HGNC=3282  UniProtKB=P60842,HUMAN  HGNC=3265  U         |                               |
| GO:000374 | niProtKB=P05198,HUMAN  Gene=EIF2S3L  UniProtKB=Q2VIR3,HU       | translation initiation factor |
| 3         | MAN  HGNC=3297  UniProtKB=P78344                               | activity                      |
|           | HUMAN  HGNC=1406  UniProtKB=Q9Y698,HUMAN  HGNC=3757  U         |                               |
| GO:003162 | niProtKB=O75955,HUMAN  HGNC=711  UniProtKB=P49407,HUMA         |                               |
| 3         | N  HGNC=2974  UniProtKB=P50570,HUMAN  HGNC=29125  UniProt      | receptor internalization      |
| GO:004616 | KB=Q9UQ16                                                      |                               |
| 5         | HUMAN  HGNC=29035  UniProtKB=O43314,HUMAN  HGNC=16369          | alcohol biosynthetic process  |
|           | UniProtKB=Q99497,HUMAN  HGNC=2689  UniProtKB=P09172            |                               |
|           | HUMAN  HGNC=9240  UniProtKB=P02775,HUMAN  HGNC=2761  U         |                               |
| GO:007122 | niProtKB=P59665,HUMAN  HGNC=8862  UniProtKB=P10720,HUMA        |                               |
| 2         | N  HGNC=8861  UniProtKB=P02776,HUMAN  HGNC=1628  UniProtK      | cellular response to          |
|           | B=P08571,HUMAN  HGNC=6517  UniProtKB=P18428                    | lipopolysaccharide            |
| GO:004848 | HUMAN  HGNC=2974  UniProtKB=P50570,HUMAN  HGNC=11510           |                               |
| 8         | UniProtKB=Q8N9I0,HUMAN  HGNC=29125  UniProtKB=Q9UQ16,H         |                               |
| GO:000631 | UMAN  HGNC=11138  UniProtKB=P37840                             | synaptic vesicle endocytosis  |
| 2         |                                                                |                               |
|           | HUMAN  HGNC=7326  UniProtKB=P20585                             | mitotic recombination         |
|           | HUMAN  HGNC=7106  UniProtKB=P54252,HUMAN  HGNC=23077           |                               |
|           | UniProtKB=Q96FW1,HUMAN  HGNC=25648  UniProtKB=Q8N5J2,H         |                               |
|           | UMAN  HGNC=20063  UniProtKB=Q86T82,HUMAN  HGNC=12628           |                               |
|           | UniProtKB=P45974,HUMAN  HGNC=25035  UniProtKB=Q5VVQ6,HU        |                               |
| GO:000484 | MAN  HGNC=13485  UniProtKB=Q9BXU7,HUMAN  HGNC=20076  U         | thiol-dependent ubiquitin-    |
| 3         | niProtKB=Q96K76                                                | specific protease activity    |
| GO:001406 |                                                                | phosphatidylinositol 3-       |
| 5         | HUMAN  HGNC=6091  UniProtKB=P06213                             | kinase signaling              |
|           | HUMAN  HGNC=28422  UniProtKB=Q8NCE0,HUMAN  HGNC=4395           |                               |
|           | UniProtKB=P19086,HUMAN  HGNC=4384  UniProtKB=P63096,HUM        |                               |
|           | AN  HGNC=4398  UniProtKB=P62879,HUMAN  HGNC=4387  UniProt      |                               |
|           | KB=P08754,HUMAN  HGNC=20731  UniProtKB=Q9HAV0,HUMAN  H         |                               |
|           | GNC=4385  UniProtKB=P04899,HUMAN  HGNC=4390  UniProtKB=P       |                               |
|           | 50148,HUMAN  HGNC=3350  UniProtKB=P06733,HUMAN  HGNC=3         |                               |
|           | 353  UniProtKB=P09104,HUMAN  HGNC=4312  UniProtKB=P48507,      |                               |
|           | HUMAN  HGNC=4381  UniProtKB=Q14344,HUMAN  HGNC=3354  U         |                               |
| GO:190249 | niProtKB=P13929,HUMAN  HGNC=4393  UniProtKB=P11488,HUMA        |                               |
| 4         | N  HGNC=4396  UniProtKB=P62873                                 | catalytic complex             |

|            |                                                                                                                                                                                                                                                                                                                                                                                                                                                                                                                          |                                                          |
|------------|--------------------------------------------------------------------------------------------------------------------------------------------------------------------------------------------------------------------------------------------------------------------------------------------------------------------------------------------------------------------------------------------------------------------------------------------------------------------------------------------------------------------------|----------------------------------------------------------|
| GO:0043588 | HUMAN HGNC=1504 UniProtKB=P42574,HUMAN HGNC=533 UniProtKB=P04083                                                                                                                                                                                                                                                                                                                                                                                                                                                         | skin development                                         |
| GO:0009966 | HUMAN HGNC=1692 UniProtKB=P08962,HUMAN HGNC=2444 UniProtKB=P41240                                                                                                                                                                                                                                                                                                                                                                                                                                                        | regulation of signal transduction                        |
| GO:0055072 | HUMAN HGNC=2295 UniProtKB=P00450                                                                                                                                                                                                                                                                                                                                                                                                                                                                                         | iron ion homeostasis                                     |
| GO:0038023 | HUMAN HGNC=8601 UniProtKB=Q06141,HUMAN HGNC=4243 UniProtKB=P56159,HUMAN HGNC=30013 UniProtKB=Q96PD5,HUMAN HGNC=7228 UniProtKB=P22897,HUMAN HGNC=4244 UniProtKB=O00451                                                                                                                                                                                                                                                                                                                                                    | signaling receptor activity                              |
| GO:0006796 | HUMAN HGNC=29035 UniProtKB=O43314,HUMAN HGNC=28883 UniProtKB=Q9H2U2,HUMAN HGNC=4242 UniProtKB=O94808,HUMAN HGNC=4456 UniProtKB=P43304                                                                                                                                                                                                                                                                                                                                                                                    | phosphate-containing compound metabolic process          |
| GO:0019216 | HUMAN HGNC=607 UniProtKB=P02654                                                                                                                                                                                                                                                                                                                                                                                                                                                                                          | regulation of lipid metabolic process                    |
| PC00151    | HUMAN HGNC=12648 UniProtKB=Q9P0L0,HUMAN HGNC=10458 UniProtKB=Q92681,HUMAN HGNC=1663 UniProtKB=P16671,HUMAN HGNC=6499 UniProtKB=P11279,HUMAN HGNC=20726 UniProtKB=Q8WVM8,HUMAN HGNC=11446 UniProtKB=O00186,HUMAN HGNC=6501 UniProtKB=P13473,HUMAN HGNC=11445 UniProtKB=Q15833,HUMAN HGNC=11510 UniProtKB=Q8N9I0,HUMAN HGNC=12649 UniProtKB=O95292,HUMAN HGNC=11138 UniProtKB=P37840,HUMAN HGNC=11512 UniProtKB=Q9H2B2,HUMAN HGNC=8515 UniProtKB=Q9HC10                                                                    | membrane trafficking                                     |
| GO:0033617 | HUMAN HGNC=26801 UniProtKB=Q8N8Q8                                                                                                                                                                                                                                                                                                                                                                                                                                                                                        | regulatory protein                                       |
| GO:0048519 | HUMAN HGNC=2367 UniProtKB=P02741,HUMAN HGNC=8087 UniProtKB=P29728,HUMAN HGNC=584 UniProtKB=P02743                                                                                                                                                                                                                                                                                                                                                                                                                        | mitochondrial cytochrome c oxidase assembly              |
| GO:1902905 | HUMAN HGNC=12754 UniProtKB=O75083,HUMAN HGNC=8881 UniProtKB=P07737                                                                                                                                                                                                                                                                                                                                                                                                                                                       | negative regulation of biological process                |
| GO:0099565 | HUMAN HGNC=15474 UniProtKB=Q9Y566,HUMAN HGNC=2905 UniProtKB=O14490,HUMAN HGNC=14294 UniProtKB=Q9BYB0                                                                                                                                                                                                                                                                                                                                                                                                                     | positive regulation of supramolecular fiber organization |
| GO:0070371 | HUMAN HGNC=1681 UniProtKB=P16070,HUMAN HGNC=10632 UniProtKB=P13501                                                                                                                                                                                                                                                                                                                                                                                                                                                       | chemical synaptic transmission, postsynaptic             |
| GO:0070507 | HUMAN HGNC=9847 UniProtKB=P43487                                                                                                                                                                                                                                                                                                                                                                                                                                                                                         | ERK1 and ERK2 cascade                                    |
| GO:0047372 | HUMAN HGNC=13921 UniProtKB=O95870                                                                                                                                                                                                                                                                                                                                                                                                                                                                                        | regulation of microtubule cytoskeleton organization      |
| GO:0006810 | HUMAN HGNC=14685 UniProtKB=Q9Y624,HUMAN HGNC=4187 UniProtKB=P02774,HUMAN HGNC=316 UniProtKB=P43652,HUMAN HGNC=317 UniProtKB=P02771,HUMAN HGNC=399 UniProtKB=P02768                                                                                                                                                                                                                                                                                                                                                       | acylglycerol lipase activity                             |
| PC00113    | HUMAN HGNC=21740 UniProtKB=Q6ZV73,HUMAN HGNC=16854 UniProtKB=Q9Y4G8,HUMAN HGNC=9879 UniProtKB=Q7LDG7,HUMAN HGNC=21213 UniProtKB=Q5TH69,HUMAN HGNC=2988 UniProtKB=Q92608,HUMAN HGNC=30282 UniProtKB=Q3MIN7,HUMAN HGNC=15607 UniProtKB=Q14155,HUMAN HGNC=9504 UniProtKB=O43739,HUMAN HGNC=9878 UniProtKB=O95267,HUMAN HGNC=29374 UniProtKB=Q76NI1,HUMAN HGNC=23479 UniProtKB=Q96BY6,HUMAN HGNC=21726 UniProtKB=Q96PE2,HUMAN HGNC=4814 UniProtKB=O60229,HUMAN HGNC=25516 UniProtKB=Q8TER5,HUMAN HGNC=14545 UniProtKB=Q8IV61 | transport                                                |
|            |                                                                                                                                                                                                                                                                                                                                                                                                                                                                                                                          | guanyl-nucleotide exchange factor                        |

|            |                                                                                                                                                                                                                                                                                                                                                                                                                                                                                                                                                                                                                                                                                                                                                                                                                                                                                                                                                                                                                                                                                                                                                                                                                                                                                                                                                                                                     |                                        |
|------------|-----------------------------------------------------------------------------------------------------------------------------------------------------------------------------------------------------------------------------------------------------------------------------------------------------------------------------------------------------------------------------------------------------------------------------------------------------------------------------------------------------------------------------------------------------------------------------------------------------------------------------------------------------------------------------------------------------------------------------------------------------------------------------------------------------------------------------------------------------------------------------------------------------------------------------------------------------------------------------------------------------------------------------------------------------------------------------------------------------------------------------------------------------------------------------------------------------------------------------------------------------------------------------------------------------------------------------------------------------------------------------------------------------|----------------------------------------|
| PC00119    | HUMAN HGNC=9459 UniProtKB=Q92786,HUMAN HGNC=51815 UniProtKB=A0A1W2PPM1,HUMAN HGNC=19347 UniProtKB=O14529,HUMAN HGNC=15935 UniProtKB=Q9H4I2,HUMAN HGNC=7002 UniProtKB=A6NDR6                                                                                                                                                                                                                                                                                                                                                                                                                                                                                                                                                                                                                                                                                                                                                                                                                                                                                                                                                                                                                                                                                                                                                                                                                         | homeodomain transcription factor       |
| GO:0031012 | HUMAN HGNC=4439 UniProtKB=P07359,HUMAN HGNC=5468 UniProtKB=P35858,HUMAN HGNC=3011 UniProtKB=Q07507,HUMAN HGNC=7516 UniProtKB=Q9HC84,HUMAN HGNC=13572 UniProtKB=Q9Y6R7,HUMAN HGNC=2761 UniProtKB=P59665,HUMAN HGNC=7515 UniProtKB=P98088,HUMAN HGNC=11771 UniProtKB=Q15582,HUMAN HGNC=5164 UniProtKB=Q9Y251,HUMAN HGNC=11820 UniProtKB=P01033,HUMAN HGNC=7060 UniProtKB=P08493,HUMAN HGNC=12726 UniProtKB=P04275,HUMAN HGNC=2313 UniProtKB=P22792                                                                                                                                                                                                                                                                                                                                                                                                                                                                                                                                                                                                                                                                                                                                                                                                                                                                                                                                                    | extracellular matrix                   |
| GO:0017157 | HUMAN HGNC=31332 UniProtKB=Q6IQ22,HUMAN HGNC=7007 UniProtKB=P61006,HUMAN HGNC=9855 UniProtKB=P62834,HUMAN HGNC=7641 UniProtKB=P54920,HUMAN HGNC=9164 UniProtKB=Q99719,HUMAN HGNC=9778 UniProtKB=P20337,HUMAN HGNC=11510 UniProtKB=Q8N9IO,HUMAN HGNC=533 UniProtKB=P04083,HUMAN HGNC=9857 UniProtKB=P61224,HUMAN HGNC=11512 UniProtKB=Q9H2B2                                                                                                                                                                                                                                                                                                                                                                                                                                                                                                                                                                                                                                                                                                                                                                                                                                                                                                                                                                                                                                                         | regulation of exocytosis               |
| GO:0048813 | HUMAN HGNC=3338 UniProtKB=Q14247,HUMAN HGNC=15474 UniProtKB=Q9Y566,HUMAN HGNC=2695 UniProtKB=Q16643,HUMAN HGNC=2696 UniProtKB=Q9UJU6,HUMAN HGNC=4844 UniProtKB=P14317,HUMAN HGNC=14294 UniProtKB=Q9BYB0                                                                                                                                                                                                                                                                                                                                                                                                                                                                                                                                                                                                                                                                                                                                                                                                                                                                                                                                                                                                                                                                                                                                                                                             | dendrite morphogenesis                 |
| GO:0012507 | HUMAN HGNC=10534 UniProtKB=Q9NR31,HUMAN HGNC=10701 UniProtKB=Q15436                                                                                                                                                                                                                                                                                                                                                                                                                                                                                                                                                                                                                                                                                                                                                                                                                                                                                                                                                                                                                                                                                                                                                                                                                                                                                                                                 | ER to Golgi transport vesicle membrane |
| GO:0007034 | HUMAN HGNC=20347 UniProtKB=Q9H9C1                                                                                                                                                                                                                                                                                                                                                                                                                                                                                                                                                                                                                                                                                                                                                                                                                                                                                                                                                                                                                                                                                                                                                                                                                                                                                                                                                                   | vacuolar transport                     |
| GO:0010324 | HUMAN HGNC=5575 UniProtKB=A0A0B4J1V2,HUMAN HGNC=607 UniProtKB=P02654,HUMAN HGNC=9784 UniProtKB=P61020,HUMAN HGNC=5645 UniProtKB=A0A0C4DH34,HUMAN HGNC=5549 UniProtKB=A0A0C4DH31,HUMAN HGNC=555 UniProtKB=O43747,HUMAN HGNC=5554 UniProtKB=P01743,HUMAN HGNC=5480 UniProtKB=P01880,HUMAN HGNC=5659 UniProtKB=A0A0C4DH38,HUMAN HGNC=5634 UniProtKB=A0A075B7F0,HUMAN HGNC=38476 UniProtKB=B9A064,HUMAN HGNC=2090 UniProtKB=P09496,HUMAN HGNC=5861 UniProtKB=A0M8Q6,HUMAN HGNC=5647 UniProtKB=A0A087WSY4,HUMAN HGNC=5563 UniProtKB=A0A075B7D0,HUMAN HGNC=5856 UniProtKB=P0DOY2,HUMAN HGNC=1406 UniProtKB=Q9Y698,HUMAN HGNC=3757 UniProtKB=O75955,HUMAN HGNC=5606 UniProtKB=P01763,HUMAN HGNC=9785 UniProtKB=P51148,HUMAN HGNC=9801 UniProtKB=P63000,HUMAN HGNC=5576 UniProtKB=P01817,HUMAN HGNC=5528 UniProtKB=P01861,HUMAN HGNC=5541 UniProtKB=P01871,HUMAN HGNC=5585 UniProtKB=A0A0C4DH32,HUMAN HGNC=9782 UniProtKB=P61018,HUMAN HGNC=9802 UniProtKB=P15153,HUMAN HGNC=5551 UniProtKB=A0A0C4DH33,HUMAN HGNC=3244 UniProtKB=Q9NZN3,HUMAN HGNC=11510 UniProtKB=Q8N9IO,HUMAN HGNC=7228 UniProtKB=P22897,HUMAN HGNC=5526 UniProtKB=P01859,HUMAN HGNC=5657 UniProtKB=P0DP08,HUMAN Ensembl=ENSG00000282639 UniProtKB=A0A0J9YX35,HUMAN HGNC=19760 UniProtKB=Q96T51,HUMAN Gene=HV309_HUMAN UniProtKB=P01782,HUMAN HGNC=18756 UniProtKB=Q9BYZ6,HUMAN HGNC=5654 UniProtKB=P01825,HUMAN HGNC=5553 UniProtKB=A0A0 | membrane invagination                  |

|            |                                                                                                                                                                                                                                                                                                                                                                                                                                                                                                                                                                                                                                                                                                                                                                                                                                                                                                                                                                                                                                                                                                                                                                                                                                                                                                                                                                                                                                                                                                                                                                                                        |                                                  |
|------------|--------------------------------------------------------------------------------------------------------------------------------------------------------------------------------------------------------------------------------------------------------------------------------------------------------------------------------------------------------------------------------------------------------------------------------------------------------------------------------------------------------------------------------------------------------------------------------------------------------------------------------------------------------------------------------------------------------------------------------------------------------------------------------------------------------------------------------------------------------------------------------------------------------------------------------------------------------------------------------------------------------------------------------------------------------------------------------------------------------------------------------------------------------------------------------------------------------------------------------------------------------------------------------------------------------------------------------------------------------------------------------------------------------------------------------------------------------------------------------------------------------------------------------------------------------------------------------------------------------|--------------------------------------------------|
|            | A0MS14,HUMAN Gene=HV108_HUMAN UniProtKB=P0DP01,HUMAN HGNC=5624 UniProtKB=A0A0B4J1X5,HUMAN HGNC=5620 UniProtKB=P01780,HUMAN HGNC=23186 UniProtKB=Q14677,HUMAN HGNC=5598 UniProtKB=A0A0C4DH35,HUMAN HGNC=5580 UniProtKB=P01762,HUMAN HGNC=5633 UniProtKB=A0A075B7D8,HUMAN HGNC=5582 UniProtKB=A0A0B4J1V0,HUMAN HGNC=5478 UniProtKB=P01876,HUMAN HGNC=26068 UniProtKB=Q6IAA8,HUMAN HGNC=5617 UniProtKB=A0A075B6Q5,HUMAN HGNC=711 UniProtKB=P49407,HUMAN HGNC=5594 UniProtKB=P0DP03,HUMAN HGNC=5655 UniProtKB=A0A0C4DH41,HUMAN HGNC=5636 UniProtKB=A0A075B7B8,HUMAN HGNC=5586 UniProtKB=A0A0B4J1V1,HUMAN HGNC=5581 UniProtKB=P01766,HUMAN HGNC=5622 UniProtKB=A0A0B4J1Y9,HUMAN HGNC=5652 UniProtKB=A0A075B6R2,HUMAN HGNC=5593 UniProtKB=P0DP02,HUMAN HGNC=11138 UniProtKB=P37840,HUMAN HGNC=3419 UniProtKB=P42566,HUMAN HGNC=5479 UniProtKB=P01877,HUMAN HGNC=561 UniProtKB=O95782,HUMAN HGNC=5619 UniProtKB=A0A0C4DH42,HUMAN HGNC=5596 UniProtKB=P01772,HUMAN HGNC=5550 UniProtKB=P23083,HUMAN HGNC=5604 UniProtKB=A0A0B4J1X8,HUMAN HGNC=570 UniProtKB=P53677,HUMAN HGNC=2974 UniProtKB=P50570,HUMAN HGNC=5525 UniProtKB=P01857,HUMAN HGNC=5662 UniProtKB=A0A0B4J1U7,HUMAN HGNC=24634 UniProtKB=Q9UBC2,HUMAN HGNC=5601 UniProtKB=A0A0C4DH36,HUMAN HGNC=5716 UniProtKB=P01834,HUMAN HGNC=5588 UniProtKB=P01764,HUMAN HGNC=15578 UniProtKB=Q96D71,HUMAN HGNC=5857 UniProtKB=P0DOY3,HUMAN HGNC=1736 UniProtKB=P60953,HUMAN HGNC=5610 UniProtKB=P01767,HUMAN Ensembl=ENSG00000282150 UniProtKB=A0A0J9YY99,HUMAN HGNC=29125 UniProtKB=Q9UQ16,HUMAN HGNC=5527 UniProtKB=P01860,HUMAN HGNC=2092 UniProtKB=Q00610 |                                                  |
| GO:0009187 | HUMAN HGNC=237 UniProtKB=O43306                                                                                                                                                                                                                                                                                                                                                                                                                                                                                                                                                                                                                                                                                                                                                                                                                                                                                                                                                                                                                                                                                                                                                                                                                                                                                                                                                                                                                                                                                                                                                                        | cyclic nucleotide metabolic process              |
| GO:0009100 | HUMAN HGNC=9411 UniProtKB=P14314                                                                                                                                                                                                                                                                                                                                                                                                                                                                                                                                                                                                                                                                                                                                                                                                                                                                                                                                                                                                                                                                                                                                                                                                                                                                                                                                                                                                                                                                                                                                                                       | glycoprotein metabolic process                   |
| GO:0031406 | HUMAN HGNC=607 UniProtKB=P02654,HUMAN HGNC=1681 UniProtKB=P16070,HUMAN HGNC=317 UniProtKB=P02771,HUMAN HGNC=121 UniProtKB=O15254,HUMAN HGNC=119 UniProtKB=Q15067                                                                                                                                                                                                                                                                                                                                                                                                                                                                                                                                                                                                                                                                                                                                                                                                                                                                                                                                                                                                                                                                                                                                                                                                                                                                                                                                                                                                                                       | carboxylic acid binding                          |
| GO:0019941 | HUMAN HGNC=12458 UniProtKB=P62987,HUMAN HGNC=12468 UniProtKB=P0CG48,HUMAN HGNC=28477 UniProtKB=Q8NBM8,HUMAN HGNC=7732 UniProtKB=Q15843,HUMAN HGNC=12463 UniProtKB=P0CG47                                                                                                                                                                                                                                                                                                                                                                                                                                                                                                                                                                                                                                                                                                                                                                                                                                                                                                                                                                                                                                                                                                                                                                                                                                                                                                                                                                                                                               | modification-dependent protein catabolic process |
| GO:0007600 | HUMAN HGNC=711 UniProtKB=P49407                                                                                                                                                                                                                                                                                                                                                                                                                                                                                                                                                                                                                                                                                                                                                                                                                                                                                                                                                                                                                                                                                                                                                                                                                                                                                                                                                                                                                                                                                                                                                                        | sensory perception                               |
| GO:0000124 | HUMAN HGNC=31797 UniProtKB=P0C7V6,HUMAN HGNC=12347 UniProtKB=Q9Y4A5                                                                                                                                                                                                                                                                                                                                                                                                                                                                                                                                                                                                                                                                                                                                                                                                                                                                                                                                                                                                                                                                                                                                                                                                                                                                                                                                                                                                                                                                                                                                    | SAGA complex                                     |
| GO:0000904 | HUMAN HGNC=13937 UniProtKB=O95866                                                                                                                                                                                                                                                                                                                                                                                                                                                                                                                                                                                                                                                                                                                                                                                                                                                                                                                                                                                                                                                                                                                                                                                                                                                                                                                                                                                                                                                                                                                                                                      | cell morphogenesis involved in differentiation   |
| GO:0008375 | HUMAN HGNC=8127 UniProtKB=O15294                                                                                                                                                                                                                                                                                                                                                                                                                                                                                                                                                                                                                                                                                                                                                                                                                                                                                                                                                                                                                                                                                                                                                                                                                                                                                                                                                                                                                                                                                                                                                                       | acetylglucosaminyltransferase activity           |
| GO:0007131 | HUMAN HGNC=7326 UniProtKB=P20585,HUMAN HGNC=20473 UniProtKB=Q9BX63                                                                                                                                                                                                                                                                                                                                                                                                                                                                                                                                                                                                                                                                                                                                                                                                                                                                                                                                                                                                                                                                                                                                                                                                                                                                                                                                                                                                                                                                                                                                     | reciprocal meiotic recombination                 |
| GO:0060047 | HUMAN HGNC=10582 UniProtKB=Q9Y5Y9                                                                                                                                                                                                                                                                                                                                                                                                                                                                                                                                                                                                                                                                                                                                                                                                                                                                                                                                                                                                                                                                                                                                                                                                                                                                                                                                                                                                                                                                                                                                                                      | heart contraction                                |

|            |                                                                                                                                                                                                                                                                                                                                                                                                                                                                                                                  |                                              |
|------------|------------------------------------------------------------------------------------------------------------------------------------------------------------------------------------------------------------------------------------------------------------------------------------------------------------------------------------------------------------------------------------------------------------------------------------------------------------------------------------------------------------------|----------------------------------------------|
| GO:0006974 | HUMAN   HGNC=12469   UniProtKB=P22314                                                                                                                                                                                                                                                                                                                                                                                                                                                                            | cellular response to DNA damage stimulus     |
| GO:0000038 | HUMAN   HGNC=24175   UniProtKB=Q9P035<br>HUMAN   HGNC=17780   UniProtKB=Q562R1, HUMAN   HGNC=11168   UniProtKB=Q13884, HUMAN   HGNC=6835   UniProtKB=P78559, HUMAN   HGNC=11512   UniProtKB=Q9H2B2                                                                                                                                                                                                                                                                                                               | very long-chain fatty acid metabolic process |
| GO:0045202 |                                                                                                                                                                                                                                                                                                                                                                                                                                                                                                                  | synapse                                      |
| GO:0016877 | HUMAN   HGNC=10996   UniProtKB=O14975                                                                                                                                                                                                                                                                                                                                                                                                                                                                            | ligase activity, forming carbon-sulfur bonds |
| GO:0045055 | HUMAN   HGNC=11491   UniProtKB=P43405, HUMAN   HGNC=9761   UniProtKB=Q15907                                                                                                                                                                                                                                                                                                                                                                                                                                      | regulated exocytosis                         |
| GO:0004620 | HUMAN   HGNC=607   UniProtKB=P02654, HUMAN   HGNC=13921   UniProtKB=O95870                                                                                                                                                                                                                                                                                                                                                                                                                                       | phospholipase activity                       |
| GO:0050870 |                                                                                                                                                                                                                                                                                                                                                                                                                                                                                                                  | positive regulation of T cell activation     |
| GO:0006611 | HUMAN   HGNC=5261   UniProtKB=P10809                                                                                                                                                                                                                                                                                                                                                                                                                                                                             |                                              |
| GO:0005201 | HUMAN   HGNC=2431   UniProtKB=P55060                                                                                                                                                                                                                                                                                                                                                                                                                                                                             | protein export from nucleus                  |
| GO:0042092 | HUMAN   HGNC=3662   UniProtKB=P02675, HUMAN   HGNC=2209   UniProtKB=P20908                                                                                                                                                                                                                                                                                                                                                                                                                                       | extracellular matrix structural constituent  |
| GO:0045766 | HUMAN   HGNC=533   UniProtKB=P04083                                                                                                                                                                                                                                                                                                                                                                                                                                                                              | type 2 immune response                       |
| GO:0006406 | HUMAN   HGNC=533   UniProtKB=P04083                                                                                                                                                                                                                                                                                                                                                                                                                                                                              | positive regulation of angiogenesis          |
| GO:0003700 | HUMAN   HGNC=17821   UniProtKB=O00148, HUMAN   HGNC=19072   UniProtKB=Q96J01                                                                                                                                                                                                                                                                                                                                                                                                                                     | mRNA export from nucleus                     |
| PC00211    | HUMAN   HGNC=9349   UniProtKB=Q9NQX1                                                                                                                                                                                                                                                                                                                                                                                                                                                                             | DNA-binding transcription factor activity    |
| GO:0097120 | HUMAN   HGNC=30391   UniProtKB=Q9UG01, HUMAN   HGNC=21054   UniProtKB=Q86UC2                                                                                                                                                                                                                                                                                                                                                                                                                                     | structural protein                           |
| GO:0048786 | HUMAN   HGNC=6325   UniProtKB=O60282, HUMAN   HGNC=1406   UniProtKB=Q9Y698, HUMAN   HGNC=30377   UniProtKB=Q14160                                                                                                                                                                                                                                                                                                                                                                                                | receptor localization to synapse             |
| GO:0051641 | HUMAN   HGNC=1117   UniProtKB=Q9UPA5, HUMAN   HGNC=13406   UniProtKB=Q9Y6V0, HUMAN   HGNC=8515   UniProtKB=Q9HC10                                                                                                                                                                                                                                                                                                                                                                                                | presynaptic active zone                      |
| GO:0016310 | HUMAN   HGNC=29327   UniProtKB=Q5VZ46                                                                                                                                                                                                                                                                                                                                                                                                                                                                            | cellular localization                        |
| GO:0019725 | HUMAN   HGNC=19296   UniProtKB=Q9UF33, HUMAN   HGNC=2850   UniProtKB=Q9Y6T7                                                                                                                                                                                                                                                                                                                                                                                                                                      | phosphorylation                              |
| GO:0042475 | HUMAN   HGNC=17169   UniProtKB=Q13162, HUMAN   HGNC=16753   UniProtKB=P30041, HUMAN   HGNC=9355   UniProtKB=P30044, HUMAN   HGNC=9353   UniProtKB=P32119, HUMAN   HGNC=9354   UniProtKB=P30048, HUMAN   HGNC=9352   UniProtKB=Q06830, HUMAN   HGNC=4623   UniProtKB=P00390                                                                                                                                                                                                                                       |                                              |
| GO:0072521 | HUMAN   HGNC=3157   UniProtKB=Q92838                                                                                                                                                                                                                                                                                                                                                                                                                                                                             | cellular homeostasis                         |
| GO:0044267 |                                                                                                                                                                                                                                                                                                                                                                                                                                                                                                                  | odontogenesis of dentin-containing tooth     |
|            |                                                                                                                                                                                                                                                                                                                                                                                                                                                                                                                  | purine-containing compound metabolic process |
|            | HUMAN   HGNC=12405   UniProtKB=P02766<br>HUMAN   HGNC=333   UniProtKB=P01019, HUMAN   HGNC=2479   UniProtKB=O76096, HUMAN   HGNC=8583   UniProtKB=P05121, HUMAN   HGNC=3311   UniProtKB=P30740, HUMAN   HGNC=8948   UniProtKB=P29622, HUMAN   HGNC=1546   UniProtKB=P50454, HUMAN   HGNC=8941   UniProtKB=P01009, HUMAN   HGNC=1540   UniProtKB=P08185, HUMAN   HGNC=8824   UniProtKB=P36955, HUMAN   HGNC=19986   UniProtKB=P99999, HUMAN   HGNC=8942   UniProtKB=P48595, HUMAN   HGNC=11512   UniProtKB=Q9H2B2 | cellular protein metabolic process           |

|            |                                                                                                                                                                                                                                                                                                                                                                                                           |                                                              |
|------------|-----------------------------------------------------------------------------------------------------------------------------------------------------------------------------------------------------------------------------------------------------------------------------------------------------------------------------------------------------------------------------------------------------------|--------------------------------------------------------------|
|            | MAN HGNC=1050 UniProtKB=P55957,HUMAN HGNC=3658 UniProtKB=Q9UGM5,HUMAN HGNC=11820 UniProtKB=P01033,HUMAN HGNC=10569 UniProtKB=P29508,HUMAN HGNC=4838 UniProtKB=P05546,HUMAN HGNC=6383 UniProtKB=P01042,HUMAN HGNC=16 UniProtKB=P01011,HUMAN HGNC=775 UniProtKB=P01008,HUMAN HGNC=1228 UniProtKB=P05155,HUMAN HGNC=9075 UniProtKB=P08697,HUMAN HGNC=11583 UniProtKB=P05543,HUMAN HGNC=8955 UniProtKB=P50453 |                                                              |
| GO:0000209 | HUMAN HGNC=12491 UniProtKB=P61081,HUMAN HGNC=12476 UniProtKB=P61077,HUMAN HGNC=16276 UniProtKB=Q9C035,HUMAN HGNC=9261 UniProtKB=Q13356,HUMAN HGNC=17598 UniProtKB=Q9Y385                                                                                                                                                                                                                                  | protein polyubiquitination                                   |
| GO:0046785 | HUMAN HGNC=28959 UniProtKB=Q14008,HUMAN HGNC=14906 UniProtKB=Q8N4C6                                                                                                                                                                                                                                                                                                                                       | microtubule polymerization                                   |
| PC00244    | HUMAN HGNC=7803 UniProtKB=Q12986,HUMAN HGNC=17808 UniProtKB=Q9UPT8                                                                                                                                                                                                                                                                                                                                        | zinc finger transcription factor                             |
| GO:0004725 | HUMAN HGNC=122 UniProtKB=P24666,HUMAN HGNC=9308 UniProtKB=Q15257,HUMAN HGNC=9645 UniProtKB=Q05209,HUMAN HGNC=9673 UniProtKB=Q12913,HUMAN HGNC=29884 UniProtKB=Q8TF42                                                                                                                                                                                                                                      | protein tyrosine phosphatase activity                        |
| GO:0050829 | HUMAN HGNC=2761 UniProtKB=P59665,HUMAN HGNC=6517 UniProtKB=P18428,HUMAN HGNC=1472 UniProtKB=P49913,HUMAN HGNC=6740 UniProtKB=P61626                                                                                                                                                                                                                                                                       | defense response to Gram-negative bacterium<br>organic anion |
| GO:0008514 | HUMAN HGNC=11030 UniProtKB=Q9Y6R1,HUMAN HGNC=11027 UniProtKB=P02730,HUMAN HGNC=11034 UniProtKB=Q2Y0W8                                                                                                                                                                                                                                                                                                     | transmembrane transporter activity                           |
| GO:0046914 | HUMAN HGNC=11180 UniProtKB=P04179                                                                                                                                                                                                                                                                                                                                                                         | transition metal ion binding                                 |
| GO:0034446 | HUMAN HGNC=6616 UniProtKB=P48059,HUMAN HGNC=14653 UniProtKB=Q9HBI1,HUMAN HGNC=6040 UniProtKB=Q13418                                                                                                                                                                                                                                                                                                       | substrate adhesion-dependent cell spreading                  |
| GO:0061564 | HUMAN HGNC=9086 UniProtKB=P60201                                                                                                                                                                                                                                                                                                                                                                          | axon development                                             |
| GO:0050728 | HUMAN HGNC=2479 UniProtKB=O76096,HUMAN HGNC=7967 UniProtKB=Q96RI1                                                                                                                                                                                                                                                                                                                                         | negative regulation of inflammatory response                 |
| GO:0035082 | HUMAN HGNC=15476 UniProtKB=P63167,HUMAN HGNC=15848 UniProtKB=Q14141,HUMAN HGNC=16053 UniProtKB=Q8N1V2,HUMAN HGNC=20908 UniProtKB=Q86YF9,HUMAN HGNC=25631 UniProtKB=Q96MT7,HUMAN HGNC=1717 UniProtKB=Q16181,HUMAN HGNC=3244 UniProtKB=Q9NZN3,HUMAN HGNC=29262 UniProtKB=Q9P2H3,HUMAN HGNC=7729 UniProtKB=Q15019                                                                                            | axoneme assembly                                             |
| GO:0005089 | HUMAN HGNC=21740 UniProtKB=Q6ZV73,HUMAN HGNC=21295 UniProtKB=Q8TE68                                                                                                                                                                                                                                                                                                                                       | Rho guanyl-nucleotide exchange factor activity               |
| GO:0030672 | HUMAN HGNC=11510 UniProtKB=Q8N9I0,HUMAN HGNC=2090 UniProtKB=P09496,HUMAN HGNC=8515 UniProtKB=Q9HC10                                                                                                                                                                                                                                                                                                       | synaptic vesicle membrane                                    |
| GO:0008237 | HUMAN HGNC=7900 UniProtKB=P55786,HUMAN HGNC=15722 UniProtKB=Q8WXQ8,HUMAN HGNC=2300 UniProtKB=Q96IY4,HUMAN HGNC=18173 UniProtKB=Q9NZ08,HUMAN HGNC=2312 UniProtKB=P15169                                                                                                                                                                                                                                    | metallopeptidase activity                                    |
| GO:0034501 | HUMAN HGNC=24054 UniProtKB=Q8NG31,HUMAN HGNC=12401 UniProtKB=P33981                                                                                                                                                                                                                                                                                                                                       | protein localization to kinetochore                          |
| GO:0046040 | HUMAN HGNC=794 UniProtKB=P31939,HUMAN HGNC=5157 UniProtKB=P00492,HUMAN HGNC=469 UniProtKB=Q01433                                                                                                                                                                                                                                                                                                          | IMP metabolic process                                        |
| GO:0000175 | HUMAN HGNC=9207 UniProtKB=Q9UFF9                                                                                                                                                                                                                                                                                                                                                                          | 3'-5'-exoribonuclease activity                               |

|            |                                                                                                                                                                                                                                                                                                                                                                                                                                                                                                                                                                                                                                                                                                                                                                                                                                                             |                                                         |
|------------|-------------------------------------------------------------------------------------------------------------------------------------------------------------------------------------------------------------------------------------------------------------------------------------------------------------------------------------------------------------------------------------------------------------------------------------------------------------------------------------------------------------------------------------------------------------------------------------------------------------------------------------------------------------------------------------------------------------------------------------------------------------------------------------------------------------------------------------------------------------|---------------------------------------------------------|
| GO:0072583 | HUMAN HGNC=2090 UniProtKB=P09496,HUMAN HGNC=561 UniProtKB=O95782                                                                                                                                                                                                                                                                                                                                                                                                                                                                                                                                                                                                                                                                                                                                                                                            | clathrin-dependent endocytosis                          |
| GO:0009062 | HUMAN HGNC=14451 UniProtKB=Q9BQK8                                                                                                                                                                                                                                                                                                                                                                                                                                                                                                                                                                                                                                                                                                                                                                                                                           | fatty acid catabolic process                            |
| GO:0019637 | HUMAN HGNC=4242 UniProtKB=O94808                                                                                                                                                                                                                                                                                                                                                                                                                                                                                                                                                                                                                                                                                                                                                                                                                            | organophosphate metabolic process                       |
| GO:0006760 | HUMAN HGNC=4248 UniProtKB=Q92820                                                                                                                                                                                                                                                                                                                                                                                                                                                                                                                                                                                                                                                                                                                                                                                                                            | folic acid-containing compound metabolic process        |
| GO:0001510 | HUMAN HGNC=17136 UniProtKB=Q8IY81                                                                                                                                                                                                                                                                                                                                                                                                                                                                                                                                                                                                                                                                                                                                                                                                                           | RNA methylation                                         |
| GO:0051056 | HUMAN HGNC=21035 UniProtKB=Q8N392                                                                                                                                                                                                                                                                                                                                                                                                                                                                                                                                                                                                                                                                                                                                                                                                                           | regulation of small GTPase mediated signal transduction |
| GO:0034237 | HUMAN HGNC=12733 UniProtKB=Q9Y6W5,HUMAN HGNC=9380 UniProtKB=P17612,HUMAN HGNC=28164 UniProtKB=Q96M27 UniProtKB=3778 UniProtKB=P02751,HUMAN HGNC=3662 UniProtKB=P02675,HUMAN HGNC=6561 UniProtKB=P09382,HUMAN HGNC=2211 UniProtKB=P12109,HUMAN HGNC=10496 UniProtKB=P06703,HUMAN HGNC=8569 UniProtKB=P29122,HUMAN HGNC=3625 UniProtKB=O75636,HUMAN HGNC=3153 UniProtKB=Q16610,HUMAN HGNC=3694 UniProtKB=P02679,HUMAN HGNC=2213 UniProtKB=P12111,HUMAN HGNC=8601 UniProtKB=Q06141,HUMAN HGNC=3531 UniProtKB=P00488,HUMAN HGNC=2188 UniProtKB=Q99715,HUMAN HGNC=3624 UniProtKB=Q15485 HUMAN HGNC=9141 UniProtKB=Q15126,HUMAN HGNC=4922 UniProtKB=P19367,HUMAN HGNC=9021 UniProtKB=P14618,HUMAN HGNC=24822 UniProtKB=Q9H479,HUMAN HGNC=7850 UniProtKB=P22392,HUMAN HGNC=8997 UniProtKB=P48426,HUMAN HGNC=7849 UniProtKB=P15531,HUMAN HGNC=2850 UniProtKB=Q9Y6T7 | protein kinase A regulatory subunit binding             |
| GO:0062023 |                                                                                                                                                                                                                                                                                                                                                                                                                                                                                                                                                                                                                                                                                                                                                                                                                                                             | collagen-containing extracellular matrix                |
| PC00137    |                                                                                                                                                                                                                                                                                                                                                                                                                                                                                                                                                                                                                                                                                                                                                                                                                                                             | kinase                                                  |
| GO:0005791 | HUMAN HGNC=3530 UniProtKB=P00748                                                                                                                                                                                                                                                                                                                                                                                                                                                                                                                                                                                                                                                                                                                                                                                                                            | rough endoplasmic reticulum                             |
| PC00160    | HUMAN HGNC=8906 UniProtKB=Q96G03,HUMAN HGNC=8905 UniProtKB=P36871,HUMAN HGNC=8888 UniProtKB=P18669,HUMAN HGNC=1093 UniProtKB=P07738                                                                                                                                                                                                                                                                                                                                                                                                                                                                                                                                                                                                                                                                                                                         | mutase                                                  |
| GO:0035097 | HUMAN HGNC=7133 UniProtKB=O14686,HUMAN HGNC=13726 UniProtKB=Q8NEZ4,HUMAN HGNC=18039 UniProtKB=Q9UGL1                                                                                                                                                                                                                                                                                                                                                                                                                                                                                                                                                                                                                                                                                                                                                        | histone methyltransferase complex                       |
| GO:1990126 | HUMAN HGNC=24641 UniProtKB=Q7Z3J2                                                                                                                                                                                                                                                                                                                                                                                                                                                                                                                                                                                                                                                                                                                                                                                                                           | retrograde transport, endosome to plasma membrane       |
| GO:0071805 | HUMAN HGNC=800 UniProtKB=P50993,HUMAN HGNC=806 UniProtKB=P54709                                                                                                                                                                                                                                                                                                                                                                                                                                                                                                                                                                                                                                                                                                                                                                                             | potassium ion transmembrane transport                   |
| GO:0007190 | HUMAN HGNC=4381 UniProtKB=Q14344,HUMAN HGNC=237 UniProtKB=O43306                                                                                                                                                                                                                                                                                                                                                                                                                                                                                                                                                                                                                                                                                                                                                                                            | activation of adenylate cyclase activity                |
| GO:0007409 | HUMAN HGNC=17780 UniProtKB=Q562R1,HUMAN HGNC=6835 UniProtKB=P78559,HUMAN HGNC=18994 UniProtKB=Q8TDC3                                                                                                                                                                                                                                                                                                                                                                                                                                                                                                                                                                                                                                                                                                                                                        | axonogenesis                                            |
| GO:0030705 | HUMAN HGNC=6317 UniProtKB=O43896                                                                                                                                                                                                                                                                                                                                                                                                                                                                                                                                                                                                                                                                                                                                                                                                                            | cytoskeleton-dependent intracellular transport          |
| GO:0043547 | HUMAN HGNC=25694 UniProtKB=Q8TC07,HUMAN HGNC=10632 UniProtKB=P13501,HUMAN HGNC=25361 UniProtKB=Q8N264,HUMAN HGNC=17102 UniProtKB=Q92619,HUMAN HGNC=9859 UniProtKB=P52306,HUMAN HGNC=25571 UniProtKB=Q9NVG8                                                                                                                                                                                                                                                                                                                                                                                                                                                                                                                                                                                                                                                  | positive regulation of GTPase activity                  |

|           |                                                       |                               |
|-----------|-------------------------------------------------------|-------------------------------|
| GO:000558 |                                                       |                               |
| 1         | HUMAN HGNC=2209 UniProtKB=P20908                      | collagen trimer               |
| GO:000584 | HUMAN HGNC=30547 UniProtKB=Q96K17,HUMAN HGNC=18585    |                               |
| 4         | UniProtKB=Q96DH6                                      | polysome                      |
| GO:000852 | HUMAN HGNC=3537 UniProtKB=P25116,HUMAN HGNC=10608     | G protein-coupled peptide     |
| 8         | UniProtKB=P47872                                      | receptor activity             |
| GO:007265 |                                                       | protein localization to       |
| 7         | HUMAN HGNC=1406 UniProtKB=Q9Y698                      | membrane                      |
| GO:001640 |                                                       |                               |
| 9         | HUMAN HGNC=2328 UniProtKB=P50416                      | palmitoyltransferase activity |
|           | HUMAN HGNC=24728 UniProtKB=A2RTX5,HUMAN HGNC=2678     |                               |
|           | UniProtKB=P14868,HUMAN HGNC=20 UniProtKB=P49588,HUMA  |                               |
| GO:000652 | N HGNC=4162 UniProtKB=P41250,HUMAN HGNC=11572 UniProt | cellular amino acid           |
| 0         | KB=P26639,HUMAN HGNC=12729 UniProtKB=P23381           | metabolic process             |
| GO:003245 | HUMAN HGNC=24641 UniProtKB=Q723J2,HUMAN HGNC=3244     |                               |
| 6         | UniProtKB=Q9NZN3                                      | endocytic recycling           |
| GO:000738 |                                                       | pattern specification         |
| 9         | HUMAN HGNC=7002 UniProtKB=A6NDR6                      | process                       |
| GO:003646 | HUMAN HGNC=20165 UniProtKB=Q9P2P1,HUMAN HGNC=5048     | cytoplasmic                   |
| 4         | UniProtKB=Q00839                                      | ribonucleoprotein granule     |
| GO:001995 |                                                       |                               |
| 6         | HUMAN HGNC=6153 UniProtKB=P05556                      | chemokine binding             |
|           | HUMAN HGNC=25951 UniProtKB=Q6ULP2,HUMAN HGNC=20726    |                               |
|           | UniProtKB=Q8WVM8,HUMAN HGNC=16499 UniProtKB=Q96DA2    |                               |
| GO:000013 | ,HUMAN HGNC=6631 UniProtKB=P49257,HUMAN HGNC=15453    |                               |
| 9         | UniProtKB=Q9H3P7                                      | Golgi membrane                |
| GO:000626 |                                                       | DNA-dependent DNA             |
| 1         | HUMAN HGNC=7326 UniProtKB=P20585                      | replication                   |
| GO:004216 |                                                       |                               |
| 8         | HUMAN HGNC=5171 UniProtKB=P02790                      | heme metabolic process        |
| GO:000480 | HUMAN HGNC=6522 UniProtKB=P04180,HUMAN HGNC=108 Uni   |                               |
| 6         | ProtKB=P22303                                         | triglyceride lipase activity  |
| GO:000742 | HUMAN HGNC=15474 UniProtKB=Q9Y566,HUMAN HGNC=7002     |                               |
| 0         | UniProtKB=A6NDR6,HUMAN HGNC=14294 UniProtKB=Q9BYB0    | brain development             |
| GO:000590 |                                                       |                               |
| 3         | HUMAN HGNC=4381 UniProtKB=Q14344                      | brush border                  |
| GO:003030 | HUMAN HGNC=607 UniProtKB=P02654,HUMAN HGNC=603 UniP   |                               |
| 1         | rotKB=P04114                                          | cholesterol transport         |
| GO:003472 | HUMAN HGNC=4716 UniProtKB=P16403,HUMAN HGNC=4718 U    |                               |
| 8         | niProtKB=P10412,HUMAN HGNC=4719 UniProtKB=P16401      | nucleosome organization       |
|           | HUMAN HGNC=25268 UniProtKB=Q96LR9,HUMAN HGNC=607 U    |                               |
|           | niProtKB=P02654,HUMAN HGNC=615 UniProtKB=Q13790,HUMA  |                               |
|           | N HGNC=618 UniProtKB=O14791,HUMAN HGNC=613 UniProtKB  |                               |
|           | =P02649,HUMAN HGNC=600 UniProtKB=P02647,HUMAN HGNC=   |                               |
| PC00052   | 612 UniProtKB=P05090,HUMAN HGNC=603 UniProtKB=P04114  | apolipoprotein                |
| GO:001679 | HUMAN HGNC=6737 UniProtKB=O75608,HUMAN HGNC=3465 U    |                               |
| 0         | niProtKB=P10768                                       | thiolester hydrolase activity |
| GO:000628 |                                                       |                               |
| 1         | HUMAN HGNC=12347 UniProtKB=Q9Y4A5                     | DNA repair                    |
|           | HUMAN HGNC=30025 UniProtKB=Q5VV67,HUMAN HGNC=9885     |                               |
|           | UniProtKB=P29374,HUMAN HGNC=19692 UniProtKB=Q96F24,HU |                               |
|           | MAN HGNC=20250 UniProtKB=Q96IF1,HUMAN HGNC=16272 Uni  |                               |
| PC00217   | ProtKB=Q96JK9                                         | transcription cofactor        |

[illegible]

|            |                                                                                                                                                                                                                                                                                                                                                                                                                                                                                                                                                        |                                                                                  |
|------------|--------------------------------------------------------------------------------------------------------------------------------------------------------------------------------------------------------------------------------------------------------------------------------------------------------------------------------------------------------------------------------------------------------------------------------------------------------------------------------------------------------------------------------------------------------|----------------------------------------------------------------------------------|
| PC00153    | AN HGNC=12585 UniProtKB=P31930,HUMAN HGNC=188 UniProtKB=O14672<br>HUMAN HGNC=12586 UniProtKB=P22695,HUMAN HGNC=5171 UniProtKB=P02790,HUMAN HGNC=199 UniProtKB=O43506,HUMAN HGNC=7176 UniProtKB=P14780,HUMAN HGNC=12585 UniProtKB=P31930,HUMAN HGNC=2300 UniProtKB=Q96IY4,HUMAN HGNC=11763 UniProtKB=P02786,HUMAN HGNC=18449 UniProtKB=P28838,HUMAN HGNC=7900 UniProtKB=P55786,HUMAN HGNC=24437 UniProtKB=Q96KP4,HUMAN HGNC=5381 UniProtKB=P14735,HUMAN HGNC=15722 UniProtKB=Q8WXQ8,HUMAN HGNC=20675 UniProtKB=Q96KN2,HUMAN HGNC=18173 UniProtKB=Q9NZ08 | metalloprotease                                                                  |
| GO:0005802 | HUMAN HGNC=25951 UniProtKB=Q6ULP2,HUMAN HGNC=26486 UniProtKB=Q6PJW8,HUMAN HGNC=9772 UniProtKB=Q13637,HUMAN HGNC=8569 UniProtKB=P29122,HUMAN HGNC=6752 UniProtKB=P20645                                                                                                                                                                                                                                                                                                                                                                                 | trans-Golgi network                                                              |
| GO:0005524 | HUMAN HGNC=8876 UniProtKB=P17858,HUMAN HGNC=9465 UniProtKB=P11908,HUMAN HGNC=20 UniProtKB=P49588,HUMAN HGNC=5239 UniProtKB=P17066,HUMAN HGNC=8878 UniProtKB=Q01813,HUMAN HGNC=823 UniProtKB=P25705,HUMAN HGNC=8898 UniProtKB=P07205,HUMAN HGNC=5241 UniProtKB=P11142,HUMAN HGNC=5253 UniProtKB=P07900,HUMAN HGNC=5258 UniProtKB=P08238,HUMAN HGNC=5238 UniProtKB=P11021,HUMAN HGNC=5240 UniProtKB=P48741,HUMAN HGNC=9462 UniProtKB=P60891                                                                                                              | ATP binding                                                                      |
| GO:0035257 | HUMAN HGNC=6207 UniProtKB=P14923                                                                                                                                                                                                                                                                                                                                                                                                                                                                                                                       | nuclear hormone receptor binding                                                 |
| GO:0045595 | HUMAN HGNC=9583 UniProtKB=P26599,HUMAN HGNC=29884 UniProtKB=Q8TF42                                                                                                                                                                                                                                                                                                                                                                                                                                                                                     | regulation of cell differentiation                                               |
| GO:0008154 | HUMAN HGNC=18271 UniProtKB=Q8N8S7                                                                                                                                                                                                                                                                                                                                                                                                                                                                                                                      | actin polymerization or depolymerization                                         |
| GO:0098839 | HUMAN HGNC=1406 UniProtKB=Q9Y698                                                                                                                                                                                                                                                                                                                                                                                                                                                                                                                       | postsynaptic density membrane                                                    |
| GO:0006627 | HUMAN HGNC=12585 UniProtKB=P31930                                                                                                                                                                                                                                                                                                                                                                                                                                                                                                                      | protein processing involved in protein targeting to mitochondrion                |
| GO:0002695 | HUMAN HGNC=2479 UniProtKB=O76096                                                                                                                                                                                                                                                                                                                                                                                                                                                                                                                       | negative regulation of leukocyte activation                                      |
| PC00097    | HUMAN HGNC=983 UniProtKB=P06276,HUMAN HGNC=16268 UniProtKB=Q8IY17,HUMAN HGNC=16219 UniProtKB=Q8TEA8,HUMAN HGNC=17820 UniProtKB=Q9H0P0,HUMAN HGNC=108 UniProtKB=P22303                                                                                                                                                                                                                                                                                                                                                                                  | esterase                                                                         |
| GO:0001227 | HUMAN HGNC=12879 UniProtKB=P21506                                                                                                                                                                                                                                                                                                                                                                                                                                                                                                                      | DNA-binding transcription repressor activity, RNA polymerase II-specific protein |
| GO:0004712 | HUMAN HGNC=12401 UniProtKB=P33981                                                                                                                                                                                                                                                                                                                                                                                                                                                                                                                      | serine/threonine/tyrosine kinase activity                                        |
| GO:0005125 | HUMAN HGNC=9240 UniProtKB=P02775,HUMAN HGNC=10632 UniProtKB=P13501,HUMAN HGNC=8862 UniProtKB=P10720,HUMAN HGNC=8861 UniProtKB=P02776,HUMAN HGNC=11766 UniProtKB=P01137                                                                                                                                                                                                                                                                                                                                                                                 | cytokine activity                                                                |
| GO:0016616 | HUMAN HGNC=253 UniProtKB=P11766,HUMAN HGNC=5382 UniProtKB=O75874,HUMAN HGNC=6970 UniProtKB=P40925,HUMAN                                                                                                                                                                                                                                                                                                                                                                                                                                                | oxidoreductase activity, acting on the CH-OH group                               |

|            |                                                                                                                                                                                                                                                                                                                                                                                                                                                                                                                                                                                                                                                                                                                                                                                                                                                                                                                                                                                                                                                                                                                                                                                                                                                                                                                                                                                                                                                                                                                                                                                                                                                                                                                                                                                                                                                                                                                                                                                                                                                                                                           |                                                 |
|------------|-----------------------------------------------------------------------------------------------------------------------------------------------------------------------------------------------------------------------------------------------------------------------------------------------------------------------------------------------------------------------------------------------------------------------------------------------------------------------------------------------------------------------------------------------------------------------------------------------------------------------------------------------------------------------------------------------------------------------------------------------------------------------------------------------------------------------------------------------------------------------------------------------------------------------------------------------------------------------------------------------------------------------------------------------------------------------------------------------------------------------------------------------------------------------------------------------------------------------------------------------------------------------------------------------------------------------------------------------------------------------------------------------------------------------------------------------------------------------------------------------------------------------------------------------------------------------------------------------------------------------------------------------------------------------------------------------------------------------------------------------------------------------------------------------------------------------------------------------------------------------------------------------------------------------------------------------------------------------------------------------------------------------------------------------------------------------------------------------------------|-------------------------------------------------|
|            | HGNC=4801   UniProtKB=P40939, HUMAN   HGNC=6535   UniProtKB=P00338, HUMAN   HGNC=6984   UniProtKB=P23368, HUMAN   HGNC=8891   UniProtKB=P52209, HUMAN   HGNC=6971   UniProtKB=P40926, HUMAN   HGNC=6541   UniProtKB=P07195, HUMAN   HGNC=251   UniProtKB=P00326, HUMAN   HGNC=18985   UniProtKB=Q7Z4W1, HUMAN   HGNC=5383   UniProtKB=P48735, HUMAN   HGNC=255   UniProtKB=P28332, HUMAN   HGNC=5386   UniProtKB=P51553, HUMAN   HGNC=380   UniProtKB=P14550                                                                                                                                                                                                                                                                                                                                                                                                                                                                                                                                                                                                                                                                                                                                                                                                                                                                                                                                                                                                                                                                                                                                                                                                                                                                                                                                                                                                                                                                                                                                                                                                                                              | of donors, NAD or NADP as acceptor              |
| GO:0008023 | HUMAN   HGNC=11617   UniProtKB=Q15369, HUMAN   HGNC=11619   UniProtKB=Q15370, HUMAN   HGNC=24224   UniProtKB=Q9NYV4                                                                                                                                                                                                                                                                                                                                                                                                                                                                                                                                                                                                                                                                                                                                                                                                                                                                                                                                                                                                                                                                                                                                                                                                                                                                                                                                                                                                                                                                                                                                                                                                                                                                                                                                                                                                                                                                                                                                                                                       | transcription elongation factor complex         |
| GO:0010506 | HUMAN   HGNC=18423   UniProtKB=O75140, HUMAN   HGNC=2973   UniProtKB=O00429                                                                                                                                                                                                                                                                                                                                                                                                                                                                                                                                                                                                                                                                                                                                                                                                                                                                                                                                                                                                                                                                                                                                                                                                                                                                                                                                                                                                                                                                                                                                                                                                                                                                                                                                                                                                                                                                                                                                                                                                                               | regulation of autophagy                         |
|            | HUMAN   HGNC=26068   UniProtKB=Q6IAA8, HUMAN   HGNC=253   UniProtKB=P11766, HUMAN   HGNC=11179   UniProtKB=P00441, HUMAN   HGNC=9855   UniProtKB=P62834, HUMAN   HGNC=17955   UniProtKB=O43504, HUMAN   HGNC=9353   UniProtKB=P32119, HUMAN   HGNC=251   UniProtKB=P00326, HUMAN   HGNC=533   UniProtKB=P04083, HUMAN   HGNC=9857   UniProtKB=P61224, HUMAN   HGNC=9352   UniProtKB=Q06830, HUMAN   HGNC=255   UniProtKB=P28332, HUMAN   HGNC=15606   UniProtKB=Q9UHA4                                                                                                                                                                                                                                                                                                                                                                                                                                                                                                                                                                                                                                                                                                                                                                                                                                                                                                                                                                                                                                                                                                                                                                                                                                                                                                                                                                                                                                                                                                                                                                                                                                    | cellular response to oxygen-containing compound |
| GO:1901701 | HUMAN   HGNC=3778   UniProtKB=P02751, HUMAN   HGNC=333   UniProtKB=P01019, HUMAN   HGNC=316   UniProtKB=P43652, HUMAN   HGNC=7516   UniProtKB=Q9HC84, HUMAN   HGNC=11085   UniProtKB=O75093, HUMAN   HGNC=10496   UniProtKB=P06703, HUMAN   HGNC=8824   UniProtKB=P36955, HUMAN   HGNC=4831   UniProtKB=P69891, HUMAN   HGNC=38476   UniProtKB=B9A064, HUMAN   HGNC=5877   UniProtKB=P01703, HUMAN   HGNC=5834   UniProtKB=P06312, HUMAN   HGNC=9756   UniProtKB=O00391, HUMAN   HGNC=1472   UniProtKB=P49913, HUMAN   HGNC=8044   UniProtKB=P80303, HUMAN   HGNC=3011   UniProtKB=Q07507, HUMAN   HGNC=7218   UniProtKB=P05164, HUMAN   HGNC=9495   UniProtKB=P24158, HUMAN   HGNC=28883   UniProtKB=Q9H2U2, HUMAN   HGNC=5576   UniProtKB=P01817, HUMAN   HGNC=1540   UniProtKB=P08185, HUMAN   HGNC=11179   UniProtKB=P00441, HUMAN   HGNC=6522   UniProtKB=P04180, HUMAN   HGNC=21265   UniProtKB=Q9NZP8, HUMAN   HGNC=5897   UniProtKB=A0A075B6K4, HUMAN   HGNC=5526   UniProtKB=P01859, HUMAN   HGNC=5739   UniProtKB=A0A075B6S9, HUMAN   HGNC=6561   UniProtKB=P09382, HUMAN   HGNC=5580   UniProtKB=P01762, HUMAN   HGNC=5633   UniProtKB=A0A075B7D8, HUMAN   HGNC=5582   UniProtKB=A0A0B4J1V0, HUMAN   HGNC=11820   UniProtKB=P01033, HUMAN   HGNC=775   UniProtKB=P01008, HUMAN   HGNC=5652   UniProtKB=A0A075B6R2, HUMAN   HGNC=5836   UniProtKB=A0A0C4DH24, HUMAN   HGNC=3662   UniProtKB=P02675, HUMAN   HGNC=5887   UniProtKB=P01706, HUMAN   HGNC=5662   UniProtKB=A0A0B4J1U7, HUMAN   HGNC=5746   UniProtKB=P01611, HUMAN   HGNC=8898   UniProtKB=P07205, HUMAN   HGNC=17213   UniProtKB=Q9BWP8, HUMAN   HGNC=8601   UniProtKB=Q06141, HUMAN   HGNC=5857   UniProtKB=P0DOY3, HUMAN   HGNC=5610   UniProtKB=P01767, HUMAN   HGNC=16   UniProtKB=P01011, HUMAN   Ensembl=ENSG00000282150   UniProtKB=A0A0J9YY99, HUMAN   HGNC=5527   UniProtKB=P01860, HUMAN   HGNC=24588   UniProtKB=Q86XP6, HUMAN   HGNC=108   UniProtKB=P22303, HUMAN   HGNC=584   UniProtKB=P02743, HUMAN   HGNC=5783   UniProtKB=A0A075B6P5, HUMAN   HGNC=5753   UniProtKB=P01593, HUMAN   HGNC=5239   UniProtKB=P1706 | extracellular space                             |
| GO:0005615 |                                                                                                                                                                                                                                                                                                                                                                                                                                                                                                                                                                                                                                                                                                                                                                                                                                                                                                                                                                                                                                                                                                                                                                                                                                                                                                                                                                                                                                                                                                                                                                                                                                                                                                                                                                                                                                                                                                                                                                                                                                                                                                           |                                                 |

6,HUMAN|HGNC=4932|UniProtKB=P01889,HUMAN|HGNC=3625|UniProtKB=O75636,HUMAN|HGNC=5554|UniProtKB=P01743,HUMAN|HGNC=5634|UniProtKB=A0A075B7F0,HUMAN|HGNC=2300|UniProtKB=Q96IY4,HUMAN|HGNC=5931|UniProtKB=A0A075B6I0,HUMAN|HGNC=615|UniProtKB=Q13790,HUMAN|HGNC=8861|UniProtKB=P02776,HUMAN|HGNC=5933|UniProtKB=A0A0B4J1Y8,HUMAN|HGNC=1324|UniProtKB=P0C0L5,HUMAN|HGNC=11583|UniProtKB=P05543,HUMAN|HGNC=5563|UniProtKB=A0A075B7D0,HUMAN|HGNC=8583|UniProtKB=P05121,HUMAN|HGNC=5890|UniProtKB=P01705,HUMAN|HGNC=533|UniProtKB=P04083,HUMAN|HGNC=1095|UniProtKB=P17213,HUMAN|HGNC=7515|UniProtKB=P98088,HUMAN|HGNC=5528|UniProtKB=P01861,HUMAN|HGNC=8941|UniProtKB=P01009,HUMAN|HGNC=5888|UniProtKB=P01704,HUMAN|HGNC=5141|UniProtKB=P00738,HUMAN|HGNC=30456|UniProtKB=Q96DA0,HUMAN|HGNC=3309|UniProtKB=P08246,HUMAN|HGNC=5657|UniProtKB=P0DP08,HUMAN|HGNC=5781|UniProtKB=A0A0C4DH68,HUMAN|HGNC=5901|UniProtKB=A0A075B6K0,HUMAN|HGNC=5743|UniProtKB=A0A0C4DH67,HUMAN|Gene=HV309\_HUMAN|UniProtKB=P01782,HUMAN|HGNC=5468|UniProtKB=P35858,HUMAN|HGNC=2478|UniProtKB=Q15828,HUMAN|HGNC=4620|UniProtKB=P06396,HUMAN|HGNC=3964|UniProtKB=P01225,HUMAN|HGNC=11219|UniProtKB=P09486,HUMAN|HGNC=2689|UniProtKB=P09172,HUMAN|HGNC=3694|UniProtKB=P02679,HUMAN|HGNC=5617|UniProtKB=A0A075B6Q5,HUMAN|HGNC=5594|UniProtKB=P0DP03,HUMAN|HGNC=5735|UniProtKB=A0A075B6S5,HUMAN|HGNC=5636|UniProtKB=A0A075B7B8,HUMAN|HGNC=5581|UniProtKB=P01766,HUMAN|HGNC=613|UniProtKB=P02649,HUMAN|HGNC=3624|UniProtKB=Q15485,HUMAN|HGNC=16948|UniProtKB=Q969H8,HUMAN|HGNC=5479|UniProtKB=P01877,HUMAN|HGNC=16721|UniProtKB=A6NKK9,HUMAN|HGNC=5898|UniProtKB=A0A075B6K2,HUMAN|HGNC=3311|UniProtKB=P30740,HUMAN|HGNC=5882|UniProtKB=P01701,HUMAN|HGNC=9750|UniProtKB=P20742,HUMAN|HGNC=4823|UniProtKB=P69905,HUMAN|HGNC=11891|UniProtKB=P05452,HUMAN|HGNC=5525|UniProtKB=P01857,HUMAN|HGNC=2761|UniProtKB=P59665,HUMAN|HGNC=10632|UniProtKB=P13501,HUMAN|HGNC=3157|UniProtKB=Q92838,HUMAN|HGNC=5741|UniProtKB=P01602,HUMAN|HGNC=12726|UniProtKB=P04275,HUMAN|HGNC=5817|UniProtKB=P01619,HUMAN|HGNC=10497|UniProtKB=P31151,HUMAN|HGNC=10045|UniProtKB=P10153,HUMAN|HGNC=8043|UniProtKB=Q02818,HUMAN|HGNC=5575|UniProtKB=A0A0B4J1V2,HUMAN|HGNC=5825|UniProtKB=A0A0C4DH25,HUMAN|HGNC=11834|UniProtKB=P29401,HUMAN|HGNC=5549|UniProtKB=A0A0C4DH31,HUMAN|HGNC=11092|UniProtKB=P03973,HUMAN|HGNC=43788|UniProtKB=Q8NHM4,HUMAN|HGNC=5480|UniProtKB=P01880,HUMAN|HGNC=5659|UniProtKB=A0A0C4DH38,HUMAN|Gene=KV311\_HUMAN|UniProtKB=P04433,HUMAN|HGNC=6724|UniProtKB=P51884,HUMAN|HGNC=399|UniProtKB=P02768,HUMAN|HGNC=5861|UniProtKB=A0M8Q6,HUMAN|HGNC=5647|UniProtKB=A0A087WSY4,HUMAN|HGNC=5606|UniProtKB=P01763,HUMAN|HGNC=9451|UniProtKB=P04070,HUMAN|HGNC=11937|UniProtKB=P32970,HUMAN|HGNC=8569|UniProtKB=P29122,HUMAN|HGNC=5759|UniProtKB=A0A087WSZ0,HUMAN|HGNC=5541|UniProtKB=P01871,HUMAN|HGNC=5585|UniProtKB=A0A0C4DH32,HUMAN|HGNC=3423|UniProtKB=P

11678,HUMAN|HGNC=11740|UniProtKB=P02787,HUMAN|HGNC=9093|UniProtKB=P55058,HUMAN|Ensembl=ENSG00000282639|UniProtKB=A0A0J9YX35,HUMAN|HGNC=11766|UniProtKB=P01137,HUMAN|HGNC=4439|UniProtKB=P07359,HUMAN|HGNC=4187|UniProtKB=P02774,HUMAN|HGNC=5880|UniProtKB=P01700,HUMAN|HGNC=5624|UniProtKB=A0A0B4J1X5,HUMAN|HGNC=5905|UniProtKB=P80748,HUMAN|HGNC=5896|UniProtKB=P01715,HUMAN|HGNC=3153|UniProtKB=Q16610,HUMAN|HGNC=603|UniProtKB=P04114,HUMAN|HGNC=5478|UniProtKB=P01876,HUMAN|HGNC=2528|UniProtKB=P53634,HUMAN|HGNC=910|UniProtKB=P25311,HUMAN|HGNC=9240|UniProtKB=P02775,HUMAN|HGNC=5240|UniProtKB=P48741,HUMAN|HGNC=3528|UniProtKB=P00742,HUMAN|HGNC=5156|UniProtKB=P00739,HUMAN|HGNC=10046|UniProtKB=P12724,HUMAN|HGNC=5895|UniProtKB=P01709,HUMAN|HGNC=19409|UniProtKB=O43300,HUMAN|HGNC=5619|UniProtKB=A0A0C4DH42,HUMAN|HGNC=2479|UniProtKB=O76096,HUMAN|HGNC=5604|UniProtKB=A0A0B4J1X8,HUMAN|HGNC=8993|UniProtKB=P12273,HUMAN|HGNC=8948|UniProtKB=P29622,HUMAN|HGNC=2475|UniProtKB=P01034,HUMAN|HGNC=15461|UniProtKB=P55145,HUMAN|HGNC=1546|UniProtKB=P50454,HUMAN|HGNC=5821|UniProtKB=A0A075B6H7,HUMAN|HGNC=4827|UniProtKB=P68871,HUMAN|HGNC=3530|UniProtKB=P00748,HUMAN|HGNC=5889|UniProtKB=A0A075B6J9,HUMAN|HGNC=4838|UniProtKB=P05546,HUMAN|HGNC=10499|UniProtKB=P06702,HUMAN|HGNC=2209|UniProtKB=P20908,HUMAN|HGNC=5730|UniProtKB=A0A0C4DH73,HUMAN|HGNC=2092|UniProtKB=Q00610,HUMAN|HGNC=6901|UniProtKB=P48740,HUMAN|HGNC=5879|UniProtKB=P01699,HUMAN|HGNC=4555|UniProtKB=P22352,HUMAN|HGNC=5800|UniProtKB=A0A075B6S2,HUMAN|HGNC=5645|UniProtKB=A0A0C4DH34,HUMAN|HGNC=5742|UniProtKB=A0A0C4DH72,HUMAN|HGNC=5816|UniProtKB=P01624,HUMAN|HGNC=5910|UniProtKB=P01718,HUMAN|HGNC=8942|UniProtKB=P48595,HUMAN|HGNC=9075|UniProtKB=P08697,HUMAN|HGNC=6902|UniProtKB=O00187,HUMAN|HGNC=2312|UniProtKB=P15169,HUMAN|HGNC=16452|UniProtKB=P0DN86,HUMAN|HGNC=21685|UniProtKB=Q6YHK3,HUMAN|HGNC=5856|UniProtKB=P0DOY2,HUMAN|HGNC=2367|UniProtKB=P02741,HUMAN|HGNC=15582|UniProtKB=Q8WXI7,HUMAN|HGNC=5732|UniProtKB=P04430,HUMAN|HGNC=5733|UniProtKB=P01599,HUMAN|HGNC=11756|UniProtKB=Q03403,HUMAN|HGNC=4798|UniProtKB=Q14520,HUMAN|HGNC=9456|UniProtKB=P07225,HUMAN|HGNC=15722|UniProtKB=Q8WXQ8,HUMAN|HGNC=5551|UniProtKB=A0A0C4DH33,HUMAN|HGNC=5927|UniProtKB=P01721,HUMAN|HGNC=5918|UniProtKB=A0A075B6K5,HUMAN|HGNC=5930|UniProtKB=A0A075B6I9,HUMAN|HGNC=5654|UniProtKB=P01825,HUMAN|HGNC=1247|UniProtKB=P09871,HUMAN|HGNC=5553|UniProtKB=A0A0A0MS14,HUMAN|Gene=HV108\_HUMAN|UniProtKB=P0DP01,HUMAN|HGNC=5620|UniProtKB=P01780,HUMAN|HGNC=5598|UniProtKB=A0A0C4DH35,HUMAN|HGNC=5756|UniProtKB=P04432,HUMAN|HGNC=21245|UniProtKB=Q6UXB8,HUMAN|HGNC=6383|UniProtKB=P01042,HUMAN|HGNC=5655|UniProtKB=A0A0C4DH41,HUMAN|HGNC=1228|UniProtKB=P05155,HUMAN|HGNC=5586|UniProtKB=A0A0B4J1V1,HUMAN|HGNC=5622|UniProtKB=A0A0B4J1Y9,HUMAN|HGNC=5785|UniProtKB=P06310,HUMAN|HGNC=5593|UniProtKB=P0DP02,HUMAN|HGNC=6517|UniPro

|            |                                                                                                                                                                                                                                                                                                                                                                                                                                                                                                                                                                                                                                                                     |                                                |
|------------|---------------------------------------------------------------------------------------------------------------------------------------------------------------------------------------------------------------------------------------------------------------------------------------------------------------------------------------------------------------------------------------------------------------------------------------------------------------------------------------------------------------------------------------------------------------------------------------------------------------------------------------------------------------------|------------------------------------------------|
|            | tKB=P18428,HUMAN HGNC=1690 UniProtKB=O43866,HUMAN HGNC=2313 UniProtKB=P22792,HUMAN HGNC=5596 UniProtKB=P01772,HUMAN HGNC=3551 UniProtKB=P00740,HUMAN HGNC=5550 UniProtKB=P23083,HUMAN HGNC=5929 UniProtKB=P04211,HUMAN HGNC=317 UniProtKB=P02771,HUMAN HGNC=13572 UniProtKB=Q9Y6R7,HUMAN HGNC=4829 UniProtKB=P02042,HUMAN HGNC=5908 UniProtKB=P01717,HUMAN HGNC=29953 UniProtKB=Q8WWZ8,HUMAN HGNC=5601 UniProtKB=A0A0C4DH36,HUMAN HGNC=5716 UniProtKB=P01834,HUMAN HGNC=5588 UniProtKB=P01764,HUMAN HGNC=9922 UniProtKB=P02753,HUMAN HGNC=10569 UniProtKB=P29508,HUMAN HGNC=8862 UniProtKB=P10720,HUMAN HGNC=6526 UniProtKB=P80188,HUMAN HGNC=8955 UniProtKB=P50453 |                                                |
| GO:0006402 | HUMAN HGNC=5046 UniProtKB=P52272,HUMAN HGNC=17150 UniProtKB=Q9Y2V2,HUMAN HGNC=5048 UniProtKB=Q00839                                                                                                                                                                                                                                                                                                                                                                                                                                                                                                                                                                 | mRNA catabolic process                         |
| PC00214    | HUMAN HGNC=29327 UniProtKB=Q5VZ46,HUMAN HGNC=2047 UniProtKB=O00501,HUMAN HGNC=11828 UniProtKB=Q9UDY2                                                                                                                                                                                                                                                                                                                                                                                                                                                                                                                                                                | tight junction                                 |
| GO:0006024 |                                                                                                                                                                                                                                                                                                                                                                                                                                                                                                                                                                                                                                                                     | glycosaminoglycan                              |
| GO:0110165 | HUMAN HGNC=24293 UniProtKB=Q70JA7                                                                                                                                                                                                                                                                                                                                                                                                                                                                                                                                                                                                                                   | biosynthetic process                           |
| GO:0010212 | HUMAN HGNC=11317 UniProtKB=Q04837                                                                                                                                                                                                                                                                                                                                                                                                                                                                                                                                                                                                                                   | cellular anatomical entity                     |
| GO:0000993 | HUMAN HGNC=28771 UniProtKB=Q9BVC6,HUMAN HGNC=533 UniProtKB=P04083                                                                                                                                                                                                                                                                                                                                                                                                                                                                                                                                                                                                   | response to ionizing radiation                 |
|            |                                                                                                                                                                                                                                                                                                                                                                                                                                                                                                                                                                                                                                                                     | RNA polymerase II complex binding              |
| GO:0007249 | HUMAN HGNC=5048 UniProtKB=Q00839                                                                                                                                                                                                                                                                                                                                                                                                                                                                                                                                                                                                                                    |                                                |
|            | HUMAN HGNC=30140 UniProtKB=A7MCY6,HUMAN HGNC=16391 UniProtKB=Q9H257,HUMAN HGNC=16276 UniProtKB=Q9C035,HUMAN HGNC=29890 UniProtKB=Q86UT6,HUMAN HGNC=9275 UniProtKB=P35813                                                                                                                                                                                                                                                                                                                                                                                                                                                                                            | I-kappaB kinase/NF-kappaB signaling            |
| GO:0009986 | HUMAN HGNC=453 UniProtKB=P02760,HUMAN HGNC=5253 UniProtKB=P07900,HUMAN HGNC=6156 UniProtKB=P05106,HUMAN HGNC=30167 UniProtKB=P13667,HUMAN HGNC=5258 UniProtKB=P08238,HUMAN HGNC=10661 UniProtKB=P31431,HUMAN HGNC=6153 UniProtKB=P05556,HUMAN HGNC=8569 UniProtKB=P29122,HUMAN HGNC=29953 UniProtKB=Q8WWZ8,HUMAN HGNC=4606 UniProtKB=P30101                                                                                                                                                                                                                                                                                                                         | cell surface                                   |
| PC00034    | HUMAN HGNC=11442 UniProtKB=O15400,HUMAN HGNC=11429 UniProtKB=O75558,HUMAN HGNC=11133 UniProtKB=O95721,HUMAN HGNC=11131 UniProtKB=O00161                                                                                                                                                                                                                                                                                                                                                                                                                                                                                                                             | SNARE protein                                  |
| GO:0050727 |                                                                                                                                                                                                                                                                                                                                                                                                                                                                                                                                                                                                                                                                     | regulation of inflammatory response            |
| GO:0000813 | HUMAN HGNC=533 UniProtKB=P04083                                                                                                                                                                                                                                                                                                                                                                                                                                                                                                                                                                                                                                     |                                                |
| GO:0030992 | HUMAN HGNC=25153 UniProtKB=Q96EY5                                                                                                                                                                                                                                                                                                                                                                                                                                                                                                                                                                                                                                   | ESCRT I complex                                |
|            | HUMAN HGNC=30391 UniProtKB=Q9UG01,HUMAN HGNC=14313 UniProtKB=Q8WYAO,HUMAN HGNC=29262 UniProtKB=Q9P2H3                                                                                                                                                                                                                                                                                                                                                                                                                                                                                                                                                               | intracellular transport                        |
| GO:0043277 | HUMAN HGNC=18756 UniProtKB=Q9BYZ6,HUMAN HGNC=9802 UniProtKB=P15153,HUMAN HGNC=9801 UniProtKB=P63000,HUMAN HGNC=533 UniProtKB=P04083                                                                                                                                                                                                                                                                                                                                                                                                                                                                                                                                 | particle B                                     |
| GO:1905475 |                                                                                                                                                                                                                                                                                                                                                                                                                                                                                                                                                                                                                                                                     | apoptotic cell clearance                       |
| GO:0005840 | HUMAN HGNC=26486 UniProtKB=Q6PJW8,HUMAN HGNC=17643 UniProtKB=Q9HD26                                                                                                                                                                                                                                                                                                                                                                                                                                                                                                                                                                                                 | regulation of protein localization to membrane |
| GO:0046434 | HUMAN HGNC=30547 UniProtKB=Q96K17                                                                                                                                                                                                                                                                                                                                                                                                                                                                                                                                                                                                                                   | ribosome                                       |
|            | HUMAN HGNC=4456 UniProtKB=P43304,HUMAN HGNC=6050 UniProtKB=P29218                                                                                                                                                                                                                                                                                                                                                                                                                                                                                                                                                                                                   | organophosphate catabolic process              |

|            |                                                                                                                                                                                                                                                                                                                                                                                                                                                    |                                                                        |
|------------|----------------------------------------------------------------------------------------------------------------------------------------------------------------------------------------------------------------------------------------------------------------------------------------------------------------------------------------------------------------------------------------------------------------------------------------------------|------------------------------------------------------------------------|
| GO:0019318 | HUMAN HGNC=4116 UniProtKB=Q14376                                                                                                                                                                                                                                                                                                                                                                                                                   | hexose metabolic process                                               |
| GO:0002443 | HUMAN HGNC=11491 UniProtKB=P43405                                                                                                                                                                                                                                                                                                                                                                                                                  | leukocyte mediated immunity                                            |
| GO:0000778 | HUMAN HGNC=9112 UniProtKB=Q6P1K2                                                                                                                                                                                                                                                                                                                                                                                                                   | condensed nuclear chromosome kinetochore                               |
| PC00088    | HUMAN HGNC=469 UniProtKB=Q01433                                                                                                                                                                                                                                                                                                                                                                                                                    | deaminase                                                              |
| GO:0032300 | HUMAN HGNC=7127 UniProtKB=P40692,HUMAN HGNC=7326 UniProtKB=P20585                                                                                                                                                                                                                                                                                                                                                                                  | mismatch repair complex cysteine-type endopeptidase inhibitor activity |
| GO:0004869 | HUMAN HGNC=2479 UniProtKB=O76096,HUMAN HGNC=6383 UniProtKB=P01042,HUMAN HGNC=2482 UniProtKB=P04080                                                                                                                                                                                                                                                                                                                                                 | DNA recombination                                                      |
| GO:0006310 | HUMAN HGNC=4716 UniProtKB=P16403,HUMAN HGNC=4718 UniProtKB=P10412,HUMAN HGNC=4719 UniProtKB=P16401                                                                                                                                                                                                                                                                                                                                                 |                                                                        |
|            | HUMAN HGNC=15476 UniProtKB=P63167,HUMAN HGNC=15848 UniProtKB=Q14141,HUMAN HGNC=16053 UniProtKB=Q8N1V2,HUMAN HGNC=20908 UniProtKB=Q86YF9,HUMAN HGNC=2952 UniProtKB=Q96JB1,HUMAN HGNC=25631 UniProtKB=Q96MT7,HUMAN HGNC=1717 UniProtKB=Q16181,HUMAN HGNC=3244 UniProtKB=Q9NZN3,HUMAN HGNC=29262 UniProtKB=Q9P2H3,HUMAN HGNC=7729 UniProtKB=Q15019                                                                                                    | vesicle targeting, trans-Golgi to periciliary membrane compartment     |
| GO:0097712 | HUMAN HGNC=692 UniProtKB=P40616,HUMAN HGNC=8761 UniProtKB=Q9BUL8,HUMAN HGNC=2479 UniProtKB=O76096,HUMAN HGNC=14902 UniProtKB=Q9NRW1,HUMAN HGNC=21354 UniProtKB=Q86XR7,HUMAN HGNC=24251 UniProtKB=Q9Y3A6,HUMAN HGNC=555 UniProtKB=O43747,HUMAN HGNC=17643 UniProtKB=Q9HD26,HUMAN HGNC=9786 UniProtKB=P20340,HUMAN HGNC=16075 UniProtKB=Q9H082,HUMAN HGNC=16998 UniProtKB=P49755,HUMAN HGNC=16996 UniProtKB=Q15363,HUMAN HGNC=24878 UniProtKB=Q9BVK6 |                                                                        |
| GO:0005794 | HUMAN HGNC=15713 UniProtKB=Q9UJX4,HUMAN HGNC=12401 UniProtKB=P33981,HUMAN HGNC=14452 UniProtKB=Q9NYG5                                                                                                                                                                                                                                                                                                                                              | Golgi apparatus                                                        |
| GO:0051306 | HUMAN HGNC=30025 UniProtKB=Q5VV67,HUMAN HGNC=6767 UniProtKB=Q15797,HUMAN HGNC=5048 UniProtKB=Q00839                                                                                                                                                                                                                                                                                                                                                | mitotic sister chromatid separation                                    |
| GO:0008134 |                                                                                                                                                                                                                                                                                                                                                                                                                                                    | transcription factor binding                                           |
| GO:0004518 | HUMAN HGNC=30646 UniProtKB=Q7KZF4                                                                                                                                                                                                                                                                                                                                                                                                                  | nuclease activity                                                      |
|            | HUMAN HGNC=23151 UniProtKB=Q86UX7,HUMAN HGNC=3662 UniProtKB=P02675,HUMAN HGNC=11491 UniProtKB=P43405,HUMAN HGNC=11845 UniProtKB=Q9Y490,HUMAN HGNC=29884 UniProtKB=Q8TF42                                                                                                                                                                                                                                                                           |                                                                        |
| GO:0070527 | HUMAN HGNC=6616 UniProtKB=P48059,HUMAN HGNC=243 UniProtKB=P35611                                                                                                                                                                                                                                                                                                                                                                                   | platelet aggregation                                                   |
| GO:0010720 |                                                                                                                                                                                                                                                                                                                                                                                                                                                    | positive regulation of cell development                                |
|            |                                                                                                                                                                                                                                                                                                                                                                                                                                                    | regulation of plasma membrane bounded cell projection organization     |
| GO:0120035 | HUMAN HGNC=12690 UniProtKB=P09327,HUMAN HGNC=25361 UniProtKB=Q8N264,HUMAN HGNC=21295 UniProtKB=Q8TE68                                                                                                                                                                                                                                                                                                                                              |                                                                        |
|            | HUMAN HGNC=8601 UniProtKB=Q06141,HUMAN HGNC=1681 UniProtKB=P16070,HUMAN HGNC=30013 UniProtKB=Q96PD5,HUMAN HGNC=544 UniProtKB=P08133                                                                                                                                                                                                                                                                                                                |                                                                        |
| GO:0005539 |                                                                                                                                                                                                                                                                                                                                                                                                                                                    | glycosaminoglycan binding                                              |
| GO:0098969 | HUMAN HGNC=7007 UniProtKB=P61006                                                                                                                                                                                                                                                                                                                                                                                                                   | neurotransmitter receptor transport to postsynaptic membrane           |
| GO:0030140 | HUMAN HGNC=25951 UniProtKB=Q6ULP2,HUMAN HGNC=31332 UniProtKB=Q6IQ22,HUMAN HGNC=7007 UniProtKB=P61006,HUMAN HGNC=7007 UniProtKB=P61006                                                                                                                                                                                                                                                                                                              | trans-Golgi network transport vesicle                                  |

|            |                                                                                                                                                                                                                                                                                                                                                                                                                                                                                                                                                                                                                                                                                                                                                                                                                                                                                                                                                                                                                                                                                                                                                                                                                                                                                                                                                                                                                                                                                                                                                                                                                                                                                                                                                                                                                                                                                                                                                                                                                                                                                                                                                                              |                                       |
|------------|------------------------------------------------------------------------------------------------------------------------------------------------------------------------------------------------------------------------------------------------------------------------------------------------------------------------------------------------------------------------------------------------------------------------------------------------------------------------------------------------------------------------------------------------------------------------------------------------------------------------------------------------------------------------------------------------------------------------------------------------------------------------------------------------------------------------------------------------------------------------------------------------------------------------------------------------------------------------------------------------------------------------------------------------------------------------------------------------------------------------------------------------------------------------------------------------------------------------------------------------------------------------------------------------------------------------------------------------------------------------------------------------------------------------------------------------------------------------------------------------------------------------------------------------------------------------------------------------------------------------------------------------------------------------------------------------------------------------------------------------------------------------------------------------------------------------------------------------------------------------------------------------------------------------------------------------------------------------------------------------------------------------------------------------------------------------------------------------------------------------------------------------------------------------------|---------------------------------------|
|            | MAN HGNC=555 UniProtKB=O43747,HUMAN HGNC=17643 UniProtKB=Q9HD26                                                                                                                                                                                                                                                                                                                                                                                                                                                                                                                                                                                                                                                                                                                                                                                                                                                                                                                                                                                                                                                                                                                                                                                                                                                                                                                                                                                                                                                                                                                                                                                                                                                                                                                                                                                                                                                                                                                                                                                                                                                                                                              |                                       |
|            | HUMAN HGNC=5575 UniProtKB=A0A0B4J1V2,HUMAN HGNC=5645 UniProtKB=A0A0C4DH34,HUMAN HGNC=5549 UniProtKB=A0A0C4DH31,HUMAN HGNC=5554 UniProtKB=P01743,HUMAN HGNC=5480 UniProtKB=P01880,HUMAN HGNC=5659 UniProtKB=A0A0C4DH38,HUMAN HGNC=5634 UniProtKB=A0A075B7F0,HUMAN HGNC=38476 UniProtKB=B9A064,HUMAN HGNC=5861 UniProtKB=A0M8Q6,HUMAN HGNC=5647 UniProtKB=A0A087WSY4,HUMAN HGNC=5563 UniProtKB=A0A075B7D0,HUMAN HGNC=5856 UniProtKB=P0DOY2,HUMAN HGNC=5606 UniProtKB=P01763,HUMAN HGNC=9495 UniProtKB=P24158,HUMAN HGNC=5576 UniProtKB=P01817,HUMAN HGNC=5528 UniProtKB=P01861,HUMAN HGNC=5541 UniProtKB=P01871,HUMAN HGNC=5585 UniProtKB=A0A0C4DH32,HUMAN HGNC=535 UniProtKB=P50995,HUMAN HGNC=3309 UniProtKB=P08246,HUMAN HGNC=5551 UniProtKB=A0A0C4DH33,HUMAN HGNC=5526 UniProtKB=P01859,HUMAN HGNC=5657 UniProtKB=P0DP08,HUMAN Ensembl=ENSG00000282639 UniProtKB=A0A0J9YX35,HUMAN Gene=HV309_HUMAN UniProtKB=P01782,HUMAN HGNC=5654 UniProtKB=P01825,HUMAN HGNC=5553 UniProtKB=A0A0A0MS14,HUMAN Gene=HV108_HUMAN UniProtKB=P0DP01,HUMAN HGNC=5624 UniProtKB=A0A0B4J1X5,HUMAN HGNC=5620 UniProtKB=P01780,HUMAN HGNC=5598 UniProtKB=A0A0C4DH35,HUMAN HGNC=5580 UniProtKB=P01762,HUMAN HGNC=5633 UniProtKB=A0A075B7D8,HUMAN HGNC=5582 UniProtKB=A0A0B4J1V0,HUMAN HGNC=5478 UniProtKB=P01876,HUMAN HGNC=9788 UniProtKB=P51149,HUMAN HGNC=5617 UniProtKB=A0A075B6Q5,HUMAN HGNC=5594 UniProtKB=P0DP03,HUMAN HGNC=5655 UniProtKB=A0A0C4DH41,HUMAN HGNC=5636 UniProtKB=A0A075B7B8,HUMAN HGNC=5586 UniProtKB=A0A0B4J1V1,HUMAN HGNC=5581 UniProtKB=P01766,HUMAN HGNC=5622 UniProtKB=A0A0B4J1Y9,HUMAN HGNC=5652 UniProtKB=A0A075B6R2,HUMAN HGNC=5593 UniProtKB=P0DP02,HUMAN HGNC=5479 UniProtKB=P01877,HUMAN HGNC=5619 UniProtKB=A0A0C4DH42,HUMAN HGNC=5596 UniProtKB=P01772,HUMAN HGNC=5550 UniProtKB=P23083,HUMAN HGNC=5604 UniProtKB=A0A0B4J1X8,HUMAN HGNC=5525 UniProtKB=P01857,HUMAN HGNC=5662 UniProtKB=A0A0B4J1U7,HUMAN HGNC=5601 UniProtKB=A0A0C4DH36,HUMAN HGNC=5716 UniProtKB=P01834,HUMAN HGNC=5588 UniProtKB=P01764,HUMAN HGNC=5857 UniProtKB=P0DOY3,HUMAN HGNC=5610 UniProtKB=P01767,HUMAN Ensembl=ENSG00000282150 UniProtKB=A0A0J9YY99,HUMAN HGNC=5527 UniProtKB=P01860 |                                       |
| GO:0006909 | HUMAN HGNC=26068 UniProtKB=Q6IAA8,HUMAN HGNC=20120 UniProtKB=Q17RC7,HUMAN HGNC=9621 UniProtKB=Q6IBS0,HUMAN HGNC=9164 UniProtKB=Q99719,HUMAN HGNC=11881 UniProtKB=P62328                                                                                                                                                                                                                                                                                                                                                                                                                                                                                                                                                                                                                                                                                                                                                                                                                                                                                                                                                                                                                                                                                                                                                                                                                                                                                                                                                                                                                                                                                                                                                                                                                                                                                                                                                                                                                                                                                                                                                                                                      | phagocytosis                          |
| GO:0034613 |                                                                                                                                                                                                                                                                                                                                                                                                                                                                                                                                                                                                                                                                                                                                                                                                                                                                                                                                                                                                                                                                                                                                                                                                                                                                                                                                                                                                                                                                                                                                                                                                                                                                                                                                                                                                                                                                                                                                                                                                                                                                                                                                                                              | cellular protein localization         |
| GO:0034381 | HUMAN HGNC=607 UniProtKB=P02654                                                                                                                                                                                                                                                                                                                                                                                                                                                                                                                                                                                                                                                                                                                                                                                                                                                                                                                                                                                                                                                                                                                                                                                                                                                                                                                                                                                                                                                                                                                                                                                                                                                                                                                                                                                                                                                                                                                                                                                                                                                                                                                                              | plasma lipoprotein particle clearance |
| GO:0031307 |                                                                                                                                                                                                                                                                                                                                                                                                                                                                                                                                                                                                                                                                                                                                                                                                                                                                                                                                                                                                                                                                                                                                                                                                                                                                                                                                                                                                                                                                                                                                                                                                                                                                                                                                                                                                                                                                                                                                                                                                                                                                                                                                                                              | integral component of                 |
| GO:0001706 | HUMAN HGNC=21689 UniProtKB=Q9Y3D6                                                                                                                                                                                                                                                                                                                                                                                                                                                                                                                                                                                                                                                                                                                                                                                                                                                                                                                                                                                                                                                                                                                                                                                                                                                                                                                                                                                                                                                                                                                                                                                                                                                                                                                                                                                                                                                                                                                                                                                                                                                                                                                                            | mitochondrial outer membrane          |
|            | HUMAN HGNC=2188 UniProtKB=Q99715                                                                                                                                                                                                                                                                                                                                                                                                                                                                                                                                                                                                                                                                                                                                                                                                                                                                                                                                                                                                                                                                                                                                                                                                                                                                                                                                                                                                                                                                                                                                                                                                                                                                                                                                                                                                                                                                                                                                                                                                                                                                                                                                             | endoderm formation                    |

|           |                                                                                                                                                                                                                                                                                                           |                                                          |
|-----------|-----------------------------------------------------------------------------------------------------------------------------------------------------------------------------------------------------------------------------------------------------------------------------------------------------------|----------------------------------------------------------|
| GO:000081 |                                                                                                                                                                                                                                                                                                           |                                                          |
| 1         | HUMAN HGNC=26200 UniProtKB=Q9H668                                                                                                                                                                                                                                                                         | GINS complex                                             |
|           | HUMAN HGNC=3602 UniProtKB=Q9UBX5,HUMAN HGNC=2209 UniProtKB=P20908,HUMAN HGNC=6714 UniProtKB=Q14766,HUMAN HGNC=2188 UniProtKB=Q99715,HUMAN HGNC=2211 UniProtKB=P12109,HUMAN HGNC=6922 UniProtKB=P11226,HUMAN HGNC=15855 UniProtKB=Q9NPY3,HUMAN HGNC=3218 UniProtKB=Q12805,HUMAN HGNC=2213 UniProtKB=P12111 | extracellular matrix structural protein                  |
| PC00103   |                                                                                                                                                                                                                                                                                                           | cellular response to hormone stimulus                    |
| GO:003287 |                                                                                                                                                                                                                                                                                                           |                                                          |
| 0         | HUMAN HGNC=7670 UniProtKB=Q9Y6Q9                                                                                                                                                                                                                                                                          |                                                          |
| GO:000648 |                                                                                                                                                                                                                                                                                                           |                                                          |
| 2         | HUMAN HGNC=30178 UniProtKB=Q9Y570                                                                                                                                                                                                                                                                         | protein demethylation                                    |
|           | HUMAN HGNC=31332 UniProtKB=Q6IQ22,HUMAN HGNC=7007 UniProtKB=P61006,HUMAN HGNC=9021 UniProtKB=P14618,HUMAN HGNC=14451 UniProtKB=Q9BQK8                                                                                                                                                                     | cellular response to insulin stimulus                    |
| GO:003286 |                                                                                                                                                                                                                                                                                                           |                                                          |
| 9         |                                                                                                                                                                                                                                                                                                           |                                                          |
| GO:001624 |                                                                                                                                                                                                                                                                                                           |                                                          |
| 7         | HUMAN HGNC=1406 UniProtKB=Q9Y698                                                                                                                                                                                                                                                                          | channel regulator activity                               |
| GO:004663 |                                                                                                                                                                                                                                                                                                           | alpha-beta T cell differentiation                        |
| 2         | HUMAN HGNC=6171 UniProtKB=Q08881,HUMAN HGNC=533 UniProtKB=P04083                                                                                                                                                                                                                                          | extracellular matrix glycoprotein                        |
|           | HUMAN HGNC=11219 UniProtKB=P09486,HUMAN HGNC=2464 UniProtKB=P13611                                                                                                                                                                                                                                        |                                                          |
| PC00100   |                                                                                                                                                                                                                                                                                                           |                                                          |
|           | HUMAN HGNC=8898 UniProtKB=P07205,HUMAN HGNC=8876 UniProtKB=P17858,HUMAN HGNC=8878 UniProtKB=Q01813                                                                                                                                                                                                        | carbohydrate kinase activation of innate immune response |
| PC00065   |                                                                                                                                                                                                                                                                                                           |                                                          |
| GO:000221 |                                                                                                                                                                                                                                                                                                           |                                                          |
| 8         | HUMAN HGNC=7183 UniProtKB=P41218                                                                                                                                                                                                                                                                          |                                                          |
|           | HUMAN HGNC=27424 UniProtKB=Q5T481,HUMAN HGNC=3778 UniProtKB=P02751,HUMAN HGNC=2067 UniProtKB=O00151,HUMAN HGNC=17468 UniProtKB=Q96HC4,HUMAN HGNC=22958 UniProtKB=Q9NR12                                                                                                                                   | heart development                                        |
| GO:000750 |                                                                                                                                                                                                                                                                                                           |                                                          |
| 7         | HUMAN HGNC=28101 UniProtKB=Q2M2H8,HUMAN HGNC=4138 UniProtKB=Q14697                                                                                                                                                                                                                                        | glucosidase                                              |
| PC00108   |                                                                                                                                                                                                                                                                                                           |                                                          |
|           | HUMAN HGNC=9065 UniProtKB=P19174,HUMAN HGNC=613 UniProtKB=P02649,HUMAN HGNC=1869 UniProtKB=P11597,HUMAN HGNC=9093 UniProtKB=P55058                                                                                                                                                                        | multicellular organismal process                         |
| GO:003250 |                                                                                                                                                                                                                                                                                                           |                                                          |
| 1         |                                                                                                                                                                                                                                                                                                           |                                                          |
| GO:000660 |                                                                                                                                                                                                                                                                                                           |                                                          |
| 5         | HUMAN HGNC=13206 UniProtKB=O60296                                                                                                                                                                                                                                                                         | protein targeting                                        |
|           | HUMAN HGNC=4827 UniProtKB=P68871,HUMAN HGNC=4831 UniProtKB=P69891,HUMAN HGNC=4823 UniProtKB=P69905,HUMAN HGNC=4829 UniProtKB=P02042                                                                                                                                                                       | organic acid binding                                     |
| GO:004317 |                                                                                                                                                                                                                                                                                                           | basic leucine zipper transcription factor                |
| 7         |                                                                                                                                                                                                                                                                                                           | muscle structure development                             |
| PC00056   |                                                                                                                                                                                                                                                                                                           |                                                          |
|           | HUMAN HGNC=18808 UniProtKB=Q9Y6E2                                                                                                                                                                                                                                                                         |                                                          |
| GO:006106 |                                                                                                                                                                                                                                                                                                           |                                                          |
|           | HUMAN HGNC=2067 UniProtKB=O00151,HUMAN HGNC=17468 UniProtKB=Q96HC4,HUMAN HGNC=22958 UniProtKB=Q9NR12                                                                                                                                                                                                      |                                                          |
| GO:000378 |                                                                                                                                                                                                                                                                                                           |                                                          |
|           | HUMAN HGNC=9621 UniProtKB=Q6IBS0,HUMAN HGNC=11881 UniProtKB=P62328                                                                                                                                                                                                                                        | actin monomer binding                                    |
| GO:000549 |                                                                                                                                                                                                                                                                                                           |                                                          |
|           | HUMAN HGNC=4187 UniProtKB=P02774,HUMAN HGNC=10839 UniProtKB=P04278                                                                                                                                                                                                                                        | steroid binding                                          |
| GO:003025 |                                                                                                                                                                                                                                                                                                           |                                                          |
|           | HUMAN HGNC=30244 UniProtKB=Q6P1A2,HUMAN HGNC=2850 UniProtKB=Q9Y6T7                                                                                                                                                                                                                                        | lipid modification                                       |
| GO:009030 |                                                                                                                                                                                                                                                                                                           | positive regulation of wound healing                     |
|           | HUMAN HGNC=3537 UniProtKB=P25116,HUMAN HGNC=533 UniProtKB=P04083                                                                                                                                                                                                                                          |                                                          |
| 3         |                                                                                                                                                                                                                                                                                                           |                                                          |
|           | HUMAN HGNC=1165 UniProtKB=Q9Y4D2,HUMAN HGNC=20175 UniProtKB=Q9Y3E0                                                                                                                                                                                                                                        | lipase                                                   |
| PC00143   |                                                                                                                                                                                                                                                                                                           |                                                          |

|           |                                                       |                            |
|-----------|-------------------------------------------------------|----------------------------|
| GO:004353 |                                                       | protein serine/threonine   |
| 9         | HUMAN HGNC=20292 UniProtKB=Q9Y376                     | kinase activator activity  |
| GO:001714 | HUMAN HGNC=4045 UniProtKB=O75084,HUMAN HGNC=11119     |                            |
| 7         | UniProtKB=Q99835                                      | Wnt-protein binding        |
| GO:000734 |                                                       | regulation of mitotic cell |
| 6         | HUMAN HGNC=18673 UniProtKB=Q96JB5                     | cycle                      |
| GO:001648 | HUMAN HGNC=2479 UniProtKB=O76096,HUMAN HGNC=8569 U    |                            |
| 5         | niProtKB=P29122,HUMAN HGNC=2312 UniProtKB=P15169      | protein processing         |
| GO:001631 | HUMAN HGNC=5461 UniProtKB=P78318,HUMAN HGNC=6050 U    |                            |
| 1         | niProtKB=P29218                                       | dephosphorylation          |
| GO:003065 | HUMAN HGNC=25951 UniProtKB=Q6ULP2,HUMAN HGNC=555 U    |                            |
| 8         | niProtKB=O43747                                       | transport vesicle membrane |
|           | HUMAN HGNC=25951 UniProtKB=Q6ULP2,HUMAN HGNC=11984    |                            |
|           | UniProtKB=Q6ZVM7,HUMAN HGNC=11510 UniProtKB=Q8N9I0,H  |                            |
|           | UMAN HGNC=555 UniProtKB=O43747,HUMAN HGNC=23186 Uni   |                            |
|           | ProtKB=Q14677,HUMAN HGNC=2092 UniProtKB=Q00610,HUMA   |                            |
|           | N HGNC=13667 UniProtKB=Q9BXS5,HUMAN HGNC=2090 UniPro  |                            |
| GO:003027 | tKB=P09496,HUMAN HGNC=561 UniProtKB=O95782,HUMAN HG   |                            |
| 6         | NC=11512 UniProtKB=Q9H2B2                             | clathrin binding           |
|           |                                                       | RNA polymerase II          |
| GO:009057 | HUMAN HGNC=6767 UniProtKB=Q15797,HUMAN HGNC=23688     | transcription regulator    |
| 5         | UniProtKB=Q86UU0,HUMAN HGNC=5048 UniProtKB=Q00839     | complex                    |
| GO:003110 | HUMAN HGNC=6891 UniProtKB=Q15555,HUMAN HGNC=6890 U    | microtubule polymerization |
| 9         | niProtKB=Q15691                                       | or depolymerization        |
| GO:003001 |                                                       |                            |
| 4         | HUMAN HGNC=9207 UniProtKB=Q9UFF9                      | CCR4-NOT complex           |
| GO:004858 |                                                       | negative regulation of     |
| 5         | HUMAN HGNC=533 UniProtKB=P04083                       | response to stimulus       |
| GO:002260 | HUMAN HGNC=3602 UniProtKB=Q9UBX5,HUMAN HGNC=15855     | cellular component         |
| 7         | UniProtKB=Q9NPY3                                      | assembly                   |
|           | HUMAN HGNC=2479 UniProtKB=O76096,HUMAN HGNC=9353 U    |                            |
| GO:004532 | niProtKB=P32119,HUMAN HGNC=9352 UniProtKB=Q06830,HUMA |                            |
| 1         | N HGNC=16961 UniProtKB=Q15762                         | leukocyte activation       |
|           |                                                       | regulation of              |
| GO:004366 |                                                       | phosphoprotein             |
| 6         | HUMAN HGNC=1173 UniProtKB=Q5H9R7                      | phosphatase activity       |
| GO:009011 | HUMAN HGNC=10534 UniProtKB=Q9NR31,HUMAN HGNC=10701    | COPII-coated vesicle       |
| 4         | UniProtKB=Q15436                                      | budding                    |
| GO:190249 |                                                       | transmembrane transporter  |
| 5         | HUMAN HGNC=806 UniProtKB=P54709                       | complex                    |
|           | HUMAN HGNC=11179 UniProtKB=P00441,HUMAN HGNC=11138    |                            |
| GO:000550 | UniProtKB=P37840,HUMAN HGNC=21101 UniProtKB=O60888,H  |                            |
| 7         | UMAN HGNC=2689 UniProtKB=P09172                       |                            |
|           | HUMAN HGNC=11873 UniProtKB=Q9NYL9,HUMAN HGNC=12012    |                            |
|           | UniProtKB=P06753,HUMAN HGNC=544 UniProtKB=P08133,HUM  |                            |
| GO:000693 | AN HGNC=12013 UniProtKB=P67936,HUMAN HGNC=12011 UniP  |                            |
| 6         | rotKB=P07951                                          | muscle contraction         |
|           |                                                       | integral component of      |
| GO:003017 | HUMAN HGNC=30550 UniProtKB=O60337,HUMAN HGNC=17943    | endoplasmic reticulum      |
| 6         | UniProtKB=Q9GZP9,HUMAN HGNC=24175 UniProtKB=Q9P035    | membrane                   |
| GO:000388 |                                                       | DNA-directed DNA           |
| 7         | HUMAN HGNC=14060 UniProtKB=Q9UBZ9                     | polymerase activity        |

|            |                                                                                                                                                                                                                                                                                                                                           |                                                           |
|------------|-------------------------------------------------------------------------------------------------------------------------------------------------------------------------------------------------------------------------------------------------------------------------------------------------------------------------------------------|-----------------------------------------------------------|
| GO:0005929 | HUMAN HGNC=14313 UniProtKB=Q8WYAO,HUMAN HGNC=26664 UniProtKB=Q8N841,HUMAN HGNC=11119 UniProtKB=Q99835,HUMAN HGNC=29262 UniProtKB=Q9P2H3                                                                                                                                                                                                   | cilium                                                    |
| GO:0007039 | HUMAN HGNC=11358 UniProtKB=O75886,HUMAN HGNC=11357 UniProtKB=Q92783                                                                                                                                                                                                                                                                       | protein catabolic process in the vacuole                  |
| GO:0006631 | HUMAN HGNC=2328 UniProtKB=P50416                                                                                                                                                                                                                                                                                                          | fatty acid metabolic process                              |
| PC00172    | HUMAN HGNC=9465 UniProtKB=P11908,HUMAN HGNC=7413 UniProtKB=Q13126,HUMAN HGNC=29035 UniProtKB=O43314,HUMAN HGNC=362 UniProtKB=P54819,HUMAN HGNC=363 UniProtKB=P27144,HUMAN HGNC=361 UniProtKB=P00568,HUMAN HGNC=18170 UniProtKB=P30085,HUMAN HGNC=17376 UniProtKB=Q9UIJ7,HUMAN HGNC=7892 UniProtKB=P00491,HUMAN HGNC=9462 UniProtKB=P60891 | nucleotide kinase                                         |
| GO:0036158 | HUMAN HGNC=2952 UniProtKB=Q96JB1                                                                                                                                                                                                                                                                                                          | outer dynein arm assembly anatomical structure            |
| GO:0048646 | HUMAN HGNC=12652 UniProtKB=P50552,HUMAN HGNC=13937 UniProtKB=O95866                                                                                                                                                                                                                                                                       | formation involved in morphogenesis                       |
| GO:0010033 | HUMAN HGNC=253 UniProtKB=P11766,HUMAN HGNC=11820 UniProtKB=P01033,HUMAN HGNC=251 UniProtKB=P00326,HUMAN HGNC=255 UniProtKB=P28332                                                                                                                                                                                                         | response to organic substance                             |
| GO:0050868 | HUMAN HGNC=533 UniProtKB=P04083                                                                                                                                                                                                                                                                                                           | negative regulation of T cell activation                  |
| GO:0070603 | HUMAN HGNC=29989 UniProtKB=Q86YP4                                                                                                                                                                                                                                                                                                         | SWI/SNF superfamily-type complex                          |
| GO:0016597 | HUMAN HGNC=20 UniProtKB=P49588                                                                                                                                                                                                                                                                                                            | amino acid binding                                        |
| GO:0097352 | HUMAN HGNC=6501 UniProtKB=P13473,HUMAN HGNC=12666 UniProtKB=P55072                                                                                                                                                                                                                                                                        | autophagosome maturation                                  |
| GO:0071162 | HUMAN HGNC=26200 UniProtKB=Q9H668                                                                                                                                                                                                                                                                                                         | CMG complex                                               |
| GO:0048016 | HUMAN HGNC=3537 UniProtKB=P25116,HUMAN HGNC=9314 UniProtKB=Q08209,HUMAN HGNC=4472 UniProtKB=Q14330,HUMAN HGNC=4390 UniProtKB=P50148,HUMAN HGNC=3540 UniProtKB=Q96RIO                                                                                                                                                                      | inositol phosphate-mediated signaling                     |
| GO:0010557 | HUMAN HGNC=6517 UniProtKB=P18428                                                                                                                                                                                                                                                                                                          | positive regulation of macromolecule biosynthetic process |
| PC00002    | HUMAN HGNC=14247 UniProtKB=O75964,HUMAN HGNC=837 UniProtKB=P30049,HUMAN HGNC=846 UniProtKB=P56385,HUMAN HGNC=845 UniProtKB=O75947,HUMAN HGNC=851 UniProtKB=P38606,HUMAN HGNC=833 UniProtKB=P36542,HUMAN HGNC=823 UniProtKB=P25705,HUMAN HGNC=830 UniProtKB=P06576,HUMAN HGNC=850 UniProtKB=P48047                                         | ATP synthase                                              |
| GO:0000266 | HUMAN HGNC=21689 UniProtKB=Q9Y3D6,HUMAN HGNC=2973 UniProtKB=O00429,HUMAN HGNC=2974 UniProtKB=P50570,HUMAN HGNC=29125 UniProtKB=Q9UQ16                                                                                                                                                                                                     | mitochondrial fission                                     |
| GO:0090287 | HUMAN HGNC=1692 UniProtKB=P08962                                                                                                                                                                                                                                                                                                          | regulation of cellular response to growth factor stimulus |
| GO:0006165 | HUMAN HGNC=363 UniProtKB=P27144,HUMAN HGNC=361 UniProtKB=P00568                                                                                                                                                                                                                                                                           | nucleoside diphosphate phosphorylation                    |

|            |                                                                                                                                                                                                                                                                                                                                                                                                                                                                                                                                                                                                                                                                                                                                                                                     |                                        |
|------------|-------------------------------------------------------------------------------------------------------------------------------------------------------------------------------------------------------------------------------------------------------------------------------------------------------------------------------------------------------------------------------------------------------------------------------------------------------------------------------------------------------------------------------------------------------------------------------------------------------------------------------------------------------------------------------------------------------------------------------------------------------------------------------------|----------------------------------------|
|            | HUMAN HGNC=253 UniProtKB=P11766,HUMAN HGNC=1062 UniProtKB=P53004,HUMAN HGNC=4141 UniProtKB=P04406,HUMAN HGNC=7863 UniProtKB=Q13423,HUMAN HGNC=5382 UniProtKB=O75874,HUMAN HGNC=6970 UniProtKB=P40925,HUMAN HGNC=4057 UniProtKB=P11413,HUMAN HGNC=4335 UniProtKB=P00367,HUMAN HGNC=6535 UniProtKB=P00338,HUMAN HGNC=8891 UniProtKB=P52209,HUMAN HGNC=18399 UniProtKB=Q8N5I4,HUMAN HGNC=6971 UniProtKB=P40926,HUMAN HGNC=6541 UniProtKB=P07195,HUMAN HGNC=17964 UniProtKB=Q8TC12,HUMAN HGNC=251 UniProtKB=P00326,HUMAN HGNC=4456 UniProtKB=P43304,HUMAN HGNC=18647 UniProtKB=Q8WWV3,HUMAN HGNC=92 UniProtKB=P49748,HUMAN HGNC=7717 UniProtKB=P19404,HUMAN HGNC=5383 UniProtKB=P48735,HUMAN HGNC=255 UniProtKB=P28332,HUMAN HGNC=5386 UniProtKB=P51553,HUMAN HGNC=412 UniProtKB=P49189 | dehydrogenase                          |
| PC00092    | HUMAN HGNC=4635 UniProtKB=P21266,HUMAN HGNC=4553 UniProtKB=P07203,HUMAN HGNC=4634 UniProtKB=P28161,HUMAN HGNC=4312 UniProtKB=P48507,HUMAN HGNC=4632 UniProtKB=P09488,HUMAN HGNC=4623 UniProtKB=P00390,HUMAN HGNC=4638 UniProtKB=P09211                                                                                                                                                                                                                                                                                                                                                                                                                                                                                                                                              | glutathione metabolic process          |
| GO:0006749 | HUMAN HGNC=8533 UniProtKB=P51575,HUMAN HGNC=2153 UniProtKB=Q9NQW8                                                                                                                                                                                                                                                                                                                                                                                                                                                                                                                                                                                                                                                                                                                   | ligand-gated ion channel               |
| PC00141    | HUMAN HGNC=395 UniProtKB=P13716                                                                                                                                                                                                                                                                                                                                                                                                                                                                                                                                                                                                                                                                                                                                                     | dehydratase                            |
| PC00091    | HUMAN HGNC=26555 UniProtKB=Q3SY00,HUMAN HGNC=17060 UniProtKB=Q92845                                                                                                                                                                                                                                                                                                                                                                                                                                                                                                                                                                                                                                                                                                                 | ciliary transition zone                |
| GO:0035869 |                                                                                                                                                                                                                                                                                                                                                                                                                                                                                                                                                                                                                                                                                                                                                                                     |                                        |
| GO:0016592 | HUMAN HGNC=11957 UniProtKB=Q93074                                                                                                                                                                                                                                                                                                                                                                                                                                                                                                                                                                                                                                                                                                                                                   | mediator complex                       |
| GO:0050818 | HUMAN HGNC=11491 UniProtKB=P43405,HUMAN HGNC=3537 UniProtKB=P25116                                                                                                                                                                                                                                                                                                                                                                                                                                                                                                                                                                                                                                                                                                                  | regulation of coagulation              |
| GO:0004864 | HUMAN HGNC=14871 UniProtKB=Q96A00,HUMAN HGNC=14952 UniProtKB=Q8TAE6                                                                                                                                                                                                                                                                                                                                                                                                                                                                                                                                                                                                                                                                                                                 | protein phosphatase inhibitor activity |
| GO:0042734 | HUMAN HGNC=8515 UniProtKB=Q9HC10                                                                                                                                                                                                                                                                                                                                                                                                                                                                                                                                                                                                                                                                                                                                                    | presynaptic membrane                   |
| PC00070    | HUMAN HGNC=6616 UniProtKB=P48059                                                                                                                                                                                                                                                                                                                                                                                                                                                                                                                                                                                                                                                                                                                                                    | cell junction protein                  |
|            | HUMAN HGNC=8876 UniProtKB=P17858,HUMAN Gene=SEP15 UniProtKB=O60613,HUMAN HGNC=11179 UniProtKB=P00441,HUMAN HGNC=4141 UniProtKB=P04406,HUMAN HGNC=7863 UniProtKB=Q13423,HUMAN HGNC=11180 UniProtKB=P04179,HUMAN HGNC=9021 UniProtKB=P14618,HUMAN HGNC=8878 UniProtKB=Q01813,HUMAN HGNC=4456 UniProtKB=P43304,HUMAN HGNC=4335 UniProtKB=P00367,HUMAN HGNC=7717 UniProtKB=P19404,HUMAN HGNC=412 UniProtKB=P49189                                                                                                                                                                                                                                                                                                                                                                       | oxidoreductase activity                |
| GO:0016491 |                                                                                                                                                                                                                                                                                                                                                                                                                                                                                                                                                                                                                                                                                                                                                                                     | negative regulation of                 |
| GO:0051250 | HUMAN HGNC=18233 UniProtKB=Q8NDB2                                                                                                                                                                                                                                                                                                                                                                                                                                                                                                                                                                                                                                                                                                                                                   | lymphocyte activation                  |
|            | HUMAN HGNC=7007 UniProtKB=P61006,HUMAN HGNC=15474 UniProtKB=Q9Y566,HUMAN HGNC=1736 UniProtKB=P60953,HUMAN HGNC=2974 UniProtKB=P50570,HUMAN HGNC=9801 UniProtKB=P63000,HUMAN HGNC=29125 UniProtKB=Q9UQ16,HUMAN HGNC=667 UniProtKB=P61586,HUMAN HGNC=14294 UniProtKB=Q9BYB0                                                                                                                                                                                                                                                                                                                                                                                                                                                                                                           | dendritic spine                        |
| GO:0043197 | HUMAN HGNC=17259 UniProtKB=Q9Y4Z0,HUMAN HGNC=29190 UniProtKB=Q9UPQ9,HUMAN HGNC=20250 UniProtKB=Q96IF1,HUMAN HGNC=9207 UniProtKB=Q9UFF9                                                                                                                                                                                                                                                                                                                                                                                                                                                                                                                                                                                                                                              | P-body                                 |
| GO:0000932 |                                                                                                                                                                                                                                                                                                                                                                                                                                                                                                                                                                                                                                                                                                                                                                                     |                                        |

|           |                                                       |                             |
|-----------|-------------------------------------------------------|-----------------------------|
| GO:001998 |                                                       |                             |
| 5         | HUMAN HGNC=14060 UniProtKB=Q9UBZ9                     | translesion synthesis       |
| GO:005068 |                                                       | regulation of mRNA          |
| 4         | HUMAN HGNC=21605 UniProtKB=Q14151                     | processing                  |
| GO:200078 |                                                       | negative regulation of      |
| 0         | HUMAN HGNC=23077 UniProtKB=Q96FW1                     | double-strand break repair  |
|           | HUMAN HGNC=2479 UniProtKB=O76096,HUMAN HGNC=11491     |                             |
|           | UniProtKB=P43405,HUMAN HGNC=3537 UniProtKB=P25116,HUM |                             |
| GO:000960 | AN HGNC=6383 UniProtKB=P01042,HUMAN HGNC=7967 UniProt | response to external        |
| 5         | KB=Q96RI1,HUMAN HGNC=2300 UniProtKB=Q96IY4            | stimulus                    |
| GO:200011 |                                                       | regulation of cysteine-type |
| 6         | HUMAN HGNC=2479 UniProtKB=O76096                      | endopeptidase activity      |
| GO:004393 | HUMAN HGNC=1869 UniProtKB=P11597,HUMAN HGNC=9093 U    | protein-containing complex  |
| 3         | niProtKB=P55058                                       | subunit organization        |
| GO:001702 |                                                       |                             |
| 5         | HUMAN HGNC=9552 UniProtKB=P62195                      | TBP-class protein binding   |
|           | HUMAN HGNC=15474 UniProtKB=Q9Y566,HUMAN HGNC=544 U    |                             |
|           | niProtKB=P08133,HUMAN HGNC=12601 UniProtKB=O75445,HUM |                             |
| GO:000988 | AN HGNC=7002 UniProtKB=A6NDR6,HUMAN HGNC=885 UniProt  | animal organ                |
| 7         | KB=O75882,HUMAN HGNC=14294 UniProtKB=Q9BYB0           | morphogenesis               |
| GO:001802 | HUMAN HGNC=7133 UniProtKB=O14686,HUMAN HGNC=13726     | histone-lysine N-           |
| 4         | UniProtKB=Q8NEZ4                                      | methyltransferase activity  |
|           | HUMAN HGNC=3338 UniProtKB=Q14247,HUMAN HGNC=12690     |                             |
|           | UniProtKB=P09327,HUMAN HGNC=11148 UniProtKB=Q16658,HU |                             |
|           | MAN HGNC=12733 UniProtKB=Q9Y6W5,HUMAN HGNC=2695 Un    |                             |
|           | iProtKB=Q16643,HUMAN HGNC=7590 UniProtKB=Q15746,HUMA  |                             |
|           | N HGNC=2696 UniProtKB=Q9UJU6,HUMAN HGNC=14653 UniPro  |                             |
| GO:003002 | tKB=Q9HBI1,HUMAN HGNC=4844 UniProtKB=P14317,HUMAN H   |                             |
| 7         | GNC=11320 UniProtKB=Q8IZP0                            | lamellipodium               |
| GO:003033 |                                                       |                             |
| 2         | HUMAN HGNC=24224 UniProtKB=Q9NYV4                     | cyclin binding              |
|           | HUMAN HGNC=5241 UniProtKB=P11142,HUMAN HGNC=5269 U    |                             |
|           | niProtKB=P61604,HUMAN HGNC=5239 UniProtKB=P17066,HUMA |                             |
|           | N HGNC=30594 UniProtKB=Q9H3U1,HUMAN HGNC=5238 UniPro  |                             |
|           | tKB=P11021,HUMAN HGNC=5270 UniProtKB=P25685,HUMAN H   |                             |
| GO:006107 | GNC=5240 UniProtKB=P48741,HUMAN HGNC=11343 UniProtKB= | chaperone-mediated          |
| 7         | P50502                                                | protein folding             |
|           | HUMAN HGNC=9240 UniProtKB=P02775,HUMAN HGNC=19100     |                             |
|           | UniProtKB=Q5VWK5,HUMAN HGNC=11364 UniProtKB=P40763,H  |                             |
| GO:001922 | UMAN HGNC=10632 UniProtKB=P13501,HUMAN HGNC=8862 U    | cytokine-mediated signaling |
| 1         | niProtKB=P10720,HUMAN HGNC=8861 UniProtKB=P02776      | pathway                     |
| GO:001095 |                                                       | positive regulation of      |
| 0         | HUMAN HGNC=9568 UniProtKB=Q06323                      | endopeptidase activity      |
| GO:000658 |                                                       | catecholamine metabolic     |
| 4         | HUMAN HGNC=2689 UniProtKB=P09172                      | process                     |
| GO:004801 |                                                       | phosphatidylinositol-       |
| 5         | HUMAN HGNC=9055 UniProtKB=Q00722                      | mediated signaling          |
| GO:004512 |                                                       | regulation of bone          |
| 4         | HUMAN HGNC=29884 UniProtKB=Q8TF42                     | resorption                  |
| GO:004439 |                                                       | ubiquitin-like protein      |
| 0         | HUMAN HGNC=16476 UniProtKB=Q9H0E2                     | conjugating enzyme binding  |
| GO:003086 | HUMAN HGNC=10252 UniProtKB=O75116,HUMAN HGNC=17905    | cortical actin cytoskeleton |
| 6         | UniProtKB=Q9Y613                                      | organization                |

|            |                                                                                                                                                                                                                                                                                                                                                                                                                      |                                                                              |
|------------|----------------------------------------------------------------------------------------------------------------------------------------------------------------------------------------------------------------------------------------------------------------------------------------------------------------------------------------------------------------------------------------------------------------------|------------------------------------------------------------------------------|
| GO:0071218 | HUMAN HGNC=12666 UniProtKB=P55072,HUMAN HGNC=15663 UniProtKB=Q9NYU2                                                                                                                                                                                                                                                                                                                                                  | cellular response to misfolded protein                                       |
| GO:0017056 | HUMAN HGNC=8062 UniProtKB=P49790,HUMAN HGNC=17859 UniProtKB=Q5SRE5                                                                                                                                                                                                                                                                                                                                                   | structural constituent of nuclear pore                                       |
| GO:0007155 | HUMAN HGNC=8710 UniProtKB=Q9Y5G1,HUMAN HGNC=16051 UniProtKB=Q8TEW0,HUMAN HGNC=1681 UniProtKB=P16070,HUMAN HGNC=2209 UniProtKB=P20908,HUMAN HGNC=14674 UniProtKB=Q96QU1,HUMAN HGNC=2047 UniProtKB=O00501,HUMAN HGNC=11283 UniProtKB=P12931,HUMAN HGNC=11771 UniProtKB=Q15582                                                                                                                                          | cell adhesion                                                                |
| PC00155    | HUMAN HGNC=8728 UniProtKB=P22061,HUMAN HGNC=24550 UniProtKB=Q9H8H3,HUMAN HGNC=12591 UniProtKB=P06132                                                                                                                                                                                                                                                                                                                 | methyltransferase                                                            |
| GO:0060491 | HUMAN HGNC=9621 UniProtKB=Q6IBS0,HUMAN HGNC=25361 UniProtKB=Q8N264,HUMAN HGNC=21295 UniProtKB=Q8TE68                                                                                                                                                                                                                                                                                                                 | regulation of cell projection assembly                                       |
| GO:0030427 | HUMAN HGNC=3338 UniProtKB=Q14247,HUMAN HGNC=2695 UniProtKB=Q16643,HUMAN HGNC=2696 UniProtKB=Q9UJU6,HUMAN HGNC=4844 UniProtKB=P14317                                                                                                                                                                                                                                                                                  | site of polarized growth                                                     |
| GO:0000790 | HUMAN HGNC=11594 UniProtKB=Q96SF7,HUMAN HGNC=14008 UniProtKB=Q9BW11,HUMAN HGNC=17780 UniProtKB=Q562R1,HUMAN HGNC=18411 UniProtKB=Q3KNW1,HUMAN HGNC=14010 UniProtKB=Q8IWI9,HUMAN HGNC=11364 UniProtKB=P40763,HUMAN HGNC=3815 UniProtKB=Q12951,HUMAN HGNC=20508 UniProtKB=Q8IUE6,HUMAN HGNC=11590 UniProtKB=Q16650,HUMAN HGNC=5036 UniProtKB=Q14103,HUMAN HGNC=12879 UniProtKB=P21506,HUMAN HGNC=7002 UniProtKB=A6NDR6 | nuclear chromatin                                                            |
| GO:0008033 | HUMAN HGNC=26022 UniProtKB=Q7LOY3                                                                                                                                                                                                                                                                                                                                                                                    | tRNA processing                                                              |
| GO:0043951 | HUMAN HGNC=237 UniProtKB=O43306                                                                                                                                                                                                                                                                                                                                                                                      | negative regulation of cAMP-mediated signaling                               |
| GO:0017137 | HUMAN HGNC=25694 UniProtKB=Q8TC07,HUMAN HGNC=4226 UniProtKB=P31150,HUMAN HGNC=30512 UniProtKB=Q5JSH3,HUMAN HGNC=4227 UniProtKB=P50395,HUMAN HGNC=25571 UniProtKB=Q9NVG8                                                                                                                                                                                                                                              | Rab GTPase binding                                                           |
| GO:0017022 | HUMAN HGNC=13206 UniProtKB=O60296                                                                                                                                                                                                                                                                                                                                                                                    | myosin binding                                                               |
| GO:0006066 | HUMAN HGNC=253 UniProtKB=P11766,HUMAN HGNC=24552 UniProtKB=Q3LXA3,HUMAN HGNC=12009 UniProtKB=P60174,HUMAN HGNC=251 UniProtKB=P00326,HUMAN HGNC=6050 UniProtKB=P29218,HUMAN HGNC=255 UniProtKB=P28332                                                                                                                                                                                                                 | alcohol metabolic process                                                    |
| GO:0051560 | HUMAN HGNC=23526 UniProtKB=Q8NE86,HUMAN HGNC=544 UniProtKB=P08133                                                                                                                                                                                                                                                                                                                                                    | mitochondrial calcium ion homeostasis                                        |
| GO:0050790 | HUMAN HGNC=9386 UniProtKB=Q9UGJ0                                                                                                                                                                                                                                                                                                                                                                                     | regulation of catalytic activity                                             |
| GO:0000276 | HUMAN HGNC=14247 UniProtKB=O75964,HUMAN HGNC=845 UniProtKB=O75947,HUMAN HGNC=850 UniProtKB=P48047                                                                                                                                                                                                                                                                                                                    | mitochondrial proton-transporting ATP synthase complex, coupling factor F(o) |
| GO:0030182 | HUMAN HGNC=1504 UniProtKB=P42574,HUMAN HGNC=51815 UniProtKB=A0A1W2PPM1                                                                                                                                                                                                                                                                                                                                               | neuron differentiation                                                       |
| GO:0030695 | HUMAN HGNC=4226 UniProtKB=P31150,HUMAN HGNC=679 UniProtKB=P52566,HUMAN HGNC=4227 UniProtKB=P50395,HUMAN HGNC=678 UniProtKB=P52565                                                                                                                                                                                                                                                                                    | GTPase regulator activity                                                    |
| GO:0035251 | HUMAN HGNC=4699 UniProtKB=P46976,HUMAN HGNC=15663 UniProtKB=Q9NYU2                                                                                                                                                                                                                                                                                                                                                   | UDP-glucosyltransferase activity                                             |

|            |                                                                                                                                                                                                                                                                                                                                                                                                                                                                                |                                                         |
|------------|--------------------------------------------------------------------------------------------------------------------------------------------------------------------------------------------------------------------------------------------------------------------------------------------------------------------------------------------------------------------------------------------------------------------------------------------------------------------------------|---------------------------------------------------------|
| GO:0001725 | HUMAN HGNC=2067 UniProtKB=O00151,HUMAN HGNC=7590 UniProtKB=Q15746,HUMAN HGNC=13200 UniProtKB=Q15942,HUMAN HGNC=18142 UniProtKB=Q9Y4D1,HUMAN HGNC=17468 UniProtKB=Q96HC4,HUMAN HGNC=22958 UniProtKB=Q9NR12,HUMAN HGNC=6040 UniProtKB=Q13418                                                                                                                                                                                                                                     | stress fiber                                            |
| GO:0043596 | HUMAN HGNC=26200 UniProtKB=Q9H668                                                                                                                                                                                                                                                                                                                                                                                                                                              | nuclear replication fork                                |
| GO:0044380 | HUMAN HGNC=6891 UniProtKB=Q15555,HUMAN HGNC=6890 UniProtKB=Q15691                                                                                                                                                                                                                                                                                                                                                                                                              | protein localization to cytoskeleton                    |
| GO:0031098 | HUMAN HGNC=11408 UniProtKB=Q13043,HUMAN HGNC=30765 UniProtKB=Q9UKE5                                                                                                                                                                                                                                                                                                                                                                                                            | stress-activated protein kinase signaling cascade       |
| PC00073    | HUMAN HGNC=5269 UniProtKB=P61604,HUMAN HGNC=1623 UniProtKB=P50990,HUMAN HGNC=11655 UniProtKB=P17987,HUMAN HGNC=1617 UniProtKB=P50991,HUMAN HGNC=1622 UniProtKB=Q99832,HUMAN HGNC=1618 UniProtKB=P48643,HUMAN HGNC=1620 UniProtKB=P40227,HUMAN HGNC=32153 UniProtKB=A6NM43,HUMAN HGNC=11579 UniProtKB=O75347,HUMAN HGNC=1615 UniProtKB=P78371                                                                                                                                   | chaperonin                                              |
| GO:0061630 | HUMAN HGNC=463 UniProtKB=Q9UKV5,HUMAN HGNC=27146 UniProtKB=Q5TA31,HUMAN HGNC=16276 UniProtKB=Q9C035,HUMAN HGNC=9261 UniProtKB=Q13356,HUMAN HGNC=14452 UniProtKB=Q9NYG5,HUMAN HGNC=26378 UniProtKB=Q8N7C3,HUMAN HGNC=25544 UniProtKB=Q9HCI7                                                                                                                                                                                                                                     | ubiquitin protein ligase activity                       |
| GO:0033627 | HUMAN HGNC=23151 UniProtKB=Q86UX7,HUMAN HGNC=6156 UniProtKB=P05106,HUMAN HGNC=11491 UniProtKB=P43405,HUMAN HGNC=6153 UniProtKB=P05556                                                                                                                                                                                                                                                                                                                                          | cell adhesion mediated by integrin                      |
| GO:0045732 | HUMAN HGNC=16804 UniProtKB=O00308                                                                                                                                                                                                                                                                                                                                                                                                                                              | positive regulation of protein catabolic process        |
| GO:0006096 | HUMAN HGNC=8876 UniProtKB=P17858,HUMAN HGNC=418 UniProtKB=P09972,HUMAN HGNC=4458 UniProtKB=P06744,HUMAN HGNC=4141 UniProtKB=P04406,HUMAN HGNC=8878 UniProtKB=Q01813,HUMAN HGNC=8898 UniProtKB=P07205,HUMAN HGNC=4922 UniProtKB=P19367,HUMAN HGNC=414 UniProtKB=P04075,HUMAN HGNC=3350 UniProtKB=P06733,HUMAN HGNC=12009 UniProtKB=P60174,HUMAN HGNC=3353 UniProtKB=P09104,HUMAN HGNC=9021 UniProtKB=P14618,HUMAN HGNC=3354 UniProtKB=P13929                                    | glycolytic process                                      |
| GO:0007052 | HUMAN HGNC=2712 UniProtKB=Q13561,HUMAN HGNC=12666 UniProtKB=P55072,HUMAN HGNC=28959 UniProtKB=Q14008,HUMAN HGNC=9308 UniProtKB=Q15257                                                                                                                                                                                                                                                                                                                                          | mitotic spindle organization                            |
| GO:0001505 | HUMAN HGNC=16937 UniProtKB=O75915,HUMAN HGNC=2689 UniProtKB=P09172                                                                                                                                                                                                                                                                                                                                                                                                             | regulation of neurotransmitter levels                   |
| PC00033    | HUMAN HGNC=26022 UniProtKB=Q7LOY3,HUMAN HGNC=17136 UniProtKB=Q8IY81                                                                                                                                                                                                                                                                                                                                                                                                            | RNA methyltransferase                                   |
| GO:0016684 | HUMAN HGNC=17169 UniProtKB=Q13162,HUMAN HGNC=4555 UniProtKB=P22352,HUMAN HGNC=7218 UniProtKB=P05164,HUMAN HGNC=9355 UniProtKB=P30044,HUMAN HGNC=4553 UniProtKB=P07203,HUMAN HGNC=4823 UniProtKB=P69905,HUMAN HGNC=4829 UniProtKB=P02042,HUMAN HGNC=9352 UniProtKB=Q06830,HUMAN HGNC=4827 UniProtKB=P68871,HUMAN HGNC=3423 UniProtKB=P11678,HUMAN HGNC=9353 UniProtKB=P32119,HUMAN HGNC=4831 UniProtKB=P69891,HUMAN HGNC=1516 UniProtKB=P04040,HUMAN HGNC=9354 UniProtKB=P30048 | oxidoreductase activity, acting on peroxide as acceptor |

|            |                                                                                                                                                                                                                                                                                                                                                                                                                                                                                                                                                                                                                                                                                                                                                                                                                                                                                                                                                                                                                                                                                                                                                                                                                                                                                                                                                                                                                                                                                                                                                                                                                 |                                                              |
|------------|-----------------------------------------------------------------------------------------------------------------------------------------------------------------------------------------------------------------------------------------------------------------------------------------------------------------------------------------------------------------------------------------------------------------------------------------------------------------------------------------------------------------------------------------------------------------------------------------------------------------------------------------------------------------------------------------------------------------------------------------------------------------------------------------------------------------------------------------------------------------------------------------------------------------------------------------------------------------------------------------------------------------------------------------------------------------------------------------------------------------------------------------------------------------------------------------------------------------------------------------------------------------------------------------------------------------------------------------------------------------------------------------------------------------------------------------------------------------------------------------------------------------------------------------------------------------------------------------------------------------|--------------------------------------------------------------|
|            | HUMAN HGNC=11957 UniProtKB=Q93074,HUMAN HGNC=25473 UniProtKB=Q9P2N6,HUMAN HGNC=7670 UniProtKB=Q9Y6Q9,HUMAN HGNC=7133 UniProtKB=O14686,HUMAN HGNC=23708 UniProtKB=Q6ZR52,HUMAN HGNC=15935 UniProtKB=Q9H4I2,HUMAN HGNC=29084 UniProtKB=O75123,HUMAN HGNC=26427 UniProtKB=Q96ND8,HUMAN HGNC=9866 UniProtKB=P13631,HUMAN HGNC=51815 UniProtKB=A0A1W2PPM1,HUMAN HGNC=3815 UniProtKB=Q12951,HUMAN HGNC=11590 UniProtKB=Q16650,HUMAN HGNC=14451 UniProtKB=Q9BQK8,HUMAN HGNC=5048 UniProtKB=Q00839,HUMAN HGNC=12879 UniProtKB=P21506,HUMAN HGNC=16272 UniProtKB=Q96JK9,HUMAN HGNC=7910 UniProtKB=P06748,HUMAN HGNC=10475 UniProtKB=Q9Y230,HUMAN HGNC=7002 UniProtKB=A6NDR6,HUMAN HGNC=33108 UniProtKB=Q6NX45,HUMAN HGNC=14008 UniProtKB=Q9BW11,HUMAN HGNC=13061 UniProtKB=Q14587,HUMAN HGNC=14010 UniProtKB=Q8IWI9,HUMAN HGNC=11364 UniProtKB=P40763,HUMAN HGNC=21605 UniProtKB=Q14151,HUMAN HGNC=6702 UniProtKB=Q32MZ4,HUMAN HGNC=10474 UniProtKB=Q9Y265,HUMAN HGNC=18807 UniProtKB=O94983,HUMAN HGNC=13726 UniProtKB=Q8NEZ4,HUMAN HGNC=16804 UniProtKB=O00308,HUMAN HGNC=17801 UniProtKB=Q8NHV6,HUMAN HGNC=11594 UniProtKB=Q96SF7,HUMAN HGNC=31797 UniProtKB=P0C7V6,HUMAN HGNC=30025 UniProtKB=Q5VV67,HUMAN HGNC=9459 UniProtKB=Q92786,HUMAN HGNC=6767 UniProtKB=Q15797,HUMAN HGNC=13109 UniProtKB=P17038,HUMAN HGNC=29989 UniProtKB=Q86YP4,HUMAN HGNC=23688 UniProtKB=Q86UU0,HUMAN HGNC=9885 UniProtKB=P29374,HUMAN HGNC=6207 UniProtKB=P14923,HUMAN HGNC=7967 UniProtKB=Q96RI1,HUMAN HGNC=8647 UniProtKB=Q15365,HUMAN HGNC=7547 UniProtKB=P10243,HUMAN HGNC=5044 UniProtKB=P61978,HUMAN HGNC=10055 UniProtKB=Q8N5U6 |                                                              |
| GO:0006366 | HUMAN HGNC=607 UniProtKB=P02654,HUMAN HGNC=871 UniProtKB=Q9UII2,HUMAN HGNC=533 UniProtKB=P04083                                                                                                                                                                                                                                                                                                                                                                                                                                                                                                                                                                                                                                                                                                                                                                                                                                                                                                                                                                                                                                                                                                                                                                                                                                                                                                                                                                                                                                                                                                                 | transcription by RNA polymerase II                           |
| GO:0051346 |                                                                                                                                                                                                                                                                                                                                                                                                                                                                                                                                                                                                                                                                                                                                                                                                                                                                                                                                                                                                                                                                                                                                                                                                                                                                                                                                                                                                                                                                                                                                                                                                                 | negative regulation of hydrolase activity                    |
|            |                                                                                                                                                                                                                                                                                                                                                                                                                                                                                                                                                                                                                                                                                                                                                                                                                                                                                                                                                                                                                                                                                                                                                                                                                                                                                                                                                                                                                                                                                                                                                                                                                 | positive regulation of cysteine-type endopeptidase activity  |
|            |                                                                                                                                                                                                                                                                                                                                                                                                                                                                                                                                                                                                                                                                                                                                                                                                                                                                                                                                                                                                                                                                                                                                                                                                                                                                                                                                                                                                                                                                                                                                                                                                                 | involved in apoptotic process                                |
| GO:0043280 | HUMAN HGNC=19388 UniProtKB=P49593,HUMAN HGNC=19986 UniProtKB=P99999                                                                                                                                                                                                                                                                                                                                                                                                                                                                                                                                                                                                                                                                                                                                                                                                                                                                                                                                                                                                                                                                                                                                                                                                                                                                                                                                                                                                                                                                                                                                             | oxidoreductase activity, acting on the CH-CH group of donors |
| GO:0016627 | HUMAN HGNC=121 UniProtKB=O15254,HUMAN HGNC=119 UniProtKB=Q15067                                                                                                                                                                                                                                                                                                                                                                                                                                                                                                                                                                                                                                                                                                                                                                                                                                                                                                                                                                                                                                                                                                                                                                                                                                                                                                                                                                                                                                                                                                                                                 | ubiquitin-like modifier activating enzyme activity           |
| GO:0008641 | HUMAN HGNC=12469 UniProtKB=P22314                                                                                                                                                                                                                                                                                                                                                                                                                                                                                                                                                                                                                                                                                                                                                                                                                                                                                                                                                                                                                                                                                                                                                                                                                                                                                                                                                                                                                                                                                                                                                                               | amino acid transporter                                       |
| PC00046    | HUMAN HGNC=16937 UniProtKB=O75915                                                                                                                                                                                                                                                                                                                                                                                                                                                                                                                                                                                                                                                                                                                                                                                                                                                                                                                                                                                                                                                                                                                                                                                                                                                                                                                                                                                                                                                                                                                                                                               | cellular response to starvation                              |
| GO:0009267 | HUMAN HGNC=6501 UniProtKB=P13473,HUMAN HGNC=9386 UniProtKB=Q9UGJ0                                                                                                                                                                                                                                                                                                                                                                                                                                                                                                                                                                                                                                                                                                                                                                                                                                                                                                                                                                                                                                                                                                                                                                                                                                                                                                                                                                                                                                                                                                                                               |                                                              |
| GO:0009056 | HUMAN HGNC=5171 UniProtKB=P02790,HUMAN HGNC=7176 UniProtKB=P14780                                                                                                                                                                                                                                                                                                                                                                                                                                                                                                                                                                                                                                                                                                                                                                                                                                                                                                                                                                                                                                                                                                                                                                                                                                                                                                                                                                                                                                                                                                                                               | catabolic process                                            |
|            | HUMAN HGNC=2479 UniProtKB=O76096,HUMAN HGNC=15474 UniProtKB=Q9Y566,HUMAN HGNC=2905 UniProtKB=O14490,HUMAN HGNC=14294 UniProtKB=Q9BYB0                                                                                                                                                                                                                                                                                                                                                                                                                                                                                                                                                                                                                                                                                                                                                                                                                                                                                                                                                                                                                                                                                                                                                                                                                                                                                                                                                                                                                                                                           | regulation of system process                                 |
| GO:0044057 |                                                                                                                                                                                                                                                                                                                                                                                                                                                                                                                                                                                                                                                                                                                                                                                                                                                                                                                                                                                                                                                                                                                                                                                                                                                                                                                                                                                                                                                                                                                                                                                                                 | negative regulation of blood coagulation                     |
| GO:0030195 | HUMAN HGNC=6383 UniProtKB=P01042,HUMAN HGNC=2300 UniProtKB=Q96IY4                                                                                                                                                                                                                                                                                                                                                                                                                                                                                                                                                                                                                                                                                                                                                                                                                                                                                                                                                                                                                                                                                                                                                                                                                                                                                                                                                                                                                                                                                                                                               |                                                              |

|            |                                                                                                                                                                                                                                                                                                                                                                                                                                                                                                                                                                                                                                                                                                                                                                                                                                                                                                                                                                                                                                                                                                                                                                                                                                                     |                                                |
|------------|-----------------------------------------------------------------------------------------------------------------------------------------------------------------------------------------------------------------------------------------------------------------------------------------------------------------------------------------------------------------------------------------------------------------------------------------------------------------------------------------------------------------------------------------------------------------------------------------------------------------------------------------------------------------------------------------------------------------------------------------------------------------------------------------------------------------------------------------------------------------------------------------------------------------------------------------------------------------------------------------------------------------------------------------------------------------------------------------------------------------------------------------------------------------------------------------------------------------------------------------------------|------------------------------------------------|
| GO:0043235 | HUMAN HGNC=1681 UniProtKB=P16070,HUMAN HGNC=6156 UniProtKB=P05106,HUMAN HGNC=4243 UniProtKB=P56159,HUMAN HGNC=19100 UniProtKB=Q5VWK5,HUMAN HGNC=6153 UniProtKB=P05556,HUMAN HGNC=19296 UniProtKB=Q9UF33,HUMAN HGNC=1628 UniProtKB=P08571,HUMAN HGNC=4244 UniProtKB=O00451,HUMAN HGNC=6091 UniProtKB=P06213                                                                                                                                                                                                                                                                                                                                                                                                                                                                                                                                                                                                                                                                                                                                                                                                                                                                                                                                          | receptor complex                               |
| GO:0001947 | HUMAN HGNC=14010 UniProtKB=Q8IWI9,HUMAN HGNC=11590 UniProtKB=Q16650                                                                                                                                                                                                                                                                                                                                                                                                                                                                                                                                                                                                                                                                                                                                                                                                                                                                                                                                                                                                                                                                                                                                                                                 | heart looping                                  |
| GO:0007163 | HUMAN HGNC=18756 UniProtKB=Q9BYZ6,HUMAN HGNC=9802 UniProtKB=P15153,HUMAN HGNC=11148 UniProtKB=Q16658,HUMAN HGNC=29327 UniProtKB=Q5VZ46,HUMAN HGNC=9801 UniProtKB=P63000,HUMAN HGNC=28959 UniProtKB=Q14008,HUMAN HGNC=14653 UniProtKB=Q9HBI1                                                                                                                                                                                                                                                                                                                                                                                                                                                                                                                                                                                                                                                                                                                                                                                                                                                                                                                                                                                                         | establishment or maintenance of cell polarity  |
| PC00079    | HUMAN HGNC=24552 UniProtKB=Q3LXA3                                                                                                                                                                                                                                                                                                                                                                                                                                                                                                                                                                                                                                                                                                                                                                                                                                                                                                                                                                                                                                                                                                                                                                                                                   | cyclase                                        |
| PC00150    | HUMAN HGNC=7642 UniProtKB=Q99747,HUMAN HGNC=28984 UniProtKB=Q12768,HUMAN HGNC=555 UniProtKB=O43747,HUMAN HGNC=13487 UniProtKB=Q96QK1,HUMAN HGNC=8766 UniProtKB=Q8WUM4,HUMAN HGNC=37094 UniProtKB=P0CG39,HUMAN HGNC=6752 UniProtKB=P20645,HUMAN HGNC=8016 UniProtKB=P46459,HUMAN HGNC=30904 UniProtKB=O60763,HUMAN HGNC=2973 UniProtKB=O00429,HUMAN HGNC=18451 UniProtKB=Q8NI22,HUMAN HGNC=13667 UniProtKB=Q9BXS5,HUMAN HGNC=3419 UniProtKB=P42566,HUMAN HGNC=561 UniProtKB=O95782,HUMAN HGNC=9087 UniProtKB=Q04941,HUMAN HGNC=554 UniProtKB=Q10567,HUMAN HGNC=16695 UniProtKB=P51572,HUMAN HGNC=13206 UniProtKB=O60296,HUMAN HGNC=20120 UniProtKB=Q17RC7,HUMAN HGNC=7641 UniProtKB=P54920,HUMAN HGNC=570 UniProtKB=P53677,HUMAN HGNC=2974 UniProtKB=P50570,HUMAN HGNC=20954 UniProtKB=Q9NP79,HUMAN HGNC=24634 UniProtKB=Q9UBC2,HUMAN HGNC=17643 UniProtKB=Q9HD26,HUMAN HGNC=23594 UniProtKB=Q709C8,HUMAN HGNC=15578 UniProtKB=Q96D71,HUMAN HGNC=10690 UniProtKB=O95810,HUMAN HGNC=16820 UniProtKB=Q14162,HUMAN HGNC=3244 UniProtKB=Q9NZN3,HUMAN HGNC=33895 UniProtKB=Q6S8J3,HUMAN HGNC=19176 UniProtKB=Q96DZ9,HUMAN HGNC=29125 UniProtKB=Q9UQ16,HUMAN HGNC=6631 UniProtKB=P49257,HUMAN HGNC=30389 UniProtKB=Q96A65,HUMAN HGNC=1908 UniProtKB=Q96RL7 | membrane traffic protein                       |
| GO:0035239 | HUMAN HGNC=12652 UniProtKB=P50552                                                                                                                                                                                                                                                                                                                                                                                                                                                                                                                                                                                                                                                                                                                                                                                                                                                                                                                                                                                                                                                                                                                                                                                                                   | tube morphogenesis                             |
| GO:0010811 | HUMAN HGNC=6616 UniProtKB=P48059                                                                                                                                                                                                                                                                                                                                                                                                                                                                                                                                                                                                                                                                                                                                                                                                                                                                                                                                                                                                                                                                                                                                                                                                                    | positive regulation of cell-substrate adhesion |
| PC00110    | HUMAN HGNC=5164 UniProtKB=Q9Y251,HUMAN HGNC=15527 UniProtKB=Q86Z14                                                                                                                                                                                                                                                                                                                                                                                                                                                                                                                                                                                                                                                                                                                                                                                                                                                                                                                                                                                                                                                                                                                                                                                  | glycosidase                                    |
| PC00261    | HUMAN HGNC=7670 UniProtKB=Q9Y6Q9,HUMAN HGNC=18039 UniProtKB=Q9UGL1                                                                                                                                                                                                                                                                                                                                                                                                                                                                                                                                                                                                                                                                                                                                                                                                                                                                                                                                                                                                                                                                                                                                                                                  | histone modifying enzyme                       |
| PC00212    | HUMAN HGNC=17213 UniProtKB=Q9BWP8                                                                                                                                                                                                                                                                                                                                                                                                                                                                                                                                                                                                                                                                                                                                                                                                                                                                                                                                                                                                                                                                                                                                                                                                                   | surfactant                                     |
| GO:0003697 | HUMAN HGNC=8648 UniProtKB=Q15366,HUMAN HGNC=8647 UniProtKB=Q15365,HUMAN HGNC=11317 UniProtKB=Q04837                                                                                                                                                                                                                                                                                                                                                                                                                                                                                                                                                                                                                                                                                                                                                                                                                                                                                                                                                                                                                                                                                                                                                 | single-stranded DNA binding                    |
| GO:0044087 | HUMAN HGNC=5048 UniProtKB=Q00839                                                                                                                                                                                                                                                                                                                                                                                                                                                                                                                                                                                                                                                                                                                                                                                                                                                                                                                                                                                                                                                                                                                                                                                                                    | regulation of cellular component biogenesis    |

|            |                                                                                                                                                                                                                                                                                                                                                                                                                                                                                                                                                                                                                                                                                                                                                                         |                                                    |
|------------|-------------------------------------------------------------------------------------------------------------------------------------------------------------------------------------------------------------------------------------------------------------------------------------------------------------------------------------------------------------------------------------------------------------------------------------------------------------------------------------------------------------------------------------------------------------------------------------------------------------------------------------------------------------------------------------------------------------------------------------------------------------------------|----------------------------------------------------|
| GO:0006914 | HUMAN HGNC=18423 UniProtKB=O75140,HUMAN HGNC=16276 UniProtKB=Q9C035,HUMAN HGNC=19692 UniProtKB=Q96F24,HUMAN HGNC=1908 UniProtKB=Q96RL7                                                                                                                                                                                                                                                                                                                                                                                                                                                                                                                                                                                                                                  | autophagy                                          |
| GO:0032147 | HUMAN HGNC=11408 UniProtKB=Q13043,HUMAN HGNC=30765 UniProtKB=Q9UKE5,HUMAN HGNC=28164 UniProtKB=Q96M27,HUMAN HGNC=1090 UniProtKB=Q03001,HUMAN HGNC=6325 UniProtKB=O60282,HUMAN HGNC=6891 UniProtKB=Q15555,HUMAN HGNC=2973 UniProtKB=O00429,HUMAN HGNC=6890 UniProtKB=Q15691,HUMAN HGNC=2974 UniProtKB=P50570,HUMAN HGNC=6317 UniProtKB=O43896,HUMAN HGNC=28959 UniProtKB=Q14008,HUMAN HGNC=29125 UniProtKB=Q9UQ16,HUMAN HGNC=6835 UniProtKB=P78559                                                                                                                                                                                                                                                                                                                       | activation of protein kinase activity              |
| GO:0008017 |                                                                                                                                                                                                                                                                                                                                                                                                                                                                                                                                                                                                                                                                                                                                                                         | microtubule binding                                |
| GO:0006403 | HUMAN HGNC=5048 UniProtKB=Q00839                                                                                                                                                                                                                                                                                                                                                                                                                                                                                                                                                                                                                                                                                                                                        | RNA localization                                   |
| GO:0008276 | HUMAN HGNC=8728 UniProtKB=P22061                                                                                                                                                                                                                                                                                                                                                                                                                                                                                                                                                                                                                                                                                                                                        | protein methyltransferase activity                 |
| GO:0005687 | HUMAN HGNC=20471 UniProtKB=O95777                                                                                                                                                                                                                                                                                                                                                                                                                                                                                                                                                                                                                                                                                                                                       | U4 snRNP                                           |
| GO:0014032 | HUMAN HGNC=544 UniProtKB=P08133,HUMAN HGNC=2254 UniProtKB=Q9ULV4                                                                                                                                                                                                                                                                                                                                                                                                                                                                                                                                                                                                                                                                                                        | neural crest cell development                      |
| PC00234    | HUMAN HGNC=20589 UniProtKB=Q9P0J7,HUMAN HGNC=12488 UniProtKB=P68036,HUMAN HGNC=12491 UniProtKB=P61081,HUMAN HGNC=12469 UniProtKB=P22314,HUMAN HGNC=30688 UniProtKB=Q86VP6,HUMAN HGNC=30550 UniProtKB=O60337,HUMAN HGNC=12476 UniProtKB=P61077,HUMAN HGNC=2552 UniProtKB=Q13617,HUMAN HGNC=12475 UniProtKB=P62837,HUMAN HGNC=16804 UniProtKB=O00308,HUMAN HGNC=463 UniProtKB=Q9UKV5,HUMAN HGNC=27146 UniProtKB=Q5TA31,HUMAN HGNC=12492 UniProtKB=P61088,HUMAN HGNC=20296 UniProtKB=Q9Y2H6,HUMAN HGNC=30866 UniProtKB=Q8IX04,HUMAN HGNC=16276 UniProtKB=Q9C035,HUMAN HGNC=10899 UniProtKB=P63208,HUMAN HGNC=14452 UniProtKB=Q9NYG5,HUMAN HGNC=2551 UniProtKB=Q13616,HUMAN HGNC=26378 UniProtKB=Q8N7C3,HUMAN HGNC=12494 UniProtKB=Q13404,HUMAN HGNC=17598 UniProtKB=Q9Y385 | ubiquitin-protein ligase                           |
| GO:0051283 | HUMAN HGNC=544 UniProtKB=P08133                                                                                                                                                                                                                                                                                                                                                                                                                                                                                                                                                                                                                                                                                                                                         | negative regulation of sequestering of calcium ion |
| GO:0034329 | HUMAN HGNC=3757 UniProtKB=O75955,HUMAN HGNC=10252 UniProtKB=O75116                                                                                                                                                                                                                                                                                                                                                                                                                                                                                                                                                                                                                                                                                                      | cell junction assembly                             |
| GO:0008156 | HUMAN HGNC=7326 UniProtKB=P20585                                                                                                                                                                                                                                                                                                                                                                                                                                                                                                                                                                                                                                                                                                                                        | negative regulation of DNA replication             |
| GO:0022604 | HUMAN HGNC=12690 UniProtKB=P09327                                                                                                                                                                                                                                                                                                                                                                                                                                                                                                                                                                                                                                                                                                                                       | regulation of cell morphogenesis                   |
| GO:0061024 | HUMAN HGNC=25541 UniProtKB=P57088,HUMAN HGNC=12649 UniProtKB=O95292,HUMAN HGNC=12648 UniProtKB=Q9P0L0                                                                                                                                                                                                                                                                                                                                                                                                                                                                                                                                                                                                                                                                   | membrane organization                              |
| GO:0008242 | HUMAN HGNC=4248 UniProtKB=Q92820                                                                                                                                                                                                                                                                                                                                                                                                                                                                                                                                                                                                                                                                                                                                        | omega peptidase activity                           |
| GO:0048666 | HUMAN HGNC=29943 UniProtKB=Q9NT68                                                                                                                                                                                                                                                                                                                                                                                                                                                                                                                                                                                                                                                                                                                                       | neuron development                                 |
| GO:0010467 | HUMAN HGNC=8648 UniProtKB=Q15366,HUMAN HGNC=10898 UniProtKB=Q15477,HUMAN HGNC=17150 UniProtKB=Q9Y2V2,HUMAN HGNC=6871 UniProtKB=P28482,HUMAN HGNC=29190 UniProtKB=Q9UPQ9,HUMAN HGNC=5036 UniProtKB=Q14103,HUMAN HGNC=12648 UniProtKB=Q9P0L0                                                                                                                                                                                                                                                                                                                                                                                                                                                                                                                              | gene expression                                    |

|           |                                                                                                                                                                                                                                                                                                                                                                                                                                                                                                                                                           |                                                      |
|-----------|-----------------------------------------------------------------------------------------------------------------------------------------------------------------------------------------------------------------------------------------------------------------------------------------------------------------------------------------------------------------------------------------------------------------------------------------------------------------------------------------------------------------------------------------------------------|------------------------------------------------------|
|           | N   HGNC=6876   UniProtKB=Q16539, HUMAN   HGNC=17196   UniProtKB=Q8NG08, HUMAN   HGNC=13506   UniProtKB=Q8TBJ5                                                                                                                                                                                                                                                                                                                                                                                                                                            |                                                      |
| GO:003336 |                                                                                                                                                                                                                                                                                                                                                                                                                                                                                                                                                           | protein localization to organelle                    |
| 5         | HUMAN   HGNC=23432   UniProtKB=Q9NXG0                                                                                                                                                                                                                                                                                                                                                                                                                                                                                                                     |                                                      |
|           | HUMAN   HGNC=26068   UniProtKB=Q6IAA8, HUMAN   HGNC=8761   UniProtKB=Q9BUL8, HUMAN   HGNC=11408   UniProtKB=Q13043, HUMAN   HGNC=6766   UniProtKB=Q8WVG6, HUMAN   HGNC=30765   UniProtKB=Q9UKE5, HUMAN   HGNC=9673   UniProtKB=Q12913, HUMAN   HGNC=6840   UniProtKB=Q02750, HUMAN   HGNC=6091   UniProtKB=P06213, HUMAN   HGNC=8630   UniProtKB=P30086                                                                                                                                                                                                   | MAPK cascade                                         |
| GO:000016 |                                                                                                                                                                                                                                                                                                                                                                                                                                                                                                                                                           | protein-containing complex                           |
| 5         |                                                                                                                                                                                                                                                                                                                                                                                                                                                                                                                                                           | disassembly                                          |
| GO:003298 |                                                                                                                                                                                                                                                                                                                                                                                                                                                                                                                                                           | disulfide oxidoreductase activity                    |
| 4         | HUMAN   HGNC=607   UniProtKB=P02654                                                                                                                                                                                                                                                                                                                                                                                                                                                                                                                       |                                                      |
| GO:001503 | HUMAN   HGNC=4623   UniProtKB=P00390, HUMAN   HGNC=13312   UniProtKB=P78417                                                                                                                                                                                                                                                                                                                                                                                                                                                                               |                                                      |
| 6         |                                                                                                                                                                                                                                                                                                                                                                                                                                                                                                                                                           |                                                      |
| GO:003439 |                                                                                                                                                                                                                                                                                                                                                                                                                                                                                                                                                           | nuclear periphery                                    |
| 9         | HUMAN   HGNC=5048   UniProtKB=Q00839                                                                                                                                                                                                                                                                                                                                                                                                                                                                                                                      |                                                      |
|           | HUMAN   HGNC=10372   UniProtKB=P05386, HUMAN   HGNC=9391   UniProtKB=P13861, HUMAN   HGNC=18756   UniProtKB=Q9BYZ6, HUMAN   HGNC=1742   UniProtKB=P50851, HUMAN   HGNC=8761   UniProtKB=Q9BUL8, HUMAN   HGNC=9801   UniProtKB=P63000, HUMAN   HGNC=9392   UniProtKB=P31323, HUMAN   HGNC=17780   UniProtKB=Q562R1, HUMAN   HGNC=10690   UniProtKB=O95810, HUMAN   HGNC=9802   UniProtKB=P15153, HUMAN   HGNC=29327   UniProtKB=Q5VZ46, HUMAN   HGNC=20292   UniProtKB=Q9Y376, HUMAN   HGNC=16276   UniProtKB=Q9C035, HUMAN   HGNC=9386   UniProtKB=Q9UGJO |                                                      |
| GO:001990 |                                                                                                                                                                                                                                                                                                                                                                                                                                                                                                                                                           | protein kinase binding                               |
| 1         | HUMAN   HGNC=4827   UniProtKB=P68871, HUMAN   HGNC=4831   UniProtKB=P69891, HUMAN   HGNC=1516   UniProtKB=P04040, HUMAN   HGNC=4823   UniProtKB=P69905, HUMAN   HGNC=4829   UniProtKB=P02042                                                                                                                                                                                                                                                                                                                                                              |                                                      |
| GO:002003 |                                                                                                                                                                                                                                                                                                                                                                                                                                                                                                                                                           | heme binding                                         |
| 7         | HUMAN   HGNC=8761   UniProtKB=Q9BUL8, HUMAN   HGNC=15912   UniProtKB=Q9UNZ2, HUMAN   HGNC=21354   UniProtKB=Q86XR7, HUMAN   HGNC=24251   UniProtKB=Q9Y3A6, HUMAN   HGNC=6631   UniProtKB=P49257, HUMAN   HGNC=16998   UniProtKB=P49755, HUMAN   HGNC=16996   UniProtKB=Q15363, HUMAN   HGNC=24878   UniProtKB=Q9BVK6                                                                                                                                                                                                                                      |                                                      |
| GO:000703 |                                                                                                                                                                                                                                                                                                                                                                                                                                                                                                                                                           | Golgi organization                                   |
| 0         | HUMAN   HGNC=6111   UniProtKB=Q13576, HUMAN   HGNC=679   UniProtKB=P52566, HUMAN   HGNC=21295   UniProtKB=Q8TE68, HUMAN   HGNC=678   UniProtKB=P52565                                                                                                                                                                                                                                                                                                                                                                                                     |                                                      |
| GO:004836 |                                                                                                                                                                                                                                                                                                                                                                                                                                                                                                                                                           | Rac GTPase binding                                   |
| 5         |                                                                                                                                                                                                                                                                                                                                                                                                                                                                                                                                                           | calcium activated cation channel activity            |
| GO:000522 |                                                                                                                                                                                                                                                                                                                                                                                                                                                                                                                                                           | alternative mRNA splicing, via spliceosome           |
| 7         | HUMAN   HGNC=23787   UniProtKB=Q9P1W3                                                                                                                                                                                                                                                                                                                                                                                                                                                                                                                     |                                                      |
| GO:000038 |                                                                                                                                                                                                                                                                                                                                                                                                                                                                                                                                                           | regulation of mitotic sister chromatid segregation   |
| 0         | HUMAN   HGNC=5046   UniProtKB=P52272, HUMAN   HGNC=5048   UniProtKB=Q00839                                                                                                                                                                                                                                                                                                                                                                                                                                                                                |                                                      |
| GO:003304 |                                                                                                                                                                                                                                                                                                                                                                                                                                                                                                                                                           |                                                      |
| 7         | HUMAN   HGNC=5048   UniProtKB=Q00839                                                                                                                                                                                                                                                                                                                                                                                                                                                                                                                      |                                                      |
| GO:004288 |                                                                                                                                                                                                                                                                                                                                                                                                                                                                                                                                                           | amide transport                                      |
| 6         | HUMAN   HGNC=9093   UniProtKB=P55058                                                                                                                                                                                                                                                                                                                                                                                                                                                                                                                      |                                                      |
| GO:003541 |                                                                                                                                                                                                                                                                                                                                                                                                                                                                                                                                                           | protein localization to synapse                      |
| 8         | HUMAN   HGNC=1117   UniProtKB=Q9UPA5, HUMAN   HGNC=13406   UniProtKB=Q9Y6V0                                                                                                                                                                                                                                                                                                                                                                                                                                                                               |                                                      |
| GO:000008 |                                                                                                                                                                                                                                                                                                                                                                                                                                                                                                                                                           | G1/S transition of mitotic cell cycle                |
| 2         | HUMAN   HGNC=20063   UniProtKB=Q86T82, HUMAN   HGNC=533   UniProtKB=P04083, HUMAN   HGNC=9568   UniProtKB=Q06323                                                                                                                                                                                                                                                                                                                                                                                                                                          |                                                      |
| GO:003083 |                                                                                                                                                                                                                                                                                                                                                                                                                                                                                                                                                           | positive regulation of actin filament polymerization |
| 8         | HUMAN   HGNC=12652   UniProtKB=P50552                                                                                                                                                                                                                                                                                                                                                                                                                                                                                                                     |                                                      |

|            |                                                                                                                                                                                                                                                                                                                                            |                                                                                                       |
|------------|--------------------------------------------------------------------------------------------------------------------------------------------------------------------------------------------------------------------------------------------------------------------------------------------------------------------------------------------|-------------------------------------------------------------------------------------------------------|
| GO:0030169 | HUMAN HGNC=2367 UniProtKB=P02741,HUMAN HGNC=584 UniProtKB=P02743                                                                                                                                                                                                                                                                           | low-density lipoprotein particle binding                                                              |
| GO:0045047 | HUMAN HGNC=26212 UniProtKB=P61009                                                                                                                                                                                                                                                                                                          | protein targeting to ER                                                                               |
| GO:0045761 | HUMAN HGNC=4395 UniProtKB=P19086,HUMAN HGNC=20040 UniProtKB=Q01518,HUMAN HGNC=4384 UniProtKB=P63096,HUMAN HGNC=10608 UniProtKB=P47872,HUMAN HGNC=4381 UniProtKB=Q14344,HUMAN HGNC=4387 UniProtKB=P08754,HUMAN HGNC=4385 UniProtKB=P04899,HUMAN HGNC=4393 UniProtKB=P11488,HUMAN HGNC=4390 UniProtKB=P50148,HUMAN HGNC=237 UniProtKB=O43306 | regulation of adenylate cyclase activity                                                              |
| GO:0051345 | HUMAN HGNC=15476 UniProtKB=P63167,HUMAN HGNC=7326 UniProtKB=P20585,HUMAN HGNC=11317 UniProtKB=Q04837                                                                                                                                                                                                                                       | positive regulation of hydrolase activity<br>chondroitin sulfate<br>proteoglycan biosynthetic process |
| GO:0050650 | HUMAN HGNC=24293 UniProtKB=Q70JA7                                                                                                                                                                                                                                                                                                          |                                                                                                       |
| GO:0009152 | HUMAN HGNC=626 UniProtKB=P07741,HUMAN HGNC=794 UniProtKB=P31939,HUMAN HGNC=5157 UniProtKB=P00492,HUMAN HGNC=469 UniProtKB=Q01433,HUMAN HGNC=291 UniProtKB=P30566,HUMAN HGNC=237 UniProtKB=O43306                                                                                                                                           | purine ribonucleotide biosynthetic process                                                            |
| GO:0045182 | HUMAN HGNC=3189 UniProtKB=P68104,HUMAN HGNC=3300 UniProtKB=P63241,HUMAN HGNC=3214 UniProtKB=P13639,HUMAN HGNC=4622 UniProtKB=Q8IYD1,HUMAN HGNC=1243 UniProtKB=Q07021,HUMAN HGNC=4621 UniProtKB=P15170,HUMAN HGNC=3200 UniProtKB=Q5VTE0,HUMAN HGNC=17970 UniProtKB=Q9BPZ3,HUMAN HGNC=12420 UniProtKB=P49411                                 | translation regulator activity                                                                        |
| GO:0015630 | HUMAN HGNC=15848 UniProtKB=Q14141,HUMAN HGNC=2974 UniProtKB=P50570,HUMAN HGNC=9164 UniProtKB=Q99719,HUMAN HGNC=1717 UniProtKB=Q16181,HUMAN HGNC=29125 UniProtKB=Q9UQ16,HUMAN HGNC=11579 UniProtKB=O75347,HUMAN HGNC=7729 UniProtKB=Q15019                                                                                                  | microtubule cytoskeleton                                                                              |
| GO:0051258 | HUMAN HGNC=2973 UniProtKB=O00429,HUMAN HGNC=2974 UniProtKB=P50570,HUMAN HGNC=29125 UniProtKB=Q9UQ16                                                                                                                                                                                                                                        | protein polymerization                                                                                |
| GO:0008047 | HUMAN HGNC=20635 UniProtKB=Q14997,HUMAN HGNC=9308 UniProtKB=Q15257,HUMAN HGNC=9568 UniProtKB=Q06323                                                                                                                                                                                                                                        | enzyme activator activity                                                                             |
| GO:0008104 | HUMAN HGNC=16051 UniProtKB=Q8TEW0,HUMAN HGNC=1742 UniProtKB=P50851,HUMAN HGNC=16276 UniProtKB=Q9C035                                                                                                                                                                                                                                       | protein localization                                                                                  |
| GO:0030544 | HUMAN HGNC=10519 UniProtKB=Q9NZJ4,HUMAN HGNC=5270 UniProtKB=P25685                                                                                                                                                                                                                                                                         | Hsp70 protein binding                                                                                 |
| GO:0050772 | HUMAN HGNC=3338 UniProtKB=Q14247,HUMAN HGNC=2695 UniProtKB=Q16643,HUMAN HGNC=2696 UniProtKB=Q9UJU6,HUMAN HGNC=4844 UniProtKB=P14317                                                                                                                                                                                                        | positive regulation of axonogenesis                                                                   |
| GO:0097159 | HUMAN HGNC=11834 UniProtKB=P29401,HUMAN HGNC=9723 UniProtKB=P11216,HUMAN HGNC=9725 UniProtKB=P06737                                                                                                                                                                                                                                        | organic cyclic compound binding                                                                       |
| GO:0009895 | HUMAN HGNC=607 UniProtKB=P02654                                                                                                                                                                                                                                                                                                            | negative regulation of catabolic process                                                              |
| GO:0047555 | HUMAN HGNC=8784 UniProtKB=O76074                                                                                                                                                                                                                                                                                                           | 3',5'-cyclic-GMP phosphodiesterase activity                                                           |
| GO:0090559 | HUMAN HGNC=14685 UniProtKB=Q9Y624                                                                                                                                                                                                                                                                                                          | regulation of membrane permeability                                                                   |
| GO:0070972 | HUMAN HGNC=16695 UniProtKB=P51572                                                                                                                                                                                                                                                                                                          | protein localization to endoplasmic reticulum                                                         |
| GO:0045899 | HUMAN HGNC=9553 UniProtKB=P62333,HUMAN HGNC=9552 UniProtKB=P62195,HUMAN HGNC=9551 UniProtKB=P43686                                                                                                                                                                                                                                         | positive regulation of RNA polymerase II transcription                                                |

|            |                                                                                                                                                                                                                                                                                                                                                 |                                                                 |
|------------|-------------------------------------------------------------------------------------------------------------------------------------------------------------------------------------------------------------------------------------------------------------------------------------------------------------------------------------------------|-----------------------------------------------------------------|
|            |                                                                                                                                                                                                                                                                                                                                                 | preinitiation complex assembly                                  |
| GO:0030307 | HUMAN HGNC=3338 UniProtKB=Q14247,HUMAN HGNC=2695 UniProtKB=Q16643,HUMAN HGNC=2696 UniProtKB=Q9UJU6,HUMAN HGNC=4844 UniProtKB=P14317                                                                                                                                                                                                             | positive regulation of cell growth                              |
| GO:0005682 | HUMAN HGNC=20471 UniProtKB=O95777,HUMAN HGNC=5046 UniProtKB=P52272,HUMAN HGNC=29513 UniProtKB=O60306,HUMAN HGNC=5048 UniProtKB=Q00839                                                                                                                                                                                                           | U5 snRNP                                                        |
| GO:0009142 | HUMAN HGNC=361 UniProtKB=P00568                                                                                                                                                                                                                                                                                                                 | nucleoside triphosphate biosynthetic process                    |
| GO:0005750 | HUMAN HGNC=12582 UniProtKB=P14927,HUMAN HGNC=12590 UniProtKB=P07919                                                                                                                                                                                                                                                                             | mitochondrial respiratory chain complex III                     |
| GO:0016758 | HUMAN HGNC=24293 UniProtKB=Q70JA7,HUMAN HGNC=9723 UniProtKB=P11216,HUMAN HGNC=9725 UniProtKB=P06737                                                                                                                                                                                                                                             | transferase activity, transferring hexosyl groups               |
| GO:0000339 | HUMAN HGNC=13759 UniProtKB=Q7L576                                                                                                                                                                                                                                                                                                               | RNA cap binding                                                 |
| GO:0070566 | HUMAN HGNC=8087 UniProtKB=P29728                                                                                                                                                                                                                                                                                                                | adenylyltransferase activity                                    |
| PC00114    | HUMAN HGNC=4684 UniProtKB=P33402,HUMAN HGNC=14237 UniProtKB=Q96NT3                                                                                                                                                                                                                                                                              | guanylate cyclase                                               |
| GO:0007156 | HUMAN HGNC=19194 UniProtKB=Q96RW7,HUMAN HGNC=29557 UniProtKB=Q0ZGT2                                                                                                                                                                                                                                                                             | homophilic cell adhesion via plasma membrane adhesion molecules |
| GO:1990720 | HUMAN HGNC=8898 UniProtKB=P07205                                                                                                                                                                                                                                                                                                                | C2 axonemal microtubule                                         |
| GO:0032813 | HUMAN HGNC=17712 UniProtKB=O15304,HUMAN HGNC=3157 UniProtKB=Q92838,HUMAN HGNC=6711 UniProtKB=Q06643                                                                                                                                                                                                                                             | tumor necrosis factor receptor superfamily binding              |
| GO:0002699 | HUMAN HGNC=533 UniProtKB=P04083                                                                                                                                                                                                                                                                                                                 | positive regulation of immune effector process                  |
| GO:0031929 | HUMAN HGNC=18423 UniProtKB=O75140,HUMAN HGNC=15606 UniProtKB=Q9UHA4                                                                                                                                                                                                                                                                             | TOR signaling                                                   |
| GO:0097649 | HUMAN HGNC=8898 UniProtKB=P07205                                                                                                                                                                                                                                                                                                                | A axonemal microtubule                                          |
| GO:0008283 | HUMAN HGNC=8601 UniProtKB=Q06141,HUMAN HGNC=4037 UniProtKB=P06241,HUMAN HGNC=11364 UniProtKB=P40763,HUMAN HGNC=24588 UniProtKB=Q86XP6,HUMAN HGNC=19312 UniProtKB=Q56P03,HUMAN HGNC=12841 UniProtKB=P07947,HUMAN HGNC=11283 UniProtKB=P12931,HUMAN HGNC=7002 UniProtKB=A6NDR6,HUMAN HGNC=6735 UniProtKB=P07948,HUMAN HGNC=11766 UniProtKB=P01137 | cell population proliferation                                   |
| GO:0030295 | HUMAN HGNC=10372 UniProtKB=P05386                                                                                                                                                                                                                                                                                                               | protein kinase activator activity                               |
| GO:0065002 | HUMAN HGNC=5261 UniProtKB=P10809                                                                                                                                                                                                                                                                                                                | intracellular protein transmembrane transport                   |
| GO:0032509 | HUMAN HGNC=25153 UniProtKB=Q96EY5                                                                                                                                                                                                                                                                                                               | endosome transport via multivesicular body sorting pathway      |
| GO:0008608 | HUMAN HGNC=24054 UniProtKB=Q8NG31                                                                                                                                                                                                                                                                                                               | attachment of spindle microtubules to kinetochore               |
| GO:0005769 | HUMAN HGNC=9785 UniProtKB=P51148,HUMAN HGNC=9784 UniProtKB=P61020,HUMAN HGNC=3244 UniProtKB=Q9NZN3,HUMAN HGNC=11740 UniProtKB=P02787,HUMAN HGNC=18263 UniProtKB=Q9UL25                                                                                                                                                                          | early endosome                                                  |

|            |                                                                                                                                                                                                                                                                                                                                                                                                                     |                                                                            |
|------------|---------------------------------------------------------------------------------------------------------------------------------------------------------------------------------------------------------------------------------------------------------------------------------------------------------------------------------------------------------------------------------------------------------------------|----------------------------------------------------------------------------|
| PC00057    | HUMAN HGNC=8710 UniProtKB=Q9Y5G1,HUMAN HGNC=15902 UniProtKB=Q8IXH8,HUMAN HGNC=3230 UniProtKB=Q9NYQ7,HUMAN HGNC=3048 UniProtKB=Q02413,HUMAN HGNC=14674 UniProtKB=Q96QU1,HUMAN HGNC=14265 UniProtKB=Q86UP0,HUMAN HGNC=3231 UniProtKB=Q9HCU4,HUMAN HGNC=23112 UniProtKB=Q8TDW7                                                                                                                                         | cadherin<br>phosphotransferase activity,<br>phosphate group as<br>acceptor |
| GO:0016776 | HUMAN HGNC=29035 UniProtKB=O43314,HUMAN HGNC=9141 UniProtKB=Q15126<br>HUMAN HGNC=15720 UniProtKB=Q13033,HUMAN HGNC=13206 UniProtKB=O60296,HUMAN HGNC=11424 UniProtKB=O43815,HUMAN HGNC=3338 UniProtKB=Q14247,HUMAN HGNC=2695 UniProtKB=Q16643,HUMAN HGNC=6317 UniProtKB=O43896,HUMAN HGNC=2696 UniProtKB=Q9UJU6,HUMAN HGNC=6835 UniProtKB=P78559,HUMAN HGNC=4844 UniProtKB=P14317,HUMAN HGNC=11119 UniProtKB=Q99835 | dendrite                                                                   |
| GO:0000408 | HUMAN HGNC=20356 UniProtKB=Q9BXV9                                                                                                                                                                                                                                                                                                                                                                                   | EKC/KEOPS complex                                                          |
| GO:0036297 | HUMAN HGNC=23845 UniProtKB=Q8IY92<br>HUMAN HGNC=8504 UniProtKB=Q969R2,HUMAN HGNC=10996 UniProtKB=O14975,HUMAN HGNC=14637 UniProtKB=Q86UK0,HUMAN HGNC=603 UniProtKB=P04114                                                                                                                                                                                                                                           | interstrand cross-link repair                                              |
| GO:0005319 |                                                                                                                                                                                                                                                                                                                                                                                                                     | lipid transporter activity                                                 |
| GO:0032508 | HUMAN HGNC=533 UniProtKB=P04083                                                                                                                                                                                                                                                                                                                                                                                     | DNA duplex unwinding                                                       |
| GO:0071214 | HUMAN HGNC=28771 UniProtKB=Q9BVC6<br>HUMAN HGNC=15750 UniProtKB=P60981,HUMAN HGNC=9621 UniProtKB=Q6IBS0,HUMAN HGNC=12690 UniProtKB=P09327,HUMAN HGNC=12754 UniProtKB=O75083,HUMAN HGNC=1874 UniProtKB=P23528,HUMAN HGNC=243 UniProtKB=P35611,HUMAN HGNC=1488 UniProtKB=P52907,HUMAN HGNC=3750 UniProtKB=Q13045,HUMAN HGNC=1491 UniProtKB=P47756,HUMAN HGNC=15667 UniProtKB=P58546                                   | cellular response to abiotic<br>stimulus                                   |
| GO:0030042 |                                                                                                                                                                                                                                                                                                                                                                                                                     | actin filament<br>depolymerization                                         |
| GO:0016595 | HUMAN HGNC=16768 UniProtKB=O60391<br>HUMAN HGNC=11442 UniProtKB=O15400,HUMAN HGNC=12644 UniProtKB=Q15836,HUMAN HGNC=12647 UniProtKB=Q9BV40,HUMAN HGNC=9788 UniProtKB=P51149                                                                                                                                                                                                                                         | glutamate binding                                                          |
| GO:0006906 | HUMAN HGNC=1681 UniProtKB=P16070,HUMAN HGNC=10632 UniProtKB=P13501                                                                                                                                                                                                                                                                                                                                                  | vesicle fusion                                                             |
| GO:0070374 |                                                                                                                                                                                                                                                                                                                                                                                                                     | positive regulation of ERK1<br>and ERK2 cascade                            |
| GO:1901362 | HUMAN HGNC=2689 UniProtKB=P09172                                                                                                                                                                                                                                                                                                                                                                                    | organic cyclic compound<br>biosynthetic process                            |
| GO:0034394 | HUMAN HGNC=17643 UniProtKB=Q9HD26                                                                                                                                                                                                                                                                                                                                                                                   | protein localization to cell<br>surface                                    |
| GO:0048771 | HUMAN HGNC=533 UniProtKB=P04083                                                                                                                                                                                                                                                                                                                                                                                     | tissue remodeling                                                          |
| GO:0007094 | HUMAN HGNC=12401 UniProtKB=P33981                                                                                                                                                                                                                                                                                                                                                                                   | mitotic spindle assembly<br>checkpoint                                     |
| GO:0006629 | HUMAN HGNC=612 UniProtKB=P05090                                                                                                                                                                                                                                                                                                                                                                                     | lipid metabolic process                                                    |
| GO:0017048 | HUMAN HGNC=29327 UniProtKB=Q5VZ46                                                                                                                                                                                                                                                                                                                                                                                   | Rho GTPase binding                                                         |

|            |                                                                                                                                                                                                       |                                                                                 |
|------------|-------------------------------------------------------------------------------------------------------------------------------------------------------------------------------------------------------|---------------------------------------------------------------------------------|
| GO:1901605 | HUMAN HGNC=4433 UniProtKB=P00505,HUMAN HGNC=4335 UniProtKB=P00367,HUMAN HGNC=746 UniProtKB=P04424,HUMAN HGNC=12388 UniProtKB=Q16762,HUMAN HGNC=1424 UniProtKB=P27708,HUMAN HGNC=7223 UniProtKB=P25325 | alpha-amino acid metabolic process                                              |
| GO:0009260 | HUMAN HGNC=2520 UniProtKB=Q9NRF8                                                                                                                                                                      | ribonucleotide biosynthetic process                                             |
| GO:0031593 | HUMAN HGNC=13919 UniProtKB=P46379,HUMAN HGNC=12666 UniProtKB=P55072,HUMAN HGNC=9813 UniProtKB=P54727                                                                                                  | polyubiquitin modification-dependent protein binding                            |
| GO:0032543 | HUMAN HGNC=1243 UniProtKB=Q07021                                                                                                                                                                      | mitochondrial translation                                                       |
| GO:0065004 | HUMAN HGNC=4861 UniProtKB=Q9NRZ9                                                                                                                                                                      | protein-DNA complex assembly                                                    |
| GO:0032088 | HUMAN HGNC=27146 UniProtKB=Q5TA31                                                                                                                                                                     | negative regulation of NF-kappaB transcription factor activity                  |
| GO:0030031 | HUMAN HGNC=1736 UniProtKB=P60953                                                                                                                                                                      | cell projection assembly                                                        |
| GO:0044743 | HUMAN HGNC=5261 UniProtKB=P10809                                                                                                                                                                      | protein transmembrane import into intracellular organelle                       |
| GO:0006364 | HUMAN HGNC=25758 UniProtKB=Q8TED0,HUMAN HGNC=23818 UniProtKB=Q14684                                                                                                                                   | rRNA processing                                                                 |
| GO:0120036 | HUMAN HGNC=12690 UniProtKB=P09327                                                                                                                                                                     | plasma membrane bounded cell projection organization                            |
| GO:0031210 | HUMAN HGNC=1869 UniProtKB=P11597,HUMAN HGNC=9093 UniProtKB=P55058                                                                                                                                     | phosphatidylcholine binding                                                     |
| GO:0016298 | HUMAN HGNC=17038 UniProtKB=Q99685                                                                                                                                                                     | lipase activity                                                                 |
| GO:0097190 | HUMAN HGNC=17865 UniProtKB=Q96A26,HUMAN HGNC=544 UniProtKB=P08133                                                                                                                                     | apoptotic signaling pathway                                                     |
| GO:0051051 | HUMAN HGNC=9855 UniProtKB=P62834,HUMAN HGNC=607 UniProtKB=P02654,HUMAN HGNC=533 UniProtKB=P04083,HUMAN HGNC=9857 UniProtKB=P61224,HUMAN HGNC=17643 UniProtKB=Q9HD26,HUMAN HGNC=16937 UniProtKB=O75915 | negative regulation of transport                                                |
| GO:0030687 | HUMAN HGNC=23818 UniProtKB=Q14684                                                                                                                                                                     | preribosome, large subunit precursor                                            |
| GO:0060261 | HUMAN HGNC=19985 UniProtKB=P53999                                                                                                                                                                     | positive regulation of transcription initiation from RNA polymerase II promoter |
| GO:0019200 | HUMAN HGNC=8876 UniProtKB=P17858,HUMAN HGNC=4922 UniProtKB=P19367,HUMAN HGNC=8878 UniProtKB=Q01813                                                                                                    | carbohydrate kinase activity                                                    |
| GO:2001235 | HUMAN HGNC=17865 UniProtKB=Q96A26                                                                                                                                                                     | positive regulation of apoptotic signaling pathway                              |
| GO:0032101 | HUMAN HGNC=11491 UniProtKB=P43405,HUMAN HGNC=3537 UniProtKB=P25116                                                                                                                                    | regulation of response to external stimulus                                     |
| GO:0019438 | HUMAN HGNC=2689 UniProtKB=P09172                                                                                                                                                                      | aromatic compound biosynthetic process                                          |
| PC00122    | HUMAN HGNC=2689 UniProtKB=P09172                                                                                                                                                                      | hydroxylase                                                                     |
| GO:0023057 | HUMAN HGNC=9855 UniProtKB=P62834,HUMAN HGNC=9857 UniProtKB=P61224                                                                                                                                     | negative regulation of signaling                                                |
| GO:0008021 | HUMAN HGNC=31332 UniProtKB=Q6IQ22,HUMAN HGNC=7007 UniProtKB=P61006,HUMAN HGNC=11442 UniProtKB=O15400,HU                                                                                               | synaptic vesicle                                                                |

|            |                                                                                                                                                                                                        |                                                                     |
|------------|--------------------------------------------------------------------------------------------------------------------------------------------------------------------------------------------------------|---------------------------------------------------------------------|
|            | MAN HGNC=9164 UniProtKB=Q99719,HUMAN HGNC=9778 UniProtKB=P20337                                                                                                                                        |                                                                     |
| PC00135    | HUMAN HGNC=4458 UniProtKB=P06744,HUMAN HGNC=12009 UniProtKB=P60174,HUMAN HGNC=11609 UniProtKB=P24557                                                                                                   | isomerase                                                           |
| GO:0007059 | HUMAN HGNC=9112 UniProtKB=Q6P1K2                                                                                                                                                                       | chromosome segregation                                              |
| GO:0031965 | HUMAN HGNC=17103 UniProtKB=Q9Y5L0                                                                                                                                                                      | nuclear membrane                                                    |
| GO:0031397 | HUMAN HGNC=23077 UniProtKB=Q96FW1                                                                                                                                                                      | negative regulation of protein ubiquitination<br>regulation of G1/S |
| GO:2000045 | HUMAN HGNC=533 UniProtKB=P04083,HUMAN HGNC=9568 UniProtKB=Q06323                                                                                                                                       | transition of mitotic cell cycle                                    |
| GO:0070936 | HUMAN HGNC=463 UniProtKB=Q9UKV5,HUMAN HGNC=12475 UniProtKB=P62837                                                                                                                                      | protein K48-linked ubiquitination                                   |
| GO:0015301 | HUMAN HGNC=10991 UniProtKB=P05141,HUMAN HGNC=10992 UniProtKB=P12236,HUMAN HGNC=11027 UniProtKB=P02730                                                                                                  | anion:anion antiporter activity                                     |
|            | HUMAN HGNC=9554 UniProtKB=Q99460,HUMAN HGNC=9553 UniProtKB=P62333,HUMAN HGNC=9552 UniProtKB=P62195,HUMAN HGNC=9551 UniProtKB=P43686,HUMAN HGNC=9559 UniProtKB=Q13200                                   | proteasome regulatory particle, base subcomplex                     |
| GO:0008540 | HUMAN HGNC=11056 UniProtKB=P48067,HUMAN HGNC=800 UniProtKB=P50993,HUMAN HGNC=806 UniProtKB=P54709,HUMAN HGNC=10594 UniProtKB=Q01118,HUMAN HGNC=10582 UniProtKB=Q9Y5Y9                                  | sodium ion transmembrane transport                                  |
| GO:0035725 |                                                                                                                                                                                                        |                                                                     |
| GO:0099572 | HUMAN HGNC=2905 UniProtKB=O14490                                                                                                                                                                       | postsynaptic specialization                                         |
|            |                                                                                                                                                                                                        | positive regulation of                                              |
| GO:2001238 | HUMAN HGNC=1050 UniProtKB=P55957                                                                                                                                                                       | extrinsic apoptotic signaling pathway                               |
|            | HUMAN HGNC=15902 UniProtKB=Q8IXH8,HUMAN HGNC=243 UniProtKB=P35611,HUMAN HGNC=14265 UniProtKB=Q86UP0,HUMAN HGNC=6091 UniProtKB=P06213                                                                   | multicellular organism development                                  |
| GO:0007275 | HUMAN HGNC=26068 UniProtKB=Q6IAA8,HUMAN HGNC=17955 UniProtKB=O43504,HUMAN HGNC=2479 UniProtKB=O76096,HUMAN HGNC=2528 UniProtKB=P53634,HUMAN HGNC=913 UniProtKB=P20160,HUMAN HGNC=9788 UniProtKB=P51149 |                                                                     |
| GO:0005764 |                                                                                                                                                                                                        | lysosome                                                            |
| GO:0048709 | HUMAN HGNC=9086 UniProtKB=P60201                                                                                                                                                                       | oligodendrocyte differentiation                                     |
| GO:0051642 | HUMAN HGNC=16051 UniProtKB=Q8TEW0,HUMAN HGNC=14906 UniProtKB=Q8N4C6                                                                                                                                    | centrosome localization                                             |
|            | HUMAN HGNC=9866 UniProtKB=P13631,HUMAN HGNC=7967 UniProtKB=Q96RI1                                                                                                                                      | C4 zinc finger nuclear receptor                                     |
| PC00169    |                                                                                                                                                                                                        |                                                                     |
| GO:0050803 | HUMAN HGNC=2974 UniProtKB=P50570,HUMAN HGNC=29125 UniProtKB=Q9UQ16                                                                                                                                     | regulation of synapse structure or activity                         |
|            | HUMAN HGNC=3537 UniProtKB=P25116,HUMAN HGNC=6383 UniProtKB=P01042,HUMAN HGNC=4472 UniProtKB=Q14330,HUMAN HGNC=3540 UniProtKB=Q96RI0                                                                    | positive regulation of cytosolic calcium ion concentration          |
| GO:0007204 |                                                                                                                                                                                                        |                                                                     |
| GO:0017069 | HUMAN HGNC=17259 UniProtKB=Q9Y4Z0,HUMAN HGNC=5048 UniProtKB=Q00839                                                                                                                                     | snRNA binding                                                       |
|            | HUMAN HGNC=11491 UniProtKB=P43405,HUMAN HGNC=29327 UniProtKB=Q5VZ46,HUMAN HGNC=10534 UniProtKB=Q9NR31,HUMAN HGNC=5048 UniProtKB=Q00839                                                                 | regulation of cellular localization                                 |
| GO:0060341 |                                                                                                                                                                                                        |                                                                     |

|                           |                                                                                                                                                                                                                                                                                                                                                                                                                                                                                                                                                                                                                                                                                                                                                                                                                                                                                                                                                                                                                                                                                                                                                                                                                                                                                                                                                                                                                                                                                                                                                                                                                                                                                                                                                        |                                                                             |
|---------------------------|--------------------------------------------------------------------------------------------------------------------------------------------------------------------------------------------------------------------------------------------------------------------------------------------------------------------------------------------------------------------------------------------------------------------------------------------------------------------------------------------------------------------------------------------------------------------------------------------------------------------------------------------------------------------------------------------------------------------------------------------------------------------------------------------------------------------------------------------------------------------------------------------------------------------------------------------------------------------------------------------------------------------------------------------------------------------------------------------------------------------------------------------------------------------------------------------------------------------------------------------------------------------------------------------------------------------------------------------------------------------------------------------------------------------------------------------------------------------------------------------------------------------------------------------------------------------------------------------------------------------------------------------------------------------------------------------------------------------------------------------------------|-----------------------------------------------------------------------------|
|                           | HUMAN HGNC=12407 UniProtKB=P68366,HUMAN HGNC=654 UniProtKB=P61204,HUMAN HGNC=3778 UniProtKB=P02751,HUMAN HGNC=9391 UniProtKB=P13861,HUMAN HGNC=18756 UniProtKB=Q9BYZ6,HUMAN HGNC=9414 UniProtKB=Q13976,HUMAN HGNC=9862 UniProtKB=P61225,HUMAN HGNC=652 UniProtKB=P84077,HUMAN HGNC=12410 UniProtKB=Q9NY65,HUMAN HGNC=9380 UniProtKB=P17612,HUMAN HGNC=20778 UniProtKB=P07437,HUMAN HGNC=6407 UniProtKB=P01116,HUMAN HGNC=9392 UniProtKB=P31323,HUMAN HGNC=20766 UniProtKB=Q71U36,HUMAN HGNC=667 UniProtKB=P61586,HUMAN HGNC=4227 UniProtKB=P50395,HUMAN HGNC=9855 UniProtKB=P62834,HUMAN HGNC=659 UniProtKB=P62330,HUMAN HGNC=9840 UniProtKB=P11234,HUMAN HGNC=9381 UniProtKB=P22694,HUMAN HGNC=678 UniProtKB=P52565,HUMAN HGNC=692 UniProtKB=P40616,HUMAN HGNC=4226 UniProtKB=P31150,HUMAN HGNC=626 UniProtKB=P07741,HUMAN HGNC=9801 UniProtKB=P63000,HUMAN HGNC=669 UniProtKB=P08134,HUMAN HGNC=9857 UniProtKB=P61224,HUMAN HGNC=679 UniProtKB=P52566,HUMAN HGNC=20774 UniProtKB=P04350,HUMAN HGNC=10447 UniProtKB=P10301,HUMAN HGNC=11231 UniProtKB=Q8WXF7,HUMAN HGNC=658 UniProtKB=P84085,HUMAN HGNC=20771 UniProtKB=P68371,HUMAN HGNC=655 UniProtKB=P18085,HUMAN HGNC=24526 UniProtKB=Q6DD88,HUMAN HGNC=10011 UniProtKB=Q15382,HUMAN HGNC=9802 UniProtKB=P15153,HUMAN HGNC=1736 UniProtKB=P60953,HUMAN HGNC=16257 UniProtKB=Q9H4B7,HUMAN HGNC=2153 UniProtKB=Q9NQW8,HUMAN HGNC=9386 UniProtKB=Q9UGJ0,HUMAN HGNC=4234 UniProtKB=P55040                                                                                                                                                                                                                                                                                                             | carbohydrate derivative binding                                             |
| GO:009736<br>7            |                                                                                                                                                                                                                                                                                                                                                                                                                                                                                                                                                                                                                                                                                                                                                                                                                                                                                                                                                                                                                                                                                                                                                                                                                                                                                                                                                                                                                                                                                                                                                                                                                                                                                                                                                        |                                                                             |
| GO:003067<br>7            | HUMAN HGNC=26022 UniProtKB=Q7L0Y3                                                                                                                                                                                                                                                                                                                                                                                                                                                                                                                                                                                                                                                                                                                                                                                                                                                                                                                                                                                                                                                                                                                                                                                                                                                                                                                                                                                                                                                                                                                                                                                                                                                                                                                      | ribonuclease P complex                                                      |
| PC00021                   | HUMAN HGNC=3537 UniProtKB=P25116,HUMAN HGNC=4472 UniProtKB=Q14330,HUMAN HGNC=3540 UniProtKB=Q96RI0,HUMAN HGNC=23077 UniProtKB=Q96FW1,HUMAN HGNC=2528 UniProtKB=P53634,HUMAN HGNC=1476 UniProtKB=P07384,HUMAN HGNC=20063 UniProtKB=Q86T82,HUMAN HGNC=12628 UniProtKB=P45974,HUMAN HGNC=735 UniProtKB=Q13510,HUMAN HGNC=12612 UniProtKB=P54578,HUMAN HGNC=25035 UniProtKB=Q5VVQ6,HUMAN HGNC=4248 UniProtKB=Q92820,HUMAN HGNC=9472 UniProtKB=Q99538,HUMAN HGNC=13485 UniProtKB=Q9BXU7,HUMAN HGNC=20076 UniProtKB=Q96K76                                                                                                                                                                                                                                                                                                                                                                                                                                                                                                                                                                                                                                                                                                                                                                                                                                                                                                                                                                                                                                                                                                                                                                                                                                   | G-protein coupled receptor                                                  |
| PC00081<br>GO:001978<br>3 | HUMAN HGNC=23077 UniProtKB=Q96FW1                                                                                                                                                                                                                                                                                                                                                                                                                                                                                                                                                                                                                                                                                                                                                                                                                                                                                                                                                                                                                                                                                                                                                                                                                                                                                                                                                                                                                                                                                                                                                                                                                                                                                                                      | cysteine protease                                                           |
| GO:001676<br>5            | HUMAN HGNC=4635 UniProtKB=P21266,HUMAN HGNC=4634 UniProtKB=P28161,HUMAN HGNC=4632 UniProtKB=P09488,HUMAN HGNC=4638 UniProtKB=P09211                                                                                                                                                                                                                                                                                                                                                                                                                                                                                                                                                                                                                                                                                                                                                                                                                                                                                                                                                                                                                                                                                                                                                                                                                                                                                                                                                                                                                                                                                                                                                                                                                    | ubiquitin-like protein-specific protease activity                           |
| GO:000077<br>6            | HUMAN HGNC=12401 UniProtKB=P33981,HUMAN HGNC=28959 UniProtKB=Q14008,HUMAN HGNC=5048 UniProtKB=Q00839                                                                                                                                                                                                                                                                                                                                                                                                                                                                                                                                                                                                                                                                                                                                                                                                                                                                                                                                                                                                                                                                                                                                                                                                                                                                                                                                                                                                                                                                                                                                                                                                                                                   | transferase activity, transferring alkyl or aryl (other than methyl) groups |
| GO:003301<br>7            | HUMAN HGNC=813 UniProtKB=Q93084,HUMAN HGNC=812 UniProtKB=P16615                                                                                                                                                                                                                                                                                                                                                                                                                                                                                                                                                                                                                                                                                                                                                                                                                                                                                                                                                                                                                                                                                                                                                                                                                                                                                                                                                                                                                                                                                                                                                                                                                                                                                        | kinetochore                                                                 |
|                           | HUMAN HGNC=654 UniProtKB=P61204,HUMAN HGNC=5046 UniProtKB=P52272,HUMAN HGNC=9545 UniProtKB=P28062,HUMAN HGNC=316 UniProtKB=P43652,HUMAN HGNC=12410 UniProtKB=Q9NY65,HUMAN HGNC=17905 UniProtKB=Q9Y613,HUMAN HGNC=22125 UniProtKB=O95522,HUMAN HGNC=14653 UniProtKB=Q9HBI1,HUMAN HGNC=18585 UniProtKB=Q96DH6,HUMAN HGNC=12407 UniProtKB=P68366,HUMAN HGNC=654 UniProtKB=P61204,HUMAN HGNC=3778 UniProtKB=P02751,HUMAN HGNC=9391 UniProtKB=P13861,HUMAN HGNC=18756 UniProtKB=Q9BYZ6,HUMAN HGNC=9414 UniProtKB=Q13976,HUMAN HGNC=9862 UniProtKB=P61225,HUMAN HGNC=652 UniProtKB=P84077,HUMAN HGNC=12410 UniProtKB=Q9NY65,HUMAN HGNC=9380 UniProtKB=P17612,HUMAN HGNC=20778 UniProtKB=P07437,HUMAN HGNC=6407 UniProtKB=P01116,HUMAN HGNC=9392 UniProtKB=P31323,HUMAN HGNC=20766 UniProtKB=Q71U36,HUMAN HGNC=667 UniProtKB=P61586,HUMAN HGNC=4227 UniProtKB=P50395,HUMAN HGNC=9855 UniProtKB=P62834,HUMAN HGNC=659 UniProtKB=P62330,HUMAN HGNC=9840 UniProtKB=P11234,HUMAN HGNC=9381 UniProtKB=P22694,HUMAN HGNC=678 UniProtKB=P52565,HUMAN HGNC=692 UniProtKB=P40616,HUMAN HGNC=4226 UniProtKB=P31150,HUMAN HGNC=626 UniProtKB=P07741,HUMAN HGNC=9801 UniProtKB=P63000,HUMAN HGNC=669 UniProtKB=P08134,HUMAN HGNC=9857 UniProtKB=P61224,HUMAN HGNC=679 UniProtKB=P52566,HUMAN HGNC=20774 UniProtKB=P04350,HUMAN HGNC=10447 UniProtKB=P10301,HUMAN HGNC=11231 UniProtKB=Q8WXF7,HUMAN HGNC=658 UniProtKB=P84085,HUMAN HGNC=20771 UniProtKB=P68371,HUMAN HGNC=655 UniProtKB=P18085,HUMAN HGNC=24526 UniProtKB=Q6DD88,HUMAN HGNC=10011 UniProtKB=Q15382,HUMAN HGNC=9802 UniProtKB=P15153,HUMAN HGNC=1736 UniProtKB=P60953,HUMAN HGNC=16257 UniProtKB=Q9H4B7,HUMAN HGNC=2153 UniProtKB=Q9NQW8,HUMAN HGNC=9386 UniProtKB=Q9UGJ0,HUMAN HGNC=4234 UniProtKB=P55040 | sarcoplasmic reticulum membrane                                             |
| GO:000573<br>7            |                                                                                                                                                                                                                                                                                                                                                                                                                                                                                                                                                                                                                                                                                                                                                                                                                                                                                                                                                                                                                                                                                                                                                                                                                                                                                                                                                                                                                                                                                                                                                                                                                                                                                                                                                        | cytoplasm                                                                   |

C=10494|UniProtKB=P26447,HUMAN|HGNC=27146|UniProtKB=Q5TA31,HUMAN|HGNC=9536|UniProtKB=O14818,HUMAN|HGNC=12468|UniProtKB=POCG48,HUMAN|HGNC=9846|UniProtKB=P62826,HUMAN|HGNC=4312|UniProtKB=P48507,HUMAN|HGNC=9021|UniProtKB=P14618,HUMAN|HGNC=13420|UniProtKB=Q86TP1,HUMAN|HGNC=9723|UniProtKB=P11216,HUMAN|HGNC=30535|UniProtKB=Q8WVJ2,HUMAN|HGNC=612|UniProtKB=P05090,HUMAN|HGNC=399|UniProtKB=P02768,HUMAN|HGNC=9281|UniProtKB=P62136,HUMAN|HGNC=30646|UniProtKB=Q7KZF4,HUMAN|HGNC=6528|UniProtKB=P13796,HUMAN|HGNC=6616|UniProtKB=P48059,HUMAN|HGNC=9355|UniProtKB=P30044,HUMAN|HGNC=4622|UniProtKB=Q8IYD1,HUMAN|HGNC=8881|UniProtKB=P07737,HUMAN|HGNC=13200|UniProtKB=Q15942,HUMAN|HGNC=4621|UniProtKB=P15170,HUMAN|HGNC=16219|UniProtKB=Q8TEA8,HUMAN|HGNC=11226|UniProtKB=Q96JI7,HUMAN|HGNC=369|UniProtKB=Q9UKA4,HUMAN|HGNC=20774|UniProtKB=P04350,HUMAN|HGNC=7732|UniProtKB=Q15843,HUMAN|HGNC=12729|UniProtKB=P23381,HUMAN|HGNC=9531|UniProtKB=P25787,HUMAN|HGNC=535|UniProtKB=P50995,HUMAN|HGNC=6767|UniProtKB=Q15797,HUMAN|HGNC=4699|UniProtKB=P46976,HUMAN|HGNC=9539|UniProtKB=P49721,HUMAN|HGNC=20908|UniProtKB=Q86YF9,HUMAN|HGNC=1476|UniProtKB=P07384,HUMAN|HGNC=19825|UniProtKB=Q6SA08,HUMAN|HGNC=9568|UniProtKB=Q06323,HUMAN|HGNC=226|UniProtKB=P78563,HUMAN|HGNC=1373|UniProtKB=P00918,HUMAN|HGNC=9386|UniProtKB=Q9UGJ0,HUMAN|HGNC=3297|UniProtKB=P78344,HUMAN|HGNC=19760|UniProtKB=Q96T51,HUMAN|HGNC=12407|UniProtKB=P68366,HUMAN|HGNC=9533|UniProtKB=P25789,HUMAN|HGNC=12022|UniProtKB=P13693,HUMAN|HGNC=4187|UniProtKB=P02774,HUMAN|HGNC=4926|UniProtKB=O15212,HUMAN|HGNC=12733|UniProtKB=Q9Y6W5,HUMAN|HGNC=11582|UniProtKB=Q15813,HUMAN|HGNC=20778|UniProtKB=P07437,HUMAN|HGNC=20766|UniProtKB=Q71U36,HUMAN|HGNC=26363|UniProtKB=Q86YJ7,HUMAN|HGNC=4227|UniProtKB=P50395,HUMAN|HGNC=12463|UniProtKB=POCG47,HUMAN|HGNC=33749|UniProtKB=Q52MB2,HUMAN|HGNC=711|UniProtKB=P49407,HUMAN|HGNC=12458|UniProtKB=P62987,HUMAN|HGNC=26928|UniProtKB=Q9UKY7,HUMAN|HGNC=10823|UniProtKB=O75368,HUMAN|HGNC=544|UniProtKB=P08133,HUMAN|HGNC=5240|UniProtKB=P48741,HUMAN|HGNC=11138|UniProtKB=P37840,HUMAN|HGNC=30205|UniProtKB=Q9H7C9,HUMAN|HGNC=8868|UniProtKB=Q9NQP4,HUMAN|HGNC=708|UniProtKB=O15511,HUMAN|HGNC=537|UniProtKB=P07355,HUMAN|HGNC=20040|UniProtKB=Q01518,HUMAN|HGNC=6111|UniProtKB=Q13576,HUMAN|HGNC=11148|UniProtKB=Q16658,HUMAN|HGNC=9302|UniProtKB=P30153,HUMAN|HGNC=1735|UniProtKB=Q16543,HUMAN|HGNC=15568|UniProtKB=Q9H299,HUMAN|HGNC=29884|UniProtKB=Q8TF42,HUMAN|HGNC=11619|UniProtKB=Q15370,HUMAN|HGNC=746|UniProtKB=P04424,HUMAN|HGNC=1507|UniProtKB=P55212,HUMAN|HGNC=658|UniProtKB=P84085,HUMAN|HGNC=28235|UniProtKB=Q96IU4,HUMAN|HGNC=1090|UniProtKB=Q03001,HUMAN|HGNC=15578|UniProtKB=Q96D71,HUMAN|HGNC=10690|UniProtKB=O95810,HUMAN|HGNC=17150|UniProtKB=Q9Y2V2,HUMAN|HGNC=10499|UniProtKB=P06702,HUMAN|HGNC=16391|UniProtKB=Q9H257,HUMAN|HGNC=16276|UniProtKB=Q9C035,HUMAN|HGNC

=6871|UniProtKB=P28482,HUMAN|HGNC=9308|UniProtKB=Q15257,HUMAN|HGNC=12363|UniProtKB=P49815,HUMAN|HGNC=16476|UniProtKB=Q9H0E2,HUMAN|HGNC=9462|UniProtKB=P60891,HUMAN|HGNC=5044|UniProtKB=P61978,HUMAN|HGNC=4396|UniProtKB=P62873,HUMAN|HGNC=1745|UniProtKB=O00311,HUMAN|HGNC=543|UniProtKB=P08758,HUMAN|HGNC=9465|UniProtKB=P11908,HUMAN|HGNC=2520|UniProtKB=Q9NRF8,HUMAN|HGNC=20597|UniProtKB=P61960,HUMAN|HGNC=5239|UniProtKB=P17066,HUMAN|HGNC=3213|UniProtKB=P26641,HUMAN|HGNC=24254|UniProtKB=Q96CN7,HUMAN|HGNC=1424|UniProtKB=P27708,HUMAN|HGNC=18994|UniProtKB=Q8TDC3,HUMAN|HGNC=7377|UniProtKB=Q9UJ68,HUMAN|HGNC=6876|UniProtKB=Q16539,HUMAN|HGNC=10432|UniProtKB=P51812,HUMAN|HGNC=1504|UniProtKB=P42574,HUMAN|HGNC=9581|UniProtKB=Q9H939,HUMAN|HGNC=1516|UniProtKB=P04040,HUMAN|HGNC=18170|UniProtKB=P30085,HUMAN|HGNC=9530|UniProtKB=P25786,HUMAN|HGNC=10542|UniProtKB=O95248,HUMAN|HGNC=15687|UniProtKB=O75563,HUMAN|HGNC=16452|UniProtKB=P0DN86,HUMAN|HGNC=7910|UniProtKB=P06748,HUMAN|HGNC=21740|UniProtKB=Q6ZV73,HUMAN|HGNC=27937|UniProtKB=Q6ZVH7,HUMAN|HGNC=12690|UniProtKB=P09327,HUMAN|HGNC=2712|UniProtKB=Q13561,HUMAN|HGNC=626|UniProtKB=P07741,HUMAN|HGNC=533|UniProtKB=P04083,HUMAN|HGNC=30765|UniProtKB=Q9UKE5,HUMAN|HGNC=6510|UniProtKB=P16949,HUMAN|HGNC=6400|UniProtKB=Q14974,HUMAN|HGNC=17820|UniProtKB=Q9H0P0,HUMAN|HGNC=20771|UniProtKB=P68371,HUMAN|HGNC=8903|UniProtKB=O95336,HUMAN|HGNC=9725|UniProtKB=P06737,HUMAN|HGNC=6971|UniProtKB=P40926,HUMAN|HGNC=1368|UniProtKB=P00915,HUMAN|HGNC=7590|UniProtKB=Q15746,HUMAN|HGNC=10252|UniProtKB=O75116,HUMAN|HGNC=8647|UniProtKB=Q15365,HUMAN|HGNC=15878|UniProtKB=Q9NQ75,HUMAN|HGNC=7629|UniProtKB=E9PAV3,HUMAN|HGNC=11881|UniProtKB=P62328,HUMAN|HGNC=1738|UniProtKB=Q9Y5S2,HUMAN|HGNC=21035|UniProtKB=Q8N392,HUMAN|HGNC=6401|UniProtKB=Q92973,HUMAN|HGNC=652|UniProtKB=P84077,HUMAN|HGNC=4162|UniProtKB=P41250,HUMAN|HGNC=12469|UniProtKB=P22314,HUMAN|HGNC=20731|UniProtKB=Q9HAV0,HUMAN|HGNC=7892|UniProtKB=P00491,HUMAN|HGNC=8927|UniProtKB=Q93100,HUMAN|HGNC=3964|UniProtKB=P01225,HUMAN|HGNC=7900|UniProtKB=P55786,HUMAN|HGNC=10898|UniProtKB=Q15477,HUMAN|HGNC=13759|UniProtKB=Q7L576,HUMAN|HGNC=11408|UniProtKB=Q13043,HUMAN|HGNC=29351|UniProtKB=Q9C0H5,HUMAN|HGNC=9540|UniProtKB=P49720,HUMAN|HGNC=6737|UniProtKB=O75608,HUMAN|HGNC=9354|UniProtKB=P30048,HUMAN|HGNC=659|UniProtKB=P62330,HUMAN|HGNC=3750|UniProtKB=Q13045,HUMAN|HGNC=17860|UniProtKB=Q8NC51,HUMAN|HGNC=15667|UniProtKB=P58546,HUMAN|HGNC=16721|UniProtKB=A6NKQ9,HUMAN|HGNC=8648|UniProtKB=Q15366,HUMAN|HGNC=4226|UniProtKB=P31150,HUMAN|HGNC=317|UniProtKB=P02771,HUMAN|HGNC=545|UniProtKB=P20073,HUMAN|HGNC=4398|UniProtKB=P62879,HUMAN|HGNC=15567|UniProtKB=Q9UJC5,HUMAN|HGNC=28164|UniProtKB=Q96M27,HUMAN|HGNC=17970|UniProtKB=Q9BP23,HUMAN|HGNC=655|UniProtKB=P18085,HUMAN|HGNC=17780|UniProtKB=Q562R1,HUMAN|HGNC=9535|UniProtKB=P60900,HUMAN|HGNC=485

|                           |                                                                                                                                                                                                                                                                                                                                                                                                                                                                                                                                                                                                                                                                                                                                                                                                                                                                                                                                                        |                                                            |
|---------------------------|--------------------------------------------------------------------------------------------------------------------------------------------------------------------------------------------------------------------------------------------------------------------------------------------------------------------------------------------------------------------------------------------------------------------------------------------------------------------------------------------------------------------------------------------------------------------------------------------------------------------------------------------------------------------------------------------------------------------------------------------------------------------------------------------------------------------------------------------------------------------------------------------------------------------------------------------------------|------------------------------------------------------------|
|                           | 1 UniProtKB=P42858,HUMAN HGNC=12379 UniProtKB=Q15631,<br>HUMAN HGNC=30140 UniProtKB=A7MCY6,HUMAN HGNC=30410<br> UniProtKB=Q9BXA6,HUMAN HGNC=8728 UniProtKB=P22061,HU<br>MAN HGNC=18808 UniProtKB=Q9Y6E2,HUMAN HGNC=16257 U<br>niProtKB=Q9H4B7,HUMAN HGNC=9645 UniProtKB=Q05209,HUM<br>AN HGNC=10899 UniProtKB=P63208,HUMAN HGNC=20347 UniP<br>rotKB=Q9H9C1,HUMAN HGNC=18173 UniProtKB=Q9NZ08,HUMA<br>N HGNC=9532 UniProtKB=P25788,HUMAN HGNC=9537 UniProtK<br>B=P20618,HUMAN HGNC=8955 UniProtKB=P50453                                                                                                                                                                                                                                                                                                                                                                                                                                                |                                                            |
| GO:004408<br>9            | HUMAN HGNC=3757 UniProtKB=O75955,HUMAN HGNC=8881 U<br>niProtKB=P07737,HUMAN HGNC=21295 UniProtKB=Q8TE68<br>HUMAN HGNC=8876 UniProtKB=P17858,HUMAN HGNC=418 Uni<br>ProtKB=P09972,HUMAN HGNC=253 UniProtKB=P11766,HUMAN <br>HGNC=4458 UniProtKB=P06744,HUMAN HGNC=4141 UniProtKB=<br>P04406,HUMAN HGNC=7863 UniProtKB=Q13423,HUMAN HGNC=<br>2898 UniProtKB=P09622,HUMAN HGNC=11834 UniProtKB=P2940<br>1,HUMAN HGNC=8878 UniProtKB=Q01813,HUMAN HGNC=8891 <br>UniProtKB=P52209,HUMAN HGNC=8903 UniProtKB=O95336,HU<br>MAN HGNC=8898 UniProtKB=P07205,HUMAN HGNC=4922 UniPr<br>otKB=P19367,HUMAN HGNC=414 UniProtKB=P04075,HUMAN H<br>GNC=3350 UniProtKB=P06733,HUMAN HGNC=12009 UniProtKB=<br>P60174,HUMAN HGNC=3353 UniProtKB=P09104,HUMAN HGNC=<br>9021 UniProtKB=P14618,HUMAN HGNC=251 UniProtKB=P00326,<br>HUMAN HGNC=3354 UniProtKB=P13929,HUMAN HGNC=613 Uni<br>ProtKB=P02649,HUMAN HGNC=13312 UniProtKB=P78417,HUMA<br>N HGNC=255 UniProtKB=P28332 | positive regulation of<br>cellular component<br>biogenesis |
| GO:005511<br>4            | HUMAN HGNC=12492 UniProtKB=P61088,HUMAN HGNC=12494<br> UniProtKB=Q13404                                                                                                                                                                                                                                                                                                                                                                                                                                                                                                                                                                                                                                                                                                                                                                                                                                                                                | oxidation-reduction process                                |
| GO:000630<br>1            |                                                                                                                                                                                                                                                                                                                                                                                                                                                                                                                                                                                                                                                                                                                                                                                                                                                                                                                                                        | postreplication repair                                     |
| GO:005123<br>5            | HUMAN HGNC=17643 UniProtKB=Q9HD26                                                                                                                                                                                                                                                                                                                                                                                                                                                                                                                                                                                                                                                                                                                                                                                                                                                                                                                      | maintenance of location                                    |
| GO:007170<br>4            | HUMAN HGNC=343 UniProtKB=P23526                                                                                                                                                                                                                                                                                                                                                                                                                                                                                                                                                                                                                                                                                                                                                                                                                                                                                                                        | organic substance<br>metabolic process                     |
| GO:005080<br>4            | HUMAN HGNC=2905 UniProtKB=O14490<br>HUMAN HGNC=6325 UniProtKB=O60282,HUMAN HGNC=12652 <br>UniProtKB=P50552,HUMAN HGNC=18271 UniProtKB=Q8N8S7,HU<br>MAN HGNC=11085 UniProtKB=O75093,HUMAN HGNC=19296 U<br>niProtKB=Q9UF33,HUMAN HGNC=29557 UniProtKB=Q0ZGT2,HU<br>MAN HGNC=11119 UniProtKB=Q99835                                                                                                                                                                                                                                                                                                                                                                                                                                                                                                                                                                                                                                                       | modulation of chemical<br>synaptic transmission            |
| GO:000741<br>1            | HUMAN HGNC=11594 UniProtKB=Q96SF7,HUMAN HGNC=14010<br> UniProtKB=Q8IW19,HUMAN HGNC=11590 UniProtKB=Q16650                                                                                                                                                                                                                                                                                                                                                                                                                                                                                                                                                                                                                                                                                                                                                                                                                                              | axon guidance<br>Rel homology transcription<br>factor      |
| PC00252<br>GO:000675<br>3 | HUMAN HGNC=8052 UniProtKB=Q9UKK9<br>HUMAN HGNC=706 UniProtKB=O15145,HUMAN HGNC=12733 U<br>niProtKB=Q9Y6W5,HUMAN HGNC=705 UniProtKB=O15144,HUMA<br>N HGNC=169 UniProtKB=P61160,HUMAN HGNC=704 UniProtKB=<br>O15143,HUMAN HGNC=4374 UniProtKB=O60234,HUMAN HGNC<br>=170 UniProtKB=P61158,HUMAN HGNC=708 UniProtKB=O15511<br>HUMAN HGNC=4750 UniProtKB=Q99879,HUMAN HGNC=32060 <br>UniProtKB=Q5TEC6,HUMAN HGNC=20508 UniProtKB=Q8IUE6,HU<br>MAN HGNC=4746 UniProtKB=P62807,HUMAN HGNC=20514 Uni<br>ProtKB=Q8N257,HUMAN HGNC=24700 UniProtKB=Q5QNW6,HU<br>MAN HGNC=4719 UniProtKB=P16401,HUMAN HGNC=4747 UniPr                                                                                                                                                                                                                                                                                                                                             | nucleoside phosphate<br>metabolic process                  |
| GO:003431<br>4            |                                                                                                                                                                                                                                                                                                                                                                                                                                                                                                                                                                                                                                                                                                                                                                                                                                                                                                                                                        | Arp2/3 complex-mediated<br>actin nucleation                |
| PC00118                   |                                                                                                                                                                                                                                                                                                                                                                                                                                                                                                                                                                                                                                                                                                                                                                                                                                                                                                                                                        | histone                                                    |

|            |                                                                                                                                                                                                                                                                                                                                                                                                                                                                                                                                                                                                                                                                                                                                                                                                                                                                                                                                                                                                                                                                        |                                                            |
|------------|------------------------------------------------------------------------------------------------------------------------------------------------------------------------------------------------------------------------------------------------------------------------------------------------------------------------------------------------------------------------------------------------------------------------------------------------------------------------------------------------------------------------------------------------------------------------------------------------------------------------------------------------------------------------------------------------------------------------------------------------------------------------------------------------------------------------------------------------------------------------------------------------------------------------------------------------------------------------------------------------------------------------------------------------------------------------|------------------------------------------------------------|
|            | otKB=P58876,HUMAN HGNC=13954 UniProtKB=O60814,HUMAN HGNC=4762 UniProtKB=P57053,HUMAN HGNC=4716 UniProtKB=P16403,HUMAN HGNC=4718 UniProtKB=P10412,HUMAN HGNC=4755 UniProtKB=Q93079,HUMAN HGNC=4749 UniProtKB=Q99877                                                                                                                                                                                                                                                                                                                                                                                                                                                                                                                                                                                                                                                                                                                                                                                                                                                     |                                                            |
| GO:0015085 | HUMAN HGNC=813 UniProtKB=Q93084,HUMAN HGNC=812 UniProtKB=P16615                                                                                                                                                                                                                                                                                                                                                                                                                                                                                                                                                                                                                                                                                                                                                                                                                                                                                                                                                                                                        | calcium ion transmembrane transporter activity             |
| GO:0043123 | HUMAN HGNC=16391 UniProtKB=Q9H257,HUMAN HGNC=16276 UniProtKB=Q9C035,HUMAN HGNC=9275 UniProtKB=P35813                                                                                                                                                                                                                                                                                                                                                                                                                                                                                                                                                                                                                                                                                                                                                                                                                                                                                                                                                                   | positive regulation of I-kappaB kinase/NF-kappaB signaling |
| GO:0006040 | HUMAN HGNC=9959 UniProtKB=P51606,HUMAN HGNC=24822 UniProtKB=Q9H479                                                                                                                                                                                                                                                                                                                                                                                                                                                                                                                                                                                                                                                                                                                                                                                                                                                                                                                                                                                                     | amino sugar metabolic process                              |
| PC00144    | HUMAN HGNC=3350 UniProtKB=P06733,HUMAN HGNC=3353 UniProtKB=P09104,HUMAN HGNC=28477 UniProtKB=Q8NBM8,HUMAN HGNC=3354 UniProtKB=P13929,HUMAN HGNC=746 UniProtKB=P04424,HUMAN HGNC=291 UniProtKB=P30566                                                                                                                                                                                                                                                                                                                                                                                                                                                                                                                                                                                                                                                                                                                                                                                                                                                                   | lyase                                                      |
| GO:0043565 | HUMAN HGNC=21605 UniProtKB=Q14151                                                                                                                                                                                                                                                                                                                                                                                                                                                                                                                                                                                                                                                                                                                                                                                                                                                                                                                                                                                                                                      | sequence-specific DNA binding                              |
| GO:0005770 | HUMAN HGNC=2479 UniProtKB=O76096,HUMAN HGNC=20954 UniProtKB=Q9NP79,HUMAN HGNC=13487 UniProtKB=Q96QK1,HUMAN HGNC=9788 UniProtKB=P51149                                                                                                                                                                                                                                                                                                                                                                                                                                                                                                                                                                                                                                                                                                                                                                                                                                                                                                                                  | late endosome                                              |
| GO:0003341 | HUMAN HGNC=2949 UniProtKB=Q8TD57,HUMAN HGNC=25631 UniProtKB=Q96MT7                                                                                                                                                                                                                                                                                                                                                                                                                                                                                                                                                                                                                                                                                                                                                                                                                                                                                                                                                                                                     | cilium movement                                            |
| GO:0097539 | HUMAN HGNC=14906 UniProtKB=Q8N4C6                                                                                                                                                                                                                                                                                                                                                                                                                                                                                                                                                                                                                                                                                                                                                                                                                                                                                                                                                                                                                                      | ciliary transition fiber                                   |
| GO:0007031 | HUMAN HGNC=21689 UniProtKB=Q9Y3D6                                                                                                                                                                                                                                                                                                                                                                                                                                                                                                                                                                                                                                                                                                                                                                                                                                                                                                                                                                                                                                      | peroxisome organization                                    |
| PC00140    | HUMAN HGNC=9391 UniProtKB=P13861,HUMAN HGNC=9392 UniProtKB=P31323,HUMAN HGNC=9386 UniProtKB=Q9UGJ0,HUMAN HGNC=9388 UniProtKB=P10644                                                                                                                                                                                                                                                                                                                                                                                                                                                                                                                                                                                                                                                                                                                                                                                                                                                                                                                                    | kinase modulator                                           |
| GO:0005347 | HUMAN HGNC=10991 UniProtKB=P05141,HUMAN HGNC=10992 UniProtKB=P12236,HUMAN HGNC=19375 UniProtKB=Q9BV35                                                                                                                                                                                                                                                                                                                                                                                                                                                                                                                                                                                                                                                                                                                                                                                                                                                                                                                                                                  | ATP transmembrane transporter activity                     |
| GO:0044281 | HUMAN HGNC=8527 UniProtKB=P55809                                                                                                                                                                                                                                                                                                                                                                                                                                                                                                                                                                                                                                                                                                                                                                                                                                                                                                                                                                                                                                       | small molecule metabolic process                           |
| GO:0005102 | HUMAN HGNC=5575 UniProtKB=A0A0B4J1V2,HUMAN HGNC=5645 UniProtKB=A0A0C4DH34,HUMAN HGNC=11085 UniProtKB=O75093,HUMAN HGNC=5549 UniProtKB=A0A0C4DH31,HUMAN HGNC=14637 UniProtKB=Q86UK0,HUMAN HGNC=5554 UniProtKB=P01743,HUMAN HGNC=5480 UniProtKB=P01880,HUMAN HGNC=5659 UniProtKB=A0A0C4DH38,HUMAN HGNC=5634 UniProtKB=A0A075B7F0,HUMAN HGNC=12841 UniProtKB=P07947,HUMAN HGNC=6735 UniProtKB=P07948,HUMAN HGNC=11075 UniProtKB=O14745,HUMAN HGNC=38476 UniProtKB=B9A064,HUMAN HGNC=4037 UniProtKB=P06241,HUMAN HGNC=18233 UniProtKB=Q8NDB2,HUMAN HGNC=5861 UniProtKB=A0M8Q6,HUMAN HGNC=5647 UniProtKB=A0A087WSY4,HUMAN HGNC=5563 UniProtKB=A0A075B7D0,HUMAN HGNC=5856 UniProtKB=P0DOY2,HUMAN HGNC=5606 UniProtKB=P01763,HUMAN HGNC=15474 UniProtKB=Q9Y566,HUMAN HGNC=5576 UniProtKB=P01817,HUMAN HGNC=5528 UniProtKB=P01861,HUMAN HGNC=5541 UniProtKB=P01871,HUMAN HGNC=5585 UniProtKB=A0A0C4DH32,HUMAN HGNC=11119 UniProtKB=Q99835,HUMAN HGNC=5551 UniProtKB=A0A0C4DH33,HUMAN HGNC=5526 UniProtKB=P01859,HUMAN HGNC=5657 UniProtKB=P0DP08,HUMAN Ensembl=ENSG00000282639 | signaling receptor binding                                 |

|            |                                                                                                                                                                                                                                                                                                                                                                                                                                                                                                                                                                                                                                                                                                                                                                                                                                                                                                                                                                                                                                                                                                                                                                                                                                                                                                                                                                                                                                                           |                                                       |
|------------|-----------------------------------------------------------------------------------------------------------------------------------------------------------------------------------------------------------------------------------------------------------------------------------------------------------------------------------------------------------------------------------------------------------------------------------------------------------------------------------------------------------------------------------------------------------------------------------------------------------------------------------------------------------------------------------------------------------------------------------------------------------------------------------------------------------------------------------------------------------------------------------------------------------------------------------------------------------------------------------------------------------------------------------------------------------------------------------------------------------------------------------------------------------------------------------------------------------------------------------------------------------------------------------------------------------------------------------------------------------------------------------------------------------------------------------------------------------|-------------------------------------------------------|
|            | UniProtKB=A0A0J9YX35,HUMAN Gene=HV309_HUMAN UniProtKB=P01782,HUMAN HGNC=5654 UniProtKB=P01825,HUMAN HGNC=5553 UniProtKB=A0A0A0MS14,HUMAN Gene=HV108_HUMAN UniProtKB=P0DP01,HUMAN HGNC=5624 UniProtKB=A0A0B4J1X5,HUMAN HGNC=5620 UniProtKB=P01780,HUMAN HGNC=5598 UniProtKB=A0A0C4DH35,HUMAN HGNC=14294 UniProtKB=Q9BYB0,HUMAN HGNC=603 UniProtKB=P04114,HUMAN HGNC=5580 UniProtKB=P01762,HUMAN HGNC=5633 UniProtKB=A0A075B7D8,HUMAN HGNC=5582 UniProtKB=A0A0B4J1V0,HUMAN HGNC=5478 UniProtKB=P01876,HUMAN HGNC=5617 UniProtKB=A0A075B6Q5,HUMAN HGNC=5594 UniProtKB=P0DP03,HUMAN HGNC=5655 UniProtKB=A0A0C4DH41,HUMAN HGNC=5636 UniProtKB=A0A075B7B8,HUMAN HGNC=5586 UniProtKB=A0A0B4J1V1,HUMAN HGNC=5581 UniProtKB=P01766,HUMAN HGNC=5622 UniProtKB=A0A0B4J1Y9,HUMAN HGNC=5652 UniProtKB=A0A075B6R2,HUMAN HGNC=5593 UniProtKB=P0DP02,HUMAN HGNC=5479 UniProtKB=P01877,HUMAN HGNC=5619 UniProtKB=A0A0C4DH42,HUMAN HGNC=5596 UniProtKB=P01772,HUMAN HGNC=13206 UniProtKB=O60296,HUMAN HGNC=5550 UniProtKB=P23083,HUMAN HGNC=5604 UniProtKB=A0A0B4J1X8,HUMAN HGNC=8078 UniProtKB=O95158,HUMAN HGNC=5525 UniProtKB=P01857,HUMAN HGNC=5662 UniProtKB=A0A0B4J1U7,HUMAN HGNC=5601 UniProtKB=A0A0C4DH36,HUMAN HGNC=5716 UniProtKB=P01834,HUMAN HGNC=5588 UniProtKB=P01764,HUMAN HGNC=5857 UniProtKB=P0DOY3,HUMAN HGNC=5610 UniProtKB=P01767,HUMAN HGNC=15588 UniProtKB=Q96C24,HUMAN Ensembl=ENSG00000282150 UniProtKB=A0A0J9YY99,HUMAN HGNC=5527 UniProtKB=P01860 |                                                       |
| GO:0051247 | HUMAN HGNC=6517 UniProtKB=P18428                                                                                                                                                                                                                                                                                                                                                                                                                                                                                                                                                                                                                                                                                                                                                                                                                                                                                                                                                                                                                                                                                                                                                                                                                                                                                                                                                                                                                          | positive regulation of protein metabolic process      |
| GO:0005885 | HUMAN HGNC=706 UniProtKB=O15145,HUMAN HGNC=705 UniProtKB=O15144,HUMAN HGNC=169 UniProtKB=P61160,HUMAN HGNC=704 UniProtKB=O15143,HUMAN HGNC=170 UniProtKB=P61158,HUMAN HGNC=708 UniProtKB=O15511                                                                                                                                                                                                                                                                                                                                                                                                                                                                                                                                                                                                                                                                                                                                                                                                                                                                                                                                                                                                                                                                                                                                                                                                                                                           | Arp2/3 protein complex protein O-linked glycosylation |
| GO:0006493 | HUMAN HGNC=8127 UniProtKB=O15294                                                                                                                                                                                                                                                                                                                                                                                                                                                                                                                                                                                                                                                                                                                                                                                                                                                                                                                                                                                                                                                                                                                                                                                                                                                                                                                                                                                                                          | regulation of RNA metabolic process                   |
| GO:0051252 | HUMAN HGNC=8648 UniProtKB=Q15366,HUMAN HGNC=8087 UniProtKB=P29728                                                                                                                                                                                                                                                                                                                                                                                                                                                                                                                                                                                                                                                                                                                                                                                                                                                                                                                                                                                                                                                                                                                                                                                                                                                                                                                                                                                         |                                                       |
| GO:0042592 | HUMAN HGNC=533 UniProtKB=P04083                                                                                                                                                                                                                                                                                                                                                                                                                                                                                                                                                                                                                                                                                                                                                                                                                                                                                                                                                                                                                                                                                                                                                                                                                                                                                                                                                                                                                           | homeostatic process                                   |
| GO:0006119 | HUMAN HGNC=8898 UniProtKB=P07205,HUMAN HGNC=2288 UniProtKB=P14406,HUMAN HGNC=830 UniProtKB=P06576,HUMAN HGNC=850 UniProtKB=P48047                                                                                                                                                                                                                                                                                                                                                                                                                                                                                                                                                                                                                                                                                                                                                                                                                                                                                                                                                                                                                                                                                                                                                                                                                                                                                                                         | oxidative phosphorylation                             |
| GO:0006397 | HUMAN HGNC=21605 UniProtKB=Q14151                                                                                                                                                                                                                                                                                                                                                                                                                                                                                                                                                                                                                                                                                                                                                                                                                                                                                                                                                                                                                                                                                                                                                                                                                                                                                                                                                                                                                         | mRNA processing                                       |
| GO:0032787 | HUMAN HGNC=253 UniProtKB=P11766,HUMAN HGNC=251 UniProtKB=P00326,HUMAN HGNC=6984 UniProtKB=P23368,HUMAN HGNC=255 UniProtKB=P28332,HUMAN HGNC=18144 UniProtKB=Q8IZU8                                                                                                                                                                                                                                                                                                                                                                                                                                                                                                                                                                                                                                                                                                                                                                                                                                                                                                                                                                                                                                                                                                                                                                                                                                                                                        | monocarboxylic acid metabolic process                 |
| GO:0006325 | HUMAN HGNC=5048 UniProtKB=Q00839                                                                                                                                                                                                                                                                                                                                                                                                                                                                                                                                                                                                                                                                                                                                                                                                                                                                                                                                                                                                                                                                                                                                                                                                                                                                                                                                                                                                                          | chromatin organization                                |
| GO:0006486 | HUMAN HGNC=10869 UniProtKB=Q92185                                                                                                                                                                                                                                                                                                                                                                                                                                                                                                                                                                                                                                                                                                                                                                                                                                                                                                                                                                                                                                                                                                                                                                                                                                                                                                                                                                                                                         | protein glycosylation                                 |

|            |                                                                                                                                                                                                                                                                                                                                                                                                                                                                                                                                                                                                                                                                                                                                                                                                                                                                                                                                                                                                                                                                                                                                                                                                                                                                                                                                                                                                                                                                                                                                                                                                                                                                                                                                                                                                                                                                                                                                                                                                                                                                                                                                                                                                                                                                                                                                                                                                                                                                                                                                                                                                                                                                                                                                                                                 |                                                                                                                                                                              |
|------------|---------------------------------------------------------------------------------------------------------------------------------------------------------------------------------------------------------------------------------------------------------------------------------------------------------------------------------------------------------------------------------------------------------------------------------------------------------------------------------------------------------------------------------------------------------------------------------------------------------------------------------------------------------------------------------------------------------------------------------------------------------------------------------------------------------------------------------------------------------------------------------------------------------------------------------------------------------------------------------------------------------------------------------------------------------------------------------------------------------------------------------------------------------------------------------------------------------------------------------------------------------------------------------------------------------------------------------------------------------------------------------------------------------------------------------------------------------------------------------------------------------------------------------------------------------------------------------------------------------------------------------------------------------------------------------------------------------------------------------------------------------------------------------------------------------------------------------------------------------------------------------------------------------------------------------------------------------------------------------------------------------------------------------------------------------------------------------------------------------------------------------------------------------------------------------------------------------------------------------------------------------------------------------------------------------------------------------------------------------------------------------------------------------------------------------------------------------------------------------------------------------------------------------------------------------------------------------------------------------------------------------------------------------------------------------------------------------------------------------------------------------------------------------|------------------------------------------------------------------------------------------------------------------------------------------------------------------------------|
| GO:0043168 | <p>HUMAN HGNC=12407 UniProtKB=P68366,HUMAN HGNC=654 UniProtKB=P61204,HUMAN HGNC=9391 UniProtKB=P13861,HUMAN HGNC=18756 UniProtKB=Q9BYZ6,HUMAN HGNC=9414 UniProtKB=Q13976,HUMAN HGNC=9862 UniProtKB=P61225,HUMAN HGNC=652 UniProtKB=P84077,HUMAN HGNC=12410 UniProtKB=Q9NY65,HUMAN HGNC=9380 UniProtKB=P17612,HUMAN HGNC=1834 UniProtKB=P29401,HUMAN HGNC=20778 UniProtKB=P07437,HUMAN HGNC=6407 UniProtKB=P01116,HUMAN HGNC=9392 UniProtKB=P31323,HUMAN HGNC=20766 UniProtKB=Q71U36,HUMAN HGNC=667 UniProtKB=P61586,HUMAN HGNC=4227 UniProtKB=P50395,HUMAN HGNC=4624 UniProtKB=P48637,HUMAN HGNC=9855 UniProtKB=P62834,HUMAN HGNC=659 UniProtKB=P62330,HUMAN HGNC=9840 UniProtKB=P11234,HUMAN HGNC=9723 UniProtKB=P11216,HUMAN HGNC=9381 UniProtKB=P22694,HUMAN HGNC=678 UniProtKB=P52565,HUMAN HGNC=692 UniProtKB=P40616,HUMAN HGNC=4226 UniProtKB=P31150,HUMAN HGNC=626 UniProtKB=P07741,HUMAN HGNC=9801 UniProtKB=P63000,HUMAN HGNC=669 UniProtKB=P08134,HUMAN HGNC=9857 UniProtKB=P61224,HUMAN HGNC=679 UniProtKB=P52566,HUMAN HGNC=20774 UniProtKB=P04350,HUMAN HGNC=10447 UniProtKB=P10301,HUMAN HGNC=11231 UniProtKB=Q8WXF7,HUMAN HGNC=658 UniProtKB=P84085,HUMAN HGNC=20771 UniProtKB=P68371,HUMAN HGNC=9725 UniProtKB=P06737,HUMAN HGNC=655 UniProtKB=P18085,HUMAN HGNC=24526 UniProtKB=Q6DD88,HUMAN HGNC=10011 UniProtKB=Q15382,HUMAN HGNC=9802 UniProtKB=P15153,HUMAN HGNC=1736 UniProtKB=P60953,HUMAN HGNC=16257 UniProtKB=Q9H4B7,HUMAN HGNC=2153 UniProtKB=Q9NQW8,HUMAN HGNC=9386 UniProtKB=Q9UGJ0,HUMAN HGNC=4234 UniProtKB=P55040</p> <p>HUMAN HGNC=11957 UniProtKB=Q93074,HUMAN HGNC=23708 UniProtKB=Q6ZR52,HUMAN HGNC=15935 UniProtKB=Q9H4I2,HUMAN HGNC=29084 UniProtKB=O75123,HUMAN HGNC=26427 UniProtKB=Q96ND8,HUMAN HGNC=51815 UniProtKB=A0A1W2PPM1,HUMAN HGNC=3815 UniProtKB=Q12951,HUMAN HGNC=11590 UniProtKB=Q16650,HUMAN HGNC=10475 UniProtKB=Q9Y230,HUMAN HGNC=33108 UniProtKB=Q6NX45,HUMAN HGNC=14008 UniProtKB=Q9BW11,HUMAN HGNC=13061 UniProtKB=Q14587,HUMAN HGNC=14010 UniProtKB=Q8IWI9,HUMAN HGNC=11364 UniProtKB=P40763,HUMAN HGNC=21605 UniProtKB=Q14151,HUMAN HGNC=6702 UniProtKB=Q32MZ4,HUMAN HGNC=10474 UniProtKB=Q9Y265,HUMAN HGNC=18807 UniProtKB=O94983,HUMAN HGNC=17801 UniProtKB=Q8NHY6,HUMAN HGNC=11594 UniProtKB=Q96SF7,HUMAN HGNC=31797 UniProtKB=P0C7V6,HUMAN HGNC=9459 UniProtKB=Q92786,HUMAN HGNC=13109 UniProtKB=P17038,HUMAN HGNC=9885 UniProtKB=P29374,HUMAN HGNC=5044 UniProtKB=P61978</p> <p>HUMAN HGNC=1623 UniProtKB=P50990,HUMAN HGNC=11655 UniProtKB=P17987,HUMAN HGNC=1618 UniProtKB=P48643,HUMAN HGNC=1620 UniProtKB=P40227,HUMAN HGNC=32153 UniProtKB=A6NM43,HUMAN HGNC=1615 UniProtKB=P78371</p> <p>HUMAN HGNC=11756 UniProtKB=Q03403,HUMAN HGNC=11828 UniProtKB=Q9UDY2</p> <p>HUMAN HGNC=23151 UniProtKB=Q86UX7</p> | <p>anion binding</p> <p>regulation of transcription by RNA polymerase II</p> <p>chaperonin-containing T-complex</p> <p>tissue homeostasis</p> <p>cell-substrate junction</p> |
|------------|---------------------------------------------------------------------------------------------------------------------------------------------------------------------------------------------------------------------------------------------------------------------------------------------------------------------------------------------------------------------------------------------------------------------------------------------------------------------------------------------------------------------------------------------------------------------------------------------------------------------------------------------------------------------------------------------------------------------------------------------------------------------------------------------------------------------------------------------------------------------------------------------------------------------------------------------------------------------------------------------------------------------------------------------------------------------------------------------------------------------------------------------------------------------------------------------------------------------------------------------------------------------------------------------------------------------------------------------------------------------------------------------------------------------------------------------------------------------------------------------------------------------------------------------------------------------------------------------------------------------------------------------------------------------------------------------------------------------------------------------------------------------------------------------------------------------------------------------------------------------------------------------------------------------------------------------------------------------------------------------------------------------------------------------------------------------------------------------------------------------------------------------------------------------------------------------------------------------------------------------------------------------------------------------------------------------------------------------------------------------------------------------------------------------------------------------------------------------------------------------------------------------------------------------------------------------------------------------------------------------------------------------------------------------------------------------------------------------------------------------------------------------------------|------------------------------------------------------------------------------------------------------------------------------------------------------------------------------|

|           |                                                                                                                                                                                                                                                                                                                                                                                                                                                                                                                                                                                                                                                                                                                                                                  |                                                    |
|-----------|------------------------------------------------------------------------------------------------------------------------------------------------------------------------------------------------------------------------------------------------------------------------------------------------------------------------------------------------------------------------------------------------------------------------------------------------------------------------------------------------------------------------------------------------------------------------------------------------------------------------------------------------------------------------------------------------------------------------------------------------------------------|----------------------------------------------------|
| PC00089   | HUMAN HGNC=7097 UniProtKB=P14174                                                                                                                                                                                                                                                                                                                                                                                                                                                                                                                                                                                                                                                                                                                                 | decarboxylase                                      |
| GO:190241 |                                                                                                                                                                                                                                                                                                                                                                                                                                                                                                                                                                                                                                                                                                                                                                  | protein localization to cell                       |
| 4         | HUMAN HGNC=11828 UniProtKB=Q9UDY2                                                                                                                                                                                                                                                                                                                                                                                                                                                                                                                                                                                                                                                                                                                                | junction                                           |
| GO:000721 |                                                                                                                                                                                                                                                                                                                                                                                                                                                                                                                                                                                                                                                                                                                                                                  | dopamine receptor                                  |
| 2         | HUMAN HGNC=4390 UniProtKB=P50148                                                                                                                                                                                                                                                                                                                                                                                                                                                                                                                                                                                                                                                                                                                                 | signaling pathway                                  |
| GO:007137 |                                                                                                                                                                                                                                                                                                                                                                                                                                                                                                                                                                                                                                                                                                                                                                  | cellular response to peptide                       |
| 5         | HUMAN HGNC=11364 UniProtKB=P40763                                                                                                                                                                                                                                                                                                                                                                                                                                                                                                                                                                                                                                                                                                                                | hormone stimulus                                   |
| GO:004348 | HUMAN HGNC=5046 UniProtKB=P52272,HUMAN HGNC=17150 UniProtKB=Q9Y2V2                                                                                                                                                                                                                                                                                                                                                                                                                                                                                                                                                                                                                                                                                               | regulation of mRNA stability                       |
| 8         |                                                                                                                                                                                                                                                                                                                                                                                                                                                                                                                                                                                                                                                                                                                                                                  | central nervous system                             |
| GO:002195 |                                                                                                                                                                                                                                                                                                                                                                                                                                                                                                                                                                                                                                                                                                                                                                  | neuron differentiation                             |
| 3         | HUMAN HGNC=11590 UniProtKB=Q16650                                                                                                                                                                                                                                                                                                                                                                                                                                                                                                                                                                                                                                                                                                                                | negative regulation of signal                      |
| GO:000996 | HUMAN HGNC=711 UniProtKB=P49407,HUMAN HGNC=29884 UniProtKB=Q8TF42,HUMAN HGNC=7178 UniProtKB=Q13201                                                                                                                                                                                                                                                                                                                                                                                                                                                                                                                                                                                                                                                               | transduction                                       |
| 8         | HUMAN HGNC=4226 UniProtKB=P31150,HUMAN HGNC=679 UniProtKB=P52566,HUMAN HGNC=17168 UniProtKB=Q9H2M9,HUMAN HGNC=4227 UniProtKB=P50395,HUMAN HGNC=678 UniProtKB=P52565                                                                                                                                                                                                                                                                                                                                                                                                                                                                                                                                                                                              | G-protein modulator                                |
| PC00022   |                                                                                                                                                                                                                                                                                                                                                                                                                                                                                                                                                                                                                                                                                                                                                                  |                                                    |
| GO:000470 |                                                                                                                                                                                                                                                                                                                                                                                                                                                                                                                                                                                                                                                                                                                                                                  | MAP kinase kinase activity                         |
| 8         | HUMAN HGNC=6840 UniProtKB=Q02750                                                                                                                                                                                                                                                                                                                                                                                                                                                                                                                                                                                                                                                                                                                                 |                                                    |
| GO:000581 | HUMAN HGNC=12401 UniProtKB=P33981,HUMAN HGNC=2092 UniProtKB=Q00610                                                                                                                                                                                                                                                                                                                                                                                                                                                                                                                                                                                                                                                                                               | spindle                                            |
| 9         |                                                                                                                                                                                                                                                                                                                                                                                                                                                                                                                                                                                                                                                                                                                                                                  |                                                    |
| GO:003033 |                                                                                                                                                                                                                                                                                                                                                                                                                                                                                                                                                                                                                                                                                                                                                                  | regulation of cell migration                       |
| 4         | HUMAN HGNC=11881 UniProtKB=P62328                                                                                                                                                                                                                                                                                                                                                                                                                                                                                                                                                                                                                                                                                                                                | voltage-gated calcium                              |
| GO:000524 | HUMAN HGNC=1406 UniProtKB=Q9Y698,HUMAN HGNC=1393 UniProtKB=O60840                                                                                                                                                                                                                                                                                                                                                                                                                                                                                                                                                                                                                                                                                                | channel activity                                   |
| 5         | HUMAN HGNC=9414 UniProtKB=Q13976,HUMAN HGNC=9406 UniProtKB=Q16513,HUMAN HGNC=12347 UniProtKB=Q9Y4A5,HUMAN HGNC=9380 UniProtKB=P17612,HUMAN HGNC=12401 UniProtKB=P33981,HUMAN HGNC=30765 UniProtKB=Q9UKE5,HUMAN HGNC=9395 UniProtKB=P05771,HUMAN HGNC=24224 UniProtKB=Q9NYV4,HUMAN HGNC=6840 UniProtKB=Q02750,HUMAN HGNC=18994 UniProtKB=Q8TDC3,HUMAN HGNC=6876 UniProtKB=Q16539,HUMAN HGNC=1459 UniProtKB=Q14012,HUMAN HGNC=11408 UniProtKB=Q13043,HUMAN HGNC=30410 UniProtKB=Q9BXA6,HUMAN HGNC=10252 UniProtKB=O75116,HUMAN HGNC=6871 UniProtKB=P28482,HUMAN HGNC=19825 UniProtKB=Q6S A08,HUMAN HGNC=9381 UniProtKB=P22694,HUMAN HGNC=6040 UniProtKB=Q13418,HUMAN HGNC=19286 UniProtKB=Q6P3W7,HUMAN HGNC=1745 UniProtKB=O00311,HUMAN HGNC=1738 UniProtKB=Q9Y5S2 | non-receptor<br>serine/threonine protein<br>kinase |
| PC00167   |                                                                                                                                                                                                                                                                                                                                                                                                                                                                                                                                                                                                                                                                                                                                                                  |                                                    |
| PC00177   | HUMAN HGNC=9604 UniProtKB=P23219                                                                                                                                                                                                                                                                                                                                                                                                                                                                                                                                                                                                                                                                                                                                 | oxygenase                                          |
| GO:001900 |                                                                                                                                                                                                                                                                                                                                                                                                                                                                                                                                                                                                                                                                                                                                                                  |                                                    |
| 5         | HUMAN HGNC=2552 UniProtKB=Q13617                                                                                                                                                                                                                                                                                                                                                                                                                                                                                                                                                                                                                                                                                                                                 | SCF ubiquitin ligase complex                       |
| GO:000669 |                                                                                                                                                                                                                                                                                                                                                                                                                                                                                                                                                                                                                                                                                                                                                                  | prostaglandin metabolic                            |
| 3         | HUMAN HGNC=533 UniProtKB=P04083                                                                                                                                                                                                                                                                                                                                                                                                                                                                                                                                                                                                                                                                                                                                  | process                                            |
|           | HUMAN HGNC=8876 UniProtKB=P17858,HUMAN HGNC=8905 UniProtKB=P36871,HUMAN HGNC=9021 UniProtKB=P14618,HUMAN HGNC=8878 UniProtKB=Q01813                                                                                                                                                                                                                                                                                                                                                                                                                                                                                                                                                                                                                              | intramolecular transferase                         |
| GO:001686 |                                                                                                                                                                                                                                                                                                                                                                                                                                                                                                                                                                                                                                                                                                                                                                  | activity                                           |
| 6         | HUMAN HGNC=3658 UniProtKB=Q9UGM5,HUMAN HGNC=14669 UniProtKB=P81605,HUMAN HGNC=7539 UniProtKB=Q9NR99                                                                                                                                                                                                                                                                                                                                                                                                                                                                                                                                                                                                                                                              | extracellular region                               |
| GO:000557 | HUMAN HGNC=18756 UniProtKB=Q9BYZ6,HUMAN HGNC=9802 UniProtKB=P15153,HUMAN HGNC=9253 UniProtKB=P62937,HUMAN HGNC=570 UniProtKB=P53677,HUMAN HGNC=575 UniProtKB=Q9Y2V2                                                                                                                                                                                                                                                                                                                                                                                                                                                                                                                                                                                              | intracellular membrane-<br>bounded organelle       |
| GO:004323 |                                                                                                                                                                                                                                                                                                                                                                                                                                                                                                                                                                                                                                                                                                                                                                  |                                                    |
| 1         |                                                                                                                                                                                                                                                                                                                                                                                                                                                                                                                                                                                                                                                                                                                                                                  |                                                    |

|           |                                                                                                                                                                                                         |                                                                     |
|-----------|---------------------------------------------------------------------------------------------------------------------------------------------------------------------------------------------------------|---------------------------------------------------------------------|
|           | B=Q9Y587,HUMAN HGNC=9801 UniProtKB=P63000,HUMAN HGNC=14637 UniProtKB=Q86UK0,HUMAN HGNC=13667 UniProtKB=Q9BXS5,HUMAN HGNC=9255 UniProtKB=P23284                                                          |                                                                     |
| GO:003085 |                                                                                                                                                                                                         | regulation of epithelial cell differentiation                       |
| 6         | HUMAN HGNC=243 UniProtKB=P35611                                                                                                                                                                         |                                                                     |
| GO:000470 | HUMAN HGNC=6871 UniProtKB=P28482,HUMAN HGNC=6840 UniProtKB=Q02750,HUMAN HGNC=6876 UniProtKB=Q16539                                                                                                      | MAP kinase activity                                                 |
| 7         |                                                                                                                                                                                                         |                                                                     |
| GO:000590 | HUMAN HGNC=11148 UniProtKB=Q16658,HUMAN HGNC=4381 UniProtKB=Q14344                                                                                                                                      | microvillus                                                         |
| 2         |                                                                                                                                                                                                         | protein transport along microtubule                                 |
| GO:009884 |                                                                                                                                                                                                         |                                                                     |
| 0         | HUMAN HGNC=6325 UniProtKB=O60282                                                                                                                                                                        |                                                                     |
|           | HUMAN HGNC=4045 UniProtKB=O75084,HUMAN HGNC=3616 UniProtKB=P12318,HUMAN HGNC=8823 UniProtKB=P16284,HUMAN HGNC=11119 UniProtKB=Q99835                                                                    | transmembrane signaling receptor activity                           |
| GO:000488 |                                                                                                                                                                                                         |                                                                     |
| 8         |                                                                                                                                                                                                         |                                                                     |
| GO:005120 | HUMAN HGNC=544 UniProtKB=P08133,HUMAN HGNC=29884 UniProtKB=Q8TF42                                                                                                                                       | sequestering of calcium ion                                         |
| 8         |                                                                                                                                                                                                         |                                                                     |
|           | HUMAN HGNC=28883 UniProtKB=Q9H2U2,HUMAN HGNC=8052 UniProtKB=Q9UKK9                                                                                                                                      | pyrophosphatase                                                     |
| PC00196   |                                                                                                                                                                                                         | nuclear-transcribed mRNA catabolic process, nonsense-mediated decay |
| GO:000018 | HUMAN HGNC=10898 UniProtKB=Q15477,HUMAN HGNC=17196 UniProtKB=Q8NG08                                                                                                                                     |                                                                     |
| 4         |                                                                                                                                                                                                         |                                                                     |
|           | HUMAN HGNC=23077 UniProtKB=Q96FW1,HUMAN HGNC=15912 UniProtKB=Q9UNZ2,HUMAN HGNC=16476 UniProtKB=Q9H0E2,HUMAN HGNC=24103 UniProtKB=Q9H1I8,HUMAN HGNC=9813 UniProtKB=P54727                                | ubiquitin binding                                                   |
| GO:004313 |                                                                                                                                                                                                         | cation transmembrane transport                                      |
| 0         |                                                                                                                                                                                                         |                                                                     |
| GO:009865 | HUMAN HGNC=1406 UniProtKB=Q9Y698,HUMAN HGNC=15474 UniProtKB=Q9Y566,HUMAN HGNC=14294 UniProtKB=Q9BYB0                                                                                                    | cellular amino acid catabolic process                               |
| 5         |                                                                                                                                                                                                         | regulation of actin polymerization or depolymerization              |
| GO:000906 | HUMAN HGNC=4433 UniProtKB=P00505,HUMAN HGNC=4335 UniProtKB=P00367                                                                                                                                       | mitochondrial protein complex                                       |
| 3         |                                                                                                                                                                                                         |                                                                     |
| GO:000806 |                                                                                                                                                                                                         |                                                                     |
| 4         | HUMAN HGNC=12754 UniProtKB=O75083                                                                                                                                                                       |                                                                     |
| GO:009879 | HUMAN HGNC=4801 UniProtKB=P40939,HUMAN HGNC=26022 UniProtKB=Q7L0Y3                                                                                                                                      |                                                                     |
| 8         |                                                                                                                                                                                                         |                                                                     |
|           | HUMAN HGNC=3338 UniProtKB=Q14247,HUMAN HGNC=2695 UniProtKB=Q16643,HUMAN HGNC=12754 UniProtKB=O75083,HUMAN HGNC=2696 UniProtKB=Q9UJU6,HUMAN HGNC=4844 UniProtKB=P14317,HUMAN HGNC=18304 UniProtKB=Q14019 | cortical actin cytoskeleton                                         |
| GO:003086 |                                                                                                                                                                                                         |                                                                     |
| 4         | HUMAN HGNC=15713 UniProtKB=Q9UJX4,HUMAN HGNC=9847 UniProtKB=P43487,HUMAN HGNC=5048 UniProtKB=Q00839,HUMAN HGNC=14452 UniProtKB=Q9NYG5                                                                   | positive regulation of mitotic nuclear division                     |
| GO:004584 |                                                                                                                                                                                                         |                                                                     |
| 0         | HUMAN HGNC=9240 UniProtKB=P02775,HUMAN HGNC=8862 UniProtKB=P10720,HUMAN HGNC=8861 UniProtKB=P02776                                                                                                      | chemokine                                                           |
| PC00074   |                                                                                                                                                                                                         | immune response-activating cell surface receptor signaling pathway  |
| GO:000242 |                                                                                                                                                                                                         |                                                                     |
| 9         | HUMAN HGNC=2444 UniProtKB=P41240                                                                                                                                                                        |                                                                     |
| GO:003013 |                                                                                                                                                                                                         |                                                                     |
| 7         | HUMAN HGNC=16998 UniProtKB=P49755                                                                                                                                                                       | COPI-coated vesicle                                                 |
| GO:001003 | HUMAN HGNC=2315 UniProtKB=Q96FN4,HUMAN HGNC=11510 UniProtKB=Q8N9I0,HUMAN HGNC=11512 UniProtKB=Q9H2B2                                                                                                    | response to metal ion                                               |
| 8         |                                                                                                                                                                                                         |                                                                     |
| GO:004690 | HUMAN HGNC=25951 UniProtKB=Q6ULP2,HUMAN HGNC=830 UniProtKB=P06576,HUMAN HGNC=850 UniProtKB=P48047                                                                                                       | intracellular transport                                             |
| 7         |                                                                                                                                                                                                         |                                                                     |
|           | HUMAN HGNC=6401 UniProtKB=Q92973,HUMAN HGNC=2431 UniProtKB=P55060,HUMAN HGNC=8062 UniProtKB=P49790,HUMAN HGNC=11512 UniProtKB=Q9H2B2                                                                    | transporter                                                         |
| PC00227   |                                                                                                                                                                                                         |                                                                     |

|            |                                                                                                                                                                                                                                                                                                                                                                                                                                                                                                                                                                                                                                                                                                                                                                                                                                                                                                                                                                                                                                                                                                                  |                                                         |
|------------|------------------------------------------------------------------------------------------------------------------------------------------------------------------------------------------------------------------------------------------------------------------------------------------------------------------------------------------------------------------------------------------------------------------------------------------------------------------------------------------------------------------------------------------------------------------------------------------------------------------------------------------------------------------------------------------------------------------------------------------------------------------------------------------------------------------------------------------------------------------------------------------------------------------------------------------------------------------------------------------------------------------------------------------------------------------------------------------------------------------|---------------------------------------------------------|
|            | N   HGNC=26801   UniProtKB=Q8N8Q8, HUMAN   HGNC=17103   UniProtKB=Q9Y5L0, HUMAN   HGNC=9852   UniProtKB=O95373, HUMAN   HGNC=30052   UniProtKB=Q8TEM1, HUMAN   HGNC=6396   UniProtKB=O00505, HUMAN   HGNC=568   UniProtKB=O14617, HUMAN   HGNC=6400   UniProtKB=Q14974                                                                                                                                                                                                                                                                                                                                                                                                                                                                                                                                                                                                                                                                                                                                                                                                                                           |                                                         |
| GO:0009790 | HUMAN   HGNC=7002   UniProtKB=A6NDR6, HUMAN   HGNC=30377   UniProtKB=Q14160                                                                                                                                                                                                                                                                                                                                                                                                                                                                                                                                                                                                                                                                                                                                                                                                                                                                                                                                                                                                                                      | embryo development                                      |
| GO:0031331 | HUMAN   HGNC=29190   UniProtKB=Q9UPQ9<br>HUMAN   HGNC=6156   UniProtKB=P05106, HUMAN   HGNC=19100   UniProtKB=Q5VWK5, HUMAN   HGNC=6153   UniProtKB=P05556, HUMAN   HGNC=4387   UniProtKB=P08754, HUMAN   HGNC=20731   UniProtKB=Q9HAV0, HUMAN   HGNC=3338   UniProtKB=Q14247, HUMAN   HGNC=15902   UniProtKB=Q8IXH8, HUMAN   HGNC=14265   UniProtKB=Q86UP0, HUMAN   HGNC=11168   UniProtKB=Q13884, HUMAN   HGNC=19747   UniProtKB=Q86UK5, HUMAN   HGNC=806   UniProtKB=P54709, HUMAN   HGNC=10594   UniProtKB=Q01118, HUMAN   HGNC=4393   UniProtKB=P11488, HUMAN   HGNC=3419   UniProtKB=P42566, HUMAN   HGNC=10582   UniProtKB=Q9Y5Y9, HUMAN   HGNC=561   UniProtKB=O95782, HUMAN   HGNC=6091   UniProtKB=P06213, HUMAN   HGNC=4395   UniProtKB=P19086, HUMAN   HGNC=3757   UniProtKB=O75955, HUMAN   HGNC=4384   UniProtKB=P63096, HUMAN   HGNC=4398   UniProtKB=P62879, HUMAN   HGNC=24634   UniProtKB=Q9UBC2, HUMAN   HGNC=4385   UniProtKB=P04899, HUMAN   HGNC=4390   UniProtKB=P50148, HUMAN   HGNC=4381   UniProtKB=Q14344, HUMAN   HGNC=6207   UniProtKB=P14923, HUMAN   HGNC=4396   UniProtKB=P62873 | positive regulation of cellular catabolic process       |
| GO:0098797 | HUMAN   HGNC=2367   UniProtKB=P02741, HUMAN   HGNC=584   UniProtKB=P02743                                                                                                                                                                                                                                                                                                                                                                                                                                                                                                                                                                                                                                                                                                                                                                                                                                                                                                                                                                                                                                        | plasma membrane protein complex                         |
| GO:0001848 | HUMAN   HGNC=14685   UniProtKB=Q9Y624, HUMAN   HGNC=2047   UniProtKB=O00501, HUMAN   HGNC=11828   UniProtKB=Q9UDY2                                                                                                                                                                                                                                                                                                                                                                                                                                                                                                                                                                                                                                                                                                                                                                                                                                                                                                                                                                                               | complement binding                                      |
| GO:0005923 | HUMAN   HGNC=30244   UniProtKB=Q6P1A2                                                                                                                                                                                                                                                                                                                                                                                                                                                                                                                                                                                                                                                                                                                                                                                                                                                                                                                                                                                                                                                                            | bicellular tight junction                               |
| GO:0046474 | HUMAN   HGNC=18587   UniProtKB=O94901, HUMAN   HGNC=2431   UniProtKB=P55060, HUMAN   HGNC=9852   UniProtKB=O95373                                                                                                                                                                                                                                                                                                                                                                                                                                                                                                                                                                                                                                                                                                                                                                                                                                                                                                                                                                                                | glycerophospholipid biosynthetic process                |
| GO:0005635 | HUMAN   HGNC=29884   UniProtKB=Q8TF42, HUMAN   HGNC=11283   UniProtKB=P12931                                                                                                                                                                                                                                                                                                                                                                                                                                                                                                                                                                                                                                                                                                                                                                                                                                                                                                                                                                                                                                     | nuclear envelope                                        |
| GO:0030316 | HUMAN   HGNC=2717   UniProtKB=Q16531                                                                                                                                                                                                                                                                                                                                                                                                                                                                                                                                                                                                                                                                                                                                                                                                                                                                                                                                                                                                                                                                             | osteoclast differentiation                              |
| GO:0003684 | HUMAN   HGNC=13531   UniProtKB=Q9Y2Q0                                                                                                                                                                                                                                                                                                                                                                                                                                                                                                                                                                                                                                                                                                                                                                                                                                                                                                                                                                                                                                                                            | damaged DNA binding                                     |
| GO:0140326 | HUMAN   HGNC=7618   UniProtKB=O14974<br>HUMAN   HGNC=9295   UniProtKB=Q15435, HUMAN   HGNC=1173   UniProtKB=Q5H9R7, HUMAN   HGNC=7618   UniProtKB=O14974, HUMAN   HGNC=9302   UniProtKB=P30153, HUMAN   HGNC=14871   UniProtKB=Q96A00, HUMAN   HGNC=14952   UniProtKB=Q8TAE6                                                                                                                                                                                                                                                                                                                                                                                                                                                                                                                                                                                                                                                                                                                                                                                                                                     | ATPase-coupled intramembrane lipid transporter activity |
| GO:0019208 | HUMAN   HGNC=3153   UniProtKB=Q16610<br>HUMAN   HGNC=9855   UniProtKB=P62834, HUMAN   HGNC=7641   UniProtKB=P54920, HUMAN   HGNC=11510   UniProtKB=Q8N9I0, HUMAN   HGNC=11131   UniProtKB=O00161, HUMAN   HGNC=9857   UniProtKB=P61224, HUMAN   HGNC=8515   UniProtKB=Q9HC10                                                                                                                                                                                                                                                                                                                                                                                                                                                                                                                                                                                                                                                                                                                                                                                                                                     | phosphatase regulator activity                          |
| PC00184    |                                                                                                                                                                                                                                                                                                                                                                                                                                                                                                                                                                                                                                                                                                                                                                                                                                                                                                                                                                                                                                                                                                                  | phosphatase modulator                                   |
| GO:0030278 |                                                                                                                                                                                                                                                                                                                                                                                                                                                                                                                                                                                                                                                                                                                                                                                                                                                                                                                                                                                                                                                                                                                  | regulation of ossification                              |
| GO:0016079 |                                                                                                                                                                                                                                                                                                                                                                                                                                                                                                                                                                                                                                                                                                                                                                                                                                                                                                                                                                                                                                                                                                                  | synaptic vesicle exocytosis                             |

|            |                                                                                                                                                                                                                                                                                                                                         |                                                   |
|------------|-----------------------------------------------------------------------------------------------------------------------------------------------------------------------------------------------------------------------------------------------------------------------------------------------------------------------------------------|---------------------------------------------------|
| GO:0044282 | HUMAN HGNC=8876 UniProtKB=P17858,HUMAN HGNC=253 UniProtKB=P11766,HUMAN HGNC=4116 UniProtKB=Q14376,HUMAN HGNC=24552 UniProtKB=Q3LXA3,HUMAN HGNC=12009 UniProtKB=P60174,HUMAN HGNC=8878 UniProtKB=Q01813,HUMAN HGNC=251 UniProtKB=P00326,HUMAN HGNC=6050 UniProtKB=P29218,HUMAN HGNC=613 UniProtKB=P02649,HUMAN HGNC=255 UniProtKB=P28332 | small molecule catabolic process                  |
| GO:0009057 | HUMAN HGNC=9723 UniProtKB=P11216,HUMAN HGNC=25153 UniProtKB=Q96EY5,HUMAN HGNC=9725 UniProtKB=P06737                                                                                                                                                                                                                                     | macromolecule catabolic process                   |
| GO:0065003 | HUMAN HGNC=23151 UniProtKB=Q86UX7,HUMAN HGNC=24526 UniProtKB=Q6DD88,HUMAN HGNC=30688 UniProtKB=Q86VP6,HUMAN HGNC=10534 UniProtKB=Q9NR31,HUMAN HGNC=11231 UniProtKB=Q8WXF7,HUMAN HGNC=11343 UniProtKB=P50502                                                                                                                             | protein-containing complex assembly               |
| GO:0006639 | HUMAN HGNC=2850 UniProtKB=Q9Y6T7                                                                                                                                                                                                                                                                                                        | acylglycerol metabolic process                    |
| GO:0061041 | HUMAN HGNC=11491 UniProtKB=P43405                                                                                                                                                                                                                                                                                                       | regulation of wound healing                       |
| GO:0043086 | HUMAN HGNC=237 UniProtKB=O43306                                                                                                                                                                                                                                                                                                         | negative regulation of catalytic activity         |
| GO:0050852 | HUMAN HGNC=6171 UniProtKB=Q08881,HUMAN HGNC=4036 UniProtKB=O15117,HUMAN HGNC=4037 UniProtKB=P06241,HUMAN HGNC=16961 UniProtKB=Q15762                                                                                                                                                                                                    | T cell receptor signaling pathway                 |
| GO:0042063 | HUMAN HGNC=533 UniProtKB=P04083                                                                                                                                                                                                                                                                                                         | gliogenesis                                       |
| GO:0045765 | HUMAN HGNC=7178 UniProtKB=Q13201                                                                                                                                                                                                                                                                                                        | regulation of angiogenesis                        |
| GO:0016575 | HUMAN HGNC=9349 UniProtKB=Q9NQX1                                                                                                                                                                                                                                                                                                        | histone deacetylation                             |
| PC00216    | HUMAN HGNC=4432 UniProtKB=P17174,HUMAN HGNC=4242 UniProtKB=O94808,HUMAN HGNC=4433 UniProtKB=P00505                                                                                                                                                                                                                                      | transaminase                                      |
| GO:0030479 | HUMAN HGNC=15750 UniProtKB=P60981,HUMAN HGNC=1874 UniProtKB=P23528,HUMAN HGNC=169 UniProtKB=P61160,HUMAN HGNC=1488 UniProtKB=P52907,HUMAN HGNC=4374 UniProtKB=O60234,HUMAN HGNC=170 UniProtKB=P61158                                                                                                                                    | actin cortical patch                              |
| GO:0016070 | HUMAN HGNC=8648 UniProtKB=Q15366                                                                                                                                                                                                                                                                                                        | RNA metabolic process                             |
| GO:0051962 | HUMAN HGNC=2479 UniProtKB=O76096                                                                                                                                                                                                                                                                                                        | positive regulation of nervous system development |
| GO:0005774 | HUMAN HGNC=7641 UniProtKB=P54920,HUMAN HGNC=851 UniProtKB=P38606                                                                                                                                                                                                                                                                        | vacuolar membrane                                 |
| GO:0005544 | HUMAN HGNC=2315 UniProtKB=Q96FN4,HUMAN HGNC=11510 UniProtKB=Q8N9I0,HUMAN HGNC=544 UniProtKB=P08133,HUMAN HGNC=533 UniProtKB=P04083,HUMAN HGNC=11512 UniProtKB=Q9H2B2                                                                                                                                                                    | calcium-dependent phospholipid binding            |
| GO:0036064 | HUMAN HGNC=30391 UniProtKB=Q9UG01,HUMAN HGNC=26555 UniProtKB=Q3SY00,HUMAN HGNC=20908 UniProtKB=Q86YF9                                                                                                                                                                                                                                   | ciliary basal body                                |
| GO:0030199 | HUMAN HGNC=3011 UniProtKB=Q07507,HUMAN HGNC=2209 UniProtKB=P20908,HUMAN HGNC=1546 UniProtKB=P50454                                                                                                                                                                                                                                      | collagen fibril organization                      |
| GO:0072659 | HUMAN HGNC=31332 UniProtKB=Q6IQ22,HUMAN HGNC=7007 UniProtKB=P61006,HUMAN HGNC=3757 UniProtKB=O75955,HUMAN HGNC=4036 UniProtKB=O15117,HUMAN HGNC=30032 UniProtKB=Q6VY07,HUMAN HGNC=9778 UniProtKB=P20337,HUMAN                                                                                                                           | protein localization to plasma membrane           |

|            |                                                                                                                                                                                                                                                                                                                                                                                                                                                                                                                                                                                                                                                                                                                                                                                                                                                                                                                                                                                                                                                                                                                                                                                                                                                                                                                                                                                                                                                                                                     |                                       |
|------------|-----------------------------------------------------------------------------------------------------------------------------------------------------------------------------------------------------------------------------------------------------------------------------------------------------------------------------------------------------------------------------------------------------------------------------------------------------------------------------------------------------------------------------------------------------------------------------------------------------------------------------------------------------------------------------------------------------------------------------------------------------------------------------------------------------------------------------------------------------------------------------------------------------------------------------------------------------------------------------------------------------------------------------------------------------------------------------------------------------------------------------------------------------------------------------------------------------------------------------------------------------------------------------------------------------------------------------------------------------------------------------------------------------------------------------------------------------------------------------------------------------|---------------------------------------|
| GO:0000502 | HGNC=3244 UniProtKB=Q9NZN3,HUMAN HGNC=11075 UniProtKB=O14745,HUMAN HGNC=492 UniProtKB=P16157<br>HUMAN HGNC=9539 UniProtKB=P49721,HUMAN HGNC=9545 UniProtKB=P28062,HUMAN HGNC=9540 UniProtKB=P49720,HUMAN HGNC=9565 UniProtKB=P51665,HUMAN HGNC=9537 UniProtKB=P20618<br>HUMAN HGNC=992 UniProtKB=Q07817,HUMAN HGNC=12669 UniProtKB=P21796,HUMAN HGNC=12674 UniProtKB=Q9Y277,HUMAN HGNC=12672 UniProtKB=P45880                                                                                                                                                                                                                                                                                                                                                                                                                                                                                                                                                                                                                                                                                                                                                                                                                                                                                                                                                                                                                                                                                       | proteasome complex                    |
| GO:0005741 |                                                                                                                                                                                                                                                                                                                                                                                                                                                                                                                                                                                                                                                                                                                                                                                                                                                                                                                                                                                                                                                                                                                                                                                                                                                                                                                                                                                                                                                                                                     | mitochondrial outer membrane          |
| GO:0034204 | HUMAN HGNC=30220 UniProtKB=Q96AA3                                                                                                                                                                                                                                                                                                                                                                                                                                                                                                                                                                                                                                                                                                                                                                                                                                                                                                                                                                                                                                                                                                                                                                                                                                                                                                                                                                                                                                                                   | lipid translocation                   |
| GO:0046456 | HUMAN HGNC=533 UniProtKB=P04083<br>HUMAN HGNC=2949 UniProtKB=Q8TD57,HUMAN HGNC=7007 UniProtKB=P61006,HUMAN HGNC=26555 UniProtKB=Q3SY00,HUMAN HGNC=12733 UniProtKB=Q9Y6W5,HUMAN HGNC=14653 UniProtKB=Q9HBI1,HUMAN HGNC=667 UniProtKB=P61586,HUMAN HGNC=11320 UniProtKB=Q8IZP0,HUMAN HGNC=492 UniProtKB=P16157,HUMAN HGNC=14313 UniProtKB=Q8WYA0,HUMAN HGNC=19296 UniProtKB=Q9UF33,HUMAN HGNC=14906 UniProtKB=Q8N4C6,HUMAN HGNC=29557 UniProtKB=Q0ZGT2,HUMAN HGNC=10594 UniProtKB=Q01118,HUMAN HGNC=11138 UniProtKB=P37840,HUMAN HGNC=10582 UniProtKB=Q9Y5Y9,HUMAN HGNC=11512 UniProtKB=Q9H2B2,HUMAN HGNC=6091 UniProtKB=P06213,HUMAN HGNC=29262 UniProtKB=Q9P2H3,HUMAN HGNC=1117 UniProtKB=Q9UPA5,HUMAN HGNC=13206 UniProtKB=O60296,HUMAN HGNC=11424 UniProtKB=O43815,HUMAN HGNC=199 UniProtKB=O43506,HUMAN HGNC=7641 UniProtKB=P54920,HUMAN HGNC=12690 UniProtKB=P09327,HUMAN HGNC=9801 UniProtKB=P63000,HUMAN HGNC=6835 UniProtKB=P78559,HUMAN HGNC=6510 UniProtKB=P16949,HUMAN HGNC=13406 UniProtKB=Q9Y6V0,HUMAN HGNC=11119 UniProtKB=Q99835,HUMAN HGNC=17060 UniProtKB=Q92845,HUMAN HGNC=8898 UniProtKB=P07205,HUMAN HGNC=30391 UniProtKB=Q9UG01,HUMAN HGNC=17780 UniProtKB=Q562R1,HUMAN HGNC=29943 UniProtKB=Q9NT68,HUMAN HGNC=15720 UniProtKB=Q13033,HUMAN HGNC=20908 UniProtKB=Q86YF9,HUMAN HGNC=1736 UniProtKB=P60953,HUMAN HGNC=2952 UniProtKB=Q96JB1,HUMAN HGNC=6317 UniProtKB=O43896,HUMAN HGNC=7590 UniProtKB=Q15746,HUMAN HGNC=11510 UniProtKB=Q8N9I0,HUMAN HGNC=26664 UniProtKB=Q8N841 | icosanoid biosynthetic process        |
| GO:0098590 |                                                                                                                                                                                                                                                                                                                                                                                                                                                                                                                                                                                                                                                                                                                                                                                                                                                                                                                                                                                                                                                                                                                                                                                                                                                                                                                                                                                                                                                                                                     | plasma membrane region                |
| GO:0017119 | HUMAN HGNC=18621 UniProtKB=Q9Y2V7                                                                                                                                                                                                                                                                                                                                                                                                                                                                                                                                                                                                                                                                                                                                                                                                                                                                                                                                                                                                                                                                                                                                                                                                                                                                                                                                                                                                                                                                   | Golgi transport complex               |
| GO:0008219 | HUMAN HGNC=5141 UniProtKB=P00738,HUMAN HGNC=5156 UniProtKB=P00739                                                                                                                                                                                                                                                                                                                                                                                                                                                                                                                                                                                                                                                                                                                                                                                                                                                                                                                                                                                                                                                                                                                                                                                                                                                                                                                                                                                                                                   | cell death                            |
| GO:0015101 | HUMAN HGNC=17292 UniProtKB=Q8IWA5                                                                                                                                                                                                                                                                                                                                                                                                                                                                                                                                                                                                                                                                                                                                                                                                                                                                                                                                                                                                                                                                                                                                                                                                                                                                                                                                                                                                                                                                   | organic cation                        |
| GO:0000054 | HUMAN HGNC=9846 UniProtKB=P62826,HUMAN HGNC=7910 UniProtKB=P06748                                                                                                                                                                                                                                                                                                                                                                                                                                                                                                                                                                                                                                                                                                                                                                                                                                                                                                                                                                                                                                                                                                                                                                                                                                                                                                                                                                                                                                   | transmembrane transporter activity    |
| GO:0043409 | HUMAN HGNC=8630 UniProtKB=P30086                                                                                                                                                                                                                                                                                                                                                                                                                                                                                                                                                                                                                                                                                                                                                                                                                                                                                                                                                                                                                                                                                                                                                                                                                                                                                                                                                                                                                                                                    | ribosomal subunit export from nucleus |
| GO:0048608 | HUMAN HGNC=533 UniProtKB=P04083                                                                                                                                                                                                                                                                                                                                                                                                                                                                                                                                                                                                                                                                                                                                                                                                                                                                                                                                                                                                                                                                                                                                                                                                                                                                                                                                                                                                                                                                     | negative regulation of MAPK cascade   |
|            |                                                                                                                                                                                                                                                                                                                                                                                                                                                                                                                                                                                                                                                                                                                                                                                                                                                                                                                                                                                                                                                                                                                                                                                                                                                                                                                                                                                                                                                                                                     | reproductive structure development    |

|           |                                                        |                             |
|-----------|--------------------------------------------------------|-----------------------------|
| GO:009743 | HUMAN HGNC=3602 UniProtKB=Q9UBX5,HUMAN HGNC=15855      | supramolecular fiber        |
| 5         | UniProtKB=Q9NPY3                                       | organization                |
| GO:000014 | HUMAN HGNC=20120 UniProtKB=Q17RC7,HUMAN HGNC=30389     |                             |
| 5         | UniProtKB=Q96A65                                       | exocyst                     |
| GO:000806 |                                                        |                             |
| 6         | HUMAN HGNC=16768 UniProtKB=O60391                      | glutamate receptor activity |
|           | HUMAN HGNC=5575 UniProtKB=A0A0B4J1V2,HUMAN HGNC=56     |                             |
|           | 45 UniProtKB=A0A0C4DH34,HUMAN HGNC=5549 UniProtKB=A0   |                             |
|           | A0C4DH31,HUMAN HGNC=11092 UniProtKB=P03973,HUMAN HG    |                             |
|           | NC=5554 UniProtKB=P01743,HUMAN HGNC=5480 UniProtKB=P0  |                             |
|           | 1880,HUMAN HGNC=5659 UniProtKB=A0A0C4DH38,HUMAN HG     |                             |
|           | NC=5634 UniProtKB=A0A075B7F0,HUMAN HGNC=12841 UniProt  |                             |
|           | KB=P07947,HUMAN HGNC=11283 UniProtKB=P12931,HUMAN H    |                             |
|           | GNC=6735 UniProtKB=P07948,HUMAN HGNC=27146 UniProtKB=  |                             |
|           | Q5TA31,HUMAN HGNC=38476 UniProtKB=B9A064,HUMAN HGN     |                             |
|           | C=4037 UniProtKB=P06241,HUMAN HGNC=1472 UniProtKB=P49  |                             |
|           | 913,HUMAN HGNC=5861 UniProtKB=A0M8Q6,HUMAN HGNC=56     |                             |
|           | 47 UniProtKB=A0A087WSY4,HUMAN HGNC=5563 UniProtKB=A0   |                             |
|           | A075B7D0,HUMAN HGNC=5856 UniProtKB=P0DOY2,HUMAN HG     |                             |
|           | NC=2367 UniProtKB=P02741,HUMAN HGNC=5606 UniProtKB=P0  |                             |
|           | 1763,HUMAN HGNC=5576 UniProtKB=P01817,HUMAN HGNC=55    |                             |
|           | 28 UniProtKB=P01861,HUMAN HGNC=5541 UniProtKB=P01871,H |                             |
|           | UMAN HGNC=5585 UniProtKB=A0A0C4DH32,HUMAN HGNC=555     |                             |
|           | 1 UniProtKB=A0A0C4DH33,HUMAN HGNC=5526 UniProtKB=P018  |                             |
|           | 59,HUMAN HGNC=5657 UniProtKB=P0DP08,HUMAN Ensembl=E    |                             |
|           | NSG00000282639 UniProtKB=A0A0J9YX35,HUMAN Gene=HV309_  |                             |
|           | HUMAN UniProtKB=P01782,HUMAN HGNC=5654 UniProtKB=P01   |                             |
|           | 825,HUMAN HGNC=5553 UniProtKB=A0A0A0MS14,HUMAN HGN     |                             |
|           | C=7183 UniProtKB=P41218,HUMAN Gene=HV108_HUMAN UniPr   |                             |
|           | otKB=P0DP01,HUMAN HGNC=5624 UniProtKB=A0A0B4J1X5,HUM   |                             |
|           | AN HGNC=5620 UniProtKB=P01780,HUMAN HGNC=5598 UniProt  |                             |
|           | KB=A0A0C4DH35,HUMAN HGNC=5580 UniProtKB=P01762,HUMA    |                             |
|           | N HGNC=5633 UniProtKB=A0A075B7D8,HUMAN HGNC=5582 Uni   |                             |
|           | ProtKB=A0A0B4J1V0,HUMAN HGNC=5478 UniProtKB=P01876,HU  |                             |
|           | MAN HGNC=5617 UniProtKB=A0A075B6Q5,HUMAN HGNC=5594     |                             |
|           | UniProtKB=P0DP03,HUMAN HGNC=5655 UniProtKB=A0A0C4DH4   |                             |
|           | 1,HUMAN HGNC=5636 UniProtKB=A0A075B7B8,HUMAN HGNC=     |                             |
|           | 5586 UniProtKB=A0A0B4J1V1,HUMAN HGNC=5581 UniProtKB=P  |                             |
|           | 01766,HUMAN HGNC=5622 UniProtKB=A0A0B4J1Y9,HUMAN HG    |                             |
|           | NC=5652 UniProtKB=A0A075B6R2,HUMAN HGNC=5593 UniProtK  |                             |
|           | B=P0DP02,HUMAN HGNC=6517 UniProtKB=P18428,HUMAN HGN    |                             |
|           | C=10046 UniProtKB=P12724,HUMAN HGNC=5479 UniProtKB=P0  |                             |
|           | 1877,HUMAN HGNC=5619 UniProtKB=A0A0C4DH42,HUMAN HG     |                             |
|           | NC=5596 UniProtKB=P01772,HUMAN HGNC=5550 UniProtKB=P2  |                             |
|           | 3083,HUMAN HGNC=5604 UniProtKB=A0A0B4J1X8,HUMAN HGN    |                             |
|           | C=5525 UniProtKB=P01857,HUMAN HGNC=2761 UniProtKB=P59  |                             |
|           | 665,HUMAN HGNC=10632 UniProtKB=P13501,HUMAN HGNC=56    |                             |
|           | 62 UniProtKB=A0A0B4J1U7,HUMAN HGNC=16961 UniProtKB=Q1  |                             |
|           | 5762,HUMAN HGNC=5601 UniProtKB=A0A0C4DH36,HUMAN HG     |                             |
|           | NC=5716 UniProtKB=P01834,HUMAN HGNC=5588 UniProtKB=P0  |                             |
|           | 1764,HUMAN HGNC=5857 UniProtKB=P0DOY3,HUMAN HGNC=5     |                             |
| GO:004508 | 610 UniProtKB=P01767,HUMAN Ensembl=ENSG00000282150 Uni |                             |
| 7         | ProtKB=A0A0J9YY99,HUMAN HGNC=5527 UniProtKB=P01860,HU  | innate immune response      |

|            |                                                                                                                                                                                                                                                                                                                                                                                                                                                                                                                                                                                                                                                                                                                                                                                                                                                                                                                                                                                                                                                                                                                                                                                                                                                                                          |                                                                          |
|------------|------------------------------------------------------------------------------------------------------------------------------------------------------------------------------------------------------------------------------------------------------------------------------------------------------------------------------------------------------------------------------------------------------------------------------------------------------------------------------------------------------------------------------------------------------------------------------------------------------------------------------------------------------------------------------------------------------------------------------------------------------------------------------------------------------------------------------------------------------------------------------------------------------------------------------------------------------------------------------------------------------------------------------------------------------------------------------------------------------------------------------------------------------------------------------------------------------------------------------------------------------------------------------------------|--------------------------------------------------------------------------|
|            | MAN HGNC=584 UniProtKB=P02743,HUMAN HGNC=10045 UniProtKB=P10153                                                                                                                                                                                                                                                                                                                                                                                                                                                                                                                                                                                                                                                                                                                                                                                                                                                                                                                                                                                                                                                                                                                                                                                                                          |                                                                          |
| GO:0043113 | HUMAN HGNC=30377 UniProtKB=Q14160<br>HUMAN HGNC=654 UniProtKB=P61204,HUMAN HGNC=652 UniProtKB=P84077,HUMAN HGNC=9784 UniProtKB=P61020,HUMAN HGNC=14902 UniProtKB=Q9NRW1,HUMAN HGNC=19983 UniProtKB=Q86YS6,HUMAN HGNC=12666 UniProtKB=P55072,HUMAN HGNC=13487 UniProtKB=Q96QK1,HUMAN HGNC=16524 UniProtKB=P61106,HUMAN HGNC=20726 UniProtKB=Q8WVM8,HUMAN HGNC=11445 UniProtKB=Q15833,HUMAN HGNC=9758 UniProtKB=P62820,HUMAN HGNC=16998 UniProtKB=P49755,HUMAN HGNC=659 UniProtKB=P62330,HUMAN HGNC=2232 UniProtKB=P35606,HUMAN HGNC=18263 UniProtKB=Q9UL25,HUMAN HGNC=692 UniProtKB=P40616,HUMAN HGNC=9785 UniProtKB=P51148,HUMAN HGNC=2230 UniProtKB=P53621,HUMAN HGNC=7641 UniProtKB=P54920,HUMAN HGNC=26801 UniProtKB=Q8N8Q8,HUMAN HGNC=9772 UniProtKB=Q13637,HUMAN HGNC=21354 UniProtKB=Q86XR7,HUMAN HGNC=24251 UniProtKB=Q9Y3A6,HUMAN HGNC=658 UniProtKB=P84085,HUMAN HGNC=655 UniProtKB=P18085,HUMAN HGNC=11446 UniProtKB=O00186,HUMAN HGNC=25694 UniProtKB=Q8TC07,HUMAN HGNC=9786 UniProtKB=P20340,HUMAN HGNC=11442 UniProtKB=O15400,HUMAN HGNC=11429 UniProtKB=O75558,HUMAN HGNC=10534 UniProtKB=Q9NR31,HUMAN HGNC=20347 UniProtKB=Q9H9C1,HUMAN HGNC=18370 UniProtKB=Q9H0U4,HUMAN HGNC=16996 UniProtKB=Q15363,HUMAN HGNC=25571 UniProtKB=Q9NVG8,HUMAN HGNC=24878 UniProtKB=Q9BVK6 | receptor clustering                                                      |
| GO:0006886 |                                                                                                                                                                                                                                                                                                                                                                                                                                                                                                                                                                                                                                                                                                                                                                                                                                                                                                                                                                                                                                                                                                                                                                                                                                                                                          | intracellular protein transport                                          |
| GO:0051495 | HUMAN HGNC=12754 UniProtKB=O75083,HUMAN HGNC=8881 UniProtKB=P07737,HUMAN HGNC=9847 UniProtKB=P43487<br>HUMAN HGNC=20040 UniProtKB=Q01518,HUMAN HGNC=2067 UniProtKB=O00151,HUMAN HGNC=8881 UniProtKB=P07737,HUMAN HGNC=17468 UniProtKB=Q96HC4,HUMAN HGNC=6835 UniProtKB=P78559,HUMAN HGNC=14653 UniProtKB=Q9HBI1,HUMAN HGNC=22958 UniProtKB=Q9NR12,HUMAN HGNC=21295 UniProtKB=Q8TE68                                                                                                                                                                                                                                                                                                                                                                                                                                                                                                                                                                                                                                                                                                                                                                                                                                                                                                      | positive regulation of cytoskeleton organization                         |
| GO:0003779 | HUMAN HGNC=6767 UniProtKB=Q15797,HUMAN HGNC=13109 UniProtKB=P17038,HUMAN HGNC=13061 UniProtKB=Q14587,HUMAN HGNC=23708 UniProtKB=Q6ZR52,HUMAN HGNC=7002 UniProtKB=A6NDR6                                                                                                                                                                                                                                                                                                                                                                                                                                                                                                                                                                                                                                                                                                                                                                                                                                                                                                                                                                                                                                                                                                                  | actin binding                                                            |
| GO:0001228 | HUMAN HGNC=7183 UniProtKB=P41218,HUMAN HGNC=4716 UniProtKB=P16403,HUMAN HGNC=4718 UniProtKB=P10412,HUMAN HGNC=18807 UniProtKB=O94983,HUMAN HGNC=4719 UniProtKB=P16401                                                                                                                                                                                                                                                                                                                                                                                                                                                                                                                                                                                                                                                                                                                                                                                                                                                                                                                                                                                                                                                                                                                    | DNA-binding transcription activator activity, RNA polymerase II-specific |
| GO:0003690 | HUMAN HGNC=27146 UniProtKB=Q5TA31,HUMAN HGNC=12458 UniProtKB=P62987,HUMAN HGNC=12468 UniProtKB=P0CG48,HUMAN HGNC=12469 UniProtKB=P22314,HUMAN HGNC=30688 UniProtKB=Q86VP6,HUMAN HGNC=2552 UniProtKB=Q13617,HUMAN HGNC=14452 UniProtKB=Q9NYG5,HUMAN HGNC=2551 UniProtKB=Q13616,HUMAN HGNC=7732 UniProtKB=Q15843,HUMAN HGNC=26378 UniProtKB=Q8N7C3,HUMAN HGNC=25544 UniProtKB=Q9HCI7,HUMAN HGNC=12463 UniProtKB=P0CG47                                                                                                                                                                                                                                                                                                                                                                                                                                                                                                                                                                                                                                                                                                                                                                                                                                                                     | double-stranded DNA binding                                              |
| GO:0016567 |                                                                                                                                                                                                                                                                                                                                                                                                                                                                                                                                                                                                                                                                                                                                                                                                                                                                                                                                                                                                                                                                                                                                                                                                                                                                                          | protein ubiquitination                                                   |

|            |                                                                                                                                                                                                                                                                                                                                                 |                                                                                 |
|------------|-------------------------------------------------------------------------------------------------------------------------------------------------------------------------------------------------------------------------------------------------------------------------------------------------------------------------------------------------|---------------------------------------------------------------------------------|
| GO:0051603 | HUMAN HGNC=2528 UniProtKB=P53634,HUMAN HGNC=5381 UniProtKB=P14735,HUMAN HGNC=9472 UniProtKB=Q99538                                                                                                                                                                                                                                              | proteolysis involved in cellular protein catabolic process                      |
| GO:0016772 | HUMAN HGNC=9465 UniProtKB=P11908,HUMAN HGNC=9462 UniProtKB=P60891<br>HUMAN HGNC=3338 UniProtKB=Q14247,HUMAN HGNC=15474 UniProtKB=Q9Y566,HUMAN HGNC=2695 UniProtKB=Q16643,HUMAN HGNC=2974 UniProtKB=P50570,HUMAN HGNC=29125 UniProtKB=Q9UQ16,HUMAN HGNC=2696 UniProtKB=Q9UJU6,HUMAN HGNC=4844 UniProtKB=P14317,HUMAN HGNC=14294 UniProtKB=Q9BYB0 | transferase activity, transferring phosphorus-containing groups                 |
| GO:0045211 | HUMAN HGNC=12028 UniProtKB=P14625,HUMAN HGNC=13919 UniProtKB=P46379,HUMAN HGNC=12666 UniProtKB=P55072,HUMAN HGNC=30550 UniProtKB=O60337,HUMAN HGNC=5238 UniProtKB=P11021,HUMAN HGNC=9553 UniProtKB=P62333,HUMAN HGNC=25035 UniProtKB=Q5VVQ6,HUMAN HGNC=17943 UniProtKB=Q9GZP9                                                                   | postsynaptic membrane                                                           |
| GO:0030433 | HUMAN HGNC=2528 UniProtKB=P53634,HUMAN HGNC=1476 UniProtKB=P07384,HUMAN HGNC=20063 UniProtKB=Q86T82,HUMAN HGNC=12628 UniProtKB=P45974,HUMAN HGNC=9472 UniProtKB=Q99538,HUMAN HGNC=13485 UniProtKB=Q9BXU7,HUMAN HGNC=20076 UniProtKB=Q96K76                                                                                                      | ubiquitin-dependent ERAD pathway                                                |
| GO:0004197 | HUMAN HGNC=15578 UniProtKB=Q96D71,HUMAN HGNC=24634 UniProtKB=Q9UBC2,HUMAN HGNC=3419 UniProtKB=P42566                                                                                                                                                                                                                                            | cysteine-type endopeptidase activity                                            |
| GO:0016197 |                                                                                                                                                                                                                                                                                                                                                 | endosomal transport                                                             |
| GO:0030894 | HUMAN HGNC=26200 UniProtKB=Q9H668                                                                                                                                                                                                                                                                                                               | replisome                                                                       |
| GO:0051241 | HUMAN HGNC=607 UniProtKB=P02654,HUMAN HGNC=533 UniProtKB=P04083,HUMAN HGNC=29884 UniProtKB=Q8TF42,HUMAN HGNC=7178 UniProtKB=Q13201                                                                                                                                                                                                              | negative regulation of multicellular organismal process                         |
| GO:0030120 | HUMAN HGNC=10534 UniProtKB=Q9NR31,HUMAN HGNC=10701 UniProtKB=Q15436                                                                                                                                                                                                                                                                             | vesicle coat                                                                    |
| GO:0061640 | HUMAN HGNC=15848 UniProtKB=Q14141,HUMAN HGNC=2713 UniProtKB=O75935,HUMAN HGNC=9164 UniProtKB=Q99719,HUMAN HGNC=1717 UniProtKB=Q16181,HUMAN HGNC=7729 UniProtKB=Q15019                                                                                                                                                                           | cytoskeleton-dependent cytokinesis                                              |
| GO:0022409 | HUMAN HGNC=3757 UniProtKB=O75955                                                                                                                                                                                                                                                                                                                | positive regulation of cell-cell adhesion                                       |
| GO:0033202 | HUMAN HGNC=26200 UniProtKB=Q9H668                                                                                                                                                                                                                                                                                                               | DNA helicase complex                                                            |
| GO:0052745 | HUMAN HGNC=6050 UniProtKB=P29218                                                                                                                                                                                                                                                                                                                | inositol phosphate phosphatase activity                                         |
| GO:0000977 | HUMAN HGNC=7803 UniProtKB=Q12986,HUMAN HGNC=25397 UniProtKB=Q6MZP7,HUMAN HGNC=9349 UniProtKB=Q9NQX1,HUMAN HGNC=15935 UniProtKB=Q9H4I2,HUMAN HGNC=7446 UniProtKB=Q9Y4I5,HUMAN HGNC=12879 UniProtKB=P21506                                                                                                                                        | RNA polymerase II transcription regulatory region sequence-specific DNA binding |
| GO:0050877 | HUMAN HGNC=1406 UniProtKB=Q9Y698,HUMAN HGNC=2479 UniProtKB=O76096,HUMAN HGNC=10594 UniProtKB=Q01118,HUMAN HGNC=10582 UniProtKB=Q9Y5Y9                                                                                                                                                                                                           | nervous system process                                                          |
| GO:0006898 | HUMAN HGNC=607 UniProtKB=P02654,HUMAN HGNC=555 UniProtKB=O43747,HUMAN HGNC=7228 UniProtKB=P22897,HUMAN HGNC=2092 UniProtKB=Q00610                                                                                                                                                                                                               | receptor-mediated endocytosis                                                   |
| GO:0005216 | HUMAN HGNC=12669 UniProtKB=P21796,HUMAN HGNC=12674 UniProtKB=Q9Y277,HUMAN HGNC=12672 UniProtKB=P45880                                                                                                                                                                                                                                           | ion channel activity                                                            |

|            |                                                                                                                                                                                                              |                                                                           |
|------------|--------------------------------------------------------------------------------------------------------------------------------------------------------------------------------------------------------------|---------------------------------------------------------------------------|
| PC00157    | HUMAN HGNC=15476 UniProtKB=P63167,HUMAN HGNC=30535 UniProtKB=Q8WVJ2,HUMAN HGNC=26664 UniProtKB=Q8N841                                                                                                        | microtubule or microtubule-binding cytoskeletal protein                   |
| GO:0071363 | HUMAN HGNC=1692 UniProtKB=P08962,HUMAN HGNC=533 UniProtKB=P04083,HUMAN HGNC=7178 UniProtKB=Q13201                                                                                                            | cellular response to growth factor stimulus                               |
| GO:0007010 | HUMAN HGNC=20250 UniProtKB=Q96IF1                                                                                                                                                                            | cytoskeleton organization                                                 |
| GO:0002718 | HUMAN HGNC=16961 UniProtKB=Q15762<br>HUMAN HGNC=9621 UniProtKB=Q6IBS0,HUMAN HGNC=3382 UniProtKB=Q08495,HUMAN HGNC=25361 UniProtKB=Q8N264,HUMAN HGNC=14653 UniProtKB=Q9HBI1,HUMAN HGNC=21295 UniProtKB=Q8TE68 | regulation of cytokine production involved in immune response             |
| GO:0120031 | HUMAN HGNC=19985 UniProtKB=P53999,HUMAN HGNC=20250 UniProtKB=Q96IF1                                                                                                                                          | plasma membrane bounded cell projection assembly                          |
| GO:0005667 | HUMAN HGNC=26068 UniProtKB=Q6IAA8,HUMAN HGNC=15848 UniProtKB=Q14141,HUMAN HGNC=9164 UniProtKB=Q99719,HUMAN HGNC=1717 UniProtKB=Q16181,HUMAN HGNC=2905 UniProtKB=Q14490,HUMAN HGNC=7729 UniProtKB=Q15019      | transcription regulator complex                                           |
| GO:0060090 | HUMAN HGNC=1173 UniProtKB=Q5H9R7,HUMAN HGNC=14871 UniProtKB=Q96A00,HUMAN HGNC=14952 UniProtKB=Q8TAE6,HUMAN HGNC=9304 UniProtKB=P63151                                                                        | molecular adaptor activity                                                |
| GO:0004721 |                                                                                                                                                                                                              | phosphoprotein phosphatase activity                                       |
| GO:0090307 | HUMAN HGNC=5048 UniProtKB=Q00839                                                                                                                                                                             | mitotic spindle assembly                                                  |
| GO:0005697 | HUMAN HGNC=5048 UniProtKB=Q00839                                                                                                                                                                             | telomerase holoenzyme complex                                             |
| GO:0046890 | HUMAN HGNC=533 UniProtKB=P04083                                                                                                                                                                              | regulation of lipid biosynthetic process                                  |
| GO:0035591 | HUMAN HGNC=15474 UniProtKB=Q9Y566,HUMAN HGNC=14294 UniProtKB=Q9BYB0                                                                                                                                          | signaling adaptor activity                                                |
| GO:0051896 | HUMAN HGNC=18233 UniProtKB=Q8NDB2                                                                                                                                                                            | regulation of protein kinase B signaling                                  |
| GO:0043001 | HUMAN HGNC=26486 UniProtKB=Q6PJW8,HUMAN HGNC=17643 UniProtKB=Q9HD26,HUMAN HGNC=8016 UniProtKB=P46459                                                                                                         | Golgi to plasma membrane protein transport                                |
| GO:0010639 | HUMAN HGNC=4374 UniProtKB=O60234                                                                                                                                                                             | negative regulation of organelle organization                             |
| GO:0000727 | HUMAN HGNC=1745 UniProtKB=O00311                                                                                                                                                                             | double-strand break repair via break-induced replication                  |
| GO:0030667 | HUMAN HGNC=2689 UniProtKB=P09172                                                                                                                                                                             | secretory granule membrane                                                |
| GO:0051445 | HUMAN HGNC=12401 UniProtKB=P33981                                                                                                                                                                            | regulation of meiotic cell cycle                                          |
| GO:0008203 | HUMAN HGNC=615 UniProtKB=Q13790,HUMAN HGNC=613 UniProtKB=P02649,HUMAN HGNC=1869 UniProtKB=P11597                                                                                                             | cholesterol metabolic process                                             |
| GO:0000288 | HUMAN HGNC=9207 UniProtKB=Q9UFF9                                                                                                                                                                             | nuclear-transcribed mRNA catabolic process, deadenylation-dependent decay |
| GO:0004553 | HUMAN HGNC=4298 UniProtKB=P16278,HUMAN HGNC=6740 UniProtKB=P61626                                                                                                                                            | hydrolase activity, hydrolyzing O-glycosyl compounds                      |

|           |   |                                                                                                                                                                                                                                                                                                                                                                                                                                                                                                                                                                                                                                                                                                                                |                                                            |
|-----------|---|--------------------------------------------------------------------------------------------------------------------------------------------------------------------------------------------------------------------------------------------------------------------------------------------------------------------------------------------------------------------------------------------------------------------------------------------------------------------------------------------------------------------------------------------------------------------------------------------------------------------------------------------------------------------------------------------------------------------------------|------------------------------------------------------------|
| GO:001674 | 1 | HUMAN HGNC=794 UniProtKB=P31939<br>HUMAN HGNC=14247 UniProtKB=O75964,HUMAN HGNC=7421 UniProtKB=P00403,HUMAN HGNC=837 UniProtKB=P30049,HUMAN HGNC=823 UniProtKB=P25705,HUMAN HGNC=19986 UniProtKB=P99999,HUMAN HGNC=850 UniProtKB=P48047,HUMAN HGNC=8898 UniProtKB=P07205,HUMAN HGNC=2265 UniProtKB=P13073,HUMAN HGNC=845 UniProtKB=O75947,HUMAN HGNC=2288 UniProtKB=P14406,HUMAN HGNC=2267 UniProtKB=P20674,HUMAN HGNC=12582 UniProtKB=P14927,HUMAN HGNC=12590 UniProtKB=P07919,HUMAN HGNC=833 UniProtKB=P36542,HUMAN HGNC=2292 UniProtKB=P15954,HUMAN HGNC=830 UniProtKB=P06576                                                                                                                                               | transferase activity,<br>transferring one-carbon<br>groups |
| GO:001598 | 6 | HUMAN HGNC=31332 UniProtKB=Q6IQ22,HUMAN HGNC=7007 UniProtKB=P61006,HUMAN HGNC=20120 UniProtKB=Q17RC7,HUMAN HGNC=7641 UniProtKB=P54920,HUMAN HGNC=11491 UniProtKB=P43405,HUMAN HGNC=9778 UniProtKB=P20337,HUMAN HGNC=11131 UniProtKB=O00161,HUMAN HGNC=533 UniProtKB=P04083,HUMAN HGNC=9857 UniProtKB=P61224,HUMAN HGNC=9855 UniProtKB=P62834,HUMAN HGNC=11446 UniProtKB=O00186,HUMAN HGNC=11445 UniProtKB=Q15833,HUMAN HGNC=9164 UniProtKB=Q99719,HUMAN HGNC=11429 UniProtKB=O75558,HUMAN HGNC=11510 UniProtKB=Q8N9I0,HUMAN HGNC=15588 UniProtKB=Q96C24,HUMAN HGNC=30389 UniProtKB=Q96A65,HUMAN HGNC=9761 UniProtKB=Q15907,HUMAN HGNC=11512 UniProtKB=Q9H2B2,HUMAN HGNC=8515 UniProtKB=Q9HC10,HUMAN HGNC=9767 UniProtKB=O00194 | ATP synthesis coupled<br>proton transport                  |
| GO:009950 | 0 |                                                                                                                                                                                                                                                                                                                                                                                                                                                                                                                                                                                                                                                                                                                                | vesicle fusion to plasma<br>membrane                       |
| GO:190121 | 5 | HUMAN HGNC=613 UniProtKB=P02649<br>HUMAN HGNC=12407 UniProtKB=P68366,HUMAN HGNC=16051 UniProtKB=Q8TEW0,HUMAN HGNC=12410 UniProtKB=Q9NY65,HUMAN HGNC=11582 UniProtKB=Q15813,HUMAN HGNC=20778 UniProtKB=P07437,HUMAN HGNC=16257 UniProtKB=Q9H4B7,HUMAN HGNC=20766 UniProtKB=Q71U36,HUMAN HGNC=20774 UniProtKB=P04350,HUMAN HGNC=20771 UniProtKB=P68371,HUMAN HGNC=26664 UniProtKB=Q8N841                                                                                                                                                                                                                                                                                                                                         | negative regulation of<br>neuron death                     |
| GO:000022 | 6 | HUMAN HGNC=1406 UniProtKB=Q9Y698,HUMAN HGNC=2974 UniProtKB=P50570,HUMAN HGNC=29125 UniProtKB=Q9UQ16,HUMAN HGNC=603 UniProtKB=P04114,HUMAN HGNC=19760 UniProtKB=Q96T51                                                                                                                                                                                                                                                                                                                                                                                                                                                                                                                                                          | microtubule cytoskeleton<br>organization                   |
| GO:001503 | 1 | HUMAN HGNC=10594 UniProtKB=Q01118,HUMAN HGNC=11138 UniProtKB=P37840,HUMAN HGNC=4390 UniProtKB=P50148,HUMAN HGNC=10582 UniProtKB=Q9Y5Y9                                                                                                                                                                                                                                                                                                                                                                                                                                                                                                                                                                                         | protein transport                                          |
| GO:000726 | 8 | HUMAN HGNC=30167 UniProtKB=P13667,HUMAN HGNC=11476 UniProtKB=O15260,HUMAN HGNC=1455 UniProtKB=P27797,HUMAN HGNC=1735 UniProtKB=Q16543,HUMAN HGNC=11582 UniProtKB=Q15813,HUMAN HGNC=8548 UniProtKB=P07237,HUMAN HGNC=9261 UniProtKB=Q13356,HUMAN HGNC=8988 UniProtKB=Q13526,HUMAN HGNC=1473 UniProtKB=P27824,HUMAN HGNC=4606 UniProtKB=P30101,HUMAN HGNC=5228 UniProtKB=P25686,HUMAN HGNC=9253 UniProtKB=P62937,HUMAN HGNC=2711 UniProtKB=Q14203,HUMAN HGNC=13919 UniProtKB=P46379,HUMAN HGNC=5461 UniProtKB=P78318,HUMAN HGNC=24718 Uni                                                                                                                                                                                        | chemical synaptic<br>transmission                          |
| PC00072   |   |                                                                                                                                                                                                                                                                                                                                                                                                                                                                                                                                                                                                                                                                                                                                | chaperone                                                  |

|            |                                                                                                                                                                                                                                                                                                                  |                                                     |
|------------|------------------------------------------------------------------------------------------------------------------------------------------------------------------------------------------------------------------------------------------------------------------------------------------------------------------|-----------------------------------------------------|
|            | ProtKB=Q96JJ7,HUMAN HGNC=21073 UniProtKB=Q8NBS9,HUMAN HGNC=24811 UniProtKB=Q14554,HUMAN HGNC=5270 UniProtKB=P25685,HUMAN HGNC=30168 UniProtKB=Q15084,HUMAN HGNC=3711 UniProtKB=P62942,HUMAN HGNC=7910 UniProtKB=P06748,HUMAN HGNC=9255 UniProtKB=P23284,HUMAN HGNC=9259 UniProtKB=P30405                         |                                                     |
| GO:0019905 | HUMAN HGNC=20726 UniProtKB=Q8WVM8,HUMAN HGNC=7641 UniProtKB=P54920,HUMAN HGNC=11510 UniProtKB=Q8N9I0,HUMAN HGNC=11131 UniProtKB=O00161,HUMAN HGNC=12647 UniProtKB=Q9BV40                                                                                                                                         | syntaxin binding                                    |
| GO:0098796 | HUMAN HGNC=26068 UniProtKB=Q6IAA8,HUMAN HGNC=17955 UniProtKB=O43504,HUMAN HGNC=18587 UniProtKB=O94901,HUMAN HGNC=26212 UniProtKB=P61009,HUMAN HGNC=12666 UniProtKB=P55072,HUMAN HGNC=13487 UniProtKB=Q96QK1,HUMAN HGNC=1628 UniProtKB=P08571,HUMAN HGNC=17943 UniProtKB=Q9GZP9,HUMAN HGNC=15606 UniProtKB=Q9UHA4 | membrane protein complex                            |
| GO:0004713 | HUMAN HGNC=6171 UniProtKB=Q08881,HUMAN HGNC=4037 UniProtKB=P06241,HUMAN HGNC=12841 UniProtKB=P07947,HUMAN HGNC=11283 UniProtKB=P12931,HUMAN HGNC=6735 UniProtKB=P07948,HUMAN HGNC=2444 UniProtKB=P41240                                                                                                          | protein tyrosine kinase activity                    |
| GO:0030335 | HUMAN HGNC=9065 UniProtKB=P19174,HUMAN HGNC=533 UniProtKB=P04083                                                                                                                                                                                                                                                 | positive regulation of cell migration               |
| PC00222    | HUMAN HGNC=3214 UniProtKB=P13639,HUMAN HGNC=3208 UniProtKB=P24534,HUMAN HGNC=12420 UniProtKB=P49411,HUMAN HGNC=3211 UniProtKB=P29692                                                                                                                                                                             | translation elongation factor                       |
| GO:0043087 |                                                                                                                                                                                                                                                                                                                  | regulation of GTPase activity                       |
| GO:0051298 | HUMAN HGNC=17168 UniProtKB=Q9H2M9                                                                                                                                                                                                                                                                                |                                                     |
| GO:0030426 | HUMAN HGNC=28959 UniProtKB=Q14008,HUMAN HGNC=7910 UniProtKB=P06748                                                                                                                                                                                                                                               | centrosome duplication                              |
| GO:0046872 | HUMAN HGNC=11148 UniProtKB=Q16658                                                                                                                                                                                                                                                                                | growth cone                                         |
| GO:0007528 | HUMAN HGNC=5269 UniProtKB=P61604                                                                                                                                                                                                                                                                                 | metal ion binding                                   |
| GO:0097061 | HUMAN HGNC=15474 UniProtKB=Q9Y566,HUMAN HGNC=14294 UniProtKB=Q9BYB0                                                                                                                                                                                                                                              | neuromuscular junction development                  |
| GO:0031400 | HUMAN HGNC=3338 UniProtKB=Q14247,HUMAN HGNC=15474 UniProtKB=Q9Y566,HUMAN HGNC=2695 UniProtKB=Q16643,HUMAN HGNC=2696 UniProtKB=Q9UJU6,HUMAN HGNC=4844 UniProtKB=P14317,HUMAN HGNC=14294 UniProtKB=Q9BYB0                                                                                                          | dendritic spine organization                        |
| GO:0036503 |                                                                                                                                                                                                                                                                                                                  | negative regulation of protein modification process |
| GO:0004672 | HUMAN HGNC=21314 UniProtKB=Q8WXC6                                                                                                                                                                                                                                                                                |                                                     |
| PC00093    | HUMAN HGNC=15663 UniProtKB=Q9NYU2                                                                                                                                                                                                                                                                                | ERAD pathway                                        |
| GO:0009967 | HUMAN HGNC=10372 UniProtKB=P05386,HUMAN HGNC=6040 UniProtKB=Q13418                                                                                                                                                                                                                                               | protein kinase activity                             |
| GO:0044271 | HUMAN HGNC=28422 UniProtKB=Q8NCE0                                                                                                                                                                                                                                                                                | endodeoxyribonuclease                               |
|            | HUMAN HGNC=6616 UniProtKB=P48059,HUMAN HGNC=15474 UniProtKB=Q9Y566,HUMAN HGNC=16961 UniProtKB=Q15762,HUMAN HGNC=14294 UniProtKB=Q9BYB0,HUMAN HGNC=11119 UniProtKB=Q99835,HUMAN HGNC=11766 UniProtKB=P01137                                                                                                       | positive regulation of signal transduction          |
|            | HUMAN HGNC=2689 UniProtKB=P09172                                                                                                                                                                                                                                                                                 | cellular nitrogen compound biosynthetic process     |

|           |                                                        |                            |
|-----------|--------------------------------------------------------|----------------------------|
| GO:004831 | HUMAN HGNC=13206 UniProtKB=O60296,HUMAN HGNC=2973      | mitochondrion distribution |
| 1         | UniProtKB=O00429                                       |                            |
| GO:000741 |                                                        | central nervous system     |
| 7         | HUMAN HGNC=11119 UniProtKB=Q99835                      | development                |
| GO:000669 |                                                        | cholesterol biosynthetic   |
| 5         | HUMAN HGNC=9141 UniProtKB=Q15126                       | process                    |
| GO:003130 | HUMAN HGNC=8533 UniProtKB=P51575,HUMAN HGNC=6501 U     | integral component of      |
| 1         | niProtKB=P13473                                        |                            |
|           | HUMAN HGNC=6325 UniProtKB=O60282,HUMAN HGNC=2713 U     | organelle membrane         |
|           | niProtKB=O75935,HUMAN HGNC=2712 UniProtKB=Q13561,HUM   |                            |
| GO:000587 | AN HGNC=6317 UniProtKB=O43896,HUMAN HGNC=6835 UniPro   | microtubule associated     |
| 5         | tKB=P78559,HUMAN HGNC=17060 UniProtKB=Q92845           |                            |
|           | HUMAN HGNC=14313 UniProtKB=Q8WYA0,HUMAN HGNC=1158      | complex                    |
|           | 2 UniProtKB=Q15813,HUMAN HGNC=6510 UniProtKB=P16949,H  |                            |
| GO:001563 | UMAN HGNC=11579 UniProtKB=O75347,HUMAN HGNC=26664      | tubulin binding            |
| 1         | UniProtKB=Q8N841                                       |                            |
|           | HUMAN HGNC=1623 UniProtKB=P50990,HUMAN HGNC=1617 U     |                            |
|           | niProtKB=P50991,HUMAN HGNC=1622 UniProtKB=Q99832,HUMA  |                            |
|           | N HGNC=5239 UniProtKB=P17066,HUMAN HGNC=1735 UniProtK  |                            |
|           | B=Q16543,HUMAN HGNC=1615 UniProtKB=P78371,HUMAN HGN    |                            |
|           | C=5241 UniProtKB=P11142,HUMAN HGNC=5269 UniProtKB=P61  |                            |
|           | 604,HUMAN HGNC=5253 UniProtKB=P07900,HUMAN HGNC=116    |                            |
|           | 55 UniProtKB=P17987,HUMAN HGNC=1618 UniProtKB=P48643,H |                            |
|           | UMAN HGNC=5258 UniProtKB=P08238,HUMAN HGNC=1620 Uni    |                            |
|           | ProtKB=P40227,HUMAN HGNC=12028 UniProtKB=P14625,HUMA   |                            |
|           | N HGNC=5238 UniProtKB=P11021,HUMAN HGNC=32153 UniProt  |                            |
|           | KB=A6NM43,HUMAN HGNC=5270 UniProtKB=P25685,HUMAN H     |                            |
|           | GNC=5240 UniProtKB=P48741,HUMAN HGNC=30535 UniProtKB=  |                            |
| GO:005108 | Q8WVJ2,HUMAN HGNC=15663 UniProtKB=Q9NYU2,HUMAN HG      | unfolded protein binding   |
| 2         | NC=7629 UniProtKB=E9PAV3                               |                            |
|           | HUMAN HGNC=463 UniProtKB=Q9UKV5,HUMAN HGNC=11617 U     |                            |
|           | niProtKB=Q15369,HUMAN HGNC=9556 UniProtKB=O00231,HUM   |                            |
|           | AN HGNC=9571 UniProtKB=Q92530,HUMAN HGNC=12469 UniPr   |                            |
|           | otKB=P22314,HUMAN HGNC=12476 UniProtKB=P61077,HUMAN    |                            |
|           | HGNC=16476 UniProtKB=Q9H0E2,HUMAN HGNC=12475 UniProt   |                            |
| GO:000651 | KB=P62837,HUMAN HGNC=14452 UniProtKB=Q9NYG5,HUMAN H    |                            |
| 1         | GNC=2239 UniProtKB=Q9UNS2                              | ubiquitin-dependent        |
| GO:003086 | HUMAN HGNC=1117 UniProtKB=Q9UPA5,HUMAN HGNC=13406      | protein catabolic process  |
| 3         | UniProtKB=Q9Y6V0                                       | cortical cytoskeleton      |
| GO:004646 |                                                        |                            |
| 4         | HUMAN HGNC=13921 UniProtKB=O95870                      | acylglycerol catabolic     |
| GO:000681 |                                                        | process                    |
| 6         | HUMAN HGNC=1393 UniProtKB=O60840                       | calcium ion transport      |
|           |                                                        |                            |
| GO:003114 | HUMAN HGNC=2552 UniProtKB=Q13617,HUMAN HGNC=10899      | SCF-dependent proteasomal  |
| 6         | UniProtKB=P63208                                       |                            |
| GO:004544 | HUMAN HGNC=14685 UniProtKB=Q9Y624,HUMAN HGNC=243 U     | ubiquitin-dependent        |
| 6         | niProtKB=P35611,HUMAN HGNC=11828 UniProtKB=Q9UDY2      |                            |
|           |                                                        | protein catabolic process  |
|           |                                                        | endothelial cell           |
|           |                                                        | differentiation            |
|           |                                                        | establishment or           |
| GO:004519 | HUMAN HGNC=16051 UniProtKB=Q8TEW0,HUMAN HGNC=3037      | maintenance of epithelial  |
| 7         | 7 UniProtKB=Q14160                                     |                            |
|           | HUMAN HGNC=2315 UniProtKB=Q96FN4,HUMAN HGNC=11510      | cell apical/basal polarity |
| GO:007088 | UniProtKB=Q8N9I0,HUMAN HGNC=11512 UniProtKB=Q9H2B2,HU  |                            |
| 7         | MAN HGNC=82 UniProtKB=P09110                           | cellular response to       |
|           |                                                        | chemical stimulus          |

|           |                                                       |  |                               |
|-----------|-------------------------------------------------------|--|-------------------------------|
| GO:000228 |                                                       |  | T cell activation involved in |
| 6         | HUMAN HGNC=533 UniProtKB=P04083                       |  | immune response               |
|           | HUMAN HGNC=24526 UniProtKB=Q6DD88,HUMAN HGNC=4395     |  |                               |
|           | UniProtKB=P19086,HUMAN HGNC=4384 UniProtKB=P63096,HUM |  |                               |
|           | AN HGNC=4398 UniProtKB=P62879,HUMAN HGNC=4381 UniProt |  |                               |
|           | KB=Q14344,HUMAN HGNC=4387 UniProtKB=P08754,HUMAN HG   |  |                               |
|           | NC=20731 UniProtKB=Q9HAV0,HUMAN HGNC=4385 UniProtKB=  |  |                               |
|           | P04899,HUMAN HGNC=4393 UniProtKB=P11488,HUMAN HGNC=   |  |                               |
|           | 4390 UniProtKB=P50148,HUMAN HGNC=11231 UniProtKB=Q8W  |  |                               |
| PC00117   | XF7,HUMAN HGNC=4396 UniProtKB=P62873                  |  | heterotrimeric G-protein      |
| GO:000011 | HUMAN HGNC=29989 UniProtKB=Q86YP4,HUMAN HGNC=10474    |  | histone deacetylase           |
| 8         | UniProtKB=Q9Y265,HUMAN HGNC=10475 UniProtKB=Q9Y230    |  | complex                       |
| GO:004527 |                                                       |  | plasma membrane               |
| 2         | HUMAN HGNC=7717 UniProtKB=P19404                      |  | respiratory chain complex I   |
| GO:004801 |                                                       |  |                               |
| 8         | HUMAN HGNC=3157 UniProtKB=Q92838                      |  | receptor ligand activity      |
| GO:000517 | HUMAN HGNC=3964 UniProtKB=P01225,HUMAN HGNC=16452     |  |                               |
| 9         | UniProtKB=P0DN86,HUMAN HGNC=16721 UniProtKB=A6NKQ9    |  | hormone activity              |
| GO:004210 | HUMAN HGNC=11491 UniProtKB=P43405,HUMAN HGNC=533 U    |  | positive regulation of T cell |
| 2         | niProtKB=P04083                                       |  | proliferation                 |
|           | HUMAN HGNC=26068 UniProtKB=Q6IAA8,HUMAN HGNC=6499     |  |                               |
|           | UniProtKB=P11279,HUMAN HGNC=17955 UniProtKB=O43504,HU |  |                               |
| GO:003190 | MAN HGNC=6501 UniProtKB=P13473,HUMAN HGNC=15606 Uni   |  |                               |
| 2         | ProtKB=Q9UHA4                                         |  | late endosome membrane        |
| GO:000097 | HUMAN HGNC=29513 UniProtKB=O60306,HUMAN HGNC=5048     |  |                               |
| 4         | UniProtKB=Q00839,HUMAN HGNC=1743 UniProtKB=Q99459     |  | Prp19 complex                 |
| GO:005140 | HUMAN HGNC=17865 UniProtKB=Q96A26,HUMAN HGNC=613 U    |  |                               |
| 2         | niProtKB=P02649                                       |  | neuron apoptotic process      |
| GO:000704 |                                                       |  |                               |
| 0         | HUMAN HGNC=9788 UniProtKB=P51149                      |  | lysosome organization         |
|           | HUMAN HGNC=10372 UniProtKB=P05386,HUMAN HGNC=14511    |  |                               |
|           | UniProtKB=P82663,HUMAN HGNC=10377 UniProtKB=P05387,HU |  |                               |
|           | MAN HGNC=10404 UniProtKB=P15880,HUMAN HGNC=10363 Un   |  |                               |
|           | iProtKB=P18124,HUMAN HGNC=10385 UniProtKB=P25398,HUMA |  |                               |
|           | N HGNC=10378 UniProtKB=P52815,HUMAN HGNC=10396 UniPr  |  |                               |
|           | otKB=P62249,HUMAN HGNC=10305 UniProtKB=P50914,HUMAN   |  |                               |
| PC00202   | HGNC=10353 UniProtKB=P36578                           |  | ribosomal protein             |
| GO:000699 | HUMAN HGNC=18587 UniProtKB=O94901,HUMAN HGNC=15912    |  | nuclear envelope              |
| 8         | UniProtKB=Q9UNZ2                                      |  | organization                  |
| GO:005165 | HUMAN HGNC=16051 UniProtKB=Q8TEW0,HUMAN HGNC=1149     |  | establishment of organelle    |
| 6         | 1 UniProtKB=P43405                                    |  | localization                  |
| PC00174   | HUMAN HGNC=8087 UniProtKB=P29728                      |  | nucleotidyltransferase        |
| GO:005187 | HUMAN HGNC=11387 UniProtKB=P31948,HUMAN HGNC=30594    |  |                               |
| 9         | UniProtKB=Q9H3U1                                      |  | Hsp90 protein binding         |
|           | HUMAN HGNC=11030 UniProtKB=Q9Y6R1,HUMAN HGNC=55 Un    |  |                               |
|           | iProtKB=O15439,HUMAN HGNC=11027 UniProtKB=P02730,HUMA |  |                               |
| GO:005508 | N HGNC=17292 UniProtKB=Q8IWA5,HUMAN HGNC=11034 UniPr  |  |                               |
| 5         | otKB=Q2YOW8                                           |  | transmembrane transport       |
|           | HUMAN HGNC=5575 UniProtKB=A0A0B4J1V2,HUMAN HGNC=56    |  |                               |
|           | 45 UniProtKB=A0A0C4DH34,HUMAN HGNC=5549 UniProtKB=A0  |  |                               |
|           | A0C4DH31,HUMAN HGNC=5554 UniProtKB=P01743,HUMAN HG    |  |                               |
|           | NC=5480 UniProtKB=P01880,HUMAN HGNC=5659 UniProtKB=A0 |  |                               |
| GO:004274 | A0C4DH38,HUMAN HGNC=5634 UniProtKB=A0A075B7F0,HUMAN   |  | defense response to           |
| 2         | HGNC=38476 UniProtKB=B9A064,HUMAN HGNC=5861 UniProtK  |  | bacterium                     |

|            |                                                                                                                                                                                                                                                                                                                                                                                                                                                                                                                                                                                                                                                                                                                                                                                                                                                                                                                                                                                                                                                                                                                                                                                                                                                                                                                                                                                                                                                                                                                                                                                                                                                                                                                                                                                                                                                                           |                                                                   |
|------------|---------------------------------------------------------------------------------------------------------------------------------------------------------------------------------------------------------------------------------------------------------------------------------------------------------------------------------------------------------------------------------------------------------------------------------------------------------------------------------------------------------------------------------------------------------------------------------------------------------------------------------------------------------------------------------------------------------------------------------------------------------------------------------------------------------------------------------------------------------------------------------------------------------------------------------------------------------------------------------------------------------------------------------------------------------------------------------------------------------------------------------------------------------------------------------------------------------------------------------------------------------------------------------------------------------------------------------------------------------------------------------------------------------------------------------------------------------------------------------------------------------------------------------------------------------------------------------------------------------------------------------------------------------------------------------------------------------------------------------------------------------------------------------------------------------------------------------------------------------------------------|-------------------------------------------------------------------|
|            | B=A0M8Q6,HUMAN HGNC=5647 UniProtKB=A0A087WSY4,HUMAN HGNC=5563 UniProtKB=A0A075B7D0,HUMAN HGNC=5856 UniProtKB=P0DOY2,HUMAN HGNC=5606 UniProtKB=P01763,HUMAN HGNC=5576 UniProtKB=P01817,HUMAN HGNC=5528 UniProtKB=P01861,HUMAN HGNC=5541 UniProtKB=P01871,HUMAN HGNC=5585 UniProtKB=A0A0C4DH32,HUMAN HGNC=5551 UniProtKB=A0A0C4DH33,HUMAN HGNC=5526 UniProtKB=P01859,HUMAN HGNC=5657 UniProtKB=P0DP08,HUMAN Ensembl=ENSG00000282639 UniProtKB=A0A0J9YX35,HUMAN Gene=HV309_HUMAN UniProtKB=P01782,HUMAN HGNC=5654 UniProtKB=P01825,HUMAN HGNC=5553 UniProtKB=A0A0A0MS14,HUMAN Gene=HV108_HUMAN UniProtKB=P0DP01,HUMAN HGNC=5624 UniProtKB=A0A0B4J1X5,HUMAN HGNC=5620 UniProtKB=P01780,HUMAN HGNC=5598 UniProtKB=A0A0C4DH35,HUMAN HGNC=5580 UniProtKB=P01762,HUMAN HGNC=5633 UniProtKB=A0A075B7D8,HUMAN HGNC=5582 UniProtKB=A0A0B4J1V0,HUMAN HGNC=5478 UniProtKB=P01876,HUMAN HGNC=5617 UniProtKB=A0A075B6Q5,HUMAN HGNC=5594 UniProtKB=P0DP03,HUMAN HGNC=5655 UniProtKB=A0A0C4DH41,HUMAN HGNC=5636 UniProtKB=A0A075B7B8,HUMAN HGNC=5586 UniProtKB=A0A0B4J1V1,HUMAN HGNC=5581 UniProtKB=P01766,HUMAN HGNC=5622 UniProtKB=A0A0B4J1Y9,HUMAN HGNC=5652 UniProtKB=A0A075B6R2,HUMAN HGNC=5593 UniProtKB=P0DP02,HUMAN HGNC=5479 UniProtKB=P01877,HUMAN HGNC=5619 UniProtKB=A0A0C4DH42,HUMAN HGNC=5596 UniProtKB=P01772,HUMAN HGNC=5550 UniProtKB=P23083,HUMAN HGNC=5604 UniProtKB=A0A0B4J1X8,HUMAN HGNC=5525 UniProtKB=P01857,HUMAN HGNC=5662 UniProtKB=A0A0B4J1U7,HUMAN HGNC=5601 UniProtKB=A0A0C4DH36,HUMAN HGNC=5716 UniProtKB=P01834,HUMAN HGNC=5588 UniProtKB=P01764,HUMAN HGNC=5857 UniProtKB=P0DOY3,HUMAN HGNC=5610 UniProtKB=P01767,HUMAN Ensembl=ENSG00000282150 UniProtKB=A0A0J9YY99,HUMAN HGNC=5527 UniProtKB=P01860 UniProtKB=P54819,HUMAN HGNC=363 UniProtKB=P27144,HUMAN HGNC=361 UniProtKB=P00568,HUMAN HGNC=18170 UniProtKB=P30085,HUMAN HGNC=17376 UniProtKB=Q9UIJ7 | adenylate kinase activity                                         |
| GO:0004017 |                                                                                                                                                                                                                                                                                                                                                                                                                                                                                                                                                                                                                                                                                                                                                                                                                                                                                                                                                                                                                                                                                                                                                                                                                                                                                                                                                                                                                                                                                                                                                                                                                                                                                                                                                                                                                                                                           |                                                                   |
| GO:0005776 | HUMAN HGNC=6501 UniProtKB=P13473                                                                                                                                                                                                                                                                                                                                                                                                                                                                                                                                                                                                                                                                                                                                                                                                                                                                                                                                                                                                                                                                                                                                                                                                                                                                                                                                                                                                                                                                                                                                                                                                                                                                                                                                                                                                                                          | autophagosome regulation of mitotic metaphase/anaphase transition |
| GO:0030071 | HUMAN HGNC=15713 UniProtKB=Q9UJX4,HUMAN HGNC=14452 UniProtKB=Q9NYG5                                                                                                                                                                                                                                                                                                                                                                                                                                                                                                                                                                                                                                                                                                                                                                                                                                                                                                                                                                                                                                                                                                                                                                                                                                                                                                                                                                                                                                                                                                                                                                                                                                                                                                                                                                                                       |                                                                   |
| GO:0006637 | HUMAN HGNC=9141 UniProtKB=Q15126                                                                                                                                                                                                                                                                                                                                                                                                                                                                                                                                                                                                                                                                                                                                                                                                                                                                                                                                                                                                                                                                                                                                                                                                                                                                                                                                                                                                                                                                                                                                                                                                                                                                                                                                                                                                                                          | acyl-CoA metabolic process                                        |
| GO:0051223 | HUMAN HGNC=26486 UniProtKB=Q6PJW8,HUMAN HGNC=10534 UniProtKB=Q9NR31,HUMAN HGNC=17643 UniProtKB=Q9HD26,HUMAN HGNC=6703 UniProtKB=Q9Y608,HUMAN HGNC=6767 UniProtKB=Q15797,HUMAN HGNC=29989 UniProtKB=Q86YP4,HUMAN HGNC=30547 UniProtKB=Q96K17,HUMAN HGNC=7183 UniProtKB=P41218,HUMAN HGNC=11364 UniProtKB=P40763,HUMAN HGNC=6702 UniProtKB=Q32MZ4,HUMAN HGNC=18807 UniProtKB=O94983                                                                                                                                                                                                                                                                                                                                                                                                                                                                                                                                                                                                                                                                                                                                                                                                                                                                                                                                                                                                                                                                                                                                                                                                                                                                                                                                                                                                                                                                                         | regulation of protein transport                                   |
| PC00218    |                                                                                                                                                                                                                                                                                                                                                                                                                                                                                                                                                                                                                                                                                                                                                                                                                                                                                                                                                                                                                                                                                                                                                                                                                                                                                                                                                                                                                                                                                                                                                                                                                                                                                                                                                                                                                                                                           | DNA-binding transcription factor                                  |
| GO:0000724 | HUMAN HGNC=26200 UniProtKB=Q9H668,HUMAN HGNC=1101 UniProtKB=P51587,HUMAN HGNC=17196 UniProtKB=Q8NG08                                                                                                                                                                                                                                                                                                                                                                                                                                                                                                                                                                                                                                                                                                                                                                                                                                                                                                                                                                                                                                                                                                                                                                                                                                                                                                                                                                                                                                                                                                                                                                                                                                                                                                                                                                      | double-strand break repair via homologous recombination           |

|            |                                                                                                                                                                                                                                                                                                                                                                                                                                                  |                                                               |
|------------|--------------------------------------------------------------------------------------------------------------------------------------------------------------------------------------------------------------------------------------------------------------------------------------------------------------------------------------------------------------------------------------------------------------------------------------------------|---------------------------------------------------------------|
| GO:0042273 | HUMAN HGNC=7910 UniProtKB=P06748,HUMAN HGNC=10305 UniProtKB=P50914                                                                                                                                                                                                                                                                                                                                                                               | ribosomal large subunit biogenesis                            |
| GO:0007173 | HUMAN HGNC=11283 UniProtKB=P12931,HUMAN HGNC=25153 UniProtKB=Q96EY5                                                                                                                                                                                                                                                                                                                                                                              | epidermal growth factor receptor signaling pathway            |
| GO:0034703 | HUMAN HGNC=1406 UniProtKB=Q9Y698,HUMAN HGNC=3338 UniProtKB=Q14247,HUMAN HGNC=10594 UniProtKB=Q01118,HUMAN HGNC=10582 UniProtKB=Q9Y5Y9                                                                                                                                                                                                                                                                                                            | cation channel complex                                        |
| GO:0006465 | HUMAN HGNC=26212 UniProtKB=P61009                                                                                                                                                                                                                                                                                                                                                                                                                | signal peptide processing                                     |
| GO:0005882 | HUMAN HGNC=1090 UniProtKB=Q03001,HUMAN HGNC=9069 UniProtKB=Q15149                                                                                                                                                                                                                                                                                                                                                                                | intermediate filament                                         |
| GO:0034455 | HUMAN HGNC=12755 UniProtKB=Q9UNX4                                                                                                                                                                                                                                                                                                                                                                                                                | t-UTP complex regulation of supramolecular fiber organization |
| GO:1902903 | HUMAN HGNC=6835 UniProtKB=P78559                                                                                                                                                                                                                                                                                                                                                                                                                 | negative regulation of translation                            |
| GO:0017148 | HUMAN HGNC=17970 UniProtKB=Q9BPZ3,HUMAN HGNC=9207 UniProtKB=Q9UFF9                                                                                                                                                                                                                                                                                                                                                                               |                                                               |
| GO:0004016 | HUMAN HGNC=237 UniProtKB=O43306                                                                                                                                                                                                                                                                                                                                                                                                                  | adenylate cyclase activity                                    |
| GO:0032640 | HUMAN HGNC=6517 UniProtKB=P18428                                                                                                                                                                                                                                                                                                                                                                                                                 | tumor necrosis factor production                              |
| GO:0005669 | HUMAN HGNC=17305 UniProtKB=Q9Y6J9                                                                                                                                                                                                                                                                                                                                                                                                                | transcription factor TFIID complex                            |
| GO:0061013 | HUMAN HGNC=29190 UniProtKB=Q9UPQ9                                                                                                                                                                                                                                                                                                                                                                                                                | regulation of mRNA catabolic process                          |
|            | HUMAN HGNC=8062 UniProtKB=P49790,HUMAN HGNC=30052 UniProtKB=Q8TEM1,HUMAN HGNC=9847 UniProtKB=P43487,HUMAN HGNC=17859 UniProtKB=Q5SRE5                                                                                                                                                                                                                                                                                                            | nuclear pore                                                  |
| GO:0005643 | HUMAN HGNC=14685 UniProtKB=Q9Y624,HUMAN HGNC=11756 UniProtKB=Q03403                                                                                                                                                                                                                                                                                                                                                                              | system process                                                |
| GO:0007041 | HUMAN HGNC=1406 UniProtKB=Q9Y698                                                                                                                                                                                                                                                                                                                                                                                                                 | lysosomal transport                                           |
| GO:0043022 | HUMAN HGNC=3214 UniProtKB=P13639,HUMAN HGNC=1243 UniProtKB=Q07021,HUMAN HGNC=3265 UniProtKB=P05198                                                                                                                                                                                                                                                                                                                                               | ribosome binding                                              |
|            | HUMAN HGNC=10474 UniProtKB=Q9Y265,HUMAN Gene=EIF2S3L UniProtKB=Q2VIR3,HUMAN HGNC=3285 UniProtKB=P23588,HUMAN HGNC=10475 UniProtKB=Q9Y230                                                                                                                                                                                                                                                                                                         | ribonucleoprotein complex assembly                            |
| GO:0022618 | HUMAN HGNC=2230 UniProtKB=P53621,HUMAN HGNC=21354 UniProtKB=Q86XR7,HUMAN HGNC=575 UniProtKB=Q9Y587,HUMAN HGNC=24251 UniProtKB=Q9Y3A6,HUMAN HGNC=2231 UniProtKB=P53618,HUMAN HGNC=10701 UniProtKB=Q15436,HUMAN HGNC=16998 UniProtKB=P49755,HUMAN HGNC=2092 UniProtKB=Q00610,HUMAN HGNC=649 UniProtKB=P48444,HUMAN HGNC=2090 UniProtKB=P09496,HUMAN HGNC=2232 UniProtKB=P35606,HUMAN HGNC=16996 UniProtKB=Q15363,HUMAN HGNC=24878 UniProtKB=Q9BVK6 | vesicle coat protein                                          |
| PC00235    | HUMAN HGNC=8504 UniProtKB=Q969R2,HUMAN HGNC=544 UniProtKB=P08133,HUMAN HGNC=1869 UniProtKB=P11597,HUMAN HGNC=603 UniProtKB=P04114                                                                                                                                                                                                                                                                                                                | cholesterol binding                                           |
| GO:0015485 | HUMAN HGNC=17169 UniProtKB=Q13162,HUMAN HGNC=16753 UniProtKB=P30041,HUMAN HGNC=7413 UniProtKB=Q13126,HUMAN HGNC=5382 UniProtKB=O75874,HUMAN HGNC=16369 UniProtKB=Q99497,HUMAN HGNC=4553 UniProtKB=P07203,HUMAN                                                                                                                                                                                                                                   | cytosol                                                       |

|HGNC=9554|UniProtKB=Q99460,HUMAN|HGNC=8988|UniProtKB=Q13526,HUMAN|HGNC=463|UniProtKB=Q9UKV5,HUMAN|HGNC=414|UniProtKB=P04075,HUMAN|HGNC=9353|UniProtKB=P32119,HUMAN|HGNC=4831|UniProtKB=P69891,HUMAN|HGNC=4458|UniProtKB=P06744,HUMAN|HGNC=1742|UniProtKB=P50851,HUMAN|HGNC=29035|UniProtKB=O43314,HUMAN|HGNC=2431|UniProtKB=P55060,HUMAN|HGNC=8878|UniProtKB=Q01813,HUMAN|HGNC=395|UniProtKB=P13716,HUMAN|HGNC=9275|UniProtKB=P35813,HUMAN|HGNC=3211|UniProtKB=P29692,HUMAN|HGNC=13485|UniProtKB=Q9BXU7,HUMAN|HGNC=25153|UniProtKB=Q96EY5,HUMAN|HGNC=11179|UniProtKB=P00441,HUMAN|HGNC=5253|UniProtKB=P07900,HUMAN|HGNC=25648|UniProtKB=Q8N5J2,HUMAN|HGNC=5258|UniProtKB=P08238,HUMAN|HGNC=4922|UniProtKB=P19367,HUMAN|HGNC=8087|UniProtKB=P29728,HUMAN|HGNC=9852|UniProtKB=O95373,HUMAN|HGNC=19388|UniProtKB=P49593,HUMAN|HGNC=3148|UniProtKB=P19971,HUMAN|HGNC=25035|UniProtKB=Q5VVQ6,HUMAN|HGNC=9859|UniProtKB=P52306,HUMAN|HGNC=24552|UniProtKB=Q3LXA3,HUMAN|HGNC=4141|UniProtKB=P04406,HUMAN|HGNC=9304|UniProtKB=P63151,HUMAN|HGNC=4116|UniProtKB=Q14376,HUMAN|HGNC=20726|UniProtKB=Q8WVM8,HUMAN|HGNC=4638|UniProtKB=P09211,HUMAN|HGNC=678|UniProtKB=P52565,HUMAN|HGNC=361|UniProtKB=P00568,HUMAN|HGNC=9352|UniProtKB=Q06830,HUMAN|HGNC=9552|UniProtKB=P62195,HUMAN|HGNC=21539|UniProtKB=Q9BX46,HUMAN|HGNC=12016|UniProtKB=P29144,HUMAN|HGNC=8898|UniProtKB=P07205,HUMAN|HGNC=4827|UniProtKB=P68871,HUMAN|HGNC=24437|UniProtKB=Q96KP4,HUMAN|HGNC=1050|UniProtKB=P55957,HUMAN|HGNC=3350|UniProtKB=P06733,HUMAN|HGNC=13919|UniProtKB=P46379,HUMAN|HGNC=649|UniProtKB=P48444,HUMAN|HGNC=291|UniProtKB=P30566,HUMAN|HGNC=8587|UniProtKB=P22234,HUMAN|HGNC=12666|UniProtKB=P55072,HUMAN|HGNC=2482|UniProtKB=P04080,HUMAN|HGNC=469|UniProtKB=Q01433,HUMAN|HGNC=11579|UniProtKB=O75347,HUMAN|HGNC=9813|UniProtKB=P54727,HUMAN|HGNC=8891|UniProtKB=P52209,HUMAN|HGNC=11767|UniProtKB=O43294,HUMAN|HGNC=4624|UniProtKB=P48637,HUMAN|HGNC=5237|UniProtKB=P34932,HUMAN|HGNC=12009|UniProtKB=P60174,HUMAN|HGNC=20063|UniProtKB=Q86T82,HUMAN|HGNC=20675|UniProtKB=Q96KN2,HUMAN|HGNC=794|UniProtKB=P31939,HUMAN|HGNC=343|UniProtKB=P23526,HUMAN|HGNC=9314|UniProtKB=Q08209,HUMAN|HGNC=255|UniProtKB=P28332,HUMAN|HGNC=380|UniProtKB=P14550,HUMAN|HGNC=6835|UniProtKB=P78559,HUMAN|Gene=EIF2S3L|UniProtKB=Q2VIR3,HUMAN|HGNC=16969|UniProtKB=Q92598,HUMAN|HGNC=8504|UniProtKB=Q969R2,HUMAN|HGNC=5241|UniProtKB=P11142,HUMAN|HGNC=8905|UniProtKB=P36871,HUMAN|HGNC=2678|UniProtKB=P14868,HUMAN|HGNC=1173|UniProtKB=Q5H9R7,HUMAN|HGNC=3353|UniProtKB=P09104,HUMAN|HGNC=3214|UniProtKB=P13639,HUMAN|HGNC=5461|UniProtKB=P78318,HUMAN|HGNC=12628|UniProtKB=P45974,HUMAN|HGNC=3208|UniProtKB=P24534,HUMAN|HGNC=9551|UniProtKB=P43686,HUMAN|HGNC=26378|UniProtKB=Q8N7C3,HUMAN|HGNC=8876|UniProtKB=P17858,HUMAN|HGNC=418|UniProtKB=P09972,HUMAN|HGNC=253|UniProtKB=P11766,HUMAN|HGNC=118|UniProtKB=Q99798,HUMAN|HGNC=30547|UniProtKB=Q96K17,H

|            |                                                                                                                                                                                                                                                                                                                                                                                                                                                                                                                                                                                                                                                                                       |                                                    |
|------------|---------------------------------------------------------------------------------------------------------------------------------------------------------------------------------------------------------------------------------------------------------------------------------------------------------------------------------------------------------------------------------------------------------------------------------------------------------------------------------------------------------------------------------------------------------------------------------------------------------------------------------------------------------------------------------------|----------------------------------------------------|
| GO:0003677 | UMAN HGNC=8783 UniProtKB=Q08499,HUMAN HGNC=20635 UniProtKB=Q14997,HUMAN HGNC=9559 UniProtKB=Q13200,HUMAN HGNC=8906 UniProtKB=Q96G03,HUMAN HGNC=25490 UniProtKB=Q96HA8,HUMAN HGNC=15912 UniProtKB=Q9UNZ2,HUMAN HGNC=251 UniProtKB=P00326,HUMAN HGNC=3354 UniProtKB=P13929,HUMAN HGNC=15818 UniProtKB=Q9H0Z9,HUMAN HGNC=5270 UniProtKB=P25685,HUMAN HGNC=4623 UniProtKB=P00390,HUMAN HGNC=26951 UniProtKB=Q86YL5,HUMAN HGNC=4823 UniProtKB=P69905,HUMAN HGNC=4829 UniProtKB=P02042,HUMAN HGNC=679 UniProtKB=P52566,HUMAN HGNC=3465 UniProtKB=P10768,HUMAN HGNC=4432 UniProtKB=P17174,HUMAN HGNC=117 UniProtKB=P21399,HUMAN HGNC=9553 UniProtKB=P62333,HUMAN HGNC=20076 UniProtKB=Q96K76 | DNA binding                                        |
| GO:0043248 | HUMAN HGNC=4747 UniProtKB=P58876,HUMAN HGNC=4750 UniProtKB=Q99879,HUMAN HGNC=13954 UniProtKB=O60814,HUMAN HGNC=4762 UniProtKB=P57053,HUMAN HGNC=20508 UniProtKB=Q8IUE6,HUMAN HGNC=4746 UniProtKB=P62807,HUMAN HGNC=20514 UniProtKB=Q8N257,HUMAN HGNC=17177 UniProtKB=Q8IUI8,HUMAN HGNC=4755 UniProtKB=Q93079,HUMAN HGNC=24700 UniProtKB=Q5QNW6,HUMAN HGNC=4749 UniProtKB=Q99877                                                                                                                                                                                                                                                                                                       |                                                    |
| GO:0070851 | HUMAN HGNC=9556 UniProtKB=O00231                                                                                                                                                                                                                                                                                                                                                                                                                                                                                                                                                                                                                                                      | proteasome assembly                                |
| PC00095    | HUMAN HGNC=19100 UniProtKB=Q5VWK5,HUMAN HGNC=11283 UniProtKB=P12931                                                                                                                                                                                                                                                                                                                                                                                                                                                                                                                                                                                                                   | growth factor receptor binding                     |
| GO:0048523 | HUMAN HGNC=25842 UniProtKB=Q6UWX4,HUMAN HGNC=15912 UniProtKB=Q9UNZ2,HUMAN HGNC=9411 UniProtKB=P14314                                                                                                                                                                                                                                                                                                                                                                                                                                                                                                                                                                                  | protein-binding activity modulator                 |
|            | HUMAN HGNC=17643 UniProtKB=Q9HD26                                                                                                                                                                                                                                                                                                                                                                                                                                                                                                                                                                                                                                                     | negative regulation of cellular process            |
| GO:0061650 | HUMAN HGNC=12488 UniProtKB=P68036,HUMAN HGNC=12491 UniProtKB=P61081,HUMAN HGNC=12492 UniProtKB=P61088,HUMAN HGNC=12476 UniProtKB=P61077,HUMAN HGNC=12475 UniProtKB=P62837,HUMAN HGNC=12494 UniProtKB=Q13404,HUMAN HGNC=17598 UniProtKB=Q9Y385                                                                                                                                                                                                                                                                                                                                                                                                                                         | ubiquitin-like protein conjugating enzyme activity |
| GO:0030139 | HUMAN HGNC=9785 UniProtKB=P51148,HUMAN HGNC=9784 UniProtKB=P61020,HUMAN HGNC=3244 UniProtKB=Q9NZN3,HUMAN HGNC=11358 UniProtKB=O75886,HUMAN HGNC=2092 UniProtKB=Q00610,HUMAN HGNC=561 UniProtKB=O95782,HUMAN HGNC=9788 UniProtKB=P51149                                                                                                                                                                                                                                                                                                                                                                                                                                                | endocytic vesicle                                  |
| GO:0009067 | HUMAN HGNC=4432 UniProtKB=P17174,HUMAN HGNC=7413 UniProtKB=Q13126                                                                                                                                                                                                                                                                                                                                                                                                                                                                                                                                                                                                                     | aspartate family amino acid biosynthetic process   |
| GO:0015081 | HUMAN HGNC=800 UniProtKB=P50993,HUMAN HGNC=806 UniProtKB=P54709                                                                                                                                                                                                                                                                                                                                                                                                                                                                                                                                                                                                                       | sodium ion transmembrane transporter activity      |
|            | HUMAN HGNC=28843 UniProtKB=Q9HC44,HUMAN HGNC=7803 UniProtKB=Q12986,HUMAN HGNC=19246 UniProtKB=Q9NYB0,HUMAN HGNC=18411 UniProtKB=Q3KNW1,HUMAN HGNC=29158 UniProtKB=Q9Y2G9,HUMAN HGNC=12347 UniProtKB=Q9Y4A5,HUMAN HGNC=25397 UniProtKB=Q6MZP7,HUMAN HGNC=1101 UniProtKB=P51587,HUMAN HGNC=10774 UniProtKB=P23246,HUMAN HGNC=7446 UniProtKB=Q9Y4I5,HUMAN HGNC=20250 UniProtKB=Q96IF1                                                                                                                                                                                                                                                                                                    | regulation of transcription, DNA-templated         |
| GO:0006355 | HUMAN HGNC=10372 UniProtKB=P05386,HUMAN HGNC=10404 UniProtKB=P15880,HUMAN HGNC=10363 UniProtKB=P18124,HUMAN HGNC=10385 UniProtKB=P25398,HUMAN HGNC=10396 Un                                                                                                                                                                                                                                                                                                                                                                                                                                                                                                                           | structural constituent of ribosome                 |

|            |                                                                                                                                                                                                                                                                     |                                                           |
|------------|---------------------------------------------------------------------------------------------------------------------------------------------------------------------------------------------------------------------------------------------------------------------|-----------------------------------------------------------|
|            | iProtKB=P62249,HUMAN HGNC=10305 UniProtKB=P50914,HUMAN HGNC=10353 UniProtKB=P36578                                                                                                                                                                                  |                                                           |
| GO:0006302 | HUMAN HGNC=23077 UniProtKB=Q96FW1,HUMAN HGNC=20473 UniProtKB=Q9BX63                                                                                                                                                                                                 | double-strand break repair                                |
| GO:0008013 | HUMAN HGNC=23688 UniProtKB=Q86UU0                                                                                                                                                                                                                                   | beta-catenin binding                                      |
| GO:0001654 | HUMAN HGNC=7002 UniProtKB=A6NDR6                                                                                                                                                                                                                                    | eye development                                           |
| GO:0008757 | HUMAN HGNC=23435 UniProtKB=Q8N4J0,HUMAN HGNC=8728 UniProtKB=P22061,HUMAN HGNC=26022 UniProtKB=Q7LOY3                                                                                                                                                                | S-adenosylmethionine-dependent methyltransferase activity |
| GO:0031346 | HUMAN HGNC=21295 UniProtKB=Q8TE68                                                                                                                                                                                                                                   | positive regulation of cell projection organization       |
| PC00133    | HUMAN HGNC=2062 UniProtKB=O00299,HUMAN HGNC=13518 UniProtKB=Q9Y696,HUMAN HGNC=22222 UniProtKB=Q9C0H2                                                                                                                                                                | ion channel                                               |
| PC00142    | HUMAN HGNC=4624 UniProtKB=P48637,HUMAN HGNC=2520 UniProtKB=Q9NRF8,HUMAN HGNC=871 UniProtKB=Q9UII2,HUMAN HGNC=4312 UniProtKB=P48507,HUMAN HGNC=24723 UniProtKB=Q9H6R3,HUMAN HGNC=1424 UniProtKB=P27708                                                               | ligase                                                    |
| GO:0008015 | HUMAN HGNC=11828 UniProtKB=Q9UDY2                                                                                                                                                                                                                                   | blood circulation                                         |
| GO:0000381 | HUMAN HGNC=5048 UniProtKB=Q00839                                                                                                                                                                                                                                    | regulation of alternative mRNA splicing, via spliceosome  |
| GO:0008088 | HUMAN HGNC=6325 UniProtKB=O60282,HUMAN HGNC=13206 UniProtKB=O60296                                                                                                                                                                                                  | axo-dendritic transport                                   |
| GO:0060191 | HUMAN HGNC=607 UniProtKB=P02654                                                                                                                                                                                                                                     | regulation of lipase activity                             |
| GO:0046470 | HUMAN HGNC=30244 UniProtKB=Q6P1A2,HUMAN HGNC=1869 UniProtKB=P11597                                                                                                                                                                                                  | phosphatidylcholine metabolic process                     |
| GO:0090305 | HUMAN HGNC=7326 UniProtKB=P20585,HUMAN HGNC=23845 UniProtKB=Q8IY92                                                                                                                                                                                                  | nucleic acid phosphodiester bond hydrolysis               |
| GO:0010494 | HUMAN HGNC=3282 UniProtKB=P60842                                                                                                                                                                                                                                    | cytoplasmic stress granule                                |
| GO:0002009 | HUMAN HGNC=12652 UniProtKB=P50552,HUMAN HGNC=25361 UniProtKB=Q8N264                                                                                                                                                                                                 | morphogenesis of an epithelium                            |
| GO:0009987 | HUMAN HGNC=4932 UniProtKB=P01889                                                                                                                                                                                                                                    | cellular process                                          |
| GO:0001819 | HUMAN HGNC=5261 UniProtKB=P10809,HUMAN HGNC=7183 UniProtKB=P41218,HUMAN HGNC=533 UniProtKB=P04083,HUMAN HGNC=1628 UniProtKB=P08571,HUMAN HGNC=6517 UniProtKB=P18428,HUMAN HGNC=16961 UniProtKB=Q15762                                                               | positive regulation of cytokine production                |
| GO:0030018 | HUMAN HGNC=2067 UniProtKB=O00151,HUMAN HGNC=7618 UniProtKB=O14974,HUMAN HGNC=17468 UniProtKB=Q96HC4,HUMAN HGNC=22958 UniProtKB=Q9NR12                                                                                                                               | Z disc                                                    |
| GO:0001708 | HUMAN HGNC=11594 UniProtKB=Q96SF7,HUMAN HGNC=14010 UniProtKB=Q8IW19,HUMAN HGNC=11590 UniProtKB=Q16650                                                                                                                                                               | cell fate specification                                   |
| GO:0008483 | HUMAN HGNC=4432 UniProtKB=P17174,HUMAN HGNC=4242 UniProtKB=O94808,HUMAN HGNC=4433 UniProtKB=P00505                                                                                                                                                                  | transaminase activity                                     |
| GO:0016477 | HUMAN HGNC=9862 UniProtKB=P61225,HUMAN HGNC=6156 UniProtKB=P05106,HUMAN HGNC=11148 UniProtKB=Q16658,HUMAN HGNC=6153 UniProtKB=P05556,HUMAN HGNC=25361 UniProtKB=Q8N264,HUMAN HGNC=667 UniProtKB=P61586,HUMAN HGNC=2252 UniProtKB=P31146,HUMAN HGNC=10661 UniProtKB= | cell migration                                            |

|            |                                                                                                                                                                                                                                                                                                                                                                                                                                                                                                                                                                                    |                                                                         |
|------------|------------------------------------------------------------------------------------------------------------------------------------------------------------------------------------------------------------------------------------------------------------------------------------------------------------------------------------------------------------------------------------------------------------------------------------------------------------------------------------------------------------------------------------------------------------------------------------|-------------------------------------------------------------------------|
|            | P31431,HUMAN HGNC=1736 UniProtKB=P60953,HUMAN HGNC=544 UniProtKB=P08133,HUMAN HGNC=9065 UniProtKB=P19174,HUMAN HGNC=15878 UniProtKB=Q9NQ75,HUMAN HGNC=2254 UniProtKB=Q9ULV4,HUMAN HGNC=2253 UniProtKB=Q9BR76,HUMAN HGNC=11881 UniProtKB=P62328,HUMAN HGNC=708 UniProtKB=O15511                                                                                                                                                                                                                                                                                                     |                                                                         |
| GO:0000783 | HUMAN HGNC=19246 UniProtKB=Q9NYB0                                                                                                                                                                                                                                                                                                                                                                                                                                                                                                                                                  | nuclear telomere cap complex                                            |
| GO:0050806 | HUMAN HGNC=1406 UniProtKB=Q9Y698,HUMAN HGNC=15474 UniProtKB=Q9Y566,HUMAN HGNC=14294 UniProtKB=Q9BYB0                                                                                                                                                                                                                                                                                                                                                                                                                                                                               | positive regulation of synaptic transmission                            |
| GO:0034067 | HUMAN HGNC=1908 UniProtKB=Q96RL7,HUMAN HGNC=23594 UniProtKB=Q709C8                                                                                                                                                                                                                                                                                                                                                                                                                                                                                                                 | protein localization to Golgi apparatus                                 |
| GO:0006464 | HUMAN HGNC=3531 UniProtKB=P00488,HUMAN HGNC=25490 UniProtKB=Q96HA8,HUMAN HGNC=16369 UniProtKB=Q99497,HUMAN HGNC=3951 UniProtKB=Q16595                                                                                                                                                                                                                                                                                                                                                                                                                                              | cellular protein modification process                                   |
|            | HUMAN HGNC=18587 UniProtKB=O94901,HUMAN HGNC=11442 UniProtKB=O15400,HUMAN HGNC=7641 UniProtKB=P54920,HUMAN HGNC=11429 UniProtKB=O75558,HUMAN HGNC=12644 UniProtKB=Q15836,HUMAN HGNC=11131 UniProtKB=O00161,HUMAN HGNC=555 UniProtKB=O43747,HUMAN HGNC=12647 UniProtKB=Q9BV40,HUMAN HGNC=13667 UniProtKB=Q9BXS5,HUMAN HGNC=561 UniProtKB=O95782,HUMAN HGNC=11075 UniProtKB=O14745,HUMAN HGNC=492 UniProtKB=P16157                                                                                                                                                                   |                                                                         |
| GO:0030674 | HUMAN HGNC=8876 UniProtKB=P17858,HUMAN HGNC=9465 UniProtKB=P11908,HUMAN HGNC=8878 UniProtKB=Q01813,HUMAN HGNC=9462 UniProtKB=P60891                                                                                                                                                                                                                                                                                                                                                                                                                                                | protein-macromolecule adaptor activity                                  |
| GO:0061695 |                                                                                                                                                                                                                                                                                                                                                                                                                                                                                                                                                                                    | transferase complex, transferring phosphorus-containing groups          |
| GO:0000079 | HUMAN HGNC=18673 UniProtKB=Q96JB5                                                                                                                                                                                                                                                                                                                                                                                                                                                                                                                                                  | regulation of cyclin-dependent protein serine/threonine kinase activity |
|            | HUMAN HGNC=1736 UniProtKB=P60953,HUMAN HGNC=3537 UniProtKB=P25116,HUMAN HGNC=4381 UniProtKB=Q14344,HUMAN HGNC=10252 UniProtKB=O75116,HUMAN HGNC=679 UniProtKB=P52566,HUMAN HGNC=4472 UniProtKB=Q14330,HUMAN HGNC=21295 UniProtKB=Q8TE68,HUMAN HGNC=3540 UniProtKB=Q96RI0,HUMAN HGNC=678 UniProtKB=P52565                                                                                                                                                                                                                                                                           |                                                                         |
| GO:0007266 | HUMAN HGNC=7687 UniProtKB=O00483,HUMAN HGNC=3481 UniProtKB=P13804,HUMAN HGNC=9355 UniProtKB=P30044,HUMAN HGNC=7421 UniProtKB=P00403,HUMAN HGNC=2898 UniProtKB=P09622,HUMAN HGNC=7716 UniProtKB=P49821,HUMAN HGNC=2753 UniProtKB=Q16698,HUMAN HGNC=3482 UniProtKB=P38117,HUMAN HGNC=6984 UniProtKB=P23368,HUMAN HGNC=4800 UniProtKB=Q99714,HUMAN HGNC=11179 UniProtKB=P00441,HUMAN HGNC=11180 UniProtKB=P04179,HUMAN HGNC=12436 UniProtKB=O43396,HUMAN HGNC=121 UniProtKB=O15254,HUMAN HGNC=3542 UniProtKB=P12259,HUMAN HGNC=119 UniProtKB=Q15067,HUMAN HGNC=17772 UniProtKB=Q99757 | Rho protein signal transduction                                         |
| PC00176    | HUMAN HGNC=23077 UniProtKB=Q96FW1,HUMAN HGNC=12492 UniProtKB=P61088,HUMAN HGNC=12494 UniProtKB=Q13404,HUMAN HGNC=16804 UniProtKB=O00308                                                                                                                                                                                                                                                                                                                                                                                                                                            | oxidoreductase                                                          |
| GO:0070534 | HUMAN HGNC=1908 UniProtKB=Q96RL7,HUMAN HGNC=23594 UniProtKB=Q709C8                                                                                                                                                                                                                                                                                                                                                                                                                                                                                                                 | protein K63-linked ubiquitination                                       |
| GO:0019898 | HUMAN HGNC=26639 UniProtKB=Q8NBI6,HUMAN HGNC=30004 UniProtKB=P0DMN0,HUMAN HGNC=626 UniProtKB=P07741,HUMAN HGNC=119 UniProtKB=Q15067,HUMAN HGNC=17772 UniProtKB=Q99757                                                                                                                                                                                                                                                                                                                                                                                                              | extrinsic component of membrane                                         |
| PC00220    |                                                                                                                                                                                                                                                                                                                                                                                                                                                                                                                                                                                    | transferase                                                             |

|            |                                                                                                                                                                                                                                                                                                                                                                                                                                                                                                                                                                                                                                                                                                                                                                                                                                                                                                                                                                                                                                                                                                                                                                                                                                                                                                                                                                                                                                      |                                                        |
|------------|--------------------------------------------------------------------------------------------------------------------------------------------------------------------------------------------------------------------------------------------------------------------------------------------------------------------------------------------------------------------------------------------------------------------------------------------------------------------------------------------------------------------------------------------------------------------------------------------------------------------------------------------------------------------------------------------------------------------------------------------------------------------------------------------------------------------------------------------------------------------------------------------------------------------------------------------------------------------------------------------------------------------------------------------------------------------------------------------------------------------------------------------------------------------------------------------------------------------------------------------------------------------------------------------------------------------------------------------------------------------------------------------------------------------------------------|--------------------------------------------------------|
|            | MAN HGNC=8527 UniProtKB=P55809,HUMAN HGNC=10869 UniProtKB=Q92185,HUMAN HGNC=12388 UniProtKB=Q16762,HUMAN HGNC=7223 UniProtKB=P25325,HUMAN HGNC=4635 UniProtKB=P21266,HUMAN HGNC=1801 UniProtKB=O95674,HUMAN HGNC=2422 UniProtKB=O75390,HUMAN HGNC=11453 UniProtKB=P50225,HUMAN HGNC=3531 UniProtKB=P00488,HUMAN HGNC=2911 UniProtKB=P36957,HUMAN HGNC=4634 UniProtKB=P28161,HUMAN HGNC=4632 UniProtKB=P09488,HUMAN HGNC=16906 UniProtKB=Q9Y2Q3,HUMAN HGNC=4638 UniProtKB=P09211,HUMAN HGNC=115 UniProtKB=P53396                                                                                                                                                                                                                                                                                                                                                                                                                                                                                                                                                                                                                                                                                                                                                                                                                                                                                                                      |                                                        |
| GO:0051053 | HUMAN HGNC=5048 UniProtKB=Q00839<br>HUMAN HGNC=4827 UniProtKB=P68871,HUMAN HGNC=6401 UniProtKB=Q92973,HUMAN HGNC=2431 UniProtKB=P55060,HUMAN HGNC=4831 UniProtKB=P69891,HUMAN HGNC=4823 UniProtKB=P69905,HUMAN HGNC=4829 UniProtKB=P02042,HUMAN HGNC=6396 UniProtKB=O00505,HUMAN HGNC=6400 UniProtKB=Q14974                                                                                                                                                                                                                                                                                                                                                                                                                                                                                                                                                                                                                                                                                                                                                                                                                                                                                                                                                                                                                                                                                                                          | negative regulation of DNA metabolic process           |
| GO:0005215 | HUMAN HGNC=20165 UniProtKB=Q9P2P1,HUMAN HGNC=17904 UniProtKB=Q9NRR4                                                                                                                                                                                                                                                                                                                                                                                                                                                                                                                                                                                                                                                                                                                                                                                                                                                                                                                                                                                                                                                                                                                                                                                                                                                                                                                                                                  | transporter activity                                   |
| PC00094    |                                                                                                                                                                                                                                                                                                                                                                                                                                                                                                                                                                                                                                                                                                                                                                                                                                                                                                                                                                                                                                                                                                                                                                                                                                                                                                                                                                                                                                      | endoribonuclease                                       |
| GO:0004866 | HUMAN HGNC=3658 UniProtKB=Q9UGM5,HUMAN HGNC=11820 UniProtKB=P01033,HUMAN HGNC=9750 UniProtKB=P20742 UniProtKB=55 UniProtKB=O15439,HUMAN HGNC=14637 UniProtKB=Q86UK0                                                                                                                                                                                                                                                                                                                                                                                                                                                                                                                                                                                                                                                                                                                                                                                                                                                                                                                                                                                                                                                                                                                                                                                                                                                                  | endopeptidase inhibitor activity                       |
| PC00003    |                                                                                                                                                                                                                                                                                                                                                                                                                                                                                                                                                                                                                                                                                                                                                                                                                                                                                                                                                                                                                                                                                                                                                                                                                                                                                                                                                                                                                                      | ATP-binding cassette (ABC) transporter                 |
| GO:0031966 | HUMAN HGNC=2973 UniProtKB=O00429,HUMAN HGNC=2974 UniProtKB=P50570,HUMAN HGNC=29125 UniProtKB=Q9UQ16                                                                                                                                                                                                                                                                                                                                                                                                                                                                                                                                                                                                                                                                                                                                                                                                                                                                                                                                                                                                                                                                                                                                                                                                                                                                                                                                  | mitochondrial membrane protein tyrosine kinase binding |
| GO:1990782 | HUMAN HGNC=18233 UniProtKB=Q8NDB2<br>HUMAN HGNC=5575 UniProtKB=A0A0B4J1V2,HUMAN HGNC=5645 UniProtKB=A0A0C4DH34,HUMAN HGNC=5549 UniProtKB=A0A0C4DH31,HUMAN HGNC=5554 UniProtKB=P01743,HUMAN HGNC=5480 UniProtKB=P01880,HUMAN HGNC=5659 UniProtKB=A0A0C4DH38,HUMAN HGNC=5634 UniProtKB=A0A075B7F0,HUMAN HGNC=38476 UniProtKB=B9A064,HUMAN HGNC=5861 UniProtKB=A0M8Q6,HUMAN HGNC=5647 UniProtKB=A0A087WSY4,HUMAN HGNC=5563 UniProtKB=A0A075B7D0,HUMAN HGNC=5856 UniProtKB=P0DOY2,HUMAN HGNC=2367 UniProtKB=P02741,HUMAN HGNC=5606 UniProtKB=P01763,HUMAN HGNC=5576 UniProtKB=P01817,HUMAN HGNC=5528 UniProtKB=P01861,HUMAN HGNC=5541 UniProtKB=P01871,HUMAN HGNC=5585 UniProtKB=A0A0C4DH32,HUMAN HGNC=5551 UniProtKB=A0A0C4DH33,HUMAN HGNC=5526 UniProtKB=P01859,HUMAN HGNC=5657 UniProtKB=P0DP08,HUMAN Ensembl=ENSG00000282639 UniProtKB=A0A0J9YX35,HUMAN Gene=HV309_HUMAN UniProtKB=P01782,HUMAN HGNC=5654 UniProtKB=P01825,HUMAN HGNC=5553 UniProtKB=A0A0A0MS14,HUMAN Gene=HV108_HUMAN UniProtKB=P0DP01,HUMAN HGNC=5624 UniProtKB=A0A0B4J1X5,HUMAN HGNC=5620 UniProtKB=P01780,HUMAN HGNC=5598 UniProtKB=A0A0C4DH35,HUMAN HGNC=5580 UniProtKB=P01762,HUMAN HGNC=5633 UniProtKB=A0A075B7D8,HUMAN HGNC=5582 UniProtKB=A0A0B4J1V0,HUMAN HGNC=5478 UniProtKB=P01876,HUMAN HGNC=5617 UniProtKB=A0A075B6Q5,HUMAN HGNC=5594 UniProtKB=P0DP03,HUMAN HGNC=5655 UniProtKB=A0A0C4DH41,HUMAN HGNC=5636 UniProtKB=A0A075B7B8,HUMAN HGNC=5586 UniPr | lymphocyte mediated immunity                           |
| GO:0002449 |                                                                                                                                                                                                                                                                                                                                                                                                                                                                                                                                                                                                                                                                                                                                                                                                                                                                                                                                                                                                                                                                                                                                                                                                                                                                                                                                                                                                                                      |                                                        |

|            |                                                                                                                                                                                                                                                                                                                                                                                                                                                                                                                                                                                                                                                                                                                                              |                                                                              |
|------------|----------------------------------------------------------------------------------------------------------------------------------------------------------------------------------------------------------------------------------------------------------------------------------------------------------------------------------------------------------------------------------------------------------------------------------------------------------------------------------------------------------------------------------------------------------------------------------------------------------------------------------------------------------------------------------------------------------------------------------------------|------------------------------------------------------------------------------|
|            | otKB=A0A0B4J1V1,HUMAN HGNC=5581 UniProtKB=P01766,HUMAN HGNC=5622 UniProtKB=A0A0B4J1Y9,HUMAN HGNC=5652 UniProtKB=A0A075B6R2,HUMAN HGNC=5593 UniProtKB=P0DP02,HUMAN HGNC=5479 UniProtKB=P01877,HUMAN HGNC=5619 UniProtKB=A0A0C4DH42,HUMAN HGNC=5596 UniProtKB=P01772,HUMAN HGNC=5550 UniProtKB=P23083,HUMAN HGNC=5604 UniProtKB=A0A0B4J1X8,HUMAN HGNC=5525 UniProtKB=P01857,HUMAN HGNC=5662 UniProtKB=A0A0B4J1U7,HUMAN HGNC=16961 UniProtKB=Q15762,HUMAN HGNC=5601 UniProtKB=A0A0C4DH36,HUMAN HGNC=5716 UniProtKB=P01834,HUMAN HGNC=5588 UniProtKB=P01764,HUMAN HGNC=5857 UniProtKB=P0DOY3,HUMAN HGNC=5610 UniProtKB=P01767,HUMAN Ensembl=ENSG0000282150 UniProtKB=A0A0J9YY99,HUMAN HGNC=5527 UniProtKB=P01860,HUMAN HGNC=584 UniProtKB=P02743 |                                                                              |
| GO:0098794 | HUMAN HGNC=9536 UniProtKB=O14818,HUMAN HGNC=2090 UniProtKB=P09496                                                                                                                                                                                                                                                                                                                                                                                                                                                                                                                                                                                                                                                                            | postsynapse                                                                  |
| GO:0001705 | HUMAN HGNC=2188 UniProtKB=Q99715                                                                                                                                                                                                                                                                                                                                                                                                                                                                                                                                                                                                                                                                                                             | ectoderm formation<br>mitochondrial proton-transporting ATP synthase complex |
| GO:0005753 | HUMAN HGNC=846 UniProtKB=P56385,HUMAN HGNC=830 UniProtKB=P06576                                                                                                                                                                                                                                                                                                                                                                                                                                                                                                                                                                                                                                                                              |                                                                              |
| GO:0007202 | HUMAN HGNC=3537 UniProtKB=P25116,HUMAN HGNC=4472 UniProtKB=Q14330,HUMAN HGNC=4390 UniProtKB=P50148,HUMAN HGNC=3540 UniProtKB=Q96R10                                                                                                                                                                                                                                                                                                                                                                                                                                                                                                                                                                                                          | activation of phospholipase C activity                                       |
| GO:0043044 | HUMAN HGNC=17780 UniProtKB=Q562R1                                                                                                                                                                                                                                                                                                                                                                                                                                                                                                                                                                                                                                                                                                            | ATP-dependent chromatin remodeling                                           |
| GO:0016301 | HUMAN HGNC=8898 UniProtKB=P07205,HUMAN HGNC=24552 UniProtKB=Q3LXA3,HUMAN HGNC=29035 UniProtKB=O43314,HUMAN HGNC=9141 UniProtKB=Q15126,HUMAN HGNC=9021 UniProtKB=P14618,HUMAN HGNC=24822 UniProtKB=Q9H479,HUMAN HGNC=2850 UniProtKB=Q9Y6T7                                                                                                                                                                                                                                                                                                                                                                                                                                                                                                    | kinase activity                                                              |
| GO:0043484 | HUMAN HGNC=27424 UniProtKB=Q5T481,HUMAN HGNC=5043 UniProtKB=P31942,HUMAN HGNC=17894 UniProtKB=Q14966,HUMAN HGNC=347 UniProtKB=Q09666                                                                                                                                                                                                                                                                                                                                                                                                                                                                                                                                                                                                         | regulation of RNA splicing                                                   |
| GO:0017053 | HUMAN HGNC=29989 UniProtKB=Q86YP4                                                                                                                                                                                                                                                                                                                                                                                                                                                                                                                                                                                                                                                                                                            | transcription repressor complex                                              |
| GO:0046033 | HUMAN HGNC=626 UniProtKB=P07741,HUMAN HGNC=469 UniProtKB=Q01433,HUMAN HGNC=291 UniProtKB=P30566                                                                                                                                                                                                                                                                                                                                                                                                                                                                                                                                                                                                                                              | AMP metabolic process                                                        |
| GO:1901224 | HUMAN HGNC=1628 UniProtKB=P08571,HUMAN HGNC=3157 UniProtKB=Q92838                                                                                                                                                                                                                                                                                                                                                                                                                                                                                                                                                                                                                                                                            | positive regulation of NIK/NF-kappaB signaling                               |
| GO:0005925 | HUMAN HGNC=6616 UniProtKB=P48059,HUMAN HGNC=6156 UniProtKB=P05106,HUMAN HGNC=13200 UniProtKB=Q15942,HUMAN HGNC=6153 UniProtKB=P05556,HUMAN HGNC=6513 UniProtKB=Q14847,HUMAN HGNC=11845 UniProtKB=Q9Y490,HUMAN HGNC=25361 UniProtKB=Q8N264,HUMAN HGNC=15447 UniProtKB=Q9Y4G6,HUMAN HGNC=14653 UniProtKB=Q9HBI1,HUMAN HGNC=11767 UniProtKB=O43294,HUMAN HGNC=1090 UniProtKB=Q03001,HUMAN HGNC=3338 UniProtKB=Q14247,HUMAN HGNC=243 UniProtKB=P35611,HUMAN HGNC=544 UniProtKB=P08133,HUMAN HGNC=9069 UniProtKB=Q15149,HUMAN HGNC=6040 UniProtKB=Q13418                                                                                                                                                                                          | focal adhesion                                                               |
| GO:0006624 | HUMAN HGNC=9472 UniProtKB=Q99538                                                                                                                                                                                                                                                                                                                                                                                                                                                                                                                                                                                                                                                                                                             | vacuolar protein processing                                                  |

|           |   |                                                                                                                                                                                                                                                                                                                                                                                                                                                                                                                                                                                                                                                                                                                                                                                                                                                                                                                                                                                                                                                                                                                                                                                                                                                                                                                                                                                                                                                                                                                                                                                                                                                                                                                                                                                                                                                                                                                                                                                                                                                                                                                                                                                                                                                                                                                                                                                                                                                                                                                                                  |                                                                  |
|-----------|---|--------------------------------------------------------------------------------------------------------------------------------------------------------------------------------------------------------------------------------------------------------------------------------------------------------------------------------------------------------------------------------------------------------------------------------------------------------------------------------------------------------------------------------------------------------------------------------------------------------------------------------------------------------------------------------------------------------------------------------------------------------------------------------------------------------------------------------------------------------------------------------------------------------------------------------------------------------------------------------------------------------------------------------------------------------------------------------------------------------------------------------------------------------------------------------------------------------------------------------------------------------------------------------------------------------------------------------------------------------------------------------------------------------------------------------------------------------------------------------------------------------------------------------------------------------------------------------------------------------------------------------------------------------------------------------------------------------------------------------------------------------------------------------------------------------------------------------------------------------------------------------------------------------------------------------------------------------------------------------------------------------------------------------------------------------------------------------------------------------------------------------------------------------------------------------------------------------------------------------------------------------------------------------------------------------------------------------------------------------------------------------------------------------------------------------------------------------------------------------------------------------------------------------------------------|------------------------------------------------------------------|
| GO:003250 | 6 | HUMAN HGNC=535 UniProtKB=P50995                                                                                                                                                                                                                                                                                                                                                                                                                                                                                                                                                                                                                                                                                                                                                                                                                                                                                                                                                                                                                                                                                                                                                                                                                                                                                                                                                                                                                                                                                                                                                                                                                                                                                                                                                                                                                                                                                                                                                                                                                                                                                                                                                                                                                                                                                                                                                                                                                                                                                                                  | cytokinetic process                                              |
| GO:000469 | 3 | HUMAN HGNC=24224 UniProtKB=Q9NYV4<br>HUMAN HGNC=29158 UniProtKB=Q9Y2G9,HUMAN HGNC=20635<br> UniProtKB=Q14997,HUMAN HGNC=7133 UniProtKB=O14686,HUMAN HGNC=10760 UniProtKB=Q01105,HUMAN HGNC=7640 UniProtKB=Q99733,HUMAN HGNC=42937 UniProtKB=P0DME0,HUMAN HGNC=13726 UniProtKB=Q8NEZ4,HUMAN HGNC=7910 UniProtKB=P06748,HUMAN HGNC=24358 UniProtKB=Q9H2G4<br>HUMAN HGNC=11364 UniProtKB=P40763,HUMAN HGNC=12841<br> UniProtKB=P07947,HUMAN HGNC=29884 UniProtKB=Q8TF42,HUMAN HGNC=6735 UniProtKB=P07948,HUMAN HGNC=4037 UniProtKB=P06241,HUMAN HGNC=2209 UniProtKB=P20908,HUMAN HGNC=1692 UniProtKB=P08962,HUMAN HGNC=6529 UniProtKB=Q13094,HUMAN HGNC=19296 UniProtKB=Q9UF33,HUMAN HGNC=15878 UniProtKB=Q9NQ75,HUMAN HGNC=10840 UniProtKB=P29353,HUMAN HGNC=7178 UniProtKB=Q13201,HUMAN HGNC=6091 UniProtKB=P06213<br>HUMAN HGNC=7687 UniProtKB=O00483,HUMAN HGNC=7421 UniProtKB=P00403,HUMAN HGNC=3482 UniProtKB=P38117,HUMAN HGNC=2267 UniProtKB=P20674<br>HUMAN HGNC=30167 UniProtKB=P13667,HUMAN HGNC=30178<br> UniProtKB=Q9Y570,HUMAN HGNC=16369 UniProtKB=Q99497,HUMAN HGNC=28959 UniProtKB=Q14008,HUMAN HGNC=8548 UniProtKB=P07237,HUMAN HGNC=8988 UniProtKB=Q13526,HUMAN HGNC=4606 UniProtKB=P30101,HUMAN HGNC=3531 UniProtKB=P00488,HUMAN HGNC=6737 UniProtKB=O75608,HUMAN HGNC=9756 UniProtKB=O00391,HUMAN HGNC=14683 UniProtKB=Q9Y2G5,HUMAN HGNC=26664 UniProtKB=Q8N841,HUMAN HGNC=8127 UniProtKB=O15294,HUMAN HGNC=18039 UniProtKB=Q9UGL1<br>HUMAN HGNC=20040 UniProtKB=Q01518,HUMAN HGNC=2067 UniProtKB=O00151,HUMAN HGNC=9944 UniProtKB=P35241,HUMAN HGNC=13200 UniProtKB=Q15942,HUMAN HGNC=12691 UniProtKB=P15311,HUMAN HGNC=8765 UniProtKB=O75340,HUMAN HGNC=29827 UniProtKB=O14950,HUMAN HGNC=11767 UniProtKB=O43294,HUMAN HGNC=9581 UniProtKB=Q9H939,HUMAN HGNC=12736 UniProtKB=O43516,HUMAN HGNC=706 UniProtKB=O15145,HUMAN HGNC=11873 UniProtKB=Q9NYL9,HUMAN HGNC=16701 UniProtKB=P19105,HUMAN HGNC=3382 UniProtKB=Q08495,HUMAN HGNC=17468 UniProtKB=Q96HC4,HUMAN HGNC=7373 UniProtKB=P26038,HUMAN HGNC=704 UniProtKB=O15143,HUMAN HGNC=15754 UniProtKB=P24844,HUMAN HGNC=22958 UniProtKB=Q9NR12,HUMAN HGNC=24636 UniProtKB=Q9UHB6,HUMAN HGNC=707 UniProtKB=P59998,HUMAN HGNC=708 UniProtKB=O15511<br>HUMAN HGNC=5575 UniProtKB=A0A0B4J1V2,HUMAN HGNC=5645 UniProtKB=A0A0C4DH34,HUMAN HGNC=4932 UniProtKB=P01889,HUMAN HGNC=5549 UniProtKB=A0A0C4DH31,HUMAN HGNC=5554 UniProtKB=P01743,HUMAN HGNC=5480 UniProtKB=P01880,HUMAN HGNC=5659 UniProtKB=A0A0C4DH38,HUMAN HGNC=5634 UniProtKB=A0A075B7F0,HUMAN HGNC=12841 UniProtKB= | cyclin-dependent protein serine/threonine kinase activity        |
| GO:004239 | 3 |                                                                                                                                                                                                                                                                                                                                                                                                                                                                                                                                                                                                                                                                                                                                                                                                                                                                                                                                                                                                                                                                                                                                                                                                                                                                                                                                                                                                                                                                                                                                                                                                                                                                                                                                                                                                                                                                                                                                                                                                                                                                                                                                                                                                                                                                                                                                                                                                                                                                                                                                                  | histone binding                                                  |
| GO:000716 | 9 |                                                                                                                                                                                                                                                                                                                                                                                                                                                                                                                                                                                                                                                                                                                                                                                                                                                                                                                                                                                                                                                                                                                                                                                                                                                                                                                                                                                                                                                                                                                                                                                                                                                                                                                                                                                                                                                                                                                                                                                                                                                                                                                                                                                                                                                                                                                                                                                                                                                                                                                                                  | transmembrane receptor protein tyrosine kinase signaling pathway |
| GO:000905 | 5 |                                                                                                                                                                                                                                                                                                                                                                                                                                                                                                                                                                                                                                                                                                                                                                                                                                                                                                                                                                                                                                                                                                                                                                                                                                                                                                                                                                                                                                                                                                                                                                                                                                                                                                                                                                                                                                                                                                                                                                                                                                                                                                                                                                                                                                                                                                                                                                                                                                                                                                                                                  | electron transfer activity                                       |
| GO:014009 | 6 |                                                                                                                                                                                                                                                                                                                                                                                                                                                                                                                                                                                                                                                                                                                                                                                                                                                                                                                                                                                                                                                                                                                                                                                                                                                                                                                                                                                                                                                                                                                                                                                                                                                                                                                                                                                                                                                                                                                                                                                                                                                                                                                                                                                                                                                                                                                                                                                                                                                                                                                                                  | catalytic activity, acting on a protein                          |
| PC00041   |   |                                                                                                                                                                                                                                                                                                                                                                                                                                                                                                                                                                                                                                                                                                                                                                                                                                                                                                                                                                                                                                                                                                                                                                                                                                                                                                                                                                                                                                                                                                                                                                                                                                                                                                                                                                                                                                                                                                                                                                                                                                                                                                                                                                                                                                                                                                                                                                                                                                                                                                                                                  | actin or actin-binding cytoskeletal protein                      |
| GO:009747 | 8 |                                                                                                                                                                                                                                                                                                                                                                                                                                                                                                                                                                                                                                                                                                                                                                                                                                                                                                                                                                                                                                                                                                                                                                                                                                                                                                                                                                                                                                                                                                                                                                                                                                                                                                                                                                                                                                                                                                                                                                                                                                                                                                                                                                                                                                                                                                                                                                                                                                                                                                                                                  | leaflet of membrane bilayer                                      |

GO:000726  
9  
GO:003419  
8  
GO:000823  
4

neurotransmitter secretion  
cellular response to amino  
acid starvation  
cysteine-type peptidase  
activity

|           |                                                                                                                                                                                                                                                                                                                                                                                                                                                                                                                                                                                                                                                                                                                                                                                                                                                                                                                                                                                                                                                                                                                                                                                                                                                                                                                                                                                                                                           |                                                           |
|-----------|-------------------------------------------------------------------------------------------------------------------------------------------------------------------------------------------------------------------------------------------------------------------------------------------------------------------------------------------------------------------------------------------------------------------------------------------------------------------------------------------------------------------------------------------------------------------------------------------------------------------------------------------------------------------------------------------------------------------------------------------------------------------------------------------------------------------------------------------------------------------------------------------------------------------------------------------------------------------------------------------------------------------------------------------------------------------------------------------------------------------------------------------------------------------------------------------------------------------------------------------------------------------------------------------------------------------------------------------------------------------------------------------------------------------------------------------|-----------------------------------------------------------|
|           | MAN HGNC=2482 UniProtKB=P04080,HUMAN HGNC=4248 UniProtKB=Q92820                                                                                                                                                                                                                                                                                                                                                                                                                                                                                                                                                                                                                                                                                                                                                                                                                                                                                                                                                                                                                                                                                                                                                                                                                                                                                                                                                                           |                                                           |
| GO:000640 |                                                                                                                                                                                                                                                                                                                                                                                                                                                                                                                                                                                                                                                                                                                                                                                                                                                                                                                                                                                                                                                                                                                                                                                                                                                                                                                                                                                                                                           |                                                           |
| 1         | HUMAN HGNC=30646 UniProtKB=Q7KZF4                                                                                                                                                                                                                                                                                                                                                                                                                                                                                                                                                                                                                                                                                                                                                                                                                                                                                                                                                                                                                                                                                                                                                                                                                                                                                                                                                                                                         | RNA catabolic process                                     |
| GO:003018 |                                                                                                                                                                                                                                                                                                                                                                                                                                                                                                                                                                                                                                                                                                                                                                                                                                                                                                                                                                                                                                                                                                                                                                                                                                                                                                                                                                                                                                           |                                                           |
| 3         | HUMAN HGNC=11491 UniProtKB=P43405                                                                                                                                                                                                                                                                                                                                                                                                                                                                                                                                                                                                                                                                                                                                                                                                                                                                                                                                                                                                                                                                                                                                                                                                                                                                                                                                                                                                         | B cell differentiation                                    |
|           | HUMAN HGNC=15750 UniProtKB=P60981,HUMAN HGNC=17780                                                                                                                                                                                                                                                                                                                                                                                                                                                                                                                                                                                                                                                                                                                                                                                                                                                                                                                                                                                                                                                                                                                                                                                                                                                                                                                                                                                        |                                                           |
| GO:004887 | UniProtKB=Q562R1,HUMAN HGNC=18271 UniProtKB=Q8N8S7,HUMAN HGNC=1874 UniProtKB=P23528                                                                                                                                                                                                                                                                                                                                                                                                                                                                                                                                                                                                                                                                                                                                                                                                                                                                                                                                                                                                                                                                                                                                                                                                                                                                                                                                                       | cell motility                                             |
| 0         |                                                                                                                                                                                                                                                                                                                                                                                                                                                                                                                                                                                                                                                                                                                                                                                                                                                                                                                                                                                                                                                                                                                                                                                                                                                                                                                                                                                                                                           | cellular monovalent inorganic cation homeostasis          |
| GO:003000 | HUMAN HGNC=800 UniProtKB=P50993,HUMAN HGNC=806 UniProtKB=P54709                                                                                                                                                                                                                                                                                                                                                                                                                                                                                                                                                                                                                                                                                                                                                                                                                                                                                                                                                                                                                                                                                                                                                                                                                                                                                                                                                                           |                                                           |
| 4         | HUMAN HGNC=1406 UniProtKB=Q9Y698,HUMAN HGNC=7641 UniProtKB=P54920,HUMAN HGNC=15474 UniProtKB=Q9Y566,HUMAN HGNC=14294 UniProtKB=Q9BYB0                                                                                                                                                                                                                                                                                                                                                                                                                                                                                                                                                                                                                                                                                                                                                                                                                                                                                                                                                                                                                                                                                                                                                                                                                                                                                                     | synaptic transmission, glutamatergic                      |
| GO:003524 |                                                                                                                                                                                                                                                                                                                                                                                                                                                                                                                                                                                                                                                                                                                                                                                                                                                                                                                                                                                                                                                                                                                                                                                                                                                                                                                                                                                                                                           |                                                           |
| 9         | HUMAN HGNC=11891 UniProtKB=P05452,HUMAN HGNC=3153 UniProtKB=Q16610                                                                                                                                                                                                                                                                                                                                                                                                                                                                                                                                                                                                                                                                                                                                                                                                                                                                                                                                                                                                                                                                                                                                                                                                                                                                                                                                                                        | bone mineralization                                       |
| GO:003028 |                                                                                                                                                                                                                                                                                                                                                                                                                                                                                                                                                                                                                                                                                                                                                                                                                                                                                                                                                                                                                                                                                                                                                                                                                                                                                                                                                                                                                                           |                                                           |
| 2         | HUMAN HGNC=16695 UniProtKB=P51572,HUMAN HGNC=20726 UniProtKB=Q8WVM8,HUMAN HGNC=2230 UniProtKB=P53621,HUMAN HGNC=21354 UniProtKB=Q86XR7,HUMAN HGNC=24251 UniProtKB=Q9Y3A6,HUMAN HGNC=2231 UniProtKB=P53618,HUMAN HGNC=6631 UniProtKB=P49257,HUMAN HGNC=16998 UniProtKB=P49755,HUMAN HGNC=649 UniProtKB=P48444,HUMAN HGNC=2232 UniProtKB=P35606,HUMAN HGNC=16996 UniProtKB=Q15363,HUMAN HGNC=24878 UniProtKB=Q9BVK6                                                                                                                                                                                                                                                                                                                                                                                                                                                                                                                                                                                                                                                                                                                                                                                                                                                                                                                                                                                                                         | endoplasmic reticulum to Golgi vesicle-mediated transport |
| GO:000688 |                                                                                                                                                                                                                                                                                                                                                                                                                                                                                                                                                                                                                                                                                                                                                                                                                                                                                                                                                                                                                                                                                                                                                                                                                                                                                                                                                                                                                                           |                                                           |
| 8         | HUMAN HGNC=12407 UniProtKB=P68366,HUMAN HGNC=654 UniProtKB=P61204,HUMAN HGNC=9391 UniProtKB=P13861,HUMAN HGNC=18756 UniProtKB=Q9BYZ6,HUMAN HGNC=9414 UniProtKB=Q13976,HUMAN HGNC=9862 UniProtKB=P61225,HUMAN HGNC=652 UniProtKB=P84077,HUMAN HGNC=12410 UniProtKB=Q9NY65,HUMAN HGNC=9380 UniProtKB=P17612,HUMAN HGNC=20778 UniProtKB=P07437,HUMAN HGNC=6407 UniProtKB=P01116,HUMAN HGNC=9392 UniProtKB=P31323,HUMAN HGNC=20766 UniProtKB=Q71U36,HUMAN HGNC=667 UniProtKB=P61586,HUMAN HGNC=4227 UniProtKB=P50395,HUMAN HGNC=9855 UniProtKB=P62834,HUMAN HGNC=544 UniProtKB=P08133,HUMAN HGNC=659 UniProtKB=P62330,HUMAN HGNC=9840 UniProtKB=P11234,HUMAN HGNC=9381 UniProtKB=P22694,HUMAN HGNC=678 UniProtKB=P52565,HUMAN HGNC=692 UniProtKB=P40616,HUMAN HGNC=4226 UniProtKB=P31150,HUMAN HGNC=626 UniProtKB=P07741,HUMAN HGNC=9801 UniProtKB=P63000,HUMAN HGNC=669 UniProtKB=P08134,HUMAN HGNC=9857 UniProtKB=P61224,HUMAN HGNC=679 UniProtKB=P52566,HUMAN HGNC=20774 UniProtKB=P04350,HUMAN HGNC=10447 UniProtKB=P10301,HUMAN HGNC=11231 UniProtKB=Q8WXF7,HUMAN HGNC=658 UniProtKB=P84085,HUMAN HGNC=20771 UniProtKB=P68371,HUMAN HGNC=655 UniProtKB=P18085,HUMAN HGNC=24526 UniProtKB=Q6DD88,HUMAN HGNC=10011 UniProtKB=Q15382,HUMAN HGNC=9802 UniProtKB=P15153,HUMAN HGNC=1736 UniProtKB=P60953,HUMAN HGNC=16257 UniProtKB=Q9H4B7,HUMAN HGNC=2153 UniProtKB=Q9NQW8,HUMAN HGNC=9386 UniProtKB=Q9UGJ0,HUMAN HGNC=4234 UniProtKB=P55040 | purine nucleotide binding                                 |
| GO:001707 |                                                                                                                                                                                                                                                                                                                                                                                                                                                                                                                                                                                                                                                                                                                                                                                                                                                                                                                                                                                                                                                                                                                                                                                                                                                                                                                                                                                                                                           |                                                           |
| 6         |                                                                                                                                                                                                                                                                                                                                                                                                                                                                                                                                                                                                                                                                                                                                                                                                                                                                                                                                                                                                                                                                                                                                                                                                                                                                                                                                                                                                                                           |                                                           |
| GO:000382 |                                                                                                                                                                                                                                                                                                                                                                                                                                                                                                                                                                                                                                                                                                                                                                                                                                                                                                                                                                                                                                                                                                                                                                                                                                                                                                                                                                                                                                           |                                                           |
| 4         | HUMAN HGNC=4312 UniProtKB=P48507                                                                                                                                                                                                                                                                                                                                                                                                                                                                                                                                                                                                                                                                                                                                                                                                                                                                                                                                                                                                                                                                                                                                                                                                                                                                                                                                                                                                          | catalytic activity                                        |

|                           |                                                                                                                                                                                                                                                                                                                    |                                                                  |
|---------------------------|--------------------------------------------------------------------------------------------------------------------------------------------------------------------------------------------------------------------------------------------------------------------------------------------------------------------|------------------------------------------------------------------|
| GO:014035<br>2            | HUMAN HGNC=800 UniProtKB=P50993,HUMAN HGNC=806 UniProtKB=P54709                                                                                                                                                                                                                                                    | export from cell                                                 |
| GO:190255<br>4            | HUMAN HGNC=8927 UniProtKB=Q93100<br>HUMAN HGNC=13109 UniProtKB=P17038,HUMAN HGNC=13061 UniProtKB=Q14587,HUMAN HGNC=18411 UniProtKB=Q3KNW1,HUMAN HGNC=23708 UniProtKB=Q6ZR52,HUMAN HGNC=9349 UniProtKB=Q9NQX1,HUMAN HGNC=12879 UniProtKB=P21506,HUMAN HGNC=29416 UniProtKB=Q5T7W0,HUMAN HGNC=13506 UniProtKB=Q8TBJ5 | serine/threonine protein kinase complex                          |
| PC00248                   | HUMAN HGNC=2973 UniProtKB=O00429,HUMAN HGNC=2974 UniProtKB=P50570,HUMAN HGNC=15912 UniProtKB=Q9UNZ2,HUMAN HGNC=29125 UniProtKB=Q9UQ16                                                                                                                                                                              | C2H2 zinc finger transcription factor                            |
| GO:006102<br>5            | HUMAN HGNC=10989 UniProtKB=Q00325,HUMAN HGNC=19375 UniProtKB=Q9BV35                                                                                                                                                                                                                                                | membrane fusion<br>mitochondrial carrier protein                 |
| PC00158<br>GO:003235<br>5 | HUMAN HGNC=533 UniProtKB=P04083                                                                                                                                                                                                                                                                                    | response to estradiol                                            |
| GO:000670<br>6            | HUMAN HGNC=613 UniProtKB=P02649                                                                                                                                                                                                                                                                                    | steroid catabolic process                                        |
| GO:006054<br>8            | HUMAN HGNC=28771 UniProtKB=Q9BVC6                                                                                                                                                                                                                                                                                  | negative regulation of cell death                                |
| GO:004426<br>0            | HUMAN HGNC=25153 UniProtKB=Q96EY5<br>HUMAN HGNC=23151 UniProtKB=Q86UX7,HUMAN HGNC=3778 UniProtKB=P02751,HUMAN HGNC=6156 UniProtKB=P05106,HUMAN HGNC=6153 UniProtKB=P05556,HUMAN HGNC=11845 UniProtKB=Q9Y490,HUMAN HGNC=15447 UniProtKB=Q9Y4G6                                                                      | cellular macromolecule metabolic process                         |
| GO:000517<br>8            | HUMAN HGNC=12407 UniProtKB=P68366,HUMAN HGNC=12410 UniProtKB=Q9NY65,HUMAN HGNC=20778 UniProtKB=P07437,HUMAN HGNC=16257 UniProtKB=Q9H4B7,HUMAN HGNC=20766 UniProtKB=Q71U36,HUMAN HGNC=20774 UniProtKB=P04350,HUMAN HGNC=20771 UniProtKB=P68371                                                                      | integrin binding                                                 |
| PC00228                   | HUMAN HGNC=24728 UniProtKB=A2RTX5,HUMAN HGNC=2678 UniProtKB=P14868,HUMAN HGNC=4162 UniProtKB=P41250,HUMAN HGNC=11572 UniProtKB=P26639,HUMAN HGNC=16219 UniProtKB=Q8TEA8,HUMAN HGNC=12729 UniProtKB=P23381                                                                                                          | tubulin                                                          |
| GO:000639<br>9            | HUMAN HGNC=1869 UniProtKB=P11597,HUMAN HGNC=9093 UniProtKB=P55058                                                                                                                                                                                                                                                  | tRNA metabolic process                                           |
| GO:005078<br>9            |                                                                                                                                                                                                                                                                                                                    | regulation of biological process                                 |
| GO:000816<br>8            | HUMAN HGNC=24550 UniProtKB=Q9H8H3                                                                                                                                                                                                                                                                                  |                                                                  |
| GO:000524<br>4            | HUMAN HGNC=12669 UniProtKB=P21796,HUMAN HGNC=12674 UniProtKB=Q9Y277,HUMAN HGNC=12672 UniProtKB=P45880                                                                                                                                                                                                              | methyltransferase activity<br>voltage-gated ion channel activity |
| GO:000565<br>6            | HUMAN HGNC=26200 UniProtKB=Q9H668                                                                                                                                                                                                                                                                                  | nuclear pre-replicative complex                                  |
| GO:002284<br>3            | HUMAN HGNC=16768 UniProtKB=O60391<br>HUMAN HGNC=8533 UniProtKB=P51575,HUMAN HGNC=2153 UniProtKB=Q9NQW8,HUMAN HGNC=830 UniProtKB=P06576,HUMAN HGNC=850 UniProtKB=P48047                                                                                                                                             | voltage-gated cation channel activity                            |
| GO:000526<br>1            | HUMAN HGNC=253 UniProtKB=P11766,HUMAN HGNC=7863 UniProtKB=Q13423,HUMAN HGNC=11834 UniProtKB=P29401,HUMAN HGNC=251 UniProtKB=P00326,HUMAN HGNC=8891 UniProtKB=P52209,HUMAN HGNC=8903 UniProtKB=O95336,HUMAN HGNC=255 UniProtKB=P28332                                                                               | cation channel activity                                          |
| GO:000609<br>1            |                                                                                                                                                                                                                                                                                                                    | generation of precursor metabolites and energy                   |

|            |                                                                                                                                                                                                                                                                                                                                                                                                                                                                                                                                       |                                                                 |
|------------|---------------------------------------------------------------------------------------------------------------------------------------------------------------------------------------------------------------------------------------------------------------------------------------------------------------------------------------------------------------------------------------------------------------------------------------------------------------------------------------------------------------------------------------|-----------------------------------------------------------------|
| GO:0015276 | HUMAN HGNC=8533 UniProtKB=P51575,HUMAN HGNC=544 UniProtKB=P08133,HUMAN HGNC=2153 UniProtKB=Q9NQW8,HUMAN HGNC=16768 UniProtKB=O60391                                                                                                                                                                                                                                                                                                                                                                                                   | ligand-gated ion channel activity                               |
| GO:0032210 | HUMAN HGNC=5048 UniProtKB=Q00839                                                                                                                                                                                                                                                                                                                                                                                                                                                                                                      | regulation of telomere maintenance via telomerase               |
| GO:0016607 | HUMAN HGNC=5048 UniProtKB=Q00839                                                                                                                                                                                                                                                                                                                                                                                                                                                                                                      | nuclear speck                                                   |
| GO:0004722 | HUMAN HGNC=19388 UniProtKB=P49593,HUMAN HGNC=9302 UniProtKB=P30153,HUMAN HGNC=9314 UniProtKB=Q08209,HUMAN HGNC=9281 UniProtKB=P62136                                                                                                                                                                                                                                                                                                                                                                                                  | protein serine/threonine phosphatase activity                   |
| GO:0042035 | HUMAN HGNC=6517 UniProtKB=P18428                                                                                                                                                                                                                                                                                                                                                                                                                                                                                                      | regulation of cytokine biosynthetic process                     |
| GO:0016667 | HUMAN HGNC=2898 UniProtKB=P09622,HUMAN HGNC=28477 UniProtKB=Q8NBM8,HUMAN HGNC=9756 UniProtKB=O00391,HUMAN HGNC=7377 UniProtKB=Q9UJ68                                                                                                                                                                                                                                                                                                                                                                                                  | oxidoreductase activity, acting on a sulfur group of donors     |
| GO:1901566 | HUMAN HGNC=30244 UniProtKB=Q6P1A2,HUMAN HGNC=2689 UniProtKB=P09172                                                                                                                                                                                                                                                                                                                                                                                                                                                                    | organonitrogen compound biosynthetic process                    |
| GO:0008630 | HUMAN HGNC=992 UniProtKB=Q07817                                                                                                                                                                                                                                                                                                                                                                                                                                                                                                       | intrinsic apoptotic signaling pathway in response to DNA damage |
| GO:0031122 | HUMAN HGNC=1090 UniProtKB=Q03001                                                                                                                                                                                                                                                                                                                                                                                                                                                                                                      | cytoplasmic microtubule organization                            |
| GO:0030686 | HUMAN HGNC=12755 UniProtKB=Q9UNX4                                                                                                                                                                                                                                                                                                                                                                                                                                                                                                     | 90S preribosome                                                 |
| GO:0006006 | HUMAN HGNC=8898 UniProtKB=P07205,HUMAN HGNC=8876 UniProtKB=P17858,HUMAN HGNC=4458 UniProtKB=P06744,HUMAN HGNC=12009 UniProtKB=P60174,HUMAN HGNC=8878 UniProtKB=Q01813,HUMAN HGNC=18985 UniProtKB=Q7Z4W1                                                                                                                                                                                                                                                                                                                               | glucose metabolic process                                       |
| GO:1901137 | HUMAN HGNC=12009 UniProtKB=P60174                                                                                                                                                                                                                                                                                                                                                                                                                                                                                                     | carbohydrate derivative biosynthetic process                    |
| GO:0017112 | HUMAN HGNC=24748 UniProtKB=Q68D51,HUMAN HGNC=6766 UniProtKB=Q8WYG6,HUMAN HGNC=10542 UniProtKB=O95248                                                                                                                                                                                                                                                                                                                                                                                                                                  | Rab guanyl-nucleotide exchange factor activity                  |
| GO:0061462 | HUMAN HGNC=1406 UniProtKB=Q9Y698                                                                                                                                                                                                                                                                                                                                                                                                                                                                                                      | protein localization to lysosome                                |
| GO:0090407 | HUMAN HGNC=29035 UniProtKB=O43314,HUMAN HGNC=12009 UniProtKB=P60174                                                                                                                                                                                                                                                                                                                                                                                                                                                                   | organophosphate biosynthetic process                            |
| GO:0009060 | HUMAN HGNC=12582 UniProtKB=P14927,HUMAN HGNC=12590 UniProtKB=P07919                                                                                                                                                                                                                                                                                                                                                                                                                                                                   | aerobic respiration                                             |
| GO:0035235 | HUMAN HGNC=1406 UniProtKB=Q9Y698,HUMAN HGNC=15474 UniProtKB=Q9Y566,HUMAN HGNC=16768 UniProtKB=O60391,HUMAN HGNC=14294 UniProtKB=Q9BYB0                                                                                                                                                                                                                                                                                                                                                                                                | ionotropic glutamate receptor signaling pathway                 |
| GO:0005777 | HUMAN HGNC=11179 UniProtKB=P00441,HUMAN HGNC=5382 UniProtKB=O75874,HUMAN HGNC=121 UniProtKB=O15254,HUMAN HGNC=119 UniProtKB=Q15067                                                                                                                                                                                                                                                                                                                                                                                                    | peroxisome                                                      |
| GO:0072376 | HUMAN HGNC=5575 UniProtKB=A0A0B4J1V2,HUMAN HGNC=5645 UniProtKB=A0A0C4DH34,HUMAN HGNC=5549 UniProtKB=A0A0C4DH31,HUMAN HGNC=5554 UniProtKB=P01743,HUMAN HGNC=5480 UniProtKB=P01880,HUMAN HGNC=5659 UniProtKB=A0A0C4DH38,HUMAN HGNC=5634 UniProtKB=A0A075B7F0,HUMAN HGNC=38476 UniProtKB=B9A064,HUMAN HGNC=1324 UniProtKB=POCOL5,HUMAN HGNC=5861 UniProtKB=A0M8Q6,HUMAN HGNC=5647 UniProtKB=A0A087WSY4,HUMAN HGNC=5563 UniProtKB=A0A075B7D0,HUMAN HGNC=5856 UniProtKB=P0DOY2,HUMAN HGNC=2367 UniProtKB=P02741,HUMAN HGNC=5606 UniProtKB= | protein activation cascade                                      |

|            |                                                                                                                                                                                                                                                                                                                                                                                                                                                                                                                                                                                                                                                                                                                                                                                                                                                                                                                                                                                                                                                                                                                                                                                                                                                                                                                                                                                                                                                                                                                                                                                                                                                                            |                                                                                        |
|------------|----------------------------------------------------------------------------------------------------------------------------------------------------------------------------------------------------------------------------------------------------------------------------------------------------------------------------------------------------------------------------------------------------------------------------------------------------------------------------------------------------------------------------------------------------------------------------------------------------------------------------------------------------------------------------------------------------------------------------------------------------------------------------------------------------------------------------------------------------------------------------------------------------------------------------------------------------------------------------------------------------------------------------------------------------------------------------------------------------------------------------------------------------------------------------------------------------------------------------------------------------------------------------------------------------------------------------------------------------------------------------------------------------------------------------------------------------------------------------------------------------------------------------------------------------------------------------------------------------------------------------------------------------------------------------|----------------------------------------------------------------------------------------|
|            | B=P01763,HUMAN HGNC=5576 UniProtKB=P01817,HUMAN HGNC=5528 UniProtKB=P01861,HUMAN HGNC=5541 UniProtKB=P01871,HUMAN HGNC=5585 UniProtKB=A0A0C4DH32,HUMAN HGNC=5551 UniProtKB=A0A0C4DH33,HUMAN HGNC=5526 UniProtKB=P01859,HUMAN HGNC=5657 UniProtKB=P0DP08,HUMAN Ensembl=ENSG00000282639 UniProtKB=A0A0J9YX35,HUMAN Gene=HV309_HUMAN UniProtKB=P01782,HUMAN HGNC=5654 UniProtKB=P01825,HUMAN HGNC=5553 UniProtKB=A0A0A0MS14,HUMAN Gene=HV108_HUMAN UniProtKB=P0DP01,HUMAN HGNC=5624 UniProtKB=A0A0B4J1X5,HUMAN HGNC=5620 UniProtKB=P01780,HUMAN HGNC=5598 UniProtKB=A0A0C4DH35,HUMAN HGNC=5580 UniProtKB=P01762,HUMAN HGNC=5633 UniProtKB=A0A075B7D8,HUMAN HGNC=5582 UniProtKB=A0A0B4J1V0,HUMAN HGNC=5478 UniProtKB=P01876,HUMAN HGNC=5617 UniProtKB=A0A075B6Q5,HUMAN HGNC=5594 UniProtKB=P0DP03,HUMAN HGNC=5655 UniProtKB=A0A0C4DH41,HUMAN HGNC=5636 UniProtKB=A0A075B7B8,HUMAN HGNC=5586 UniProtKB=A0A0B4J1V1,HUMAN HGNC=5581 UniProtKB=P01766,HUMAN HGNC=5622 UniProtKB=A0A0B4J1Y9,HUMAN HGNC=5652 UniProtKB=A0A075B6R2,HUMAN HGNC=5593 UniProtKB=P0DP02,HUMAN HGNC=5479 UniProtKB=P01877,HUMAN HGNC=5619 UniProtKB=A0A0C4DH42,HUMAN HGNC=5596 UniProtKB=P01772,HUMAN HGNC=3662 UniProtKB=P02675,HUMAN HGNC=5550 UniProtKB=P23083,HUMAN HGNC=5604 UniProtKB=A0A0B4J1X8,HUMAN HGNC=5525 UniProtKB=P01857,HUMAN HGNC=5662 UniProtKB=A0A0B4J1U7,HUMAN HGNC=5601 UniProtKB=A0A0C4DH36,HUMAN HGNC=5716 UniProtKB=P01834,HUMAN HGNC=5588 UniProtKB=P01764,HUMAN HGNC=5857 UniProtKB=P0DOY3,HUMAN HGNC=3531 UniProtKB=P00488,HUMAN HGNC=5610 UniProtKB=P01767,HUMAN Ensembl=ENSG00000282150 UniProtKB=A0A0J9YY99,HUMAN HGNC=5527 UniProtKB=P01860,HUMAN HGNC=584 UniProtKB=P02743 |                                                                                        |
| GO:0090092 | HUMAN HGNC=11766 UniProtKB=P01137                                                                                                                                                                                                                                                                                                                                                                                                                                                                                                                                                                                                                                                                                                                                                                                                                                                                                                                                                                                                                                                                                                                                                                                                                                                                                                                                                                                                                                                                                                                                                                                                                                          | regulation of transmembrane receptor protein serine/threonine kinase signaling pathway |
| GO:0032970 | HUMAN HGNC=21230 UniProtKB=Q9P1F3                                                                                                                                                                                                                                                                                                                                                                                                                                                                                                                                                                                                                                                                                                                                                                                                                                                                                                                                                                                                                                                                                                                                                                                                                                                                                                                                                                                                                                                                                                                                                                                                                                          | regulation of actin filament-based process                                             |
| GO:0050801 | HUMAN HGNC=1869 UniProtKB=P11597,HUMAN HGNC=10582 UniProtKB=Q9Y5Y9                                                                                                                                                                                                                                                                                                                                                                                                                                                                                                                                                                                                                                                                                                                                                                                                                                                                                                                                                                                                                                                                                                                                                                                                                                                                                                                                                                                                                                                                                                                                                                                                         | ion homeostasis                                                                        |
| GO:0000122 | HUMAN HGNC=9866 UniProtKB=P13631,HUMAN HGNC=6767 UniProtKB=Q15797,HUMAN HGNC=29989 UniProtKB=Q86YP4,HUMAN HGNC=7967 UniProtKB=Q96RI1,HUMAN HGNC=5048 UniProtKB=Q00839,HUMAN HGNC=12879 UniProtKB=P21506,HUMAN HGNC=16804 UniProtKB=O00308                                                                                                                                                                                                                                                                                                                                                                                                                                                                                                                                                                                                                                                                                                                                                                                                                                                                                                                                                                                                                                                                                                                                                                                                                                                                                                                                                                                                                                  | negative regulation of transcription by RNA polymerase II                              |
| GO:0033218 | HUMAN HGNC=9093 UniProtKB=P55058                                                                                                                                                                                                                                                                                                                                                                                                                                                                                                                                                                                                                                                                                                                                                                                                                                                                                                                                                                                                                                                                                                                                                                                                                                                                                                                                                                                                                                                                                                                                                                                                                                           | amide binding                                                                          |
| GO:0007091 | HUMAN HGNC=15713 UniProtKB=Q9UJX4,HUMAN HGNC=12401 UniProtKB=P33981,HUMAN HGNC=14452 UniProtKB=Q9NYG5                                                                                                                                                                                                                                                                                                                                                                                                                                                                                                                                                                                                                                                                                                                                                                                                                                                                                                                                                                                                                                                                                                                                                                                                                                                                                                                                                                                                                                                                                                                                                                      | metaphase/anaphase transition of mitotic cell cycle                                    |
| GO:0048856 | HUMAN HGNC=11219 UniProtKB=P09486                                                                                                                                                                                                                                                                                                                                                                                                                                                                                                                                                                                                                                                                                                                                                                                                                                                                                                                                                                                                                                                                                                                                                                                                                                                                                                                                                                                                                                                                                                                                                                                                                                          | anatomical structure development                                                       |
| GO:0022853 | HUMAN HGNC=800 UniProtKB=P50993,HUMAN HGNC=813 UniProtKB=Q93084,HUMAN HGNC=851 UniProtKB=P38606,HUMAN H                                                                                                                                                                                                                                                                                                                                                                                                                                                                                                                                                                                                                                                                                                                                                                                                                                                                                                                                                                                                                                                                                                                                                                                                                                                                                                                                                                                                                                                                                                                                                                    | active ion transmembrane transporter activity                                          |

|            |                                                                                                                                                                                                                                                                              |                                            |
|------------|------------------------------------------------------------------------------------------------------------------------------------------------------------------------------------------------------------------------------------------------------------------------------|--------------------------------------------|
|            | GNC=806 UniProtKB=P54709,HUMAN HGNC=812 UniProtKB=P16615                                                                                                                                                                                                                     |                                            |
| GO:0019882 | HUMAN HGNC=4932 UniProtKB=P01889<br>HUMAN HGNC=6528 UniProtKB=P13796,HUMAN HGNC=27937 UniProtKB=Q6ZVH7,HUMAN HGNC=11148 UniProtKB=Q16658,HUMAN HGNC=3382 UniProtKB=Q08495,HUMAN HGNC=8881 UniProtKB=P07737,HUMAN HGNC=243 UniProtKB=P35611,HUMAN HGNC=24636 UniProtKB=Q9UHB6 | antigen processing and presentation        |
| GO:0051017 | HUMAN HGNC=1117 UniProtKB=Q9UPA5,HUMAN HGNC=2905 UniProtKB=O14490,HUMAN HGNC=13406 UniProtKB=Q9Y6V0                                                                                                                                                                          | actin filament bundle assembly             |
| GO:0098978 |                                                                                                                                                                                                                                                                              | glutamatergic synapse                      |
| GO:1901136 | HUMAN HGNC=4456 UniProtKB=P43304                                                                                                                                                                                                                                             | carbohydrate derivative catabolic process  |
| GO:0044419 | HUMAN HGNC=16276 UniProtKB=Q9C035,HUMAN HGNC=25153 UniProtKB=Q96EY5                                                                                                                                                                                                          | interspecies interaction between organisms |
| GO:0030016 | HUMAN HGNC=9621 UniProtKB=Q6IBS0,HUMAN HGNC=347 UniProtKB=Q09666<br>HUMAN HGNC=29585 UniProtKB=Q8N6V9,HUMAN HGNC=12010 UniProtKB=P09493,HUMAN HGNC=12012 UniProtKB=P06753,HUMAN HGNC=12013 UniProtKB=P67936,HUMAN HGNC=12011 UniProtKB=P07951                                | myofibril                                  |
| PC00040    |                                                                                                                                                                                                                                                                              | actin binding motor protein                |
| GO:0017046 | HUMAN HGNC=10608 UniProtKB=P47872,HUMAN HGNC=6091 UniProtKB=P06213                                                                                                                                                                                                           | peptide hormone binding                    |
| GO:0043025 | HUMAN HGNC=5253 UniProtKB=P07900,HUMAN HGNC=6835 UniProtKB=P78559,HUMAN HGNC=11138 UniProtKB=P37840                                                                                                                                                                          | neuronal cell body                         |
| GO:0006970 | HUMAN HGNC=21696 UniProtKB=Q9Y3Q8                                                                                                                                                                                                                                            | response to osmotic stress                 |
| GO:0043149 | HUMAN HGNC=667 UniProtKB=P61586                                                                                                                                                                                                                                              | stress fiber assembly                      |
| GO:0048489 | HUMAN HGNC=6325 UniProtKB=O60282,HUMAN HGNC=2974 UniProtKB=P50570,HUMAN HGNC=29125 UniProtKB=Q9UQ16                                                                                                                                                                          | synaptic vesicle transport                 |
| GO:0005262 | HUMAN HGNC=23526 UniProtKB=Q8NE86,HUMAN HGNC=544 UniProtKB=P08133<br>HUMAN HGNC=3338 UniProtKB=Q14247,HUMAN HGNC=15474 UniProtKB=Q9Y566,HUMAN HGNC=2695 UniProtKB=Q16643,HUMAN HGNC=2696 UniProtKB=Q9UJU6,HUMAN HGNC=4844 UniProtKB=P14317,HUMAN HGNC=14294 UniProtKB=Q9BYB0 | calcium channel activity                   |
| GO:0060998 | HUMAN HGNC=4716 UniProtKB=P16403,HUMAN HGNC=4718 UniProtKB=P10412,HUMAN HGNC=4719 UniProtKB=P16401                                                                                                                                                                           | regulation of dendritic spine development  |
| GO:0045910 | HUMAN HGNC=9855 UniProtKB=P62834,HUMAN HGNC=7641 UniProtKB=P54920,HUMAN HGNC=9857 UniProtKB=P61224                                                                                                                                                                           | negative regulation of DNA recombination   |
| GO:0046928 | HUMAN HGNC=4045 UniProtKB=O75084,HUMAN HGNC=11119 UniProtKB=Q99835                                                                                                                                                                                                           | regulation of neurotransmitter secretion   |
| GO:0035567 |                                                                                                                                                                                                                                                                              | non-canonical Wnt signaling pathway        |
| GO:0035329 | HUMAN HGNC=20250 UniProtKB=Q96IF1<br>HUMAN HGNC=6137 UniProtKB=P17301,HUMAN HGNC=6156 UniProtKB=P05106,HUMAN HGNC=6138 UniProtKB=P08514,HUMAN HGNC=6153 UniProtKB=P05556,HUMAN HGNC=6149 UniProtKB=P11215,HUMAN HGNC=6142 UniProtKB=P23229                                   | hippo signaling                            |
| PC00126    | HUMAN HGNC=8876 UniProtKB=P17858,HUMAN HGNC=8601 UniProtKB=Q06141,HUMAN HGNC=4458 UniProtKB=P06744,HUMAN HGNC=6561 UniProtKB=P09382,HUMAN HGNC=8878 UniProtKB=Q01813,HUMAN HGNC=6631 UniProtKB=P49257                                                                        | integrin                                   |
| GO:0030246 |                                                                                                                                                                                                                                                                              | carbohydrate binding                       |

|           |                                                                                                                                                                                                                                                                                                                                                                                                                                                                                                                                                                                                                                                                                                                                                                                                                                                                                                                                                                                                                                                                                                                                                                                                                                                                                                                                                                                                             |                                                     |
|-----------|-------------------------------------------------------------------------------------------------------------------------------------------------------------------------------------------------------------------------------------------------------------------------------------------------------------------------------------------------------------------------------------------------------------------------------------------------------------------------------------------------------------------------------------------------------------------------------------------------------------------------------------------------------------------------------------------------------------------------------------------------------------------------------------------------------------------------------------------------------------------------------------------------------------------------------------------------------------------------------------------------------------------------------------------------------------------------------------------------------------------------------------------------------------------------------------------------------------------------------------------------------------------------------------------------------------------------------------------------------------------------------------------------------------|-----------------------------------------------------|
| GO:009752 |                                                                                                                                                                                                                                                                                                                                                                                                                                                                                                                                                                                                                                                                                                                                                                                                                                                                                                                                                                                                                                                                                                                                                                                                                                                                                                                                                                                                             |                                                     |
| 6         | HUMAN HGNC=17259 UniProtKB=Q9Y4Z0                                                                                                                                                                                                                                                                                                                                                                                                                                                                                                                                                                                                                                                                                                                                                                                                                                                                                                                                                                                                                                                                                                                                                                                                                                                                                                                                                                           | spliceosomal tri-snRNP complex                      |
| GO:000004 | HUMAN HGNC=26022 UniProtKB=Q7LOY3,HUMAN Gene=EIF2S3L                                                                                                                                                                                                                                                                                                                                                                                                                                                                                                                                                                                                                                                                                                                                                                                                                                                                                                                                                                                                                                                                                                                                                                                                                                                                                                                                                        |                                                     |
| 9         | UniProtKB=Q2VIR3                                                                                                                                                                                                                                                                                                                                                                                                                                                                                                                                                                                                                                                                                                                                                                                                                                                                                                                                                                                                                                                                                                                                                                                                                                                                                                                                                                                            | tRNA binding                                        |
| GO:004280 | HUMAN HGNC=29943 UniProtKB=Q9NT68,HUMAN HGNC=992 UniProtKB=Q07817,HUMAN HGNC=16276 UniProtKB=Q9C035                                                                                                                                                                                                                                                                                                                                                                                                                                                                                                                                                                                                                                                                                                                                                                                                                                                                                                                                                                                                                                                                                                                                                                                                                                                                                                         | protein homodimerization activity                   |
| 3         |                                                                                                                                                                                                                                                                                                                                                                                                                                                                                                                                                                                                                                                                                                                                                                                                                                                                                                                                                                                                                                                                                                                                                                                                                                                                                                                                                                                                             | production of molecular mediator of immune response |
| GO:000244 |                                                                                                                                                                                                                                                                                                                                                                                                                                                                                                                                                                                                                                                                                                                                                                                                                                                                                                                                                                                                                                                                                                                                                                                                                                                                                                                                                                                                             |                                                     |
| 0         | HUMAN HGNC=16961 UniProtKB=Q15762                                                                                                                                                                                                                                                                                                                                                                                                                                                                                                                                                                                                                                                                                                                                                                                                                                                                                                                                                                                                                                                                                                                                                                                                                                                                                                                                                                           | inorganic anion transmembrane transporter activity  |
| GO:001510 | HUMAN HGNC=12669 UniProtKB=P21796,HUMAN HGNC=12674 UniProtKB=Q9Y277,HUMAN HGNC=12672 UniProtKB=P45880                                                                                                                                                                                                                                                                                                                                                                                                                                                                                                                                                                                                                                                                                                                                                                                                                                                                                                                                                                                                                                                                                                                                                                                                                                                                                                       |                                                     |
| 3         | HUMAN HGNC=9240 UniProtKB=P02775,HUMAN HGNC=10632 UniProtKB=P13501,HUMAN HGNC=8862 UniProtKB=P10720,HUMAN HGNC=8861 UniProtKB=P02776,HUMAN HGNC=29953 UniProtKB=Q8WWZ8                                                                                                                                                                                                                                                                                                                                                                                                                                                                                                                                                                                                                                                                                                                                                                                                                                                                                                                                                                                                                                                                                                                                                                                                                                      | neutrophil migration                                |
| GO:199026 |                                                                                                                                                                                                                                                                                                                                                                                                                                                                                                                                                                                                                                                                                                                                                                                                                                                                                                                                                                                                                                                                                                                                                                                                                                                                                                                                                                                                             | active transmembrane transporter activity           |
| 6         |                                                                                                                                                                                                                                                                                                                                                                                                                                                                                                                                                                                                                                                                                                                                                                                                                                                                                                                                                                                                                                                                                                                                                                                                                                                                                                                                                                                                             |                                                     |
| GO:002280 | HUMAN HGNC=55 UniProtKB=O15439,HUMAN HGNC=14637 UniProtKB=Q86UK0                                                                                                                                                                                                                                                                                                                                                                                                                                                                                                                                                                                                                                                                                                                                                                                                                                                                                                                                                                                                                                                                                                                                                                                                                                                                                                                                            |                                                     |
| 4         |                                                                                                                                                                                                                                                                                                                                                                                                                                                                                                                                                                                                                                                                                                                                                                                                                                                                                                                                                                                                                                                                                                                                                                                                                                                                                                                                                                                                             |                                                     |
| GO:009956 | HUMAN HGNC=1117 UniProtKB=Q9UPA5,HUMAN HGNC=2090 UniProtKB=P09496,HUMAN HGNC=13406 UniProtKB=Q9Y6V0                                                                                                                                                                                                                                                                                                                                                                                                                                                                                                                                                                                                                                                                                                                                                                                                                                                                                                                                                                                                                                                                                                                                                                                                                                                                                                         | cytoplasmic region                                  |
| 8         | HUMAN HGNC=5171 UniProtKB=P02790,HUMAN HGNC=7176 UniProtKB=P14780,HUMAN HGNC=3602 UniProtKB=Q9UBX5,HUMAN HGNC=11771 UniProtKB=Q15582,HUMAN HGNC=15855 UniProtKB=Q9NPY3                                                                                                                                                                                                                                                                                                                                                                                                                                                                                                                                                                                                                                                                                                                                                                                                                                                                                                                                                                                                                                                                                                                                                                                                                                      | extracellular matrix organization                   |
| GO:003019 |                                                                                                                                                                                                                                                                                                                                                                                                                                                                                                                                                                                                                                                                                                                                                                                                                                                                                                                                                                                                                                                                                                                                                                                                                                                                                                                                                                                                             |                                                     |
| 8         | HUMAN HGNC=7694 UniProtKB=O14561,HUMAN HGNC=18344 UniProtKB=Q9BX68,HUMAN HGNC=118 UniProtKB=Q99798,HUMAN HGNC=16753 UniProtKB=P30041,HUMAN HGNC=17865 UniProtKB=Q96A26,HUMAN HGNC=5382 UniProtKB=O75874,HUMAN HGNC=20 UniProtKB=P49588,HUMAN HGNC=2328 UniProtKB=P50416,HUMAN HGNC=4553 UniProtKB=P07203,HUMAN HGNC=4433 UniProtKB=P00505,HUMAN HGNC=363 UniProtKB=P27144,HUMAN HGNC=3951 UniProtKB=Q16595,HUMAN HGNC=2873 UniProtKB=P00387,HUMAN HGNC=24808 UniProtKB=O14545,HUMAN HGNC=12585 UniProtKB=P31930,HUMAN HGNC=6984 UniProtKB=P23368,HUMAN HGNC=12388 UniProtKB=Q16762,HUMAN HGNC=3151 UniProtKB=P30084,HUMAN HGNC=13397 UniProtKB=Q9UHQ9,HUMAN HGNC=11572 UniProtKB=P26639,HUMAN HGNC=29890 UniProtKB=Q86UT6,HUMAN HGNC=13206 UniProtKB=O60296,HUMAN HGNC=9772 UniProtKB=Q13637,HUMAN HGNC=28883 UniProtKB=Q9H2U2,HUMAN HGNC=1243 UniProtKB=Q07021,HUMAN HGNC=8527 UniProtKB=P55809,HUMAN HGNC=94 UniProtKB=Q9BWD1,HUMAN HGNC=17376 UniProtKB=Q9UIJ7,HUMAN HGNC=4335 UniProtKB=P00367,HUMAN HGNC=7223 UniProtKB=P25325,HUMAN HGNC=24728 UniProtKB=A2RTX5,HUMAN HGNC=11179 UniProtKB=P00441,HUMAN HGNC=4922 UniProtKB=P19367,HUMAN HGNC=1050 UniProtKB=P55957,HUMAN HGNC=5381 UniProtKB=P14735,HUMAN HGNC=117 UniProtKB=P21399,HUMAN HGNC=871 UniProtKB=Q9UII2,HUMAN HGNC=362 UniProtKB=P54819,HUMAN HGNC=4456 UniProtKB=P43304,HUMAN HGNC=92 UniProtKB=P49748,HUMAN HGNC=5386 UniProtKB=P51553 | mitochondrion                                       |
| GO:000573 |                                                                                                                                                                                                                                                                                                                                                                                                                                                                                                                                                                                                                                                                                                                                                                                                                                                                                                                                                                                                                                                                                                                                                                                                                                                                                                                                                                                                             |                                                     |
| 9         | HUMAN HGNC=4116 UniProtKB=Q14376,HUMAN HGNC=9959 UniProtKB=P51606                                                                                                                                                                                                                                                                                                                                                                                                                                                                                                                                                                                                                                                                                                                                                                                                                                                                                                                                                                                                                                                                                                                                                                                                                                                                                                                                           | epimerase/racemase                                  |
| PC00096   |                                                                                                                                                                                                                                                                                                                                                                                                                                                                                                                                                                                                                                                                                                                                                                                                                                                                                                                                                                                                                                                                                                                                                                                                                                                                                                                                                                                                             |                                                     |

|            |                                                                                                                                                                                                                                                                                                                                             |                                                                           |
|------------|---------------------------------------------------------------------------------------------------------------------------------------------------------------------------------------------------------------------------------------------------------------------------------------------------------------------------------------------|---------------------------------------------------------------------------|
| GO:0005604 | HUMAN HGNC=2209 UniProtKB=P20908,HUMAN HGNC=12601 UniProtKB=O75445                                                                                                                                                                                                                                                                          | basement membrane                                                         |
| GO:0070555 | HUMAN HGNC=533 UniProtKB=P04083,HUMAN HGNC=10632 UniProtKB=P13501                                                                                                                                                                                                                                                                           | response to interleukin-1                                                 |
| GO:0044283 | HUMAN HGNC=8898 UniProtKB=P07205,HUMAN HGNC=4458 UniProtKB=P06744,HUMAN HGNC=12009 UniProtKB=P60174                                                                                                                                                                                                                                         | small molecule biosynthetic process                                       |
| GO:0005977 | HUMAN HGNC=9723 UniProtKB=P11216,HUMAN HGNC=9725 UniProtKB=P06737                                                                                                                                                                                                                                                                           | glycogen metabolic process                                                |
| GO:0061134 | HUMAN HGNC=20635 UniProtKB=Q14997                                                                                                                                                                                                                                                                                                           | peptidase regulator activity                                              |
| GO:0070979 | HUMAN HGNC=12488 UniProtKB=P68036,HUMAN HGNC=15713 UniProtKB=Q9UJX4                                                                                                                                                                                                                                                                         | protein K11-linked ubiquitination                                         |
| GO:0055088 | HUMAN HGNC=121 UniProtKB=O15254,HUMAN HGNC=119 UniProtKB=Q15067                                                                                                                                                                                                                                                                             | lipid homeostasis                                                         |
| GO:0046475 | HUMAN HGNC=13921 UniProtKB=O95870                                                                                                                                                                                                                                                                                                           | glycerophospholipid catabolic process                                     |
|            | HUMAN HGNC=28450 UniProtKB=Q8NC44,HUMAN HGNC=4045 UniProtKB=O75084,HUMAN HGNC=11442 UniProtKB=O15400,HUMAN HGNC=11429 UniProtKB=O75558,HUMAN HGNC=19176 UniProtKB=Q96DZ9,HUMAN HGNC=1628 UniProtKB=P08571,HUMAN HGNC=11119 UniProtKB=Q99835,HUMAN HGNC=9087 UniProtKB=Q04941                                                                | integral component of membrane                                            |
| GO:0016021 |                                                                                                                                                                                                                                                                                                                                             | endoplasmic reticulum lumen                                               |
| GO:0005788 | HUMAN Gene=SEP15 UniProtKB=O60613,HUMAN HGNC=5238 UniProtKB=P11021                                                                                                                                                                                                                                                                          |                                                                           |
| GO:0070997 | HUMAN HGNC=11138 UniProtKB=P37840                                                                                                                                                                                                                                                                                                           | neuron death                                                              |
|            | HUMAN HGNC=14685 UniProtKB=Q9Y624,HUMAN HGNC=243 UniProtKB=P35611,HUMAN HGNC=11828 UniProtKB=Q9UDY2,HUMAN HGNC=11283 UniProtKB=P12931                                                                                                                                                                                                       | cell development                                                          |
| GO:0048468 |                                                                                                                                                                                                                                                                                                                                             |                                                                           |
| GO:0030239 | HUMAN HGNC=11873 UniProtKB=Q9NYL9,HUMAN HGNC=3750 UniProtKB=Q13045                                                                                                                                                                                                                                                                          | myofibril assembly                                                        |
| GO:0043269 | HUMAN HGNC=11510 UniProtKB=Q8N9I0,HUMAN HGNC=11512 UniProtKB=Q9H2B2                                                                                                                                                                                                                                                                         | regulation of ion transport                                               |
|            | HUMAN HGNC=4395 UniProtKB=P19086,HUMAN HGNC=4384 UniProtKB=P63096,HUMAN HGNC=10608 UniProtKB=P47872,HUMAN HGNC=4387 UniProtKB=P08754,HUMAN HGNC=4385 UniProtKB=P04899,HUMAN HGNC=4393 UniProtKB=P11488,HUMAN HGNC=4390 UniProtKB=P50148                                                                                                     | adenylate cyclase-modulating G protein-coupled receptor signaling pathway |
| GO:0007188 | HUMAN HGNC=9391 UniProtKB=P13861,HUMAN HGNC=4395 UniProtKB=P19086,HUMAN HGNC=20040 UniProtKB=Q01518,HUMAN HGNC=4384 UniProtKB=P63096,HUMAN HGNC=10608 UniProtKB=P47872,HUMAN HGNC=4387 UniProtKB=P08754,HUMAN HGNC=9392 UniProtKB=P31323,HUMAN HGNC=4385 UniProtKB=P04899,HUMAN HGNC=4393 UniProtKB=P11488,HUMAN HGNC=4390 UniProtKB=P50148 | cAMP-mediated signaling                                                   |
| GO:0019933 | HUMAN HGNC=24728 UniProtKB=A2RTX5,HUMAN HGNC=2678 UniProtKB=P14868,HUMAN HGNC=20 UniProtKB=P49588,HUMAN HGNC=4162 UniProtKB=P41250,HUMAN HGNC=11572 UniProtKB=P26639,HUMAN HGNC=12729 UniProtKB=P23381                                                                                                                                      | aminoacyl-tRNA synthetase                                                 |
| PC00047    |                                                                                                                                                                                                                                                                                                                                             |                                                                           |
| GO:0015370 | HUMAN HGNC=11030 UniProtKB=Q9Y6R1,HUMAN HGNC=11034 UniProtKB=Q2Y0W8                                                                                                                                                                                                                                                                         | solute:sodium symporter activity                                          |
| GO:0007586 | HUMAN HGNC=14685 UniProtKB=Q9Y624,HUMAN HGNC=11756 UniProtKB=Q03403                                                                                                                                                                                                                                                                         | digestion                                                                 |

|            |                                                                                                                                                                                                                                                                                                                                                                                                                                                                                                                                                                                                                                                      |                                                                       |
|------------|------------------------------------------------------------------------------------------------------------------------------------------------------------------------------------------------------------------------------------------------------------------------------------------------------------------------------------------------------------------------------------------------------------------------------------------------------------------------------------------------------------------------------------------------------------------------------------------------------------------------------------------------------|-----------------------------------------------------------------------|
| GO:0032418 | HUMAN HGNC=11491 UniProtKB=P43405<br>HUMAN HGNC=17780 UniProtKB=Q562R1,HUMAN HGNC=29158 UniProtKB=Q9Y2G9,HUMAN HGNC=4716 UniProtKB=P16403,HUMAN HGNC=4718 UniProtKB=P10412,HUMAN HGNC=12738 UniProtKB=Q969T9,HUMAN HGNC=4719 UniProtKB=P16401                                                                                                                                                                                                                                                                                                                                                                                                        | lysosome localization<br>chromatin DNA binding                        |
| GO:0032438 | HUMAN HGNC=9772 UniProtKB=Q13637                                                                                                                                                                                                                                                                                                                                                                                                                                                                                                                                                                                                                     | melanosome organization                                               |
| GO:0016810 | HUMAN HGNC=794 UniProtKB=P31939,HUMAN HGNC=226 UniProtKB=P78563,HUMAN HGNC=469 UniProtKB=Q01433                                                                                                                                                                                                                                                                                                                                                                                                                                                                                                                                                      | hydrolase activity, acting on carbon-nitrogen (but not peptide) bonds |
| GO:0016052 | HUMAN HGNC=4116 UniProtKB=Q14376                                                                                                                                                                                                                                                                                                                                                                                                                                                                                                                                                                                                                     | carbohydrate catabolic process                                        |
| GO:0007219 | HUMAN HGNC=188 UniProtKB=O14672,HUMAN HGNC=16272 UniProtKB=Q96JK9<br>HUMAN HGNC=15476 UniProtKB=P63167,HUMAN HGNC=15848 UniProtKB=Q14141,HUMAN HGNC=16053 UniProtKB=Q8N1V2,HUMAN HGNC=20908 UniProtKB=Q86YF9,HUMAN HGNC=2952 UniProtKB=Q96JB1,HUMAN HGNC=25631 UniProtKB=Q96MT7,HUMAN HGNC=1717 UniProtKB=Q16181,HUMAN HGNC=3244 UniProtKB=Q9NZN3,HUMAN HGNC=29262 UniProtKB=Q9P2H3,HUMAN HGNC=7729 UniProtKB=Q15019                                                                                                                                                                                                                                 | Notch signaling pathway                                               |
| GO:1905349 | HUMAN HGNC=800 UniProtKB=P50993,HUMAN HGNC=806 UniProtKB=P54709                                                                                                                                                                                                                                                                                                                                                                                                                                                                                                                                                                                      | ciliary transition zone assembly                                      |
| GO:0006875 | HUMAN HGNC=30178 UniProtKB=Q9Y570,HUMAN HGNC=20 UniProtKB=P49588,HUMAN HGNC=6737 UniProtKB=O75608,HUMAN HGNC=16219 UniProtKB=Q8TEA8,HUMAN HGNC=8903 UniProtKB=O95336                                                                                                                                                                                                                                                                                                                                                                                                                                                                                 | cellular metal ion homeostasis                                        |
| GO:0052689 | HUMAN HGNC=17169 UniProtKB=Q13162,HUMAN HGNC=253 UniProtKB=P11766,HUMAN HGNC=4555 UniProtKB=P22352,HUMAN HGNC=9355 UniProtKB=P30044,HUMAN HGNC=4553 UniProtKB=P07203,HUMAN HGNC=4823 UniProtKB=P69905,HUMAN HGNC=4829 UniProtKB=P02042,HUMAN HGNC=9352 UniProtKB=Q06830,HUMAN HGNC=25153 UniProtKB=Q96EY5,HUMAN HGNC=4827 UniProtKB=P68871,HUMAN HGNC=7900 UniProtKB=P55786,HUMAN HGNC=11820 UniProtKB=P01033,HUMAN HGNC=9353 UniProtKB=P32119,HUMAN HGNC=4831 UniProtKB=P69891,HUMAN HGNC=1516 UniProtKB=P04040,HUMAN HGNC=13420 UniProtKB=Q86TP1,HUMAN HGNC=251 UniProtKB=P00326,HUMAN HGNC=18173 UniProtKB=Q9NZ08,HUMAN HGNC=255 UniProtKB=P28332 | carboxylic ester hydrolase activity                                   |
| GO:0044248 | HUMAN HGNC=2720 UniProtKB=Q9ULH1,HUMAN HGNC=6111 UniProtKB=Q13576,HUMAN HGNC=25361 UniProtKB=Q8N264,HUMAN HGNC=17102 UniProtKB=Q92619,HUMAN HGNC=4390 UniProtKB=P50148,HUMAN HGNC=10701 UniProtKB=Q15436,HUMAN HGNC=18423 UniProtKB=O75140,HUMAN HGNC=25694 UniProtKB=Q8TC07,HUMAN HGNC=29351 UniProtKB=Q9COH5,HUMAN HGNC=9847 UniProtKB=P43487,HUMAN HGNC=12363 UniProtKB=P49815,HUMAN HGNC=17073 UniProtKB=Q9UNA1,HUMAN HGNC=25571 UniProtKB=Q9NVG8,HUMAN HGNC=21035 UniProtKB=Q8N392                                                                                                                                                              | cellular catabolic process                                            |
| GO:0005096 | HUMAN HGNC=5575 UniProtKB=A0A0B4J1V2,HUMAN HGNC=5645 UniProtKB=A0A0C4DH34,HUMAN HGNC=5549 UniProtKB=A0A0C4DH31,HUMAN HGNC=5554 UniProtKB=P01743,HUMAN HGNC=18173 UniProtKB=Q9NZ08,HUMAN HGNC=255 UniProtKB=P28332                                                                                                                                                                                                                                                                                                                                                                                                                                    | GTPase activator activity                                             |
| GO:0008037 | HUMAN HGNC=5575 UniProtKB=A0A0B4J1V2,HUMAN HGNC=5645 UniProtKB=A0A0C4DH34,HUMAN HGNC=5549 UniProtKB=A0A0C4DH31,HUMAN HGNC=5554 UniProtKB=P01743,HUMAN HGNC=18173 UniProtKB=Q9NZ08,HUMAN HGNC=255 UniProtKB=P28332                                                                                                                                                                                                                                                                                                                                                                                                                                    | cell recognition                                                      |

|            |                                                                                                                                                                                                                                                                                                                                                                                                                                                                                                                                                                                                                                                                                                                                                                                                                                                                                                                                                                                                                                                                                                                                                                                                                                                                                                                                                                                                                                                                                                                                                                                                                                                                                                                                                                                                                                                                                                                     |                                                         |
|------------|---------------------------------------------------------------------------------------------------------------------------------------------------------------------------------------------------------------------------------------------------------------------------------------------------------------------------------------------------------------------------------------------------------------------------------------------------------------------------------------------------------------------------------------------------------------------------------------------------------------------------------------------------------------------------------------------------------------------------------------------------------------------------------------------------------------------------------------------------------------------------------------------------------------------------------------------------------------------------------------------------------------------------------------------------------------------------------------------------------------------------------------------------------------------------------------------------------------------------------------------------------------------------------------------------------------------------------------------------------------------------------------------------------------------------------------------------------------------------------------------------------------------------------------------------------------------------------------------------------------------------------------------------------------------------------------------------------------------------------------------------------------------------------------------------------------------------------------------------------------------------------------------------------------------|---------------------------------------------------------|
|            | NC=5480 UniProtKB=P01880,HUMAN HGNC=5659 UniProtKB=A0A0C4DH38,HUMAN HGNC=5634 UniProtKB=A0A075B7F0,HUMAN HGNC=38476 UniProtKB=B9A064,HUMAN HGNC=5861 UniProtKB=A0M8Q6,HUMAN HGNC=5647 UniProtKB=A0A087WSY4,HUMAN HGNC=5563 UniProtKB=A0A075B7D0,HUMAN HGNC=5856 UniProtKB=P0DOY2,HUMAN HGNC=5606 UniProtKB=P01763,HUMAN HGNC=5576 UniProtKB=P01817,HUMAN HGNC=5528 UniProtKB=P01861,HUMAN HGNC=5541 UniProtKB=P01871,HUMAN HGNC=5585 UniProtKB=A0A0C4DH32,HUMAN HGNC=5551 UniProtKB=A0A0C4DH33,HUMAN HGNC=5526 UniProtKB=P01859,HUMAN HGNC=5657 UniProtKB=P0DP08,HUMAN Ensembl=ENSG00000282639 UniProtKB=A0A0J9YX35,HUMAN Gene=HV309_HUMAN UniProtKB=P01782,HUMAN HGNC=5654 UniProtKB=P01825,HUMAN HGNC=5553 UniProtKB=A0A0A0MS14,HUMAN Gene=HV108_HUMAN UniProtKB=P0DP01,HUMAN HGNC=5624 UniProtKB=A0A0B4J1X5,HUMAN HGNC=5620 UniProtKB=P01780,HUMAN HGNC=5598 UniProtKB=A0A0C4DH35,HUMAN HGNC=5580 UniProtKB=P01762,HUMAN HGNC=5633 UniProtKB=A0A075B7D8,HUMAN HGNC=5582 UniProtKB=A0A0B4J1V0,HUMAN HGNC=5478 UniProtKB=P01876,HUMAN HGNC=5617 UniProtKB=A0A075B6Q5,HUMAN HGNC=5594 UniProtKB=P0DP03,HUMAN HGNC=5655 UniProtKB=A0A0C4DH41,HUMAN HGNC=5636 UniProtKB=A0A075B7B8,HUMAN HGNC=5586 UniProtKB=A0A0B4J1V1,HUMAN HGNC=5581 UniProtKB=P01766,HUMAN HGNC=29557 UniProtKB=Q0ZGT2,HUMAN HGNC=5622 UniProtKB=A0A0B4J1Y9,HUMAN HGNC=5652 UniProtKB=A0A075B6R2,HUMAN HGNC=5593 UniProtKB=P0DP02,HUMAN HGNC=5479 UniProtKB=P01877,HUMAN HGNC=5619 UniProtKB=A0A0C4DH42,HUMAN HGNC=5596 UniProtKB=P01772,HUMAN HGNC=5550 UniProtKB=P23083,HUMAN HGNC=5604 UniProtKB=A0A0B4J1X8,HUMAN HGNC=5525 UniProtKB=P01857,HUMAN HGNC=5662 UniProtKB=A0A0B4J1U7,HUMAN HGNC=5601 UniProtKB=A0A0C4DH36,HUMAN HGNC=5716 UniProtKB=P01834,HUMAN HGNC=5588 UniProtKB=P01764,HUMAN HGNC=5857 UniProtKB=P0DOY3,HUMAN HGNC=5610 UniProtKB=P01767,HUMAN Ensembl=ENSG00000282150 UniProtKB=A0A0J9YY99,HUMAN HGNC=5527 UniProtKB=P01860 |                                                         |
| GO:0097373 | HUMAN HGNC=26200 UniProtKB=Q9H668                                                                                                                                                                                                                                                                                                                                                                                                                                                                                                                                                                                                                                                                                                                                                                                                                                                                                                                                                                                                                                                                                                                                                                                                                                                                                                                                                                                                                                                                                                                                                                                                                                                                                                                                                                                                                                                                                   | MCM core complex                                        |
| GO:0032040 | HUMAN HGNC=12755 UniProtKB=Q9UNX4                                                                                                                                                                                                                                                                                                                                                                                                                                                                                                                                                                                                                                                                                                                                                                                                                                                                                                                                                                                                                                                                                                                                                                                                                                                                                                                                                                                                                                                                                                                                                                                                                                                                                                                                                                                                                                                                                   | small-subunit processome                                |
| GO:0009893 | HUMAN HGNC=613 UniProtKB=P02649                                                                                                                                                                                                                                                                                                                                                                                                                                                                                                                                                                                                                                                                                                                                                                                                                                                                                                                                                                                                                                                                                                                                                                                                                                                                                                                                                                                                                                                                                                                                                                                                                                                                                                                                                                                                                                                                                     | positive regulation of metabolic process                |
| GO:0072655 | HUMAN HGNC=26801 UniProtKB=Q8N8Q8                                                                                                                                                                                                                                                                                                                                                                                                                                                                                                                                                                                                                                                                                                                                                                                                                                                                                                                                                                                                                                                                                                                                                                                                                                                                                                                                                                                                                                                                                                                                                                                                                                                                                                                                                                                                                                                                                   | establishment of protein localization to mitochondrion  |
| GO:0051240 | HUMAN HGNC=11491 UniProtKB=P43405,HUMAN HGNC=3537 UniProtKB=P25116,HUMAN HGNC=9065 UniProtKB=P19174                                                                                                                                                                                                                                                                                                                                                                                                                                                                                                                                                                                                                                                                                                                                                                                                                                                                                                                                                                                                                                                                                                                                                                                                                                                                                                                                                                                                                                                                                                                                                                                                                                                                                                                                                                                                                 | positive regulation of multicellular organismal process |
| GO:0005905 | HUMAN HGNC=24634 UniProtKB=Q9UBC2,HUMAN HGNC=3419 UniProtKB=P42566,HUMAN HGNC=561 UniProtKB=O95782                                                                                                                                                                                                                                                                                                                                                                                                                                                                                                                                                                                                                                                                                                                                                                                                                                                                                                                                                                                                                                                                                                                                                                                                                                                                                                                                                                                                                                                                                                                                                                                                                                                                                                                                                                                                                  | clathrin-coated pit                                     |
| PC00085    | HUMAN HGNC=15848 UniProtKB=Q14141,HUMAN HGNC=3383 UniProtKB=P27105,HUMAN HGNC=9164 UniProtKB=Q99719,HUMAN HGNC=9070 UniProtKB=P08567,HUMAN HGNC=1717 UniProtKB=Q16181,HUMAN HGNC=7729 UniProtKB=Q15019                                                                                                                                                                                                                                                                                                                                                                                                                                                                                                                                                                                                                                                                                                                                                                                                                                                                                                                                                                                                                                                                                                                                                                                                                                                                                                                                                                                                                                                                                                                                                                                                                                                                                                              | cytoskeletal protein                                    |

|           |                                                                                                                                                                                                                                                                                                             |                                                           |
|-----------|-------------------------------------------------------------------------------------------------------------------------------------------------------------------------------------------------------------------------------------------------------------------------------------------------------------|-----------------------------------------------------------|
| GO:000862 |                                                                                                                                                                                                                                                                                                             | epsilon DNA polymerase                                    |
| 2         | HUMAN HGNC=26200 UniProtKB=Q9H668                                                                                                                                                                                                                                                                           | complex                                                   |
| GO:190126 |                                                                                                                                                                                                                                                                                                             | carbohydrate derivative                                   |
| 4         | HUMAN HGNC=30220 UniProtKB=Q96AA3                                                                                                                                                                                                                                                                           | transport                                                 |
| GO:001622 |                                                                                                                                                                                                                                                                                                             |                                                           |
| 6         | HUMAN HGNC=3951 UniProtKB=Q16595                                                                                                                                                                                                                                                                            | iron-sulfur cluster assembly                              |
|           | HUMAN HGNC=6767 UniProtKB=Q15797,HUMAN HGNC=12458 UniProtKB=P62987,HUMAN HGNC=12468 UniProtKB=P0CG48,HUMAN HGNC=5239 UniProtKB=P17066,HUMAN HGNC=2552 UniProtKB=Q13617,HUMAN HGNC=5240 UniProtKB=P48741,HUMAN HGNC=2551 UniProtKB=Q13616,HUMAN HGNC=7732 UniProtKB=Q15843,HUMAN HGNC=12463 UniProtKB=P0CG47 | ubiquitin protein ligase binding                          |
| GO:003162 |                                                                                                                                                                                                                                                                                                             |                                                           |
| 5         | HUMAN HGNC=6891 UniProtKB=Q15555,HUMAN HGNC=6890 UniProtKB=Q15691,HUMAN HGNC=28959 UniProtKB=Q14008                                                                                                                                                                                                         | microtubule plus-end                                      |
| GO:003537 |                                                                                                                                                                                                                                                                                                             |                                                           |
| 1         | HUMAN HGNC=1628 UniProtKB=P08571,HUMAN HGNC=11512 UniProtKB=Q9H2B2                                                                                                                                                                                                                                          | signal release                                            |
| GO:002306 |                                                                                                                                                                                                                                                                                                             | regulation of muscle contraction                          |
| 1         |                                                                                                                                                                                                                                                                                                             |                                                           |
| GO:000693 |                                                                                                                                                                                                                                                                                                             | mitochondrial membrane organization                       |
| 7         | HUMAN HGNC=544 UniProtKB=P08133                                                                                                                                                                                                                                                                             | cellular iron ion homeostasis                             |
| GO:000700 |                                                                                                                                                                                                                                                                                                             |                                                           |
| 6         | HUMAN HGNC=26801 UniProtKB=Q8N8Q8                                                                                                                                                                                                                                                                           |                                                           |
| GO:000687 |                                                                                                                                                                                                                                                                                                             |                                                           |
| 9         | HUMAN HGNC=3951 UniProtKB=Q16595,HUMAN HGNC=11763 UniProtKB=P02786                                                                                                                                                                                                                                          |                                                           |
|           | HUMAN HGNC=26068 UniProtKB=Q6IAA8,HUMAN HGNC=17955 UniProtKB=O43504,HUMAN HGNC=1628 UniProtKB=P08571,HUMAN HGNC=15606 UniProtKB=Q9UHA4                                                                                                                                                                      | membrane raft                                             |
| GO:004512 |                                                                                                                                                                                                                                                                                                             |                                                           |
| 1         |                                                                                                                                                                                                                                                                                                             |                                                           |
| GO:000586 |                                                                                                                                                                                                                                                                                                             |                                                           |
| 8         | HUMAN HGNC=15476 UniProtKB=P63167                                                                                                                                                                                                                                                                           | cytoplasmic dynein complex                                |
| GO:000373 |                                                                                                                                                                                                                                                                                                             |                                                           |
| 0         | HUMAN HGNC=17150 UniProtKB=Q9Y2V2,HUMAN HGNC=21539 UniProtKB=Q9BX46,HUMAN HGNC=17860 UniProtKB=Q8NC51                                                                                                                                                                                                       | mRNA 3'-UTR binding                                       |
| GO:004240 |                                                                                                                                                                                                                                                                                                             |                                                           |
| 7         | HUMAN HGNC=6047 UniProtKB=Q16891                                                                                                                                                                                                                                                                            | cristae formation                                         |
| GO:004593 |                                                                                                                                                                                                                                                                                                             | positive regulation of mitotic cell cycle                 |
| 1         | HUMAN HGNC=533 UniProtKB=P04083                                                                                                                                                                                                                                                                             |                                                           |
|           | HUMAN HGNC=2974 UniProtKB=P50570,HUMAN HGNC=29125 UniProtKB=Q9UQ16,HUMAN HGNC=24634 UniProtKB=Q9UBC2,HUMAN HGNC=2092 UniProtKB=Q00610,HUMAN HGNC=3419 UniProtKB=P42566                                                                                                                                      | membrane coat                                             |
| GO:003011 |                                                                                                                                                                                                                                                                                                             | regulation of biological quality                          |
| 7         |                                                                                                                                                                                                                                                                                                             |                                                           |
| GO:006500 |                                                                                                                                                                                                                                                                                                             | proton-transporting ATP synthase complex                  |
| 8         | HUMAN Gene=EIF2S3L UniProtKB=Q2VIR3                                                                                                                                                                                                                                                                         | actomyosin structure organization                         |
| GO:004525 |                                                                                                                                                                                                                                                                                                             | attachment of mitotic spindle microtubules to kinetochore |
| 9         | HUMAN HGNC=833 UniProtKB=P36542                                                                                                                                                                                                                                                                             | intermediate filament binding protein                     |
| GO:003103 |                                                                                                                                                                                                                                                                                                             | response to peptide hormone                               |
| 2         | HUMAN HGNC=10252 UniProtKB=O75116,HUMAN HGNC=1738 UniProtKB=Q9Y5S2                                                                                                                                                                                                                                          | leukocyte activation                                      |
|           |                                                                                                                                                                                                                                                                                                             | involved in immune response                               |
| GO:005131 |                                                                                                                                                                                                                                                                                                             |                                                           |
| 5         | HUMAN HGNC=5048 UniProtKB=Q00839                                                                                                                                                                                                                                                                            |                                                           |
|           | HUMAN HGNC=1090 UniProtKB=Q03001,HUMAN HGNC=9069 UniProtKB=Q15149                                                                                                                                                                                                                                           |                                                           |
| PC00130   |                                                                                                                                                                                                                                                                                                             |                                                           |
| GO:004343 |                                                                                                                                                                                                                                                                                                             |                                                           |
| 4         | HUMAN HGNC=8601 UniProtKB=Q06141,HUMAN HGNC=533 UniProtKB=P04083                                                                                                                                                                                                                                            |                                                           |
|           |                                                                                                                                                                                                                                                                                                             |                                                           |
| GO:000236 |                                                                                                                                                                                                                                                                                                             |                                                           |
| 6         | HUMAN HGNC=11491 UniProtKB=P43405,HUMAN HGNC=6517 UniProtKB=P18428                                                                                                                                                                                                                                          |                                                           |

|           |                                                                                                                                                                                                                                                                                                                                                                                                                                                                                                                                                                                                                                                                                                                                                                                                                                                                                                                                                                                                                                                                                                                                                                                                                                                                                                                                                                                                                                                                                                                                                                                                                                     |                             |
|-----------|-------------------------------------------------------------------------------------------------------------------------------------------------------------------------------------------------------------------------------------------------------------------------------------------------------------------------------------------------------------------------------------------------------------------------------------------------------------------------------------------------------------------------------------------------------------------------------------------------------------------------------------------------------------------------------------------------------------------------------------------------------------------------------------------------------------------------------------------------------------------------------------------------------------------------------------------------------------------------------------------------------------------------------------------------------------------------------------------------------------------------------------------------------------------------------------------------------------------------------------------------------------------------------------------------------------------------------------------------------------------------------------------------------------------------------------------------------------------------------------------------------------------------------------------------------------------------------------------------------------------------------------|-----------------------------|
| GO:004232 |                                                                                                                                                                                                                                                                                                                                                                                                                                                                                                                                                                                                                                                                                                                                                                                                                                                                                                                                                                                                                                                                                                                                                                                                                                                                                                                                                                                                                                                                                                                                                                                                                                     | regulation of               |
| 5         | HUMAN HGNC=2288 UniProtKB=P14406                                                                                                                                                                                                                                                                                                                                                                                                                                                                                                                                                                                                                                                                                                                                                                                                                                                                                                                                                                                                                                                                                                                                                                                                                                                                                                                                                                                                                                                                                                                                                                                                    | phosphorylation             |
| GO:200124 |                                                                                                                                                                                                                                                                                                                                                                                                                                                                                                                                                                                                                                                                                                                                                                                                                                                                                                                                                                                                                                                                                                                                                                                                                                                                                                                                                                                                                                                                                                                                                                                                                                     | regulation of intrinsic     |
| 2         | HUMAN HGNC=1050 UniProtKB=P55957                                                                                                                                                                                                                                                                                                                                                                                                                                                                                                                                                                                                                                                                                                                                                                                                                                                                                                                                                                                                                                                                                                                                                                                                                                                                                                                                                                                                                                                                                                                                                                                                    | apoptotic signaling pathway |
| GO:000092 | HUMAN HGNC=28959 UniProtKB=Q14008,HUMAN HGNC=14906                                                                                                                                                                                                                                                                                                                                                                                                                                                                                                                                                                                                                                                                                                                                                                                                                                                                                                                                                                                                                                                                                                                                                                                                                                                                                                                                                                                                                                                                                                                                                                                  |                             |
| 2         | UniProtKB=Q8N4C6                                                                                                                                                                                                                                                                                                                                                                                                                                                                                                                                                                                                                                                                                                                                                                                                                                                                                                                                                                                                                                                                                                                                                                                                                                                                                                                                                                                                                                                                                                                                                                                                                    | spindle pole                |
|           | HUMAN HGNC=5753 UniProtKB=P01593,HUMAN HGNC=5739 UniProtKB=A0A075B6S9,HUMAN HGNC=5879 UniProtKB=P01699,HUMAN HGNC=5825 UniProtKB=A0A0C4DH25,HUMAN HGNC=5800 UniProtKB=A0A075B6S2,HUMAN HGNC=5880 UniProtKB=P01700,HUMAN HGNC=5905 UniProtKB=P80748,HUMAN HGNC=5742 UniProtKB=A0A0C4DH72,HUMAN HGNC=5756 UniProtKB=P04432,HUMAN HGNC=5896 UniProtKB=P01715,HUMAN HGNC=5816 UniProtKB=P01624,HUMAN Gene=KV311_HUMAN UniProtKB=P04433,HUMAN HGNC=5910 UniProtKB=P01718,HUMAN HGNC=5931 UniProtKB=A0A075B6I0,HUMAN HGNC=5735 UniProtKB=A0A075B6S5,HUMAN HGNC=5933 UniProtKB=A0A0B4J1Y8,HUMAN HGNC=5877 UniProtKB=P01703,HUMAN HGNC=5785 UniProtKB=P06310,HUMAN HGNC=5834 UniProtKB=P06312,HUMAN HGNC=5836 UniProtKB=A0A0C4DH24,HUMAN HGNC=5895 UniProtKB=P01709,HUMAN HGNC=5898 UniProtKB=A0A075B6K2,HUMAN HGNC=5887 UniProtKB=P01706,HUMAN HGNC=5929 UniProtKB=P04211,HUMAN HGNC=5882 UniProtKB=P01701,HUMAN HGNC=5890 UniProtKB=P01705,HUMAN HGNC=5732 UniProtKB=P04430,HUMAN HGNC=5759 UniProtKB=A0A087WSZ0,HUMAN HGNC=5733 UniProtKB=P01599,HUMAN HGNC=5908 UniProtKB=P01717,HUMAN HGNC=5746 UniProtKB=P01611,HUMAN HGNC=5821 UniProtKB=A0A075B6H7,HUMAN HGNC=5888 UniProtKB=P01704,HUMAN HGNC=5889 UniProtKB=A0A075B6J9,HUMAN HGNC=5927 UniProtKB=P01721,HUMAN HGNC=5897 UniProtKB=A0A075B6K4,HUMAN HGNC=5741 UniProtKB=P01602,HUMAN HGNC=5730 UniProtKB=A0A0C4DH73,HUMAN HGNC=5918 UniProtKB=A0A075B6K5,HUMAN HGNC=5817 UniProtKB=P01619,HUMAN HGNC=5781 UniProtKB=A0A0C4DH68,HUMAN HGNC=5783 UniProtKB=A0A075B6P5,HUMAN HGNC=5930 UniProtKB=A0A075B6I9,HUMAN HGNC=5901 UniProtKB=A0A075B6K0,HUMAN HGNC=5743 UniProtKB=A0A0C4DH67 |                             |
| GO:000237 |                                                                                                                                                                                                                                                                                                                                                                                                                                                                                                                                                                                                                                                                                                                                                                                                                                                                                                                                                                                                                                                                                                                                                                                                                                                                                                                                                                                                                                                                                                                                                                                                                                     | immunoglobulin production   |
| 7         | HUMAN HGNC=12347 UniProtKB=Q9Y4A5,HUMAN HGNC=18807                                                                                                                                                                                                                                                                                                                                                                                                                                                                                                                                                                                                                                                                                                                                                                                                                                                                                                                                                                                                                                                                                                                                                                                                                                                                                                                                                                                                                                                                                                                                                                                  | transcription coregulator   |
| GO:000371 | UniProtKB=O94983,HUMAN HGNC=11767 UniProtKB=O43294                                                                                                                                                                                                                                                                                                                                                                                                                                                                                                                                                                                                                                                                                                                                                                                                                                                                                                                                                                                                                                                                                                                                                                                                                                                                                                                                                                                                                                                                                                                                                                                  | activity                    |
| 2         | HUMAN HGNC=1101 UniProtKB=P51587,HUMAN HGNC=9813 UniProtKB=P54727                                                                                                                                                                                                                                                                                                                                                                                                                                                                                                                                                                                                                                                                                                                                                                                                                                                                                                                                                                                                                                                                                                                                                                                                                                                                                                                                                                                                                                                                                                                                                                   | damaged DNA-binding protein |
| PC00086   |                                                                                                                                                                                                                                                                                                                                                                                                                                                                                                                                                                                                                                                                                                                                                                                                                                                                                                                                                                                                                                                                                                                                                                                                                                                                                                                                                                                                                                                                                                                                                                                                                                     |                             |
| GO:000449 |                                                                                                                                                                                                                                                                                                                                                                                                                                                                                                                                                                                                                                                                                                                                                                                                                                                                                                                                                                                                                                                                                                                                                                                                                                                                                                                                                                                                                                                                                                                                                                                                                                     |                             |
| 7         | HUMAN HGNC=2689 UniProtKB=P09172                                                                                                                                                                                                                                                                                                                                                                                                                                                                                                                                                                                                                                                                                                                                                                                                                                                                                                                                                                                                                                                                                                                                                                                                                                                                                                                                                                                                                                                                                                                                                                                                    | monooxygenase activity      |
| GO:000920 |                                                                                                                                                                                                                                                                                                                                                                                                                                                                                                                                                                                                                                                                                                                                                                                                                                                                                                                                                                                                                                                                                                                                                                                                                                                                                                                                                                                                                                                                                                                                                                                                                                     | ribonucleoside triphosphate |
| 1         | HUMAN HGNC=2520 UniProtKB=Q9NRF8                                                                                                                                                                                                                                                                                                                                                                                                                                                                                                                                                                                                                                                                                                                                                                                                                                                                                                                                                                                                                                                                                                                                                                                                                                                                                                                                                                                                                                                                                                                                                                                                    | biosynthetic process        |
| GO:000028 |                                                                                                                                                                                                                                                                                                                                                                                                                                                                                                                                                                                                                                                                                                                                                                                                                                                                                                                                                                                                                                                                                                                                                                                                                                                                                                                                                                                                                                                                                                                                                                                                                                     |                             |
| 1         | HUMAN HGNC=10252 UniProtKB=O75116                                                                                                                                                                                                                                                                                                                                                                                                                                                                                                                                                                                                                                                                                                                                                                                                                                                                                                                                                                                                                                                                                                                                                                                                                                                                                                                                                                                                                                                                                                                                                                                                   | mitotic cytokinesis         |
|           |                                                                                                                                                                                                                                                                                                                                                                                                                                                                                                                                                                                                                                                                                                                                                                                                                                                                                                                                                                                                                                                                                                                                                                                                                                                                                                                                                                                                                                                                                                                                                                                                                                     | positive regulation of      |
| GO:000270 |                                                                                                                                                                                                                                                                                                                                                                                                                                                                                                                                                                                                                                                                                                                                                                                                                                                                                                                                                                                                                                                                                                                                                                                                                                                                                                                                                                                                                                                                                                                                                                                                                                     | leukocyte mediated          |
| 5         | HUMAN HGNC=11491 UniProtKB=P43405                                                                                                                                                                                                                                                                                                                                                                                                                                                                                                                                                                                                                                                                                                                                                                                                                                                                                                                                                                                                                                                                                                                                                                                                                                                                                                                                                                                                                                                                                                                                                                                                   | immunity                    |
|           | HUMAN HGNC=10719 UniProtKB=Q13228,HUMAN HGNC=21245                                                                                                                                                                                                                                                                                                                                                                                                                                                                                                                                                                                                                                                                                                                                                                                                                                                                                                                                                                                                                                                                                                                                                                                                                                                                                                                                                                                                                                                                                                                                                                                  |                             |
| PC00090   | UniProtKB=Q6UXB8                                                                                                                                                                                                                                                                                                                                                                                                                                                                                                                                                                                                                                                                                                                                                                                                                                                                                                                                                                                                                                                                                                                                                                                                                                                                                                                                                                                                                                                                                                                                                                                                                    | defense/immunity protein    |
| GO:000489 | HUMAN HGNC=1681 UniProtKB=P16070,HUMAN HGNC=19100                                                                                                                                                                                                                                                                                                                                                                                                                                                                                                                                                                                                                                                                                                                                                                                                                                                                                                                                                                                                                                                                                                                                                                                                                                                                                                                                                                                                                                                                                                                                                                                   |                             |
| 6         | UniProtKB=Q5VWK5                                                                                                                                                                                                                                                                                                                                                                                                                                                                                                                                                                                                                                                                                                                                                                                                                                                                                                                                                                                                                                                                                                                                                                                                                                                                                                                                                                                                                                                                                                                                                                                                                    | cytokine receptor activity  |

|           |                                                                                                                                                                                                                                                                                                                                                                                                                                                                                                                                                                                                                                                                                                                     |  |                                                               |
|-----------|---------------------------------------------------------------------------------------------------------------------------------------------------------------------------------------------------------------------------------------------------------------------------------------------------------------------------------------------------------------------------------------------------------------------------------------------------------------------------------------------------------------------------------------------------------------------------------------------------------------------------------------------------------------------------------------------------------------------|--|---------------------------------------------------------------|
| GO:190532 |                                                                                                                                                                                                                                                                                                                                                                                                                                                                                                                                                                                                                                                                                                                     |  | telomere-telomerase                                           |
| 4         | HUMAN HGNC=5048 UniProtKB=Q00839                                                                                                                                                                                                                                                                                                                                                                                                                                                                                                                                                                                                                                                                                    |  | complex assembly                                              |
|           | HUMAN HGNC=17780 UniProtKB=Q562R1,HUMAN HGNC=167 UniProtKB=P61163,HUMAN HGNC=169 UniProtKB=P61160,HUMAN HGNC=143 UniProtKB=P68032,HUMAN HGNC=14653 UniProtKB=Q9HBI1,HUMAN HGNC=170 UniProtKB=P61158,HUMAN HGNC=144 UniProtKB=P63261                                                                                                                                                                                                                                                                                                                                                                                                                                                                                 |  | actin and actin related protein                               |
| PC00039   | HUMAN HGNC=333 UniProtKB=P01019,HUMAN HGNC=2479 UniProtKB=O76096,HUMAN HGNC=8583 UniProtKB=P05121,HUMAN HGNC=3311 UniProtKB=P30740,HUMAN HGNC=8948 UniProtKB=P29622,HUMAN HGNC=1546 UniProtKB=P50454,HUMAN HGNC=8941 UniProtKB=P01009,HUMAN HGNC=1540 UniProtKB=P08185,HUMAN HGNC=8824 UniProtKB=P36955,HUMAN HGNC=8942 UniProtKB=P48595,HUMAN HGNC=3658 UniProtKB=Q9UGM5,HUMAN HGNC=11820 UniProtKB=P01033,HUMAN HGNC=10569 UniProtKB=P29508,HUMAN HGNC=4838 UniProtKB=P05546,HUMAN HGNC=6383 UniProtKB=P01042,HUMAN HGNC=16 UniProtKB=P01011,HUMAN HGNC=775 UniProtKB=P01008,HUMAN HGNC=1228 UniProtKB=P05155,HUMAN HGNC=9075 UniProtKB=P08697,HUMAN HGNC=11583 UniProtKB=P05543,HUMAN HGNC=8955 UniProtKB=P50453 |  |                                                               |
| GO:001095 |                                                                                                                                                                                                                                                                                                                                                                                                                                                                                                                                                                                                                                                                                                                     |  | negative regulation of endopeptidase activity                 |
| 1         |                                                                                                                                                                                                                                                                                                                                                                                                                                                                                                                                                                                                                                                                                                                     |  |                                                               |
| GO:200125 | HUMAN HGNC=23077 UniProtKB=Q96FW1,HUMAN HGNC=5048 UniProtKB=Q00839                                                                                                                                                                                                                                                                                                                                                                                                                                                                                                                                                                                                                                                  |  | negative regulation of chromosome organization                |
| 1         |                                                                                                                                                                                                                                                                                                                                                                                                                                                                                                                                                                                                                                                                                                                     |  |                                                               |
| GO:000809 |                                                                                                                                                                                                                                                                                                                                                                                                                                                                                                                                                                                                                                                                                                                     |  | DNA-dependent ATPase activity                                 |
| 4         | HUMAN HGNC=7326 UniProtKB=P20585                                                                                                                                                                                                                                                                                                                                                                                                                                                                                                                                                                                                                                                                                    |  |                                                               |
| GO:199077 |                                                                                                                                                                                                                                                                                                                                                                                                                                                                                                                                                                                                                                                                                                                     |  | protein localization to cell periphery                        |
| 8         | HUMAN HGNC=1406 UniProtKB=Q9Y698                                                                                                                                                                                                                                                                                                                                                                                                                                                                                                                                                                                                                                                                                    |  |                                                               |
| GO:000636 |                                                                                                                                                                                                                                                                                                                                                                                                                                                                                                                                                                                                                                                                                                                     |  | transcription by RNA polymerase I                             |
| 0         | HUMAN HGNC=25758 UniProtKB=Q8TED0                                                                                                                                                                                                                                                                                                                                                                                                                                                                                                                                                                                                                                                                                   |  |                                                               |
|           |                                                                                                                                                                                                                                                                                                                                                                                                                                                                                                                                                                                                                                                                                                                     |  | transcription regulatory region sequence-specific DNA binding |
| GO:000097 | HUMAN HGNC=9885 UniProtKB=P29374,HUMAN HGNC=10774 UniProtKB=P23246,HUMAN HGNC=10055 UniProtKB=Q8N5U6                                                                                                                                                                                                                                                                                                                                                                                                                                                                                                                                                                                                                |  |                                                               |
| 6         |                                                                                                                                                                                                                                                                                                                                                                                                                                                                                                                                                                                                                                                                                                                     |  |                                                               |
| GO:000034 |                                                                                                                                                                                                                                                                                                                                                                                                                                                                                                                                                                                                                                                                                                                     |  | THO complex                                                   |
| 7         | HUMAN HGNC=19072 UniProtKB=Q96J01                                                                                                                                                                                                                                                                                                                                                                                                                                                                                                                                                                                                                                                                                   |  |                                                               |
|           | HUMAN HGNC=122 UniProtKB=P24666,HUMAN HGNC=9300 UniProtKB=P62714,HUMAN HGNC=9635 UniProtKB=Q12974,HUMAN HGNC=9658 UniProtKB=P29350,HUMAN HGNC=19388 UniProtKB=P49593,HUMAN HGNC=9666 UniProtKB=P08575,HUMAN HGNC=9299 UniProtKB=P67775,HUMAN HGNC=9314 UniProtKB=Q08209,HUMAN HGNC=9673 UniProtKB=Q12913,HUMAN HGNC=9304 UniProtKB=P63151,HUMAN HGNC=9281 UniProtKB=P62136                                                                                                                                                                                                                                                                                                                                          |  | protein phosphatase calcium channel regulator activity        |
| PC00195   |                                                                                                                                                                                                                                                                                                                                                                                                                                                                                                                                                                                                                                                                                                                     |  |                                                               |
| GO:000524 | HUMAN HGNC=4234 UniProtKB=P55040                                                                                                                                                                                                                                                                                                                                                                                                                                                                                                                                                                                                                                                                                    |  |                                                               |
| 6         |                                                                                                                                                                                                                                                                                                                                                                                                                                                                                                                                                                                                                                                                                                                     |  |                                                               |
| GO:001635 |                                                                                                                                                                                                                                                                                                                                                                                                                                                                                                                                                                                                                                                                                                                     |  | dendrite development                                          |
| 8         | HUMAN HGNC=6835 UniProtKB=P78559                                                                                                                                                                                                                                                                                                                                                                                                                                                                                                                                                                                                                                                                                    |  |                                                               |
|           | HUMAN HGNC=20471 UniProtKB=O95777,HUMAN HGNC=5046 UniProtKB=P52272,HUMAN HGNC=5043 UniProtKB=P31942,HUMAN HGNC=17259 UniProtKB=Q9Y4Z0                                                                                                                                                                                                                                                                                                                                                                                                                                                                                                                                                                               |  | RNA splicing factor                                           |
| PC00148   |                                                                                                                                                                                                                                                                                                                                                                                                                                                                                                                                                                                                                                                                                                                     |  | regulation of intracellular pH                                |
| GO:005145 | HUMAN HGNC=11030 UniProtKB=Q9Y6R1,HUMAN HGNC=11027 UniProtKB=P02730,HUMAN HGNC=11034 UniProtKB=Q2Y0W8                                                                                                                                                                                                                                                                                                                                                                                                                                                                                                                                                                                                               |  |                                                               |
| 3         | HUMAN HGNC=1406 UniProtKB=Q9Y698,HUMAN HGNC=15474 UniProtKB=Q9Y566,HUMAN HGNC=14294 UniProtKB=Q9BYB0,HUMAN HGNC=30377 UniProtKB=Q14160                                                                                                                                                                                                                                                                                                                                                                                                                                                                                                                                                                              |  | ionotropic glutamate receptor complex                         |
| GO:000832 |                                                                                                                                                                                                                                                                                                                                                                                                                                                                                                                                                                                                                                                                                                                     |  |                                                               |
| 8         |                                                                                                                                                                                                                                                                                                                                                                                                                                                                                                                                                                                                                                                                                                                     |  |                                                               |

|            |                                                                                                                                                                                                                                      |                                                                                   |
|------------|--------------------------------------------------------------------------------------------------------------------------------------------------------------------------------------------------------------------------------------|-----------------------------------------------------------------------------------|
| GO:0032587 | HUMAN HGNC=21295 UniProtKB=Q8TE68<br>HUMAN HGNC=654 UniProtKB=P61204,HUMAN HGNC=692 UniProtKB=P40616,HUMAN HGNC=652 UniProtKB=P84077,HUMAN HGNC=659 UniProtKB=P62330,HUMAN HGNC=658 UniProtKB=P84085,HUMAN HGNC=655 UniProtKB=P18085 | ruffle membrane                                                                   |
| PC00020    | HUMAN HGNC=1736 UniProtKB=P60953,HUMAN HGNC=11138 UniProtKB=P37840                                                                                                                                                                   | G-protein                                                                         |
| GO:0050808 |                                                                                                                                                                                                                                      | synapse organization                                                              |
| GO:0006515 | HUMAN HGNC=12666 UniProtKB=P55072,HUMAN HGNC=15663 UniProtKB=Q9NYU2                                                                                                                                                                  | protein quality control for misfolded or incompletely synthesized proteins        |
| GO:0008374 | HUMAN HGNC=6522 UniProtKB=P04180,HUMAN HGNC=30244 UniProtKB=Q6P1A2,HUMAN HGNC=2328 UniProtKB=P50416                                                                                                                                  | O-acyltransferase activity                                                        |
| GO:0045277 | HUMAN HGNC=7687 UniProtKB=O00483,HUMAN HGNC=2265 UniProtKB=P13073,HUMAN HGNC=2267 UniProtKB=P20674                                                                                                                                   | respiratory chain complex IV                                                      |
| GO:0044853 | HUMAN HGNC=10690 UniProtKB=O95810,HUMAN HGNC=3757 UniProtKB=O75955,HUMAN HGNC=243 UniProtKB=P35611                                                                                                                                   | plasma membrane raft                                                              |
| GO:0071013 | HUMAN HGNC=29513 UniProtKB=O60306,HUMAN HGNC=5048 UniProtKB=Q00839                                                                                                                                                                   | catalytic step 2 spliceosome                                                      |
| GO:0006122 | HUMAN HGNC=12582 UniProtKB=P14927,HUMAN HGNC=12590 UniProtKB=P07919,HUMAN HGNC=19986 UniProtKB=P99999                                                                                                                                | mitochondrial electron transport, ubiquinol to cytochrome c                       |
| GO:0030512 | HUMAN HGNC=23688 UniProtKB=Q86UU0                                                                                                                                                                                                    | negative regulation of transforming growth factor beta receptor signaling pathway |
| GO:0008016 | HUMAN HGNC=10582 UniProtKB=Q9Y5Y9                                                                                                                                                                                                    | regulation of heart contraction                                                   |
| GO:0006415 | HUMAN HGNC=4622 UniProtKB=Q8IYD1,HUMAN HGNC=4621 UniProtKB=P15170                                                                                                                                                                    | translational termination                                                         |
| GO:0003678 | HUMAN HGNC=10474 UniProtKB=Q9Y265,HUMAN HGNC=20473 UniProtKB=Q9BX63,HUMAN HGNC=10475 UniProtKB=Q9Y230                                                                                                                                | DNA helicase activity                                                             |
| GO:0016407 | HUMAN HGNC=94 UniProtKB=Q9BWD1                                                                                                                                                                                                       | acetyltransferase activity                                                        |
| GO:0007005 | HUMAN HGNC=3951 UniProtKB=Q16595,HUMAN HGNC=24808 UniProtKB=O14545,HUMAN HGNC=2288 UniProtKB=P14406,HUMAN HGNC=23594 UniProtKB=Q709C8                                                                                                | mitochondrion organization                                                        |
| GO:0008289 | HUMAN HGNC=25268 UniProtKB=Q96LR9,HUMAN HGNC=9922 UniProtKB=P02753,HUMAN HGNC=607 UniProtKB=P02654,HUMAN HGNC=317 UniProtKB=P02771,HUMAN HGNC=618 UniProtKB=O14791,HUMAN HGNC=121 UniProtKB=O15254,HUMAN HGNC=119 UniProtKB=Q15067   | lipid binding                                                                     |
| GO:1990542 | HUMAN HGNC=5261 UniProtKB=P10809,HUMAN HGNC=23526 UniProtKB=Q8NE86,HUMAN HGNC=830 UniProtKB=P06576,HUMAN HGNC=850 UniProtKB=P48047                                                                                                   | mitochondrial transmembrane transport                                             |
| GO:0031056 | HUMAN HGNC=23077 UniProtKB=Q96FW1                                                                                                                                                                                                    | regulation of histone modification                                                |
| GO:0005911 | HUMAN HGNC=6616 UniProtKB=P48059,HUMAN HGNC=3048 UniProtKB=Q02413                                                                                                                                                                    | cell-cell junction                                                                |
| GO:0006636 | HUMAN HGNC=533 UniProtKB=P04083                                                                                                                                                                                                      | unsaturated fatty acid biosynthetic process                                       |
| GO:0031330 | HUMAN HGNC=11820 UniProtKB=P01033                                                                                                                                                                                                    | negative regulation of cellular catabolic process                                 |

|           |   |                                                                                                                                                                                                                                                                                                                                                                                                                                                                                                                                                                                                                                                                                                                                                                                               |                                                                                 |
|-----------|---|-----------------------------------------------------------------------------------------------------------------------------------------------------------------------------------------------------------------------------------------------------------------------------------------------------------------------------------------------------------------------------------------------------------------------------------------------------------------------------------------------------------------------------------------------------------------------------------------------------------------------------------------------------------------------------------------------------------------------------------------------------------------------------------------------|---------------------------------------------------------------------------------|
| GO:007084 | 7 | HUMAN HGNC=11957 UniProtKB=Q93074                                                                                                                                                                                                                                                                                                                                                                                                                                                                                                                                                                                                                                                                                                                                                             | core mediator complex                                                           |
| GO:000289 | 1 | HUMAN HGNC=16961 UniProtKB=Q15762                                                                                                                                                                                                                                                                                                                                                                                                                                                                                                                                                                                                                                                                                                                                                             | positive regulation of immunoglobulin mediated immune response                  |
| GO:000854 | 1 | HUMAN HGNC=9556 UniProtKB=O00231                                                                                                                                                                                                                                                                                                                                                                                                                                                                                                                                                                                                                                                                                                                                                              | proteasome regulatory particle, lid subcomplex                                  |
|           |   | HUMAN HGNC=3530 UniProtKB=P00748,HUMAN HGNC=3531 UniProtKB=P00488,HUMAN HGNC=3537 UniProtKB=P25116,HUMAN HGNC=13937 UniProtKB=O95866,HUMAN HGNC=6383 UniProtKB=P01042,HUMAN HGNC=12726 UniProtKB=P04275,HUMAN HGNC=2300 UniProtKB=Q96IY4                                                                                                                                                                                                                                                                                                                                                                                                                                                                                                                                                      | blood coagulation                                                               |
| GO:000759 | 6 | HUMAN HGNC=8876 UniProtKB=P17858,HUMAN HGNC=24552 UniProtKB=Q3LXA3,HUMAN HGNC=4922 UniProtKB=P19367,HUMAN HGNC=9021 UniProtKB=P14618,HUMAN HGNC=8878 UniProtKB=Q01813,HUMAN HGNC=2850 UniProtKB=Q9Y6T7                                                                                                                                                                                                                                                                                                                                                                                                                                                                                                                                                                                        | phosphotransferase activity, alcohol group as acceptor                          |
| GO:001677 | 3 |                                                                                                                                                                                                                                                                                                                                                                                                                                                                                                                                                                                                                                                                                                                                                                                               | positive regulation of transcription elongation from RNA polymerase II promoter |
| GO:003296 | 8 | HUMAN HGNC=11617 UniProtKB=Q15369                                                                                                                                                                                                                                                                                                                                                                                                                                                                                                                                                                                                                                                                                                                                                             |                                                                                 |
|           |   | HUMAN HGNC=1623 UniProtKB=P50990,HUMAN HGNC=1617 UniProtKB=P50991,HUMAN HGNC=1622 UniProtKB=Q99832,HUMAN HGNC=30167 UniProtKB=P13667,HUMAN HGNC=4926 UniProtKB=O15212,HUMAN HGNC=1455 UniProtKB=P27797,HUMAN HGNC=1735 UniProtKB=Q16543,HUMAN HGNC=11582 UniProtKB=Q15813,HUMAN HGNC=8548 UniProtKB=P07237,HUMAN HGNC=1473 UniProtKB=P27824,HUMAN HGNC=11579 UniProtKB=O75347,HUMAN HGNC=4606 UniProtKB=P30101,HUMAN HGNC=1615 UniProtKB=P78371,HUMAN HGNC=5261 UniProtKB=P10809,HUMAN HGNC=5253 UniProtKB=P07900,HUMAN HGNC=11655 UniProtKB=P17987,HUMAN HGNC=1618 UniProtKB=P48643,HUMAN HGNC=5258 UniProtKB=P08238,HUMAN HGNC=1620 UniProtKB=P40227,HUMAN HGNC=12028 UniProtKB=P14625,HUMAN HGNC=32153 UniProtKB=A6NM43,HUMAN HGNC=9756 UniProtKB=O00391,HUMAN HGNC=30535 UniProtKB=Q8WVJ2 | protein folding                                                                 |
| GO:000645 | 7 |                                                                                                                                                                                                                                                                                                                                                                                                                                                                                                                                                                                                                                                                                                                                                                                               | cellular modified amino acid metabolic process                                  |
| GO:000657 | 5 | HUMAN HGNC=2328 UniProtKB=P50416,HUMAN HGNC=13921 UniProtKB=O95870                                                                                                                                                                                                                                                                                                                                                                                                                                                                                                                                                                                                                                                                                                                            | cell-cell adhesion via plasma-membrane adhesion molecules                       |
| GO:009874 | 2 | HUMAN HGNC=29943 UniProtKB=Q9NT68,HUMAN HGNC=8823 UniProtKB=P16284,HUMAN HGNC=15902 UniProtKB=Q8IXH8,HUMAN HGNC=14265 UniProtKB=Q86UP0                                                                                                                                                                                                                                                                                                                                                                                                                                                                                                                                                                                                                                                        | secondary active transmembrane transporter activity                             |
| GO:001529 | 1 | HUMAN HGNC=23526 UniProtKB=Q8NE86,HUMAN HGNC=10989 UniProtKB=Q00325                                                                                                                                                                                                                                                                                                                                                                                                                                                                                                                                                                                                                                                                                                                           |                                                                                 |
|           |   | HUMAN HGNC=9240 UniProtKB=P02775,HUMAN HGNC=10632 UniProtKB=P13501,HUMAN HGNC=8862 UniProtKB=P10720,HUMAN HGNC=8861 UniProtKB=P02776                                                                                                                                                                                                                                                                                                                                                                                                                                                                                                                                                                                                                                                          | chemokine receptor binding                                                      |
| GO:004237 | 9 | HUMAN HGNC=33704 UniProtKB=Q66K66,HUMAN HGNC=13206 UniProtKB=O60296,HUMAN HGNC=18756 UniProtKB=Q9BYZ6,HUMAN HGNC=3757 UniProtKB=O75955,HUMAN HGNC=9802 UniProtKB=P15153,HUMAN HGNC=570 UniProtKB=P53677,HUMAN HGNC=2974 UniProtKB=P50570,HUMAN HGNC=9801 UniProtKB=P63000,HUMAN HGNC=29125 UniProtKB=Q9UQ16,HUMAN HGNC=30138 UniProtKB=Q8N131                                                                                                                                                                                                                                                                                                                                                                                                                                                 | cytoplasmic vesicle                                                             |
| GO:003141 | 0 |                                                                                                                                                                                                                                                                                                                                                                                                                                                                                                                                                                                                                                                                                                                                                                                               |                                                                                 |

|            |                                                                                                                                                                                                                                                                                                                                                                                                                                                                        |                                                                                          |
|------------|------------------------------------------------------------------------------------------------------------------------------------------------------------------------------------------------------------------------------------------------------------------------------------------------------------------------------------------------------------------------------------------------------------------------------------------------------------------------|------------------------------------------------------------------------------------------|
| GO:0000463 | HUMAN HGNC=10363 UniProtKB=P18124                                                                                                                                                                                                                                                                                                                                                                                                                                      | maturation of LSU-rRNA from tricistronic rRNA transcript (SSU-rRNA, 5.8S rRNA, LSU-rRNA) |
| GO:0006839 | HUMAN HGNC=26801 UniProtKB=Q8N8Q8                                                                                                                                                                                                                                                                                                                                                                                                                                      | mitochondrial transport                                                                  |
| PC00221    | HUMAN HGNC=11834 UniProtKB=P29401                                                                                                                                                                                                                                                                                                                                                                                                                                      | transketolase                                                                            |
| GO:0000775 | HUMAN HGNC=4861 UniProtKB=Q9NRZ9                                                                                                                                                                                                                                                                                                                                                                                                                                       | chromosome, centromeric region                                                           |
| GO:0008380 | HUMAN HGNC=27424 UniProtKB=Q5T481,HUMAN HGNC=5043 UniProtKB=P31942,HUMAN HGNC=17894 UniProtKB=Q14966,HUMAN HGNC=347 UniProtKB=Q09666                                                                                                                                                                                                                                                                                                                                   | RNA splicing                                                                             |
| GO:0031982 | HUMAN HGNC=8898 UniProtKB=P07205,HUMAN HGNC=8044 UniProtKB=P80303,HUMAN HGNC=2478 UniProtKB=Q15828,HUMAN HGNC=11937 UniProtKB=P32970,HUMAN HGNC=10499 UniProtKB=P06702,HUMAN HGNC=5239 UniProtKB=P17066,HUMAN HGNC=11834 UniProtKB=P29401,HUMAN HGNC=28883 UniProtKB=Q9H2U2,HUMAN HGNC=5240 UniProtKB=P48741,HUMAN HGNC=21295 UniProtKB=Q8TE68,HUMAN HGNC=8043 UniProtKB=Q02818                                                                                        | vesicle                                                                                  |
| GO:0044262 | HUMAN HGNC=8876 UniProtKB=P17858,HUMAN HGNC=29035 UniProtKB=O43314,HUMAN HGNC=8878 UniProtKB=Q01813,HUMAN HGNC=6050 UniProtKB=P29218                                                                                                                                                                                                                                                                                                                                   | cellular carbohydrate metabolic process                                                  |
| GO:0043043 | HUMAN HGNC=4312 UniProtKB=P48507                                                                                                                                                                                                                                                                                                                                                                                                                                       | peptide biosynthetic process                                                             |
| GO:0051276 | HUMAN HGNC=7326 UniProtKB=P20585                                                                                                                                                                                                                                                                                                                                                                                                                                       | chromosome organization                                                                  |
| GO:0005085 | HUMAN HGNC=26068 UniProtKB=Q6IAA8,HUMAN HGNC=17955 UniProtKB=O43504,HUMAN HGNC=3208 UniProtKB=P24534,HUMAN HGNC=3211 UniProtKB=P29692                                                                                                                                                                                                                                                                                                                                  | guanyl-nucleotide exchange factor activity                                               |
| GO:0017049 | HUMAN HGNC=10252 UniProtKB=O75116                                                                                                                                                                                                                                                                                                                                                                                                                                      | GTP-Rho binding                                                                          |
| GO:0055082 | HUMAN HGNC=4922 UniProtKB=P19367                                                                                                                                                                                                                                                                                                                                                                                                                                       | cellular chemical homeostasis                                                            |
| GO:0030336 | HUMAN HGNC=9862 UniProtKB=P61225,HUMAN HGNC=7178 UniProtKB=Q13201                                                                                                                                                                                                                                                                                                                                                                                                      | negative regulation of cell migration                                                    |
| GO:0030126 | HUMAN HGNC=2230 UniProtKB=P53621,HUMAN HGNC=2231 UniProtKB=P53618,HUMAN HGNC=649 UniProtKB=P48444,HUMAN HGNC=2232 UniProtKB=P35606                                                                                                                                                                                                                                                                                                                                     | COPI vesicle coat                                                                        |
| GO:0031110 | HUMAN HGNC=6891 UniProtKB=Q15555,HUMAN HGNC=6890 UniProtKB=Q15691,HUMAN HGNC=6835 UniProtKB=P78559,HUMAN HGNC=6510 UniProtKB=P16949                                                                                                                                                                                                                                                                                                                                    | regulation of microtubule polymerization or depolymerization                             |
| GO:1902275 | HUMAN HGNC=5048 UniProtKB=Q00839                                                                                                                                                                                                                                                                                                                                                                                                                                       | regulation of chromatin organization                                                     |
| GO:0016192 | HUMAN HGNC=654 UniProtKB=P61204,HUMAN HGNC=692 UniProtKB=P40616,HUMAN HGNC=652 UniProtKB=P84077,HUMAN HGNC=4226 UniProtKB=P31150,HUMAN HGNC=575 UniProtKB=Q9Y587,HUMAN HGNC=658 UniProtKB=P84085,HUMAN HGNC=4227 UniProtKB=P50395,HUMAN HGNC=655 UniProtKB=P18085,HUMAN HGNC=5241 UniProtKB=P11142,HUMAN HGNC=6317 UniProtKB=O43896,HUMAN HGNC=659 UniProtKB=P62330,HUMAN HGNC=13667 UniProtKB=Q9BXS5,HUMAN HGNC=1365 UniProtKB=Q9UGQ2,HUMAN HGNC=554 UniProtKB=Q10567 | vesicle-mediated transport                                                               |

|                |                                                                                                                                                                                                                                                                                                                                                                                                                                                                                                                             |                                                                  |
|----------------|-----------------------------------------------------------------------------------------------------------------------------------------------------------------------------------------------------------------------------------------------------------------------------------------------------------------------------------------------------------------------------------------------------------------------------------------------------------------------------------------------------------------------------|------------------------------------------------------------------|
| GO:001646<br>2 | HUMAN HGNC=13420 UniProtKB=Q86TP1,HUMAN HGNC=28883 UniProtKB=Q9H2U2,HUMAN HGNC=8052 UniProtKB=Q9UKK9                                                                                                                                                                                                                                                                                                                                                                                                                        | pyrophosphatase activity                                         |
| GO:006028<br>5 | HUMAN HGNC=25631 UniProtKB=Q96MT7<br>HUMAN HGNC=8876 UniProtKB=P17858,HUMAN HGNC=626 UniProtKB=P07741,HUMAN HGNC=11834 UniProtKB=P29401,HUMAN HGNC=8878 UniProtKB=Q01813,HUMAN HGNC=9386 UniProtKB=Q9UGJ0                                                                                                                                                                                                                                                                                                                   | cilium-dependent cell motility                                   |
| GO:004316<br>9 | HUMAN HGNC=2479 UniProtKB=O76096,HUMAN HGNC=533 UniProtKB=P04083,HUMAN HGNC=10632 UniProtKB=P13501,HUMAN HGNC=1681 UniProtKB=P16070,HUMAN HGNC=5141 UniProtKB=P00738,HUMAN HGNC=3309 UniProtKB=P08246,HUMAN HGNC=9240 UniProtKB=P02775,HUMAN HGNC=7967 UniProtKB=Q96R11,HUMAN HGNC=8862 UniProtKB=P10720,HUMAN HGNC=8861 UniProtKB=P02776,HUMAN HGNC=1628 UniProtKB=P08571,HUMAN HGNC=5156 UniProtKB=P00739,HUMAN HGNC=6517 UniProtKB=P18428                                                                                | cation binding                                                   |
| GO:000695<br>4 |                                                                                                                                                                                                                                                                                                                                                                                                                                                                                                                             | inflammatory response                                            |
| GO:004595<br>4 | HUMAN HGNC=16961 UniProtKB=Q15762<br>HUMAN HGNC=16695 UniProtKB=P51572,HUMAN HGNC=1801 UniProtKB=O95674,HUMAN HGNC=26212 UniProtKB=P61009,HUMAN HGNC=11834 UniProtKB=P29401,HUMAN HGNC=12666 UniProtKB=P55072,HUMAN HGNC=1455 UniProtKB=P27797,HUMAN HGNC=6631 UniProtKB=P49257,HUMAN HGNC=15999 UniProtKB=Q9NZV5,HUMAN HGNC=12649 UniProtKB=O95292,HUMAN HGNC=1473 UniProtKB=P27824,HUMAN HGNC=12648 UniProtKB=Q9P0L0,HUMAN HGNC=30220 UniProtKB=Q96AA3                                                                    | positive regulation of natural killer cell mediated cytotoxicity |
| GO:000578<br>9 | HUMAN HGNC=9086 UniProtKB=P60201,HUMAN HGNC=6925 UniProtKB=P02686                                                                                                                                                                                                                                                                                                                                                                                                                                                           | endoplasmic reticulum membrane                                   |
| PC00161        | HUMAN HGNC=31332 UniProtKB=Q6IQ22,HUMAN HGNC=7007 UniProtKB=P61006,HUMAN HGNC=11446 UniProtKB=O00186,HUMAN HGNC=11442 UniProtKB=O15400,HUMAN HGNC=11445 UniProtKB=Q15833,HUMAN HGNC=11429 UniProtKB=O75558,HUMAN HGNC=9778 UniProtKB=P20337,HUMAN HGNC=12649 UniProtKB=O95292,HUMAN HGNC=649 UniProtKB=P48444,HUMAN HGNC=12648 UniProtKB=Q9P0L0,HUMAN HGNC=8016 UniProtKB=P46459                                                                                                                                            | myelin protein                                                   |
| GO:005164<br>0 |                                                                                                                                                                                                                                                                                                                                                                                                                                                                                                                             | organelle localization                                           |
| GO:003132<br>8 | HUMAN HGNC=533 UniProtKB=P04083,HUMAN HGNC=6517 UniProtKB=P18428                                                                                                                                                                                                                                                                                                                                                                                                                                                            | positive regulation of cellular biosynthetic process             |
| GO:004227<br>8 | HUMAN HGNC=5157 UniProtKB=P00492                                                                                                                                                                                                                                                                                                                                                                                                                                                                                            | purine nucleoside metabolic process                              |
| GO:006096<br>8 | HUMAN HGNC=20250 UniProtKB=Q96IF1<br>HUMAN HGNC=12407 UniProtKB=P68366,HUMAN HGNC=2949 UniProtKB=Q8TD57,HUMAN HGNC=12410 UniProtKB=Q9NY65,HUMAN HGNC=20778 UniProtKB=P07437,HUMAN HGNC=6835 UniProtKB=P78559,HUMAN HGNC=20766 UniProtKB=Q71U36,HUMAN HGNC=20774 UniProtKB=P04350,HUMAN HGNC=20771 UniProtKB=P68371,HUMAN HGNC=17060 UniProtKB=Q92845,HUMAN HGNC=30391 UniProtKB=Q9UG01,HUMAN HGNC=6325 UniProtKB=O60282,HUMAN HGNC=2952 UniProtKB=Q96JB1,HUMAN HGNC=6317 UniProtKB=O43896,HUMAN HGNC=16257 UniProtKB=Q9H4B7 | regulation of gene silencing                                     |
| GO:000587<br>4 |                                                                                                                                                                                                                                                                                                                                                                                                                                                                                                                             | microtubule                                                      |

|            |                                                                                                                                                                                                                                                                                                                                                                                                                                                                                                                                                                                                                                                                                                                                                                                                                                                                                                                                                                                                 |                                                        |
|------------|-------------------------------------------------------------------------------------------------------------------------------------------------------------------------------------------------------------------------------------------------------------------------------------------------------------------------------------------------------------------------------------------------------------------------------------------------------------------------------------------------------------------------------------------------------------------------------------------------------------------------------------------------------------------------------------------------------------------------------------------------------------------------------------------------------------------------------------------------------------------------------------------------------------------------------------------------------------------------------------------------|--------------------------------------------------------|
| GO:0030073 | HUMAN HGNC=533 UniProtKB=P04083<br>HUMAN HGNC=333 UniProtKB=P01019,HUMAN HGNC=20635 UniProtKB=Q14997,HUMAN HGNC=11092 UniProtKB=P03973,HUMAN HGNC=2482 UniProtKB=P04080,HUMAN HGNC=17943 UniProtKB=Q9GZP9,HUMAN HGNC=8824 UniProtKB=P36955,HUMAN HGNC=8942 UniProtKB=P48595,HUMAN HGNC=3658 UniProtKB=Q9UGM5,HUMAN HGNC=11820 UniProtKB=P01033,HUMAN HGNC=6383 UniProtKB=P01042,HUMAN HGNC=775 UniProtKB=P01008,HUMAN HGNC=1228 UniProtKB=P05155,HUMAN HGNC=9075 UniProtKB=P08697,HUMAN HGNC=11583 UniProtKB=P05543,HUMAN HGNC=453 UniProtKB=P02760,HUMAN HGNC=2479 UniProtKB=O76096,HUMAN HGNC=8583 UniProtKB=P05121,HUMAN HGNC=3311 UniProtKB=P30740,HUMAN HGNC=8948 UniProtKB=P29622,HUMAN HGNC=9750 UniProtKB=P20742,HUMAN HGNC=1546 UniProtKB=P50454,HUMAN HGNC=8941 UniProtKB=P01009,HUMAN HGNC=1540 UniProtKB=P08185,HUMAN HGNC=10569 UniProtKB=P29508,HUMAN HGNC=4838 UniProtKB=P05546,HUMAN HGNC=16 UniProtKB=P01011,HUMAN HGNC=9568 UniProtKB=Q06323,HUMAN HGNC=8955 UniProtKB=P50453 | insulin secretion                                      |
| GO:0002020 |                                                                                                                                                                                                                                                                                                                                                                                                                                                                                                                                                                                                                                                                                                                                                                                                                                                                                                                                                                                                 | protease binding                                       |
| GO:0008171 | HUMAN HGNC=8728 UniProtKB=P22061                                                                                                                                                                                                                                                                                                                                                                                                                                                                                                                                                                                                                                                                                                                                                                                                                                                                                                                                                                | O-methyltransferase activity                           |
| GO:0060627 | HUMAN HGNC=26486 UniProtKB=Q6PJW8,HUMAN HGNC=10534 UniProtKB=Q9NR31,HUMAN HGNC=17643 UniProtKB=Q9HD26                                                                                                                                                                                                                                                                                                                                                                                                                                                                                                                                                                                                                                                                                                                                                                                                                                                                                           | regulation of vesicle-mediated transport               |
| GO:0031497 | HUMAN HGNC=4716 UniProtKB=P16403,HUMAN HGNC=4718 UniProtKB=P10412,HUMAN HGNC=4719 UniProtKB=P16401                                                                                                                                                                                                                                                                                                                                                                                                                                                                                                                                                                                                                                                                                                                                                                                                                                                                                              | chromatin assembly                                     |
| GO:0007159 | HUMAN HGNC=23151 UniProtKB=Q86UX7,HUMAN HGNC=5261 UniProtKB=P10809,HUMAN HGNC=11491 UniProtKB=P43405,HUMAN HGNC=533 UniProtKB=P04083                                                                                                                                                                                                                                                                                                                                                                                                                                                                                                                                                                                                                                                                                                                                                                                                                                                            | leukocyte cell-cell adhesion                           |
| GO:0030837 | HUMAN HGNC=9621 UniProtKB=Q6IBS0,HUMAN HGNC=12690 UniProtKB=P09327,HUMAN HGNC=243 UniProtKB=P35611,HUMAN HGNC=1488 UniProtKB=P52907,HUMAN HGNC=3750 UniProtKB=Q13045,HUMAN HGNC=1491 UniProtKB=P47756,HUMAN HGNC=15667 UniProtKB=P58546,HUMAN HGNC=11881 UniProtKB=P62328                                                                                                                                                                                                                                                                                                                                                                                                                                                                                                                                                                                                                                                                                                                       | negative regulation of actin filament polymerization   |
| GO:0002376 | HUMAN HGNC=8993 UniProtKB=P12273                                                                                                                                                                                                                                                                                                                                                                                                                                                                                                                                                                                                                                                                                                                                                                                                                                                                                                                                                                | immune system process                                  |
| GO:0051129 |                                                                                                                                                                                                                                                                                                                                                                                                                                                                                                                                                                                                                                                                                                                                                                                                                                                                                                                                                                                                 | negative regulation of cellular component organization |
| GO:0016836 | HUMAN HGNC=25361 UniProtKB=Q8N264<br>HUMAN HGNC=8876 UniProtKB=P17858,HUMAN HGNC=118 UniProtKB=Q99798,HUMAN HGNC=16369 UniProtKB=Q99497,HUMAN HGNC=4801 UniProtKB=P40939,HUMAN HGNC=8878 UniProtKB=Q01813,HUMAN HGNC=395 UniProtKB=P13716,HUMAN HGNC=3151 UniProtKB=P30084,HUMAN HGNC=24175 UniProtKB=Q9P035,HUMAN HGNC=1368 UniProtKB=P00915,HUMAN HGNC=117 UniProtKB=P21399,HUMAN HGNC=3350 UniProtKB=P06733,HUMAN HGNC=3353 UniProtKB=P09104,HUMAN HGNC=9021 UniProtKB=P14618,HUMAN HGNC=3354 UniProtKB=P13929,HUMAN HGNC=1373 UniProtKB=P00918                                                                                                                                                                                                                                                                                                                                                                                                                                              | hydro-lyase activity                                   |
| GO:0042147 | HUMAN HGNC=11172 UniProtKB=Q13596,HUMAN HGNC=9786 UniProtKB=P20340,HUMAN HGNC=14902 UniProtKB=Q9NRW1,HUMAN HGNC=13487 UniProtKB=Q96QK1                                                                                                                                                                                                                                                                                                                                                                                                                                                                                                                                                                                                                                                                                                                                                                                                                                                          | retrograde transport, endosome to Golgi                |

|            |                                                                                                                                                                                                                                                                                                                                                                                                                                                                                                                                                                                                                                                                                                                                                                                                                                                                                                                                                                                                                                                                                                                                                                                                                                                                                                             |                                                     |
|------------|-------------------------------------------------------------------------------------------------------------------------------------------------------------------------------------------------------------------------------------------------------------------------------------------------------------------------------------------------------------------------------------------------------------------------------------------------------------------------------------------------------------------------------------------------------------------------------------------------------------------------------------------------------------------------------------------------------------------------------------------------------------------------------------------------------------------------------------------------------------------------------------------------------------------------------------------------------------------------------------------------------------------------------------------------------------------------------------------------------------------------------------------------------------------------------------------------------------------------------------------------------------------------------------------------------------|-----------------------------------------------------|
| GO:0008045 | HUMAN HGNC=9802 UniProtKB=P15153,HUMAN HGNC=9801 UniProtKB=P63000<br>HUMAN HGNC=28422 UniProtKB=Q8NCE0,HUMAN HGNC=24728 UniProtKB=A2RTX5,HUMAN HGNC=2678 UniProtKB=P14868,HUMAN HGNC=20 UniProtKB=P49588,HUMAN HGNC=4162 UniProtKB=P41250,HUMAN HGNC=11572 UniProtKB=P26639,HUMAN HGNC=16219 UniProtKB=Q8TEA8,HUMAN HGNC=12840 UniProtKB=P54577,HUMAN HGNC=12729 UniProtKB=P23381                                                                                                                                                                                                                                                                                                                                                                                                                                                                                                                                                                                                                                                                                                                                                                                                                                                                                                                           | motor neuron axon guidance                          |
| GO:0140101 | HUMAN HGNC=1628 UniProtKB=P08571,HUMAN HGNC=3157 UniProtKB=Q92838<br>HUMAN HGNC=33704 UniProtKB=Q66K66,HUMAN HGNC=4045 UniProtKB=O75084,HUMAN HGNC=23688 UniProtKB=Q86UU0,HUMAN HGNC=9275 UniProtKB=P35813,HUMAN HGNC=11119 UniProtKB=Q99835                                                                                                                                                                                                                                                                                                                                                                                                                                                                                                                                                                                                                                                                                                                                                                                                                                                                                                                                                                                                                                                                | catalytic activity, acting on a tRNA                |
| GO:0038061 | HUMAN HGNC=5241 UniProtKB=P11142,HUMAN HGNC=5269 UniProtKB=P61604,HUMAN HGNC=5239 UniProtKB=P17066,HUMAN HGNC=5238 UniProtKB=P11021,HUMAN HGNC=5270 UniProtKB=P25685,HUMAN HGNC=5240 UniProtKB=P48741,HUMAN HGNC=11343 UniProtKB=P50502                                                                                                                                                                                                                                                                                                                                                                                                                                                                                                                                                                                                                                                                                                                                                                                                                                                                                                                                                                                                                                                                     | NIK/NF-kappaB signaling                             |
| GO:0060070 | HUMAN HGNC=11030 UniProtKB=Q9Y6R1,HUMAN HGNC=11027 UniProtKB=P02730,HUMAN HGNC=11034 UniProtKB=Q2Y0W8<br>HUMAN HGNC=586 UniProtKB=P13798,HUMAN HGNC=333 UniProtKB=P01019,HUMAN HGNC=1247 UniProtKB=P09871,HUMAN HGNC=11092 UniProtKB=P03973,HUMAN HGNC=43788 UniProtKB=Q8NHM4,HUMAN HGNC=8824 UniProtKB=P36955,HUMAN HGNC=8942 UniProtKB=P48595,HUMAN HGNC=775 UniProtKB=P01008,HUMAN HGNC=1228 UniProtKB=P05155,HUMAN HGNC=9075 UniProtKB=P08697,HUMAN HGNC=5156 UniProtKB=P00739,HUMAN HGNC=6902 UniProtKB=O00187,HUMAN HGNC=11583 UniProtKB=P05543,HUMAN HGNC=453 UniProtKB=P02760,HUMAN HGNC=8583 UniProtKB=P05121,HUMAN HGNC=9495 UniProtKB=P24158,HUMAN HGNC=3311 UniProtKB=P30740,HUMAN HGNC=7380 UniProtKB=P26927,HUMAN HGNC=8948 UniProtKB=P29622,HUMAN HGNC=8569 UniProtKB=P29122,HUMAN HGNC=1546 UniProtKB=P50454,HUMAN HGNC=8941 UniProtKB=P01009,HUMAN HGNC=1540 UniProtKB=P08185,HUMAN HGNC=12016 UniProtKB=P29144,HUMAN HGNC=4798 UniProtKB=Q14520,HUMAN HGNC=3530 UniProtKB=P00748,HUMAN HGNC=5141 UniProtKB=P00738,HUMAN HGNC=10569 UniProtKB=P29508,HUMAN HGNC=4838 UniProtKB=P05546,HUMAN HGNC=3309 UniProtKB=P08246,HUMAN HGNC=21265 UniProtKB=Q9NZP8,HUMAN HGNC=16 UniProtKB=P01011,HUMAN HGNC=6901 UniProtKB=P48740,HUMAN HGNC=9071 UniProtKB=P00747,HUMAN HGNC=8955 UniProtKB=P50453 | canonical Wnt signaling pathway                     |
| GO:0006458 | HUMAN HGNC=8905 UniProtKB=P36871,HUMAN HGNC=2422 UniProtKB=O75390,HUMAN HGNC=10869 UniProtKB=Q92185<br>HUMAN HGNC=1117 UniProtKB=Q9UPA5,HUMAN HGNC=15474 UniProtKB=Q9Y566,HUMAN HGNC=13406 UniProtKB=Q9Y6V0,HUMAN HGNC=14294 UniProtKB=Q9BYB0                                                                                                                                                                                                                                                                                                                                                                                                                                                                                                                                                                                                                                                                                                                                                                                                                                                                                                                                                                                                                                                               | 'de novo' protein folding                           |
| GO:0015711 | HUMAN HGNC=9568 UniProtKB=Q06323                                                                                                                                                                                                                                                                                                                                                                                                                                                                                                                                                                                                                                                                                                                                                                                                                                                                                                                                                                                                                                                                                                                                                                                                                                                                            | organic anion transport                             |
| GO:0004252 | HUMAN HGNC=18039 UniProtKB=Q9UGL1                                                                                                                                                                                                                                                                                                                                                                                                                                                                                                                                                                                                                                                                                                                                                                                                                                                                                                                                                                                                                                                                                                                                                                                                                                                                           | serine-type endopeptidase activity                  |
| GO:0005975 |                                                                                                                                                                                                                                                                                                                                                                                                                                                                                                                                                                                                                                                                                                                                                                                                                                                                                                                                                                                                                                                                                                                                                                                                                                                                                                             | carbohydrate metabolic process                      |
| GO:0007416 |                                                                                                                                                                                                                                                                                                                                                                                                                                                                                                                                                                                                                                                                                                                                                                                                                                                                                                                                                                                                                                                                                                                                                                                                                                                                                                             | synapse assembly                                    |
| GO:0061136 |                                                                                                                                                                                                                                                                                                                                                                                                                                                                                                                                                                                                                                                                                                                                                                                                                                                                                                                                                                                                                                                                                                                                                                                                                                                                                                             | regulation of proteasomal protein catabolic process |
| GO:0032451 |                                                                                                                                                                                                                                                                                                                                                                                                                                                                                                                                                                                                                                                                                                                                                                                                                                                                                                                                                                                                                                                                                                                                                                                                                                                                                                             | demethylase activity                                |

|            |                                                                                                                                                                                                                                                                                                                                                                                                                                                                                                                                                                                                                                                                                                                                                                                                                                                                                                                                                                                                                                                                                                                                                                                                                                                                                                                                                                                                                                                                                                            |                                                                                                                         |
|------------|------------------------------------------------------------------------------------------------------------------------------------------------------------------------------------------------------------------------------------------------------------------------------------------------------------------------------------------------------------------------------------------------------------------------------------------------------------------------------------------------------------------------------------------------------------------------------------------------------------------------------------------------------------------------------------------------------------------------------------------------------------------------------------------------------------------------------------------------------------------------------------------------------------------------------------------------------------------------------------------------------------------------------------------------------------------------------------------------------------------------------------------------------------------------------------------------------------------------------------------------------------------------------------------------------------------------------------------------------------------------------------------------------------------------------------------------------------------------------------------------------------|-------------------------------------------------------------------------------------------------------------------------|
| GO:0005978 | HUMAN   HGNC=4699   UniProtKB=P46976<br>HUMAN   HGNC=910   UniProtKB=P25311, HUMAN   HGNC=4932   UniProtKB=P01889                                                                                                                                                                                                                                                                                                                                                                                                                                                                                                                                                                                                                                                                                                                                                                                                                                                                                                                                                                                                                                                                                                                                                                                                                                                                                                                                                                                          | glycogen biosynthetic process<br>major histocompatibility complex protein                                               |
| PC00149    |                                                                                                                                                                                                                                                                                                                                                                                                                                                                                                                                                                                                                                                                                                                                                                                                                                                                                                                                                                                                                                                                                                                                                                                                                                                                                                                                                                                                                                                                                                            |                                                                                                                         |
| GO:0097731 | HUMAN   HGNC=26555   UniProtKB=Q3SY00                                                                                                                                                                                                                                                                                                                                                                                                                                                                                                                                                                                                                                                                                                                                                                                                                                                                                                                                                                                                                                                                                                                                                                                                                                                                                                                                                                                                                                                                      | 9+0 non-motile cilium                                                                                                   |
| GO:0043406 | HUMAN   HGNC=8761   UniProtKB=Q9BUL8                                                                                                                                                                                                                                                                                                                                                                                                                                                                                                                                                                                                                                                                                                                                                                                                                                                                                                                                                                                                                                                                                                                                                                                                                                                                                                                                                                                                                                                                       | positive regulation of MAP kinase activity                                                                              |
| GO:0019897 | HUMAN   HGNC=15902   UniProtKB=Q8IXH8, HUMAN   HGNC=6207   UniProtKB=P14923, HUMAN   HGNC=14265   UniProtKB=Q86UP0                                                                                                                                                                                                                                                                                                                                                                                                                                                                                                                                                                                                                                                                                                                                                                                                                                                                                                                                                                                                                                                                                                                                                                                                                                                                                                                                                                                         | extrinsic component of plasma membrane activation of cysteine-type endopeptidase activity involved in apoptotic process |
| GO:0006919 | HUMAN   HGNC=1050   UniProtKB=P55957                                                                                                                                                                                                                                                                                                                                                                                                                                                                                                                                                                                                                                                                                                                                                                                                                                                                                                                                                                                                                                                                                                                                                                                                                                                                                                                                                                                                                                                                       | positive regulation of protein secretion                                                                                |
| GO:0050714 | HUMAN   HGNC=1628   UniProtKB=P08571                                                                                                                                                                                                                                                                                                                                                                                                                                                                                                                                                                                                                                                                                                                                                                                                                                                                                                                                                                                                                                                                                                                                                                                                                                                                                                                                                                                                                                                                       | hydrolase activity, acting on carbon-nitrogen (but not peptide) bonds, in linear amides                                 |
| GO:0016811 | HUMAN   HGNC=25490   UniProtKB=Q96HA8, HUMAN   HGNC=735   UniProtKB=Q13510<br>HUMAN   HGNC=333   UniProtKB=P01019, HUMAN   HGNC=43788   UniProtKB=Q8NHM4, HUMAN   HGNC=2300   UniProtKB=Q96IY4, HUMAN   HGNC=8824   UniProtKB=P36955, HUMAN   HGNC=19986   UniProtKB=P99999, HUMAN   HGNC=7900   UniProtKB=P55786, HUMAN   HGNC=8942   UniProtKB=P48595, HUMAN   HGNC=3658   UniProtKB=Q9UGM5, HUMAN   HGNC=6383   UniProtKB=P01042, HUMAN   HGNC=20675   UniProtKB=Q96KN2, HUMAN   HGNC=775   UniProtKB=P01008, HUMAN   HGNC=1228   UniProtKB=P05155, HUMAN   HGNC=9758   UniProtKB=P62820, HUMAN   HGNC=9075   UniProtKB=P08697, HUMAN   HGNC=11583   UniProtKB=P05543, HUMAN   HGNC=8583   UniProtKB=P05121, HUMAN   HGNC=9495   UniProtKB=P24158, HUMAN   HGNC=3311   UniProtKB=P30740, HUMAN   HGNC=8993   UniProtKB=P12273, HUMAN   HGNC=8948   UniProtKB=P29622, HUMAN   HGNC=1546   UniProtKB=P50454, HUMAN   HGNC=8941   UniProtKB=P01009, HUMAN   HGNC=1540   UniProtKB=P08185, HUMAN   HGNC=4798   UniProtKB=Q14520, HUMAN   HGNC=24437   UniProtKB=Q96KP4, HUMAN   HGNC=1050   UniProtKB=P55957, HUMAN   HGNC=10569   UniProtKB=P29508, HUMAN   HGNC=1476   UniProtKB=P07384, HUMAN   HGNC=4838   UniProtKB=P05546, HUMAN   HGNC=3309   UniProtKB=P08246, HUMAN   HGNC=15722   UniProtKB=Q8WXQ8, HUMAN   HGNC=19388   UniProtKB=P49593, HUMAN   HGNC=16   UniProtKB=P01011, HUMAN   HGNC=18173   UniProtKB=Q9NZ08, HUMAN   HGNC=18370   UniProtKB=Q9H0U4, HUMAN   HGNC=8955   UniProtKB=P50453 |                                                                                                                         |
| GO:0006508 |                                                                                                                                                                                                                                                                                                                                                                                                                                                                                                                                                                                                                                                                                                                                                                                                                                                                                                                                                                                                                                                                                                                                                                                                                                                                                                                                                                                                                                                                                                            | proteolysis                                                                                                             |
| GO:0006851 | HUMAN   HGNC=23526   UniProtKB=Q8NE86                                                                                                                                                                                                                                                                                                                                                                                                                                                                                                                                                                                                                                                                                                                                                                                                                                                                                                                                                                                                                                                                                                                                                                                                                                                                                                                                                                                                                                                                      | mitochondrial calcium ion transmembrane transport                                                                       |
| GO:0035195 | HUMAN   HGNC=29190   UniProtKB=Q9UPQ9, HUMAN   HGNC=20250   UniProtKB=Q96IF1                                                                                                                                                                                                                                                                                                                                                                                                                                                                                                                                                                                                                                                                                                                                                                                                                                                                                                                                                                                                                                                                                                                                                                                                                                                                                                                                                                                                                               | gene silencing by miRNA                                                                                                 |
| GO:0007004 | HUMAN   HGNC=5048   UniProtKB=Q00839                                                                                                                                                                                                                                                                                                                                                                                                                                                                                                                                                                                                                                                                                                                                                                                                                                                                                                                                                                                                                                                                                                                                                                                                                                                                                                                                                                                                                                                                       | telomere maintenance via telomerase                                                                                     |
| GO:0051091 | HUMAN   HGNC=30025   UniProtKB=Q5VV67                                                                                                                                                                                                                                                                                                                                                                                                                                                                                                                                                                                                                                                                                                                                                                                                                                                                                                                                                                                                                                                                                                                                                                                                                                                                                                                                                                                                                                                                      | positive regulation of DNA-binding transcription factor activity                                                        |

|            |                                                                                                                                                                                                                                                                                                                                                                                                                                                                                                                                                                                                                                                  |                                                                           |
|------------|--------------------------------------------------------------------------------------------------------------------------------------------------------------------------------------------------------------------------------------------------------------------------------------------------------------------------------------------------------------------------------------------------------------------------------------------------------------------------------------------------------------------------------------------------------------------------------------------------------------------------------------------------|---------------------------------------------------------------------------|
| GO:0007193 | HUMAN HGNC=237 UniProtKB=O43306                                                                                                                                                                                                                                                                                                                                                                                                                                                                                                                                                                                                                  | adenylate cyclase-inhibiting G protein-coupled receptor signaling pathway |
| GO:0048598 | HUMAN HGNC=12652 UniProtKB=P50552,HUMAN HGNC=10252 UniProtKB=O75116                                                                                                                                                                                                                                                                                                                                                                                                                                                                                                                                                                              | embryonic morphogenesis toll-like receptor 4 signaling pathway            |
| GO:0034142 | HUMAN HGNC=1628 UniProtKB=P08571<br>HUMAN HGNC=19985 UniProtKB=P53999,HUMAN HGNC=11957 UniProtKB=Q93074,HUMAN HGNC=7133 UniProtKB=O14686,HUMAN HGNC=17305 UniProtKB=Q9Y6J9,HUMAN HGNC=6207 UniProtKB=P14923,HUMAN HGNC=14451 UniProtKB=Q9BQK8,HUMAN HGNC=12738 UniProtKB=Q969T9,HUMAN HGNC=13726 UniProtKB=Q8NEZ4,HUMAN HGNC=16272 UniProtKB=Q96JK9                                                                                                                                                                                                                                                                                              | transcription coactivator activity                                        |
| GO:0032797 | HUMAN HGNC=30796 UniProtKB=Q9Y3F4<br>HUMAN HGNC=18756 UniProtKB=Q9BYZ6,HUMAN HGNC=9802 UniProtKB=P15153,HUMAN HGNC=9801 UniProtKB=P63000,HUMAN HGNC=533 UniProtKB=P04083                                                                                                                                                                                                                                                                                                                                                                                                                                                                         | SMN complex<br>regulation of cell shape                                   |
| GO:0008360 | HUMAN HGNC=1504 UniProtKB=P42574                                                                                                                                                                                                                                                                                                                                                                                                                                                                                                                                                                                                                 | erythrocyte differentiation                                               |
| GO:0030218 | HUMAN HGNC=15474 UniProtKB=Q9Y566,HUMAN HGNC=14294 UniProtKB=Q9BYB0                                                                                                                                                                                                                                                                                                                                                                                                                                                                                                                                                                              | regulation of synaptic plasticity                                         |
| GO:0048167 | HUMAN HGNC=453 UniProtKB=P02760,HUMAN HGNC=333 UniProtKB=P01019,HUMAN HGNC=8583 UniProtKB=P05121,HUMAN HGNC=3311 UniProtKB=P30740,HUMAN HGNC=8948 UniProtKB=P29622,HUMAN HGNC=11092 UniProtKB=P03973,HUMAN HGNC=1546 UniProtKB=P50454,HUMAN HGNC=8941 UniProtKB=P01009,HUMAN HGNC=1540 UniProtKB=P08185,HUMAN HGNC=8824 UniProtKB=P36955,HUMAN HGNC=8942 UniProtKB=P48595,HUMAN HGNC=10569 UniProtKB=P29508,HUMAN HGNC=4838 UniProtKB=P05546,HUMAN HGNC=16 UniProtKB=P01011,HUMAN HGNC=775 UniProtKB=P01008,HUMAN HGNC=1228 UniProtKB=P05155,HUMAN HGNC=9075 UniProtKB=P08697,HUMAN HGNC=11583 UniProtKB=P05543,HUMAN HGNC=8955 UniProtKB=P50453 | serine-type endopeptidase inhibitor activity                              |
| GO:0004867 | HUMAN HGNC=3579 UniProtKB=P16930                                                                                                                                                                                                                                                                                                                                                                                                                                                                                                                                                                                                                 | tyrosine metabolic process                                                |
| GO:0006570 | HUMAN HGNC=20250 UniProtKB=Q96IF1                                                                                                                                                                                                                                                                                                                                                                                                                                                                                                                                                                                                                | response to hypoxia                                                       |
| GO:0011666 | HUMAN HGNC=5461 UniProtKB=P78318                                                                                                                                                                                                                                                                                                                                                                                                                                                                                                                                                                                                                 | regulation of dephosphorylation                                           |
| GO:0035303 | HUMAN HGNC=11446 UniProtKB=O00186,HUMAN HGNC=11445 UniProtKB=Q15833,HUMAN HGNC=12644 UniProtKB=Q15836                                                                                                                                                                                                                                                                                                                                                                                                                                                                                                                                            | syntaxin-1 binding                                                        |
| GO:0017075 | HUMAN HGNC=6767 UniProtKB=Q15797                                                                                                                                                                                                                                                                                                                                                                                                                                                                                                                                                                                                                 | SMAD binding                                                              |
| GO:0046332 | HUMAN HGNC=3757 UniProtKB=O75955<br>HUMAN HGNC=18756 UniProtKB=Q9BYZ6,HUMAN HGNC=9801 UniProtKB=P63000,HUMAN HGNC=17905 UniProtKB=Q9Y613,HUMAN HGNC=2252 UniProtKB=P31146,HUMAN HGNC=26161 UniProtKB=P57737,HUMAN HGNC=12010 UniProtKB=P09493,HUMAN HGNC=12012 UniProtKB=P06753,HUMAN HGNC=9802 UniProtKB=P15153,HUMAN HGNC=12013 UniProtKB=P67936,HUMAN HGNC=12011 UniProtKB=P07951,HUMAN HGNC=15878 UniProtKB=                                                                                                                                                                                                                                 | regulation of cellular metabolic process<br>actin filament organization   |
| GO:0031323 |                                                                                                                                                                                                                                                                                                                                                                                                                                                                                                                                                                                                                                                  |                                                                           |
| GO:0007015 |                                                                                                                                                                                                                                                                                                                                                                                                                                                                                                                                                                                                                                                  |                                                                           |

|            |                                                                                                                                                                                                                                                                                                                                                                                                                                                                                                                                                                                                                                                                                                                                                                                                                                                                                                                                                                                                                                                                                                                                                                                                                                                                                                                                                                                                                                                                                                                  |                                         |
|------------|------------------------------------------------------------------------------------------------------------------------------------------------------------------------------------------------------------------------------------------------------------------------------------------------------------------------------------------------------------------------------------------------------------------------------------------------------------------------------------------------------------------------------------------------------------------------------------------------------------------------------------------------------------------------------------------------------------------------------------------------------------------------------------------------------------------------------------------------------------------------------------------------------------------------------------------------------------------------------------------------------------------------------------------------------------------------------------------------------------------------------------------------------------------------------------------------------------------------------------------------------------------------------------------------------------------------------------------------------------------------------------------------------------------------------------------------------------------------------------------------------------------|-----------------------------------------|
|            | =Q9NQ75,HUMAN HGNC=2254 UniProtKB=Q9ULV4,HUMAN HGNC=2253 UniProtKB=Q9BR76                                                                                                                                                                                                                                                                                                                                                                                                                                                                                                                                                                                                                                                                                                                                                                                                                                                                                                                                                                                                                                                                                                                                                                                                                                                                                                                                                                                                                                        |                                         |
| GO:0019731 | HUMAN HGNC=11092 UniProtKB=P03973,HUMAN HGNC=2761 UniProtKB=P59665,HUMAN HGNC=11740 UniProtKB=P02787<br>HUMAN HGNC=10432 UniProtKB=P51812,HUMAN HGNC=30410 UniProtKB=Q9BXA6,HUMAN HGNC=19388 UniProtKB=P49593,HUMAN HGNC=28164 UniProtKB=Q96M27,HUMAN HGNC=19825 UniProtKB=Q6SA08,HUMAN HGNC=29884 UniProtKB=Q8TF42,HUMAN HGNC=9386 UniProtKB=Q9UGJ0,HUMAN HGNC=18673 UniProtKB=Q96JB5,HUMAN HGNC=24224 UniProtKB=Q9NYV4,HUMAN HGNC=18994 UniProtKB=Q8TDC3,HUMAN HGNC=11766 UniProtKB=P01137                                                                                                                                                                                                                                                                                                                                                                                                                                                                                                                                                                                                                                                                                                                                                                                                                                                                                                                                                                                                                     | antibacterial humoral response          |
| GO:0006468 |                                                                                                                                                                                                                                                                                                                                                                                                                                                                                                                                                                                                                                                                                                                                                                                                                                                                                                                                                                                                                                                                                                                                                                                                                                                                                                                                                                                                                                                                                                                  | protein phosphorylation                 |
| GO:0005758 | HUMAN HGNC=19986 UniProtKB=P99999<br>HUMAN HGNC=26486 UniProtKB=Q6PJW8,HUMAN HGNC=2479 UniProtKB=O76096,HUMAN HGNC=4932 UniProtKB=P01889,HUMAN HGNC=10534 UniProtKB=Q9NR31,HUMAN HGNC=20250 UniProtKB=Q96IF1                                                                                                                                                                                                                                                                                                                                                                                                                                                                                                                                                                                                                                                                                                                                                                                                                                                                                                                                                                                                                                                                                                                                                                                                                                                                                                     | mitochondrial intermembrane space       |
| GO:0048522 |                                                                                                                                                                                                                                                                                                                                                                                                                                                                                                                                                                                                                                                                                                                                                                                                                                                                                                                                                                                                                                                                                                                                                                                                                                                                                                                                                                                                                                                                                                                  | positive regulation of cellular process |
| GO:0071108 | HUMAN HGNC=23077 UniProtKB=Q96FW1,HUMAN HGNC=25648 UniProtKB=Q8N5J2                                                                                                                                                                                                                                                                                                                                                                                                                                                                                                                                                                                                                                                                                                                                                                                                                                                                                                                                                                                                                                                                                                                                                                                                                                                                                                                                                                                                                                              | protein K48-linked deubiquitination     |
| GO:0030971 | HUMAN HGNC=10840 UniProtKB=P29353                                                                                                                                                                                                                                                                                                                                                                                                                                                                                                                                                                                                                                                                                                                                                                                                                                                                                                                                                                                                                                                                                                                                                                                                                                                                                                                                                                                                                                                                                | receptor tyrosine kinase binding        |
| GO:0008333 | HUMAN HGNC=25153 UniProtKB=Q96EY5,HUMAN HGNC=9788 UniProtKB=P51149                                                                                                                                                                                                                                                                                                                                                                                                                                                                                                                                                                                                                                                                                                                                                                                                                                                                                                                                                                                                                                                                                                                                                                                                                                                                                                                                                                                                                                               | endosome to lysosome transport          |
| GO:0060170 |                                                                                                                                                                                                                                                                                                                                                                                                                                                                                                                                                                                                                                                                                                                                                                                                                                                                                                                                                                                                                                                                                                                                                                                                                                                                                                                                                                                                                                                                                                                  | ciliary membrane                        |
| PC00198    | HUMAN HGNC=19747 UniProtKB=Q86UK5<br>HUMAN HGNC=24056 UniProtKB=Q8NHP1,HUMAN HGNC=1063 UniProtKB=P30043,HUMAN HGNC=1548 UniProtKB=P16152,HUMAN HGNC=5006 UniProtKB=P04035,HUMAN HGNC=2873 UniProtKB=P00387,HUMAN HGNC=7377 UniProtKB=Q9UJ68,HUMAN HGNC=13397 UniProtKB=Q9UHQ9,HUMAN HGNC=4376 UniProtKB=P36959,HUMAN HGNC=12582 UniProtKB=P14927,HUMAN HGNC=12590 UniProtKB=P07919,HUMAN HGNC=4623 UniProtKB=P00390,HUMAN HGNC=18985 UniProtKB=Q7Z4W1,HUMAN HGNC=380 UniProtKB=P14550<br>HUMAN HGNC=5575 UniProtKB=A0A0B4J1V2,HUMAN HGNC=5645 UniProtKB=A0A0C4DH34,HUMAN HGNC=4932 UniProtKB=P01889,HUMAN HGNC=5549 UniProtKB=A0A0C4DH31,HUMAN HGNC=5554 UniProtKB=P01743,HUMAN HGNC=5480 UniProtKB=P01880,HUMAN HGNC=5659 UniProtKB=A0A0C4DH38,HUMAN HGNC=5634 UniProtKB=A0A075B7F0,HUMAN HGNC=38476 UniProtKB=B9A064,HUMAN HGNC=5861 UniProtKB=A0M8Q6,HUMAN HGNC=5647 UniProtKB=A0A087WSY4,HUMAN HGNC=5563 UniProtKB=A0A075B7D0,HUMAN HGNC=5856 UniProtKB=P0DOY2,HUMAN HGNC=5606 UniProtKB=P01763,HUMAN HGNC=199 UniProtKB=O43506,HUMAN HGNC=5576 UniProtKB=P01817,HUMAN HGNC=5528 UniProtKB=P01861,HUMAN HGNC=5541 UniProtKB=P01871,HUMAN HGNC=4244 UniProtKB=O00451,HUMAN HGNC=5585 UniProtKB=A0A0C4DH32,HUMAN HGNC=4243 UniProtKB=P56159,HUMAN HGNC=5551 UniProtKB=A0A0C4DH33,HUMAN HGNC=5526 UniProtKB=P01859,HUMAN HGNC=1628 UniProtKB=P08571,HUMAN HGNC=5657 UniProtKB=PODP08,HUMAN Ensembl=ENSG00000282639 UniProtKB=A0A0J9YX35,HUMAN Gene=HV309_HUMAN UniProtKB=P01782,HUMAN HGNC=5654 UniProtKB=P0182 | reductase                               |
| GO:0009897 |                                                                                                                                                                                                                                                                                                                                                                                                                                                                                                                                                                                                                                                                                                                                                                                                                                                                                                                                                                                                                                                                                                                                                                                                                                                                                                                                                                                                                                                                                                                  | external side of plasma membrane        |

|            |                                                                                                                                                                                                                                                                                                                                                                                                                                                                                                                                                                                                                                                                                                                                                                                                                                                                                                                                                                                                                                                                                                                                                                                                                                                                                                                              |                                                                                                    |
|------------|------------------------------------------------------------------------------------------------------------------------------------------------------------------------------------------------------------------------------------------------------------------------------------------------------------------------------------------------------------------------------------------------------------------------------------------------------------------------------------------------------------------------------------------------------------------------------------------------------------------------------------------------------------------------------------------------------------------------------------------------------------------------------------------------------------------------------------------------------------------------------------------------------------------------------------------------------------------------------------------------------------------------------------------------------------------------------------------------------------------------------------------------------------------------------------------------------------------------------------------------------------------------------------------------------------------------------|----------------------------------------------------------------------------------------------------|
|            | 5,HUMAN HGNC=5553 UniProtKB=A0A0A0MS14,HUMAN HGNC=19100 UniProtKB=Q5VWK5,HUMAN Gene=HV108_HUMAN UniProtKB=P0DP01,HUMAN HGNC=5624 UniProtKB=A0A0B4J1X5,HUMAN HGNC=5620 UniProtKB=P01780,HUMAN HGNC=5598 UniProtKB=A0A0C4DH35,HUMAN HGNC=11763 UniProtKB=P02786,HUMAN HGNC=5580 UniProtKB=P01762,HUMAN HGNC=5633 UniProtKB=A0A075B7D8,HUMAN HGNC=5582 UniProtKB=A0A0B4J1V0,HUMAN HGNC=5478 UniProtKB=P01876,HUMAN HGNC=5617 UniProtKB=A0A075B6Q5,HUMAN HGNC=910 UniProtKB=P25311,HUMAN HGNC=5594 UniProtKB=P0DP03,HUMAN HGNC=5655 UniProtKB=A0A0C4DH41,HUMAN HGNC=5636 UniProtKB=A0A075B7B8,HUMAN HGNC=5586 UniProtKB=A0A0B4J1V1,HUMAN HGNC=5581 UniProtKB=P01766,HUMAN HGNC=5622 UniProtKB=A0A0B4J1Y9,HUMAN HGNC=5652 UniProtKB=A0A075B6R2,HUMAN HGNC=5593 UniProtKB=P0DP02,HUMAN HGNC=5479 UniProtKB=P01877,HUMAN HGNC=5619 UniProtKB=A0A0C4DH42,HUMAN HGNC=5596 UniProtKB=P01772,HUMAN HGNC=5550 UniProtKB=P23083,HUMAN HGNC=5604 UniProtKB=A0A0B4J1X8,HUMAN HGNC=5525 UniProtKB=P01857,HUMAN HGNC=5662 UniProtKB=A0A0B4J1U7,HUMAN HGNC=16961 UniProtKB=Q15762,HUMAN HGNC=5601 UniProtKB=A0A0C4DH36,HUMAN HGNC=5716 UniProtKB=P01834,HUMAN HGNC=5588 UniProtKB=P01764,HUMAN HGNC=5857 UniProtKB=P0DOY3,HUMAN HGNC=5610 UniProtKB=P01767,HUMAN Ensembl=ENSG00000282150 UniProtKB=A0A0J9YY99,HUMAN HGNC=5527 UniProtKB=P01860 |                                                                                                    |
| GO:0097650 | HUMAN HGNC=8898 UniProtKB=P07205                                                                                                                                                                                                                                                                                                                                                                                                                                                                                                                                                                                                                                                                                                                                                                                                                                                                                                                                                                                                                                                                                                                                                                                                                                                                                             | B axonemal microtubule                                                                             |
| GO:0051225 | HUMAN HGNC=6891 UniProtKB=Q15555,HUMAN HGNC=6890 UniProtKB=Q15691                                                                                                                                                                                                                                                                                                                                                                                                                                                                                                                                                                                                                                                                                                                                                                                                                                                                                                                                                                                                                                                                                                                                                                                                                                                            | spindle assembly                                                                                   |
| GO:0005622 | HUMAN HGNC=9391 UniProtKB=P13861,HUMAN HGNC=9392 UniProtKB=P31323                                                                                                                                                                                                                                                                                                                                                                                                                                                                                                                                                                                                                                                                                                                                                                                                                                                                                                                                                                                                                                                                                                                                                                                                                                                            | intracellular                                                                                      |
| PC00260    | HUMAN HGNC=10432 UniProtKB=P51812,HUMAN HGNC=30178 UniProtKB=Q9Y570,HUMAN HGNC=8575 UniProtKB=P68402,HUMAN HGNC=8127 UniProtKB=O15294                                                                                                                                                                                                                                                                                                                                                                                                                                                                                                                                                                                                                                                                                                                                                                                                                                                                                                                                                                                                                                                                                                                                                                                        | protein modifying enzyme                                                                           |
| GO:0007179 | HUMAN HGNC=6767 UniProtKB=Q15797,HUMAN HGNC=23688 UniProtKB=Q86UU0,HUMAN HGNC=13200 UniProtKB=Q15942,HUMAN HGNC=11766 UniProtKB=P01137                                                                                                                                                                                                                                                                                                                                                                                                                                                                                                                                                                                                                                                                                                                                                                                                                                                                                                                                                                                                                                                                                                                                                                                       | transforming growth factor<br>beta receptor signaling<br>pathway<br>mRNA polyadenylation<br>factor |
| PC00146    | HUMAN HGNC=9207 UniProtKB=Q9UFF9                                                                                                                                                                                                                                                                                                                                                                                                                                                                                                                                                                                                                                                                                                                                                                                                                                                                                                                                                                                                                                                                                                                                                                                                                                                                                             |                                                                                                    |
| GO:1901888 | HUMAN HGNC=3757 UniProtKB=O75955,HUMAN HGNC=10252 UniProtKB=O75116                                                                                                                                                                                                                                                                                                                                                                                                                                                                                                                                                                                                                                                                                                                                                                                                                                                                                                                                                                                                                                                                                                                                                                                                                                                           | regulation of cell junction<br>assembly                                                            |
| GO:0045582 | HUMAN HGNC=533 UniProtKB=P04083                                                                                                                                                                                                                                                                                                                                                                                                                                                                                                                                                                                                                                                                                                                                                                                                                                                                                                                                                                                                                                                                                                                                                                                                                                                                                              | positive regulation of T cell<br>differentiation                                                   |
| GO:0071417 | HUMAN HGNC=26068 UniProtKB=Q6IAA8,HUMAN HGNC=9855 UniProtKB=P62834,HUMAN HGNC=17955 UniProtKB=O43504,HUMAN HGNC=9857 UniProtKB=P61224,HUMAN HGNC=15606 UniProtKB=Q9UHA4                                                                                                                                                                                                                                                                                                                                                                                                                                                                                                                                                                                                                                                                                                                                                                                                                                                                                                                                                                                                                                                                                                                                                      | cellular response to<br>organonitrogen compound<br>regulation of                                   |
| GO:0060255 | HUMAN HGNC=3757 UniProtKB=O75955                                                                                                                                                                                                                                                                                                                                                                                                                                                                                                                                                                                                                                                                                                                                                                                                                                                                                                                                                                                                                                                                                                                                                                                                                                                                                             | macromolecule metabolic<br>process                                                                 |
| GO:0016051 | HUMAN HGNC=8898 UniProtKB=P07205,HUMAN HGNC=4458 UniProtKB=P06744,HUMAN HGNC=12009 UniProtKB=P60174                                                                                                                                                                                                                                                                                                                                                                                                                                                                                                                                                                                                                                                                                                                                                                                                                                                                                                                                                                                                                                                                                                                                                                                                                          | carbohydrate biosynthetic<br>process                                                               |
| GO:0051336 | HUMAN HGNC=8087 UniProtKB=P29728                                                                                                                                                                                                                                                                                                                                                                                                                                                                                                                                                                                                                                                                                                                                                                                                                                                                                                                                                                                                                                                                                                                                                                                                                                                                                             | regulation of hydrolase<br>activity                                                                |

|           |                                                                                                                                                                                                                                                                                                                                                                                                                                                                                                                                                                                                                                                                                                                                                                                                                                                                                                                                                                                                                                                                                                                                                                                                    |                                                          |
|-----------|----------------------------------------------------------------------------------------------------------------------------------------------------------------------------------------------------------------------------------------------------------------------------------------------------------------------------------------------------------------------------------------------------------------------------------------------------------------------------------------------------------------------------------------------------------------------------------------------------------------------------------------------------------------------------------------------------------------------------------------------------------------------------------------------------------------------------------------------------------------------------------------------------------------------------------------------------------------------------------------------------------------------------------------------------------------------------------------------------------------------------------------------------------------------------------------------------|----------------------------------------------------------|
| GO:190253 |                                                                                                                                                                                                                                                                                                                                                                                                                                                                                                                                                                                                                                                                                                                                                                                                                                                                                                                                                                                                                                                                                                                                                                                                    | positive regulation of intracellular signal transduction |
| 3         | HUMAN HGNC=1050 UniProtKB=P55957                                                                                                                                                                                                                                                                                                                                                                                                                                                                                                                                                                                                                                                                                                                                                                                                                                                                                                                                                                                                                                                                                                                                                                   |                                                          |
| GO:003049 |                                                                                                                                                                                                                                                                                                                                                                                                                                                                                                                                                                                                                                                                                                                                                                                                                                                                                                                                                                                                                                                                                                                                                                                                    |                                                          |
| 0         | HUMAN HGNC=12755 UniProtKB=Q9UNX4                                                                                                                                                                                                                                                                                                                                                                                                                                                                                                                                                                                                                                                                                                                                                                                                                                                                                                                                                                                                                                                                                                                                                                  | maturation of SSU-rRNA                                   |
|           | HUMAN HGNC=4624 UniProtKB=P48637,HUMAN HGNC=7900 UniProtKB=P55786,HUMAN HGNC=3537 UniProtKB=P25116,HUMAN HGNC=18173 UniProtKB=Q9NZ08                                                                                                                                                                                                                                                                                                                                                                                                                                                                                                                                                                                                                                                                                                                                                                                                                                                                                                                                                                                                                                                               |                                                          |
| GO:004227 |                                                                                                                                                                                                                                                                                                                                                                                                                                                                                                                                                                                                                                                                                                                                                                                                                                                                                                                                                                                                                                                                                                                                                                                                    | peptide binding                                          |
| 7         |                                                                                                                                                                                                                                                                                                                                                                                                                                                                                                                                                                                                                                                                                                                                                                                                                                                                                                                                                                                                                                                                                                                                                                                                    |                                                          |
| GO:003158 |                                                                                                                                                                                                                                                                                                                                                                                                                                                                                                                                                                                                                                                                                                                                                                                                                                                                                                                                                                                                                                                                                                                                                                                                    |                                                          |
| 9         | HUMAN HGNC=12726 UniProtKB=P04275                                                                                                                                                                                                                                                                                                                                                                                                                                                                                                                                                                                                                                                                                                                                                                                                                                                                                                                                                                                                                                                                                                                                                                  | cell-substrate adhesion                                  |
| GO:004425 | HUMAN HGNC=253 UniProtKB=P11766,HUMAN HGNC=251 UniProtKB=P00326,HUMAN HGNC=255 UniProtKB=P28332                                                                                                                                                                                                                                                                                                                                                                                                                                                                                                                                                                                                                                                                                                                                                                                                                                                                                                                                                                                                                                                                                                    | cellular lipid metabolic process                         |
| 5         |                                                                                                                                                                                                                                                                                                                                                                                                                                                                                                                                                                                                                                                                                                                                                                                                                                                                                                                                                                                                                                                                                                                                                                                                    |                                                          |
| GO:004329 |                                                                                                                                                                                                                                                                                                                                                                                                                                                                                                                                                                                                                                                                                                                                                                                                                                                                                                                                                                                                                                                                                                                                                                                                    |                                                          |
| 6         | HUMAN HGNC=16051 UniProtKB=Q8TEW0                                                                                                                                                                                                                                                                                                                                                                                                                                                                                                                                                                                                                                                                                                                                                                                                                                                                                                                                                                                                                                                                                                                                                                  | apical junction complex                                  |
| GO:000012 | HUMAN HGNC=25473 UniProtKB=Q9P2N6,HUMAN HGNC=25544 UniProtKB=Q9HCI7                                                                                                                                                                                                                                                                                                                                                                                                                                                                                                                                                                                                                                                                                                                                                                                                                                                                                                                                                                                                                                                                                                                                | histone acetyltransferase complex                        |
| 3         |                                                                                                                                                                                                                                                                                                                                                                                                                                                                                                                                                                                                                                                                                                                                                                                                                                                                                                                                                                                                                                                                                                                                                                                                    |                                                          |
| GO:003020 | HUMAN HGNC=24293 UniProtKB=Q70JA7,HUMAN HGNC=18144 UniProtKB=Q8IZU8                                                                                                                                                                                                                                                                                                                                                                                                                                                                                                                                                                                                                                                                                                                                                                                                                                                                                                                                                                                                                                                                                                                                | chondroitin sulfate metabolic process                    |
| 4         |                                                                                                                                                                                                                                                                                                                                                                                                                                                                                                                                                                                                                                                                                                                                                                                                                                                                                                                                                                                                                                                                                                                                                                                                    |                                                          |
|           | HUMAN HGNC=6169 UniProtKB=Q14624,HUMAN HGNC=333 UniProtKB=P01019,HUMAN HGNC=11092 UniProtKB=P03973,HUMAN HGNC=2482 UniProtKB=P04080,HUMAN HGNC=8824 UniProtKB=P36955,HUMAN HGNC=8630 UniProtKB=P30086,HUMAN HGNC=620 UniProtKB=P05067,HUMAN HGNC=8942 UniProtKB=P48595,HUMAN HGNC=3658 UniProtKB=Q9UGM5,HUMAN HGNC=11820 UniProtKB=P01033,HUMAN HGNC=6383 UniProtKB=P01042,HUMAN HGNC=6167 UniProtKB=P19823,HUMAN HGNC=775 UniProtKB=P01008,HUMAN HGNC=1228 UniProtKB=P05155,HUMAN HGNC=9075 UniProtKB=P08697,HUMAN HGNC=21449 UniProtKB=Q86UX2,HUMAN HGNC=1324 UniProtKB=P0C0L5,HUMAN HGNC=1318 UniProtKB=P01024,HUMAN HGNC=21685 UniProtKB=Q6YHK3,HUMAN HGNC=11583 UniProtKB=P05543,HUMAN HGNC=1331 UniProtKB=P01031,HUMAN HGNC=8583 UniProtKB=P05121,HUMAN HGNC=3311 UniProtKB=P30740,HUMAN HGNC=8948 UniProtKB=P29622,HUMAN HGNC=9750 UniProtKB=P20742,HUMAN HGNC=1546 UniProtKB=P50454,HUMAN HGNC=598 UniProtKB=Q06481,HUMAN HGNC=8941 UniProtKB=P01009,HUMAN HGNC=1540 UniProtKB=P08185,HUMAN HGNC=10569 UniProtKB=P29508,HUMAN HGNC=4838 UniProtKB=P05546,HUMAN HGNC=6168 UniProtKB=Q06033,HUMAN HGNC=9571 UniProtKB=Q92530,HUMAN HGNC=16 UniProtKB=P01011,HUMAN HGNC=8955 UniProtKB=P50453 |                                                          |
| PC00191   | HUMAN HGNC=586 UniProtKB=P13798,HUMAN HGNC=1247 UniProtKB=P09871,HUMAN HGNC=43788 UniProtKB=Q8NHM4,HUMAN HGNC=2532 UniProtKB=P08311,HUMAN HGNC=3528 UniProtKB=P00742,HUMAN HGNC=5156 UniProtKB=P00739,HUMAN HGNC=6902 UniProtKB=O00187,HUMAN HGNC=3551 UniProtKB=P00740,HUMAN HGNC=9451 UniProtKB=P04070,HUMAN HGNC=9495 UniProtKB=P24158,HUMAN HGNC=7380 UniProtKB=P26927,HUMAN HGNC=9469 UniProtKB=O14668,HUMAN HGNC=8569 UniProtKB=P29122,HUMAN HGNC=913 UniProtKB=P20160,HUMAN HGNC=12016 UniProtKB=P29144,HUMAN HGNC=3465 UniProtKB=P10768,HUMAN HGNC=8738 UniProtKB=Q15113,HUMAN HGNC=4798 UniProtKB=Q14520,HUMAN HGNC=3530 UniProtKB=P00748,HUMAN HGNC=5141 UniProtKB=P00738,HUMAN HGNC=3309                                                                                                                                                                                                                                                                                                                                                                                                                                                                                                | protease inhibitor                                       |
| PC00203   |                                                                                                                                                                                                                                                                                                                                                                                                                                                                                                                                                                                                                                                                                                                                                                                                                                                                                                                                                                                                                                                                                                                                                                                                    | serine protease                                          |

|            |                                                                                                                                                                                                                                                                                                                                                                                                                            |                                                   |
|------------|----------------------------------------------------------------------------------------------------------------------------------------------------------------------------------------------------------------------------------------------------------------------------------------------------------------------------------------------------------------------------------------------------------------------------|---------------------------------------------------|
|            | UniProtKB=P08246,HUMAN   HGNC=21265   UniProtKB=Q9NZP8,HUMAN   HGNC=13921   UniProtKB=O95870,HUMAN   HGNC=6901   UniProtKB=P48740,HUMAN   HGNC=9071   UniProtKB=P00747                                                                                                                                                                                                                                                     |                                                   |
| GO:0010824 | HUMAN   HGNC=7910   UniProtKB=P06748                                                                                                                                                                                                                                                                                                                                                                                       | regulation of centrosome duplication              |
| GO:0045727 | HUMAN   HGNC=3300   UniProtKB=P63241,HUMAN   HGNC=1243   UniProtKB=Q07021,HUMAN   Gene=EIF2S3L   UniProtKB=Q2VIR3 HUMAN   HGNC=1459   UniProtKB=Q14012,HUMAN   HGNC=9414   UniProtKB=Q13976,HUMAN   HGNC=9406   UniProtKB=Q16513,HUMAN   HGNC=9380   UniProtKB=P17612,HUMAN   HGNC=12401   UniProtKB=P33981,HUMAN   HGNC=9381   UniProtKB=P22694,HUMAN   HGNC=9395   UniProtKB=P05771,HUMAN   HGNC=1745   UniProtKB=O00311 | positive regulation of translation                |
| GO:0018105 |                                                                                                                                                                                                                                                                                                                                                                                                                            | peptidyl-serine phosphorylation                   |
| GO:0030660 | HUMAN   HGNC=25951   UniProtKB=Q6ULP2,HUMAN   HGNC=555   UniProtKB=O43747                                                                                                                                                                                                                                                                                                                                                  | Golgi-associated vesicle membrane                 |
| GO:0051897 | HUMAN   HGNC=6091   UniProtKB=P06213                                                                                                                                                                                                                                                                                                                                                                                       | positive regulation of protein kinase B signaling |
| GO:0042274 | HUMAN   HGNC=7910   UniProtKB=P06748                                                                                                                                                                                                                                                                                                                                                                                       | ribosomal small subunit biogenesis                |
| GO:0051233 | HUMAN   HGNC=6891   UniProtKB=Q15555,HUMAN   HGNC=6890   UniProtKB=Q15691                                                                                                                                                                                                                                                                                                                                                  | spindle midzone                                   |
| GO:0099536 | HUMAN   HGNC=20589   UniProtKB=Q9P0J7                                                                                                                                                                                                                                                                                                                                                                                      | synaptic signaling                                |
| GO:0003714 | HUMAN   HGNC=30747   UniProtKB=P61201,HUMAN   HGNC=5270   UniProtKB=P25685,HUMAN   HGNC=5048   UniProtKB=Q00839,HUMAN   HGNC=20250   UniProtKB=Q96IF1 HUMAN   HGNC=19985   UniProtKB=P53999,HUMAN   HGNC=11957   UniProtKB=Q93074,HUMAN   HGNC=11617   UniProtKB=Q15369,HUMAN   HGNC=23074   UniProtKB=Q9NX70,HUMAN   HGNC=17305   UniProtKB=Q9Y6J9,HUMAN   HGNC=11619   UniProtKB=Q15370                                  | transcription corepressor activity                |
| PC00259    |                                                                                                                                                                                                                                                                                                                                                                                                                            | general transcription factor                      |
| GO:0060236 | HUMAN   HGNC=5048   UniProtKB=Q00839                                                                                                                                                                                                                                                                                                                                                                                       | regulation of mitotic spindle organization        |
| GO:0000963 | HUMAN   HGNC=26022   UniProtKB=Q7L0Y3                                                                                                                                                                                                                                                                                                                                                                                      | mitochondrial RNA processing                      |
| GO:0036157 | HUMAN   HGNC=8898   UniProtKB=P07205,HUMAN   HGNC=2952   UniProtKB=Q96JB1                                                                                                                                                                                                                                                                                                                                                  | outer dynein arm                                  |
| GO:0006783 | HUMAN   HGNC=871   UniProtKB=Q9UII2,HUMAN   HGNC=395   UniProtKB=P13716                                                                                                                                                                                                                                                                                                                                                    | heme biosynthetic process                         |
| GO:0017156 | HUMAN   HGNC=11510   UniProtKB=Q8N9I0,HUMAN   HGNC=11512   UniProtKB=Q9H2B2                                                                                                                                                                                                                                                                                                                                                | calcium-ion regulated exocytosis                  |
| GO:0005104 | HUMAN   HGNC=15527   UniProtKB=Q86Z14                                                                                                                                                                                                                                                                                                                                                                                      | fibroblast growth factor receptor binding         |
| GO:0008201 | HUMAN   HGNC=2209   UniProtKB=P20908,HUMAN   HGNC=11085   UniProtKB=O75093                                                                                                                                                                                                                                                                                                                                                 | heparin binding                                   |
| GO:0002696 | HUMAN   HGNC=6517   UniProtKB=P18428,HUMAN   HGNC=16961   UniProtKB=Q15762                                                                                                                                                                                                                                                                                                                                                 | positive regulation of leukocyte activation       |
| GO:0005518 | HUMAN   HGNC=6153   UniProtKB=P05556,HUMAN   HGNC=11219   UniProtKB=P09486                                                                                                                                                                                                                                                                                                                                                 | collagen binding                                  |
| GO:0071011 | HUMAN   HGNC=20471   UniProtKB=Q95777,HUMAN   HGNC=6038   UniProtKB=Q12906                                                                                                                                                                                                                                                                                                                                                 | precatalytic spliceosome                          |
| GO:0022839 | HUMAN   HGNC=22222   UniProtKB=Q9C0H2                                                                                                                                                                                                                                                                                                                                                                                      | ion gated channel activity                        |
| GO:0042981 | HUMAN   HGNC=6766   UniProtKB=Q8WXG6,HUMAN   HGNC=7850   UniProtKB=P22392                                                                                                                                                                                                                                                                                                                                                  | regulation of apoptotic process                   |

|            |                                                                                                                                                                                                                                                                                                                                                                                                                                                                                                                                                                                                                                                               |                                                                       |
|------------|---------------------------------------------------------------------------------------------------------------------------------------------------------------------------------------------------------------------------------------------------------------------------------------------------------------------------------------------------------------------------------------------------------------------------------------------------------------------------------------------------------------------------------------------------------------------------------------------------------------------------------------------------------------|-----------------------------------------------------------------------|
| GO:001062  |                                                                                                                                                                                                                                                                                                                                                                                                                                                                                                                                                                                                                                                               | positive regulation of gene expression                                |
| 8          | HUMAN HGNC=27424 UniProtKB=Q5T481                                                                                                                                                                                                                                                                                                                                                                                                                                                                                                                                                                                                                             |                                                                       |
| GO:0005272 | HUMAN HGNC=10594 UniProtKB=Q01118,HUMAN HGNC=10582 UniProtKB=Q9Y5Y9                                                                                                                                                                                                                                                                                                                                                                                                                                                                                                                                                                                           | sodium channel activity                                               |
| GO:0010518 | HUMAN HGNC=4381 UniProtKB=Q14344                                                                                                                                                                                                                                                                                                                                                                                                                                                                                                                                                                                                                              | positive regulation of phospholipase activity                         |
|            | HUMAN HGNC=9786 UniProtKB=P20340,HUMAN HGNC=2230 UniProtKB=P53621,HUMAN HGNC=14902 UniProtKB=Q9NRW1,HUMAN HGNC=649 UniProtKB=P48444,HUMAN HGNC=2232 UniProtKB=P35606                                                                                                                                                                                                                                                                                                                                                                                                                                                                                          | retrograde vesicle-mediated transport, Golgi to endoplasmic reticulum |
| GO:0006890 |                                                                                                                                                                                                                                                                                                                                                                                                                                                                                                                                                                                                                                                               | urogenital system development                                         |
| GO:0001655 | HUMAN HGNC=533 UniProtKB=P04083                                                                                                                                                                                                                                                                                                                                                                                                                                                                                                                                                                                                                               |                                                                       |
|            | HUMAN HGNC=3616 UniProtKB=P12318,HUMAN HGNC=5 UniProtKB=P04217,HUMAN HGNC=8823 UniProtKB=P16284,HUMAN HGNC=3611 UniProtKB=P30273,HUMAN HGNC=8968 UniProtKB=P01833,HUMAN HGNC=1704 UniProtKB=Q9UIB8,HUMAN HGNC=14388 UniProtKB=Q9HCN6,HUMAN HGNC=20434 UniProtKB=Q86YW5                                                                                                                                                                                                                                                                                                                                                                                        | immunoglobulin receptor superfamily                                   |
| PC00124    | HUMAN HGNC=12407 UniProtKB=P68366,HUMAN HGNC=2712 UniProtKB=Q13561,HUMAN HGNC=12410 UniProtKB=Q9NY65,HUMAN HGNC=12666 UniProtKB=P55072,HUMAN HGNC=20778 UniProtKB=P07437,HUMAN HGNC=28959 UniProtKB=Q14008,HUMAN HGNC=533 UniProtKB=P04083,HUMAN HGNC=20766 UniProtKB=Q71U36,HUMAN HGNC=20774 UniProtKB=P04350,HUMAN HGNC=18673 UniProtKB=Q96JB5,HUMAN HGNC=20771 UniProtKB=P68371,HUMAN HGNC=20063 UniProtKB=Q86T82,HUMAN HGNC=10252 UniProtKB=O75116,HUMAN HGNC=9847 UniProtKB=P43487,HUMAN HGNC=9308 UniProtKB=Q15257,HUMAN HGNC=16257 UniProtKB=Q9H4B7,HUMAN HGNC=9568 UniProtKB=Q06323,HUMAN HGNC=7547 UniProtKB=P10243,HUMAN HGNC=2092 UniProtKB=Q00610 | mitotic nuclear division                                              |
| GO:0140014 |                                                                                                                                                                                                                                                                                                                                                                                                                                                                                                                                                                                                                                                               |                                                                       |
| GO:0017016 | HUMAN HGNC=9847 UniProtKB=P43487                                                                                                                                                                                                                                                                                                                                                                                                                                                                                                                                                                                                                              | Ras GTPase binding                                                    |
| GO:0038202 | HUMAN HGNC=17955 UniProtKB=O43504                                                                                                                                                                                                                                                                                                                                                                                                                                                                                                                                                                                                                             | TORC1 signaling                                                       |
|            | HUMAN HGNC=31797 UniProtKB=P0C7V6,HUMAN HGNC=7106 UniProtKB=P54252,HUMAN HGNC=10760 UniProtKB=Q01105,HUMAN HGNC=7640 UniProtKB=Q99733,HUMAN HGNC=1859 UniProtKB=Q9BV73,HUMAN HGNC=42937 UniProtKB=P0DME0,HUMAN HGNC=24358 UniProtKB=Q9H2G4                                                                                                                                                                                                                                                                                                                                                                                                                    | chromatin/chromatin-binding, or -regulatory protein                   |
| PC00077    |                                                                                                                                                                                                                                                                                                                                                                                                                                                                                                                                                                                                                                                               |                                                                       |
| GO:0050661 | HUMAN HGNC=7863 UniProtKB=Q13423,HUMAN HGNC=8891 UniProtKB=P52209                                                                                                                                                                                                                                                                                                                                                                                                                                                                                                                                                                                             | NADP binding                                                          |
|            | HUMAN HGNC=5269 UniProtKB=P61604,HUMAN HGNC=5261 UniProtKB=P10809,HUMAN HGNC=10519 UniProtKB=Q9NZJ4,HUMAN HGNC=4926 UniProtKB=O15212,HUMAN HGNC=1735 UniProtKB=Q16543,HUMAN HGNC=5270 UniProtKB=P25685                                                                                                                                                                                                                                                                                                                                                                                                                                                        | chaperone binding                                                     |
| GO:0051087 |                                                                                                                                                                                                                                                                                                                                                                                                                                                                                                                                                                                                                                                               | fatty acid biosynthetic process                                       |
| GO:0006633 | HUMAN HGNC=24175 UniProtKB=Q9P035                                                                                                                                                                                                                                                                                                                                                                                                                                                                                                                                                                                                                             |                                                                       |
| GO:0005765 | HUMAN HGNC=6499 UniProtKB=P11279,HUMAN HGNC=6501 UniProtKB=P13473,HUMAN HGNC=25564 UniProtKB=Q9NVJ2                                                                                                                                                                                                                                                                                                                                                                                                                                                                                                                                                           | lysosomal membrane                                                    |
| GO:0030162 | HUMAN HGNC=7732 UniProtKB=Q15843                                                                                                                                                                                                                                                                                                                                                                                                                                                                                                                                                                                                                              | regulation of proteolysis                                             |
| GO:0006334 | HUMAN HGNC=4747 UniProtKB=P58876,HUMAN HGNC=4750 UniProtKB=Q99879,HUMAN HGNC=13954 UniProtKB=O60814,HUMAN HGNC=13954 UniProtKB=O60814,HUMAN HGNC=13954 UniProtKB=O60814                                                                                                                                                                                                                                                                                                                                                                                                                                                                                       | nucleosome assembly                                                   |

|            |                                                                                                                                                                                                                                                                                                                |                                               |
|------------|----------------------------------------------------------------------------------------------------------------------------------------------------------------------------------------------------------------------------------------------------------------------------------------------------------------|-----------------------------------------------|
|            | MAN HGNC=4762 UniProtKB=P57053,HUMAN HGNC=4746 UniProtKB=P62807,HUMAN HGNC=20514 UniProtKB=Q8N257,HUMAN HGNC=4755 UniProtKB=Q93079,HUMAN HGNC=7640 UniProtKB=Q99733,HUMAN HGNC=24700 UniProtKB=Q5QNW6,HUMAN HGNC=4749 UniProtKB=Q99877                                                                         |                                               |
| GO:0002250 | HUMAN HGNC=6171 UniProtKB=Q08881,HUMAN HGNC=11491 UniProtKB=P43405                                                                                                                                                                                                                                             | adaptive immune response                      |
| GO:0046777 | HUMAN HGNC=6171 UniProtKB=Q08881,HUMAN HGNC=4037 UniProtKB=P06241,HUMAN HGNC=12841 UniProtKB=P07947,HUMAN HGNC=11283 UniProtKB=P12931,HUMAN HGNC=6735 UniProtKB=P07948                                                                                                                                         | protein autophosphorylation                   |
| GO:0031201 | HUMAN HGNC=11442 UniProtKB=O15400,HUMAN HGNC=7641 UniProtKB=P54920,HUMAN HGNC=11429 UniProtKB=O75558,HUMAN HGNC=12644 UniProtKB=Q15836,HUMAN HGNC=11131 UniProtKB=O00161,HUMAN HGNC=12647 UniProtKB=Q9BV40                                                                                                     | SNARE complex                                 |
| GO:2000311 | HUMAN HGNC=1406 UniProtKB=Q9Y698,HUMAN HGNC=15474 UniProtKB=Q9Y566,HUMAN HGNC=14294 UniProtKB=Q9BYB0                                                                                                                                                                                                           | regulation of AMPA receptor activity          |
| GO:0060348 | HUMAN HGNC=13937 UniProtKB=O95866,HUMAN HGNC=544 UniProtKB=P08133,HUMAN HGNC=11283 UniProtKB=P12931                                                                                                                                                                                                            | bone development                              |
| PC00032    | HUMAN HGNC=18018 UniProtKB=Q8IX18,HUMAN HGNC=15861 UniProtKB=Q9H5Z1,HUMAN HGNC=17196 UniProtKB=Q8NG08                                                                                                                                                                                                          | RNA helicase                                  |
| GO:0006952 | HUMAN HGNC=11364 UniProtKB=P40763                                                                                                                                                                                                                                                                              | defense response                              |
| PC00182    | HUMAN HGNC=9308 UniProtKB=Q15257                                                                                                                                                                                                                                                                               | phosphatase activator                         |
|            | HUMAN HGNC=23168 UniProtKB=Q8IYD8,HUMAN HGNC=10898 UniProtKB=Q15477,HUMAN HGNC=7127 UniProtKB=P40692,HUMAN HGNC=19246 UniProtKB=Q9NYB0,HUMAN HGNC=9969 UniProtKB=P35251,HUMAN HGNC=14060 UniProtKB=Q9UBZ9,HUMAN HGNC=7326 UniProtKB=P20585,HUMAN HGNC=17177 UniProtKB=Q8IUI8,HUMAN HGNC=11317 UniProtKB=Q04837 | DNA metabolism protein                        |
| GO:0007019 | HUMAN HGNC=6835 UniProtKB=P78559,HUMAN HGNC=6510 UniProtKB=P16949                                                                                                                                                                                                                                              | microtubule depolymerization                  |
| GO:0030163 | HUMAN HGNC=6501 UniProtKB=P13473,HUMAN HGNC=11820 UniProtKB=P01033,HUMAN HGNC=6737 UniProtKB=O75608,HUMAN HGNC=613 UniProtKB=P02649                                                                                                                                                                            | protein catabolic process                     |
| GO:0033554 | HUMAN HGNC=17169 UniProtKB=Q13162,HUMAN HGNC=5046 UniProtKB=P52272                                                                                                                                                                                                                                             | cellular response to stress                   |
| GO:1990719 | HUMAN HGNC=8898 UniProtKB=P07205                                                                                                                                                                                                                                                                               | C1 axonemal microtubule                       |
| GO:0042110 | HUMAN HGNC=5261 UniProtKB=P10809                                                                                                                                                                                                                                                                               | T cell activation                             |
| GO:0009755 | HUMAN HGNC=9866 UniProtKB=P13631,HUMAN HGNC=3964 UniProtKB=P01225,HUMAN HGNC=16452 UniProtKB=P0DN86,HUMAN HGNC=16721 UniProtKB=A6NKQ9                                                                                                                                                                          | hormone-mediated signaling pathway            |
| GO:0005254 | HUMAN HGNC=2062 UniProtKB=O00299,HUMAN HGNC=25240 UniProtKB=Q4KMQ2,HUMAN HGNC=13518 UniProtKB=Q9Y696,HUMAN HGNC=22222 UniProtKB=Q9C0H2                                                                                                                                                                         | chloride channel activity                     |
| GO:0046883 | HUMAN HGNC=533 UniProtKB=P04083                                                                                                                                                                                                                                                                                | regulation of hormone secretion               |
| GO:0046578 | HUMAN HGNC=6766 UniProtKB=Q8WVG6                                                                                                                                                                                                                                                                               | regulation of Ras protein signal transduction |
| GO:0042391 | HUMAN HGNC=15474 UniProtKB=Q9Y566,HUMAN HGNC=14294 UniProtKB=Q9BYB0                                                                                                                                                                                                                                            | regulation of membrane potential              |

GO:006040

1

HUMAN|HGNC=23526|UniProtKB=Q8NE86  
HUMAN|HGNC=5575|UniProtKB=A0A0B4J1V2,HUMAN|HGNC=93  
91|UniProtKB=P13861,HUMAN|HGNC=9112|UniProtKB=Q6P1K2,  
HUMAN|HGNC=9414|UniProtKB=Q13976,HUMAN|HGNC=5645|U  
niProtKB=A0A0C4DH34,HUMAN|HGNC=5549|UniProtKB=A0A0C4  
DH31,HUMAN|HGNC=5554|UniProtKB=P01743,HUMAN|HGNC=9  
411|UniProtKB=P14314,HUMAN|HGNC=9392|UniProtKB=P31323,  
HUMAN|HGNC=5480|UniProtKB=P01880,HUMAN|HGNC=5659|U  
niProtKB=A0A0C4DH38,HUMAN|HGNC=5634|UniProtKB=A0A075B  
7F0,HUMAN|HGNC=23845|UniProtKB=Q8IY92,HUMAN|HGNC=48  
31|UniProtKB=P69891,HUMAN|HGNC=38476|UniProtKB=B9A064,  
HUMAN|HGNC=11358|UniProtKB=O75886,HUMAN|HGNC=11126  
|UniProtKB=P53814,HUMAN|HGNC=5861|UniProtKB=A0M8Q6,H  
UMAN|HGNC=7729|UniProtKB=Q15019,HUMAN|HGNC=5647|Uni  
ProtKB=A0A087WSY4,HUMAN|HGNC=5563|UniProtKB=A0A075B7  
D0,HUMAN|HGNC=5856|UniProtKB=P0DOY2,HUMAN|HGNC=560  
6|UniProtKB=P01763,HUMAN|HGNC=2067|UniProtKB=O00151,H  
UMAN|HGNC=4622|UniProtKB=Q8IYD1,HUMAN|HGNC=4621|Uni  
ProtKB=P15170,HUMAN|HGNC=5576|UniProtKB=P01817,HUMAN  
|HGNC=5528|UniProtKB=P01861,HUMAN|HGNC=5541|UniProtKB  
=P01871,HUMAN|Gene=EIF2S3L|UniProtKB=Q2VIR3,HUMAN|HG  
NC=5585|UniProtKB=A0A0C4DH32,HUMAN|HGNC=2678|UniProtK  
B=P14868,HUMAN|HGNC=5551|UniProtKB=A0A0C4DH33,HUMAN  
|HGNC=17468|UniProtKB=Q96HC4,HUMAN|HGNC=5526|UniProt  
KB=P01859,HUMAN|HGNC=22958|UniProtKB=Q9NR12,HUMAN|H  
GNC=5657|UniProtKB=P0DP08,HUMAN|Ensembl=ENSG00000282  
639|UniProtKB=A0A0J9YX35,HUMAN|HGNC=3297|UniProtKB=P78  
344,HUMAN|Gene=HV309\_HUMAN|UniProtKB=P01782,HUMAN|  
HGNC=15848|UniProtKB=Q14141,HUMAN|HGNC=5654|UniProtK  
B=P01825,HUMAN|HGNC=4926|UniProtKB=O15212,HUMAN|HGN  
C=12733|UniProtKB=Q9Y6W5,HUMAN|HGNC=5553|UniProtKB=A  
0A0A0MS14,HUMAN|HGNC=9380|UniProtKB=P17612,HUMAN|Ge  
ne=HV108\_HUMAN|UniProtKB=P0DP01,HUMAN|HGNC=1488|Uni  
ProtKB=P52907,HUMAN|HGNC=5624|UniProtKB=A0A0B4J1X5,HU  
MAN|HGNC=5620|UniProtKB=P01780,HUMAN|HGNC=5598|UniPr  
otKB=A0A0C4DH35,HUMAN|HGNC=603|UniProtKB=P04114,HUM  
AN|HGNC=5580|UniProtKB=P01762,HUMAN|HGNC=5633|UniProt  
KB=A0A075B7D8,HUMAN|HGNC=5582|UniProtKB=A0A0B4J1V0,H  
UMAN|HGNC=5478|UniProtKB=P01876,HUMAN|HGNC=18423|U  
niProtKB=O75140,HUMAN|HGNC=5617|UniProtKB=A0A075B6Q5,  
HUMAN|HGNC=10898|UniProtKB=Q15477,HUMAN|HGNC=13759  
|UniProtKB=Q7L576,HUMAN|HGNC=5594|UniProtKB=P0DP03,HU  
MAN|HGNC=1717|UniProtKB=Q16181,HUMAN|HGNC=5655|UniP  
rotKB=A0A0C4DH41,HUMAN|HGNC=5238|UniProtKB=P11021,HU  
MAN|HGNC=5636|UniProtKB=A0A075B7B8,HUMAN|HGNC=5586|  
UniProtKB=A0A0B4J1V1,HUMAN|HGNC=5581|UniProtKB=P01766,  
HUMAN|HGNC=11357|UniProtKB=Q92783,HUMAN|HGNC=5622|  
UniProtKB=A0A0B4J1Y9,HUMAN|HGNC=613|UniProtKB=P02649,H  
UMAN|HGNC=5652|UniProtKB=A0A075B6R2,HUMAN|HGNC=559  
3|UniProtKB=P0DP02,HUMAN|HGNC=9381|UniProtKB=P22694,H  
UMAN|HGNC=5479|UniProtKB=P01877,HUMAN|HGNC=5619|Uni  
ProtKB=A0A0C4DH42,HUMAN|HGNC=5596|UniProtKB=P01772,H  
UMAN|HGNC=8868|UniProtKB=Q9NQP4,HUMAN|HGNC=5550|U

GO:003299

1

cytosolic calcium ion  
transport

protein-containing complex

|           |                                                                                                                                                                                                                                                                                                                                                                                                                                                                                                                                                                                                                                                                                                                                                                                                                                                                                                                                                                                                                                                                                                                                                                                                                                                                                                                                                                                                                                                                                                                                                                                                                                                                                                                                                                                                                                                                                                                                                                                                                                                                                                                                             |                                           |
|-----------|---------------------------------------------------------------------------------------------------------------------------------------------------------------------------------------------------------------------------------------------------------------------------------------------------------------------------------------------------------------------------------------------------------------------------------------------------------------------------------------------------------------------------------------------------------------------------------------------------------------------------------------------------------------------------------------------------------------------------------------------------------------------------------------------------------------------------------------------------------------------------------------------------------------------------------------------------------------------------------------------------------------------------------------------------------------------------------------------------------------------------------------------------------------------------------------------------------------------------------------------------------------------------------------------------------------------------------------------------------------------------------------------------------------------------------------------------------------------------------------------------------------------------------------------------------------------------------------------------------------------------------------------------------------------------------------------------------------------------------------------------------------------------------------------------------------------------------------------------------------------------------------------------------------------------------------------------------------------------------------------------------------------------------------------------------------------------------------------------------------------------------------------|-------------------------------------------|
|           | niProtKB=P23083,HUMAN HGNC=8761 UniProtKB=Q9BUL8,HUM<br>AN HGNC=5604 UniProtKB=A0A0B4J1X8,HUMAN HGNC=4823 U<br>niProtKB=P69905,HUMAN HGNC=4829 UniProtKB=P02042,HUMA<br>N HGNC=5525 UniProtKB=P01857,HUMAN HGNC=5662 UniProtK<br>B=A0A0B4J1U7,HUMAN HGNC=5601 UniProtKB=A0A0C4DH36,HU<br>MAN HGNC=5716 UniProtKB=P01834,HUMAN HGNC=4827 UniPr<br>otKB=P68871,HUMAN HGNC=5588 UniProtKB=P01764,HUMAN H<br>GNC=5857 UniProtKB=P0DOY3,HUMAN HGNC=9164 UniProtKB=<br>Q99719,HUMAN HGNC=5610 UniProtKB=P01767,HUMAN HGNC=<br>13919 UniProtKB=P46379,HUMAN Ensembl=ENSG00000282150 <br>UniProtKB=A0A0J9YY99,HUMAN HGNC=5527 UniProtKB=P01860,<br>HUMAN HGNC=1491 UniProtKB=P47756                                                                                                                                                                                                                                                                                                                                                                                                                                                                                                                                                                                                                                                                                                                                                                                                                                                                                                                                                                                                                                                                                                                                                                                                                                                                                                                                                                                                                                                                 |                                           |
| GO:190156 | HUMAN HGNC=7900 UniProtKB=P55786,HUMAN HGNC=13921 <br>UniProtKB=O95870,HUMAN HGNC=18173 UniProtKB=Q9NZ08,HU<br>MAN HGNC=2689 UniProtKB=P09172                                                                                                                                                                                                                                                                                                                                                                                                                                                                                                                                                                                                                                                                                                                                                                                                                                                                                                                                                                                                                                                                                                                                                                                                                                                                                                                                                                                                                                                                                                                                                                                                                                                                                                                                                                                                                                                                                                                                                                                               | organonitrogen compound catabolic process |
| GO:004665 |                                                                                                                                                                                                                                                                                                                                                                                                                                                                                                                                                                                                                                                                                                                                                                                                                                                                                                                                                                                                                                                                                                                                                                                                                                                                                                                                                                                                                                                                                                                                                                                                                                                                                                                                                                                                                                                                                                                                                                                                                                                                                                                                             |                                           |
| 1         | HUMAN HGNC=4861 UniProtKB=Q9NRZ9                                                                                                                                                                                                                                                                                                                                                                                                                                                                                                                                                                                                                                                                                                                                                                                                                                                                                                                                                                                                                                                                                                                                                                                                                                                                                                                                                                                                                                                                                                                                                                                                                                                                                                                                                                                                                                                                                                                                                                                                                                                                                                            | lymphocyte proliferation                  |
|           | HUMAN HGNC=3189 UniProtKB=P68104,HUMAN HGNC=9862 U<br>niProtKB=P61225,HUMAN HGNC=9784 UniProtKB=P61020,HUMA<br>N HGNC=19983 UniProtKB=Q86YS6,HUMAN HGNC=6407 UniPro<br>tKB=P01116,HUMAN HGNC=3200 UniProtKB=Q5VTE0,HUMAN H<br>GNC=17102 UniProtKB=Q92619,HUMAN HGNC=667 UniProtKB=P<br>61586,HUMAN HGNC=9855 UniProtKB=P62834,HUMAN HGNC=2<br>973 UniProtKB=O00429,HUMAN HGNC=9846 UniProtKB=P62826,<br>HUMAN HGNC=9840 UniProtKB=P11234,HUMAN HGNC=4393 U<br>niProtKB=P11488,HUMAN HGNC=7729 UniProtKB=Q15019,HUMA<br>N HGNC=4395 UniProtKB=P19086,HUMAN HGNC=9785 UniProtK<br>B=P51148,HUMAN HGNC=4384 UniProtKB=P63096,HUMAN HGN<br>C=9772 UniProtKB=Q13637,HUMAN HGNC=4622 UniProtKB=Q8I<br>YD1,HUMAN HGNC=9801 UniProtKB=P63000,HUMAN HGNC=462<br>1 UniProtKB=P15170,HUMAN HGNC=669 UniProtKB=P08134,HU<br>MAN HGNC=10447 UniProtKB=P10301,HUMAN HGNC=11231 Un<br>iProtKB=Q8WXF7,HUMAN HGNC=24526 UniProtKB=Q6DD88,HU<br>MAN HGNC=25694 UniProtKB=Q8TC07,HUMAN HGNC=9802 Uni<br>ProtKB=P15153,HUMAN HGNC=3214 UniProtKB=P13639,HUMAN<br> HGNC=4381 UniProtKB=Q14344,HUMAN HGNC=25571 UniProtK<br>B=Q9NVG8,HUMAN HGNC=21035 UniProtKB=Q8N392,HUMAN H<br>GNC=15848 UniProtKB=Q14141,HUMAN HGNC=18756 UniProtKB<br>=Q9BYZ6,HUMAN HGNC=2720 UniProtKB=Q9ULH1,HUMAN HGN<br>C=14902 UniProtKB=Q9NRW1,HUMAN HGNC=4387 UniProtKB=P<br>08754,HUMAN HGNC=25361 UniProtKB=Q8N264,HUMAN HGNC<br>=4227 UniProtKB=P50395,HUMAN HGNC=10701 UniProtKB=Q15<br>436,HUMAN HGNC=18423 UniProtKB=O75140,HUMAN HGNC=16<br>524 UniProtKB=P61106,HUMAN HGNC=29351 UniProtKB=QC0CH<br>5,HUMAN HGNC=1717 UniProtKB=Q16181,HUMAN HGNC=9758 <br>UniProtKB=P62820,HUMAN HGNC=18263 UniProtKB=Q9UL25,HU<br>MAN HGNC=678 UniProtKB=P52565,HUMAN HGNC=6111 UniPr<br>otKB=Q13576,HUMAN HGNC=4226 UniProtKB=P31150,HUMAN <br>HGNC=2974 UniProtKB=P50570,HUMAN HGNC=9857 UniProtKB=<br>P61224,HUMAN HGNC=679 UniProtKB=P52566,HUMAN HGNC=4<br>385 UniProtKB=P04899,HUMAN HGNC=4390 UniProtKB=P50148,<br>HUMAN HGNC=9786 UniProtKB=P20340,HUMAN HGNC=10011 <br>UniProtKB=Q15382,HUMAN HGNC=1736 UniProtKB=P60953,HU<br>MAN HGNC=9164 UniProtKB=Q99719,HUMAN HGNC=10534 Uni | GTPase activity                           |

|            |                                                                                                                                                                                                                                                                                                                                                                                                                                                                                                                                                                                                                                                                                                                                                        |                                          |
|------------|--------------------------------------------------------------------------------------------------------------------------------------------------------------------------------------------------------------------------------------------------------------------------------------------------------------------------------------------------------------------------------------------------------------------------------------------------------------------------------------------------------------------------------------------------------------------------------------------------------------------------------------------------------------------------------------------------------------------------------------------------------|------------------------------------------|
|            | ProtKB=Q9NR31,HUMAN HGNC=29125 UniProtKB=Q9UQ16,HUMAN HGNC=9847 UniProtKB=P43487,HUMAN HGNC=12363 UniProtKB=P49815,HUMAN HGNC=18370 UniProtKB=Q9H0U4,HUMAN HGNC=17073 UniProtKB=Q9UNA1                                                                                                                                                                                                                                                                                                                                                                                                                                                                                                                                                                 |                                          |
| GO:0010942 | HUMAN HGNC=5141 UniProtKB=P00738,HUMAN HGNC=5156 UniProtKB=P00739                                                                                                                                                                                                                                                                                                                                                                                                                                                                                                                                                                                                                                                                                      | positive regulation of cell death        |
| GO:0031011 | HUMAN HGNC=10474 UniProtKB=Q9Y265,HUMAN HGNC=10475 UniProtKB=Q9Y230                                                                                                                                                                                                                                                                                                                                                                                                                                                                                                                                                                                                                                                                                    | Ino80 complex                            |
| GO:0043066 | HUMAN HGNC=613 UniProtKB=P02649                                                                                                                                                                                                                                                                                                                                                                                                                                                                                                                                                                                                                                                                                                                        | negative regulation of apoptotic process |
| GO:0015871 | HUMAN HGNC=17292 UniProtKB=Q8IWA5                                                                                                                                                                                                                                                                                                                                                                                                                                                                                                                                                                                                                                                                                                                      | choline transport                        |
| GO:0071014 | HUMAN HGNC=5046 UniProtKB=P52272                                                                                                                                                                                                                                                                                                                                                                                                                                                                                                                                                                                                                                                                                                                       | post-mRNA release                        |
|            | HUMAN HGNC=12822 UniProtKB=Q9NQW7,HUMAN HGNC=9545 UniProtKB=P28062,HUMAN HGNC=9533 UniProtKB=P25789,HUMAN HGNC=26212 UniProtKB=P61009,HUMAN HGNC=9554 UniProtKB=Q99460,HUMAN HGNC=9552 UniProtKB=P62195,HUMAN HGNC=188 UniProtKB=O14672,HUMAN HGNC=1507 UniProtKB=P55212,HUMAN HGNC=9559 UniProtKB=Q13200,HUMAN HGNC=9531 UniProtKB=P25787,HUMAN HGNC=9535 UniProtKB=P60900,HUMAN HGNC=9539 UniProtKB=P49721,HUMAN HGNC=1504 UniProtKB=P42574,HUMAN HGNC=9536 UniProtKB=O14818,HUMAN HGNC=9540 UniProtKB=P49720,HUMAN HGNC=9530 UniProtKB=P25786,HUMAN HGNC=9553 UniProtKB=P62333,HUMAN HGNC=9551 UniProtKB=P43686,HUMAN HGNC=2312 UniProtKB=P15169,HUMAN HGNC=2239 UniProtKB=Q9UNS2,HUMAN HGNC=9532 UniProtKB=P25788,HUMAN HGNC=9537 UniProtKB=P20618 | spliceosomal complex                     |
| PC00190    | HUMAN HGNC=11408 UniProtKB=Q13043,HUMAN HGNC=30765 UniProtKB=Q9UKE5                                                                                                                                                                                                                                                                                                                                                                                                                                                                                                                                                                                                                                                                                    | protease                                 |
| GO:0048812 | HUMAN HGNC=8876 UniProtKB=P17858,HUMAN HGNC=1742 UniProtKB=P50851,HUMAN HGNC=618 UniProtKB=O14791,HUMAN HGNC=8878 UniProtKB=Q01813,HUMAN HGNC=679 UniProtKB=P52566,HUMAN HGNC=17102 UniProtKB=Q92619,HUMAN HGNC=17038 UniProtKB=Q99685,HUMAN HGNC=17292 UniProtKB=Q8IWA5,HUMAN HGNC=28973 UniProtKB=Q14165,HUMAN HGNC=16937 UniProtKB=O75915,HUMAN HGNC=1090 UniProtKB=Q03001,HUMAN HGNC=25268 UniProtKB=Q96LR9,HUMAN HGNC=30244 UniProtKB=Q6P1A2,HUMAN HGNC=8087 UniProtKB=P29728,HUMAN HGNC=18808 UniProtKB=Q9Y6E2,HUMAN HGNC=5048 UniProtKB=Q00839,HUMAN HGNC=10542 UniProtKB=O95248,HUMAN HGNC=678 UniProtKB=P52565                                                                                                                                | neuron projection morphogenesis          |
| GO:0016020 |                                                                                                                                                                                                                                                                                                                                                                                                                                                                                                                                                                                                                                                                                                                                                        | membrane                                 |
| GO:0030286 | HUMAN HGNC=2951 UniProtKB=Q9C0G6                                                                                                                                                                                                                                                                                                                                                                                                                                                                                                                                                                                                                                                                                                                       | dynein complex                           |
| GO:0018107 | HUMAN HGNC=10252 UniProtKB=O75116,HUMAN HGNC=1738 UniProtKB=Q9Y5S2                                                                                                                                                                                                                                                                                                                                                                                                                                                                                                                                                                                                                                                                                     | peptidyl-threonine phosphorylation       |
| GO:0035601 | HUMAN HGNC=6737 UniProtKB=O75608                                                                                                                                                                                                                                                                                                                                                                                                                                                                                                                                                                                                                                                                                                                       | protein deacylation                      |
| GO:0030133 | HUMAN HGNC=26486 UniProtKB=Q6PJW8                                                                                                                                                                                                                                                                                                                                                                                                                                                                                                                                                                                                                                                                                                                      | transport vesicle                        |
| GO:0034704 | HUMAN HGNC=23526 UniProtKB=Q8NE86                                                                                                                                                                                                                                                                                                                                                                                                                                                                                                                                                                                                                                                                                                                      | calcium channel complex                  |
| GO:0006400 | HUMAN HGNC=20 UniProtKB=P49588                                                                                                                                                                                                                                                                                                                                                                                                                                                                                                                                                                                                                                                                                                                         | tRNA modification                        |

|            |                                                                                                                                                                                                                                                                                                                                                                                                                                                                                                                                                                                                                                                                                                                                                                                                                                                          |                                                                      |
|------------|----------------------------------------------------------------------------------------------------------------------------------------------------------------------------------------------------------------------------------------------------------------------------------------------------------------------------------------------------------------------------------------------------------------------------------------------------------------------------------------------------------------------------------------------------------------------------------------------------------------------------------------------------------------------------------------------------------------------------------------------------------------------------------------------------------------------------------------------------------|----------------------------------------------------------------------|
| GO:0071621 | HUMAN HGNC=9240 UniProtKB=P02775,HUMAN HGNC=533 UniProtKB=P04083,HUMAN HGNC=10632 UniProtKB=P13501,HUMAN HGNC=8862 UniProtKB=P10720,HUMAN HGNC=8861 UniProtKB=P02776                                                                                                                                                                                                                                                                                                                                                                                                                                                                                                                                                                                                                                                                                     | granulocyte chemotaxis                                               |
| GO:0002040 | HUMAN HGNC=533 UniProtKB=P04083,HUMAN HGNC=7178 UniProtKB=Q13201                                                                                                                                                                                                                                                                                                                                                                                                                                                                                                                                                                                                                                                                                                                                                                                         | sprouting angiogenesis                                               |
| GO:0046839 | HUMAN HGNC=17059 UniProtKB=Q9NTJ5,HUMAN HGNC=10542 UniProtKB=O95248                                                                                                                                                                                                                                                                                                                                                                                                                                                                                                                                                                                                                                                                                                                                                                                      | phospholipid dephosphorylation                                       |
| GO:0030865 | HUMAN HGNC=18756 UniProtKB=Q9BYZ6,HUMAN HGNC=9802 UniProtKB=P15153,HUMAN HGNC=9801 UniProtKB=P63000                                                                                                                                                                                                                                                                                                                                                                                                                                                                                                                                                                                                                                                                                                                                                      | cortical cytoskeleton organization                                   |
| GO:0031224 | HUMAN HGNC=18587 UniProtKB=O94901                                                                                                                                                                                                                                                                                                                                                                                                                                                                                                                                                                                                                                                                                                                                                                                                                        | intrinsic component of membrane                                      |
| GO:0071456 | HUMAN HGNC=17865 UniProtKB=Q96A26                                                                                                                                                                                                                                                                                                                                                                                                                                                                                                                                                                                                                                                                                                                                                                                                                        | cellular response to hypoxia                                         |
| GO:0035091 | HUMAN HGNC=16051 UniProtKB=Q8TEW0,HUMAN HGNC=11172 UniProtKB=Q13596                                                                                                                                                                                                                                                                                                                                                                                                                                                                                                                                                                                                                                                                                                                                                                                      | phosphatidylinositol binding                                         |
| GO:0071356 | HUMAN HGNC=10632 UniProtKB=P13501                                                                                                                                                                                                                                                                                                                                                                                                                                                                                                                                                                                                                                                                                                                                                                                                                        | cellular response to tumor necrosis factor                           |
| GO:0120115 | HUMAN HGNC=20471 UniProtKB=O95777,HUMAN HGNC=17259 UniProtKB=Q9Y4Z0                                                                                                                                                                                                                                                                                                                                                                                                                                                                                                                                                                                                                                                                                                                                                                                      | Lsm2-8 complex                                                       |
| GO:0003729 | HUMAN HGNC=27424 UniProtKB=Q5T481,HUMAN HGNC=8648 UniProtKB=Q15366,HUMAN HGNC=5046 UniProtKB=P52272,HUMAN HGNC=20165 UniProtKB=Q9P2P1,HUMAN HGNC=117 UniProtKB=P21399,HUMAN HGNC=9583 UniProtKB=P26599,HUMAN HGNC=1243 UniProtKB=Q07021,HUMAN HGNC=8647 UniProtKB=Q15365,HUMAN HGNC=17894 UniProtKB=Q14966,HUMAN HGNC=29513 UniProtKB=O60306,HUMAN HGNC=5044 UniProtKB=P61978,HUMAN HGNC=3297 UniProtKB=P78344                                                                                                                                                                                                                                                                                                                                                                                                                                           | mRNA binding<br>positive regulation of neuron projection development |
| GO:0010976 | HUMAN HGNC=9621 UniProtKB=Q6IBS0,HUMAN HGNC=15474 UniProtKB=Q9Y566,HUMAN HGNC=14294 UniProtKB=Q9BYB0                                                                                                                                                                                                                                                                                                                                                                                                                                                                                                                                                                                                                                                                                                                                                     |                                                                      |
| GO:0036094 | HUMAN HGNC=7694 UniProtKB=O14561,HUMAN HGNC=9922 UniProtKB=P02753,HUMAN HGNC=4458 UniProtKB=P06744,HUMAN HGNC=4187 UniProtKB=P02774,HUMAN HGNC=26801 UniProtKB=Q8N8Q8,HUMAN HGNC=11834 UniProtKB=P29401,HUMAN HGNC=6631 UniProtKB=P49257,HUMAN HGNC=3951 UniProtKB=Q16595,HUMAN HGNC=9723 UniProtKB=P11216,HUMAN HGNC=9725 UniProtKB=P06737                                                                                                                                                                                                                                                                                                                                                                                                                                                                                                              | small molecule binding                                               |
| GO:0030041 | HUMAN HGNC=12733 UniProtKB=Q9Y6W5,HUMAN HGNC=1488 UniProtKB=P52907,HUMAN HGNC=2696 UniProtKB=Q9UJU6,HUMAN HGNC=4374 UniProtKB=O60234,HUMAN HGNC=3338 UniProtKB=Q14247,HUMAN HGNC=9581 UniProtKB=Q9H939,HUMAN HGNC=706 UniProtKB=O15145,HUMAN HGNC=170 UniProtKB=P61158,HUMAN HGNC=3750 UniProtKB=Q13045,HUMAN HGNC=15667 UniProtKB=P58546,HUMAN HGNC=708 UniProtKB=O15511,HUMAN HGNC=12652 UniProtKB=P50552,HUMAN HGNC=12690 UniProtKB=P09327,HUMAN HGNC=705 UniProtKB=O15144,HUMAN HGNC=2695 UniProtKB=Q16643,HUMAN HGNC=8881 UniProtKB=P07737,HUMAN HGNC=169 UniProtKB=P61160,HUMAN HGNC=18304 UniProtKB=Q14019,HUMAN HGNC=9621 UniProtKB=Q6IBS0,HUMAN HGNC=243 UniProtKB=P35611,HUMAN HGNC=704 UniProtKB=O15143,HUMAN HGNC=1491 UniProtKB=P47756,HUMAN HGNC=4844 UniProtKB=P14317,HUMAN HGNC=11881 UniProtKB=P62328,HUMAN HGNC=21035 UniProtKB=Q8N392 | actin filament polymerization                                        |

|            |                                                                                                                                                                                                                                                                                                                                                                                                                                                                                                                                                                                                                                                                                                                                                                                                                                                                                                                                                                                                                                                                                                                                                                                                                                                                                                                                                                                                                                                                                                                                                                                                                                                                                                                                                                                                                                                                                                                                                                                                                                                                                                                                                                                                                                                                                                                                                                                                                                                                                                                                                                                                                                                                                                                                                                                                                                                                                                                                                                                                                                                                                                                                                                                                                                                                                                                                                                                                                                                                                                                                                                                                                                                                                                                                                                                                                                                                                                                                                                                                                                                                                                                                                                                                                                                                                                                                                                                                                                                                                                                                                                                                                                                                                                                                                                                                                                                                                                                                                                                                                                                                                                                                                                                                                                                                                                                                                                                                                                                                                                                                                                                                                                                                                                                                                                                                                                                                                                                                                                                                                                                                                                                                                                                                                                                                                                                                                                                                                                                                                                                                                                                                                                                                                                                                                                                                                                                                                                                                                                                                                                                                                                                                                                                                                                                                                                                                                                                                                                                                                                                                                                                                                                                                                                                                                                                                                                                                                                                                                                                                                                                                                                                                                                                                                                                                                                                                                                                                                                                                                                                                                                                                                                                                                                                                                                                                                                                                                                                                                                                                                                                                                                                                                                                                                                                                                                                                                                                                                                                                                                                                                                                                                                                                                                                                                                                                                                                                                                                                                                                                                                                                                                                                                                                                                                                                                                                                                                                                                                                                                                                                                                                                                                                                                                                                                                                                                                                                                                                                                                                                                                                                                                                                                                                                                                                                                                                                                                                                                                                                                                                                                                                                                                                                                                                                                                                                                                                                                                                                                                                                                                                                                                                                                                                                                                                                                                                                                                                                                                                                                                                                                                                                                                                                                                                                                                                                                                                                                                                                                                                                                                                                                                                                                                                                                                                                                                                                                                                                                                                                                                                                                                                                                                                                                                                                                                                                                                                                                                                                                                                                                                                                                                                                                                                                                                                                                                                                                                                                                                                                                                                                                                                                                                                                                                                                                                                                                                                                                                                                                                                                                                                                                                                                                                                                                                                                                                                                                                                                                                                                                                                                                                                                                                                                                                                                                                                                                                                                                                                                                                                                                                                                                                                                                                                                                                                                                                                                                                                                                                                                                                                                                                                                                                                                                                                                                                                                                                                                                                                                                                                                                                                                                                                                                                                                                                                                                                                                                                                                                                                                                                                                                                                                                                                                                                                                                                                                                                                                                                                                                                                                                                                                                                                                                                                                                                                                                                                                                                                                                                                                                                                                                                                                                                                                                                                                                                                                                                                                                                                                                                |                                                                  |
|------------|----------------------------------------------------------------------------------------------------------------------------------------------------------------------------------------------------------------------------------------------------------------------------------------------------------------------------------------------------------------------------------------------------------------------------------------------------------------------------------------------------------------------------------------------------------------------------------------------------------------------------------------------------------------------------------------------------------------------------------------------------------------------------------------------------------------------------------------------------------------------------------------------------------------------------------------------------------------------------------------------------------------------------------------------------------------------------------------------------------------------------------------------------------------------------------------------------------------------------------------------------------------------------------------------------------------------------------------------------------------------------------------------------------------------------------------------------------------------------------------------------------------------------------------------------------------------------------------------------------------------------------------------------------------------------------------------------------------------------------------------------------------------------------------------------------------------------------------------------------------------------------------------------------------------------------------------------------------------------------------------------------------------------------------------------------------------------------------------------------------------------------------------------------------------------------------------------------------------------------------------------------------------------------------------------------------------------------------------------------------------------------------------------------------------------------------------------------------------------------------------------------------------------------------------------------------------------------------------------------------------------------------------------------------------------------------------------------------------------------------------------------------------------------------------------------------------------------------------------------------------------------------------------------------------------------------------------------------------------------------------------------------------------------------------------------------------------------------------------------------------------------------------------------------------------------------------------------------------------------------------------------------------------------------------------------------------------------------------------------------------------------------------------------------------------------------------------------------------------------------------------------------------------------------------------------------------------------------------------------------------------------------------------------------------------------------------------------------------------------------------------------------------------------------------------------------------------------------------------------------------------------------------------------------------------------------------------------------------------------------------------------------------------------------------------------------------------------------------------------------------------------------------------------------------------------------------------------------------------------------------------------------------------------------------------------------------------------------------------------------------------------------------------------------------------------------------------------------------------------------------------------------------------------------------------------------------------------------------------------------------------------------------------------------------------------------------------------------------------------------------------------------------------------------------------------------------------------------------------------------------------------------------------------------------------------------------------------------------------------------------------------------------------------------------------------------------------------------------------------------------------------------------------------------------------------------------------------------------------------------------------------------------------------------------------------------------------------------------------------------------------------------------------------------------------------------------------------------------------------------------------------------------------------------------------------------------------------------------------------------------------------------------------------------------------------------------------------------------------------------------------------------------------------------------------------------------------------------------------------------------------------------------------------------------------------------------------------------------------------------------------------------------------------------------------------------------------------------------------------------------------------------------------------------------------------------------------------------------------------------------------------------------------------------------------------------------------------------------------------------------------------------------------------------------------------------------------------------------------------------------------------------------------------------------------------------------------------------------------------------------------------------------------------------------------------------------------------------------------------------------------------------------------------------------------------------------------------------------------------------------------------------------------------------------------------------------------------------------------------------------------------------------------------------------------------------------------------------------------------------------------------------------------------------------------------------------------------------------------------------------------------------------------------------------------------------------------------------------------------------------------------------------------------------------------------------------------------------------------------------------------------------------------------------------------------------------------------------------------------------------------------------------------------------------------------------------------------------------------------------------------------------------------------------------------------------------------------------------------------------------------------------------------------------------------------------------------------------------------------------------------------------------------------------------------------------------------------------------------------------------------------------------------------------------------------------------------------------------------------------------------------------------------------------------------------------------------------------------------------------------------------------------------------------------------------------------------------------------------------------------------------------------------------------------------------------------------------------------------------------------------------------------------------------------------------------------------------------------------------------------------------------------------------------------------------------------------------------------------------------------------------------------------------------------------------------------------------------------------------------------------------------------------------------------------------------------------------------------------------------------------------------------------------------------------------------------------------------------------------------------------------------------------------------------------------------------------------------------------------------------------------------------------------------------------------------------------------------------------------------------------------------------------------------------------------------------------------------------------------------------------------------------------------------------------------------------------------------------------------------------------------------------------------------------------------------------------------------------------------------------------------------------------------------------------------------------------------------------------------------------------------------------------------------------------------------------------------------------------------------------------------------------------------------------------------------------------------------------------------------------------------------------------------------------------------------------------------------------------------------------------------------------------------------------------------------------------------------------------------------------------------------------------------------------------------------------------------------------------------------------------------------------------------------------------------------------------------------------------------------------------------------------------------------------------------------------------------------------------------------------------------------------------------------------------------------------------------------------------------------------------------------------------------------------------------------------------------------------------------------------------------------------------------------------------------------------------------------------------------------------------------------------------------------------------------------------------------------------------------------------------------------------------------------------------------------------------------------------------------------------------------------------------------------------------------------------------------------------------------------------------------------------------------------------------------------------------------------------------------------------------------------------------------------------------------------------------------------------------------------------------------------------------------------------------------------------------------------------------------------------------------------------------------------------------------------------------------------------------------------------------------------------------------------------------------------------------------------------------------------------------------------------------------------------------------------------------------------------------------------------------------------------------------------------------------------------------------------------------------------------------------------------------------------------------------------------------------------------------------------------------------------------------------------------------------------------------------------------------------------------------------------------------------------------------------------------------------------------------------------------------------------------------------------------------------------------------------------------------------------------------------------------------------------------------------------------------------------------------------------------------------------------------------------------------------------------------------------------------------------------------------------------------------------------------------------------------------------------------------------------------------------------------------------------------------------------------------------------------------------------------------------------------------------------------------------------------------------------------------------------------------------------------------------------------------------------------------------------------------------------------------------------------------------------------------------------------------------------------------------------------------------------------------------------------------------------------------------------------------------------------------------------------------------------------------------------------------------------------------------------------------------------------------------------------------------------------------------------------------------------------------------------------------------------------------------------------------------------------------------------------------------------------------------------------------------------------------------------------------------------------------------------------------------------------------------------------------------------------------------------------------------------------------------------------------------------------------------------------------------------------------------------------------------------------------------------------------------------------------------------------------------------------------------------------------------------------------------------------------------------------------------------------------------------------------------------------------------------------------------------------------------------------------------------------------------------------------------------------------------------------------------------------------------------------------------------------------------------------------------------------------------------------------------------------------------------------------------------------------------------------------------------------------------------------------------------------------------------------------------------------------------------------------------------------------------------------------------------------------------------------------------------------------------------------------------------------------------------------------------------------------------------------------------------------------------------------------------------------------------------------------------------------------------------------------------------------------------------------------------------------------------------------------------------------------------------------------------------------------------------------------------------------------------------------------------------------------------------------------------------------------------------------------------------------------------------------------------------------------------------------------------------------------------------------------------------------------------------------------------------------------------------------------------------------------------------------------------------------------------------------------------------------------------------------------------------------------------------------------------------------------------------------------------------------------------------------------------------------------------------------------------------------------------------------------------------------------------------------------------------------------------------------------------------------------------------------------------------------------------------------------------------------------------------------------------------------------------------------------------------------------------------------------------------------------------------------------------------------------------------------------------------------------------------------------------------------------------------------------------------------------------------------------------------------------------------------------------------------------------------------------------------------------------------------------------------------------------------------------------------------------------------------------------------------------------------------------------------------------------------------------------------------------------------------------------------------------------------------------------------------------------------------------------------------------------------------------------------------------------------------------------------------------------------------------------------------------------------------------------------------------------------------------------------------------------------------------------------------------------------------------------------------------------------------------------------------------------------------------------------------------------------------------------------------------------------------------------------------------------------------------------------------------------------------------------------------------------------------------------------------------------------------------------------------------------------------------------|------------------------------------------------------------------|
| GO:0000387 | HUMAN HGNC=17259 UniProtKB=Q9Y4Z0,HUMAN HGNC=30796 UniProtKB=Q9Y3F4                                                                                                                                                                                                                                                                                                                                                                                                                                                                                                                                                                                                                                                                                                                                                                                                                                                                                                                                                                                                                                                                                                                                                                                                                                                                                                                                                                                                                                                                                                                                                                                                                                                                                                                                                                                                                                                                                                                                                                                                                                                                                                                                                                                                                                                                                                                                                                                                                                                                                                                                                                                                                                                                                                                                                                                                                                                                                                                                                                                                                                                                                                                                                                                                                                                                                                                                                                                                                                                                                                                                                                                                                                                                                                                                                                                                                                                                                                                                                                                                                                                                                                                                                                                                                                                                                                                                                                                                                                                                                                                                                                                                                                                                                                                                                                                                                                                                                                                                                                                                                                                                                                                                                                                                                                                                                                                                                                                                                                                                                                                                                                                                                                                                                                                                                                                                                                                                                                                                                                                                                                                                                                                                                                                                                                                                                                                                                                                                                                                                                                                                                                                                                                                                                                                                                                                                                                                                                                                                                                                                                                                                                                                                                                                                                                                                                                                                                                                                                                                                                                                                                                                                                                                                                                                                                                                                                                                                                                                                                                                                                                                                                                                                                                                                                                                                                                                                                                                                                                                                                                                                                                                                                                                                                                                                                                                                                                                                                                                                                                                                                                                                                                                                                                                                                                                                                                                                                                                                                                                                                                                                                                                                                                                                                                                                                                                                                                                                                                                                                                                                                                                                                                                                                                                                                                                                                                                                                                                                                                                                                                                                                                                                                                                                                                                                                                                                                                                                                                                                                                                                                                                                                                                                                                                                                                                                                                                                                                                                                                                                                                                                                                                                                                                                                                                                                                                                                                                                                                                                                                                                                                                                                                                                                                                                                                                                                                                                                                                                                                                                                                                                                                                                                                                                                                                                                                                                                                                                                                                                                                                                                                                                                                                                                                                                                                                                                                                                                                                                                                                                                                                                                                                                                                                                                                                                                                                                                                                                                                                                                                                                                                                                                                                                                                                                                                                                                                                                                                                                                                                                                                                                                                                                                                                                                                                                                                                                                                                                                                                                                                                                                                                                                                                                                                                                                                                                                                                                                                                                                                                                                                                                                                                                                                                                                                                                                                                                                                                                                                                                                                                                                                                                                                                                                                                                                                                                                                                                                                                                                                                                                                                                                                                                                                                                                                                                                                                                                                                                                                                                                                                                                                                                                                                                                                                                                                                                                                                                                                                                                                                                                                                                                                                                                                                                                                                                                                                                                                                                                                                                                                                                                                                                                                                                                                                                                                                                                                                                                                                                                                                                                                                                                                                                                                                                                                                                                                                                                                                                                            | spliceosomal snRNP assembly                                      |
| GO:0008173 | HUMAN HGNC=17136 UniProtKB=Q8IY81                                                                                                                                                                                                                                                                                                                                                                                                                                                                                                                                                                                                                                                                                                                                                                                                                                                                                                                                                                                                                                                                                                                                                                                                                                                                                                                                                                                                                                                                                                                                                                                                                                                                                                                                                                                                                                                                                                                                                                                                                                                                                                                                                                                                                                                                                                                                                                                                                                                                                                                                                                                                                                                                                                                                                                                                                                                                                                                                                                                                                                                                                                                                                                                                                                                                                                                                                                                                                                                                                                                                                                                                                                                                                                                                                                                                                                                                                                                                                                                                                                                                                                                                                                                                                                                                                                                                                                                                                                                                                                                                                                                                                                                                                                                                                                                                                                                                                                                                                                                                                                                                                                                                                                                                                                                                                                                                                                                                                                                                                                                                                                                                                                                                                                                                                                                                                                                                                                                                                                                                                                                                                                                                                                                                                                                                                                                                                                                                                                                                                                                                                                                                                                                                                                                                                                                                                                                                                                                                                                                                                                                                                                                                                                                                                                                                                                                                                                                                                                                                                                                                                                                                                                                                                                                                                                                                                                                                                                                                                                                                                                                                                                                                                                                                                                                                                                                                                                                                                                                                                                                                                                                                                                                                                                                                                                                                                                                                                                                                                                                                                                                                                                                                                                                                                                                                                                                                                                                                                                                                                                                                                                                                                                                                                                                                                                                                                                                                                                                                                                                                                                                                                                                                                                                                                                                                                                                                                                                                                                                                                                                                                                                                                                                                                                                                                                                                                                                                                                                                                                                                                                                                                                                                                                                                                                                                                                                                                                                                                                                                                                                                                                                                                                                                                                                                                                                                                                                                                                                                                                                                                                                                                                                                                                                                                                                                                                                                                                                                                                                                                                                                                                                                                                                                                                                                                                                                                                                                                                                                                                                                                                                                                                                                                                                                                                                                                                                                                                                                                                                                                                                                                                                                                                                                                                                                                                                                                                                                                                                                                                                                                                                                                                                                                                                                                                                                                                                                                                                                                                                                                                                                                                                                                                                                                                                                                                                                                                                                                                                                                                                                                                                                                                                                                                                                                                                                                                                                                                                                                                                                                                                                                                                                                                                                                                                                                                                                                                                                                                                                                                                                                                                                                                                                                                                                                                                                                                                                                                                                                                                                                                                                                                                                                                                                                                                                                                                                                                                                                                                                                                                                                                                                                                                                                                                                                                                                                                                                                                                                                                                                                                                                                                                                                                                                                                                                                                                                                                                                                                                                                                                                                                                                                                                                                                                                                                                                                                                                                                                                                                                                                                                                                                                                                                                                                                                                                                                                                                                                                                                              | RNA methyltransferase activity                                   |
| GO:0042058 | HUMAN HGNC=25153 UniProtKB=Q96EY5                                                                                                                                                                                                                                                                                                                                                                                                                                                                                                                                                                                                                                                                                                                                                                                                                                                                                                                                                                                                                                                                                                                                                                                                                                                                                                                                                                                                                                                                                                                                                                                                                                                                                                                                                                                                                                                                                                                                                                                                                                                                                                                                                                                                                                                                                                                                                                                                                                                                                                                                                                                                                                                                                                                                                                                                                                                                                                                                                                                                                                                                                                                                                                                                                                                                                                                                                                                                                                                                                                                                                                                                                                                                                                                                                                                                                                                                                                                                                                                                                                                                                                                                                                                                                                                                                                                                                                                                                                                                                                                                                                                                                                                                                                                                                                                                                                                                                                                                                                                                                                                                                                                                                                                                                                                                                                                                                                                                                                                                                                                                                                                                                                                                                                                                                                                                                                                                                                                                                                                                                                                                                                                                                                                                                                                                                                                                                                                                                                                                                                                                                                                                                                                                                                                                                                                                                                                                                                                                                                                                                                                                                                                                                                                                                                                                                                                                                                                                                                                                                                                                                                                                                                                                                                                                                                                                                                                                                                                                                                                                                                                                                                                                                                                                                                                                                                                                                                                                                                                                                                                                                                                                                                                                                                                                                                                                                                                                                                                                                                                                                                                                                                                                                                                                                                                                                                                                                                                                                                                                                                                                                                                                                                                                                                                                                                                                                                                                                                                                                                                                                                                                                                                                                                                                                                                                                                                                                                                                                                                                                                                                                                                                                                                                                                                                                                                                                                                                                                                                                                                                                                                                                                                                                                                                                                                                                                                                                                                                                                                                                                                                                                                                                                                                                                                                                                                                                                                                                                                                                                                                                                                                                                                                                                                                                                                                                                                                                                                                                                                                                                                                                                                                                                                                                                                                                                                                                                                                                                                                                                                                                                                                                                                                                                                                                                                                                                                                                                                                                                                                                                                                                                                                                                                                                                                                                                                                                                                                                                                                                                                                                                                                                                                                                                                                                                                                                                                                                                                                                                                                                                                                                                                                                                                                                                                                                                                                                                                                                                                                                                                                                                                                                                                                                                                                                                                                                                                                                                                                                                                                                                                                                                                                                                                                                                                                                                                                                                                                                                                                                                                                                                                                                                                                                                                                                                                                                                                                                                                                                                                                                                                                                                                                                                                                                                                                                                                                                                                                                                                                                                                                                                                                                                                                                                                                                                                                                                                                                                                                                                                                                                                                                                                                                                                                                                                                                                                                                                                                                                                                                                                                                                                                                                                                                                                                                                                                                                                                                                                                                                                                                                                                                                                                                                                                                                                                                                                                                                                                                                                              | regulation of epidermal growth factor receptor signaling pathway |
| GO:0043407 | HUMAN HGNC=9673 UniProtKB=Q12913                                                                                                                                                                                                                                                                                                                                                                                                                                                                                                                                                                                                                                                                                                                                                                                                                                                                                                                                                                                                                                                                                                                                                                                                                                                                                                                                                                                                                                                                                                                                                                                                                                                                                                                                                                                                                                                                                                                                                                                                                                                                                                                                                                                                                                                                                                                                                                                                                                                                                                                                                                                                                                                                                                                                                                                                                                                                                                                                                                                                                                                                                                                                                                                                                                                                                                                                                                                                                                                                                                                                                                                                                                                                                                                                                                                                                                                                                                                                                                                                                                                                                                                                                                                                                                                                                                                                                                                                                                                                                                                                                                                                                                                                                                                                                                                                                                                                                                                                                                                                                                                                                                                                                                                                                                                                                                                                                                                                                                                                                                                                                                                                                                                                                                                                                                                                                                                                                                                                                                                                                                                                                                                                                                                                                                                                                                                                                                                                                                                                                                                                                                                                                                                                                                                                                                                                                                                                                                                                                                                                                                                                                                                                                                                                                                                                                                                                                                                                                                                                                                                                                                                                                                                                                                                                                                                                                                                                                                                                                                                                                                                                                                                                                                                                                                                                                                                                                                                                                                                                                                                                                                                                                                                                                                                                                                                                                                                                                                                                                                                                                                                                                                                                                                                                                                                                                                                                                                                                                                                                                                                                                                                                                                                                                                                                                                                                                                                                                                                                                                                                                                                                                                                                                                                                                                                                                                                                                                                                                                                                                                                                                                                                                                                                                                                                                                                                                                                                                                                                                                                                                                                                                                                                                                                                                                                                                                                                                                                                                                                                                                                                                                                                                                                                                                                                                                                                                                                                                                                                                                                                                                                                                                                                                                                                                                                                                                                                                                                                                                                                                                                                                                                                                                                                                                                                                                                                                                                                                                                                                                                                                                                                                                                                                                                                                                                                                                                                                                                                                                                                                                                                                                                                                                                                                                                                                                                                                                                                                                                                                                                                                                                                                                                                                                                                                                                                                                                                                                                                                                                                                                                                                                                                                                                                                                                                                                                                                                                                                                                                                                                                                                                                                                                                                                                                                                                                                                                                                                                                                                                                                                                                                                                                                                                                                                                                                                                                                                                                                                                                                                                                                                                                                                                                                                                                                                                                                                                                                                                                                                                                                                                                                                                                                                                                                                                                                                                                                                                                                                                                                                                                                                                                                                                                                                                                                                                                                                                                                                                                                                                                                                                                                                                                                                                                                                                                                                                                                                                                                                                                                                                                                                                                                                                                                                                                                                                                                                                                                                                                                                                                                                                                                                                                                                                                                                                                                                                                                                                                                                                               | negative regulation of MAP kinase activity                       |
| GO:0072686 | HUMAN HGNC=14906 UniProtKB=Q8N4C6                                                                                                                                                                                                                                                                                                                                                                                                                                                                                                                                                                                                                                                                                                                                                                                                                                                                                                                                                                                                                                                                                                                                                                                                                                                                                                                                                                                                                                                                                                                                                                                                                                                                                                                                                                                                                                                                                                                                                                                                                                                                                                                                                                                                                                                                                                                                                                                                                                                                                                                                                                                                                                                                                                                                                                                                                                                                                                                                                                                                                                                                                                                                                                                                                                                                                                                                                                                                                                                                                                                                                                                                                                                                                                                                                                                                                                                                                                                                                                                                                                                                                                                                                                                                                                                                                                                                                                                                                                                                                                                                                                                                                                                                                                                                                                                                                                                                                                                                                                                                                                                                                                                                                                                                                                                                                                                                                                                                                                                                                                                                                                                                                                                                                                                                                                                                                                                                                                                                                                                                                                                                                                                                                                                                                                                                                                                                                                                                                                                                                                                                                                                                                                                                                                                                                                                                                                                                                                                                                                                                                                                                                                                                                                                                                                                                                                                                                                                                                                                                                                                                                                                                                                                                                                                                                                                                                                                                                                                                                                                                                                                                                                                                                                                                                                                                                                                                                                                                                                                                                                                                                                                                                                                                                                                                                                                                                                                                                                                                                                                                                                                                                                                                                                                                                                                                                                                                                                                                                                                                                                                                                                                                                                                                                                                                                                                                                                                                                                                                                                                                                                                                                                                                                                                                                                                                                                                                                                                                                                                                                                                                                                                                                                                                                                                                                                                                                                                                                                                                                                                                                                                                                                                                                                                                                                                                                                                                                                                                                                                                                                                                                                                                                                                                                                                                                                                                                                                                                                                                                                                                                                                                                                                                                                                                                                                                                                                                                                                                                                                                                                                                                                                                                                                                                                                                                                                                                                                                                                                                                                                                                                                                                                                                                                                                                                                                                                                                                                                                                                                                                                                                                                                                                                                                                                                                                                                                                                                                                                                                                                                                                                                                                                                                                                                                                                                                                                                                                                                                                                                                                                                                                                                                                                                                                                                                                                                                                                                                                                                                                                                                                                                                                                                                                                                                                                                                                                                                                                                                                                                                                                                                                                                                                                                                                                                                                                                                                                                                                                                                                                                                                                                                                                                                                                                                                                                                                                                                                                                                                                                                                                                                                                                                                                                                                                                                                                                                                                                                                                                                                                                                                                                                                                                                                                                                                                                                                                                                                                                                                                                                                                                                                                                                                                                                                                                                                                                                                                                                                                                                                                                                                                                                                                                                                                                                                                                                                                                                                                                                                                                                                                                                                                                                                                                                                                                                                                                                                                                                                                                              | mitotic spindle                                                  |
| GO:0030125 | HUMAN HGNC=25951 UniProtKB=Q6ULP2,HUMAN HGNC=555 UniProtKB=O43747,HUMAN HGNC=23186 UniProtKB=Q14677,HUMAN HGNC=2090 UniProtKB=P09496,HUMAN HGNC=561 UniProtKB=O95782                                                                                                                                                                                                                                                                                                                                                                                                                                                                                                                                                                                                                                                                                                                                                                                                                                                                                                                                                                                                                                                                                                                                                                                                                                                                                                                                                                                                                                                                                                                                                                                                                                                                                                                                                                                                                                                                                                                                                                                                                                                                                                                                                                                                                                                                                                                                                                                                                                                                                                                                                                                                                                                                                                                                                                                                                                                                                                                                                                                                                                                                                                                                                                                                                                                                                                                                                                                                                                                                                                                                                                                                                                                                                                                                                                                                                                                                                                                                                                                                                                                                                                                                                                                                                                                                                                                                                                                                                                                                                                                                                                                                                                                                                                                                                                                                                                                                                                                                                                                                                                                                                                                                                                                                                                                                                                                                                                                                                                                                                                                                                                                                                                                                                                                                                                                                                                                                                                                                                                                                                                                                                                                                                                                                                                                                                                                                                                                                                                                                                                                                                                                                                                                                                                                                                                                                                                                                                                                                                                                                                                                                                                                                                                                                                                                                                                                                                                                                                                                                                                                                                                                                                                                                                                                                                                                                                                                                                                                                                                                                                                                                                                                                                                                                                                                                                                                                                                                                                                                                                                                                                                                                                                                                                                                                                                                                                                                                                                                                                                                                                                                                                                                                                                                                                                                                                                                                                                                                                                                                                                                                                                                                                                                                                                                                                                                                                                                                                                                                                                                                                                                                                                                                                                                                                                                                                                                                                                                                                                                                                                                                                                                                                                                                                                                                                                                                                                                                                                                                                                                                                                                                                                                                                                                                                                                                                                                                                                                                                                                                                                                                                                                                                                                                                                                                                                                                                                                                                                                                                                                                                                                                                                                                                                                                                                                                                                                                                                                                                                                                                                                                                                                                                                                                                                                                                                                                                                                                                                                                                                                                                                                                                                                                                                                                                                                                                                                                                                                                                                                                                                                                                                                                                                                                                                                                                                                                                                                                                                                                                                                                                                                                                                                                                                                                                                                                                                                                                                                                                                                                                                                                                                                                                                                                                                                                                                                                                                                                                                                                                                                                                                                                                                                                                                                                                                                                                                                                                                                                                                                                                                                                                                                                                                                                                                                                                                                                                                                                                                                                                                                                                                                                                                                                                                                                                                                                                                                                                                                                                                                                                                                                                                                                                                                                                                                                                                                                                                                                                                                                                                                                                                                                                                                                                                                                                                                                                                                                                                                                                                                                                                                                                                                                                                                                                                                                                                                                                                                                                                                                                                                                                                                                                                                                                                                                                                                                                                                                                                                                                                                                                                                                                                                                                                                                                                                                                                                           | clathrin vesicle coat                                            |
| GO:0043005 | HUMAN HGNC=29943 UniProtKB=Q9NT68,HUMAN HGNC=26555 UniProtKB=Q3SY00,HUMAN HGNC=19296 UniProtKB=Q9UF33,HUMAN HGNC=6510 UniProtKB=P16949,HUMAN HGNC=492 UniProtKB=P16157                                                                                                                                                                                                                                                                                                                                                                                                                                                                                                                                                                                                                                                                                                                                                                                                                                                                                                                                                                                                                                                                                                                                                                                                                                                                                                                                                                                                                                                                                                                                                                                                                                                                                                                                                                                                                                                                                                                                                                                                                                                                                                                                                                                                                                                                                                                                                                                                                                                                                                                                                                                                                                                                                                                                                                                                                                                                                                                                                                                                                                                                                                                                                                                                                                                                                                                                                                                                                                                                                                                                                                                                                                                                                                                                                                                                                                                                                                                                                                                                                                                                                                                                                                                                                                                                                                                                                                                                                                                                                                                                                                                                                                                                                                                                                                                                                                                                                                                                                                                                                                                                                                                                                                                                                                                                                                                                                                                                                                                                                                                                                                                                                                                                                                                                                                                                                                                                                                                                                                                                                                                                                                                                                                                                                                                                                                                                                                                                                                                                                                                                                                                                                                                                                                                                                                                                                                                                                                                                                                                                                                                                                                                                                                                                                                                                                                                                                                                                                                                                                                                                                                                                                                                                                                                                                                                                                                                                                                                                                                                                                                                                                                                                                                                                                                                                                                                                                                                                                                                                                                                                                                                                                                                                                                                                                                                                                                                                                                                                                                                                                                                                                                                                                                                                                                                                                                                                                                                                                                                                                                                                                                                                                                                                                                                                                                                                                                                                                                                                                                                                                                                                                                                                                                                                                                                                                                                                                                                                                                                                                                                                                                                                                                                                                                                                                                                                                                                                                                                                                                                                                                                                                                                                                                                                                                                                                                                                                                                                                                                                                                                                                                                                                                                                                                                                                                                                                                                                                                                                                                                                                                                                                                                                                                                                                                                                                                                                                                                                                                                                                                                                                                                                                                                                                                                                                                                                                                                                                                                                                                                                                                                                                                                                                                                                                                                                                                                                                                                                                                                                                                                                                                                                                                                                                                                                                                                                                                                                                                                                                                                                                                                                                                                                                                                                                                                                                                                                                                                                                                                                                                                                                                                                                                                                                                                                                                                                                                                                                                                                                                                                                                                                                                                                                                                                                                                                                                                                                                                                                                                                                                                                                                                                                                                                                                                                                                                                                                                                                                                                                                                                                                                                                                                                                                                                                                                                                                                                                                                                                                                                                                                                                                                                                                                                                                                                                                                                                                                                                                                                                                                                                                                                                                                                                                                                                                                                                                                                                                                                                                                                                                                                                                                                                                                                                                                                                                                                                                                                                                                                                                                                                                                                                                                                                                                                                                                                                                                                                                                                                                                                                                                                                                                                                                                                                                                                                                                         | neuron projection                                                |
| GO:0007259 | HUMAN HGNC=11364 UniProtKB=P40763                                                                                                                                                                                                                                                                                                                                                                                                                                                                                                                                                                                                                                                                                                                                                                                                                                                                                                                                                                                                                                                                                                                                                                                                                                                                                                                                                                                                                                                                                                                                                                                                                                                                                                                                                                                                                                                                                                                                                                                                                                                                                                                                                                                                                                                                                                                                                                                                                                                                                                                                                                                                                                                                                                                                                                                                                                                                                                                                                                                                                                                                                                                                                                                                                                                                                                                                                                                                                                                                                                                                                                                                                                                                                                                                                                                                                                                                                                                                                                                                                                                                                                                                                                                                                                                                                                                                                                                                                                                                                                                                                                                                                                                                                                                                                                                                                                                                                                                                                                                                                                                                                                                                                                                                                                                                                                                                                                                                                                                                                                                                                                                                                                                                                                                                                                                                                                                                                                                                                                                                                                                                                                                                                                                                                                                                                                                                                                                                                                                                                                                                                                                                                                                                                                                                                                                                                                                                                                                                                                                                                                                                                                                                                                                                                                                                                                                                                                                                                                                                                                                                                                                                                                                                                                                                                                                                                                                                                                                                                                                                                                                                                                                                                                                                                                                                                                                                                                                                                                                                                                                                                                                                                                                                                                                                                                                                                                                                                                                                                                                                                                                                                                                                                                                                                                                                                                                                                                                                                                                                                                                                                                                                                                                                                                                                                                                                                                                                                                                                                                                                                                                                                                                                                                                                                                                                                                                                                                                                                                                                                                                                                                                                                                                                                                                                                                                                                                                                                                                                                                                                                                                                                                                                                                                                                                                                                                                                                                                                                                                                                                                                                                                                                                                                                                                                                                                                                                                                                                                                                                                                                                                                                                                                                                                                                                                                                                                                                                                                                                                                                                                                                                                                                                                                                                                                                                                                                                                                                                                                                                                                                                                                                                                                                                                                                                                                                                                                                                                                                                                                                                                                                                                                                                                                                                                                                                                                                                                                                                                                                                                                                                                                                                                                                                                                                                                                                                                                                                                                                                                                                                                                                                                                                                                                                                                                                                                                                                                                                                                                                                                                                                                                                                                                                                                                                                                                                                                                                                                                                                                                                                                                                                                                                                                                                                                                                                                                                                                                                                                                                                                                                                                                                                                                                                                                                                                                                                                                                                                                                                                                                                                                                                                                                                                                                                                                                                                                                                                                                                                                                                                                                                                                                                                                                                                                                                                                                                                                                                                                                                                                                                                                                                                                                                                                                                                                                                                                                                                                                                                                                                                                                                                                                                                                                                                                                                                                                                                                                                                                                                                                                                                                                                                                                                                                                                                                                                                                                                                                                                                              | receptor signaling pathway via JAK-STAT                          |
|            | HUMAN HGNC=5575 UniProtKB=A0A0B4J1V2,HUMAN HGNC=5645 UniProtKB=A0A0C4DH34,HUMAN HGNC=5549 UniProtKB=A0A0C4DH31,HUMAN HGNC=5554 UniProtKB=P01743,HUMAN HGNC=5480 UniProtKB=P01880,HUMAN HGNC=5659 UniProtKB=A0A0C4DH38,HUMAN HGNC=5634 UniProtKB=A0A075B7F0,HUMAN HGNC=38476 UniProtKB=B9A064,HUMAN HGNC=1324 UniProtKB=P0C0L5,HUMAN HGNC=5861 UniProtKB=A0M8Q6,HUMAN HGNC=5647 UniProtKB=A0A087WSY4,HUMAN HGNC=5563 UniProtKB=A0A075B7D0,HUMAN HGNC=5856 UniProtKB=P0DOY2,HUMAN HGNC=2367 UniProtKB=P02741,HUMAN HGNC=5606 UniProtKB=P01763,HUMAN HGNC=5576 UniProtKB=P01817,HUMAN HGNC=5528 UniProtKB=P01861,HUMAN HGNC=5541 UniProtKB=P01871,HUMAN HGNC=5585 UniProtKB=A0A0C4DH32,HUMAN HGNC=5551 UniProtKB=A0A0C4DH33,HUMAN HGNC=5526 UniProtKB=P01859,HUMAN HGNC=5657 UniProtKB=P0DP08,HUMAN Ensembl=ENSG00000282639 UniProtKB=A0A0J9YX35,HUMAN Gene=HV309_HUMAN UniProtKB=P01782,HUMAN HGNC=5654 UniProtKB=P01825,HUMAN HGNC=5553 UniProtKB=A0A0A0MS14,HUMAN Gene=HV108_HUMAN UniProtKB=P0DP01,HUMAN HGNC=5624 UniProtKB=A0A0B4J1X5,HUMAN HGNC=5620 UniProtKB=P01780,HUMAN HGNC=5598 UniProtKB=A0A0C4DH35,HUMAN HGNC=5580 UniProtKB=P01762,HUMAN HGNC=5633 UniProtKB=A0A075B7D8,HUMAN HGNC=5582 UniProtKB=A0A0B4J1V0,HUMAN HGNC=5478 UniProtKB=P01876,HUMAN HGNC=5617 UniProtKB=A0A075B6Q5,HUMAN HGNC=5594 UniProtKB=P0DP03,HUMAN HGNC=5655 UniProtKB=A0A0C4DH41,HUMAN HGNC=5636 UniProtKB=A0A075B7B8,HUMAN HGNC=5586 UniProtKB=A0A0B4J1V1,HUMAN HGNC=5581 UniProtKB=P01766,HUMAN HGNC=5622 UniProtKB=A0A0B4J1Y9,HUMAN HGNC=5652 UniProtKB=A0A075B6R2,HUMAN HGNC=5593 UniProtKB=P0DP02,HUMAN HGNC=5479 UniProtKB=P01877,HUMAN HGNC=5619 UniProtKB=A0A0C4DH42,HUMAN HGNC=5596 UniProtKB=P01772,HUMAN HGNC=5550 UniProtKB=P23083,HUMAN HGNC=5604 UniProtKB=A0A0B4J1X8,HUMAN HGNC=5597 UniProtKB=A0A0B4J1Y8,HUMAN HGNC=5592 UniProtKB=A0A0B4J1Y7,HUMAN HGNC=5595 UniProtKB=A0A0B4J1Y6,HUMAN HGNC=5594 UniProtKB=A0A0B4J1Y5,HUMAN HGNC=5593 UniProtKB=A0A0B4J1Y4,HUMAN HGNC=5592 UniProtKB=A0A0B4J1Y3,HUMAN HGNC=5591 UniProtKB=A0A0B4J1Y2,HUMAN HGNC=5590 UniProtKB=A0A0B4J1Y1,HUMAN HGNC=5589 UniProtKB=A0A0B4J1Y0,HUMAN HGNC=5588 UniProtKB=A0A0B4J1X9,HUMAN HGNC=5587 UniProtKB=A0A0B4J1X8,HUMAN HGNC=5586 UniProtKB=A0A0B4J1X7,HUMAN HGNC=5585 UniProtKB=A0A0B4J1X6,HUMAN HGNC=5584 UniProtKB=A0A0B4J1X5,HUMAN HGNC=5583 UniProtKB=A0A0B4J1X4,HUMAN HGNC=5582 UniProtKB=A0A0B4J1X3,HUMAN HGNC=5581 UniProtKB=A0A0B4J1X2,HUMAN HGNC=5580 UniProtKB=A0A0B4J1X1,HUMAN HGNC=5579 UniProtKB=A0A0B4J1X0,HUMAN HGNC=5578 UniProtKB=A0A0B4J1W9,HUMAN HGNC=5577 UniProtKB=A0A0B4J1W8,HUMAN HGNC=5576 UniProtKB=A0A0B4J1W7,HUMAN HGNC=5575 UniProtKB=A0A0B4J1W6,HUMAN HGNC=5574 UniProtKB=A0A0B4J1W5,HUMAN HGNC=5573 UniProtKB=A0A0B4J1W4,HUMAN HGNC=5572 UniProtKB=A0A0B4J1W3,HUMAN HGNC=5571 UniProtKB=A0A0B4J1W2,HUMAN HGNC=5570 UniProtKB=A0A0B4J1W1,HUMAN HGNC=5569 UniProtKB=A0A0B4J1W0,HUMAN HGNC=5568 UniProtKB=A0A0B4J1V9,HUMAN HGNC=5567 UniProtKB=A0A0B4J1V8,HUMAN HGNC=5566 UniProtKB=A0A0B4J1V7,HUMAN HGNC=5565 UniProtKB=A0A0B4J1V6,HUMAN HGNC=5564 UniProtKB=A0A0B4J1V5,HUMAN HGNC=5563 UniProtKB=A0A0B4J1V4,HUMAN HGNC=5562 UniProtKB=A0A0B4J1V3,HUMAN HGNC=5561 UniProtKB=A0A0B4J1V2,HUMAN HGNC=5560 UniProtKB=A0A0B4J1V1,HUMAN HGNC=5559 UniProtKB=A0A0B4J1V0,HUMAN HGNC=5558 UniProtKB=A0A0B4J1U9,HUMAN HGNC=5557 UniProtKB=A0A0B4J1U8,HUMAN HGNC=5556 UniProtKB=A0A0B4J1U7,HUMAN HGNC=5555 UniProtKB=A0A0B4J1U6,HUMAN HGNC=5554 UniProtKB=A0A0B4J1U5,HUMAN HGNC=5553 UniProtKB=A0A0B4J1U4,HUMAN HGNC=5552 UniProtKB=A0A0B4J1U3,HUMAN HGNC=5551 UniProtKB=A0A0B4J1U2,HUMAN HGNC=5550 UniProtKB=A0A0B4J1U1,HUMAN HGNC=5549 UniProtKB=A0A0B4J1U0,HUMAN HGNC=5548 UniProtKB=A0A0B4J1T9,HUMAN HGNC=5547 UniProtKB=A0A0B4J1T8,HUMAN HGNC=5546 UniProtKB=A0A0B4J1T7,HUMAN HGNC=5545 UniProtKB=A0A0B4J1T6,HUMAN HGNC=5544 UniProtKB=A0A0B4J1T5,HUMAN HGNC=5543 UniProtKB=A0A0B4J1T4,HUMAN HGNC=5542 UniProtKB=A0A0B4J1T3,HUMAN HGNC=5541 UniProtKB=A0A0B4J1T2,HUMAN HGNC=5540 UniProtKB=A0A0B4J1T1,HUMAN HGNC=5539 UniProtKB=A0A0B4J1T0,HUMAN HGNC=5538 UniProtKB=A0A0B4J1S9,HUMAN HGNC=5537 UniProtKB=A0A0B4J1S8,HUMAN HGNC=5536 UniProtKB=A0A0B4J1S7,HUMAN HGNC=5535 UniProtKB=A0A0B4J1S6,HUMAN HGNC=5534 UniProtKB=A0A0B4J1S5,HUMAN HGNC=5533 UniProtKB=A0A0B4J1S4,HUMAN HGNC=5532 UniProtKB=A0A0B4J1S3,HUMAN HGNC=5531 UniProtKB=A0A0B4J1S2,HUMAN HGNC=5530 UniProtKB=A0A0B4J1S1,HUMAN HGNC=5529 UniProtKB=A0A0B4J1S0,HUMAN HGNC=5528 UniProtKB=A0A0B4J1R9,HUMAN HGNC=5527 UniProtKB=A0A0B4J1R8,HUMAN HGNC=5526 UniProtKB=A0A0B4J1R7,HUMAN HGNC=5525 UniProtKB=A0A0B4J1R6,HUMAN HGNC=5524 UniProtKB=A0A0B4J1R5,HUMAN HGNC=5523 UniProtKB=A0A0B4J1R4,HUMAN HGNC=5522 UniProtKB=A0A0B4J1R3,HUMAN HGNC=5521 UniProtKB=A0A0B4J1R2,HUMAN HGNC=5520 UniProtKB=A0A0B4J1R1,HUMAN HGNC=5519 UniProtKB=A0A0B4J1R0,HUMAN HGNC=5518 UniProtKB=A0A0B4J1Q9,HUMAN HGNC=5517 UniProtKB=A0A0B4J1Q8,HUMAN HGNC=5516 UniProtKB=A0A0B4J1Q7,HUMAN HGNC=5515 UniProtKB=A0A0B4J1Q6,HUMAN HGNC=5514 UniProtKB=A0A0B4J1Q5,HUMAN HGNC=5513 UniProtKB=A0A0B4J1Q4,HUMAN HGNC=5512 UniProtKB=A0A0B4J1Q3,HUMAN HGNC=5511 UniProtKB=A0A0B4J1Q2,HUMAN HGNC=5510 UniProtKB=A0A0B4J1Q1,HUMAN HGNC=5509 UniProtKB=A0A0B4J1Q0,HUMAN HGNC=5508 UniProtKB=A0A0B4J1P9,HUMAN HGNC=5507 UniProtKB=A0A0B4J1P8,HUMAN HGNC=5506 UniProtKB=A0A0B4J1P7,HUMAN HGNC=5505 UniProtKB=A0A0B4J1P6,HUMAN HGNC=5504 UniProtKB=A0A0B4J1P5,HUMAN HGNC=5503 UniProtKB=A0A0B4J1P4,HUMAN HGNC=5502 UniProtKB=A0A0B4J1P3,HUMAN HGNC=5501 UniProtKB=A0A0B4J1P2,HUMAN HGNC=5500 UniProtKB=A0A0B4J1P1,HUMAN HGNC=5499 UniProtKB=A0A0B4J1P0,HUMAN HGNC=5498 UniProtKB=A0A0B4J1O9,HUMAN HGNC=5497 UniProtKB=A0A0B4J1O8,HUMAN HGNC=5496 UniProtKB=A0A0B4J1O7,HUMAN HGNC=5495 UniProtKB=A0A0B4J1O6,HUMAN HGNC=5494 UniProtKB=A0A0B4J1O5,HUMAN HGNC=5493 UniProtKB=A0A0B4J1O4,HUMAN HGNC=5492 UniProtKB=A0A0B4J1O3,HUMAN HGNC=5491 UniProtKB=A0A0B4J1O2,HUMAN HGNC=5490 UniProtKB=A0A0B4J1O1,HUMAN HGNC=5489 UniProtKB=A0A0B4J1O0,HUMAN HGNC=5488 UniProtKB=A0A0B4J1N9,HUMAN HGNC=5487 UniProtKB=A0A0B4J1N8,HUMAN HGNC=5486 UniProtKB=A0A0B4J1N7,HUMAN HGNC=5485 UniProtKB=A0A0B4J1N6,HUMAN HGNC=5484 UniProtKB=A0A0B4J1N5,HUMAN HGNC=5483 UniProtKB=A0A0B4J1N4,HUMAN HGNC=5482 UniProtKB=A0A0B4J1N3,HUMAN HGNC=5481 UniProtKB=A0A0B4J1N2,HUMAN HGNC=5480 UniProtKB=A0A0B4J1N1,HUMAN HGNC=5479 UniProtKB=A0A0B4J1N0,HUMAN HGNC=5478 UniProtKB=A0A0B4J1M9,HUMAN HGNC=5477 UniProtKB=A0A0B4J1M8,HUMAN HGNC=5476 UniProtKB=A0A0B4J1M7,HUMAN HGNC=5475 UniProtKB=A0A0B4J1M6,HUMAN HGNC=5474 UniProtKB=A0A0B4J1M5,HUMAN HGNC=5473 UniProtKB=A0A0B4J1M4,HUMAN HGNC=5472 UniProtKB=A0A0B4J1M3,HUMAN HGNC=5471 UniProtKB=A0A0B4J1M2,HUMAN HGNC=5470 UniProtKB=A0A0B4J1M1,HUMAN HGNC=5469 UniProtKB=A0A0B4J1M0,HUMAN HGNC=5468 UniProtKB=A0A0B4J1L9,HUMAN HGNC=5467 UniProtKB=A0A0B4J1L8,HUMAN HGNC=5466 UniProtKB=A0A0B4J1L7,HUMAN HGNC=5465 UniProtKB=A0A0B4J1L6,HUMAN HGNC=5464 UniProtKB=A0A0B4J1L5,HUMAN HGNC=5463 UniProtKB=A0A0B4J1L4,HUMAN HGNC=5462 UniProtKB=A0A0B4J1L3,HUMAN HGNC=5461 UniProtKB=A0A0B4J1L2,HUMAN HGNC=5460 UniProtKB=A0A0B4J1L1,HUMAN HGNC=5459 UniProtKB=A0A0B4J1L0,HUMAN HGNC=5458 UniProtKB=A0A0B4J1K9,HUMAN HGNC=5457 UniProtKB=A0A0B4J1K8,HUMAN HGNC=5456 UniProtKB=A0A0B4J1K7,HUMAN HGNC=5455 UniProtKB=A0A0B4J1K6,HUMAN HGNC=5454 UniProtKB=A0A0B4J1K5,HUMAN HGNC=5453 UniProtKB=A0A0B4J1K4,HUMAN HGNC=5452 UniProtKB=A0A0B4J1K3,HUMAN HGNC=5451 UniProtKB=A0A0B4J1K2,HUMAN HGNC=5450 UniProtKB=A0A0B4J1K1,HUMAN HGNC=5449 UniProtKB=A0A0B4J1K0,HUMAN HGNC=5448 UniProtKB=A0A0B4J1J9,HUMAN HGNC=5447 UniProtKB=A0A0B4J1J8,HUMAN HGNC=5446 UniProtKB=A0A0B4J1J7,HUMAN HGNC=5445 UniProtKB=A0A0B4J1J6,HUMAN HGNC=5444 UniProtKB=A0A0B4J1J5,HUMAN HGNC=5443 UniProtKB=A0A0B4J1J4,HUMAN HGNC=5442 UniProtKB=A0A0B4J1J3,HUMAN HGNC=5441 UniProtKB=A0A0B4J1J2,HUMAN HGNC=5440 UniProtKB=A0A0B4J1J1,HUMAN HGNC=5439 UniProtKB=A0A0B4J1J0,HUMAN HGNC=5438 UniProtKB=A0A0B4J1I9,HUMAN HGNC=5437 UniProtKB=A0A0B4J1I8,HUMAN HGNC=5436 UniProtKB=A0A0B4J1I7,HUMAN HGNC=5435 UniProtKB=A0A0B4J1I6,HUMAN HGNC=5434 UniProtKB=A0A0B4J1I5,HUMAN HGNC=5433 UniProtKB=A0A0B4J1I4,HUMAN HGNC=5432 UniProtKB=A0A0B4J1I3,HUMAN HGNC=5431 UniProtKB=A0A0B4J1I2,HUMAN HGNC=5430 UniProtKB=A0A0B4J1I1,HUMAN HGNC=5429 UniProtKB=A0A0B4J1I0,HUMAN HGNC=5428 UniProtKB=A0A0B4J1H9,HUMAN HGNC=5427 UniProtKB=A0A0B4J1H8,HUMAN HGNC=5426 UniProtKB=A0A0B4J1H7,HUMAN HGNC=5425 UniProtKB=A0A0B4J1H6,HUMAN HGNC=5424 UniProtKB=A0A0B4J1H5,HUMAN HGNC=5423 UniProtKB=A0A0B4J1H4,HUMAN HGNC=5422 UniProtKB=A0A0B4J1H3,HUMAN HGNC=5421 UniProtKB=A0A0B4J1H2,HUMAN HGNC=5420 UniProtKB=A0A0B4J1H1,HUMAN HGNC=5419 UniProtKB=A0A0B4J1H0,HUMAN HGNC=5418 UniProtKB=A0A0B4J1G9,HUMAN HGNC=5417 UniProtKB=A0A0B4J1G8,HUMAN HGNC=5416 UniProtKB=A0A0B4J1G7,HUMAN HGNC=5415 UniProtKB=A0A0B4J1G6,HUMAN HGNC=5414 UniProtKB=A0A0B4J1G5,HUMAN HGNC=5413 UniProtKB=A0A0B4J1G4,HUMAN HGNC=5412 UniProtKB=A0A0B4J1G3,HUMAN HGNC=5411 UniProtKB=A0A0B4J1G2,HUMAN HGNC=5410 UniProtKB=A0A0B4J1G1,HUMAN HGNC=5409 UniProtKB=A0A0B4J1G0,HUMAN HGNC=5408 UniProtKB=A0A0B4J1F9,HUMAN HGNC=5407 UniProtKB=A0A0B4J1F8,HUMAN HGNC=5406 UniProtKB=A0A0B4J1F7,HUMAN HGNC=5405 UniProtKB=A0A0B4J1F6,HUMAN HGNC=5404 UniProtKB=A0A0B4J1F5,HUMAN HGNC=5403 UniProtKB=A0A0B4J1F4,HUMAN HGNC=5402 UniProtKB=A0A0B4J1F3,HUMAN HGNC=5401 UniProtKB=A0A0B4J1F2,HUMAN HGNC=5400 UniProtKB=A0A0B4J1F1,HUMAN HGNC=5399 UniProtKB=A0A0B4J1F0,HUMAN HGNC=5398 UniProtKB=A0A0B4J1E9,HUMAN HGNC=5397 UniProtKB=A0A0B4J1E8,HUMAN HGNC=5396 UniProtKB=A0A0B4J1E7,HUMAN HGNC=5395 UniProtKB=A0A0B4J1E6,HUMAN HGNC=5394 UniProtKB=A0A0B4J1E5,HUMAN HGNC=5393 UniProtKB=A0A0B4J1E4,HUMAN HGNC=5392 UniProtKB=A0A0B4J1E3,HUMAN HGNC=5391 UniProtKB=A0A0B4J1E2,HUMAN HGNC=5390 UniProtKB=A0A0B4J1E1,HUMAN HGNC=5389 UniProtKB=A0A0B4J1E0,HUMAN HGNC=5388 UniProtKB=A0A0B4J1D9,HUMAN HGNC=5387 UniProtKB=A0A0B4J1D8,HUMAN HGNC=5386 UniProtKB=A0A0B4J1D7,HUMAN HGNC=5385 UniProtKB=A0A0B4J1D6,HUMAN HGNC=5384 UniProtKB=A0A0B4J1D5,HUMAN HGNC=5383 UniProtKB=A0A0B4J1D4,HUMAN HGNC=5382 UniProtKB=A0A0B4J1D3,HUMAN HGNC=5381 UniProtKB=A0A0B4J1D2,HUMAN HGNC=5380 UniProtKB=A0A0B4J1D1,HUMAN HGNC=5379 UniProtKB=A0A0B4J1D0,HUMAN HGNC=5378 UniProtKB=A0A0B4J1C9,HUMAN HGNC=5377 UniProtKB=A0A0B4J1C8,HUMAN HGNC=5376 UniProtKB=A0A0B4J1C7,HUMAN HGNC=5375 UniProtKB=A0A0B4J1C6,HUMAN HGNC=5374 UniProtKB=A0A0B4J1C5,HUMAN HGNC=5373 UniProtKB=A0A0B4J1C4,HUMAN HGNC=5372 UniProtKB=A0A0B4J1C3,HUMAN HGNC=5371 UniProtKB=A0A0B4J1C2,HUMAN HGNC=5370 UniProtKB=A0A0B4J1C1,HUMAN HGNC=5369 UniProtKB=A0A0B4J1C0,HUMAN HGNC=5368 UniProtKB=A0A0B4J1B9,HUMAN HGNC=5367 UniProtKB=A0A0B4J1B8,HUMAN HGNC=5366 UniProtKB=A0A0B4J1B7,HUMAN HGNC=5365 UniProtKB=A0A0B4J1B6,HUMAN HGNC=5364 UniProtKB=A0A0B4J1B5,HUMAN HGNC=5363 UniProtKB=A0A0B4J1B4,HUMAN HGNC=5362 UniProtKB=A0A0B4J1B3,HUMAN HGNC=5361 UniProtKB=A0A0B4J1B2,HUMAN HGNC=5360 UniProtKB=A0A0B4J1B1,HUMAN HGNC=5359 UniProtKB=A0A0B4J1B0,HUMAN HGNC=5358 UniProtKB=A0A0B4J1A9,HUMAN HGNC=5357 UniProtKB=A0A0B4J1A8,HUMAN HGNC=5356 UniProtKB=A0A0B4J1A7,HUMAN HGNC=5355 UniProtKB=A0A0B4J1A6,HUMAN HGNC=5354 UniProtKB=A0A0B4J1A5,HUMAN HGNC=5353 UniProtKB=A0A0B4J1A4,HUMAN HGNC=5352 UniProtKB=A0A0B4J1A3,HUMAN HGNC=5351 UniProtKB=A0A0B4J1A2,HUMAN HGNC=5350 UniProtKB=A0A0B4J1A1,HUMAN HGNC=5349 UniProtKB=A0A0B4J1A0,HUMAN HGNC=5348 UniProtKB=A0A0B4J1Z9,HUMAN HGNC=5347 UniProtKB=A0A0B4J1Z8,HUMAN HGNC=5346 UniProtKB=A0A0B4J1Z7,HUMAN HGNC=5345 UniProtKB=A0A0B4J1Z6,HUMAN HGNC=5344 UniProtKB=A0A0B4J1Z5,HUMAN HGNC=5343 UniProtKB=A0A0B4J1Z4,HUMAN HGNC=5342 UniProtKB=A0A0B4J1Z3,HUMAN HGNC=5341 UniProtKB=A0A0B4J1Z2,HUMAN HGNC=5340 UniProtKB=A0A0B4J1Z1,HUMAN HGNC=5339 UniProtKB=A0A0B4J1Z0,HUMAN HGNC=5338 UniProtKB=A0A0B4J1Y9,HUMAN HGNC=5337 UniProtKB=A0A0B4J1Y8,HUMAN HGNC=5336 UniProtKB=A0A0B4J1Y7,HUMAN HGNC=5335 UniProtKB=A0A0B4J1Y6,HUMAN HGNC=5334 UniProtKB=A0A0B4J1Y5,HUMAN HGNC=5333 UniProtKB=A0A0B4J1Y4,HUMAN HGNC=5332 UniProtKB=A0A0B4J1Y3,HUMAN HGNC=5331 UniProtKB=A0A0B4J1Y2,HUMAN HGNC=5330 UniProtKB=A0A0B4J1Y1,HUMAN HGNC=5329 UniProtKB=A0A0B4J1Y0,HUMAN HGNC=5328 UniProtKB=A0A0B4J1X9,HUMAN HGNC=5327 UniProtKB=A0A0B4J1X8,HUMAN HGNC=5326 UniProtKB=A0A0B4J1X7,HUMAN HGNC=5325 UniProtKB=A0A0B4J1X6,HUMAN HGNC=5324 UniProtKB=A0A0B4J1X5,HUMAN HGNC=5323 UniProtKB=A0A0B4J1X4,HUMAN HGNC=5322 UniProtKB=A0A0B4J1X3,HUMAN HGNC=5321 UniProtKB=A0A0B4J1X2,HUMAN HGNC=5320 UniProtKB=A0A0B4J1X1,HUMAN HGNC=5319 UniProtKB=A0A0B4J1X0,HUMAN HGNC=5318 UniProtKB=A0A0B4J1W9,HUMAN HGNC=5317 UniProtKB=A0A0B4J1W8,HUMAN HGNC=5316 UniProtKB=A0A0B4J1W7,HUMAN HGNC=5315 UniProtKB=A0A0B4J1W6,HUMAN HGNC=5314 UniProtKB=A0A0B4J1W5,HUMAN HGNC=5313 UniProtKB=A0A0B4J1W4,HUMAN HGNC=5312 UniProtKB=A0A0B4J1W3,HUMAN HGNC=5311 UniProtKB=A0A0B4J1W2,HUMAN HGNC=5310 UniProtKB=A0A0B4J1W1,HUMAN HGNC=5309 UniProtKB=A0A0B4J1W0,HUMAN HGNC=5308 UniProtKB=A0A0B4J1V9,HUMAN HGNC=5307 UniProtKB=A0A0B4J1V8,HUMAN HGNC=5306 UniProtKB=A0A0B4J1V7,HUMAN HGNC=5305 UniProtKB=A0A0B4J1V6,HUMAN HGNC=5304 UniProtKB=A0A0B4J1V5,HUMAN HGNC=5303 UniProtKB=A0A0B4J1V4,HUMAN HGNC=5302 UniProtKB=A0A0B4J1V3,HUMAN HGNC=5301 UniProtKB=A0A0B4J1V2,HUMAN HGNC=5300 UniProtKB=A0A0B4J1V1,HUMAN HGNC=5299 UniProtKB=A0A0B4J1V0,HUMAN HGNC=5298 UniProtKB=A0A0B4J1U9,HUMAN HGNC=5297 UniProtKB=A0A0B4J1U8,HUMAN HGNC=5296 UniProtKB=A0A0B4J1U7,HUMAN HGNC=5295 UniProtKB=A0A0B4J1U6,HUMAN HGNC=5294 UniProtKB=A0A0B4J1U5,HUMAN HGNC=5293 UniProtKB=A0A0B4J1U4,HUMAN HGNC=5292 UniProtKB=A0A0B4J1U3,HUMAN HGNC=5291 UniProtKB=A0A0B4J1U2,HUMAN HGNC=5290 UniProtKB=A0A0B4J1U1,HUMAN HGNC=5289 UniProtKB=A0A0B4J1U0,HUMAN HGNC=5288 UniProtKB=A0A0B4J1T9,HUMAN HGNC=5287 UniProtKB=A0A0B4J1T8,HUMAN HGNC=5286 UniProtKB=A0A0B4J1T7,HUMAN HGNC=5285 UniProtKB=A0A0B4J1T6,HUMAN HGNC=5284 UniProtKB=A0A0B4J1T5,HUMAN HGNC=5283 UniProtKB=A0A0B4J1T4,HUMAN HGNC=5282 UniProtKB=A0A0B4J1T3,HUMAN HGNC=5281 UniProtKB=A0A0B4J1T2,HUMAN HGNC=5280 UniProtKB=A0A0B4J1T1,HUMAN HGNC=5279 UniProtKB=A0A0B4J1T0,HUMAN HGNC=5278 UniProtKB=A0A0B4J1S9,HUMAN HGNC=5277 UniProtKB=A0A0B4J1S8,HUMAN HGNC=5276 UniProtKB=A0A0B4J1S7,HUMAN HGNC=5275 UniProtKB=A0A0B4J1S6,HUMAN HGNC=5274 UniProtKB=A0A0B4J1S5,HUMAN HGNC=5273 UniProtKB=A0A0B4J1S4,HUMAN HGNC=5272 UniProtKB=A0A0B4J1S3,HUMAN HGNC=5271 UniProtKB=A0A0B4J1S2,HUMAN HGNC=5270 UniProtKB=A0A0B4J1S1,HUMAN HGNC=5269 UniProtKB=A0A0B4J1S0,HUMAN HGNC=5268 UniProtKB=A0A0B4J1R9,HUMAN HGNC=5267 UniProtKB=A0A0B4J1R8,HUMAN HGNC=5266 UniProtKB=A0A0B4J1R7,HUMAN HGNC=5265 UniProtKB=A0A0B4J1R6,HUMAN HGNC=5264 UniProtKB=A0A0B4J1R5,HUMAN HGNC=5263 UniProtKB=A0A0B4J1R4,HUMAN HGNC=5262 UniProtKB=A0A0B4J1R3,HUMAN HGNC=5261 UniProtKB=A0A0B4J1R2,HUMAN HGNC=5260 UniProtKB=A0A0B4J1R1,HUMAN HGNC=5259 UniProtKB=A0A0B4J1R0,HUMAN HGNC=5258 UniProtKB=A0A0B4J1Q9,HUMAN HGNC=5257 UniProtKB=A0A0B4J1Q8,HUMAN HGNC=5256 UniProtKB=A0A0B4J1Q7,HUMAN HGNC=5255 UniProtKB=A0A0B4J1Q6,HUMAN HGNC=5254 UniProtKB=A0A0B4J1Q5,HUMAN HGNC=5253 UniProtKB=A0A0B4J1Q4,HUMAN HGNC=5252 UniProtKB=A0A0B4J1Q3,HUMAN HGNC=5251 UniProtKB=A0A0B4J1Q2,HUMAN HGNC=5250 UniProtKB=A0A0B4J1Q1,HUMAN HGNC=5249 UniProtKB=A0A0B4J1Q0,HUMAN HGNC=5248 UniProtKB=A0A0B4J1P9,HUMAN HGNC=5247 UniProtKB=A0A0B4J1P8,HUMAN HGNC=5246 UniProtKB=A0A0B4J1P7,HUMAN HGNC=5245 UniProtKB=A0A0B4J1P6,HUMAN HGNC=5244 UniProtKB=A0A0B4J1P5,HUMAN HGNC=5243 UniProtKB=A0A0B4J1P4,HUMAN HGNC=5242 UniProtKB=A0A0B4J1P3,HUMAN HGNC=5241 UniProtKB=A0A0B4J1P2,HUMAN HGNC=5240 UniProtKB=A0A0B4J1P1,HUMAN HGNC=5239 UniProtKB=A0A0B4J1P0,HUMAN HGNC=5238 UniProtKB=A0A0B4J1O9,HUMAN HGNC=5237 UniProtKB=A0A0B4J1O8,HUMAN HGNC=5236 UniProtKB=A0A0B4J1O7,HUMAN HGNC=5235 UniProtKB=A0A0B4J1O6,HUMAN HGNC=5234 UniProtKB=A0A0B4J1O5,HUMAN HGNC=5233 UniProtKB=A0A0B4J1O4,HUMAN HGNC=5232 UniProtKB=A0A0B4J1O3,HUMAN HGNC=5231 UniProtKB=A0A0B4J1O2,HUMAN HGNC=5230 UniProtKB=A0A0B4J1O1,HUMAN HGNC=5229 UniProtKB=A0A0B4J1O0,HUMAN HGNC=5228 UniProtKB=A0A0B4J1N9,HUMAN HGNC=5227 UniProtKB=A0A0B4J1N8,HUMAN HGNC=5226 UniProtKB=A0A0B4J1N7,HUMAN HGNC=5225 UniProtKB=A0A0B4J1N6,HUMAN HGNC=5224 UniProtKB=A0A0B4J1N5,HUMAN HGNC=5223 UniProtKB=A0A0B4J1N4,HUMAN HGNC=5222 UniProtKB=A0A0B4J1N3,HUMAN HGNC=5221 UniProtKB=A0A0B4J1N2,HUMAN HGNC=5220 UniProtKB=A0A0B4J1N1,HUMAN HGNC=5219 UniProtKB=A0A0B4J1N0,HUMAN HGNC=5218 UniProtKB=A0A0B4J1M9,HUMAN HGNC=5217 UniProtKB=A0A0B4J1M8,HUMAN HGNC=5216 UniProtKB=A0A0B4J1M7,HUMAN HGNC=5215 UniProtKB=A0A0B4J1M6,HUMAN HGNC=5214 UniProtKB=A0A0B4J1M5,HUMAN HGNC=5213 UniProtKB=A0A0B4J1M4,HUMAN HGNC=5212 UniProtKB=A0A0B4J1M3,HUMAN HGNC=5211 UniProtKB=A0A0B4J1M2,HUMAN HGNC=5210 UniProtKB=A0A0B4J1M1,HUMAN HGNC=5209 UniProtKB=A0A0B4J1M0,HUMAN HGNC=5208 UniProtKB=A0A0B4J1L9,HUMAN HGNC=5207 UniProtKB=A0A0B4J1L8,HUMAN HGNC=5206 UniProtKB=A0A0B4J1L7,HUMAN HGNC=5205 UniProtKB=A0A0B4J1L6,HUMAN HGNC=5204 UniProtKB=A0A0B4J1L5,HUMAN HGNC=5203 UniProtKB=A0A0B4J1L4,HUMAN HGNC=5202 UniProtKB=A0A0B4J1L3,HUMAN HGNC=5201 UniProtKB=A0A0B4J1L2,HUMAN HGNC=5200 UniProtKB=A0A0B4J1L1,HUMAN HGNC=5199 UniProtKB=A0A0B4J1L0,HUMAN HGNC=5198 UniProtKB=A0A0B4J1K9,HUMAN HGNC=5197 UniProtKB=A0A0B4J1K8,HUMAN HGNC=5196 UniProtKB=A0A0B4J1K7,HUMAN HGNC=5195 UniProtKB=A0A0B4J1K6,HUMAN HGNC=5194 UniProtKB=A0A0B4J1K5,HUMAN HGNC=5193 UniProtKB=A0A0B4J1K4,HUMAN HGNC=5192 UniProtKB=A0A0B4J1K3,HUMAN HGNC=5191 UniProtKB=A0A0B4J1K2,HUMAN HGNC=5190 UniProtKB=A0A0B4J1K1,HUMAN HGNC=5189 UniProtKB=A0A0B4J1K0,HUMAN HGNC=5188 UniProtKB=A0A0B4J1J9,HUMAN HGNC=5187 UniProtKB=A0A0B4J1J8,HUMAN HGNC=5186 UniProtKB=A0A0B4J1J7,HUMAN HGNC=5185 UniProtKB=A0A0B4J1J6,HUMAN HGNC=5184 UniProtKB=A0A0B4J1J5,HUMAN HGNC=5183 UniProtKB=A0A0B4J1J4,HUMAN HGNC=5182 UniProtKB=A0A0B4J1J3,HUMAN HGNC=5181 UniProtKB=A0A0B4J1J2,HUMAN HGNC=5180 UniProtKB=A0A0B4J1J1,HUMAN HGNC=5179 UniProtKB=A0A0B4J1J0,HUMAN HGNC=5178 UniProtKB=A0A0B4J1I9,HUMAN HGNC=5177 UniProtKB=A0A0B4J1I8,HUMAN HGNC=5176 UniProtKB=A0A0B4J1I7,HUMAN HGNC=5175 UniProtKB=A0A0B4J1I6,HUMAN HGNC=5174 UniProtKB=A0A0B4J1I5,HUMAN HGNC=5173 UniProtKB=A0A0B4J1I4,HUMAN HGNC=5172 UniProtKB=A0A0B4J1I3,HUMAN HGNC=5171 UniProtKB=A0A0B4J1I2,HUMAN HGNC=5170 UniProtKB=A0A0B4J1I1,HUMAN HGNC=5169 UniProtKB=A0A0B4J1I0,HUMAN HGNC=5168 UniProtKB=A0A0B4J1H9,HUMAN HGNC=5167 UniProtKB=A0A0B4J1H8,HUMAN HGNC=5166 UniProtKB=A0A0B4J1H7,HUMAN HGNC=5165 UniProtKB=A0A0B4J1H6,HUMAN HGNC=5164 UniProtKB=A0A0B4J1H5,HUMAN HGNC=5163 UniProtKB=A0A0B4J1H4,HUMAN HGNC=5162 UniProtKB=A0A0B4J1H3,HUMAN HGNC=5161 UniProtKB=A0A0B4J1H2,HUMAN HGNC=5160 UniProtKB=A0A0B4J1H1,HUMAN HGNC=5159 UniProtKB=A0A0B4J1H0,HUMAN HGNC=5158 UniProtKB=A0A0B4J1G9,HUMAN HGNC=5157 UniProtKB=A0A0B4J1G8,HUMAN HGNC=5156 UniProtKB=A0A0B4J1G7,HUMAN HGNC=5155 UniProtKB=A0A0B4J1G6,HUMAN HGNC=5154 UniProtKB=A0A0B4J1G5,HUMAN HGNC=5153 UniProtKB=A0A0B4J1G4,HUMAN HGNC=5152 UniProtKB=A0A0B4J1G3 |                                                                  |

|            |                                                                                                                                                                                                                                                                                                                                                                  |                                                    |
|------------|------------------------------------------------------------------------------------------------------------------------------------------------------------------------------------------------------------------------------------------------------------------------------------------------------------------------------------------------------------------|----------------------------------------------------|
|            | MAN HGNC=5525 UniProtKB=P01857,HUMAN HGNC=5662 UniProtKB=A0A0B4J1U7,HUMAN HGNC=5601 UniProtKB=A0A0C4DH36,HUMAN HGNC=5716 UniProtKB=P01834,HUMAN HGNC=5588 UniProtKB=P01764,HUMAN HGNC=5857 UniProtKB=P0DOY3,HUMAN HGNC=5610 UniProtKB=P01767,HUMAN Ensembl=ENSG00000282150 UniProtKB=A0A0J9YY99,HUMAN HGNC=5527 UniProtKB=P01860,HUMAN HGNC=584 UniProtKB=P02743 |                                                    |
| GO:0022008 | HUMAN HGNC=13206 UniProtKB=O60296                                                                                                                                                                                                                                                                                                                                | neurogenesis                                       |
| GO:0001726 | HUMAN HGNC=11148 UniProtKB=Q16658                                                                                                                                                                                                                                                                                                                                | ruffle                                             |
| GO:0008198 | HUMAN HGNC=3951 UniProtKB=Q16595                                                                                                                                                                                                                                                                                                                                 | ferrous iron binding                               |
| GO:0008584 | HUMAN HGNC=199 UniProtKB=O43506                                                                                                                                                                                                                                                                                                                                  | male gonad development                             |
| GO:2000026 | HUMAN HGNC=3153 UniProtKB=Q16610                                                                                                                                                                                                                                                                                                                                 | regulation of multicellular organismal development |
|            | HUMAN HGNC=15720 UniProtKB=Q13033,HUMAN HGNC=11424 UniProtKB=O43815,HUMAN HGNC=1173 UniProtKB=Q5H9R7,HUMAN HGNC=5461 UniProtKB=P78318,HUMAN HGNC=9302 UniProtKB=P30153,HUMAN HGNC=6207 UniProtKB=P14923,HUMAN HGNC=14871 UniProtKB=Q96A00,HUMAN HGNC=9308 UniProtKB=Q15257,HUMAN HGNC=14952 UniProtKB=Q8TAE6,HUMAN HGNC=9304 UniProtKB=P63151                    | protein phosphatase binding                        |
| GO:0019903 | HUMAN HGNC=23151 UniProtKB=Q86UX7,HUMAN HGNC=3662 UniProtKB=P02675,HUMAN HGNC=6156 UniProtKB=P05106,HUMAN HGNC=6153 UniProtKB=P05556,HUMAN HGNC=6040 UniProtKB=Q13418                                                                                                                                                                                            | cell-matrix adhesion                               |
| GO:0007160 | HUMAN HGNC=2973 UniProtKB=O00429,HUMAN HGNC=17865 UniProtKB=Q96A26,HUMAN HGNC=1050 UniProtKB=P55957                                                                                                                                                                                                                                                              | regulation of mitochondrion organization           |
| GO:0010821 | HUMAN HGNC=3951 UniProtKB=Q16595,HUMAN HGNC=2295 UniProtKB=P00450                                                                                                                                                                                                                                                                                                | ferroxidase activity                               |
| GO:0004322 | HUMAN HGNC=6522 UniProtKB=P04180,HUMAN HGNC=2328 UniProtKB=P50416,HUMAN HGNC=94 UniProtKB=Q9BWD1                                                                                                                                                                                                                                                                 | acyltransferase                                    |
| PC00042    |                                                                                                                                                                                                                                                                                                                                                                  |                                                    |
| GO:0034453 | HUMAN HGNC=14906 UniProtKB=Q8N4C6                                                                                                                                                                                                                                                                                                                                | microtubule anchoring                              |
| GO:0051018 | HUMAN HGNC=369 UniProtKB=Q9UKA4                                                                                                                                                                                                                                                                                                                                  | protein kinase A binding                           |
| GO:0042098 | HUMAN HGNC=11491 UniProtKB=P43405,HUMAN HGNC=533 UniProtKB=P04083                                                                                                                                                                                                                                                                                                | T cell proliferation                               |
| GO:0015267 | HUMAN HGNC=4234 UniProtKB=P55040                                                                                                                                                                                                                                                                                                                                 | channel activity                                   |
| GO:0035335 | HUMAN HGNC=9645 UniProtKB=Q05209,HUMAN HGNC=29884 UniProtKB=Q8TF42                                                                                                                                                                                                                                                                                               | peptidyl-tyrosine dephosphorylation                |
| GO:1902476 | HUMAN HGNC=25240 UniProtKB=Q4KMQ2                                                                                                                                                                                                                                                                                                                                | chloride transmembrane transport                   |
| GO:0005681 | HUMAN HGNC=1743 UniProtKB=Q99459,HUMAN HGNC=24932 UniProtKB=Q9NZ63                                                                                                                                                                                                                                                                                               | spliceosomal complex                               |
|            | HUMAN HGNC=3300 UniProtKB=P63241,HUMAN HGNC=3250 UniProtKB=P47813,HUMAN HGNC=37237 UniProtKB=A6NDY0,HUMAN HGNC=3252 UniProtKB=O14602,HUMAN HGNC=3265 UniProtKB=P05198,HUMAN HGNC=9565 UniProtKB=P51665,HUMAN HGNC=30796 UniProtKB=Q9Y3F4,HUMAN Gene=EIF2S3L UniProt                                                                                              | translation initiation factor                      |
| PC00224    |                                                                                                                                                                                                                                                                                                                                                                  |                                                    |

|            |                                                                                                                                                                                                                                                                                                           |                                                                             |
|------------|-----------------------------------------------------------------------------------------------------------------------------------------------------------------------------------------------------------------------------------------------------------------------------------------------------------|-----------------------------------------------------------------------------|
|            | KB=Q2VIR3,HUMAN HGNC=3285 UniProtKB=P23588,HUMAN HGNC=3297 UniProtKB=P78344                                                                                                                                                                                                                               |                                                                             |
|            | HUMAN HGNC=2949 UniProtKB=Q8TD57,HUMAN HGNC=6325 UniProtKB=O60282,HUMAN HGNC=2951 UniProtKB=Q9C0G6,HUMAN HGNC=2713 UniProtKB=O75935,HUMAN HGNC=2952 UniProtKB=Q96JB1,HUMAN HGNC=2712 UniProtKB=Q13561,HUMAN HGNC=6317 UniProtKB=O43896,HUMAN HGNC=6387 UniProtKB=Q07866,HUMAN HGNC=17060 UniProtKB=Q92845 | microtubule binding motor protein                                           |
| PC00156    | HUMAN HGNC=4458 UniProtKB=P06744,HUMAN HGNC=4922 UniProtKB=P19367,HUMAN HGNC=11834 UniProtKB=P29401,HUMAN HGNC=8891 UniProtKB=P52209,HUMAN HGNC=8903 UniProtKB=Q95336                                                                                                                                     | glucose 6-phosphate metabolic process                                       |
| GO:0051156 |                                                                                                                                                                                                                                                                                                           |                                                                             |
| GO:0051607 | HUMAN HGNC=8087 UniProtKB=P29728                                                                                                                                                                                                                                                                          | defense response to virus                                                   |
| GO:0006622 |                                                                                                                                                                                                                                                                                                           | protein targeting to lysosome                                               |
| GO:1905368 | HUMAN HGNC=6501 UniProtKB=P13473                                                                                                                                                                                                                                                                          |                                                                             |
| GO:0051966 | HUMAN HGNC=26212 UniProtKB=P61009                                                                                                                                                                                                                                                                         | peptidase complex regulation of synaptic transmission, glutamatergic        |
| GO:0001889 | HUMAN HGNC=1406 UniProtKB=Q9Y698,HUMAN HGNC=15474 UniProtKB=Q9Y566,HUMAN HGNC=14294 UniProtKB=Q9BYB0                                                                                                                                                                                                      |                                                                             |
| GO:0005743 | HUMAN HGNC=533 UniProtKB=P04083                                                                                                                                                                                                                                                                           | liver development                                                           |
| GO:0005743 | HUMAN HGNC=5261 UniProtKB=P10809,HUMAN HGNC=7863 UniProtKB=Q13423                                                                                                                                                                                                                                         | mitochondrial inner membrane                                                |
| PC00104    | HUMAN HGNC=4298 UniProtKB=P16278                                                                                                                                                                                                                                                                          | galactosidase                                                               |
| PC00011    | HUMAN HGNC=20473 UniProtKB=Q9BX63                                                                                                                                                                                                                                                                         | DNA helicase                                                                |
| GO:0031532 | HUMAN HGNC=9070 UniProtKB=P08567,HUMAN HGNC=533 UniProtKB=P04083,HUMAN HGNC=14653 UniProtKB=Q9HBI1,HUMAN HGNC=15878 UniProtKB=Q9NQ75                                                                                                                                                                      | actin cytoskeleton reorganization                                           |
| GO:0019887 | HUMAN HGNC=9391 UniProtKB=P13861,HUMAN HGNC=9392 UniProtKB=P31323,HUMAN HGNC=9386 UniProtKB=Q9UGJ0                                                                                                                                                                                                        | protein kinase regulator activity                                           |
| GO:0032446 | HUMAN HGNC=21314 UniProtKB=Q8WXC6,HUMAN HGNC=20597 UniProtKB=P61960                                                                                                                                                                                                                                       | protein modification by small protein conjugation                           |
| GO:0006260 |                                                                                                                                                                                                                                                                                                           |                                                                             |
| GO:0051123 | HUMAN HGNC=26200 UniProtKB=Q9H668                                                                                                                                                                                                                                                                         | DNA replication                                                             |
| GO:0030136 | HUMAN HGNC=9553 UniProtKB=P62333,HUMAN HGNC=9552 UniProtKB=P62195,HUMAN HGNC=9551 UniProtKB=P43686                                                                                                                                                                                                        | RNA polymerase II preinitiation complex assembly                            |
| GO:0030136 | HUMAN HGNC=2092 UniProtKB=Q00610,HUMAN HGNC=13667 UniProtKB=Q9BXS5                                                                                                                                                                                                                                        | clathrin-coated vesicle                                                     |
|            | HUMAN HGNC=535 UniProtKB=P50995,HUMAN HGNC=537 UniProtKB=P07355,HUMAN HGNC=545 UniProtKB=P20073,HUMAN HGNC=544 UniProtKB=P08133,HUMAN HGNC=533 UniProtKB=P04083,HUMAN HGNC=543 UniProtKB=P08758,HUMAN HGNC=9449 UniProtKB=P04156                                                                          |                                                                             |
| PC00060    |                                                                                                                                                                                                                                                                                                           | calcium-binding protein positive regulation of transcription, DNA-templated |
| GO:0045893 | HUMAN HGNC=25758 UniProtKB=Q8TED0,HUMAN HGNC=12738 UniProtKB=Q969T9                                                                                                                                                                                                                                       |                                                                             |
|            | HUMAN HGNC=17780 UniProtKB=Q562R1,HUMAN HGNC=1117 UniProtKB=Q9UPA5,HUMAN HGNC=2974 UniProtKB=P50570,HUMAN HGNC=6317 UniProtKB=O43896,HUMAN HGNC=11510 UniProtKB=Q8N9I0,HUMAN HGNC=29125 UniProtKB=Q9UQ16,HUMAN HGNC=29557 UniProtKB=Q0ZGT2,HUMAN HGNC=10594 Uni                                           | axon                                                                        |
| GO:0030424 |                                                                                                                                                                                                                                                                                                           |                                                                             |

|           |                                                                                                                                                                                                                                                                                                                                                                                                                |                                        |
|-----------|----------------------------------------------------------------------------------------------------------------------------------------------------------------------------------------------------------------------------------------------------------------------------------------------------------------------------------------------------------------------------------------------------------------|----------------------------------------|
|           | ProtKB=Q01118,HUMAN HGNC=13406 UniProtKB=Q9Y6V0,HUMAN HGNC=10582 UniProtKB=Q9Y5Y9,HUMAN HGNC=11512 UniProtKB=Q9H2B2,HUMAN HGNC=6091 UniProtKB=P06213                                                                                                                                                                                                                                                           |                                        |
| GO:004825 |                                                                                                                                                                                                                                                                                                                                                                                                                |                                        |
| 5         | HUMAN HGNC=5048 UniProtKB=Q00839                                                                                                                                                                                                                                                                                                                                                                               | mRNA stabilization                     |
| GO:000245 |                                                                                                                                                                                                                                                                                                                                                                                                                |                                        |
| 6         | HUMAN HGNC=4932 UniProtKB=P01889                                                                                                                                                                                                                                                                                                                                                                               | T cell mediated immunity               |
| GO:000455 | HUMAN HGNC=363 UniProtKB=P27144,HUMAN HGNC=7850 UniProtKB=P22392,HUMAN HGNC=7849 UniProtKB=P15531                                                                                                                                                                                                                                                                                                              | nucleoside diphosphate kinase activity |
| GO:000588 | HUMAN HGNC=6891 UniProtKB=Q15555,HUMAN HGNC=6890 UniProtKB=Q15691                                                                                                                                                                                                                                                                                                                                              | cytoplasmic microtubule                |
| 1         | HUMAN HGNC=3338 UniProtKB=Q14247,HUMAN HGNC=2695 UniProtKB=Q16643,HUMAN HGNC=2696 UniProtKB=Q9UJU6,HUMAN HGNC=4844 UniProtKB=P14317                                                                                                                                                                                                                                                                            | regulation of synapse organization     |
| GO:005080 | HUMAN HGNC=6616 UniProtKB=P48059,HUMAN HGNC=6156 UniProtKB=P05106,HUMAN HGNC=4036 UniProtKB=O15117,HUMAN HGNC=13937 UniProtKB=O95866,HUMAN HGNC=13200 UniProtKB=Q15942,HUMAN HGNC=6153 UniProtKB=P05556,HUMAN HGNC=6040 UniProtKB=Q13418                                                                                                                                                                       | integrin-mediated signaling pathway    |
| GO:000722 | HUMAN HGNC=7863 UniProtKB=Q13423,HUMAN HGNC=5382 UniProtKB=O75874,HUMAN HGNC=11834 UniProtKB=P29401,HUMAN HGNC=5383 UniProtKB=P48735,HUMAN HGNC=8891 UniProtKB=P52209,HUMAN HGNC=8903 UniProtKB=O95336                                                                                                                                                                                                         | NADP metabolic process                 |
| GO:000673 | HUMAN HGNC=4116 UniProtKB=Q14376,HUMAN HGNC=4458 UniProtKB=P06744,HUMAN HGNC=30167 UniProtKB=P13667,HUMAN HGNC=9959 UniProtKB=P51606,HUMAN HGNC=12009 UniProtKB=P60174,HUMAN HGNC=8548 UniProtKB=P07237,HUMAN HGNC=9308 UniProtKB=Q15257,HUMAN HGNC=9261 UniProtKB=Q13356,HUMAN HGNC=9756 UniProtKB=O00391,HUMAN HGNC=8988 UniProtKB=Q13526,HUMAN HGNC=4606 UniProtKB=P30101,HUMAN HGNC=18144 UniProtKB=Q8IZU8 | isomerase activity                     |
| GO:001685 |                                                                                                                                                                                                                                                                                                                                                                                                                |                                        |
| 3         |                                                                                                                                                                                                                                                                                                                                                                                                                |                                        |
| GO:000825 |                                                                                                                                                                                                                                                                                                                                                                                                                |                                        |
| 3         | HUMAN HGNC=17820 UniProtKB=Q9H0P0                                                                                                                                                                                                                                                                                                                                                                              | 5'-nucleotidase activity               |
|           | HUMAN HGNC=5261 UniProtKB=P10809,HUMAN HGNC=7183 UniProtKB=P41218,HUMAN HGNC=533 UniProtKB=P04083,HUMAN HGNC=1628 UniProtKB=P08571,HUMAN HGNC=16961 UniProtKB=Q15762                                                                                                                                                                                                                                           |                                        |
| GO:000181 |                                                                                                                                                                                                                                                                                                                                                                                                                | cytokine production                    |
| 6         |                                                                                                                                                                                                                                                                                                                                                                                                                | negative regulation of                 |
| GO:003193 | HUMAN HGNC=4716 UniProtKB=P16403,HUMAN HGNC=4718 UniProtKB=P10412,HUMAN HGNC=4719 UniProtKB=P16401                                                                                                                                                                                                                                                                                                             | chromatin silencing                    |
| 6         |                                                                                                                                                                                                                                                                                                                                                                                                                | negative regulation of                 |
|           |                                                                                                                                                                                                                                                                                                                                                                                                                | transcription, DNA-                    |
| GO:004589 | HUMAN HGNC=30747 UniProtKB=P61201,HUMAN HGNC=9349 UniProtKB=Q9NQX1                                                                                                                                                                                                                                                                                                                                             | templated                              |
| 2         |                                                                                                                                                                                                                                                                                                                                                                                                                |                                        |
| GO:000462 |                                                                                                                                                                                                                                                                                                                                                                                                                |                                        |
| 2         | HUMAN HGNC=16268 UniProtKB=Q8IY17                                                                                                                                                                                                                                                                                                                                                                              | lysophospholipase activity             |
| GO:000709 | HUMAN HGNC=23432 UniProtKB=Q9NXG0,HUMAN HGNC=29327 UniProtKB=Q5VZ46,HUMAN HGNC=9847 UniProtKB=P43487                                                                                                                                                                                                                                                                                                           | centrosome cycle                       |
| 8         | HUMAN HGNC=31332 UniProtKB=Q6IQ22,HUMAN HGNC=7007 UniProtKB=P61006,HUMAN HGNC=9778 UniProtKB=P20337,HUMAN HGNC=1628 UniProtKB=P08571                                                                                                                                                                                                                                                                           |                                        |
| GO:000930 |                                                                                                                                                                                                                                                                                                                                                                                                                | protein secretion                      |
| 6         |                                                                                                                                                                                                                                                                                                                                                                                                                | positive regulation of MAPK            |
| GO:004341 | HUMAN HGNC=26068 UniProtKB=Q6IAA8,HUMAN HGNC=6091 UniProtKB=P06213                                                                                                                                                                                                                                                                                                                                             | cascade                                |
| 0         |                                                                                                                                                                                                                                                                                                                                                                                                                | inorganic anion                        |
| GO:009866 |                                                                                                                                                                                                                                                                                                                                                                                                                | transmembrane transport                |
| 1         | HUMAN HGNC=10989 UniProtKB=Q00325                                                                                                                                                                                                                                                                                                                                                                              |                                        |

HUMAN|HGNC=25951|UniProtKB=Q6ULP2,HUMAN|Gene=SEP15|  
 UniProtKB=O60613,HUMAN|HGNC=9862|UniProtKB=P61225,HU  
 MAN|HGNC=3383|UniProtKB=P27105,HUMAN|HGNC=9784|UniPr  
 otKB=P61020,HUMAN|HGNC=11834|UniProtKB=P29401,HUMAN|  
 HGNC=555|UniProtKB=O43747,HUMAN|HGNC=6407|UniProtKB=  
 P01116,HUMAN|HGNC=813|UniProtKB=Q93084,HUMAN|HGNC=1  
 3487|UniProtKB=Q96QK1,HUMAN|HGNC=463|UniProtKB=Q9UKV  
 5,HUMAN|HGNC=11445|UniProtKB=Q15833,HUMAN|HGNC=851|  
 UniProtKB=P38606,HUMAN|HGNC=9756|UniProtKB=O00391,HU  
 MAN|HGNC=15453|UniProtKB=Q9H3P7,HUMAN|HGNC=9761|Uni  
 ProtKB=Q15907,HUMAN|HGNC=24636|UniProtKB=Q9UHB6,HUM  
 AN|HGNC=22222|UniProtKB=Q9C0H2,HUMAN|HGNC=453|UniPro  
 tKB=P02760,HUMAN|HGNC=20589|UniProtKB=Q9P0J7,HUMAN|H  
 GNC=10996|UniProtKB=O14975,HUMAN|HGNC=9785|UniProtKB=  
 P51148,HUMAN|HGNC=2230|UniProtKB=P53621,HUMAN|HGNC=  
 2431|UniProtKB=P55060,HUMAN|HGNC=16268|UniProtKB=Q8IY1  
 7,HUMAN|HGNC=11937|UniProtKB=P32970,HUMAN|HGNC=9772  
 |UniProtKB=Q13637,HUMAN|HGNC=3380|UniProtKB=Q9Y2J2,HU  
 MAN|HGNC=12644|UniProtKB=Q15836,HUMAN|HGNC=24251|U  
 niProtKB=Q9Y3A6,HUMAN|HGNC=8569|UniProtKB=P29122,HUM  
 AN|HGNC=4606|UniProtKB=P30101,HUMAN|HGNC=25153|UniPr  
 otKB=Q96EY5,HUMAN|HGNC=9782|UniProtKB=P61018,HUMAN|  
 HGNC=5253|UniProtKB=P07900,HUMAN|HGNC=11446|UniProtKB  
 =O00186,HUMAN|HGNC=11172|UniProtKB=Q13596,HUMAN|HG  
 NC=16499|UniProtKB=Q96DA2,HUMAN|HGNC=16075|UniProtKB=  
 Q9H082,HUMAN|HGNC=11442|UniProtKB=O15400,HUMAN|HGN  
 C=5258|UniProtKB=P08238,HUMAN|HGNC=9852|UniProtKB=O95  
 373,HUMAN|HGNC=16090|UniProtKB=O00264,HUMAN|HGNC=11  
 740|UniProtKB=P02787,HUMAN|HGNC=2295|UniProtKB=P00450,  
 HUMAN|HGNC=16996|UniProtKB=Q15363,HUMAN|HGNC=30384  
 |UniProtKB=Q9UMX5,HUMAN|HGNC=14902|UniProtKB=Q9NRW1  
 ,HUMAN|HGNC=26212|UniProtKB=P61009,HUMAN|HGNC=9935|  
 UniProtKB=Q14257,HUMAN|HGNC=11984|UniProtKB=Q6ZVM7,H  
 UMAN|HGNC=15999|UniProtKB=Q9NZV5,HUMAN|HGNC=23186|  
 UniProtKB=Q14677,HUMAN|HGNC=8016|UniProtKB=P46459,HU  
 MAN|HGNC=9788|UniProtKB=P51149,HUMAN|HGNC=26068|Uni  
 ProtKB=Q6IAA8,HUMAN|HGNC=33704|UniProtKB=Q66K66,HUMA  
 N|HGNC=16524|UniProtKB=P61106,HUMAN|HGNC=20726|UniPr  
 otKB=Q8WVM8,HUMAN|HGNC=3382|UniProtKB=Q08495,HUMAN  
 |HGNC=1458|UniProtKB=O43852,HUMAN|HGNC=13529|UniProtK  
 B=Q9Y2B0,HUMAN|HGNC=2532|UniProtKB=P08311,HUMAN|HGN  
 C=5238|UniProtKB=P11021,HUMAN|HGNC=23787|UniProtKB=Q9  
 P1W3,HUMAN|HGNC=16998|UniProtKB=P49755,HUMAN|HGNC=  
 11357|UniProtKB=Q92783,HUMAN|HGNC=13531|UniProtKB=Q9Y  
 2Q0,HUMAN|HGNC=16695|UniProtKB=P51572,HUMAN|HGNC=30  
 167|UniProtKB=P13667,HUMAN|HGNC=8761|UniProtKB=Q9BUL8,  
 HUMAN|HGNC=2479|UniProtKB=O76096,HUMAN|HGNC=20954|  
 UniProtKB=Q9NP79,HUMAN|HGNC=15461|UniProtKB=P55145,HU  
 MAN|HGNC=21354|UniProtKB=Q86XR7,HUMAN|HGNC=9857|Uni  
 ProtKB=P61224,HUMAN|HGNC=1546|UniProtKB=P50454,HUMAN  
 |HGNC=15447|UniProtKB=Q9Y4G6,HUMAN|HGNC=9086|UniProt  
 KB=P60201,HUMAN|HGNC=30220|UniProtKB=Q96AA3,HUMAN|H  
 GNC=15578|UniProtKB=Q96D71,HUMAN|HGNC=3530|UniProtKB  
 =P00748,HUMAN|HGNC=9786|UniProtKB=P20340,HUMAN|HGNC

GO:000588

6

plasma membrane

=71703|UniProtKB=Q9Y5LO,HUMAN|HGNC=9164|UniProtKB=Q9719,HUMAN|HGNC=9070|UniProtKB=P08567,HUMAN|HGNC=55|UniProtKB=O15439,HUMAN|HGNC=10534|UniProtKB=Q9NR31,HUMAN|HGNC=15588|UniProtKB=Q96C24,HUMAN|HGNC=6631|UniProtKB=P49257,HUMAN|HGNC=649|UniProtKB=P48444,HUMAN|HGNC=18370|UniProtKB=Q9H0U4,HUMAN|HGNC=24641|UniProtKB=Q7Z3J2,HUMAN|HGNC=19983|UniProtKB=Q86YS6,HUMAN|HGNC=12666|UniProtKB=P55072,HUMAN|HGNC=11133|UniProtKB=O95721,HUMAN|HGNC=10382|UniProtKB=P04844,HUMAN|HGNC=11131|UniProtKB=O00161,HUMAN|HGNC=25240|UniProtKB=C4KM02,HUMAN|HGNC=9411|UniProtKB=P14314,HUMAN|HGNC=11034|UniProtKB=Q2Y0W8,HUMAN|HGNC=17943|UniProtKB=Q9GZP9,HUMAN|HGNC=6752|UniProtKB=P20645,HUMAN|HGNC=15606|UniProtKB=Q9UHA4,HUMAN|HGNC=11767|UniProtKB=O43294,HUMAN|HGNC=24175|UniProtKB=Q9P035,HUMAN|HGNC=16089|UniProtKB=O15173,HUMAN|HGNC=9855|UniProtKB=P62834,HUMAN|HGNC=9581|UniProtKB=Q9H939,HUMAN|HGNC=8533|UniProtKB=P51575,HUMAN|HGNC=17059|UniProtKB=Q9NTJ5,HUMAN|HGNC=11358|UniProtKB=O75886,HUMAN|HGNC=17859|UniProtKB=Q5SRE5,HUMAN|HGNC=11828|UniProtKB=Q9UDY2,HUMAN|HGNC=25541|UniProtKB=P57088,HUMAN|HGNC=9840|UniProtKB=P11234,HUMAN|HGNC=2090|UniProtKB=P09496,HUMAN|HGNC=15687|UniProtKB=O75563,HUMAN|HGNC=11056|UniProtKB=P48067,HUMAN|HGNC=7821|UniProtKB=P14543,HUMAN|HGNC=30052|UniProtKB=Q8TEM1,HUMAN|HGNC=9778|UniProtKB=P20337,HUMAN|HGNC=8548|UniProtKB=P07237,HUMAN|HGNC=533|UniProtKB=P04083,HUMAN|HGNC=2047|UniProtKB=O00501,HUMAN|HGNC=568|UniProtKB=O14617,HUMAN|HGNC=10447|UniProtKB=P10301,HUMAN|HGNC=18673|UniProtKB=Q96JB5,HUMAN|HGNC=1473|UniProtKB=P27824,HUMAN|HGNC=8504|UniProtKB=Q969R2,HUMAN|HGNC=5241|UniProtKB=P11142,HUMAN|HGNC=9802|UniProtKB=P15153,HUMAN|HGNC=10608|UniProtKB=P47872,HUMAN|HGNC=13937|UniProtKB=O95866,HUMAN|HGNC=3244|UniProtKB=Q9NZN3,HUMAN|HGNC=7228|UniProtKB=P22897,HUMAN|HGNC=13921|UniProtKB=O95870,HUMAN|HGNC=12649|UniProtKB=O95292,HUMAN|HGNC=15878|UniProtKB=Q9NQ75,HUMAN|HGNC=20653|UniProtKB=Q8IVB4,HUMAN|HGNC=4234|UniProtKB=P55040,HUMAN|HGNC=26486|UniProtKB=Q6PJW8,HUMAN|HGNC=4045|UniProtKB=O75084,HUMAN|HGNC=18756|UniProtKB=Q9BYZ6,HUMAN|HGNC=652|UniProtKB=P84077,HUMAN|HGNC=2315|UniProtKB=Q96FN4,HUMAN|HGNC=30697|UniProtKB=Q8TB96,HUMAN|HGNC=30550|UniProtKB=O60337,HUMAN|HGNC=3377|UniProtKB=P11171,HUMAN|HGNC=2689|UniProtKB=P09172,HUMAN|HGNC=10701|UniProtKB=Q15436,HUMAN|HGNC=6499|UniProtKB=P11279,HUMAN|HGNC=11326|UniProtKB=P51571,HUMAN|HGNC=8062|UniProtKB=P49790,HUMAN|HGNC=9758|UniProtKB=P62820,HUMAN|HGNC=12647|UniProtKB=Q9BV40,HUMAN|HGNC=2232|UniProtKB=P35606,HUMAN|HGNC=885|UniProtKB=O75882,HUMAN|HGNC=18263|UniProtKB=Q9UL25,HUMAN|HGNC=812|UniProtKB=P16615,HUMAN|HGNC=692|UniProtKB=P40616,HUMAN|HGNC=31332|UniProtKB=Q6IQ22,HUMAN|HGNC=18587|UniProtKB=O94901,HUMAN|HGNC=18621|UniProtKB=Q9Y2V7,HUMAN|HGNC=1455|UniProtKB=P27797,HUMAN|HGNC=2231|UniProtKB=P53618,HUMAN|HGNC=11845|UniProtKB=Q9Y490,HUMAN|HGNC=11845

|            |                                                                                                                                                                                                                                                                                                                                                                                                                                                                                                                                                                                                                                                                                                                                                                                                                                                                                                                                                                                                                                                                                                                                                                                                                                                                                                                                                                                                                                                                                                                                                                                                                                                                                                                                                                     |                                    |
|------------|---------------------------------------------------------------------------------------------------------------------------------------------------------------------------------------------------------------------------------------------------------------------------------------------------------------------------------------------------------------------------------------------------------------------------------------------------------------------------------------------------------------------------------------------------------------------------------------------------------------------------------------------------------------------------------------------------------------------------------------------------------------------------------------------------------------------------------------------------------------------------------------------------------------------------------------------------------------------------------------------------------------------------------------------------------------------------------------------------------------------------------------------------------------------------------------------------------------------------------------------------------------------------------------------------------------------------------------------------------------------------------------------------------------------------------------------------------------------------------------------------------------------------------------------------------------------------------------------------------------------------------------------------------------------------------------------------------------------------------------------------------------------|------------------------------------|
|            | MAN HGNC=913 UniProtKB=P20160,HUMAN HGNC=2728 UniProtKB=P39656,HUMAN HGNC=3157 UniProtKB=Q92838,HUMAN HGNC=17643 UniProtKB=Q9HD26,HUMAN HGNC=20175 UniProtKB=Q9Y3E0,HUMAN HGNC=12648 UniProtKB=Q9P0L0,HUMAN HGNC=18304 UniProtKB=Q14019,HUMAN HGNC=2850 UniProtKB=Q9Y6T7,HUMAN HGNC=1801 UniProtKB=O95674,HUMAN HGNC=10381 UniProtKB=P04843,HUMAN HGNC=17955 UniProtKB=O43504,HUMAN HGNC=4036 UniProtKB=O15117,HUMAN HGNC=6501 UniProtKB=P13473,HUMAN HGNC=10011 UniProtKB=Q15382,HUMAN HGNC=11429 UniProtKB=O75558,HUMAN HGNC=9847 UniProtKB=P43487,HUMAN HGNC=12203 UniProtKB=A0A075B6N3,HUMAN HGNC=10840 UniProtKB=P29353,HUMAN HGNC=15663 UniProtKB=Q9NYU2,HUMAN HGNC=16768 UniProtKB=O60391,HUMAN HGNC=24878 UniProtKB=Q9BVK6,HUMAN HGNC=9767 UniProtKB=O00194                                                                                                                                                                                                                                                                                                                                                                                                                                                                                                                                                                                                                                                                                                                                                                                                                                                                                                                                                                                                 |                                    |
| GO:0008092 | HUMAN HGNC=9069 UniProtKB=Q15149,HUMAN HGNC=492 UniProtKB=P16157                                                                                                                                                                                                                                                                                                                                                                                                                                                                                                                                                                                                                                                                                                                                                                                                                                                                                                                                                                                                                                                                                                                                                                                                                                                                                                                                                                                                                                                                                                                                                                                                                                                                                                    | cytoskeletal protein binding       |
| GO:0006626 | HUMAN HGNC=5261 UniProtKB=P10809                                                                                                                                                                                                                                                                                                                                                                                                                                                                                                                                                                                                                                                                                                                                                                                                                                                                                                                                                                                                                                                                                                                                                                                                                                                                                                                                                                                                                                                                                                                                                                                                                                                                                                                                    | protein targeting to mitochondrion |
| GO:0031253 | HUMAN HGNC=11148 UniProtKB=Q16658,HUMAN HGNC=4381 UniProtKB=Q14344                                                                                                                                                                                                                                                                                                                                                                                                                                                                                                                                                                                                                                                                                                                                                                                                                                                                                                                                                                                                                                                                                                                                                                                                                                                                                                                                                                                                                                                                                                                                                                                                                                                                                                  | cell projection membrane           |
| GO:0030261 | HUMAN HGNC=4716 UniProtKB=P16403,HUMAN HGNC=4718 UniProtKB=P10412,HUMAN HGNC=4719 UniProtKB=P16401 HUMAN HGNC=5575 UniProtKB=A0A0B4J1V2,HUMAN HGNC=9784 UniProtKB=P61020,HUMAN HGNC=5645 UniProtKB=A0A0C4DH34,HUMAN HGNC=5549 UniProtKB=A0A0C4DH31,HUMAN HGNC=5554 UniProtKB=P01743,HUMAN HGNC=5480 UniProtKB=P01880,HUMAN HGNC=5659 UniProtKB=A0A0C4DH38,HUMAN HGNC=5634 UniProtKB=A0A075B7F0,HUMAN HGNC=38476 UniProtKB=B9A064,HUMAN HGNC=5861 UniProtKB=A0M8Q6,HUMAN HGNC=5647 UniProtKB=A0A087WSY4,HUMAN HGNC=5563 UniProtKB=A0A075B7D0,HUMAN HGNC=5856 UniProtKB=P0DOY2,HUMAN HGNC=5606 UniProtKB=P01763,HUMAN HGNC=9785 UniProtKB=P51148,HUMAN HGNC=9801 UniProtKB=P63000,HUMAN HGNC=5576 UniProtKB=P01817,HUMAN HGNC=5528 UniProtKB=P01861,HUMAN HGNC=5541 UniProtKB=P01871,HUMAN HGNC=5585 UniProtKB=A0A0C4DH32,HUMAN HGNC=9782 UniProtKB=P61018,HUMAN HGNC=9802 UniProtKB=P15153,HUMAN HGNC=5551 UniProtKB=A0A0C4DH33,HUMAN HGNC=3244 UniProtKB=Q9NZN3,HUMAN HGNC=5526 UniProtKB=P01859,HUMAN HGNC=5657 UniProtKB=P0DP08,HUMAN Ensembl=ENSG00000282639 UniProtKB=A0A0J9YX35,HUMAN HGNC=19760 UniProtKB=Q96T51,HUMAN Gene=HV309_HUMAN UniProtKB=P01782,HUMAN HGNC=18756 UniProtKB=Q9BYZ6,HUMAN HGNC=5654 UniProtKB=P01825,HUMAN HGNC=5553 UniProtKB=A0A0A0MS14,HUMAN Gene=HV108_HUMAN UniProtKB=P0DP01,HUMAN HGNC=5624 UniProtKB=A0A0B4J1X5,HUMAN HGNC=5620 UniProtKB=P01780,HUMAN HGNC=23186 UniProtKB=Q14677,HUMAN HGNC=5598 UniProtKB=A0A0C4DH35,HUMAN HGNC=5580 UniProtKB=P01762,HUMAN HGNC=5633 UniProtKB=A0A075B7D8,HUMAN HGNC=5582 UniProtKB=A0A0B4J1V0,HUMAN HGNC=5478 UniProtKB=P01876,HUMAN HGNC=26068 UniProtKB=Q6IAA8,HUMAN HGNC=5617 UniProtKB=A0A075B6Q5,HUMAN HGNC=5594 UniProtKB=P0DP03,HUMAN HGNC=5655 UniProtKB=A0A0C4DH41,HUMAN HGNC=563 | chromosome condensation            |
| GO:0006897 |                                                                                                                                                                                                                                                                                                                                                                                                                                                                                                                                                                                                                                                                                                                                                                                                                                                                                                                                                                                                                                                                                                                                                                                                                                                                                                                                                                                                                                                                                                                                                                                                                                                                                                                                                                     | endocytosis                        |

|            |                                                                                                                                                                                                                                                                                                                                                                                                                                                                                                                                                                                                                                                                                                                                                                                                                                                                                                                                                                                                                                                                                                                                                                                                                                                                                                            |                                               |
|------------|------------------------------------------------------------------------------------------------------------------------------------------------------------------------------------------------------------------------------------------------------------------------------------------------------------------------------------------------------------------------------------------------------------------------------------------------------------------------------------------------------------------------------------------------------------------------------------------------------------------------------------------------------------------------------------------------------------------------------------------------------------------------------------------------------------------------------------------------------------------------------------------------------------------------------------------------------------------------------------------------------------------------------------------------------------------------------------------------------------------------------------------------------------------------------------------------------------------------------------------------------------------------------------------------------------|-----------------------------------------------|
|            | 6 UniProtKB=A0A075B7B8,HUMAN HGNC=5586 UniProtKB=A0A0B4J1V1,HUMAN HGNC=5581 UniProtKB=P01766,HUMAN HGNC=5622 UniProtKB=A0A0B4J1Y9,HUMAN HGNC=5652 UniProtKB=A0A075B6R2,HUMAN HGNC=5593 UniProtKB=P0DP02,HUMAN HGNC=3419 UniProtKB=P42566,HUMAN HGNC=5479 UniProtKB=P01877,HUMAN HGNC=5619 UniProtKB=A0A0C4DH42,HUMAN HGNC=5596 UniProtKB=P01772,HUMAN HGNC=5550 UniProtKB=P23083,HUMAN HGNC=5604 UniProtKB=A0A0B4J1X8,HUMAN HGNC=570 UniProtKB=P53677,HUMAN HGNC=5525 UniProtKB=P01857,HUMAN HGNC=5662 UniProtKB=A0A0B4J1U7,HUMAN HGNC=24634 UniProtKB=Q9UBC2,HUMAN HGNC=5601 UniProtKB=A0A0C4DH36,HUMAN HGNC=5716 UniProtKB=P01834,HUMAN HGNC=5588 UniProtKB=P01764,HUMAN HGNC=15578 UniProtKB=Q96D71,HUMAN HGNC=5857 UniProtKB=P0DOY3,HUMAN HGNC=1736 UniProtKB=P60953,HUMAN HGNC=5610 UniProtKB=P01767,HUMAN Ensembl=ENSG00000282150 UniProtKB=A0A0J9YY99,HUMAN HGNC=5527 UniProtKB=P01860                                                                                                                                                                                                                                                                                                                                                                                                              |                                               |
|            | HUMAN HGNC=1488 UniProtKB=P52907,HUMAN HGNC=2696 UniProtKB=Q9UJU6,HUMAN HGNC=6513 UniProtKB=Q14847,HUMAN HGNC=17905 UniProtKB=Q9Y613,HUMAN HGNC=2252 UniProtKB=P31146,HUMAN HGNC=15750 UniProtKB=P60981,HUMAN HGNC=3338 UniProtKB=Q14247,HUMAN HGNC=9581 UniProtKB=Q9H939,HUMAN HGNC=706 UniProtKB=O15145,HUMAN HGNC=12012 UniProtKB=P06753,HUMAN HGNC=3382 UniProtKB=Q08495,HUMAN HGNC=544 UniProtKB=P08133,HUMAN HGNC=170 UniProtKB=P61158,HUMAN HGNC=3750 UniProtKB=Q13045,HUMAN HGNC=24636 UniProtKB=Q9UHB6,HUMAN HGNC=2254 UniProtKB=Q9ULV4,HUMAN HGNC=2253 UniProtKB=Q9BR76,HUMAN HGNC=708 UniProtKB=O15511,HUMAN HGNC=6528 UniProtKB=P13796,HUMAN HGNC=27937 UniProtKB=Q6ZVH7,HUMAN HGNC=6111 UniProtKB=Q13576,HUMAN HGNC=12690 UniProtKB=P09327,HUMAN HGNC=11148 UniProtKB=Q16658,HUMAN HGNC=705 UniProtKB=O15144,HUMAN HGNC=2695 UniProtKB=Q16643,HUMAN HGNC=12754 UniProtKB=O75083,HUMAN HGNC=1874 UniProtKB=P23528,HUMAN HGNC=169 UniProtKB=P61160,HUMAN HGNC=18304 UniProtKB=Q14019,HUMAN HGNC=26161 UniProtKB=P57737,HUMAN HGNC=12010 UniProtKB=P09493,HUMAN HGNC=9621 UniProtKB=Q6IBS0,HUMAN HGNC=243 UniProtKB=P35611,HUMAN HGNC=704 UniProtKB=O15143,HUMAN HGNC=12013 UniProtKB=P67936,HUMAN HGNC=12011 UniProtKB=P07951,HUMAN HGNC=1491 UniProtKB=P47756,HUMAN HGNC=4844 UniProtKB=P14317 |                                               |
| GO:0051015 | HUMAN HGNC=12690 UniProtKB=P09327,HUMAN HGNC=3750 UniProtKB=Q13045                                                                                                                                                                                                                                                                                                                                                                                                                                                                                                                                                                                                                                                                                                                                                                                                                                                                                                                                                                                                                                                                                                                                                                                                                                         | actin filament binding                        |
| GO:0005546 |                                                                                                                                                                                                                                                                                                                                                                                                                                                                                                                                                                                                                                                                                                                                                                                                                                                                                                                                                                                                                                                                                                                                                                                                                                                                                                            | phosphatidylinositol-4,5-bisphosphate binding |
| GO:0072330 | HUMAN HGNC=16369 UniProtKB=Q99497                                                                                                                                                                                                                                                                                                                                                                                                                                                                                                                                                                                                                                                                                                                                                                                                                                                                                                                                                                                                                                                                                                                                                                                                                                                                          | monocarboxylic acid biosynthetic process      |
| PC00083    | HUMAN HGNC=10632 UniProtKB=P13501                                                                                                                                                                                                                                                                                                                                                                                                                                                                                                                                                                                                                                                                                                                                                                                                                                                                                                                                                                                                                                                                                                                                                                                                                                                                          | cytokine negative regulation of               |
| GO:2001243 | HUMAN HGNC=992 UniProtKB=Q07817,HUMAN HGNC=11283 UniProtKB=P12931                                                                                                                                                                                                                                                                                                                                                                                                                                                                                                                                                                                                                                                                                                                                                                                                                                                                                                                                                                                                                                                                                                                                                                                                                                          | intrinsic apoptotic signaling pathway         |
| GO:0030036 | HUMAN HGNC=6111 UniProtKB=Q13576,HUMAN HGNC=2067 UniProtKB=O00151,HUMAN HGNC=17468 UniProtKB=Q96HC4,HUMAN HGNC=22958 UniProtKB=Q9NR12,HUMAN HGNC=11126 UniProtKB=P53814                                                                                                                                                                                                                                                                                                                                                                                                                                                                                                                                                                                                                                                                                                                                                                                                                                                                                                                                                                                                                                                                                                                                    | actin cytoskeleton organization               |

|           |                                                                                                                                                                                                                                                                                                                                                                                                                                                                                                                     |                                                     |
|-----------|---------------------------------------------------------------------------------------------------------------------------------------------------------------------------------------------------------------------------------------------------------------------------------------------------------------------------------------------------------------------------------------------------------------------------------------------------------------------------------------------------------------------|-----------------------------------------------------|
| GO:007134 |                                                                                                                                                                                                                                                                                                                                                                                                                                                                                                                     | cellular response to cytokine stimulus              |
| 5         | HUMAN HGNC=7183 UniProtKB=P41218                                                                                                                                                                                                                                                                                                                                                                                                                                                                                    |                                                     |
|           | HUMAN HGNC=1504 UniProtKB=P42574,HUMAN HGNC=19388 UniProtKB=P49593,HUMAN HGNC=6766 UniProtKB=Q8WXG6,HUMAN HGNC=533 UniProtKB=P04083,HUMAN HGNC=7850 UniProtKB=P22392,HUMAN HGNC=1507 UniProtKB=P55212,HUMAN HGNC=19986 UniProtKB=P99999                                                                                                                                                                                                                                                                             |                                                     |
| GO:000691 |                                                                                                                                                                                                                                                                                                                                                                                                                                                                                                                     | apoptotic process                                   |
| 5         |                                                                                                                                                                                                                                                                                                                                                                                                                                                                                                                     |                                                     |
| GO:001063 | HUMAN HGNC=17865 UniProtKB=Q96A26,HUMAN HGNC=1050 UniProtKB=P55957,HUMAN HGNC=533 UniProtKB=P04083                                                                                                                                                                                                                                                                                                                                                                                                                  | positive regulation of organelle organization       |
| 8         | HUMAN HGNC=535 UniProtKB=P50995,HUMAN HGNC=15848 UniProtKB=Q14141,HUMAN HGNC=2973 UniProtKB=O00429,HUMAN HGNC=2713 UniProtKB=O75935,HUMAN HGNC=2974 UniProtKB=P50570,HUMAN HGNC=9164 UniProtKB=Q99719,HUMAN HGNC=1717 UniProtKB=Q16181,HUMAN HGNC=10252 UniProtKB=O75116,HUMAN HGNC=29125 UniProtKB=Q9UQ16,HUMAN HGNC=7729 UniProtKB=Q15019                                                                                                                                                                         |                                                     |
| GO:009014 |                                                                                                                                                                                                                                                                                                                                                                                                                                                                                                                     | membrane fission                                    |
| 8         | HUMAN HGNC=6171 UniProtKB=Q08881,HUMAN HGNC=4037 UniProtKB=P06241,HUMAN HGNC=12841 UniProtKB=P07947,HUMAN HGNC=11283 UniProtKB=P12931,HUMAN HGNC=6735 UniProtKB=P07948                                                                                                                                                                                                                                                                                                                                              |                                                     |
| GO:001810 |                                                                                                                                                                                                                                                                                                                                                                                                                                                                                                                     | peptidyl-tyrosine phosphorylation                   |
| 8         |                                                                                                                                                                                                                                                                                                                                                                                                                                                                                                                     |                                                     |
| GO:004341 |                                                                                                                                                                                                                                                                                                                                                                                                                                                                                                                     |                                                     |
| 4         | HUMAN HGNC=4861 UniProtKB=Q9NRZ9                                                                                                                                                                                                                                                                                                                                                                                                                                                                                    | macromolecule methylation                           |
| GO:000554 |                                                                                                                                                                                                                                                                                                                                                                                                                                                                                                                     |                                                     |
| 3         | HUMAN HGNC=23186 UniProtKB=Q14677                                                                                                                                                                                                                                                                                                                                                                                                                                                                                   | phospholipid binding                                |
| GO:004255 |                                                                                                                                                                                                                                                                                                                                                                                                                                                                                                                     |                                                     |
| 5         | HUMAN HGNC=26200 UniProtKB=Q9H668                                                                                                                                                                                                                                                                                                                                                                                                                                                                                   | MCM complex                                         |
| GO:007181 | HUMAN HGNC=31797 UniProtKB=P0C7V6,HUMAN HGNC=12347 UniProtKB=Q9Y4A5                                                                                                                                                                                                                                                                                                                                                                                                                                                 | DUBm complex                                        |
| 9         |                                                                                                                                                                                                                                                                                                                                                                                                                                                                                                                     | meiotic chromosome separation                       |
| GO:005130 | HUMAN HGNC=12401 UniProtKB=P33981                                                                                                                                                                                                                                                                                                                                                                                                                                                                                   | neuromuscular synaptic transmission                 |
| 7         |                                                                                                                                                                                                                                                                                                                                                                                                                                                                                                                     |                                                     |
| GO:000727 |                                                                                                                                                                                                                                                                                                                                                                                                                                                                                                                     | fibroblast growth factor receptor signaling pathway |
| 4         | HUMAN HGNC=16831 UniProtKB=O95153                                                                                                                                                                                                                                                                                                                                                                                                                                                                                   |                                                     |
| GO:000854 |                                                                                                                                                                                                                                                                                                                                                                                                                                                                                                                     |                                                     |
| 3         | HUMAN HGNC=15527 UniProtKB=Q86Z14                                                                                                                                                                                                                                                                                                                                                                                                                                                                                   |                                                     |
|           | HUMAN HGNC=3011 UniProtKB=Q07507,HUMAN HGNC=11771 UniProtKB=Q15582,HUMAN HGNC=1682 UniProtKB=Q08722                                                                                                                                                                                                                                                                                                                                                                                                                 | cell adhesion molecule                              |
| PC00069   | HUMAN HGNC=6047 UniProtKB=Q16891,HUMAN HGNC=7687 UniProtKB=O00483,HUMAN HGNC=23526 UniProtKB=Q8NE86,HUMAN HGNC=2265 UniProtKB=P13073,HUMAN HGNC=2267 UniProtKB=P20674                                                                                                                                                                                                                                                                                                                                               |                                                     |
| GO:009880 |                                                                                                                                                                                                                                                                                                                                                                                                                                                                                                                     | inner mitochondrial membrane protein complex        |
| 0         | HUMAN HGNC=9414 UniProtKB=Q13976,HUMAN HGNC=3757 UniProtKB=O75955,HUMAN HGNC=9406 UniProtKB=Q16513,HUMAN HGNC=9380 UniProtKB=P17612,HUMAN HGNC=9395 UniProtKB=P05771,HUMAN HGNC=18994 UniProtKB=Q8TDC3,HUMAN HGNC=6876 UniProtKB=Q16539,HUMAN HGNC=2850 UniProtKB=Q9Y6T7,HUMAN HGNC=10432 UniProtKB=P51812,HUMAN HGNC=30410 UniProtKB=Q9BXA6,HUMAN HGNC=6529 UniProtKB=Q13094,HUMAN HGNC=20292 UniProtKB=Q9Y376,HUMAN HGNC=6871 UniProtKB=P28482,HUMAN HGNC=19825 UniProtKB=Q6SA08,HUMAN HGNC=9381 UniProtKB=P22694 |                                                     |
| GO:003555 |                                                                                                                                                                                                                                                                                                                                                                                                                                                                                                                     | intracellular signal transduction                   |
| 6         |                                                                                                                                                                                                                                                                                                                                                                                                                                                                                                                     |                                                     |
| GO:000268 |                                                                                                                                                                                                                                                                                                                                                                                                                                                                                                                     | regulation of leukocyte migration                   |
| 5         | HUMAN HGNC=533 UniProtKB=P04083                                                                                                                                                                                                                                                                                                                                                                                                                                                                                     |                                                     |
| GO:003013 | HUMAN HGNC=21354 UniProtKB=Q86XR7,HUMAN HGNC=24251 UniProtKB=Q9Y3A6,HUMAN HGNC=6631 UniProtKB=P49257,HUMAN HGNC=1504 UniProtKB=P42574,HUMAN HGNC=19388 UniProtKB=P49593,HUMAN HGNC=6766 UniProtKB=Q8WXG6,HUMAN HGNC=533 UniProtKB=P04083,HUMAN HGNC=7850 UniProtKB=P22392,HUMAN HGNC=1507 UniProtKB=P55212,HUMAN HGNC=19986 UniProtKB=P99999                                                                                                                                                                        | COPII-coated ER to Golgi transport vesicle          |
| 4         |                                                                                                                                                                                                                                                                                                                                                                                                                                                                                                                     |                                                     |

|            |                                                                                                                                                                                                                                                                                                                                                                                                                                                                                                                                                                                                                                                                                                                                   |                                                                       |
|------------|-----------------------------------------------------------------------------------------------------------------------------------------------------------------------------------------------------------------------------------------------------------------------------------------------------------------------------------------------------------------------------------------------------------------------------------------------------------------------------------------------------------------------------------------------------------------------------------------------------------------------------------------------------------------------------------------------------------------------------------|-----------------------------------------------------------------------|
|            | MAN HGNC=16998 UniProtKB=P49755,HUMAN HGNC=16996 UniProtKB=Q15363,HUMAN HGNC=24878 UniProtKB=Q9BVK6                                                                                                                                                                                                                                                                                                                                                                                                                                                                                                                                                                                                                               |                                                                       |
|            | HUMAN HGNC=11179 UniProtKB=P00441,HUMAN HGNC=9353 UniProtKB=P32119,HUMAN HGNC=1516 UniProtKB=P04040,HUMAN HGNC=4553 UniProtKB=P07203,HUMAN HGNC=533 UniProtKB=P04083,HUMAN HGNC=9352 UniProtKB=Q06830                                                                                                                                                                                                                                                                                                                                                                                                                                                                                                                             | response to inorganic substance                                       |
| GO:0010035 | HUMAN HGNC=26200 UniProtKB=Q9H668,HUMAN HGNC=7326 UniProtKB=P20585                                                                                                                                                                                                                                                                                                                                                                                                                                                                                                                                                                                                                                                                | DNA biosynthetic process                                              |
| GO:0070925 | HUMAN HGNC=15474 UniProtKB=Q9Y566,HUMAN HGNC=14294 UniProtKB=Q9BYB0,HUMAN HGNC=9788 UniProtKB=P51149                                                                                                                                                                                                                                                                                                                                                                                                                                                                                                                                                                                                                              | organelle assembly                                                    |
| GO:0035032 | HUMAN HGNC=19692 UniProtKB=Q96F24<br>HUMAN HGNC=2713 UniProtKB=O75935,HUMAN HGNC=11873 UniProtKB=Q9NYL9,HUMAN HGNC=12690 UniProtKB=P09327,HUMAN HGNC=2712 UniProtKB=Q13561,HUMAN HGNC=3382 UniProtKB=Q08495,HUMAN HGNC=14653 UniProtKB=Q9HBI1,HUMAN HGNC=3750 UniProtKB=Q13045,HUMAN HGNC=1491 UniProtKB=P47756,HUMAN HGNC=24636 UniProtKB=Q9UHB6                                                                                                                                                                                                                                                                                                                                                                                 | phosphatidylinositol 3-kinase complex, class III                      |
| GO:0015629 |                                                                                                                                                                                                                                                                                                                                                                                                                                                                                                                                                                                                                                                                                                                                   | actin cytoskeleton                                                    |
| GO:0001934 | HUMAN HGNC=11766 UniProtKB=P01137<br>HUMAN HGNC=25758 UniProtKB=Q8TED0,HUMAN HGNC=7183 UniProtKB=P41218,HUMAN HGNC=226 UniProtKB=P78563,HUMAN HGNC=7910 UniProtKB=P06748                                                                                                                                                                                                                                                                                                                                                                                                                                                                                                                                                          | positive regulation of protein phosphorylation                        |
| GO:0005730 |                                                                                                                                                                                                                                                                                                                                                                                                                                                                                                                                                                                                                                                                                                                                   | nucleolus                                                             |
| GO:0070509 | HUMAN HGNC=23526 UniProtKB=Q8NE86                                                                                                                                                                                                                                                                                                                                                                                                                                                                                                                                                                                                                                                                                                 | calcium ion import                                                    |
| GO:0051649 | HUMAN HGNC=16051 UniProtKB=Q8TEW0,HUMAN HGNC=11491 UniProtKB=P43405                                                                                                                                                                                                                                                                                                                                                                                                                                                                                                                                                                                                                                                               | establishment of localization in cell                                 |
| GO:0016922 | HUMAN HGNC=7670 UniProtKB=Q9Y6Q9                                                                                                                                                                                                                                                                                                                                                                                                                                                                                                                                                                                                                                                                                                  | nuclear receptor binding                                              |
| GO:1902532 | HUMAN HGNC=18233 UniProtKB=Q8NDB2,HUMAN HGNC=20250 UniProtKB=Q96IF1                                                                                                                                                                                                                                                                                                                                                                                                                                                                                                                                                                                                                                                               | negative regulation of intracellular signal transduction              |
| GO:1902600 | HUMAN HGNC=800 UniProtKB=P50993                                                                                                                                                                                                                                                                                                                                                                                                                                                                                                                                                                                                                                                                                                   | proton transmembrane transport                                        |
| GO:0032008 | HUMAN HGNC=17955 UniProtKB=Q43504,HUMAN HGNC=15606 UniProtKB=Q9UHA4                                                                                                                                                                                                                                                                                                                                                                                                                                                                                                                                                                                                                                                               | positive regulation of TOR signaling                                  |
| GO:0015079 | HUMAN HGNC=800 UniProtKB=P50993,HUMAN HGNC=806 UniProtKB=P54709                                                                                                                                                                                                                                                                                                                                                                                                                                                                                                                                                                                                                                                                   | potassium ion transmembrane transporter activity                      |
| GO:0000777 |                                                                                                                                                                                                                                                                                                                                                                                                                                                                                                                                                                                                                                                                                                                                   | condensed chromosome kinetochore                                      |
| GO:0002183 | HUMAN HGNC=24054 UniProtKB=Q8NG31<br>HUMAN HGNC=3282 UniProtKB=P60842,HUMAN Gene=EIF2S3L UniProtKB=Q2VIR3,HUMAN HGNC=3285 UniProtKB=P23588<br>HUMAN HGNC=33108 UniProtKB=Q6NX45,HUMAN HGNC=14008 UniProtKB=Q9BW11,HUMAN HGNC=7803 UniProtKB=Q12986,HUMAN HGNC=18411 UniProtKB=Q3KNW1,HUMAN HGNC=14010 UniProtKB=Q8IWI9,HUMAN HGNC=11364 UniProtKB=P40763,HUMAN HGNC=6702 UniProtKB=Q32MZ4,HUMAN HGNC=15935 UniProtKB=Q9H4I2,HUMAN HGNC=29084 UniProtKB=O75123,HUMAN HGNC=26427 UniProtKB=Q96ND8,HUMAN HGNC=17801 UniProtKB=Q8NHY6,HUMAN HGNC=11594 UniProtKB=Q96SF7,HUMAN HGNC=9459 UniProtKB=Q92786,HUMAN HGNC=9866 UniProtKB=P13631,HUMAN HGNC=51815 UniProtKB=A0A1W2PPM1,HUMAN HGNC=3815 UniProtKB=Q12951,HUMAN HGNC=7967 UniP | cytoplasmic translational initiation                                  |
| GO:0000981 |                                                                                                                                                                                                                                                                                                                                                                                                                                                                                                                                                                                                                                                                                                                                   | DNA-binding transcription factor activity, RNA polymerase II-specific |

|            |                                                                                                                                                                                                                                                                                                                                                                                      |                                       |
|------------|--------------------------------------------------------------------------------------------------------------------------------------------------------------------------------------------------------------------------------------------------------------------------------------------------------------------------------------------------------------------------------------|---------------------------------------|
|            | rotKB=Q96RI1,HUMAN HGNC=11590 UniProtKB=Q16650,HUMAN HGNC=7547 UniProtKB=P10243                                                                                                                                                                                                                                                                                                      |                                       |
| GO:0009913 | HUMAN HGNC=1504 UniProtKB=P42574,HUMAN HGNC=533 UniProtKB=P04083                                                                                                                                                                                                                                                                                                                     | epidermal cell differentiation        |
| GO:0016925 | HUMAN HGNC=11124 UniProtKB=P55854,HUMAN HGNC=11125 UniProtKB=P61956                                                                                                                                                                                                                                                                                                                  | protein sumoylation                   |
| GO:0004930 | HUMAN HGNC=4472 UniProtKB=Q14330,HUMAN HGNC=3540 UniProtKB=Q96RI0                                                                                                                                                                                                                                                                                                                    | G protein-coupled receptor activity   |
| GO:0042802 | HUMAN HGNC=8876 UniProtKB=P17858,HUMAN HGNC=2520 UniProtKB=Q9NRF8,HUMAN HGNC=8878 UniProtKB=Q01813                                                                                                                                                                                                                                                                                   | identical protein binding             |
| GO:0042552 | HUMAN HGNC=2479 UniProtKB=O76096,HUMAN HGNC=9086 UniProtKB=P60201                                                                                                                                                                                                                                                                                                                    | myelination                           |
| GO:0042593 | HUMAN HGNC=4922 UniProtKB=P19367,HUMAN HGNC=6091 UniProtKB=P06213                                                                                                                                                                                                                                                                                                                    | glucose homeostasis                   |
| GO:0009451 | HUMAN HGNC=226 UniProtKB=P78563                                                                                                                                                                                                                                                                                                                                                      | RNA modification                      |
|            | HUMAN HGNC=9391 UniProtKB=P13861,HUMAN HGNC=4395 UniProtKB=P19086,HUMAN HGNC=4384 UniProtKB=P63096,HUMAN HGNC=10608 UniProtKB=P47872,HUMAN HGNC=4381 UniProtKB=Q14344,HUMAN HGNC=4387 UniProtKB=P08754,HUMAN HGNC=9392 UniProtKB=P31323,HUMAN HGNC=4385 UniProtKB=P04899,HUMAN HGNC=4393 UniProtKB=P11488,HUMAN HGNC=4390 UniProtKB=P50148                                           | regulation of cAMP-mediated signaling |
| GO:0043949 |                                                                                                                                                                                                                                                                                                                                                                                      |                                       |
| GO:0019902 | HUMAN HGNC=7618 UniProtKB=O14974                                                                                                                                                                                                                                                                                                                                                     | phosphatase binding                   |
|            | HUMAN HGNC=16089 UniProtKB=O15173,HUMAN HGNC=16524 UniProtKB=P61106,HUMAN HGNC=11326 UniProtKB=P51571,HUMAN HGNC=11429 UniProtKB=O75558,HUMAN HGNC=19983 UniProtKB=Q86YS6,HUMAN HGNC=16090 UniProtKB=O00264,HUMAN HGNC=9758 UniProtKB=P62820,HUMAN HGNC=13921 UniProtKB=O95870,HUMAN HGNC=18673 UniProtKB=Q96JB5,HUMAN HGNC=18370 UniProtKB=Q9H0U4,HUMAN HGNC=30384 UniProtKB=Q9UMX5 | endomembrane system                   |
| GO:0012505 |                                                                                                                                                                                                                                                                                                                                                                                      |                                       |
